# Supplementary material for: Slo2 potassium channel function depends on RNA editing-regulated expression of a SCYL1 protein
Source: eLife. 2020 Apr 21;9:e53986. doi: 10.7554/eLife.53986 (PMC7195191; doi:10.7554/eLife.53986)
Supplement: Figure 2—source data 1. [file elife-53986-fig2-data1.xlsx]

## Sheet: Panel_A
	locomotion speed (µm/sec)
	wild type	slo-2(gf)	slo-2(gf);adr-2(gv42)	adr-2(gv42)
	174.205	70.5293	148.632	187.743
	207.728	36.5731	70.1918	133.354
	128.214	56.1807	65.1184	157.037
	134.746	90.751	83.5457	124.286
	193.507	24.7949	63.881	186.817
	175.574	71.536	150.821	215.492
	107.47	47.0286	100.68	190.259
	124.064	63.0197	71.6535	135.636
	113.49	45.1243	90.9504	143.21
	101.753	46.9732	123.159	125.38
			109.567
average	146.075	55.2511	98.0182	159.921
n	10	10	11	10
SE	12.0926	6.08753	9.58171	10.3022

## Sheet: Panel_B
wild type steady-state												Mean	SE		adr-2(gv42) steady-state											Mean	SE		adr-2(gv42);slo-2(gf)steady-state												Mean	SE		slo2(gf)steady-state
filename	2019_05_20_0003	2019_05_20_0011	2019_05_20_0025	2019_05_20_0028	2019_05_20_0036	2019_05_20_0064	2019_05_20_0062	2019_05_20_0066	2019_05_20_0060	2019_05_20_0068	2019_05_20_0058				filename	2019_05_09_0000	2019_05_09_0018	2019_05_09_0026	2019_05_09_0030	2019_05_09_0041	2019_05_09_0002	2019_05_09_0004	2019_05_09_0020	2019_05_09_0023	2019_05_09_0032				filename	2019_05_10_0010	2019_05_10_0013	2019_05_10_0021	2019_05_10_0026	2019_05_10_0030	2019_05_10_0032	2019_05_10_0044	2019_05_10_0048	2019_05_10_0052	2019_05_10_0056	2019_05_10_0059				filename	2019_02_25_0000	2019_02_25_0002	2019_02_25_0004	2019_02_25_0006	2019_02_25_0011
step_voltage															step_voltage														step_voltage															step_voltage
-60	-0.36329	0.21334	-3.25563	-5.6326	-1.61778	1.49737	1.07938	1.47887	0.70119	-0.23673	0.80088	-0.485	0.66957		-60	0.07362	0.00438	0.17559	0.76501	0.13611	0.6292	0.83133	-1.06179	-0.50431	0.43838	0.14875	0.18498		-60	0.34317	2.67985	-0.4304	15.3171	11.0345	1.32079	6.56391	1.3065	5.3251	3.29672	3.03856	4.52689	1.45675		-60	1.61541	-2.35763	-3.57042	-0.17102	2.16629
-50	1.61556	0.36132	0.943	3.05019	-1.47011	1.1589	0.80036	1.26921	0.4721	0.31598	0.69949	0.83782	0.32725		-50	0.84296	1.08097	1.25096	1.75219	-0.64617	1.95822	2.4151	0.54794	1.39763	1.88749	1.24873	0.27532		-50	20.8813	24.1642	17.1515	33.2116	28.5557	2.31444	11.0191	5.71811	10.3334	9.25197	8.33753	15.5399	3.01141		-50	12.2202	24.1035	33.4055	40.4672	39.1807
-40	2.98733	0.30018	4.95186	7.25243	-0.85062	-0.35871	-0.50054	-0.33162	-0.52991	0.74492	-0.3712	1.20856	0.81046		-40	2.32418	2.33716	2.21588	3.31534	2.37693	3.45557	3.43335	2.38357	3.12027	2.93524	2.78975	0.16161		-40	48.9418	52.3625	38.1886	55.6656	47.4013	3.9957	16.3508	10.3211	15.3504	14.1873	14.462	28.8388	5.89953		-40	33.4916	53.8906	71.483	83.4307	86.7912
-30	3.86852	0.9209	5.57841	9.10876	0.0076	0.39688	0.45875	0.23523	0.44583	0.58143	0.24648	1.98625	0.89201		-30	3.1883	3.60184	3.01353	3.97156	0.13239	3.98567	4.5717	4.1564	4.50676	4.43798	3.55661	0.41612		-30	82.8114	81.4152	60.7868	83.9192	67.1695	9.165	24.0683	18.4641	21.4317	23.1857	23.8071	45.1113	9.00401		-30	63.5167	93.5676	115.902	136.225	140.733
-20	3.66927	3.0939	6.27249	14.0281	4.0955	3.36152	3.11644	3.49924	3.2842	2.68466	3.64426	4.61359	0.98319		-20	4.25352	4.44548	3.80315	3.99826	3.90405	4.97652	6.0843	5.44402	5.63373	5.18256	4.77256	0.2537		-20	122.781	114.862	91.9918	114.298	90.2269	14.8922	34.1126	24.9266	32.5832	33.6509	34.8831	64.4735	12.6593		-20	96.1902	140.046	174.516	192.016	209.918
-10	5.22449	7.16035	10.3659	23.3343	12.8855	8.91261	7.45624	8.24967	7.36584	6.72752	8.49679	9.65265	1.49675		-10	7.47847	4.88265	6.31253	7.0423	10.0589	9.19135	9.1639	7.0105	6.67667	6.07644	7.38937	0.51066		-10	168.579	154.413	121.292	138.742	112.221	24.3528	43.0751	44.0332	46.9967	49.8931	51.3267	86.8114	15.8512		-10	135.216	192.73	239.548	260.277	286.772
0	28.2163	19.0564	17.7075	33.2009	27.8269	15.5946	15.6059	14.951	13.0277	12.473	14.4216	19.2802	2.14068		0	13.6914	9.331	9.35828	11.4495	17.4114	16.7827	13.9001	11.4626	9.6027	9.34149	12.2331	0.97522		0	221.218	192.743	153.362	174.335	139.33	49.0634	67.7669	62.9474	67.606	73.3338	71.6491	115.76	18.5996		0	195.4	269.322	311.656	338.968	375.067
10	53.3206	38.4337	39.925	54.3765	50.9299	23.5744	24.8082	22.9044	25.4773	19.7232	22.9803	34.2231	4.09381		10	27.9182	25.0998	16.7913	20.6448	37.9879	24.9405	22.9751	21.9593	14.6773	17.3655	23.0359	2.11655		10	265.019	233.515	192.167	205.406	162.917	81.0039	93.0678	81.5282	83.8775	92.9548	95.6941	144.286	20.9166		10	286.295	351.44	402.554	423.054	476.474
20	78.1617	61.7326	66.4333	81.3926	74.8563	40.1448	38.6913	41.2336	39.4095	36.7692	39.546	54.3974	5.46874		20	45.0993	44.7527	24.507	35.2298	61.1452	40.9684	35.6378	38.5043	21.6383	26.6177	37.4101	3.69664		20	310.832	269.892	230.688	227.745	188.406	122.118	121.444	116.324	113.002	121.563	124.214	176.93	21.7136		20	383.056	445.87	492.695	516.304	581.881
30	103.268	78.595	97.4359	111.092	101.839	60.1275	67.9442	57.1208	60.2801	56.8104	61.7428	77.8414	6.44094		30	61.5158	67.9887	32.6971	49.8006	78.2516	61.2889	48.5689	56.1086	34.7422	38.199	52.9162	4.72302		30	344.183	300.409	264.28	248.788	214.248	151.423	162.129	140.591	146.59	151.931	140.926	205.954	21.986		30	516.179	556.798	591.88	610.548	682.737
40	118.569	97.322	131.844	149.224	163.558	96.102	94.5562	90.4219	92.9219	91.6724	95.0764	111.024	7.84626		40	77.4014	91.3363	41.1886	64.3312	89.666	76.8729	66.3078	81.0044	49.6735	48.7191	68.6501	5.56656		40	374.629	332.392	303.478	265.925	236.41	186.126	194.083	180.407	176.015	178.4	179.609	237.043	21.6118		40	618.193	665.145	676.053	698.161	790.785
50	129.393	102.219	188.729	201.492	214.846	130.144	125.295	119.556	139.219	117.808	122.964	144.697	11.5088		50	102.741	112.848	52.5055	75.3204	105.542	89.2915	91.8432	99.936	67.7554	69.1215	86.6905	6.21028		50	400.44	359.736	335.748	295.888	251.16	243.946	239.069	216.905	208.256	218.068	213.988	271.2	20.1134		50	742.012	785.044	767.025	780.108	882.788
60	145.024	115.31	238.794	262.278	252.456	159.571	185.787	158.65	182.293	153.849	167.802	183.801	14.2924		60	111.011	132.579	61.571	85.3233	112.365	109.051	109.13	106.78	89.5079	80.4507	99.7768	6.43835		60	422.57	382.563	382.348	321.046	260.715	307.362	264.735	248.996	229.206	242.783	250.425	301.159	20.2788		60	861.51	890.586	869.48	858.221	944.589
70	175.471	140.871	294.146	327.645	318.259	195.339	221.653	205.375	222.423	182.509	227.891	228.326	18.2209		70	139.24	157.758	76.9316	106.712	143.351	138.806	133.088	138.995	117.896	97.3004	125.008	7.83669		70	441.772	407.343	406.777	335.71	272.61	360.974	296.169	271.207	256.144	268.652	277.932	326.844	20.2431		70	988.336	1016.25	950.192	912.091	992.663
wild type peak												Mean	SE		adr-2(gv42) peak											Mean	SE		adr-2(gv42);slo-2(gf)peak												Mean	SE		slo2(gf) peak
step_voltage															step_voltage														step_voltage															step_voltage
-60	1.29442	1.0804	3.51129	23.4829	0.82397	3.63159	2.92969	3.479	2.99072	1.89209	3.02124	4.37612	1.93571		-60	2.36407	2.27993	1.66016	9.38129	2.00195	-0.79346	2.58163	0.98625	-1.68457	2.36113	2.11384	0.9283		-60	6.25479	3.41227	23.4149	18.4631	13.8245	4.08935	8.66699	3.21141	8.5144	5.52368	5.34058	9.156	2.00579		-60	6.79358	4.06862	4.09751	8.55802	9.28877
-50	3.24147	1.5992	4.9151	26.099	0.97656	3.66211	3.14331	3.8147	2.68555	2.53296	3.20435	5.07948	2.12616		-50	5.56841	4.06844	3.10059	4.54989	5.24902	0.91553	4.32681	2.53654	0.04883	3.81145	3.41755	0.56914		-50	31.8895	25.2629	50.0872	40.8935	32.2571	5.06592	14.4653	8.85716	13.855	12.4817	12.5122	22.5116	4.38993		-50	21.6862	36.2341	44.4549	50.1234	48.9006
-40	4.43547	2.30111	7.26495	28.8436	2.2583	3.17383	2.9602	2.68555	2.86865	4.27246	2.59399	5.7871	2.3465		-40	4.31719	5.97378	4.18701	17.2424	4.94385	2.44141	9.63631	4.40422	1.81885	9.72826	6.46933	1.45769		-40	62.0409	55.048	76.5155	66.9556	55.9082	8.94165	22.0947	16.6697	21.3623	19.4702	22.4304	38.8579	7.33485		-40	47.7482	72.7942	86.1899	103.35	104.015
-30	6.31029	2.60628	10.3472	32.6152	5.24902	4.82178	4.76074	4.73022	4.48608	5.40161	3.78418	7.73751	2.55545		-30	5.69048	6.45449	5.23682	5.90714	1.97754	3.57056	7.20751	6.30851	4.26025	6.51696	5.31303	0.50666		-30	97.3192	89.2277	109.078	98.2056	78.4912	14.4959	32.7148	24.7873	33.9966	34.6985	33.5693	58.7803	10.6646		-30	85.4069	112.345	139.719	165.174	162.06
-20	9.43467	8.86239	14.4061	38.4038	12.97	10.498	10.0403	9.0332	8.94165	7.84302	9.70459	12.7398	2.63041		-20	6.66705	7.92246	6.64063	6.0347	7.71484	5.70679	9.59609	16.5258	6.23779	8.1774	8.12235	1.00586		-20	143.096	126.825	154.488	133.881	105.072	24.0173	44.9829	39.5273	43.2434	44.22	45.929	82.2983	15.0714		-20	123.92	166.056	198.769	222.344	240.124
-10	12.8756	11.7921	20.6011	54.258	26.1536	18.7988	15.564	16.1743	17.3645	16.0522	18.0054	20.6945	3.55084		-10	11.0921	9.77061	10.2417	10.3246	15.2466	12.4207	13.9793	11.6674	8.76465	11.4126	11.492	0.62067		-10	196.684	171.015	187.233	182.098	129.456	36.2854	60.73	61.5305	67.5964	71.2585	68.0847	111.997	18.5867		-10	171.833	223.49	270.79	299.081	346.447
0	38.2756	26.6847	33.2964	69.582	45.5322	28.9612	29.8157	34.5459	27.5574	23.8342	27.0386	35.0113	3.92732		0	25.6795	15.3887	17.749	15.7085	30.7129	20.6604	21.165	19.2358	16.6382	15.358	19.8296	1.58713		0	251.738	207.026	227.272	206.085	162.384	73.3337	89.3555	88.1418	89.6606	97.168	92.5293	144.063	20.3607		0	242.389	305.948	366.441	399.542	419.933
10	68.7419	54.7608	58.0767	99.3912	78.0334	44.5862	48.4619	41.1072	43.2434	38.6658	41.2292	56.0271	5.74198		10	39.1683	38.0304	24.1943	35.7951	54.6143	34.668	35.0603	32.81	23.7183	29.3645	34.7423	2.77279		10	316.68	262.69	282.967	260.559	195.435	101.959	122.498	110.847	110.962	121.582	125.519	182.881	24.8786		10	335.102	394.449	479.01	499.027	552.502
20	98.5355	79.4801	101.137	132.556	109.802	63.9648	73.9136	73.7305	60.1501	58.5938	64.5447	83.3099	7.22686		20	60.378	57.7459	35.5957	44.6211	72.8882	55.6335	51.5861	54.8803	32.4097	37.2523	50.2991	4.02366		20	363.799	308.954	330.086	299.896	240.875	151.337	158.966	145.179	152.008	147.919	149.109	222.557	26.3438		20	457.05	502.665	579.303	620.261	696.484
30	118.213	101.727	131.166	179.051	147.888	99.0295	110.291	86.0596	104.919	87.1277	93.6279	114.464	8.56998		30	79.2989	83.7215	46.3013	66.3491	93.0786	76.2939	68.8453	78.9892	51.9409	54.8684	69.9687	4.78327		30	425.078	358.149	385.994	331.177	271.149	180.389	204.987	188.117	183.075	187.775	184.021	263.628	28.4832		30	576.435	629.984	720.357	761.337	845.409
40	137.757	129.285	176.058	222.03	222.29	132.904	145.111	123.962	135.803	133.697	150.726	155.42	10.7918		40	93.5506	114.964	59.0332	80.7306	108.594	96.344	90.6717	105.246	68.9331	63.0929	88.116	6.17509		40	483.306	408.442	446.938	355.469	307.159	223.297	232.513	232.978	211.548	232.391	233.337	306.125	30.3667		40	688.373	784.098	854.195	905.381	1022.96
50	167.487	135.358	239.137	266.348	278.229	176.361	182.526	169.861	182.678	167.358	179.169	194.956	13.6786		50	129.592	140.319	66.3208	94.477	127.783	132.935	134.096	132.505	98.6694	88.4727	114.517	8.00627		50	532.012	453.241	501.534	384.247	333.679	284.821	280.334	275.672	262.695	265.93	277.283	350.132	30.5692		50	847.614	967.631	953.78	1055.38	1213.88
60	179.916	146.863	307.192	345.392	361.114	208.282	250.549	208.954	235.718	201.843	223.846	242.697	20.5187		60	138.503	178.608	87.6465	108.582	126.245	150.146	149.352	147.117	137.683	110.743	133.463	8.22259		60	600.859	485.712	560.402	441.894	359.497	361.176	326.782	332.13	313.934	325.348	326.813	403.141	31.1183		60	1042.62	1138.47	1172.94	1203.04	1348.16
70	208.698	181.775	370.76	416.899	406.433	250.122	303.436	267.426	300.049	253.265	285.98	294.986	22.9581		70	164.626	208.289	88.4644	141.125	162.585	174.225	170.958	169.138	154.529	141.704	157.564	9.74386		70	636.138	537.47	586.23	474.976	378.448	444.977	359.314	361.183	348.389	355.957	352.997	439.643	31.6424		70	1274.07	1347.88	1334.26	1363.52	1492.08
[truncated: 5 more columns]

## Sheet: wild type trace
step volt	-60	-50	-40	-30	-20	-10	0	10	20	30	40	50	60	70
time(ms)
0.5	0.64087	0.82397	0.24414	-0.36621	-0.33569	-1.7395	-1.5564	-1.98364	-2.19727	-1.80054	-2.41089	-1.98364	-3.14331	-1.28174
1	1.2207	0.79346	1.25122	0.21362	-1.12915	-0.54932	-2.38037	-1.31226	-1.43433	-1.86157	-2.34985	-2.31934	-2.0752	-1.43433
1.5	1.2207	1.80054	0.39673	-0.7019	-0.82397	-0.85449	-0.91553	-0.39673	-3.32642	-1.19019	-1.86157	-1.95312	-1.95312	-2.01416
2	2.47192	0.42725	0.85449	0.48828	-0.5188	-0.57983	-1.28174	-1.52588	-2.44141	-1.43433	-2.31934	-1.19019	-1.95312	-1.95312
2.5	1.95312	1.40381	0.7019	-0.21362	-0.33569	-0.64087	-0.85449	-2.19727	-1.37329	-1.43433	-2.34985	-2.28882	-2.74658	-2.53296
3	2.0752	0.24414	0.64087	0.30518	-0.79346	-1.25122	-1.00708	-1.46484	-1.80054	-1.49536	-1.49536	-1.34277	-2.47192	-1.37329
3.5	2.31934	1.25122	0.57983	0	-0.64087	-1.19019	-0.24414	-1.80054	-3.41797	-1.70898	-1.80054	-0.76294	-2.41089	-1.25122
4	1.40381	1.15967	0.54932	-0.33569	0.03052	-0.61035	-0.57983	-0.76294	-3.17383	-2.41089	-2.01416	-2.68555	-2.16675	-1.98364
4.5	1.70898	1.43433	1.15967	0.18311	-0.76294	-1.2207	-1.46484	-1.19019	-3.11279	-2.22778	-1.64795	-2.04468	-2.92969	-2.80762
5	1.28174	0.48828	0.54932	-0.30518	-1.49536	-2.31934	-2.10571	-2.13623	-2.74658	-3.02124	-2.62451	-2.89917	-3.54004	-3.84521
5.5	1.25122	0.94604	1.40381	0.82397	-1.77002	-0.88501	-2.01416	-1.52588	-3.02124	-2.9602	-1.89209	-3.41797	-2.86865	-3.9978
6	0.30518	0.42725	0.18311	0.33569	-0.15259	-0.42725	-1.64795	-1.64795	-2.71606	-2.47192	-2.68555	-2.31934	-3.05176	-2.56348
6.5	0.18311	0.24414	-0.39673	-0.21362	-1.49536	-1.67847	-1.31226	-2.34985	-2.9602	-2.19727	-2.53296	-2.68555	-3.14331	-3.26538
7	0	0	-0.57983	-0.7019	-1.58691	-1.52588	-2.22778	-1.46484	-3.8147	-1.83105	-3.02124	-2.2583	-2.7771	-2.31934
7.5	0.5188	0.15259	0.7019	-0.7019	-1.19019	-1.95312	-1.83105	-2.74658	-2.59399	-2.89917	-2.59399	-2.99072	-2.2583	-3.11279
8	0.12207	0.88501	-0.21362	-0.45776	-2.44141	-1.31226	-2.68555	-1.80054	-3.08228	-2.9602	-2.68555	-3.41797	-2.83813	-2.83813
8.5	0.57983	0.36621	0.30518	-0.12207	-1.80054	-1.64795	-1.52588	-1.64795	-2.47192	-2.92969	-2.19727	-2.7771	-2.62451	-3.05176
9	1.15967	0.12207	0.91553	0.18311	-1.7395	-1.25122	-2.38037	-2.59399	-2.80762	-2.59399	-1.77002	-3.2959	-3.14331	-2.50244
9.5	0.97656	0.48828	0.21362	0.15259	-1.12915	-0.54932	-2.01416	-1.49536	-1.7395	-1.7395	-3.05176	-2.34985	-3.14331	-3.41797
10	0.88501	0.42725	0.18311	-0.27466	-0.33569	-0.42725	-1.61743	-2.38037	-3.2959	-2.34985	-2.47192	-2.56348	-2.71606	-3.14331
10.5	0.88501	0.48828	0.06104	-0.33569	-0.88501	-0.73242	-2.47192	-2.04468	-3.54004	-1.86157	-2.62451	-2.31934	-3.20435	-2.50244
11	0.27466	-0.7019	0.36621	-0.57983	-1.83105	-0.48828	-1.06812	-1.61743	-3.32642	-1.89209	-2.80762	-2.74658	-2.53296	-1.67847
11.5	0.94604	0.33569	1.40381	-0.09155	-0.57983	-0.45776	-2.04468	-1.31226	-2.22778	-2.01416	-2.13623	-2.80762	-2.13623	-1.89209
12	0.12207	0.7019	0.36621	0.30518	0	-1.77002	-0.97656	-2.50244	-2.89917	-2.0752	-2.13623	-2.7771	-2.59399	-2.65503
12.5	0.88501	0.12207	1.5564	-0.15259	-1.09863	-0.94604	-0.67139	-2.47192	-2.34985	-1.67847	-2.89917	-2.01416	-2.65503	-2.71606
13	0.57983	1.0376	1.06812	0.15259	-1.25122	-1.0376	-2.10571	-1.67847	-2.41089	-2.65503	-2.2583	-2.7771	-2.9602	-1.67847
13.5	0.61035	0.15259	0.64087	0.36621	-1.28174	-0.57983	-0.91553	-1.37329	-2.53296	-2.22778	-2.04468	-2.59399	-2.68555	-3.08228
14	0.18311	0	2.13623	0.12207	-1.40381	-0.79346	-1.2207	-1.2207	-3.05176	-1.95312	-3.02124	-2.10571	-2.22778	-2.53296
14.5	0.94604	0.18311	1.06812	-0.42725	-0.54932	-0.91553	-2.41089	-1.61743	-2.74658	-2.89917	-1.80054	-2.50244	-2.47192	-3.63159
15	0.79346	0.24414	1.49536	-0.18311	-1.15967	-1.31226	-2.50244	-1.95312	-2.16675	-2.83813	-2.0752	-2.83813	-2.31934	-2.92969
15.5	0.30518	0.27466	1.58691	0.18311	-0.45776	-2.04468	-1.40381	-0.88501	-2.22778	-2.92969	-2.74658	-2.71606	-1.92261	-2.34985
16	1.40381	0.57983	1.12915	0.85449	-1.0376	-1.00708	-1.83105	-1.7395	-1.09863	-2.86865	-2.9602	-2.92969	-2.86865	-2.28882
16.5	1.06812	19.928	37.9944	55.5115	74.8901	93.2922	112.061	131.531	149.75	168.304	184.967	202.24	219.086	236.725
17	1.31226	5.88989	10.6506	14.6179	19.2871	24.0479	29.8767	35.553	46.4172	62.1338	69.1833	85.022	93.7805	98.3581
17.5	1.49536	4.79126	7.8125	10.7117	14.4653	19.2261	27.3743	37.1399	44.0369	60.6995	71.3501	77.0874	82.2754	95.8862
18	1.64795	3.9978	7.26318	9.27734	11.9018	18.0664	30.2429	39.3677	44.9524	48.3093	63.1714	76.9043	71.167	87.677
18.5	1.58691	3.44849	6.53076	7.84302	10.9558	16.1438	24.3835	31.4026	40.4663	48.706	52.7649	80.9631	70.5261	89.5996
19	1.67847	3.08228	5.43213	6.65283	10.7117	16.449	21.4844	31.189	34.8511	51.178	59.7229	75.3479	80.9021	94.6655
19.5	1.95312	3.54004	5.49316	7.1106	10.3455	14.1296	22.3694	32.5317	33.2336	47.2412	57.9834	86.9446	84.6863	111.938
20	1.49536	4.02832	5.12695	6.28662	11.5051	13.4888	21.8201	33.6609	32.2571	39.6118	60.5469	84.1675	95.6116	112.122
20.5	1.77002	3.08228	4.85229	5.92041	10.3149	12.5122	21.3928	30.5176	30.0598	44.0674	71.4111	93.1702	103.821	118.439
21	1.31226	2.31934	3.9978	5.85937	10.6812	12.6953	18.5547	24.5666	31.8298	46.0205	70.9839	97.4426	87.3413	122.681
21.5	1.2207	2.28882	3.8147	4.88281	8.20923	12.7258	18.7378	26.0315	34.4849	45.5627	66.4368	91.6443	85.4187	133.697
22	0.61035	2.34985	3.90625	5.24902	8.27026	11.9018	19.3176	22.8577	30.3345	45.4407	67.7185	84.8999	91.9495	132.751
22.5	0.76294	1.58691	3.60107	6.31714	7.23267	10.1318	19.3787	30.6702	28.656	53.2532	71.106	82.7637	102.905	130.676
23	0.5188	1.0376	4.24194	4.97436	8.57544	10.1929	17.7002	27.5574	30.5176	54.5044	59.021	90.8203	101.44	125.305
23.5	0.54932	0.61035	2.2583	3.11279	6.50024	13.855	17.4561	26.5503	28.7476	44.5862	64.5447	92.5903	103.729	125.732
24	1.0376	0.48828	3.20435	3.69263	5.09644	10.7117	16.9678	28.9917	33.02	45.929	54.5654	108.49	122.467	128.845
24.5	0.45776	1.43433	2.31934	3.35693	6.22559	9.42993	15.5029	25.0244	36.7432	45.99	51.4221	105.316	122.62	127.686
25	0.09155	1.15967	1.83105	2.59399	4.79126	9.91821	17.7612	24.0479	35.3088	49.1333	52.0325	110.779	125.031	150.574
25.5	0.06104	1.06812	2.7771	3.2959	5.18799	8.78906	18.1274	26.825	45.6543	51.2085	67.4133	93.9941	118.744	139.13
26	0.30518	1.5564	1.40381	3.11279	5.82886	10.1623	19.2261	23.7732	39.4592	52.4902	78.125	94.4214	107.452	124.481
26.5	0.42725	0.91553	1.92261	4.5166	6.7749	8.30078	16.1133	20.5689	44.3115	50.2319	68.512	99.3042	116.455	126.068
27	1.0376	0.91553	1.83105	4.63867	6.37817	9.00268	18.5852	30.5481	38.7268	53.8635	71.9604	93.75	126.129	132.843
27.5	0.30518	1.15967	1.83105	2.86865	4.63867	7.17163	16.1133	32.3792	37.2925	58.4412	64.0869	96.8017	118.256	138.153
28	0.73242	1.77002	3.35693	2.62451	6.01196	8.91113	13.5498	33.9966	37.0789	62.0422	62.3779	93.4143	141.144	147.797
28.5	0.85449	1.7395	3.26538	3.17383	8.45337	9.15527	15.9302	30.0903	40.7105	61.1572	70.0073	97.0459	131.805	141.968
29	1.09863	1.00708	1.95312	3.41797	5.92041	8.97217	16.9983	33.3252	37.5366	64.6057	68.7256	124.512	122.253	168.365
29.5	0.57983	1.0376	2.2583	2.47192	6.5918	9.3689	18.4631	33.1726	34.729	58.136	59.3567	137.238	127.106	164.124
30	1.58691	0.82397	2.62451	2.86865	5.67627	12.4512	17.1814	34.2102	33.9661	50.4455	63.0493	125.061	124.329	191.65
30.5	0.94604	0.36621	2.74658	3.2959	5.88989	12.5122	17.5476	31.9214	32.2266	47.8821	65.155	114.807	117.95	168.243
31	0.82397	0.67139	2.83813	2.50244	4.73022	9.52148	16.9372	33.1116	31.3721	52.7649	57.312	122.864	124.634	176.697
31.5	1.31226	0.79346	2.80762	3.08228	5.95093	8.97217	17.4561	32.2876	32.5928	48.9197	55.603	115.112	143.951	185.181
32	1.34277	0.27466	2.19727	3.84521	6.74438	9.58252	15.7165	33.2336	38.208	57.6477	56.6101	108.063	134.094	188.965
32.5	1.89209	0.94604	2.44141	3.38745	7.26318	9.94873	15.8081	27.2522	31.0974	57.251	63.1103	110.87	122.345	195.557
33	0.97656	0.94604	1.92261	2.13623	7.32422	11.1084	14.5569	24.5666	30.7617	49.7437	66.4062	118.561	146.698	195.251
33.5	1.34277	1.5564	1.86157	2.01416	6.34766	15.3809	16.8152	25.7873	31.4026	53.6804	69.9463	120.361	139.13	191.162
34	2.34985	0.97656	2.68555	3.66211	7.78198	14.5569	16.6931	24.1699	45.2576	68.2678	86.6394	115.936	134.369	192.688
34.5	1.89209	1.46484	3.08228	4.18091	8.11767	14.4043	17.5171	26.2756	39.4287	69.3359	92.6514	120.331	135.681	190.063
35	1.89209	1.92261	2.92969	3.75366	8.3313	9.79614	16.9983	28.2288	42.2668	58.5938	77.4231	132.202	139.923	200.836
35.5	2.13623	1.61743	2.10571	3.38745	12.146	8.05664	13.4888	25.3296	41.1072	57.1594	72.7539	127.594	146.057	190.887
36	1.89209	1.00708	2.50244	1.98364	7.69043	8.91113	17.3645	28.1677	38.269	55.9997	81.7261	120.85	147.858	199.677
36.5	1.7395	1.46484	2.38037	2.01416	8.66699	9.21631	15.4114	27.4048	26.062	61.554	69.7021	117.004	152.374	178.131
37	2.41089	0.7019	2.68555	2.50244	6.68335	12.6953	18.0664	20.0195	26.1841	63.324	74.2493	136.444	122.742	182.037
37.5	2.31934	1.00708	3.32642	2.16675	5.7373	12.5122	23.5901	25.2686	29.9683	67.5049	86.4868	143.036	147.339	195.526
38	1.92261	1.19019	2.41089	3.14331	4.02832	11.2915	20.0806	20.0195	29.1748	70.9534	80.3833	155.243	143.158	198.09
38.5	1.0376	0.27466	2.16675	1.25122	6.68335	11.7188	17.6392	21.1487	31.8604	67.688	68.3289	143.646	133.179	196.106
39	0.79346	0.64087	1.15967	1.15967	7.08008	10.6812	17.5476	26.7944	33.6914	81.5735	67.0166	139.221	145.477	199.829
39.5	1.46484	0.39673	0.94604	1.15967	7.84302	8.54492	19.165	21.6064	37.2314	71.3806	83.8623	139.862	156.525	202.606
40	1.34277	0.33569	0.85449	1.98364	6.74438	8.39233	17.5476	22.9187	34.4849	70.404	84.8999	135.345	144.745	213.501
40.5	0.88501	0.73242	1.28174	1.37329	6.56128	6.95801	17.7612	21.4539	31.0974	66.6199	79.0405	119.812	146.393	233.917
41	0.54932	0.39673	1.37329	0.88501	7.84302	9.73511	18.4631	19.8364	35.0647	67.5354	89.8743	128.265	156.25	242.065
41.5	0.57983	0.61035	1.09863	1.00708	7.44629	8.36182	20.5078	18.9819	35.614	66.1011	80.0476	116.974	142.944	217.316
42	1.12915	0.12207	0.79346	0.7019	7.47681	12.4512	18.3716	19.1345	38.8184	66.1621	76.5991	116.791	140.045	200.531
42.5	1.40381	0.39673	1.0376	1.61743	4.57764	13.2446	17.8833	19.3787	42.1753	68.1457	70.6482	136.871	136.658	162.506
43	1.31226	0.06104	-0.09155	1.52588	4.39453	9.85718	13.1226	19.8364	41.5344	72.2656	70.0073	134.125	117.767	197.357
43.5	1.7395	-0.12207	1.15967	1.28174	4.18091	7.32422	14.5569	22.9187	40.6189	73.7915	66.8945	107.544	146.759	212.372
44	0.82397	0.27466	0.61035	1.49536	2.99072	9.12475	12.2681	25.9399	41.3208	68.9697	65.0329	114.41	167.877	219.971
44.5	0.54932	-0.27466	0.82397	1.06812	5.21851	10.1013	12.6038	20.5689	42.2668	63.7512	75.4394	123.352	154.358	219.025
45	0.67139	0.61035	0.45776	0.64087	6.65283	11.7493	13.4888	22.7356	42.633	61.5234	83.0994	127.686	154.449	224.518
45.5	1.46484	0.57983	0.67139	1.83105	4.18091	10.2539	14.4043	29.0832	43.6096	59.6313	76.7517	115.54	142.609	202.545
46	1.06812	0.21362	0.30518	1.7395	6.43921	10.437	11.2305	29.541	44.9219	59.0515	76.4465	120.88	164.581	196.472
46.5	1.77002	1.37329	1.12915	1.61743	6.43921	9.67407	16.5405	24.3225	34.3323	61.0962	64.8804	139.282	123.657	220.581
47	0.91553	1.58691	1.67847	1.89209	5.31006	11.1084	19.7449	30.2124	33.9966	70.8618	49.7437	146.728	132.477	226.166
47.5	1.25122	1.34277	1.12915	0.42725	5.12695	9.33838	18.8599	27.0996	32.2266	77.3315	57.9529	142.548	140.93	218.475
48	0.79346	0.79346	0.7019	1.80054	5.27954	9.73511	14.679	22.7356	34.1797	68.7561	61.676	146.088	157.135	214.233
48.5	1.12915	0.61035	0.36621	1.43433	4.18091	9.64355	14.0381	22.583	32.8369	70.9534	79.7119	142.822	169.556	213.593
49	1.09863	1.43433	0.94604	2.31934	3.20435	10.8337	13.7634	25.4211	35.8887	65.0329	80.3223	151.184	156.372	232.727
49.5	1.52588	1.15967	0.7019	1.58691	4.18091	11.3525	11.9324	25.4822	36.7126	65.2466	84.2285	156.494	127.441	235.687
50	0.45776	1.00708	0.54932	0.85449	4.54712	9.67407	14.0991	23.9868	33.3557	73.6084	90.6067	155.09	139.496	230.988
50.5	0.97656	1.52588	1.86157	1.67847	3.72314	9.88769	15.7165	26.1841	35.675	71.6553	86.9446	154.48	150.299	231.781
51	0.7019	1.5564	1.49536	2.71606	4.88281	9.70459	17.3035	22.3999	35.2783	72.5098	72.8149	173.401	162.598	239.502
51.5	1.00708	1.58691	1.89209	1.5564	5.40161	8.97217	13.8245	27.0691	39.2761	56.9763	86.6699	158.813	173.645	242.859
52	1.46484	0.88501	1.25122	1.95312	5.79834	9.52148	13.2446	17.4255	37.2009	72.5403	81.6955	163.696	163.208	231.201
52.5	1.67847	1.40381	2.22778	0.97656	6.46973	9.0332	16.3269	18.1274	46.4477	66.04	75.1953	160.767	150.726	229.523
53	0.67139	0.42725	1.83105	0.36621	4.54712	8.42285	16.2659	19.6228	44.0674	67.7795	65.155	160.828	151.794	228.668
53.5	1.37329	0.36621	1.67847	2.0752	3.72314	8.78906	21.8201	15.8386	49.2249	59.3872	74.585	153.717	139.374	235.138
54	0.88501	0.36621	0.94604	0.79346	5.18799	10.1623	19.5618	18.3105	46.5393	52.5818	89.4165	157.684	148.071	244.781
54.5	0.91553	0.57983	2.01416	2.0752	3.9978	10.0098	18.4326	17.395	47.8516	53.7109	79.9561	139.801	162.598	234.497
55	0.94604	0.06104	1.70898	2.04468	5.24902	9.46045	16.7541	19.2566	51.5137	49.2554	82.489	129.12	153.107	201.141
55.5	0.61035	0.7019	0.79346	1.0376	4.91333	7.96509	18.7378	24.8718	33.9661	66.4673	75.8057	120.789	152.466	188.629
56	0.85449	0.06104	0.82397	1.67847	3.66211	8.91113	18.6157	20.3552	33.1726	60.6995	74.7375	126.16	140.655	233.337
56.5	0.94604	-0.33569	0.64087	0	2.50244	9.67407	14.4348	21.4539	36.438	70.2209	75.4089	131.836	156.86	234.222
57	0.64087	0.42725	0.30518	0.30518	3.08228	8.05664	14.2212	18.0359	42.7246	70.4651	65.8874	136.475	146.973	213.776
57.5	-0.39673	1.00708	0.12207	0.5188	5.18799	9.88769	15.5029	19.989	43.7317	63.6292	91.0034	132.904	146.423	202.148
58	0.03052	0.18311	0.73242	0.57983	3.69263	8.39233	15.7165	24.0479	50.6592	60.6079	89.8132	154.968	156.921	216.248
58.5	-0.33569	-0.7019	0.64087	1.0376	3.57056	10.0708	15.8386	26.6418	47.6074	66.5283	95.7031	130.371	140.9	199.066
59	0.79346	-0.57983	0.39673	0.45776	3.96728	8.91113	17.7918	22.8882	41.7786	69.8852	94.1467	124.084	150.696	206.299
59.5	0.88501	0.42725	1.06812	1.15967	3.87573	6.95801	16.5405	19.5923	43.1213	68.5425	89.7217	122.925	166.351	210.937
60	0.33569	0.24414	1.64795	0.57983	5.64575	7.17163	15.1977	21.4539	50.0183	61.7065	89.0503	118.988	170.654	227.814
60.5	0.48828	0.48828	1.31226	0.54932	4.05884	7.69043	18.0969	23.2849	41.4124	61.1877	87.677	114.655	162.598	213.837
61	0.42725	0.36621	0.06104	1.0376	4.27246	9.94873	14.8621	20.7825	44.5251	66.6504	96.7102	114.41	157.837	202.118
61.5	0.39673	0.67139	0.79346	0.42725	5.15747	8.54492	16.4795	22.1252	42.6636	65.7043	93.5974	116.241	169.983	203.4
62	-0.12207	0.24414	1.15967	0.7019	4.82178	9.49097	17.8833	20.1721	36.1328	63.1103	81.665	128.387	172.76	196.045
62.5	0.76294	0.24414	0.73242	0.67139	4.15039	8.08716	18.7683	20.8435	41.8701	77.8503	83.2519	129.73	188.11	191.65
63	0.45776	0.18311	0.36621	1.25122	3.38745	10.5896	18.0969	21.2097	33.4778	72.5098	80.9021	126.587	165.894	218.872
63.5	0.42725	-0.27466	-0.42725	0.91553	4.05884	10.6201	17.0288	23.9258	28.7781	70.6482	76.2939	124.237	160.492	225.281
64	1.06812	0.21362	0.48828	2.13623	2.50244	7.93457	19.5923	29.9377	33.5083	70.1904	80.0476	106.72	160.004	205.048
64.5	0.67139	0.03052	1.00708	1.00708	3.69263	9.52148	16.4795	31.5857	44.0979	65.155	78.6743	116.547	152.252	202.82
65	1.09863	0.57983	0.33569	1.7395	3.17383	9.30786	17.7918	28.5034	38.0249	57.7698	73.9746	124.451	167.694	202.667
65.5	0.57983	0.30518	0.94604	-0.30518	4.36401	8.20923	19.0125	28.7476	31.1584	65.4297	80.5054	134.918	183.136	196.93
66	1.00708	0.42725	1.2207	0.5188	4.27246	7.53784	19.4397	24.8718	32.4707	61.7981	89.8132	112.671	182.434	213.287
66.5	0.42725	0.18311	1.83105	0.36621	5.82886	11.3831	21.9116	23.5901	35.3699	68.4204	96.1304	118.958	187.286	211.243
67	1.00708	0.97656	1.00708	1.28174	4.24194	12.0544	21.6064	26.0315	39.8254	71.8994	97.7783	133.179	182.709	196.289
67.5	1.37329	1.15967	0.36621	2.71606	5.06592	10.2539	18.219	23.2849	33.02	61.7371	102.661	140.747	182.129	200.867
68	2.34985	0.73242	1.67847	2.16675	4.27246	9.49097	15.8081	23.9868	40.6494	68.9392	89.2944	149.048	175.049	174.377
68.5	2.0752	0.64087	1.00708	2.01416	3.72314	9.33838	14.2822	29.3274	37.5366	60.5469	81.6345	130.035	169.678	187.164
69	1.92261	1.00708	1.49536	0.57983	3.96728	7.84302	13.4582	26.2451	39.0625	71.0754	81.5124	122.894	161.835	201.111
69.5	1.52588	1.61743	1.25122	0.73242	3.32642	8.36182	17.6697	26.062	37.4451	86.2732	81.8176	137.421	166.687	190.277
70	0.97656	0.91553	1.58691	0.03052	5.12695	7.62939	17.1204	25.7873	36.7737	69.1528	75.4089	129.333	180.176	188.721
70.5	1.09863	0.67139	1.31226	0.27466	3.66211	7.50732	16.0522	21.759	38.7573	71.5942	62.2559	125.031	178.619	192.108
71	1.12915	1.83105	1.52588	1.49536	3.23486	6.43921	14.1296	23.5901	48.4619	79.3762	57.2205	114.075	172.516	194.214
71.5	2.31934	1.25122	1.15967	0.42725	6.86645	6.40869	12.085	28.3508	56.4575	74.3103	64.3005	128.052	165.802	188.019
72	1.37329	1.2207	0.24414	0.18311	5.34058	9.49097	11.6882	26.2146	48.706	67.0166	66.0705	146.545	180.847	178.925
72.5	0.79346	0.64087	0.91553	0.79346	6.28662	10.1013	14.0686	25.2686	47.2107	62.8052	70.8008	130.737	189.056	214.6
73	1.19019	1.46484	0	-0.33569	5.52368	8.20923	15.6555	25.0855	48.584	64.27	68.8782	124.451	168.427	208.435
73.5	1.09863	0.5188	-0.7019	0.15259	3.23486	8.94165	15.3198	25.2686	35.3394	58.3801	64.6973	126.373	146.515	206.116
74	1.28174	0.5188	0.61035	0.48828	3.84521	9.3689	14.8315	30.1209	38.147	68.2678	76.1414	128.906	156.006	221.832
74.5	0.21362	0.30518	-0.09155	0.45776	4.15039	7.96509	13.2752	35.7361	42.4805	76.8738	81.1157	120.666	174.042	211.884
75	0.91553	0.42725	0.03052	-0.09155	3.2959	6.53076	15.2588	31.6467	40.6799	82.3975	80.4749	131.531	183.166	208.527
75.5	0	-0.15259	0.21362	0.21362	2.04468	12.2376	17.395	26.5198	43.4265	77.7893	79.1321	131.256	155.334	213.684
76	0.82397	0.48828	0.03052	0.64087	2.44141	11.9324	19.4397	20.1111	43.1824	78.4302	91.0339	134.033	159.79	193.603
76.5	0.91553	0.57983	0.30518	0.88501	3.32642	11.8713	17.0898	23.5596	44.9829	84.9609	83.1299	124.939	161.743	204.864
77	0.76294	0.67139	0.09155	0.97656	3.54004	11.7798	18.1885	23.9868	41.687	78.2776	83.5571	141.388	181.58	202.423
77.5	0.82397	0.30518	-0.57983	0.48828	4.76074	10.6506	18.4631	24.1699	36.2854	73.1506	88.3484	121.185	179.596	199.066
78	0.79346	0.24414	-0.06104	1.12915	4.91333	7.93457	16.1133	21.3928	37.2925	74.585	72.8454	128.601	197.357	196.381
78.5	0.82397	0.7019	-0.33569	0.42725	3.11279	7.59888	25.0244	27.8625	38.4827	75.6836	80.6579	121.582	184.998	213.715
79	0.97656	0.39673	-0.42725	1.49536	3.50952	11.2305	22.6135	21.7285	32.7454	72.5098	75.592	112.671	189.087	208.221
79.5	0.97656	1.09863	0.73242	1.43433	2.50244	10.4065	20.1721	22.5525	33.844	75.3479	82.3975	124.969	175.69	208.038
80	1.12915	0.82397	0.45776	0.79346	4.15039	11.1694	17.8223	22.583	41.9617	76.7517	76.0803	112.823	188.843	229.37
80.5	0.88501	0.61035	-0.27466	0.64087	5.27954	13.1531	17.3645	23.1934	44.0369	68.5425	83.5266	121.643	222.046	219.696
81	0.91553	0.30518	0.82397	0.21362	5.40161	10.2539	16.0217	24.2004	40.802	68.4814	84.0149	116.638	187.439	248.932
81.5	0.91553	0.54932	1.49536	0.64087	4.15039	9.73511	15.625	23.3154	37.7197	60.6384	90.21	119.781	194.58	247.62
82	1.5564	0.36621	0.15259	0.64087	4.63867	8.3313	15.8691	28.4119	38.4521	52.2156	80.78	106.628	180.756	247.559
82.5	1.52588	1.89209	0.57983	1.09863	2.89917	7.04956	13.3667	27.9846	40.2222	54.8706	83.6792	112.854	180.603	261.78
83	1.12915	0.7019	0.67139	1.15967	3.35693	5.88989	14.0076	32.4707	35.4004	66.5893	85.968	115.906	185.15	245.88
83.5	1.52588	0.5188	0.79346	0.54932	2.80762	7.1106	13.7329	24.3835	39.3677	72.8149	91.0644	128.51	207.092	230.53
84	2.0752	0.57983	0.57983	-0.24414	3.60107	7.35474	11.9324	27.4658	38.7878	80.1697	89.2944	128.876	204.59	212.799
84.5	0.82397	0.67139	0.7019	0.12207	3.11279	7.38525	11.6272	27.0081	41.3818	67.7795	85.4797	127.838	205.902	224.213
85	1.12915	1.12915	0.45776	0.91553	4.5166	8.20923	12.9395	23.5901	41.2903	61.3403	79.6204	111.969	183.258	238.739
85.5	1.34277	1.43433	0.76294	0.67139	5.40161	7.9956	11.5967	22.1252	41.3818	64.7278	79.7729	115.387	174.011	238.647
86	1.80054	0.91553	1.0376	1.19019	4.54712	7.78198	13.4277	30.6396	41.9312	65.5823	86.7004	120.178	157.44	222.351
86.5	1.37329	2.22778	1.31226	0.33569	4.18091	8.08716	13.031	31.0059	39.093	75.1343	71.6858	113.434	157.379	226.471
87	1.7395	0.97656	0.45776	1.25122	5.40161	8.97217	12.6648	33.4778	44.1589	68.3594	63.7207	127.411	170.563	226.227
87.5	1.2207	0.54932	0.36621	2.41089	4.3335	6.98852	12.5732	29.6936	44.1589	62.4695	61.5234	122.009	172.18	204.376
88	1.86157	0.09155	0.57983	4.48608	3.44849	7.59888	15.7776	28.0762	43.9758	71.0449	62.7747	100.891	179.047	235.87
88.5	0.88501	-0.21362	0.12207	2.62451	5.52368	7.14111	12.4512	27.2522	38.3911	71.106	60.0281	106.11	178.833	223.877
89	1.7395	0.45776	-0.54932	0.27466	5.34058	7.23267	9.85718	23.7732	35.4004	67.1387	71.3806	115.356	183.99	210.571
89.5	0.82397	0.5188	0.39673	-1.0376	3.84521	8.11767	11.0779	25.0549	44.0979	69.3359	85.7239	106.384	182.739	223.297
90	1.25122	0.09155	-1.09863	-0.03052	2.50244	5.43213	10.2539	26.7334	43.0603	59.9365	84.3811	126.19	182.007	227.692
90.5	1.06812	0.61035	0.06104	0.06104	1.95312	6.7749	9.33838	24.4141	39.7339	56.8848	75.0427	128.143	170.319	246.765
91	0.57983	0.12207	-0.03052	0.76294	2.71606	6.31714	13.4888	27.0081	37.6892	66.5893	79.7729	122.009	176.178	226.013
91.5	-0.18311	-0.06104	-0.15259	1.40381	1.46484	5.7373	13.7329	21.9116	35.7056	64.6362	68.4204	103.485	194.794	231.628
92	0.48828	0.48828	0.91553	1.61743	2.34985	6.40869	12.1765	27.8931	35.2478	61.0657	78.6438	109.222	194.214	218.597
92.5	0.64087	-0.03052	0	2.16675	2.89917	5.92041	14.0381	22.9797	37.4451	74.646	75.3479	120.27	196.899	233.093
93	0.48828	1.12915	0.27466	1.52588	2.65503	6.71387	13.3972	26.6113	42.9077	68.1763	83.4656	124.481	186.89	231.293
93.5	0.79346	0.12207	0.61035	0.88501	1.46484	7.90405	10.7117	22.0032	50.1404	67.3828	75.6836	128.693	175.964	233.246
94	0.57983	1.06812	-0.03052	2.56348	4.36401	6.89697	9.61304	22.7661	49.2859	60.5774	68.3594	131.287	160.187	198.303
94.5	0.64087	0.33569	0.88501	0.21362	3.54004	7.50732	10.8948	24.4141	51.6357	59.5703	78.4302	107.208	167.419	187.408
95	0.73242	0.18311	0.30518	0.09155	2.13623	11.5051	12.9395	27.8015	40.9546	56.5185	64.8804	120.148	155.457	220.764
95.5	0.15259	0.97656	0.54932	1.12915	2.86865	9.67407	12.6038	27.5574	39.154	46.7834	64.5752	134.094	193.97	204.59
96	0.85449	0.85449	0	2.47192	2.86865	10.0403	12.4207	22.9492	42.633	44.22	70.6177	118.378	184.692	193.42
96.5	0.15259	0	0.48828	1.46484	2.92969	8.69751	12.6343	20.7825	45.1355	41.3513	73.9746	116.943	175.14	198.456
97	0.94604	1.12915	0.88501	0.79346	2.38037	7.93457	12.7869	19.7143	45.5627	55.0842	70.5566	121.796	174.316	209.015
97.5	1.06812	0.33569	0.21362	0.12207	3.17383	6.68335	13.092	20.7825	49.9267	57.8003	63.1714	131.165	162.903	222.412
98	1.80054	0.91553	0.73242	0.36621	3.17383	6.28662	12.8479	20.6604	45.9595	48.6145	65.3686	124.054	177.521	200.958
98.5	1.40381	0.7019	0.54932	0.06104	5.06592	6.01196	9.46045	22.4609	50.3845	46.6919	63.2019	110.596	161.774	227.478
99	1.06812	0.85449	0.97656	0.94604	4.39453	6.74438	12.3291	20.1416	46.1426	52.3987	64.6667	113.098	146.484	233.459
99.5	1.49536	0.5188	0	0.45776	4.73022	7.53784	11.5051	19.2261	39.917	41.6565	72.9675	104.858	151.581	224.884
100	1.40381	0.54932	0.85449	0.06104	3.69263	9.552	11.9934	17.4255	40.2527	50.3235	64.6057	112.305	157.41	211.151
100.5	0.67139	0.5188	-0.09155	0.5188	6.01196	6.74438	10.8032	17.395	36.9263	49.3469	61.8896	112.488	162.079	231.567
101	0.82397	0	0.12207	0.94604	6.22559	6.95801	11.2915	15.1672	31.5552	53.894	70.6177	119.202	164.642	208.771
101.5	0.7019	1.00708	0.88501	2.74658	7.20215	7.23267	15.1672	19.6533	30.7922	54.9622	76.1108	129.15	180.786	201.141
102	1.28174	1.06812	0.73242	2.16675	5.40161	8.3313	14.1907	18.7683	33.4473	48.645	72.5098	148.071	188.354	208.527
102.5	1.77002	-0.03052	0.73242	2.41089	3.26538	9.46045	14.3433	24.3835	41.5649	49.9878	79.2847	161.926	204.498	218.506
103	1.67847	0.54932	1.46484	2.01416	4.11987	7.8125	13.031	25.0549	39.7949	51.8188	77.6977	135.376	207.611	228.851
103.5	1.15967	1.7395	0.48828	1.58691	5.00488	8.75854	10.437	20.9045	34.6985	48.584	78.8879	127.136	170.197	251.801
104	2.01416	0.39673	1.12915	1.58691	5.98144	6.98852	14.0686	24.0479	39.4592	52.6733	89.9963	117.554	183.838	246.124
104.5	1.19019	0.48828	0.39673	0.33569	5.40161	8.11767	15.3503	22.4915	44.3725	62.439	85.3577	133.667	173.248	221.863
105	2.01416	1.09863	0.27466	0.61035	3.38745	6.80542	17.1509	19.8059	41.1377	61.2488	78.6438	147.369	177.856	233.765
105.5	0.94604	0.67139	-0.03052	0.85449	3.17383	5.70679	16.4185	21.0266	31.5552	58.4412	86.2732	119.141	179.901	223.663
106	1.61743	0.33569	0.21362	-0.18311	1.95312	6.62231	17.7307	22.4609	42.0532	71.7468	82.3364	116.119	177.46	222.565
106.5	0.57983	0.73242	-0.18311	0.06104	4.54712	6.95801	14.9536	20.7825	42.8467	75.2563	82.7026	108.429	170.593	243.561
107	0.76294	0	-0.54932	0.15259	3.69263	10.4675	11.7798	20.3247	42.7246	71.5637	83.0688	125.061	171.997	257.721
107.5	1.31226	0.18311	0.30518	0.33569	2.80762	11.9324	11.2915	15.1672	43.5486	68.634	88.8367	130.676	149.384	246.216
108	1.61743	0.76294	0.18311	-0.03052	3.66211	12.7258	11.1999	24.353	35.8887	65.1245	90.2405	121.887	141.937	235.291
108.5	0.64087	0.18311	0	-0.42725	0.85449	11.4746	13.9771	24.5056	34.5154	54.5654	99.4873	113.098	152.1	233.154
109	1.89209	1.15967	0.67139	-0.27466	3.84521	9.21631	15.2588	24.6277	33.3557	64.6362	100.983	121.979	159.851	223.541
109.5	0.94604	1.09863	-0.30518	0.33569	2.9602	8.08716	17.273	19.8669	39.4287	74.0051	83.7402	109.283	148.346	242.401
110	1.19019	0.27466	0.57983	0	3.23486	7.35474	13.5803	21.4233	37.4756	79.5593	74.2798	117.279	142.395	248.901
110.5	2.92969	0.91553	0.91553	-0.03052	6.2561	6.68335	16.1438	21.2097	38.4521	82.8857	76.3245	100.372	150.513	244.843
111	0.36621	0.76294	-0.09155	-0.06104	4.60815	9.24683	16.8762	27.3438	38.9404	68.7561	76.7212	97.4731	165.466	228.729
111.5	0.39673	0.64087	-0.18311	1.15967	3.479	7.38525	11.6272	22.5525	46.9055	66.5893	87.4634	106.384	169.403	215.973
112	0.67139	0.76294	0.12207	0.7019	4.66919	7.8125	13.031	27.0996	44.5862	63.1714	75.8362	115.173	152.435	212.708
112.5	1.09863	0.73242	0.18311	0.33569	4.97436	9.09424	16.51	23.2239	35.614	70.9228	72.7539	111.237	176.849	212.891
113	1.83105	0.45776	-0.03052	0.7019	3.44849	7.01904	17.334	18.1274	29.3579	84.5947	93.1396	122.864	172.028	207.397
113.5	0.67139	0.88501	0.18311	1.92261	4.05884	6.56128	18.1885	17.5171	35.2173	83.9539	79.3762	118.103	162.415	216.064
114	0.39673	1.7395	1.15967	1.64795	3.32642	7.35474	17.395	24.4446	36.1938	78.6438	68.6951	113.342	162.262	253.204
114.5	0.39673	0.12207	0.67139	1.15967	3.05176	6.37817	13.8855	27.4353	39.5508	78.7048	71.1975	109.497	159.424	243.011
115	1.09863	0.61035	0.39673	0.45776	3.72314	6.95801	12.5427	28.4729	40.4663	67.7185	73.9136	110.474	194.061	242.737
115.5	1.0376	1.43433	0.27466	0.15259	2.89917	7.26318	10.8948	24.9939	45.2881	56.4575	85.5102	114.166	186.981	243.53
116	0.85449	1.77002	1.2207	0.97656	3.78418	8.75854	12.2376	23.407	47.2107	57.5562	85.1745	118.347	193.329	240.234
116.5	0.79346	1.12915	0.27466	0.36621	2.10571	9.12475	8.69751	24.5972	43.7317	65.8264	72.4487	128.204	188.751	236.267
117	0.94604	1.12915	0.94604	0.12207	2.34985	9.52148	12.0239	24.8108	36.3159	63.446	69.0613	132.172	169.159	224.792
117.5	1.52588	1.2207	0	0.18311	2.50244	10.7727	14.3433	26.5808	31.4026	67.8101	73.7915	113.525	180.328	230.469
118	1.19019	2.19727	0.73242	1.77002	2.16675	9.46045	15.7776	23.1323	30.8227	73.5779	62.9883	116.76	177.46	255.859
118.5	0.94604	1.0376	0.61035	1.00708	3.44849	8.11767	19.4702	20.3552	35.2783	80.0171	65.979	124.939	187.378	253.571
119	1.5564	0.97656	1.25122	0.7019	3.35693	7.59888	24.5972	22.8577	36.4075	74.4018	69.458	119.659	183.228	245.85
119.5	1.98364	0.79346	0.21362	1.00708	5.24902	8.42285	21.1487	25.6043	39.1235	80.5664	81.1157	121.094	181.824	241.76
120	1.92261	1.61743	1.49536	0.57983	4.21143	8.17871	18.2495	21.1792	29.0832	84.1675	77.4231	128.174	161.774	230.041
120.5	2.50244	0.82397	0.15259	0.85449	5.67627	7.53784	17.3645	23.468	29.6631	78.125	75.592	115.631	171.051	240.662
121	1.25122	0.61035	1.19019	0.73242	4.63867	10.0403	24.5972	23.9868	33.4778	69.4275	76.0498	102.692	165.985	234.955
121.5	0.64087	1.67847	0.82397	0.06104	3.17383	8.3313	17.3035	25.6348	34.7595	47.9126	79.5593	97.5342	181.824	221.283
122	1.49536	0.45776	0.09155	0.09155	3.05176	5.98144	15.7776	24.353	36.8347	55.2368	79.4678	106.11	177.795	242.31
122.5	1.37329	0.57983	0.5188	0.21362	3.2959	6.71387	14.5569	19.5923	33.6609	62.6526	83.0383	108.307	180.572	229.431
123	1.15967	0.33569	0.85449	0.39673	2.89917	8.5144	17.7612	17.9443	29.4495	60.1196	90.7593	124.664	168.182	245.605
123.5	1.5564	0	0.03052	1.09863	2.19727	6.5918	19.1345	21.3928	39.8865	65.6738	78.8879	127.93	178.162	226.44
124	1.06812	0.18311	-0.5188	1.06812	3.23486	6.89697	17.3035	28.9917	34.6069	79.895	65.2771	127.563	168.243	200.806
124.5	0.97656	-0.67139	-0.36621	0.39673	3.41797	6.40869	14.2212	25.3296	36.8957	81.8481	71.2891	127.777	152.802	212.494
125	1.15967	-0.88501	-0.21362	1.00708	1.89209	7.2937	17.395	27.3743	34.9121	85.0525	69.5495	120.239	143.25	207.489
125.5	0.48828	-0.12207	0.06104	1.86157	4.3335	8.48389	14.4043	25.116	34.6069	72.6624	72.876	104.279	174.652	214.478
126	0.85449	-0.09155	0.06104	0.85449	2.89917	10.2844	14.0076	30.2429	42.7246	59.2957	79.3152	122.589	174.469	214.813
126.5	1.06812	0	0.12207	-0.15259	3.50952	8.94165	13.3667	23.1628	44.1284	54.779	82.9163	142.944	179.596	238.617
127	0.09155	0.85449	0	-0.45776	3.05176	8.36182	17.6392	31.6772	39.8865	51.3611	84.4727	132.202	183.777	244.873
127.5	1.34277	0	-0.18311	-0.33569	1.89209	9.00268	14.2212	26.2146	37.8418	50.415	78.1555	119.049	200.897	243.958
128	0.54932	-0.06104	-0.7019	-0.54932	1.40381	7.8125	13.0615	25.0549	33.02	50.5066	71.991	107.422	208.038	237.427
128.5	1.37329	0.61035	0.39673	-0.09155	2.38037	5.82886	17.7918	30.0293	37.3535	60.3027	82.5195	105.225	214.081	238.586
129	1.00708	0.76294	-0.12207	-0.09155	2.59399	7.50732	19.5007	28.9917	34.0271	61.0657	71.5942	99.4873	235.26	259.094
129.5	1.00708	-0.18311	0.18311	1.70898	2.71606	7.38525	17.6697	30.2429	37.9333	65.8874	66.2536	115.204	214.05	241.821
130	0.76294	0.15259	0.67139	0.33569	4.05884	8.81958	17.9138	28.6865	40.4358	71.7468	72.9065	101.257	217.133	248.23
130.5	0.82397	0.06104	-0.06104	0.42725	4.27246	8.72803	23.3154	32.0129	37.9333	74.7375	76.6602	110.535	206.909	245.331
131	0.36621	0.5188	0.64087	0.67139	5.21851	8.14819	18.0664	25.6348	38.2996	76.355	76.9348	120.819	188.324	249.695
131.5	0.64087	-0.15259	0.5188	1.19019	2.2583	8.8501	13.4277	21.7895	34.2407	73.3948	76.4465	133.545	187.408	229.218
132	1.5564	0.73242	0.61035	0.54932	2.31934	10.1623	15.9607	28.9917	38.147	69.4885	80.1086	145.996	190.826	234.222
132.5	1.58691	0.82397	-0.30518	0.42725	4.91333	8.36182	17.1204	28.6865	37.5061	68.512	71.0449	153.473	168.121	257.324
133	0.85449	0	-0.33569	0.79346	3.93677	6.22559	19.104	30.8533	31.8604	64.9109	67.9932	131.805	160.736	236.267
133.5	0.79346	1.25122	-0.12207	2.34985	3.96728	8.39233	20.5994	25.238	33.7219	68.6951	78.125	130.829	171.997	231.171
134	1.40381	0.48828	-0.33569	0.97656	5.34058	7.56836	25.177	27.0691	31.7688	70.6177	76.0193	134.583	180.176	243.164
134.5	1.12915	0.85449	0.79346	1.28174	3.96728	10.2234	19.5923	23.0713	38.208	57.251	79.7119	134.155	173.859	241.699
135	2.0752	0.57983	0.73242	2.10571	4.54712	10.498	19.989	20.9045	43.2434	58.6853	71.1975	131.561	187.592	216.736
135.5	1.19019	0.82397	0.21362	2.59399	1.95312	12.9089	24.5056	22.3999	47.9736	47.5159	68.634	124.115	184.631	228.729
136	1.28174	0.33569	-0.15259	2.65503	3.17383	10.6812	20.9961	22.4915	43.0908	45.6543	65.6738	106.964	170.776	200.378
136.5	0.48828	0.21362	1.12915	1.43433	3.44849	8.30078	20.4468	21.5454	31.4026	56.3965	54.5654	113.647	156.403	223.816
137	1.31226	0.61035	0.85449	0.82397	3.9978	8.88061	15.5335	17.1509	29.6326	56.427	66.7419	96.405	178.162	210.083
137.5	0.91553	0.48828	0.82397	0.76294	3.84521	9.30786	18.0359	22.644	30.8838	60.1196	74.646	106.476	169.22	226.562
138	0.54932	0.33569	1.06812	1.43433	2.28882	9.88769	12.6038	25.0549	32.0129	54.4739	79.0405	96.0999	156.372	236.389
138.5	0.39673	0.39673	-0.27466	0.24414	2.0752	7.01904	10.1929	22.644	28.6255	59.6619	86.2121	105.072	161.987	254.883
139	0.5188	0.09155	-0.82397	1.58691	1.64795	6.5918	9.76562	27.9541	24.8108	64.6667	84.8389	106.903	146.942	226.898
139.5	0.36621	0.18311	0.27466	0.94604	2.41089	5.92041	10.2844	27.0691	26.6113	69.2444	88.7146	117.828	158.905	240.631
140	1.0376	0.42725	-0.54932	0.54932	2.13623	5.64575	9.06372	22.9187	30.6396	60.3638	88.9892	125.031	149.048	238.953
140.5	0.67139	0.15259	0.33569	-0.06104	2.86865	10.1929	10.8032	21.5149	31.25	49.408	90.8508	144.867	152.008	244.72
141	1.09863	0.57983	-0.61035	0.7019	2.44141	9.06372	12.146	28.595	40.6799	49.4995	90.6982	122.864	162.628	249.725
141.5	0.24414	0.15259	-0.85449	0	1.95312	8.81958	10.1623	31.7383	39.0625	50.5066	87.5549	122.589	148.437	248.596
142	-0.03052	-0.36621	-0.5188	-0.06104	5.15747	8.05664	12.2376	32.9285	39.0625	58.6853	82.2449	130.859	159.607	259.582
142.5	0.7019	0.09155	0.18311	-0.03052	5.79834	11.2915	14.6484	28.0456	34.4543	50.5066	80.5054	134.918	170.319	243.042
143	0.82397	0.7019	0.18311	-0.30518	5.12695	9.85718	12.085	32.9285	34.2407	59.6313	78.8879	119.476	161.041	224.976
143.5	0.54932	0.09155	0.06104	0.24414	1.98364	9.09424	12.9395	26.825	39.7644	62.9272	88.9587	124.756	166.229	236.145
144	0.79346	0.61035	-0.12207	0	4.48608	7.23267	13.3972	25.6653	33.7524	57.9834	78.4607	121.918	158.325	254.12
144.5	0.7019	0	0.24414	0.48828	2.56348	6.80542	14.7705	23.7427	40.6494	60.2722	86.7615	137.146	150.574	244.293
145	0.27466	0.15259	-1.19019	-0.64087	3.41797	5.79834	14.4348	22.0642	45.4102	75.8667	88.623	155.914	152.252	247.986
145.5	1.15967	0.45776	-0.76294	0	2.80762	8.30078	14.6484	22.3694	42.8772	79.071	84.8083	148.407	188.019	251.282
146	0.76294	0.91553	-0.54932	0.18311	3.78418	8.5144	13.6719	20.6909	43.1824	73.4253	84.5337	127.258	190.521	235.229
146.5	1.0376	0.7019	-0.21362	0.39673	5.34058	5.92041	10.8948	20.4163	50.2625	66.4673	80.78	109.467	191.437	224.365
147	0.76294	-0.33569	-0.21362	0.24414	6.68335	6.43921	13.6719	18.4936	44.6167	59.1736	83.7402	112.091	186.615	233.429
147.5	0.39673	0.39673	0.12207	0.67139	5.15747	8.63647	12.8784	22.2168	48.4009	58.136	94.7876	124.084	190.369	221.954
148	0.76294	0.42725	0.09155	0.39673	3.479	7.90405	14.1602	26.3977	49.2249	53.6499	94.0246	107.971	200.867	214.661
148.5	1.00708	0.21362	-0.27466	0.24414	2.10571	7.04956	13.4277	22.522	48.6145	61.7676	82.5195	123.932	202.209	229.004
149	0.91553	-0.24414	-0.03052	0.09155	1.86157	6.98852	14.4959	14.8621	53.4668	65.4602	73.6694	116.15	202.82	238.8
149.5	1.0376	0.48828	0.06104	-0.27466	2.10571	6.86645	14.0076	21.0571	46.5088	59.7839	72.5403	112.335	184.265	228.485
150	0.61035	0.24414	-0.06104	0.5188	2.80762	6.56128	15.2283	21.3013	51.5747	54.3823	82.6416	111.725	182.648	226.257
150.5	0.82397	0.18311	0.85449	-0.42725	2.92969	9.64355	15.3809	26.2756	46.7224	46.0815	106.628	115.723	179.657	237.366
151	0.57983	0.97656	0.27466	0.09155	7.32422	7.84302	17.9443	26.123	49.6826	49.8657	95.1538	137.604	195.129	228.241
151.5	1.58691	1.61743	0	0.33569	4.15039	6.74438	16.3269	20.1721	42.3279	64.3311	97.8088	143.585	195.648	206.818
152	0.64087	0.57983	0.57983	0	4.97436	7.01904	16.6626	23.3765	45.0745	65.5212	97.6868	139.923	169.861	226.044
152.5	0.61035	2.28882	1.28174	-0.03052	3.14331	10.1318	15.0452	22.7661	43.335	73.761	87.2803	119.965	188.568	218.292
153	1.98364	0.33569	0.36621	0.18311	4.94385	9.15527	12.8479	25.2686	39.1846	75.9888	103.577	128.021	178.009	220.398
153.5	1.95312	0.48828	0.57983	0	4.5166	7.50732	19.5007	31.1584	38.7268	73.9746	105.499	115.204	176.361	209.137
154	1.61743	0.39673	-0.09155	-0.57983	4.54712	8.27026	18.5852	24.1699	44.2505	61.3098	99.3042	110.352	169.952	225.098
154.5	1.06812	0.97656	0.36621	1.49536	3.8147	8.48389	16.7236	21.3928	47.5769	59.6924	89.8132	101.532	182.678	216.034
155	1.09863	0.48828	1.5564	1.12915	3.87573	8.23975	17.0898	18.6157	51.6052	69.458	89.9048	114.594	184.235	209.93
155.5	1.09863	-0.18311	0.67139	1.15967	5.12695	6.74438	22.9797	18.8293	53.0701	68.3289	88.0432	111.725	179.932	234.344
156	0.73242	0	-0.03052	0.48828	3.96728	8.45337	19.8669	27.4048	50.9033	68.0847	97.4121	111.481	186.798	239.136
156.5	0.12207	0.30518	0.24414	0.27466	3.63159	7.9956	21.3928	28.595	39.7644	62.9578	100.83	104.34	177.277	229.095
157	-0.24414	-0.12207	0.12207	-0.33569	4.94385	5.61523	25.238	18.2495	40.4968	54.779	92.804	112.244	164.917	231.567
157.5	0.88501	-0.06104	0.24414	0.18311	5.5542	6.46973	21.2707	16.2354	45.2881	55.8472	77.5452	112.732	178.986	215.82
158	0.61035	-0.21362	0.15259	-0.48828	4.85229	7.56836	22.0032	25.7263	37.0178	74.9817	85.7544	98.6328	183.777	202.881
158.5	0.09155	-0.54932	-1.46484	-0.30518	3.05176	7.8125	18.8599	26.5503	38.6047	69.2749	78.3691	100.25	165.009	204.254
159	0.54932	0.15259	-0.85449	-0.21362	2.62451	7.59888	18.7073	29.1748	46.6003	65.6738	74.1272	95.2759	181.885	233.215
159.5	-0.21362	0.18311	0.30518	0.27466	2.41089	7.78198	23.468	27.9541	35.9497	73.9441	84.7778	92.926	192.078	261.566
160	1.28174	0.61035	0	0.85449	2.34985	8.66699	19.0125	28.3203	31.1279	72.3572	76.6296	89.386	212.036	236.969
160.5	0.67139	0.03052	0.27466	0.5188	1.98364	6.68335	20.4468	30.8838	33.4473	76.7517	92.2241	97.0459	194.336	243.622
161	0.03052	-0.36621	-0.15259	-1.19019	3.32642	8.20923	17.395	29.5715	30.7312	70.4956	109.558	120.789	194.58	235.321
161.5	0.18311	0	0	-0.30518	3.78418	7.2937	15.7471	26.3061	32.7454	73.3032	100.281	128.601	197.235	237.335
162	0.57983	0.54932	0.42725	0.94604	3.96728	10.1013	15.1367	30.2124	40.802	69.9768	92.3767	132.385	186.829	261.749
162.5	0.54932	-0.03052	-0.03052	0.33569	4.5166	7.44629	16.1438	28.5034	45.6238	71.167	95.4895	125.336	175.598	236.694
163	1.0376	0.06104	0.15259	0.54932	2.9602	7.87353	16.2048	27.7405	38.2996	72.4487	97.6562	111.694	191.956	214.722
163.5	0.97656	-0.09155	0.97656	0.03052	3.8147	6.22559	14.0076	23.8342	37.9944	68.634	93.7805	97.3816	211.548	210.236
164	0.27466	0.45776	0.21362	0.12207	5.21851	11.0474	15.2283	22.7051	28.7476	74.1272	91.8274	118.073	195.648	231.842
164.5	0.82397	0.82397	0.97656	-0.42725	5.43213	11.9324	14.3738	20.6604	28.8086	78.7048	69.1833	111.481	196.045	208.679
165	1.28174	0.42725	-0.09155	-0.45776	7.69043	10.498	12.2986	25.7873	25.3906	62.4084	75.5615	116.425	186.829	197.418
165.5	0.79346	0.36621	0.57983	-0.82397	7.65991	9.15527	13.2752	25.3296	27.8015	55.6335	77.5146	128.754	167.053	192.078
166	2.13623	0.61035	-0.15259	-0.42725	5.0354	11.0779	10.2539	20.4773	26.825	53.5889	94.4214	115.417	192.505	188.599
166.5	1.00708	0.7019	0.24414	0.5188	4.30298	7.47681	11.7188	23.8037	35.5835	49.5605	81.4514	118.927	210.541	199.585
167	0.76294	0.03052	0.82397	0	3.05176	10.5286	10.8948	15.8997	38.3606	56.1218	77.9724	113.342	219.788	219.727
167.5	1.2207	0.94604	0.30518	1.46484	4.69971	9.70459	10.5286	18.158	34.1797	65.3381	82.2143	120.85	214.935	225.647
168	0.30518	0.97656	0.61035	0.15259	2.80762	11.9934	11.9629	17.273	44.281	54.6875	74.2798	115.845	216.4	220.062
168.5	1.67847	1.95312	-0.33569	0.79346	3.44849	7.14111	17.7918	23.5596	44.0674	59.4788	75.9277	123.596	217.743	219.025
169	1.37329	1.37329	0.64087	-0.03052	4.48608	8.36182	16.4795	25.9399	45.0439	50.2014	63.7817	112.762	220.184	216.156
169.5	2.10571	1.06812	0.7019	1.19019	3.72314	8.45337	14.5874	30.2734	45.1965	61.4319	58.136	109.253	208.984	211.487
170	1.2207	0.18311	0.91553	0.57983	3.14331	8.60596	14.1907	30.426	47.9431	62.1033	64.8499	120.666	198.303	191.65
170.5	1.00708	0.15259	0.54932	1.0376	2.71606	6.5918	17.3645	23.3765	45.9595	67.9626	68.1763	130.188	200.623	205.109
171	0.73242	1.09863	0.09155	-0.54932	3.57056	7.8125	14.8315	28.1067	51.3611	70.1904	76.355	132.568	172.058	194.763
171.5	1.06812	0.24414	0.21362	0.09155	2.62451	7.75146	16.8152	28.1067	51.0864	68.5425	96.9849	118.774	169.403	196.533
172	1.58691	0.30518	-0.21362	-1.00708	1.64795	9.00268	12.4512	18.1885	52.0935	73.822	100.769	136.993	161.499	203.674
172.5	0.36621	-0.18311	-0.15259	0.88501	2.31934	7.44629	13.2446	16.7541	48.706	73.8525	94.6655	123.505	155.914	208.71
173	0.36621	0.45776	-0.39673	-0.24414	2.16675	7.53784	10.437	17.8528	52.7954	66.0095	90.2405	117.493	186.249	203.217
173.5	0.85449	0.06104	-0.36621	1.49536	1.89209	6.56128	11.8713	20.4773	44.5862	68.3899	92.4377	119.843	175.598	198.669
174	0.82397	0.88501	-0.09155	1.86157	1.92261	7.44629	14.3433	23.468	39.917	68.9087	102.936	125.793	184.662	230.286
174.5	1.06812	0.30518	-1.49536	0.57983	0.97656	8.17871	13.7329	15.9912	37.2009	63.6902	105.652	124.207	180.695	225.433
175	-0.12207	0.15259	-1.67847	-0.12207	1.28174	5.37109	12.97	17.273	35.8887	65.2466	111.053	137.329	181.519	210.754
175.5	0.12207	0.48828	-1.19019	-0.36621	1.83105	7.20215	11.0168	17.7612	36.56	58.136	99.5483	133.026	171.387	222.839
176	0.42725	-0.18311	-0.12207	-0.24414	1.98364	5.40161	10.2844	17.0593	35.4919	68.6645	104.858	130.798	195.74	228.577
176.5	1.00708	-0.33569	-0.5188	0.12207	1.86157	8.11767	13.2446	18.4631	33.9355	70.6482	110.291	129.547	180.847	232.361
177	0.54932	-2.7771	-0.18311	-0.45776	2.53296	7.41577	12.3596	21.3013	38.7573	70.0683	75.7751	138.855	178.436	215.942
177.5	0.54932	-2.34985	0.79346	0.21362	2.04468	8.8501	13.3972	21.6675	32.9895	61.1267	77.5757	134.46	164.276	197.968
178	0.03052	-0.61035	0	-0.03052	1.49536	11.4136	14.3127	20.4163	38.8184	56.488	96.1609	109.772	172.394	210.114
178.5	0.21362	-0.15259	0.85449	1.12915	1.98364	11.9324	10.8643	25.6348	39.8865	49.8962	95.6726	114.136	167.572	207.703
179	0.73242	-0.30518	0.36621	0.39673	2.2583	13.7329	14.8621	24.231	34.4849	62.561	109.436	108.307	162.476	209.747
179.5	0.18311	0.15259	-0.06104	1.19019	2.71606	8.17871	14.3127	17.8528	36.5295	68.573	101.837	114.99	143.341	195.404
180	0.94604	-0.67139	0.45776	0.64087	3.32642	9.58252	12.2376	14.2517	33.783	57.0679	93.9941	128.876	161.194	203.217
180.5	0.39673	0.39673	0.06104	0.45776	3.23486	9.58252	9.67407	15.9912	29.3884	68.3899	85.7239	114.807	157.257	182.373
181	0.91553	-0.03052	0.88501	1.58691	2.47192	11.8408	11.4136	24.2004	37.8418	67.3218	101.318	128.021	151.276	194.183
181.5	0.64087	0.09155	1.0376	0.73242	1.80054	9.58252	11.9324	25.8789	46.5088	78.7659	99.3652	114.746	156.403	219.757
182	0.45776	0.79346	-0.06104	-0.09155	1.89209	11.1084	12.146	17.7918	45.8374	73.5168	86.7004	136.658	160.004	224.091
182.5	1.28174	0.24414	0.09155	-0.73242	4.30298	9.09424	11.0474	18.4631	46.7834	70.0683	80.5969	148.834	165.497	219.635
183	1.15967	0.61035	-0.09155	0.57983	3.11279	9.94873	15.2893	20.7825	43.7622	64.1785	81.0547	142.609	166.168	216.888
183.5	0.94604	0.36621	-0.30518	0.54932	1.86157	9.46045	13.1226	22.2168	42.0532	48.0957	96.7407	128.937	169.922	221.863
184	0.73242	0.36621	1.12915	-0.33569	2.74658	8.57544	15.0146	23.3154	37.2925	58.8074	90.21	136.627	180.481	217.499
184.5	1.19019	1.25122	1.06812	1.2207	2.65503	6.073	13.6108	18.7378	38.7268	61.8286	86.6089	144.714	177.582	208.374
185	1.46484	1.09863	0.79346	0.42725	2.74658	7.87353	11.1694	23.7427	33.2947	62.6221	89.7827	133.667	170.685	218.17
185.5	1.70898	0.45776	1.67847	-0.09155	2.56348	8.57544	14.5264	17.6392	42.8772	66.4368	104.156	133.453	170.38	202.789
186	1.67847	0.57983	0.67139	0.91553	4.39453	14.0076	12.5122	15.4114	42.3279	61.0046	91.156	114.044	171.967	203.827
186.5	1.83105	0.64087	-0.57983	0.09155	2.80762	14.1602	11.4441	17.7002	30.0598	68.6645	84.6557	105.347	153.107	197.723
187	0.7019	-0.12207	0.45776	1.2207	2.80762	9.58252	10.6506	14.2517	36.5906	66.8945	103.363	110.962	142.7	203.552
187.5	1.5564	0.76294	0.79346	0.57983	3.93677	13.3057	8.42285	15.0146	35.9192	67.5964	116.211	136.993	154.144	217.133
188	1.09863	0.67139	-0.64087	0.67139	5.70679	11.5051	11.9324	18.8599	31.3721	71.4722	118.958	106.445	163.849	213.623
188.5	0.97656	0	-0.12207	0.97656	2.28882	11.0779	15.2283	20.6604	33.2642	52.3376	122.711	113.19	156.311	212.036
189	0.54932	-0.27466	-0.61035	0.67139	1.83105	10.4065	15.9607	25.8484	33.4778	57.1899	114.594	121.918	162.842	212.463
189.5	0.85449	-0.48828	-0.27466	-0.09155	4.60815	8.39233	15.5335	20.5689	39.5813	62.8357	115.417	124.756	182.281	211.365
190	1.06812	0.5188	0.12207	-0.03052	3.57056	6.43921	12.1155	20.2026	35.3699	53.3752	121.674	147.736	180.908	237.518
190.5	1.0376	-0.21362	0.42725	1.37329	1.46484	6.13403	11.2305	18.0969	37.323	55.1758	123.505	148.01	177.917	234.192
191	1.00708	-0.45776	-1.25122	-0.09155	1.58691	5.7373	8.20923	31.6772	35.553	57.8918	113.678	137.787	166.412	236.877
191.5	0.15259	-0.7019	-1.09863	0.79346	2.10571	7.23267	9.24683	31.7383	37.0789	70.0989	102.844	132.538	170.502	219.513
192	-0.48828	0.03052	-0.94604	0.09155	3.02124	8.08716	9.58252	30.2429	43.1519	68.4509	99.0295	123.138	171.448	239.075
192.5	0.76294	0.18311	-0.61035	-0.61035	3.02124	5.92041	11.9934	21.1182	45.7458	66.5283	102.905	105.041	164.124	220.886
193	0.15259	0.03052	0.12207	-0.67139	2.47192	6.34766	12.6953	23.7732	48.0042	64.4531	94.7571	122.162	184.174	214.264
193.5	1.34277	0.30518	0.30518	-0.03052	1.95312	9.0332	11.0474	24.6277	49.1638	64.209	99.4263	128.51	186.31	211.517
194	1.15967	0.09155	0.54932	0.61035	2.9602	8.72803	11.8103	25.0549	43.396	68.6951	90.3931	128.54	178.833	211.456
194.5	0.79346	-0.12207	-0.18311	0.30518	3.35693	9.21631	12.5732	23.0102	38.5437	59.7229	91.6138	132.446	174.622	241.577
195	0.64087	0.03052	-0.12207	0.12207	4.73022	9.552	9.15527	16.6016	35.2478	66.5588	98.3581	132.355	186.279	252.716
195.5	0.21362	-0.03052	-0.27466	0.12207	3.02124	8.72803	11.1694	19.9585	40.0085	73.4253	101.746	145.172	179.169	227.447
196	-0.09155	0	-0.64087	1.00708	4.5166	8.23975	13.7024	20.1111	33.905	76.8432	108.398	159.18	187.469	227.02
196.5	0.54932	0.18311	-0.76294	0.91553	3.41797	7.9956	12.4207	22.2473	42.3889	69.2749	115.021	133.728	186.31	256.317
197	0.48828	0.73242	-2.22778	0.91553	5.85937	6.46973	14.0381	27.3132	43.3655	62.7441	100.708	142.364	163.971	221.1
197.5	-0.30518	0.24414	-1.34277	1.31226	4.08935	7.72095	12.4817	21.7895	48.5535	59.6619	101.257	164.276	164.215	224.915
198	-0.30518	0.33569	-0.76294	1.83105	2.44141	7.1106	13.6414	21.2402	40.5273	62.4084	91.2476	150.909	172.241	234.802
198.5	-0.45776	0.7019	-1.0376	1.43433	1.67847	8.17871	11.8713	27.2522	50.1709	66.04	98.6633	148.132	179.352	216.766
199	0.61035	0.18311	-1.25122	-0.18311	2.22778	9.88769	9.94873	24.353	45.6543	69.6716	88.2568	141.815	178.406	201.691
199.5	0.15259	-0.12207	-1.34277	1.98364	2.53296	9.06372	10.376	22.1863	39.9475	77.2095	95.0012	128.265	178.772	222.076
200	0.67139	0.88501	-0.82397	0.45776	2.31934	9.12475	10.3455	17.5781	34.4849	72.3267	99.7009	136.139	182.709	210.754
200.5	0.15259	0.54932	-1.58691	0.88501	3.08228	9.67407	11.2305	19.5618	49.2554	85.8459	98.2971	130.676	168.243	206.146
201	0.24414	0.79346	-1.19019	0.33569	4.30298	8.75854	15.0452	21.3013	49.7131	104.614	86.792	115.997	175.293	204.834
201.5	1.5564	1.64795	0.42725	0.5188	4.27246	7.65991	16.0828	23.2849	47.1802	90.9424	95.4895	136.81	159.393	200.684
202	1.64795	0.09155	-1.19019	0.7019	5.34058	7.14111	15.8691	20.2331	28.4729	85.083	86.5478	134.918	190.338	229.431
202.5	-0.24414	0.18311	-1.09863	1.92261	2.89917	7.47681	16.6321	17.395	34.6375	93.2312	88.3484	123.779	190.674	222.015
203	0.18311	0.5188	-0.7019	2.41089	2.22778	8.75854	15.4114	18.0359	42.7856	88.6841	98.6023	115.356	194.489	228.485
203.5	1.15967	0.48828	-1.34277	0.97656	2.47192	9.58252	16.6626	19.7143	50.354	80.719	95.5505	126.678	188.568	247.131
204	-0.5188	0.54932	-1.00708	0.7019	3.23486	9.27734	18.1885	20.05	48.3704	75.6531	98.7854	115.509	195.709	245.941
204.5	0	0.36621	-1.52588	1.83105	2.68555	6.71387	17.1814	22.7356	41.1072	67.6575	99.6399	122.101	181.671	246.826
205	-0.48828	-0.39673	-0.88501	1.2207	3.41797	4.88281	13.3057	21.0571	39.6728	70.7397	105.499	123.84	205.902	223.145
205.5	-0.42725	-0.7019	-1.67847	1.77002	3.72314	4.69971	17.4255	18.3716	35.675	61.1267	95.3979	124.054	189.545	219.238
206	-0.82397	0.27466	-1.89209	2.22778	3.75366	5.0354	18.6462	19.5923	35.7056	76.3855	99.9451	136.108	181.915	236.816
206.5	-0.64087	1.00708	-1.49536	1.09863	2.68555	7.41577	14.6484	23.1934	33.0505	75.1953	102.234	131.531	195.953	220.459
207	-1.52588	0	-1.83105	0.27466	3.11279	7.08008	14.7095	19.9585	41.0156	72.998	109.619	149.963	194.672	220.184
207.5	-0.76294	0.15259	-1.12915	0.5188	2.9602	7.38525	15.5945	20.2331	47.7295	72.6013	95.8557	152.252	208.13	218.933
208	-0.88501	-0.48828	-1.00708	-0.48828	1.77002	7.04956	12.4512	21.0571	47.8821	77.362	87.7686	168.06	215.393	229.828
208.5	-0.73242	-0.61035	-1.67847	0.24414	4.36401	7.59888	14.9231	22.1252	39.6728	75.8972	74.3408	140.686	204.315	236.664
209	0.39673	-0.15259	-0.76294	2.47192	2.65503	6.04248	18.0664	23.3459	31.7383	75.2563	93.6584	133.057	199.432	245.88
209.5	-0.97656	-0.48828	0.09155	0.54932	2.31934	4.66919	16.571	23.0408	38.7878	71.5637	90.4541	139.435	200.165	243.927
210	-0.21362	0.30518	-0.82397	0.30518	2.7771	5.09644	14.5264	25.0244	39.2761	64.7888	93.9026	119.537	195.099	235.077
210.5	0.27466	-0.12207	-0.97656	0	2.0752	5.79834	11.8408	17.4561	40.863	63.9038	103.394	137.36	172.15	223.816
211	-0.12207	0.06104	-0.54932	-0.24414	2.80762	5.18799	12.3596	29.3884	41.0461	58.7463	102.356	139.13	177.002	224.487
211.5	0.03052	-0.45776	-0.94604	-0.57983	2.22778	5.37109	12.97	25.8789	44.7998	74.4934	101.013	135.956	193.054	216.248
212	-0.06104	0.03052	-0.09155	-0.7019	3.8147	6.22559	11.6882	20.874	51.6968	70.2515	113.77	136.688	184.753	202.545
212.5	0.15259	0.30518	-0.7019	0.39673	1.95312	5.98144	10.376	18.4326	51.7883	72.2656	96.8017	145.416	205.231	215.851
213	-0.48828	-0.39673	-0.61035	1.77002	5.00488	7.2937	11.0474	15.686	48.8281	78.6438	89.9658	149.078	195.374	241.608
213.5	0.03052	0.39673	-1.61743	0.30518	3.32642	7.1106	14.1907	15.9912	52.4292	71.2585	99.2432	143.494	188.843	257.782
214	0.94604	0.54932	-0.97656	0.64087	1.98364	8.63647	14.4653	21.2402	42.3279	65.8874	99.3042	139.557	200.897	243.134
214.5	-0.5188	0.5188	-1.15967	0.33569	4.97436	6.95801	12.7869	27.7405	45.6543	67.3828	104.675	147.034	193.115	239.532
215	1.06812	0.27466	-0.18311	-0.36621	4.42505	11.5967	10.8032	24.2615	47.2717	73.7915	77.2095	150.421	190.063	250.702
215.5	0.5188	0.79346	0.03052	0.48828	2.2583	7.90405	13.1226	25.1465	48.9807	63.4766	79.1016	139.221	194.336	250
216	0.73242	1.06812	0.30518	0	1.7395	9.00268	13.3667	25.0549	36.6516	59.2957	86.4258	145.05	224.64	252.289
216.5	0	0.21362	-0.39673	0.39673	2.65503	10.5896	12.1765	25.6043	39.1235	65.6738	92.3462	158.6	192.81	258.82
217	0.03052	0.54932	-0.03052	1.98364	3.05176	11.8713	13.5193	22.7051	41.1072	77.7588	91.7358	160.217	193.512	254.791
217.5	0.21362	0.88501	0.33569	0.91553	2.16675	12.6038	9.42993	19.3176	33.2642	83.5266	85.4187	120.972	191.467	229.126
218	1.09863	0.79346	1.25122	0.85449	2.86865	11.261	10.8643	23.6816	35.3394	74.8596	81.1462	146.027	185.211	224.213
218.5	0	1.5564	0	1.80054	2.74658	11.6882	11.6577	20.5383	37.6892	59.2346	78.6133	157.776	198.914	216.98
219	0.5188	1.77002	0.03052	1.43433	5.46265	7.26318	14.1907	20.3552	48.2788	48.9807	84.9304	158.081	188.995	224.213
219.5	0.42725	1.61743	0.39673	1.09863	5.12695	6.40869	14.4348	18.3105	40.1917	47.4548	94.5435	156.799	185.76	266.968
220	0.06104	1.52588	0.03052	1.40381	3.63159	7.69043	15.9302	15.0452	34.79	60.1196	113.464	145.508	202.393	259.857
220.5	0.61035	0.5188	0.48828	1.37329	4.54712	9.18579	16.0828	16.4185	42.9993	67.0166	120.483	130.096	190.155	252.93
221	0.39673	1.0376	0.30518	0.54932	2.86865	6.22559	15.7471	16.6626	45.0134	62.4695	99.5178	132.599	207.275	253.082
221.5	0.42725	1.19019	-0.09155	0.94604	2.13623	5.06592	14.0991	13.1226	47.1497	67.1692	93.0481	124.817	199.402	248.932
222	0.79346	0.48828	0.15259	0.42725	2.31934	5.40161	11.4441	21.3928	44.0674	63.7512	98.7549	121.124	175.69	235.168
222.5	0.18311	0.57983	-1.31226	-0.76294	3.96728	7.78198	13.6719	17.8528	48.4619	72.2656	96.3745	127.075	165.833	234.222
223	0.03052	-0.09155	-0.42725	0.45776	3.9978	6.2561	12.9089	20.2942	49.4995	57.4951	85.0525	124.451	172.668	226.349
223.5	0.48828	0.42725	-0.45776	0	6.31714	6.71387	10.8948	24.8413	45.99	58.6243	82.3975	103.241	184.631	225.983
224	0.39673	0	-0.27466	0.15259	2.71606	8.11767	13.3667	22.9797	49.0723	60.73	91.0034	125.824	174.774	238.098
224.5	-0.27466	0.67139	-1.0376	0	3.93677	9.46045	8.94165	19.5618	51.8188	60.4858	90.9119	139.832	164.856	257.08
225	-0.36621	-1.00708	-1.0376	-0.7019	5.24902	6.16455	8.8501	18.3105	40.7105	63.9343	98.5107	148.224	170.563	257.263
225.5	0.30518	-0.24414	-0.18311	0.09155	4.82178	6.7749	11.4136	19.7449	41.8091	58.2886	103.638	126.801	187.103	274.658
226	0	-1.12915	-0.39673	0.57983	3.2959	7.50732	11.1694	17.4561	37.1704	71.8689	106.262	128.815	171.112	258.514
226.5	0.24414	-0.12207	0.85449	0.45776	3.8147	8.42285	10.3149	11.4441	41.1377	64.8804	105.835	115.356	177.734	250.702
227	-0.27466	-0.12207	0.30518	0.88501	4.57764	7.65991	10.5286	11.3525	44.9524	53.1616	100.891	125.488	189.88	246.887
227.5	0.57983	-0.18311	-0.18311	0	3.02124	8.54492	10.8948	13.3972	42.1142	55.2978	96.8323	115.173	190.918	249.359
228	0.24414	0.18311	-0.36621	-0.24414	1.92261	7.38525	8.48389	13.9771	45.3796	59.8145	100.464	113.312	200.684	234.161
228.5	-0.09155	0.09155	-0.64087	-0.24414	1.37329	4.88281	7.59888	18.158	47.2717	60.3027	114.563	122.284	203.4	226.837
232	-0.30518	0.54932	-0.64087	0.21362	1.5564	5.67627	8.66699	16.2048	37.9333	52.2156	107.513	131.5	183.624	242.371
232.5	-0.12207	0.48828	-0.30518	-0.18311	2.2583	6.86645	8.91113	17.2424	38.6963	61.3708	94.8791	132.324	180.634	235.016
233	0.67139	1.37329	0.24414	0.42725	1.70898	6.80542	8.57544	18.0054	36.2244	62.4695	97.29	135.071	181.946	255.432
233.5	0.7019	0.30518	-0.33569	0.67139	2.50244	5.40161	10.498	19.3787	33.783	59.6313	96.4661	125.702	190.948	239.441
234	1.00708	-0.03052	0	-0.24414	1.80054	5.34058	10.2234	18.8293	36.8652	55.603	91.5832	141.174	170.013	238.403
234.5	0.24414	0.36621	-0.79346	0	2.80762	8.05664	10.0403	18.4936	36.499	53.4363	90.5151	130.096	177.307	246.399
235	0.61035	0.61035	-0.27466	0.06104	2.44141	7.59888	8.66699	19.0125	36.438	52.8564	94.635	127.624	182.007	253.326
235.5	1.19019	0.7019	-0.39673	-0.33569	3.54004	7.96509	9.46045	20.0806	38.6352	54.9927	108.734	128.204	167.541	241.882
236	0.12207	-0.27466	-0.54932	0.15259	3.08228	5.79834	11.1694	24.3835	41.3818	53.3752	121.765	125.519	196.716	240.753
236.5	0.73242	0.27466	-0.61035	0.94604	1.98364	5.34058	8.94165	20.4773	40.5884	54.4739	115.112	115.997	207.825	241.425
237	0.97656	0.82397	0.18311	1.37329	2.68555	7.87353	8.60596	18.0359	45.8679	55.3284	116.272	100.464	218.811	232.635
237.5	0.54932	1.12915	0.30518	2.44141	4.79126	8.30078	10.2234	24.5666	44.22	50.1099	98.8769	117.249	188.934	253.052
238	0.57983	1.52588	0.36621	1.92261	4.27246	7.41577	8.60596	21.9421	43.0908	47.6074	101.746	135.559	191.132	261.749
238.5	1.46484	1.70898	0.48828	1.31226	2.74658	6.56128	10.2234	24.0784	48.7976	51.0864	88.9282	148.499	194.519	280.853
239	1.83105	0.76294	0.09155	0.33569	3.20435	9.24683	12.2376	23.4375	41.4124	49.408	103.302	138.672	191.223	249.329
239.5	1.28174	0	0.30518	2.0752	1.80054	8.81958	14.0381	30.8533	41.9006	48.6755	90.9424	155.609	198.914	247.498
240	0.94604	0.45776	0	-0.15259	3.05176	6.5918	11.0474	24.353	38.6963	48.645	107.697	153.198	178.619	241.699
240.5	1.34277	0.36621	0.27466	0.39673	2.0752	4.97436	13.7939	24.4141	50.0793	49.1943	98.3276	137.207	169.098	231.72
241	1.0376	0.18311	-0.42725	0.79346	2.7771	5.18799	14.7705	25.8484	39.8559	45.2881	100.464	121.185	177.46	231.232
241.5	0.39673	-0.48828	-0.88501	0.30518	2.92969	5.37109	11.7798	26.5198	42.0837	50.1709	97.8699	136.841	180.267	238.739
242	0.85449	1.2207	-0.48828	0.06104	1.67847	6.2561	10.8948	28.3203	43.4265	54.6265	72.9065	134.033	188.446	234.161
242.5	0.82397	0.73242	-0.91553	0.03052	2.28882	6.16455	14.679	26.6113	38.0249	56.9153	77.362	105.194	168.518	242.249
243	0.03052	0.27466	-0.54932	0.27466	2.22778	5.40161	16.449	30.7312	36.4075	50.3235	79.8645	108.276	177.032	236.481
243.5	-0.21362	0.27466	-0.97656	0.39673	2.13623	6.74438	17.9138	29.1748	39.5203	50.1099	71.991	109.558	173.187	235.168
244	0.18311	-0.42725	-1.61743	-0.24414	2.41089	10.1623	14.8621	27.1301	40.2222	50.3235	91.2476	116.058	172.241	217.346
244.5	-0.82397	0.06104	-0.18311	0.21362	1.28174	7.08008	17.395	21.5149	44.6472	58.6548	89.1418	117.096	188.202	205.688
245	-0.67139	-0.27466	-0.48828	1.00708	1.61743	7.8125	10.2844	26.1841	45.8984	53.4973	88.4704	104.004	176.361	219.757
245.5	-0.76294	0.94604	-1.15967	-0.27466	2.19727	7.90405	10.2234	28.3814	43.6401	49.1638	88.8061	118.164	173.248	246.521
246	0.24414	1.37329	-1.37329	0.64087	1.64795	8.36182	9.21631	29.3579	46.0205	52.7649	71.9604	129.517	174.561	240.723
246.5	0.18311	0.67139	-0.57983	1.25122	2.10571	7.78198	7.47681	26.7639	50.1709	59.906	81.2683	119.659	191.04	239.227
247	-0.21362	0.15259	-1.5564	0.64087	1.70898	10.2539	7.65991	36.8347	51.6968	58.9294	77.8503	128.906	201.782	239.319
247.5	-0.88501	-0.39673	-0.45776	0	1.64795	12.7869	9.3689	25.9705	54.5959	73.3032	91.9189	135.071	204.102	245.148
248	0.36621	-0.48828	-0.61035	0.24414	1.5564	9.33838	12.1155	25.3296	48.3704	69.7327	88.562	137.177	198.975	247.284
248.5	-0.15259	-0.30518	-0.36621	-0.12207	2.41089	9.88769	9.94873	22.9797	45.105	64.3921	98.3887	151.337	190.735	251.373
249	1.09863	-0.12207	-0.61035	-0.15259	1.34277	7.75146	10.0708	23.1323	45.105	68.3899	99.762	150.024	188.904	250.122
249.5	0.33569	0.03052	-0.91553	-0.57983	2.31934	11.3525	9.46045	22.7661	54.3213	69.6106	89.1113	140.808	195.953	235.657
250	0.67139	0.85449	-0.67139	0.21362	3.26538	13.0005	12.1765	23.1323	51.7883	83.5876	91.0034	152.344	203.888	243.713
250.5	0.61035	1.0376	-0.91553	-0.03052	3.96728	12.97	11.8408	20.2637	54.3823	75.2563	86.1206	147.949	200.073	221.893
251	-0.42725	0.97656	0	0.06104	1.70898	8.94165	10.2234	15.2588	57.251	70.8923	92.6208	157.715	164.886	215.973
251.5	0.48828	-0.18311	-0.76294	0.30518	2.0752	10.7727	11.6882	24.7803	40.802	72.9065	82.3364	155.182	178.772	209.991
252	0.33569	0.15259	-0.33569	0.36621	3.69263	7.53784	9.52148	24.9023	39.917	64.3616	82.1228	141.693	167.572	218.872
252.5	1.19019	0.09155	-0.64087	-0.18311	2.9602	10.0403	10.8337	20.1721	42.8467	67.8406	74.9512	144.379	179.047	215.271
253	0.39673	0.48828	0	1.28174	2.53296	6.68335	10.1318	21.3928	49.3164	66.4673	76.1719	138.123	182.831	217.041
253.5	0.30518	0.5188	-0.03052	0.42725	3.35693	7.17163	8.66699	19.0125	48.2788	70.1294	79.4983	128.143	173.492	203.674
254	0.30518	0.57983	0.15259	1.5564	4.3335	7.35474	8.48389	23.0713	46.2646	65.8264	75.1953	128.479	191.742	253.723
254.5	1.37329	1.49536	-0.79346	0.57983	5.49316	7.93457	8.20923	19.3787	42.6025	62.7747	87.616	133.27	184.204	240.845
255	0.79346	1.2207	0.33569	0.15259	4.11987	10.7422	9.79614	19.6228	44.0674	65.5823	98.6938	143.646	179.718	237.793
255.5	0.88501	1.52588	0.30518	0.54932	4.73022	10.3149	12.207	19.3481	44.2505	63.6597	98.938	138.916	176.086	256.988
256	0.48828	2.22778	0.48828	0.67139	4.24194	8.14819	8.94165	21.2097	39.7339	53.8635	106.415	130.035	170.99	246.246
256.5	0.09155	1.06812	-0.5188	0.12207	3.2959	8.42285	9.76562	22.0337	44.5251	49.7437	108.032	119.324	161.957	222.534
257	1.06812	1.43433	-0.03052	0.97656	2.92969	9.39941	8.75854	17.4255	41.1682	61.4624	105.652	134.216	191.711	223.724
257.5	0.21362	1.25122	-0.48828	0.21362	4.15039	8.94165	10.3455	18.9819	42.3889	58.6243	112.091	125.061	199.646	228.394
258	1.19019	1.58691	-1.43433	0.73242	3.63159	6.34766	10.4675	15.9912	52.4597	71.167	111.572	120.605	175.72	206.177
258.5	0.36621	0.33569	-1.15967	1.19019	2.68555	7.32422	10.2844	20.7825	47.0276	61.2488	103.149	131.409	189.606	217.163
259	0.21362	1.12915	-1.64795	0.73242	2.9602	6.5918	10.3149	20.9045	43.335	50.7507	110.443	132.019	175.171	234.405
259.5	0.7019	1.06812	-1.25122	-0.48828	3.38745	7.90405	9.06372	17.0898	43.6096	49.0112	105.438	140.167	166.473	246.887
260	0.12207	0.64087	-1.89209	-0.61035	5.40161	7.47681	10.437	18.28	40.3747	50.0183	106.11	150.177	178.284	264.709
260.5	-0.06104	0.5188	-0.97656	-0.09155	1.92261	8.91113	10.4065	21.7285	37.8723	58.6548	100.403	149.75	171.478	249.664
261	-0.61035	0.57983	-1.25122	0.45776	2.74658	8.5144	9.52148	19.989	43.7012	67.5049	120.789	129.578	180.572	225.983
261.5	-0.27466	0.97656	-1.12915	-0.45776	1.12915	7.20215	10.6812	17.0288	40.3442	62.7747	109.436	135.62	185.15	247.986
262	0.12207	1.40381	-0.82397	-0.15259	3.8147	5.06592	9.12475	22.0947	46.8445	64.7888	99.1516	151.642	182.8	230.377
262.5	0	0.91553	-0.73242	0.94604	3.08228	5.18799	8.11767	19.2261	35.7056	69.9768	96.405	154.419	173.859	229.401
263	0.36621	0	-0.64087	1.34277	3.57056	4.91333	10.1318	18.4021	42.572	61.676	88.2263	144.104	178.864	233.276
263.5	-0.12207	0.30518	-0.06104	1.95312	3.66211	5.06592	14.8315	17.8223	41.9006	68.8782	103.76	127.319	164.49	237.946
264	1.00708	0.18311	-0.06104	2.62451	3.8147	5.21851	17.7002	14.5874	37.6587	55.4504	97.9004	118.713	162.537	226.837
264.5	0.7019	0.57983	-0.73242	1.40381	2.9602	4.88281	18.5547	17.6392	34.1797	55.8472	96.405	134.43	165.741	235.046
265	0.79346	0.64087	-0.36621	1.5564	2.74658	5.7373	15.1977	20.0806	32.196	49.3469	97.0764	126.343	176.453	238.617
265.5	0.12207	0.61035	-0.33569	0.30518	1.92261	4.76074	16.3269	22.644	28.1982	36.8652	91.4001	125.397	184.937	234.741
266	-0.12207	0.12207	-1.00708	0	3.14331	5.49316	16.449	22.8271	32.4402	53.0701	96.4355	117.126	176.575	252.594
266.5	-0.09155	1.0376	-0.24414	0	2.86865	4.91333	15.7471	19.5618	38.6047	54.1077	101.837	123.535	178.009	260.956
267	0.45776	0.61035	0.42725	-0.30518	2.0752	5.40161	16.0828	19.043	33.4473	57.9224	96.9543	123.718	182.953	228.943
267.5	0.36621	0.42725	-0.73242	-0.30518	2.74658	9.12475	13.2141	19.4092	36.9568	41.9617	94.0857	135.742	180.237	237.335
268	-0.12207	-0.12207	-0.64087	-0.64087	2.59399	7.47681	9.91821	19.5312	41.9312	48.0347	95.8862	133.545	169.8	222.351
268.5	0.79346	1.64795	0.42725	-0.03052	3.72314	6.01196	9.94873	24.0479	41.9922	49.9573	99.823	128.021	175.018	215.912
269	0.18311	-0.03052	-0.42725	0.27466	5.52368	8.30078	9.18579	20.9961	42.5415	54.4128	81.9092	118.286	171.143	213.013
269.5	0.61035	0.54932	-0.21362	-1.2207	5.24902	6.62231	13.031	24.1699	49.4995	49.0112	92.4988	113.159	206.726	204.529
270	0.03052	0.67139	-0.64087	0.61035	5.7373	9.70459	16.1438	26.9165	53.3447	53.1616	102.814	108.398	163.147	197.876
270.5	0.09155	0.15259	0.21362	0.36621	4.39453	7.93457	18.7378	30.3955	52.2766	46.9665	88.501	117.462	149.933	206.696
271	0.91553	0.97656	0.30518	0.18311	3.05176	6.01196	19.928	30.2429	49.3469	45.9595	96.344	126.801	142.822	233.856
271.5	0.73242	0.76294	-0.39673	1.00708	3.23486	6.53076	16.9067	21.7895	46.6309	44.9829	100.281	129.913	149.902	216.858
272	0.18311	0.48828	0.57983	0.57983	2.56348	5.43213	17.395	30.4565	33.2642	54.718	97.2595	130.768	145.752	226.135
272.5	0.61035	0.03052	0.18311	1.86157	2.31934	8.14819	14.801	36.2549	26.4282	58.8074	112.305	118.53	163.269	239.441
273	0.5188	0.61035	0.03052	1.70898	2.10571	6.28662	13.5803	33.2947	34.4543	59.7839	104.492	113.739	166.077	238.464
273.5	1.2207	1.52588	0.67139	0.06104	2.34985	6.073	11.2305	33.3252	34.2407	69.3665	98.7244	114.655	168.915	241.425
274	0.61035	0.67139	0.12207	0.57983	1.7395	5.31006	11.0779	30.9753	40.1001	67.0166	95.8557	133.85	168.884	257.019
274.5	0.12207	0.39673	0	-0.39673	2.71606	5.09644	8.57544	30.9448	34.1187	67.0166	105.53	126.099	152.74	241.058
275	-0.27466	0.09155	-0.73242	0.09155	2.86865	5.49316	9.06372	23.1628	42.6636	59.1431	106.995	106.354	143.555	262.024
275.5	-0.03052	0	-0.24414	-0.24414	1.7395	6.01196	8.3313	26.2756	52.0935	51.8188	118.988	120.483	152.496	257.202
276	0.21362	0	-0.33569	-0.45776	1.49536	4.27246	7.50732	34.1187	48.4924	52.5513	102.203	130.89	156.403	254.913
276.5	0.18311	0.39673	-1.40381	-0.5188	3.14331	5.0354	7.78198	24.9329	39.7339	60.1807	91.6748	126.953	170.593	259.033
277	-0.15259	0	-0.21362	-0.36621	5.27954	6.073	7.23267	26.1841	26.6113	49.8657	98.2361	131.348	161.468	255.585
277.5	0.21362	1.12915	0.03052	-0.57983	4.63867	5.12695	9.33838	27.0081	29.4189	55.2368	98.938	122.772	169.922	238.129
278	0.15259	-0.09155	-1.5564	0	3.63159	4.5166	11.8408	32.4707	30.6396	66.3147	106.293	126.739	185.242	239.899
278.5	0.42725	0.5188	-0.45776	-0.64087	2.53296	6.80542	13.7024	24.3225	40.5884	62.1338	94.3298	132.568	172.241	242.92
279	-0.30518	0.45776	-0.94604	-0.64087	2.62451	6.50024	11.4136	26.825	36.5295	59.5093	104.828	132.935	186.584	256.866
279.5	-0.03052	-0.21362	-0.82397	-0.09155	2.99072	6.04248	14.0076	25.2075	29.8767	52.1545	105.194	126.099	183.258	254.639
280	0.45776	0.36621	0.45776	-0.15259	3.02124	4.88281	16.6931	26.7029	31.9214	44.4641	107.513	131.195	180.42	240.173
280.5	-0.54932	0.21362	-0.76294	0.18311	1.5564	5.18799	13.4277	31.4636	37.5977	49.7742	115.631	134.247	151.154	222.9
281	0.73242	0.33569	-0.54932	-0.48828	1.86157	6.28662	16.449	23.3765	30.5481	54.8706	117.706	141.907	161.652	249.634
281.5	1.34277	0.57983	-0.42725	0.30518	3.14331	5.15747	17.7612	27.0996	30.7617	39.5203	104.767	131.714	157.501	262.756
282	0.42725	-0.06104	-0.30518	-0.06104	1.83105	6.04248	12.5122	32.2266	26.5198	50.0793	100.281	143.158	165.955	241.333
282.5	0.06104	0.06104	-0.64087	-0.24414	1.70898	9.24683	12.085	29.3579	37.9028	60.4553	99.9756	136.078	181.427	257.69
283	-0.33569	1.37329	0.03052	-0.15259	2.7771	8.36182	16.7236	33.6609	37.2009	70.5261	98.7854	133.606	194.702	267.303
283.5	0.79346	0.94604	-0.36621	0.12207	3.14331	6.89697	16.6321	29.7241	33.2336	55.6335	106.506	127.411	181.152	251.312
284	0.45776	0.33569	-0.06104	0.06104	2.92969	7.38525	17.9138	28.9001	39.9475	56.6711	92.6819	124.817	182.465	254.913
284.5	0.94604	0.48828	-1.0376	0.82397	4.85229	9.30786	14.4653	25.4211	37.6892	55.3284	88.9587	130.249	182.312	248.291
285	0.06104	0.06104	-0.39673	1.09863	4.63867	9.49097	12.1155	22.5525	34.3628	53.8025	91.98	120.514	189.484	232.849
285.5	0.85449	0.21362	-0.33569	0.57983	2.83813	8.78906	14.74	28.0151	34.9731	51.3916	95.459	124.817	189.545	231.628
286	0.45776	0.64087	-0.03052	0.64087	2.04468	6.65283	11.8408	24.9329	42.45	55.8777	87.616	112.823	196.869	242.493
286.5	0.45776	0.88501	-0.33569	-0.27466	2.28882	10.2539	12.3596	25.8789	35.9802	52.5818	102.692	116.455	190.125	252.625
287	1.77002	1.12915	0.27466	0.94604	2.86865	12.5732	13.9465	25.4517	29.2969	53.3447	107.483	140.594	182.312	288.361
287.5	1.25122	1.89209	-0.15259	1.92261	2.80762	11.1084	18.4631	23.9563	31.25	52.3071	102.57	133.728	162.933	290.131
288	0.94604	1.15967	0.21362	2.01416	2.68555	7.96509	16.6016	25.9705	30.6396	50.9644	106.14	132.202	149.75	276.947
288.5	1.92261	1.12915	0.39673	0.82397	4.05884	11.4136	14.2822	22.0032	32.898	56.9763	103.79	130.28	173.431	266.174
289	0.42725	1.2207	-0.21362	0.7019	4.5166	11.3831	16.3574	21.3623	45.0745	54.1687	104.919	143.585	179.657	261.078
289.5	1.28174	1.52588	-0.27466	0.57983	3.60107	9.27734	16.8762	19.8364	40.9851	51.7273	84.8694	151.764	176.392	254.456
290	0.21362	1.0376	-0.06104	1.98364	2.34985	8.36182	17.3645	25.2686	39.4897	52.3376	87.1582	150.726	176.727	257.507
290.5	1.0376	0.03052	-0.33569	0.15259	2.19727	7.75146	13.5803	39.5508	40.9241	51.3	80.9631	137.787	201.05	252.411
291	0.7019	0.94604	-0.5188	-0.39673	2.89917	10.376	18.1274	31.0974	43.9453	49.1028	79.6509	143.494	166.779	240.265
291.5	0.54932	0.39673	0.12207	0	3.23486	13.0005	16.2659	22.0032	34.3933	48.7671	71.6248	127.747	159.149	223.297
292	0.61035	0.7019	-0.85449	-0.5188	2.28882	11.6882	18.4936	26.1536	28.4729	47.2412	82.8857	117.249	173.676	239.99
292.5	0.27466	0.57983	-0.42725	0.06104	2.83813	8.36182	14.7095	21.1792	31.9824	49.2554	95.8557	135.59	163.33	231.262
293	0.48828	0.64087	0.15259	0.03052	2.44141	10.0708	13.3667	19.1345	31.5552	57.6782	91.095	129.089	174.591	246.948
293.5	0.09155	0.30518	0.88501	-0.09155	3.32642	10.2844	16.6626	16.6016	42.7856	48.0957	84.1064	119.781	167.755	264.587
294	0.09155	0.09155	0.7019	-0.79346	3.20435	13.8855	15.4419	17.6392	39.6118	49.5605	83.8928	129.028	154.358	254.15
294.5	-0.18311	-0.36621	0.09155	-0.39673	3.32642	9.52148	10.5896	20.0806	30.426	61.2488	78.1555	128.54	149.231	252.686
295	0.33569	0.09155	0.48828	0.21362	2.44141	7.56836	13.4582	21.7895	32.196	52.6123	84.3506	128.632	171.143	259.003
295.5	0.64087	0.91553	0.12207	-0.42725	2.59399	7.01904	17.395	23.0713	41.2292	53.3142	86.0596	145.05	163.635	227.631
296	0.67139	-0.18311	0	0.06104	2.62451	6.04248	18.3105	23.4375	45.227	63.9954	85.1745	127.228	180.786	225.037
296.5	0.36621	0.42725	0.09155	1.64795	3.44849	4.36401	17.4866	25.6958	43.8843	57.7087	86.4563	117.126	190.826	233.704
297	0.82397	1.52588	0.39673	1.5564	1.86157	7.08008	14.5264	28.2898	45.3796	54.4128	85.3271	115.57	183.136	234.985
297.5	0.67139	0.27466	0.21362	1.52588	3.05176	6.5918	10.376	24.7803	41.7786	56.6711	86.731	114.868	176.117	217.285
298	0.79346	-0.57983	-2.0752	0.57983	3.35693	7.59888	10.5591	19.5007	49.8352	53.2532	90.6372	132.385	190.308	216.187
298.5	0.5188	0	-0.64087	2.19727	2.50244	7.87353	11.8713	20.9351	54.5349	51.6663	87.5854	130.402	180.786	228.638
299	0.57983	-0.12207	-0.76294	1.7395	2.50244	6.16455	11.3525	24.1394	45.3796	49.7131	76.1719	120.178	197.479	228.149
299.5	0.82397	0.06104	0.18311	0	1.64795	5.12695	12.207	17.8833	39.3372	61.8591	91.5527	107.788	218.75	243.958
300	1.19019	0.76294	-0.12207	1.2207	2.22778	6.62231	15.625	16.7541	36.1633	48.4009	93.6279	123.596	215.942	262.482
300.5	0.88501	-0.42725	-1.0376	0.5188	2.31934	6.71387	13.6108	18.7378	35.0647	45.0134	95.2454	133.209	204.285	254.73
301	1.00708	0.61035	-0.94604	0.76294	4.3335	8.45337	17.0288	16.6626	42.3889	52.185	96.0388	136.475	183.807	262.085
301.5	1.09863	0	-0.67139	1.0376	1.34277	8.05664	15.9302	17.1509	37.2009	46.6614	101.379	129.7	168.732	251.312
302	0.82397	0.57983	-0.39673	-0.18311	2.38037	5.37109	10.6201	19.2566	33.783	48.0652	94.1162	127.258	179.932	236.45
302.5	1.19019	0.21362	0.5188	0.85449	4.08935	6.80542	11.5051	19.1345	32.0129	51.5137	94.4519	132.202	167.053	261.139
303	0.73242	0.48828	0	0.85449	3.87573	5.21851	11.4441	20.1721	39.3372	71.228	112.488	127.747	179.382	258.484
303.5	0.57983	1.61743	-0.39673	1.43433	3.08228	6.22559	14.7095	14.7705	46.3562	75.9582	108.704	123.016	159.363	259.521
304	1.25122	0.64087	0	0.94604	3.75366	5.5542	12.6343	19.1956	40.9241	61.4929	114.899	123.657	192.139	244.69
304.5	1.19019	0.39673	0.39673	-0.18311	2.7771	5.58472	11.8408	20.2026	34.1797	63.324	100.006	135.834	187.714	245.087
305	1.70898	1.37329	0.12207	0.82397	5.61523	6.19507	11.9324	17.8833	35.2783	61.554	100.098	135.01	183.96	236.328
305.5	1.43433	1.61743	0.45776	1.09863	3.38745	7.47681	12.4817	14.8926	36.6821	65.094	96.5881	146.057	181.702	245.3
306	0.30518	1.00708	-0.42725	0.76294	6.28662	5.49316	11.8713	19.7449	39.5508	61.7065	105.347	130.707	191.284	243.866
306.5	1.49536	0.94604	-0.06104	1.34277	4.05884	6.83594	11.6882	25.3296	36.7126	61.4624	105.53	133.545	184.296	213.745
307	0.94604	0.82397	-0.09155	0.73242	4.3335	6.98852	7.75146	28.3203	44.8608	63.0798	96.4355	148.529	181.183	223.45
307.5	1.2207	0.91553	-0.36621	1.46484	5.0354	6.28662	9.12475	31.2195	43.457	64.27	95.52	118.744	160.004	235.596
308	0.82397	1.00708	-0.12207	1.67847	3.75366	7.14111	8.54492	27.9541	43.4265	54.779	93.2007	110.809	157.379	226.593
308.5	0.67139	-0.06104	-0.15259	-0.15259	4.15039	7.84302	7.32422	25.238	48.584	58.96	109.68	113.434	157.837	213.623
309	0.7019	0.57983	-1.12915	0.5188	2.44141	6.53076	8.42285	26.062	42.1753	60.4553	100.464	122.498	147.583	221.954
309.5	0.48828	-0.09155	0.64087	0.91553	1.89209	5.43213	11.7798	27.1606	40.1306	61.0657	100.281	113.098	159.058	234.802
310	0.30518	0.85449	0.06104	-0.7019	3.54004	4.88281	9.76562	23.2849	30.7922	54.6875	100.494	117.798	163.696	222.504
310.5	0.36621	-0.73242	0.21362	-0.45776	3.60107	4.97436	11.7798	23.2544	28.9612	58.5022	87.7686	109.711	157.928	203.308
311	0.18311	-0.15259	-0.5188	0.18311	3.69263	4.21143	10.8643	23.1323	25.4822	70.8923	86.4563	122.009	150.574	200.409
311.5	-0.09155	-0.48828	-0.76294	0.06104	3.20435	5.49316	8.69751	19.1956	29.2664	72.3877	94.2383	119.141	164.398	232.819
312	0.30518	0.09155	-0.48828	-0.39673	2.92969	4.5166	7.8125	22.8577	29.3884	65.3686	98.6328	125.214	167.389	236.877
312.5	0.03052	0.06104	-1.0376	-0.57983	5.70679	4.79126	10.5896	26.886	36.9568	64.3921	85.5102	139.832	163.116	236.114
313	0.24414	0	0	-0.09155	2.56348	7.17163	15.5945	30.5481	35.553	49.469	96.2829	145.996	163.879	237.976
313.5	0.48828	0.79346	-0.39673	0.03052	4.21143	6.65283	12.4207	19.5618	32.3486	60.8215	100.525	144.379	182.22	230.194
314	-0.42725	0	-0.39673	-0.27466	2.7771	7.75146	9.24683	23.6816	28.717	67.3218	99.3957	130.096	196.35	231.934
314.5	0.67139	-0.15259	0.24414	0.39673	2.44141	11.7188	10.8337	26.4893	33.9355	64.209	99.884	131.653	178.528	231.506
315	0.61035	0.5188	0.45776	-0.06104	2.89917	15.564	11.8103	25.6043	41.1377	73.4863	98.999	138.306	184.387	221.252
315.5	0.54932	-0.18311	-0.12207	-0.39673	3.02124	12.2986	14.4653	28.2288	29.5715	72.9675	104.218	147.491	181.152	233.795
316	0.42725	0.12207	-0.18311	1.77002	3.66211	7.56836	12.8479	21.8811	35.5225	69.9158	93.3227	135.04	192.902	222.931
316.5	0.5188	0.15259	1.09863	0.06104	2.9602	8.27026	10.7117	19.6533	38.9404	66.8945	85.7239	136.81	186.127	234.375
317	0.06104	0.03052	-0.36621	1.61743	1.5564	10.4065	9.88769	19.3176	33.3252	78.7964	97.6257	137.207	160.583	239.166
317.5	0.15259	0	-0.09155	0.45776	2.04468	6.5918	8.20923	25.0244	39.917	69.7937	95.0623	138.947	174.5	250.671
318	0	0.64087	-0.30518	0.09155	3.26538	4.66919	9.79614	19.4702	38.6963	70.2209	83.0078	132.294	171.783	245.819
318.5	0.21362	1.25122	0.06104	0.33569	3.8147	5.67627	11.8713	23.0102	42.572	65.4602	94.1162	131.256	186.096	237.64
319	0.48828	0.27466	0.45776	-0.33569	2.19727	6.53076	13.0615	22.3694	40.5579	54.9622	93.4448	123.444	167.847	268.005
319.5	0.5188	0.61035	0.57983	0.39673	2.71606	8.45337	12.3291	22.583	35.7361	59.5093	113.8	139.801	184.753	261.597
320	0.82397	0.79346	0.67139	-0.30518	4.54712	6.10352	11.5051	25.9399	30.0293	62.1338	117.767	160.95	175.476	260.712
320.5	-0.27466	0.79346	1.06812	1.0376	5.40161	8.36182	12.0239	27.1301	30.7922	74.585	111.176	136.139	171.875	246.094
321	0.48828	1.2207	0.45776	1.52588	3.17383	8.81958	15.1062	22.3694	32.3792	77.8808	100.037	140.747	180.267	227.966
321.5	1.19019	0.57983	0	1.61743	3.20435	6.86645	18.9514	18.9514	24.5666	72.937	90.1794	139.648	167.511	239.105
322	1.12915	0.91553	0.06104	1.49536	3.08228	11.7493	16.6626	22.1558	28.0456	78.5217	97.3205	133.82	167.114	218.567
322.5	1.09863	1.49536	0	0.48828	5.0354	13.1531	16.8762	19.5618	32.959	70.5871	88.501	115.204	184.113	229.279
323	0.82397	1.31226	0.09155	1.19019	5.76782	12.4207	15.686	22.1252	30.7312	78.6743	110.199	138.855	179.932	242.096
323.5	0.88501	1.37329	0.18311	2.2583	3.26538	14.0381	13.031	23.0408	29.4189	69.458	100.739	142.395	166.779	236.725
324	0.42725	0.67139	0.12207	0.73242	2.62451	10.9558	11.9629	16.9983	26.886	67.0471	93.689	140.381	178.253	246.857
324.5	0.42725	0.7019	0.27466	0.61035	2.34985	6.86645	11.1999	14.8621	23.5291	65.1855	108.429	126.038	177.124	255.89
325	0.27466	0.03052	-0.27466	0.33569	2.31934	9.33838	11.2915	20.4468	25.3601	74.3103	105.225	138.611	164.001	246.307
325.5	0.67139	0.64087	-0.27466	-0.27466	3.02124	9.88769	11.7798	19.1956	22.4304	66.2536	93.9331	142.151	153.564	248.749
326	-0.09155	-0.06104	-0.36621	0.30518	2.68555	12.4512	12.085	22.8271	21.6064	71.3196	99.0906	137.939	139.435	244.354
326.5	0.24414	0.54932	-0.67139	0.33569	2.9602	13.4582	15.6555	24.6582	24.4446	69.0307	101.624	123.322	163.696	235.504
327	0.39673	0.03052	1.19019	0.7019	1.34277	15.1062	17.9748	20.05	20.874	68.2678	95.7336	123.84	172.852	212.952
327.5	0.15259	-0.21362	-0.18311	0.61035	2.16675	12.5122	13.0005	27.3743	24.4751	61.8591	87.4634	122.62	166.931	227.905
328	-0.82397	-0.21362	-0.57983	0.7019	2.34985	8.5144	16.449	26.825	35.4004	66.4673	102.142	121.582	178.131	242.676
328.5	0.61035	-0.03052	0.42725	0.06104	4.24194	8.78906	17.9748	28.3203	31.7383	65.094	113.159	106.842	166.199	267.639
329	0.33569	0.21362	0.33569	0.42725	3.08228	8.08716	19.928	29.5715	29.602	59.1431	106.323	115.967	169.861	262.36
329.5	0.91553	0.42725	-0.67139	1.46484	3.78418	8.57544	15.4114	28.4729	27.9236	68.8782	106.842	116.241	164.795	237.762
330	0.21362	0.85449	-0.5188	-0.09155	3.02124	9.39941	13.7634	26.9775	26.4893	67.0776	114.441	100.067	165.833	293.579
330.5	0.67139	-0.36621	0.64087	0.91553	2.80762	8.88061	10.4675	27.71	27.4048	61.3403	119.232	108.429	180.695	270.019
331	-0.03052	-0.03052	-0.18311	1.00708	3.72314	7.41577	11.5051	25.5432	30.0598	53.5278	122.314	124.756	174.5	262.36
331.5	-0.06104	0.06104	-0.24414	0.76294	2.10571	7.20215	11.5051	28.1067	27.2827	59.1431	110.26	141.754	187.012	264.038
332	-0.03052	0.42725	-0.54932	0.48828	3.35693	7.41577	8.72803	28.717	27.4963	65.5517	122.406	130.341	192.017	254.272
332.5	0.5188	0.57983	-0.54932	3.8147	2.99072	6.62231	8.5144	31.1279	29.602	57.2815	114.716	124.969	175.201	273.468
333	0.79346	0.33569	-0.42725	1.70898	2.22778	6.80542	8.60596	23.8342	29.9072	67.1997	104.797	123.993	158.752	269.958
333.5	0.39673	0.27466	0	2.50244	3.26538	8.75854	12.7563	26.7944	29.48	70.0683	92.2241	122.894	159.912	258.972
334	0.12207	0.06104	-0.67139	1.86157	2.13623	7.90405	13.8855	24.0173	26.4282	85.7544	86.6394	127.716	170.563	254.639
334.5	0.30518	0.5188	-0.36621	0.18311	2.44141	8.45337	12.085	20.5689	26.2146	74.5544	85.968	110.962	183.166	233.124
335	0.64087	0.09155	0.06104	0.64087	2.16675	9.30786	17.1509	25.6043	23.3154	79.4983	91.6443	115.845	150.208	253.143
335.5	0.94604	-0.18311	-0.57983	-0.24414	2.65503	9.0332	17.8223	19.8059	25.8789	78.4912	79.2847	125.824	163.422	252.808
336	0.73242	0.61035	0.12207	0.64087	1.98364	6.22559	12.3901	20.9656	23.1628	62.7441	97.1069	142.334	160.126	232.727
336.5	0.24414	0.39673	0.18311	0.82397	2.86865	7.01904	12.6648	21.3013	22.9187	51.6052	92.6514	148.407	156.189	263.611
337	1.28174	-0.24414	-0.33569	-0.18311	1.46484	9.21631	20.1416	27.3132	39.3066	54.8401	96.405	149.841	158.203	257.599
337.5	0.21362	0.48828	-0.18311	0.64087	1.89209	9.39941	18.0664	25.0855	36.9873	51.2695	111.572	136.475	159.546	250.641
338	0.88501	0.97656	-0.24414	0.45776	3.50952	9.39941	16.51	20.9351	32.959	50.7202	103.79	138.611	159.058	245.239
338.5	0.85449	0.30518	0.06104	0.24414	4.63867	10.6201	13.8245	20.3857	34.3017	51.8494	100.861	142.487	172.791	255.493
339	0.54932	-0.39673	-0.5188	0.82397	3.60107	9.09424	11.261	21.3928	35.5225	58.9905	96.4355	140.808	183.411	264.191
339.5	0.64087	0.21362	-0.94604	0.91553	3.87573	6.01196	10.7727	18.0359	36.8042	64.4226	105.957	139.13	182.037	266.113
340	1.25122	0.42725	-0.45776	0.03052	4.08935	7.65991	12.5427	18.1274	30.9753	64.9109	108.826	128.448	171.539	267.944
340.5	0.21362	0.57983	-0.33569	-0.33569	3.75366	9.0332	13.8855	20.752	34.5459	62.2559	114.624	134.857	181.122	262.939
341	0.76294	-0.06104	-0.94604	0.18311	2.41089	7.93457	11.9324	21.698	37.4451	69.2139	102.692	135.498	204.895	254.059
341.5	0.24414	0.82397	-0.79346	0.18311	2.13623	6.16455	11.7798	22.522	36.3159	66.925	93.9331	127.289	204.193	259.216
342	0.67139	0.12207	-0.27466	-0.15259	2.01416	6.98852	14.5569	19.043	40.9546	60.9131	92.9565	119.72	192.871	251.678
342.5	-0.27466	-0.15259	-0.42725	0.79346	4.18091	8.5144	9.64355	22.2473	33.6609	53.3752	74.6155	120.209	185.242	269.287
343	0.15259	0.42725	-1.28174	0.39673	1.61743	9.30786	16.1438	23.0713	32.898	50.9644	88.562	120.3	182.983	263.458
343.5	0.45776	-0.67139	-0.94604	0.97656	3.78418	6.83594	15.8386	25.2686	30.5786	58.5938	95.0317	134.735	192.23	276.367
344	0.48828	-0.5188	-0.45776	1.34277	1.31226	4.24194	9.73511	22.5525	32.9285	61.0657	100.25	138.367	195.587	271.637
344.5	-0.45776	0	-1.61743	0.30518	2.01416	4.97436	11.0779	26.5503	39.917	65.3992	107.605	135.376	181.519	280.792
345	-0.30518	0	-0.45776	1.2207	2.22778	5.21851	11.2915	26.001	33.6304	64.3921	104.523	117.157	155.975	261.658
345.5	0.06104	-0.09155	-0.76294	0.64087	1.28174	4.57764	14.9231	28.656	34.79	62.3779	124.145	130.035	167.389	234.711
346	0	-0.15259	-0.36621	0.24414	3.66211	5.40161	10.5896	33.5388	31.4636	58.4717	122.742	136.902	183.472	244.08
346.5	0.82397	0.36621	-0.03052	0.27466	2.59399	4.79126	10.9558	22.3999	33.905	60.3027	105.652	137.207	182.404	254.669
347	0.82397	-0.09155	0.30518	-0.15259	1.52588	5.0354	13.855	29.1443	38.5437	68.3594	107.269	148.437	172.211	259.674
347.5	0.30518	0.30518	-1.34277	-0.03052	1.67847	5.00488	11.2305	27.5574	45.1355	67.5354	100.952	166.87	173.614	253.876
348	0.39673	0.67139	-1.7395	0.12207	1.98364	6.31714	14.1602	21.0266	51.239	56.3049	113.647	160.553	169.556	250.214
348.5	0.15259	0.24414	0.15259	-0.06104	3.60107	5.27954	11.5051	24.8108	45.929	48.584	124.634	163.3	161.499	244.385
349	0.42725	-0.06104	-0.57983	0.48828	3.72314	6.34766	12.4817	24.4446	41.9922	55.2063	125.122	151.398	163.33	241.852
349.5	1.61743	0.57983	-0.54932	0.30518	3.96728	5.79834	14.4348	22.1252	38.5437	52.7039	112.061	151.093	162.72	248.352
350	1.34277	0.57983	0.03052	0.54932	2.04468	6.62231	11.5356	24.5056	37.9333	70.4651	117.126	171.417	166.199	230.133
350.5	0.54932	0.39673	-0.76294	2.50244	2.65503	5.58472	11.5051	24.7497	35.2173	80.7495	101.257	171.905	168.488	234.802
351	0.85449	-0.03052	0.36621	2.41089	2.22778	6.34766	9.85718	23.0102	37.8418	68.1457	88.5315	166.321	144.409	263.977
351.5	0.48828	0.39673	-0.30518	1.12915	1.58691	7.78198	7.72095	21.4844	33.9661	70.1599	90.9729	166.382	156.403	262.329
352	0.61035	-0.27466	-0.61035	1.67847	1.86157	9.09424	10.3455	20.874	30.6396	69.1528	92.9565	140.533	185.913	276.581
352.5	0.57983	0.30518	-0.88501	0.67139	3.02124	11.3525	12.3291	23.2544	31.3721	71.8384	94.7876	155.762	190.552	257.202
353	0.42725	0.7019	-0.39673	-0.24414	4.21143	12.4817	10.8948	28.8696	40.2527	70.3125	87.4939	144.043	191.895	257.629
353.5	1.37329	1.0376	-0.45776	0.76294	4.42505	12.3596	12.8784	20.1111	47.4548	69.9158	79.6509	152.13	186.34	251.709
354	0.82397	1.37329	-0.36621	0.67139	3.57056	11.9324	16.571	17.2119	42.4805	67.2302	94.5435	138.336	179.962	253.662
354.5	0.64087	0.88501	0.33569	1.25122	4.66919	7.84302	13.4888	21.637	42.6941	59.1125	99.762	135.223	165.497	249.939
355	0.91553	1.43433	-0.15259	0.03052	5.06592	11.0779	14.5874	16.7236	40.3442	67.9321	109.589	143.036	166.473	230.804
355.5	1.06812	1.43433	0.21362	0.7019	5.0354	10.8032	11.0168	25.6348	45.4712	63.4155	108.978	122.253	162.964	229.614
356	0.94604	0.45776	0.27466	0.54932	5.85937	11.9934	12.9395	24.9939	54.9927	72.2046	99.9756	138.336	182.526	231.873
356.5	1.12915	0.73242	0.27466	0.21362	3.54004	11.1389	10.8032	24.8718	54.9011	69.2749	100.128	158.875	184.204	246.46
357	1.2207	0.57983	-0.85449	2.65503	2.83813	8.8501	10.0708	23.2239	39.2151	74.3713	97.1985	156.342	189.148	238.525
357.5	0.67139	1.49536	-0.57983	4.08935	3.20435	8.11767	11.4746	23.2239	39.6728	64.0259	92.9565	149.963	194.244	224.487
358	0.76294	0.67139	0	2.74658	2.41089	5.67627	12.3291	28.2288	36.0413	64.8193	84.6252	146.088	190.735	243.103
358.5	0.61035	0.88501	-1.06812	2.9602	2.74658	5.24902	9.91821	28.717	33.2336	68.4204	92.9565	152.832	177.887	235.535
359	1.19019	0.48828	-0.33569	1.58691	3.20435	7.50732	10.6812	21.637	24.6887	73.0591	95.9167	171.631	146.851	255.31
359.5	0.82397	0	-0.48828	-0.64087	2.92969	9.00268	8.72803	30.5786	32.5928	65.8264	108.643	150.635	159.119	269.44
360	0.15259	0.88501	-2.2583	-0.09155	4.54712	9.06372	10.7117	23.6816	24.6277	75.0732	93.4448	172.821	147.217	250.061
360.5	-0.15259	0.48828	-0.76294	0	3.78418	10.8337	8.48389	24.353	37.5061	86.3342	110.596	165.955	162.262	239.319
361	0.73242	-0.30518	-0.79346	-0.57983	2.86865	11.322	10.7727	28.9001	35.4919	84.9304	115.265	167.236	188.324	233.459
361.5	-0.09155	-0.03052	-0.97656	-0.67139	2.59399	11.6882	8.48389	28.5645	42.572	81.3293	107.513	166.443	194.611	233.124
362	0.21362	-0.21362	-0.48828	0.18311	1.40381	9.30786	9.67407	24.353	36.499	76.1719	112.091	157.074	189.88	212.585
362.5	0.48828	0	-0.24414	0.5188	1.80054	8.97217	7.2937	31.7383	42.3584	74.2493	117.34	149.17	204.437	223.328
363	0.64087	-0.15259	-0.91553	-0.73242	2.01416	8.36182	10.3149	27.8931	33.3862	77.6977	116.089	149.902	202.423	245.3
363.5	0.57983	1.0376	-0.64087	-0.82397	1.40381	7.96509	14.4043	23.8953	29.48	72.4487	114.594	159.821	190.613	250.122
364	0.88501	-0.27466	-0.7019	-0.21362	1.64795	8.27026	12.085	28.5645	37.5061	80.9326	113.525	156.677	188.354	243.927
364.5	0	0.12207	-0.88501	-0.15259	2.56348	7.08008	15.2283	25.1465	46.1731	66.9556	101.776	128.326	173.401	240.692
365	0.36621	0.48828	-0.03052	-0.57983	2.74658	4.97436	13.092	27.832	41.5039	71.9604	102.844	134.979	170.868	250.977
365.5	0.64087	-0.09155	-0.76294	0.30518	2.83813	4.66919	11.0474	24.9634	38.6658	78.0029	107.574	146.088	191.071	238.312
366	1.00708	0.03052	-0.54932	-0.09155	2.80762	6.80542	12.3596	23.4375	36.0718	70.5566	97.3205	150.818	193.787	238.983
366.5	0.88501	0.88501	-0.67139	0.7019	3.20435	5.15747	10.2844	25.5432	36.9263	63.324	105.316	132.904	202.667	210.632
367	1.06812	-0.18311	0.12207	1.64795	4.88281	5.34058	10.5896	27.5268	29.2664	60.3943	97.0764	138.733	174.103	243.134
367.5	1.00708	1.06812	0	1.15967	4.97436	5.5542	10.7422	27.1912	31.6772	61.4624	90.1184	145.142	193.42	249.634
368	0.94604	0.76294	-0.61035	1.5564	4.11987	5.95093	10.5896	22.0947	35.4309	65.7959	79.2541	157.562	200.653	252.808
368.5	1.00708	1.28174	-0.03052	0.91553	2.74658	7.90405	10.6201	18.5547	37.6282	66.3147	88.1042	153.839	175.781	234.405
369	1.25122	1.49536	-0.18311	0.09155	2.89917	6.65283	8.11767	21.5454	32.5622	57.251	94.4519	154.755	165.436	214.752
369.5	1.70898	1.43433	-0.45776	-0.06104	1.95312	6.74438	8.45337	27.9846	34.8205	50.5676	102.539	137.756	162.109	223.999
370	1.28174	1.12915	-0.27466	0.57983	3.84521	8.20923	11.1389	20.7825	31.0364	67.1692	96.2219	147.919	161.53	244.904
370.5	1.06812	0.42725	0.12207	0.21362	4.39453	14.3127	11.9934	20.874	37.6282	69.2139	97.168	136.597	159.454	236.084
371	1.15967	1.58691	0.09155	0.36621	3.50952	14.679	13.4277	24.0784	33.2336	74.6765	92.5598	130.188	135.071	237.152
371.5	0.82397	0.73242	0.18311	-0.45776	3.479	10.0098	10.0708	25.0244	37.384	66.1316	98.6633	108.032	137.756	223.877
372	0.39673	0.5188	0.61035	0.82397	2.53296	10.7422	9.76562	32.2571	37.1704	72.5403	96.7102	114.075	161.499	219.452
372.5	1.67847	0.45776	0.54932	0.42725	4.05884	9.58252	13.4582	28.2898	35.8276	63.7512	89.8743	120.636	162.903	200.043
373	1.40381	0.57983	-0.18311	0.79346	1.64795	11.1389	12.8784	27.8015	42.3889	75.2869	94.3909	128.052	177.185	202.118
373.5	0.88501	0.21362	0.15259	1.43433	2.56348	11.3831	10.5591	31.5247	38.5437	59.2041	103.943	142.029	175.598	205.139
374	1.19019	0.82397	-0.09155	1.89209	1.92261	12.5427	10.6201	32.5317	46.1731	54.718	117.371	145.996	172.058	188.721
374.5	0.97656	0.33569	0	0	1.5564	12.8784	9.73511	29.1748	38.0554	58.6243	108.917	139.282	165.253	194.946
375	0.06104	-0.42725	-0.94604	0.54932	2.65503	11.9018	9.49097	25.8179	42.2974	51.4832	94.7571	131.042	160.278	184.601
375.5	0.39673	-0.36621	-0.18311	0.12207	2.53296	11.8713	13.3057	25.4517	38.8794	58.3191	93.689	134.46	147.125	184.479
376	0.57983	0.27466	-0.33569	-0.39673	1.58691	6.92749	18.9514	24.6582	39.4897	67.2913	111.511	140.655	157.196	202.362
376.5	-0.09155	0.24414	-1.00708	-0.24414	1.15967	6.56128	19.3176	24.292	37.4451	71.8384	127.411	145.02	172.119	230.652
377	-0.21362	-0.12207	-1.00708	-1.00708	1.06812	5.7373	13.3972	25.6043	38.1775	61.0352	125.702	139.648	176.514	214.264
377.5	0.12207	0	-1.12915	-1.31226	0.91553	7.14111	14.1296	19.5923	34.8205	59.3262	132.08	124.908	176.117	198.425
378	0.12207	0	-0.76294	-1.06812	2.04468	7.1106	17.273	19.8059	38.147	63.2019	124.878	148.956	176.91	213.409
378.5	0.03052	0.30518	-0.88501	-0.03052	1.5564	7.87353	13.2446	22.0337	34.729	62.5	125.763	130.981	176.819	237.03
379	0	0.18311	0.18311	-0.61035	1.46484	9.12475	11.8103	21.1182	33.6304	64.9719	110.291	125.275	175.903	227.905
379.5	0.42725	0.09155	-0.7019	-0.79346	1.95312	7.62939	10.1623	21.759	29.8767	64.3921	110.474	119.141	163.177	234.009
380	0.85449	-0.30518	0.39673	0.15259	1.89209	10.498	11.1084	22.0947	32.1655	55.9997	120.178	102.356	185.883	214.539
380.5	-0.03052	0.15259	0.27466	-0.48828	5.43213	8.8501	15.0452	20.813	34.3628	66.4062	116.76	117.096	186.279	232.758
381	0.45776	0.85449	0.03052	1.12915	5.24902	9.3689	20.1721	20.7825	32.9895	67.5354	121.033	112.549	172.882	264.221
381.5	0.36621	-0.36621	-0.61035	1.49536	6.53076	11.3831	19.104	15.3198	34.3017	63.4766	112.854	121.307	154.785	252.411
382	0.24414	0.45776	1.70898	-0.36621	4.82178	7.84302	15.8386	18.8599	44.1895	68.6951	107.758	127.136	156.219	204.651
382.5	1.34277	0.12207	0	1.12915	1.95312	5.34058	16.8762	20.0806	45.4712	81.2378	119.354	125.244	178.223	229.156
383	0.27466	0.36621	-0.57983	0.76294	2.16675	5.85937	13.6719	23.8953	40.4053	67.5354	99.3652	136.627	163.391	223.206
383.5	-0.21362	0.18311	-0.39673	-0.24414	3.479	6.01196	9.76562	28.3203	38.4216	68.7866	115.356	142.426	164.185	236.42
384	0.82397	0	-0.82397	0.79346	2.83813	7.72095	11.322	24.0784	33.8135	51.3611	120.483	149.841	189.209	215.546
384.5	0.54932	0	-0.36621	0.18311	2.31934	5.49316	10.0708	24.1699	34.9121	42.9688	123.566	158.325	191.315	240.662
385	1.37329	0.24414	-0.45776	0.73242	2.65503	7.35474	14.4348	27.832	35.3394	39.978	113.403	130.951	202.27	237.122
385.5	0.42725	0.54932	-1.06812	1.64795	3.08228	7.44629	10.5286	24.8718	32.9895	46.1731	102.844	150.665	192.627	247.162
386	0.42725	0.5188	-0.09155	0.79346	3.78418	6.95801	10.8643	25.8789	34.8816	57.9529	91.095	144.44	183.685	229.858
386.5	0.21362	-0.06104	-0.33569	0.5188	3.90625	7.75146	12.2681	16.3879	30.6702	59.6008	93.8415	141.754	179.84	247.559
387	0.42725	0.06104	0.12207	0.18311	4.21143	8.36182	13.9465	16.8152	33.0505	64.3921	108.795	137.909	201.813	254.608
387.5	1.2207	0.39673	0.30518	0.45776	5.37109	5.92041	17.2119	18.4021	34.8205	72.6929	113.556	137.878	205.2	238.556
388	0.33569	1.37329	0.30518	0.57983	6.04248	9.91821	13.6414	24.7803	32.074	67.5964	119.202	148.132	222.565	241.333
388.5	0.94604	0.15259	0.21362	-0.06104	5.46265	8.72803	15.0757	27.6184	29.6936	66.803	121.643	132.141	187.744	225.433
389	0.88501	0.82397	0.18311	0.7019	4.85229	11.9018	14.4653	23.7732	38.1775	62.1033	101.379	131.653	182.678	233.917
389.5	1.19019	0.57983	-0.27466	-0.42725	6.04248	10.9253	13.916	28.9917	34.0271	71.8079	94.9707	131.775	183.166	248.352
390	1.34277	0.21362	0	1.25122	5.18799	8.97217	11.6577	26.4587	35.3088	62.8967	101.593	128.235	181.824	239.41
390.5	1.28174	0.94604	-0.7019	-0.33569	3.60107	8.39233	11.5662	26.3977	38.3606	66.8945	104.614	115.875	187.988	232.33
391	1.70898	0.57983	-0.27466	0	4.27246	10.498	12.085	24.6887	36.5906	71.5027	97.1374	127.441	172.089	221.405
391.5	-0.12207	-0.36621	-0.30518	0.21362	4.42505	6.89697	11.4746	26.3367	36.8347	68.2678	107.208	149.017	176.91	235.382
392	-0.15259	-0.15259	-1.15967	0.06104	4.36401	7.65991	13.1531	22.1252	38.7878	73.2422	116.486	136.749	180.389	220.123
392.5	0	0.12207	-0.64087	-0.39673	2.44141	6.50024	13.0005	21.0266	40.6189	57.4951	101.959	124.207	175.201	239.166
393	-0.24414	-1.00708	-0.64087	0.57983	3.32642	6.53076	14.679	26.4282	41.1072	60.4858	105.774	111.481	177.093	248.352
393.5	0.48828	-0.42725	-1.0376	-0.57983	3.60107	7.44629	10.2844	24.3835	36.6516	65.155	112.579	116.547	185.089	237.213
394	-0.61035	-0.45776	-1.28174	-0.30518	3.93677	6.13403	8.78906	24.0479	33.783	64.209	114.96	126.648	192.413	222.076
394.5	-0.06104	-0.82397	-0.54932	-0.76294	3.96728	4.73022	13.1226	17.9443	38.6658	62.1948	100.098	130.157	182.312	228.638
395	-0.5188	-1.15967	-1.25122	0	4.60815	6.31714	12.085	19.5007	34.7595	61.8286	119.049	114.777	189.117	215.79
395.5	0.54932	0.27466	-0.82397	0.18311	3.23486	8.69751	11.0474	19.4092	35.8887	69.458	106.201	115.936	187.164	238.953
396	-0.54932	-0.21362	-0.94604	0.21362	2.41089	8.57544	14.9231	21.3013	37.323	65.0635	96.344	131.287	204.163	235.84
396.5	0.33569	0.88501	0.21362	0.30518	1.61743	7.26318	15.3809	22.4304	33.02	73.7305	96.1609	129.425	197.906	217.987
397	0.03052	0.67139	-0.45776	-0.09155	0.97656	7.35474	14.8926	20.6604	30.2429	67.7795	84.5642	124.573	181.915	236.755
397.5	0.5188	0.24414	-0.48828	-0.24414	1.12915	8.45337	13.3667	16.2048	32.7454	56.427	101.746	115.204	191.925	230.225
398	0.15259	-0.09155	-0.79346	-1.06812	1.12915	10.1929	11.0168	17.3035	37.2009	62.3169	98.3276	113.312	170.837	231.171
398.5	0.54932	-0.30518	-0.67139	-0.73242	2.41089	7.69043	13.092	21.2402	35.8276	66.2231	94.2078	107.849	170.258	233.368
399	0.57983	0.79346	-0.5188	0.15259	3.69263	6.92749	13.855	19.6838	40.7715	60.6995	83.1909	113.556	174.438	218.262
399.5	-0.27466	0.91553	-0.03052	-0.03052	4.39453	9.49097	10.437	16.6931	37.323	68.9087	85.9375	128.693	189.545	239.319
400	0.82397	0	-0.42725	0.54932	2.86865	11.8713	13.2446	19.2566	28.3814	53.5889	101.715	138.367	180.908	236.786
400.5	0.76294	0.12207	0.06104	0.21362	5.12695	11.1999	14.2212	20.9656	26.947	53.009	88.5925	108.032	179.474	225.769
401	0.39673	-0.18311	-0.5188	-0.67139	8.11767	10.8337	14.9841	23.0713	28.4729	56.0608	77.8503	95.5811	186.645	235.87
401.5	0.54932	0.64087	-0.06104	-0.45776	5.34058	6.50024	13.0615	20.4163	35.4004	58.258	96.1914	108.215	179.352	263.55
402	0.76294	0.33569	-0.79346	0.18311	3.54004	7.75146	15.625	20.6299	40.2527	57.4646	113.434	99.5178	171.905	234.07
402.5	0.91553	0.45776	-0.48828	0.24414	3.54004	6.16455	18.4936	21.3013	40.6189	54.657	90.6372	109.924	166.962	219.604
403	0.88501	-0.03052	-0.18311	-0.06104	4.21143	5.37109	12.4512	21.759	37.4451	47.9736	84.259	104.889	161.713	221.405
403.5	0.88501	0.15259	-0.61035	0.97656	2.7771	9.79614	10.2539	20.5994	35.9802	43.8538	85.2966	114.655	163.818	229.279
404	1.12915	1.34277	0.24414	1.15967	2.28882	8.42285	9.97925	20.6909	40.0085	57.1289	91.5527	108.673	162.628	235.962
404.5	1.5564	1.28174	0.06104	1.28174	4.85229	8.36182	13.6414	17.4866	46.0815	50.6897	93.75	102.966	192.749	237.427
405	0.85449	1.19019	-0.09155	3.54004	5.18799	8.11767	13.9465	22.7356	46.0815	48.1262	92.7124	111.084	188.599	232.941
405.5	1.77002	1.34277	1.0376	3.57056	3.90625	6.073	9.33838	25.7263	48.8892	53.6804	91.7969	113.281	187.286	243.713
406	0.30518	1.0376	1.61743	1.95312	3.75366	7.59888	9.30786	24.231	40.741	51.7273	91.0339	114.563	157.867	229.248
406.5	0.24414	0.61035	-0.30518	3.54004	3.9978	8.5144	11.1084	23.3154	34.2407	53.2532	90.271	119.934	203.155	230.621
407	0.88501	1.46484	0.48828	2.0752	4.11987	8.30078	14.0381	22.9492	35.5225	57.0374	67.9321	129.73	202.24	236.145
407.5	0	1.98364	0.61035	1.80054	2.71606	6.22559	12.7869	19.2261	42.9382	62.3169	67.4133	129.761	196.777	221.68
408	0.82397	1.28174	-0.54932	1.25122	2.71606	7.41577	9.12475	21.0266	35.4919	62.5305	81.0242	105.072	196.808	233.612
408.5	0	0.73242	-0.64087	1.40381	4.76074	6.5918	8.75854	25.2686	31.3721	56.7017	86.4563	130.493	156.555	245.117
409	-0.7019	0.54932	-0.27466	-0.18311	3.26538	6.40869	9.39941	20.9961	39.2151	55.0537	74.7681	131.134	177.948	228.394
409.5	-0.21362	0.7019	0.09155	-0.5188	4.57764	5.31006	10.0708	25.8789	31.9214	59.7839	66.8945	116.608	186.859	216.919
410	0.76294	0.76294	0.09155	1.0376	4.66919	5.49316	12.5427	26.5808	39.0015	53.6499	68.6035	123.566	193.909	212.616
410.5	0.73242	0.09155	0.5188	-0.15259	0.88501	6.56128	12.6648	30.7617	42.2668	47.5769	74.4018	109.894	194.244	223.633
411	0	0.27466	-0.5188	-1.00708	1.92261	6.37817	11.7493	28.4424	48.1872	60.8826	87.3413	124.908	185.883	224.365
411.5	-0.79346	-0.45776	-0.36621	-0.27466	1.98364	6.22559	11.2915	21.3013	50.0793	56.7322	83.313	134.705	168.488	202.85
412	0.09155	0.33569	-1.09863	0.24414	3.17383	5.46265	10.7727	19.2871	41.1987	59.4482	71.228	135.742	161.011	229.34
412.5	0.12207	1.19019	-0.7019	0.09155	3.54004	6.7749	10.9253	24.4446	37.1094	58.8074	74.2798	118.713	172.15	237.03
413	-0.21362	0.33569	-0.91553	0.09155	2.16675	6.62231	9.00268	25.3296	29.6936	59.845	73.9136	136.627	185.608	226.013
413.5	0.82397	0.45776	-0.39673	0.27466	1.95312	8.45337	7.62939	14.9231	29.2664	55.9082	79.1016	132.69	194.916	240.875
414	0.64087	0.21362	-0.88501	0.33569	3.38745	9.21631	9.67407	16.6626	32.074	59.5703	82.55	136.749	193.451	214.661
414.5	-0.27466	0.36621	-0.97656	0.79346	3.8147	5.37109	9.30786	20.2942	39.7949	54.3213	81.4819	134.216	190.186	211.945
415	1.15967	0.82397	-1.2207	1.40381	3.54004	7.62939	10.6812	17.8223	35.3088	63.6292	91.7053	137.177	186.249	205.414
415.5	1.49536	0.36621	-0.67139	0.85449	4.91333	5.18799	8.17871	19.6838	38.1165	64.3921	91.7358	130.31	191.101	202.026
416	0.73242	-0.45776	0.12207	-0.21362	1.67847	5.7373	8.88061	24.2004	41.6565	65.0635	96.0388	132.294	188.568	186.554
416.5	0.57983	0.30518	-1.19019	-0.36621	3.05176	9.30786	10.6506	26.0315	42.9993	56.8848	97.9614	139.16	183.136	195.801
417	0.18311	0.03052	-0.88501	-0.24414	4.57764	5.40161	12.2986	26.4893	45.6848	52.6733	68.2983	129.303	196.472	211.853
417.5	1.34277	0.03052	-1.64795	-0.48828	3.50952	7.69043	14.0381	29.4189	45.8984	54.718	78.3081	121.948	177.704	209.442
418	0.57983	0.64087	-0.48828	0.12207	3.17383	6.7749	13.916	27.8015	39.7339	65.3686	85.8154	133.881	178.619	218.933
418.5	0.79346	0.24414	-0.85449	0.21362	4.48608	6.16455	12.146	34.4543	40.5273	62.2559	75.2869	140.015	170.471	214.935
419	0.36621	0.73242	-0.39673	-0.06104	3.90625	7.90405	13.2446	34.8816	37.0178	61.8896	80.9326	123.474	195.831	213.989
419.5	0.67139	0.76294	0.21362	0.30518	2.86865	7.50732	13.7939	26.123	32.8674	65.3686	81.604	130.981	196.747	216.949
420	0.12207	-0.82397	-0.39673	1.77002	4.05884	8.88061	11.0474	23.6816	38.6963	59.0515	90.5456	131.103	187.317	216.492
420.5	0.42725	1.09863	-0.36621	1.0376	3.66211	9.21631	11.8713	22.4915	36.1938	67.0776	82.428	131.103	201.324	208.435
421	1.83105	1.46484	-0.09155	0.73242	3.75366	6.50024	13.2141	26.9165	39.9475	68.512	85.3882	119.72	218.048	221.039
421.5	0.61035	0.76294	-0.57983	4.24194	2.74658	6.16455	17.4866	27.2217	31.4941	79.9866	88.8061	119.446	194.58	213.989
422	1.5564	1.19019	-0.24414	0.67139	2.19727	5.5542	15.5945	26.001	35.8887	73.6694	107.086	101.257	193.726	227.081
422.5	1.52588	1.0376	-0.24414	1.52588	3.35693	6.28662	15.686	24.231	44.7693	70.1599	110.291	112.549	186.279	216.644
423	1.64795	0.57983	0.57983	1.7395	3.38745	5.98144	13.4277	27.0691	41.5344	66.4673	99.884	117.126	177.093	196.564
423.5	0.48828	1.00708	0.24414	1.92261	3.87573	7.84302	11.3525	22.7661	38.9404	60.852	98.2056	129.089	186.951	205.872
424	-0.15259	1.06812	-0.36621	0.85449	1.83105	6.34766	11.2915	23.5901	42.45	49.7131	98.7854	114.96	186.584	207.55
424.5	0.36621	1.15967	-0.12207	-0.30518	2.10571	5.64575	11.7798	19.0735	41.3208	55.9997	98.2056	123.322	172.943	198.608
425	-0.09155	0.73242	-0.88501	0.27466	2.92969	6.95801	11.1084	16.8457	33.6304	54.2297	97.3816	120.087	188.08	209.015
425.5	0.30518	0.18311	-0.09155	0.21362	2.16675	10.7422	11.9018	19.2261	29.7241	56.8848	72.6318	104.98	189.392	224.213
426	0.42725	0.36621	-0.18311	1.46484	1.5564	7.8125	12.3596	20.3552	38.1165	55.6641	86.2732	111.45	180.939	225.098
426.5	0.57983	-0.5188	0.42725	-0.15259	1.43433	10.8032	10.1013	22.2473	38.4827	50.9949	79.4067	107.117	177.307	223.236
427	-0.64087	0.45776	-0.33569	1.06812	2.56348	11.5662	9.88769	18.7988	35.0037	56.8848	68.1763	138.763	168.304	211.456
427.5	-0.5188	0.73242	-0.5188	0.61035	2.7771	10.3149	9.0332	13.4277	31.7688	55.8777	89.0808	114.075	165.131	209.045
428	-0.21362	0.24414	-0.85449	0.61035	2.50244	5.52368	11.4746	14.0076	31.7688	53.1006	91.0034	128.204	181.549	223.816
428.5	0.03052	0.45776	-0.18311	-0.06104	3.479	5.12695	11.5051	19.928	45.3491	46.936	88.0127	129.578	184.174	221.252
429	-0.21362	0.21362	-1.15967	0.03052	4.82178	5.40161	12.7258	19.5923	38.8489	47.0886	96.5271	127.777	173.035	230.255
429.5	0.21362	0.79346	-0.76294	0.15259	5.31006	6.2561	14.5874	21.3318	45.0439	48.706	99.4263	144.531	164.062	258.545
430	0	0.30518	-1.09863	0.7019	5.82886	6.89697	11.4441	21.6675	39.4592	40.6494	92.8345	122.162	155.945	266.388
430.5	0.48828	0.06104	-0.73242	1.95312	4.85229	7.59888	13.9771	21.1487	36.9263	36.9263	86.9751	122.131	159.058	235.657
431	0.67139	0.88501	-0.79346	1.25122	3.72314	6.22559	12.7869	20.6604	44.8303	45.6238	81.6955	123.901	177.826	227.02
431.5	0.85449	0.57983	-1.28174	0.24414	4.45557	7.17163	14.0381	23.9563	45.8374	55.7861	102.295	115.387	184.082	238.77
432	0.24414	-0.42725	-0.73242	0.39673	3.479	4.57764	13.7329	28.5339	54.779	52.7344	110.992	102.814	184.082	236.694
432.5	0.73242	0.76294	-0.67139	0	3.50952	4.79126	13.5193	30.426	56.5491	62.7441	110.626	118.164	171.02	250.366
433	0.82397	0.54932	-0.73242	0.36621	2.34985	4.76074	12.1155	26.5503	41.2292	78.9795	102.753	123.84	166.351	238.098
433.5	0.03052	0.67139	-0.5188	0.15259	3.87573	5.0354	10.498	22.7966	40.3137	62.0727	94.6045	121.918	176.422	228.058
434	1.0376	0.67139	-0.48828	0.09155	1.89209	4.42505	9.12475	23.3765	43.2129	49.3164	87.1277	120.026	176.147	235.84
434.5	0.5188	0.7019	-1.7395	0.18311	3.32642	5.67627	9.27734	21.8811	41.8701	39.7339	86.6394	135.742	173.126	220.917
435	0.15259	1.12915	-0.97656	0.91553	3.8147	6.56128	13.7329	21.5149	45.9595	57.8613	97.3205	130.432	189.697	206.848
435.5	0.94604	0.57983	-1.0376	-0.5188	2.99072	9.94873	14.5569	24.7497	36.8347	60.4553	108.673	137.695	172.76	202.148
436	0.09155	1.15967	-0.27466	-0.03052	2.53296	12.4817	11.2915	24.9939	41.4734	50.3845	112.671	131.012	165.68	191.681
436.5	0.39673	0.33569	-1.77002	0.39673	2.22778	8.8501	10.2844	20.0195	38.9099	47.2107	117.859	138.336	173.95	227.57
437	0.15259	0.57983	-1.40381	0.30518	3.84521	7.32422	13.6719	25.116	43.8538	60.1501	121.49	159.119	162.476	222.473
437.5	1.12915	1.5564	-1.28174	0.85449	4.05884	6.56128	12.085	18.5242	38.0859	54.1687	94.2688	160.858	167.725	223.022
438	0.94604	0.48828	-1.25122	1.25122	2.56348	7.32422	9.94873	19.4092	44.6167	56.0608	82.7637	153.198	180.603	226.776
438.5	1.00708	0.73242	-0.76294	0.12207	1.98364	8.3313	18.4021	23.1018	41.2598	56.8237	96.1609	137.299	171.875	238.77
439	2.7771	0.64087	-1.83105	0.39673	2.38037	10.4065	15.8386	21.5149	38.147	57.4036	93.0786	128.967	194.672	236.298
439.5	1.19019	0.33569	-1.67847	0.97656	3.72314	9.64355	17.5781	35.614	33.3557	68.1457	95.9473	134.705	196.564	223.633
440	1.19019	0.64087	-1.37329	0.64087	2.80762	10.1929	16.1438	39.032	37.5366	66.8335	95.6421	135.651	195.435	244.812
440.5	1.2207	1.31226	-1.2207	0.06104	2.34985	13.1531	16.1743	34.7595	35.3394	60.8826	90.5456	118.164	196.106	263.611
441	0.91553	0.42725	-1.00708	-0.7019	1.19019	14.801	18.7988	31.9214	36.2549	47.1191	78.186	129.974	194.092	230.774
441.5	1.00708	-0.30518	-1.06812	0.67139	2.19727	13.916	16.449	22.3084	38.5437	51.7883	89.8437	130.707	188.751	214.935
442	0.36621	-0.09155	-1.67847	0.91553	3.35693	10.2844	16.449	22.0032	36.0413	55.3894	85.9985	117.798	185.089	229.553
442.5	0.45776	0.09155	-1.06812	0.61035	3.60107	10.376	15.0757	27.832	38.7878	53.5889	80.4749	134.064	181.366	219.055
443	-0.42725	0.09155	-0.94604	-0.45776	3.78418	10.4675	11.2305	30.1514	35.5225	57.373	78.7659	138.275	193.268	220.795
443.5	-0.09155	-0.48828	-1.25122	-0.64087	3.87573	8.27026	9.30786	32.1045	35.3394	54.6265	83.0078	139.557	205.383	212.769
444	-0.03052	-0.67139	-1.0376	-0.7019	4.45557	8.20923	11.9324	31.1279	38.8184	46.7834	87.1582	142.761	201.019	232.697
444.5	-0.09155	-0.33569	-0.7019	-0.54932	2.86865	14.6179	10.9558	34.4238	41.5039	49.1028	91.6748	154.297	198.12	222.198
445	0.18311	-0.09155	-0.97656	0.91553	2.65503	15.7471	13.7939	30.1209	43.9453	45.5017	89.9353	145.081	202.606	240.662
445.5	0.30518	0	-1.52588	0.91553	3.32642	14.6179	14.0381	28.2288	43.2434	53.4363	87.2192	143.097	215.088	216.4
446	0.64087	0	-1.34277	0.91553	3.35693	13.3057	13.7329	27.0691	43.3655	53.1616	102.448	149.597	194.519	200.958
446.5	1.09863	0.18311	-0.91553	1.86157	3.54004	12.0544	15.564	26.1841	46.936	58.6548	102.264	156.158	177.978	211.365
447	0.39673	-0.09155	-0.30518	0.18311	2.71606	8.11767	12.6343	22.7356	42.9382	45.8374	114.227	166.138	182.8	207.794
447.5	0.45776	0.33569	-1.52588	0.79346	1.95312	9.42993	11.7493	22.522	44.1589	51.4832	101.257	158.508	201.813	229.309
448	1.12915	0.61035	-0.94604	0.45776	3.35693	8.94165	11.4136	23.0408	44.4336	45.5322	101.105	153.625	190.765	247.406
448.5	0.76294	0.03052	-0.61035	1.06812	1.49536	6.5918	11.2915	25.5737	39.917	50.8728	110.199	141.724	180.45	231.903
449	0.5188	1.00708	-0.85449	1.49536	1.70898	8.48389	13.3362	25.7873	43.5181	46.1121	120.483	139.16	202.576	221.558
449.5	-0.21362	1.46484	-0.73242	0.91553	2.41089	7.75146	13.4277	23.0102	39.3066	45.7458	109.161	135.62	212.341	211.822
450	0.03052	0.79346	-0.73242	1.70898	2.13623	8.57544	14.1907	31.2195	35.9192	44.4641	99.4263	140.228	210.297	206.909
450.5	0.7019	1.46484	-1.0376	1.28174	2.99072	7.53784	10.7727	35.1257	40.2832	46.1426	81.0242	161.255	191.956	211.151
451	0.61035	0.88501	-1.89209	0.79346	3.17383	7.8125	13.2752	32.7148	39.3982	40.3442	95.7642	150.787	183.99	209.991
451.5	0.73242	0.45776	-1.86157	0.39673	3.08228	6.89697	17.9748	31.25	44.8608	38.0249	95.9167	132.202	197.906	210.358
452	0.5188	0.73242	-1.67847	0.76294	2.50244	5.27954	20.813	33.1116	40.8935	38.9709	98.999	137.756	206.879	187.469
452.5	0.06104	0.7019	-0.97656	0.42725	1.86157	5.21851	14.8926	34.2712	36.5295	55.3589	100.281	137.146	203.369	230.377
453	0.45776	0.97656	-1.28174	0.36621	2.22778	4.97436	14.4348	33.1726	39.8559	49.2554	114.41	126.526	167.297	234.863
453.5	1.46484	0.64087	-1.06812	0.76294	2.41089	6.56128	13.3972	24.4751	36.3159	52.9175	114.899	142.426	171.417	222.412
454	1.28174	0.21362	-0.5188	1.06812	2.92969	7.38525	9.52148	22.644	32.0129	62.4084	111.938	129.608	189.331	227.783
454.5	1.86157	1.25122	-0.54932	0.12207	3.50952	5.7373	14.4348	25.4211	37.2314	65.6433	101.41	129.028	208.496	224.213
455	1.19019	0.67139	0.24414	0.5188	6.74438	6.53076	11.0474	27.3132	50.9033	59.8755	106.232	116.791	202.82	215.179
455.5	0.61035	1.43433	0.85449	2.0752	4.30298	6.31714	13.092	29.5105	47.9126	64.7278	114.166	109.07	211.853	231.689
456	1.2207	1.06812	0.48828	1.40381	4.54712	7.20215	16.9678	25.0855	49.3469	62.7441	118.073	137.817	196.655	221.893
456.5	0.88501	1.09863	-0.61035	0.5188	3.8147	5.34058	17.3035	27.2827	47.3938	64.8804	118.469	148.041	172.333	236.053
457	1.31226	-0.06104	0.48828	0.73242	4.27246	8.05664	13.5803	31.7688	35.4614	60.5774	108.276	162.964	155.334	207.733
457.5	1.28174	0.18311	-1.09863	1.80054	2.34985	7.41577	13.7024	29.2969	49.9878	61.4624	115.845	140.625	174.072	220.184
458	0.88501	-0.03052	-1.09863	0.48828	1.98364	6.40869	17.273	25.3601	49.3774	69.2749	101.562	134.583	169.281	228.76
458.5	0.7019	1.31226	-0.09155	-0.45776	2.71606	7.14111	16.6321	23.8953	47.699	71.106	100.8	135.162	186.676	238.922
459	0.36621	0.36621	-1.12915	-0.21362	2.0752	7.20215	14.5874	22.3389	39.8865	64.7583	86.9141	131.989	205.2	233.093
459.5	0.36621	0	-0.73242	0.27466	3.38745	5.58472	15.0146	22.5525	34.1492	57.8308	96.1304	142.181	185.425	224.579
460	0.48828	0.61035	-0.97656	-0.48828	2.74658	4.88281	18.6462	18.7683	40.4968	56.8542	96.5576	155.457	192.963	233.154
460.5	0.85449	0.36621	-0.7019	-0.39673	2.34985	4.91333	16.571	26.9775	39.3372	71.167	107.91	141.083	194.733	212.036
461	-0.61035	1.37329	-0.91553	-0.48828	3.17383	7.26318	17.8528	29.3579	33.3862	77.0569	89.8743	131.409	193.054	212.708
461.5	0.06104	-0.09155	-1.58691	-0.57983	2.62451	4.48608	16.2048	26.0315	34.5764	70.6482	86.9141	113.953	182.19	230.438
462	-0.61035	-0.27466	-0.03052	-0.09155	3.23486	5.85937	17.6697	28.3203	32.2876	56.8237	84.9915	133.606	170.166	236.877
462.5	0.06104	0.30518	-0.64087	-0.54932	2.01416	9.39941	16.0217	29.7852	30.304	56.1218	83.313	115.997	176.086	239.868
463	-0.03052	0.79346	-0.18311	-0.03052	2.59399	9.00268	13.0615	30.8533	32.135	69.7937	90.332	119.537	165.222	218.903
463.5	0.12207	0.64087	-0.30518	-0.54932	1.58691	8.14819	10.3455	35.0952	33.5083	78.186	90.6982	126.526	195.496	213.135
464	0.7019	-0.03052	-0.91553	-0.76294	2.16675	5.31006	14.9841	30.3345	38.1165	66.6199	75.2258	148.315	220.276	216.888
464.5	0	0.42725	-0.64087	-0.15259	4.02832	6.10352	14.4043	31.7383	37.0789	72.6013	91.0339	150.97	208.496	204.071
465	0.5188	0	-1.31226	-0.24414	3.78418	5.09644	16.2354	34.5764	38.8489	65.3992	100.677	153.015	187.561	208.679
465.5	0.5188	-0.88501	-0.64087	0.48828	4.57764	7.23267	16.6016	32.959	44.7388	66.5893	117.004	135.315	196.716	214.02
466	1.0376	0.64087	-0.61035	0.03052	3.26538	11.1084	15.3809	23.3459	41.0461	71.8384	100.311	144.592	171.936	229.614
466.5	1.06812	-0.21362	-0.21362	-0.76294	1.83105	13.3362	15.3503	28.6255	42.0532	64.7278	93.689	162.781	175.262	248.505
467	0.88501	0.36621	-0.54932	-0.36621	1.83105	12.5732	16.9678	38.5742	45.5322	68.634	103.882	153.351	176.514	251.099
467.5	0.67139	0.09155	-0.61035	0.76294	2.59399	10.4675	17.4255	32.898	41.5344	65.7349	89.8132	149.353	213.562	251.282
468	1.64795	-0.18311	-1.12915	1.09863	3.17383	5.49316	13.9465	31.189	29.4189	71.6248	87.4634	158.386	219.055	233.704
468.5	1.2207	0.18311	-0.24414	0.18311	1.92261	4.18091	12.9395	27.0996	34.1797	73.9746	78.064	153.625	215.759	231.476
469	0.36621	0.94604	-1.19019	0.7019	2.04468	5.06592	11.5356	26.9775	30.5786	69.0002	84.6863	147.644	195.709	211.09
469.5	1.58691	0.42725	-0.57983	1.15967	2.41089	5.46265	12.8174	24.6582	35.8276	73.5779	100.922	165.1	191.467	222.656
470	0.91553	0.36621	-0.54932	1.28174	2.31934	5.98144	9.61304	30.9753	33.4778	64.6057	107.513	172.577	195.312	218.201
470.5	0.57983	1.80054	-0.79346	0.12207	3.87573	8.27026	12.5427	29.3579	31.7383	68.0847	105.133	176.819	191.742	243.072
471	0.76294	0.82397	0.45776	0.73242	2.9602	6.19507	13.5498	24.6277	35.9802	60.3027	108.368	166.779	213.47	226.837
471.5	1.37329	1.0376	-0.54932	-0.03052	2.83813	4.91333	11.0779	27.4658	34.8816	54.3823	112.183	162.811	196.564	216.095
472	1.64795	1.49536	-0.39673	0.27466	2.10571	4.66919	15.2283	29.6326	31.8298	55.4199	107.513	161.621	211.182	220.795
472.5	1.31226	0.94604	-0.06104	0.03052	3.08228	4.18091	10.5591	18.9514	31.8909	65.0329	96.3135	151.733	188.507	221.558
473	0.91553	0.61035	0.27466	1.49536	3.78418	5.43213	12.5732	24.8413	26.001	61.4319	102.814	129.944	204.224	211.151
473.5	0.45776	0.7019	-0.03052	0.91553	2.50244	7.93457	16.3879	26.3061	39.8559	61.615	109.436	128.448	222.961	199.982
474	0.67139	0.33569	0.18311	1.06812	3.2959	7.9956	15.0757	31.5857	38.7878	51.6663	107.117	136.169	216.064	211.487
474.5	0.76294	1.06812	0.12207	1.00708	3.08228	6.7749	11.4746	29.2664	34.9426	54.4739	93.8721	157.288	202.759	211.975
475	-0.03052	0.48828	-0.79346	1.15967	4.05884	6.89697	9.76562	25.9705	38.208	66.1011	100.555	141.235	200.012	205.322
475.5	-0.18311	-0.09155	-0.85449	0.73242	3.87573	6.13403	7.90405	29.3579	38.1775	73.3032	84.2895	150.177	184.479	205.475
476	0.88501	0.73242	-0.94604	1.37329	4.63867	10.6201	7.9956	24.0173	37.6587	73.6694	91.0644	168.396	178.772	203.918
476.5	-0.33569	0.48828	-0.94604	-0.18311	4.30298	8.48389	10.6506	22.4304	44.0674	62.9272	95.2759	158.356	178.955	197.784
477	0.27466	1.28174	-1.61743	0	7.1106	6.50024	9.52148	23.3154	41.5344	66.04	72.6318	153.809	178.07	195.679
477.5	-1.40381	0.15259	-0.97656	0.12207	5.92041	6.50024	12.1155	18.4326	45.0134	68.2983	83.8928	132.324	183.563	202.606
478	0.12207	0.15259	-1.31226	1.12915	5.12695	5.31006	9.94873	20.1416	46.6614	73.3948	98.0225	150.146	167.694	223.45
478.5	-0.30518	-0.88501	-1.06812	1.83105	5.64575	7.93457	12.1155	27.6794	45.7153	66.2231	104.98	151.031	175.018	226.135
479	0.06104	0.27466	-0.54932	-0.15259	2.10571	9.24683	13.4888	25.5127	42.8162	61.4319	96.5881	158.813	183.228	233.704
479.5	0.42725	1.0376	-0.18311	1.06812	3.14331	8.94165	10.1623	29.2053	43.5791	61.8896	96.8017	146.24	184.052	216.858
480	-0.09155	0.5188	-0.33569	-0.03052	1.43433	7.32422	11.4441	32.1655	51.3306	61.1877	112.64	137.482	191.772	220.581
480.5	-0.06104	0.45776	-0.7019	-0.09155	1.5564	8.72803	9.00268	27.8931	41.9312	60.5164	106.934	150.024	200.836	197.021
481	0.85449	0.61035	-1.67847	0.09155	2.44141	5.12695	8.02612	34.4238	45.4407	70.2515	96.1304	145.935	200.684	200.806
481.5	0.57983	0.39673	-1.00708	-0.54932	3.60107	5.0354	9.58252	32.135	48.3398	64.4531	92.0715	136.749	167.755	203.888
482	0.85449	1.34277	-0.42725	-0.03052	3.72314	5.70679	8.69751	34.6069	41.8396	62.7136	99.0295	154.846	160.736	191.864
482.5	0.64087	1.34277	-0.67139	0.09155	3.63159	5.46265	10.8643	26.4282	40.1611	53.0701	99.9145	156.769	166.931	191.01
483	1.49536	0.06104	-0.64087	0.27466	3.02124	4.91333	8.36182	27.6489	43.8538	60.7605	90.9119	151.916	182.251	193.939
483.5	1.0376	0.91553	-0.30518	0.73242	2.89917	5.34058	9.70459	31.0059	39.5813	64.209	94.4519	148.59	198.12	184.509
484	0	0.76294	-0.15259	0.15259	3.57056	4.5166	11.8408	35.8887	37.9333	57.6172	105.194	143.036	190.674	192.963
484.5	0.54932	0.36621	0.18311	1.77002	2.50244	5.12695	10.8643	32.1655	40.1306	49.8352	113.373	149.384	163.025	204.62
485	0.5188	-0.33569	-0.48828	1.61743	3.63159	6.01196	10.8643	29.3884	48.3398	47.4548	116.547	146.912	166.473	211.7
485.5	0.27466	0.5188	-0.39673	0.79346	2.44141	6.5918	14.6484	26.2451	47.5159	40.5884	115.051	135.284	170.868	206.085
486	1.46484	0.91553	-0.82397	0.5188	2.04468	8.14819	12.3596	20.7214	47.7905	52.002	103.18	133.087	173.737	212.708
486.5	0.21362	0.39673	0.18311	0.15259	3.32642	8.17871	10.9558	29.48	52.124	61.8286	89.508	134.064	169.434	219.086
487	0.73242	-0.24414	-0.30518	0.61035	1.95312	8.17871	11.4441	27.9846	46.1731	64.9719	82.7942	127.655	171.265	231.812
487.5	0.64087	1.06812	-0.42725	1.52588	2.47192	7.14111	10.0708	27.2522	37.0483	62.3169	89.447	131.012	177.307	238.312
488	1.37329	1.0376	0.12207	1.40381	2.01416	7.23267	10.3149	24.0784	35.1562	62.2864	103.119	121.887	174.53	236.969
488.5	1.09863	1.46484	-0.09155	0.64087	3.14331	5.70679	9.30786	24.4141	45.227	47.9126	102.844	136.475	183.868	222.961
489	1.2207	0.45776	0.03052	0.94604	3.90625	4.88281	7.9956	19.928	37.8113	63.4155	109.192	146.851	185.486	206.329
489.5	0.94604	0.76294	0.33569	1.0376	2.92969	5.12695	8.11767	27.4353	37.1704	62.1033	105.56	155.426	173.859	208.801
490	0.94604	1.83105	0.36621	0.39673	4.30298	5.34058	7.90405	29.1443	40.8325	70.0683	104.797	144.104	155.67	202.362
490.5	1.40381	-0.24414	0.12207	-0.12207	3.57056	6.98852	8.36182	23.6816	33.6304	69.7632	114.594	139.099	157.562	203.766
491	0.94604	0.91553	0.42725	1.0376	3.69263	5.46265	14.0686	25.5432	36.438	59.1431	104.156	138.977	156.799	219.299
491.5	0.67139	0.33569	-1.5564	0.30518	3.2959	5.0354	20.5078	19.8669	35.4004	58.9905	98.3887	126.617	177.643	221.68
492	0.33569	0.64087	-0.7019	0.57983	5.52368	8.11767	11.261	26.9775	30.7922	53.7109	84.4421	126.221	185.974	217.041
492.5	0.82397	0.18311	-0.54932	-0.21362	3.54004	4.5166	12.085	32.898	32.5928	58.1665	89.4775	128.113	166.901	213.776
493	-0.06104	-0.03052	-0.85449	0.18311	1.64795	6.43921	10.9253	26.0315	34.729	65.8874	91.6138	120.819	159.485	201.355
493.5	0	-0.12207	0.06104	0.45776	2.19727	5.7373	10.9863	24.7803	30.5481	69.519	90.8203	135.162	156.738	198.914
494	0.82397	-0.45776	-0.5188	0.94604	3.93677	5.18799	13.4277	22.4915	33.1421	63.2324	87.1277	134.521	161.102	218.536
494.5	-0.45776	-0.09155	-0.39673	-0.54932	6.50024	4.88281	8.75854	20.1111	27.1606	66.5283	104.492	134.216	153.473	216.949
495	0.27466	-0.03052	0.12207	-0.48828	7.59888	4.73022	11.9934	17.8833	30.9143	67.9321	102.57	132.141	171.509	234.192
495.5	1.25122	0	-0.09155	-0.45776	6.95801	3.87573	12.5427	18.9514	31.6467	70.9839	92.3462	113.953	180.084	253.723
496	0.57983	0.48828	-1.00708	0.42725	4.94385	4.24194	10.7422	22.644	31.7078	73.2117	93.2007	137.268	178.65	228.149
496.5	0.73242	-0.39673	-0.18311	0.82397	4.91333	4.69971	20.1416	22.1863	31.9824	62.7136	98.8159	121.643	171.844	209.381
497	0.06104	-0.39673	-0.18311	1.06812	1.86157	4.91333	17.5781	20.8435	24.7803	57.4646	90.3931	126.617	171.478	215.24
497.5	0.18311	0	-0.79346	0.61035	2.16675	4.48608	19.3787	22.3389	30.6396	54.9622	100.616	141.998	153.015	208.893
498	0.85449	0.39673	-0.7019	0.33569	1.92261	8.78906	21.9116	22.3694	31.5857	55.6335	109.589	152.557	148.254	221.558
498.5	0.79346	0.36621	-1.00708	1.58691	1.58691	5.70679	24.2615	23.5291	32.8674	66.5283	107.544	142.364	176.208	240.631
499	0.15259	0.79346	-1.0376	0.03052	3.84521	7.2937	18.5242	24.292	31.0974	76.7822	100.464	133.423	185.028	245.27
499.5	0.97656	0.09155	-0.45776	2.34985	2.38037	7.87353	17.2119	19.5312	36.9568	66.864	99.4263	128.082	170.837	249.756
500	0.54932	0.94604	0	1.25122	1.58691	8.27026	16.2659	22.7966	38.6658	64.8193	92.3767	130.615	179.565	225.616
500.5	0.39673	0.54932	-0.33569	0.85449	2.28882	5.37109	11.2305	22.7051	33.783	69.397	86.1816	142.334	148.315	209.595
501	0.7019	0.94604	-0.57983	2.04468	3.2959	4.97436	12.8174	17.5781	38.4827	74.707	100.952	136.353	167.572	224.182
501.5	1.58691	1.09863	0.15259	2.89917	3.54004	4.76074	11.8103	18.6768	38.2996	64.7583	107.849	147.217	161.743	246.277
502	1.52588	0.24414	-0.97656	0.45776	3.60107	4.88281	12.207	20.2942	31.1584	67.9932	111.664	150.665	180.572	257.141
502.5	0.82397	0.91553	-0.57983	2.50244	4.05884	5.21851	9.0332	23.0713	37.4145	58.4106	110.809	140.655	175.964	244.476
503	0.36621	0.97656	-1.34277	0.76294	4.18091	5.24902	11.0474	23.3154	32.5928	69.7021	97.4121	119.171	167.389	239.136
503.5	1.25122	1.06812	-0.42725	-0.18311	2.99072	5.31006	12.3901	25.6348	26.9165	66.1011	105.438	114.624	152.832	232.727
504	1.15967	2.53296	0.15259	2.22778	5.09644	5.64575	15.686	24.3835	26.6724	64.4836	107.697	137.36	159.424	244.873
504.5	2.38037	1.92261	0.12207	1.61743	4.45557	5.21851	17.4561	20.9656	31.4026	63.4766	110.474	138.977	165.527	232.361
505	1.70898	1.00708	-0.76294	0.61035	4.42505	5.00488	10.9253	19.7754	36.2244	65.5212	90.9729	146.057	175.72	229.706
505.5	2.19727	1.61743	0.27466	0.42725	4.54712	5.27954	10.0403	17.8833	39.6118	66.8945	80.719	135.803	160.4	220.856
506	1.77002	0.79346	-0.45776	0.76294	5.37109	6.10352	12.9395	24.1089	36.1633	65.4602	93.1702	143.463	164.062	233.032
506.5	1.2207	0.82397	-0.33569	1.31226	5.37109	6.073	13.031	27.2217	45.7764	62.6221	87.4939	145.294	177.155	234.131
507	1.19019	1.06812	0.18311	1.15967	5.64575	6.56128	13.6414	25.9094	37.6892	71.5027	96.5881	135.681	167.206	222.626
507.5	1.2207	-0.21362	0	1.34277	4.60815	8.02612	11.7493	25.7263	39.2151	56.6406	103.485	148.895	176.208	248.016
508	1.46484	0.09155	-0.61035	2.2583	2.68555	7.32422	11.5967	22.7051	42.45	59.967	79.9866	142.395	173.523	258.026
508.5	1.28174	0.27466	-0.7019	2.99072	1.70898	4.88281	13.2446	20.9045	37.1399	54.9622	82.3059	136.383	175.781	254.639
509	0.30518	-0.39673	-1.31226	2.65503	1.70898	5.27954	17.273	21.1182	37.3535	53.894	94.1772	140.961	185.791	275.207
509.5	0.5188	-0.5188	-1.19019	1.52588	2.99072	5.52368	16.7236	25.116	37.9333	56.5491	103.394	153.717	186.584	258.789
510	-0.12207	-0.15259	-0.82397	1.25122	1.52588	6.40869	14.7095	28.717	42.2974	68.0237	97.168	157.471	186.005	241.974
510.5	-0.09155	1.0376	-0.7019	1.31226	2.83813	6.46973	15.2283	25.7263	38.5437	67.5354	82.8857	146.606	180.695	246.796
511	0.61035	-0.30518	-1.49536	1.80054	2.74658	5.21851	14.5569	25.5127	32.1655	54.3518	73.9136	138.824	185.791	260.925
511.5	0.7019	0.36621	0.03052	-0.12207	2.80762	5.24902	11.7493	24.4141	33.2947	63.5376	86.0596	134.949	174.957	238.403
512	1.43433	-0.09155	-1.12915	1.00708	3.11279	4.08935	16.1743	24.6887	36.6821	59.0515	96.7712	153.748	190.094	239.136
512.5	0.39673	-0.36621	-0.27466	0	2.86865	7.8125	12.8174	19.8364	43.7012	58.136	97.168	152.283	195.374	230.469
513	1.09863	0.09155	-0.09155	-0.09155	2.86865	9.67407	11.5967	22.1863	45.3491	64.0564	95.6726	135.895	194.244	246.765
513.5	1.12915	0.21362	0	0.7019	1.12915	7.59888	12.6648	23.8342	37.5977	72.937	98.2971	138.275	187.073	240.997
514	0.27466	0.27466	-1.09863	2.10571	1.64795	6.7749	12.8479	21.1487	33.7524	59.3567	88.8367	142.548	193.573	234.009
514.5	0.36621	-0.67139	-0.21362	0.73242	2.74658	5.7373	16.0522	20.3857	41.748	53.833	84.2895	141.541	195.801	227.936
515	0.36621	-0.73242	-0.85449	1.70898	3.26538	6.13403	15.564	26.123	40.2222	54.3213	98.053	147.736	192.932	236.481
515.5	0.30518	0.06104	-0.61035	0.21362	1.52588	5.34058	16.6321	24.7803	44.0369	60.5164	86.2121	141.327	180.481	254.395
516	1.31226	0.03052	-0.06104	0.24414	0.79346	8.54492	23.0408	21.7895	33.6609	67.0776	85.9985	141.785	194.641	237.549
516.5	0.73242	-0.15259	0.06104	1.0376	2.31934	9.88769	17.0898	24.4751	30.365	53.8635	107.941	141.541	200.439	241.333
517	0.94604	-0.21362	-0.12207	1.98364	1.25122	8.08716	14.1296	20.2331	31.3416	55.4809	107.3	140.686	210.144	245.117
517.5	0.27466	-0.27466	0.27466	0.94604	2.89917	5.82886	15.8386	32.6843	30.9753	57.0984	103.119	156.036	213.135	239.807
518	1.40381	0.15259	-0.12207	0.18311	3.17383	5.67627	14.0076	30.9448	36.4685	56.8542	90.3625	131.012	217.346	225.769
518.5	0.24414	0.82397	-0.82397	0.45776	3.08228	5.15747	18.0359	32.3486	34.4543	49.2554	80.0171	147.186	204.62	218.323
519	1.89209	0.64087	-0.5188	0.36621	6.80542	4.91333	19.043	31.8604	28.4119	45.4102	84.7168	166.29	195.343	224.091
519.5	0.45776	0.42725	0.39673	0.79346	5.06592	7.75146	18.5547	27.8931	40.8325	59.2651	84.5032	159.149	200.348	233.795
520	0.85449	0.61035	0.36621	0.42725	6.28662	6.68335	12.3901	30.2429	35.9802	70.5566	83.374	146.912	196.503	215.454
520.5	1.40381	0	-0.21362	2.50244	7.65991	6.83594	14.9841	29.4189	37.1094	56.9458	84.0149	137.726	170.807	242.218
521	1.15967	1.34277	0.76294	1.31226	5.06592	7.35474	13.031	17.9748	32.959	49.8352	86.6394	151.245	174.469	216.583
521.5	1.09863	1.0376	0.30518	0.18311	3.93677	7.93457	12.207	23.1628	40.9851	47.2717	92.2546	162.292	181.396	203.644
522	1.09863	0.61035	-0.36621	2.04468	2.28882	7.26318	13.916	26.3061	46.9665	45.227	91.4917	174.194	186.707	199.921
522.5	1.40381	0.76294	-0.30518	2.01416	3.96728	7.08008	13.3667	25.7873	49.5911	52.948	77.5452	153.442	186.859	220.123
523	0.88501	0.54932	0	0.67139	2.92969	7.96509	12.7563	23.8953	46.2646	65.8569	74.707	154.572	160.034	235.748
523.5	0.64087	0.45776	0.5188	0	2.34985	7.59888	14.801	25.238	51.8494	71.9604	86.731	167.999	173.981	208.71
524	0.94604	1.31226	-0.12207	-0.09155	1.7395	8.3313	21.3623	18.0359	36.8957	68.3594	91.5832	168.396	186.981	201.935
524.5	0.36621	1.31226	-0.61035	0.45776	3.69263	5.21851	12.8784	22.6746	32.9895	65.979	94.6045	173.889	210.358	217.194
525	0.57983	0.39673	-0.88501	-0.03052	3.14331	10.5286	13.3972	21.0571	33.9355	64.8804	88.0127	160.4	207.825	207.428
525.5	1.00708	-0.30518	-1.06812	-0.21362	4.63867	9.27734	15.1062	21.3013	33.9966	66.7419	86.7615	130.463	210.937	204.803
526	0.30518	-0.48828	-1.12915	-0.73242	3.14331	10.1013	13.6108	24.3835	32.959	67.5659	95.2148	138.428	208.71	208.679
526.5	0.24414	0	-0.79346	0.27466	2.04468	8.20923	15.3503	27.9541	29.1443	65.7959	86.792	138.611	215.912	230.194
527	0.61035	0.42725	-1.52588	-0.57983	3.08228	10.7422	19.928	23.8037	33.1421	68.9697	81.8786	146.576	206.97	234.222
527.5	1.06812	0.18311	-1.5564	0.36621	2.19727	7.62939	18.1885	25.4211	44.4946	81.604	87.0972	159.393	193.146	225.098
528	0.79346	-0.27466	-1.2207	-0.21362	2.71606	6.68335	17.6697	25.2686	44.1589	75.4394	83.8623	142.303	197.327	230.865
528.5	1.00708	0.30518	-0.7019	-1.31226	1.5564	9.0332	16.4795	28.1677	42.3584	75.9277	74.646	168.579	197.906	212.616
529	1.2207	0.39673	-1.49536	0.79346	4.48608	8.36182	18.0664	22.3694	41.2598	74.2187	94.1162	140.35	193.176	224.365
529.5	0	0.18311	0.06104	-0.61035	1.40381	9.58252	18.0664	24.5666	41.4734	74.646	91.7664	142.395	195.374	217.895
530	0.97656	0.73242	-1.00708	1.86157	2.38037	8.54492	18.7073	21.2402	40.2527	69.9158	88.0737	123.383	194.58	219.727
530.5	1.12915	0.54932	-0.97656	1.15967	1.67847	8.20923	19.1956	23.5901	37.8418	69.9158	75.0732	131.317	186.798	217.316
531	-0.15259	-0.03052	-0.27466	0.27466	0.88501	9.39941	19.3176	20.1111	44.342	72.5708	77.1484	154.846	179.504	237.061
531.5	1.19019	1.06812	0.36621	0.79346	1.92261	9.552	11.6882	21.3013	44.1284	77.2705	80.3223	171.387	181.671	212.372
532	0.79346	0.57983	0.48828	0.45776	2.31934	6.65283	11.5356	19.6533	48.3093	65.5517	90.0574	182.434	179.26	220.093
532.5	0.57983	1.06812	0.45776	1.0376	2.16675	7.08008	13.3057	18.8904	47.0276	71.3501	96.8017	171.234	191.986	218.658
533	0.97656	0.7019	-0.5188	0.09155	2.59399	9.06372	18.8599	20.0195	45.4712	67.3218	87.6465	151.916	188.232	226.318
533.5	1.70898	0.64087	0	0.61035	2.47192	10.1929	17.1814	26.6418	47.6684	62.4695	83.0994	153.29	187.958	212.036
534	0.79346	0.73242	-1.06812	0.15259	3.02124	11.2915	14.5569	30.7312	42.5415	59.1431	81.4514	158.508	179.047	228.088
534.5	0.48828	0.5188	-0.39673	0.94604	1.46484	9.09424	14.1296	26.3977	47.7295	44.6167	85.0525	162.17	194.092	220.917
535	0.36621	0.64087	-0.88501	0.39673	4.11987	9.3689	15.8997	39.978	43.396	53.8025	99.5789	151.978	185.73	218.597
535.5	0.30518	1.70898	-0.03052	-0.42725	3.93677	9.12475	15.4114	32.196	45.2881	56.0608	87.1582	177.063	181.793	207.733
536	0.03052	0.73242	-0.61035	-0.03052	3.57056	8.02612	10.1623	30.304	35.4614	64.6667	103.271	158.813	165.955	220.245
536.5	1.61743	1.49536	-0.42725	0.7019	4.30298	11.8408	12.8479	25.0855	36.0107	67.2302	114.899	171.783	187.195	213.47
537	0.79346	0.33569	-0.24414	0.36621	4.57764	11.0168	11.6577	25.2686	36.7432	66.7419	94.4214	163.513	173.004	220.978
537.5	1.25122	1.43433	-0.45776	1.12915	4.54712	5.79834	12.3901	36.438	35.6445	58.5022	91.9189	158.417	183.868	213.257
538	0.64087	1.25122	-0.30518	0.97656	4.21143	7.9956	16.6321	34.729	46.936	57.373	87.2498	153.015	190.155	212.036
538.5	1.15967	2.01416	-0.21362	1.5564	2.68555	11.8408	11.5051	28.1067	47.1802	69.5801	90.0574	154.51	196.564	214.752
539	1.49536	0.48828	-0.09155	2.7771	4.5166	13.1531	10.498	21.7285	51.5137	69.8242	85.5713	149.2	179.535	201.965
539.5	0.85449	0.82397	-0.06104	1.52588	3.32642	14.2822	15.2283	20.5994	47.76	55.1453	84.9609	152.863	178.741	223.236
540	1.06812	0.76294	0.33569	0.82397	2.41089	12.3596	12.8174	24.8108	38.7573	56.2134	81.7261	129.242	181.061	213.562
540.5	0.42725	1.09863	0	0.24414	1.40381	10.1623	10.1013	23.4375	39.4592	60.4248	71.9604	116.18	186.462	218.75
541	-0.15259	0.61035	-1.34277	0.76294	3.50952	11.261	9.88769	24.2615	38.0249	59.3872	74.4324	132.538	155.273	234.222
541.5	0.61035	0.03052	-1.5564	0	1.67847	12.3596	11.2305	28.5034	38.6963	53.7415	94.2383	137.787	158.875	228.363
542	0.7019	0.42725	-1.00708	-0.85449	1.77002	10.3149	13.031	32.6233	38.9709	56.9458	84.1675	145.935	162.659	230.835
542.5	1.0376	-0.27466	-0.67139	0.42725	3.08228	12.3901	15.7165	32.7759	36.4685	54.2908	74.3103	150.879	171.936	228.394
543	1.00708	0.03052	-1.77002	0	2.74658	12.5427	16.1743	29.3884	34.1797	52.3682	74.707	131.531	194.824	222.443
543.5	0.21362	0.27466	-1.43433	-0.76294	1.34277	10.4065	17.1814	38.9709	40.9851	54.9011	79.01	124.329	165.131	231.445
544	0.54932	0.18311	-1.40381	-1.15967	1.2207	7.47681	15.8691	38.0859	33.8745	51.7578	61.4014	134.583	164.886	217.377
544.5	0.09155	0.45776	-1.25122	-1.00708	1.70898	5.43213	12.6648	36.1023	36.5295	43.2129	60.2417	132.08	165.466	206.36
545	0	-0.18311	-1.46484	-0.33569	2.80762	6.5918	10.4675	29.9377	32.8369	58.197	60.0281	148.285	163.086	207.947
545.5	1.0376	0.61035	-1.83105	-0.09155	1.92261	8.8501	14.8621	33.6304	30.8227	59.4177	72.1741	150.879	179.169	198.334
546	1.49536	0.76294	-1.2207	0.03052	1.80054	10.8337	15.6555	32.5622	31.6162	60.0586	69.8547	128.845	191.223	206.573
546.5	1.43433	0.5188	-1.40381	0	2.2583	9.49097	17.4866	31.25	34.3017	54.6265	69.3359	134.796	187.103	208.74
547	1.00708	0.21362	-0.64087	0.09155	1.80054	10.4065	16.7847	34.729	40.1306	49.7437	79.6814	130.157	184.845	224.396
547.5	0.61035	1.40381	-1.19019	0.82397	3.60107	7.93457	19.4397	32.4707	45.4102	49.5605	90.9424	132.355	192.139	212.28
548	0.21362	0.15259	-0.57983	0.15259	2.74658	6.16455	17.8223	32.2266	46.1731	59.021	94.5435	143.89	195.465	219.177
548.5	0.36621	0.82397	-1.09863	-0.18311	1.19019	6.95801	14.1907	38.269	33.9355	58.197	96.8017	138.031	181.549	228.79
549	0.54932	1.00708	-0.24414	-0.57983	1.28174	5.70679	13.0005	36.7126	34.0271	52.887	105.255	129.12	175.415	206.573
549.5	0.5188	0.24414	-0.76294	-0.09155	1.95312	7.01904	10.1623	36.0107	32.2266	60.3027	89.4165	132.965	173.523	204.864
550	-0.18311	0.21362	-0.48828	0.54932	3.17383	11.5356	9.64355	32.8674	29.6936	65.6738	86.5173	140.137	168.06	228.912
550.5	1.49536	0.03052	-1.12915	-0.33569	1.31226	12.3596	8.42285	32.5317	39.3677	59.967	87.1887	131.134	168.579	235.87
551	0.91553	-0.67139	-0.94604	-0.5188	2.31934	8.39233	8.81958	26.2451	36.7432	55.6946	91.4307	124.542	172.272	239.563
551.5	1.15967	0.09155	-0.97656	-0.09155	3.35693	9.00268	8.23975	29.5105	29.9377	59.1125	91.1865	132.843	170.135	218.658
552	0.79346	0.5188	-0.18311	1.31226	2.92969	8.57544	10.6201	27.0081	30.9448	51.2695	92.4072	123.077	167.755	222.748
552.5	0.39673	-0.03052	-1.00708	0.24414	2.31934	6.34766	14.2517	20.6604	37.0789	55.0232	80.3528	117.401	175.446	215.576
553	1.25122	-0.33569	-1.00708	-0.39673	3.60107	6.43921	11.6577	19.5618	37.0178	54.0161	80.1086	120.422	150.848	213.379
553.5	1.52588	-0.7019	-0.54932	-0.64087	6.62231	7.56836	13.1836	22.3084	28.3814	49.3469	93.811	124.817	178.101	221.405
554	0.54932	0.79346	-0.15259	0.03052	5.27954	7.41577	16.8762	18.7378	33.7219	44.7082	93.6279	130.341	181.793	233.032
554.5	1.25122	-0.21362	0.36621	-0.45776	4.82178	8.75854	15.4419	16.3879	36.2854	52.5818	90.4846	139.069	165.131	219.757
555	1.70898	0.73242	-0.15259	1.2207	3.72314	6.2561	15.4419	21.9727	52.8259	43.2434	102.081	142.639	165.894	216.339
555.5	1.37329	0.76294	-0.27466	0.30518	4.39453	7.65991	11.4136	21.637	55.3894	45.5627	98.6938	135.437	196.93	197.54
556	0.45776	1.15967	0	0.36621	2.92969	6.62231	9.39941	18.5242	55.0232	48.1567	98.3581	121.613	177.734	221.1
556.5	1.43433	0.64087	-0.06104	0.18311	3.78418	8.60596	9.97925	23.1628	56.7932	55.4199	79.7729	120.453	178.589	221.924
557	0.97656	0.09155	-0.30518	0.06104	2.65503	7.62939	10.2234	16.9983	57.373	56.6711	88.3484	120.239	199.097	221.71
557.5	0.73242	0.24414	0.5188	1.12915	4.82178	7.14111	9.67407	16.9372	54.779	49.3774	83.6792	129.852	175.72	214.111
558	0.30518	0.85449	0.57983	-0.73242	3.9978	5.98144	10.437	17.4561	48.6145	47.8821	83.5266	128.571	176.361	214.569
558.5	0.82397	0.12207	0.76294	0	5.70679	8.45337	15.564	17.8528	47.699	45.99	88.8061	103.18	161.255	227.356
559	-0.48828	-0.21362	-0.21362	1.70898	3.60107	8.57544	9.52148	25.3906	38.3301	39.0015	80.6885	118.958	160.645	251.587
559.5	0.85449	0.39673	-0.64087	1.2207	4.3335	7.50732	12.1765	25.4211	40.8325	49.408	78.0945	135.559	157.288	232.3
560	0.82397	0.39673	0.09155	-0.73242	3.44849	5.76782	11.5967	26.7944	41.4734	50.415	86.9446	141.235	162.079	222.382
560.5	0.24414	-0.67139	-1.15967	0.33569	1.61743	6.62231	11.9934	17.1814	42.572	54.2297	90.2405	140.869	169.159	207.55
561	0.12207	-0.42725	-0.45776	-0.94604	1.83105	5.49316	9.79614	18.2495	35.614	52.6123	92.865	133.972	178.955	207.672
561.5	0.36621	-0.27466	-1.2207	-0.7019	1.89209	6.7749	12.4207	21.9421	44.5862	48.7366	87.0056	130.798	167.358	217.468
562	0.42725	0.36621	-0.57983	-0.18311	4.66919	4.97436	15.1672	19.989	35.1562	50.9644	82.0923	152.832	167.541	205.841
562.5	0.18311	0.85449	0.7019	-0.03052	5.06592	3.93677	17.8528	21.8506	42.1753	50.7507	87.616	153.687	155.548	210.358
563	-0.79346	0	-0.7019	1.06812	7.53784	3.9978	17.0898	26.1536	35.6445	54.9316	81.1462	158.417	144.226	213.623
563.5	0.64087	0.64087	-1.19019	0.91553	4.79126	4.82178	13.7634	22.2778	36.1328	59.1736	73.3642	138.458	158.478	226.807
564	1.70898	0	-0.33569	-0.24414	5.49316	5.52368	13.3972	26.8555	32.6538	56.366	81.7871	149.17	158.112	206.512
564.5	0.7019	0.33569	0.06104	-0.61035	5.24902	4.79126	13.7024	21.6064	38.5437	63.8428	98.175	159.821	163.666	179.169
565	1.0376	-0.18311	-0.73242	0.30518	3.75366	5.49316	13.2141	24.6887	39.154	59.082	126.465	155.701	165.71	224.213
565.5	1.80054	0.5188	0.03052	-0.21362	2.92969	5.27954	10.4675	26.5808	49.0112	54.3823	98.7549	148.804	179.016	210.358
566	1.15967	0.61035	-0.64087	-1.40381	3.41797	5.18799	12.5732	29.7546	51.6052	49.9878	98.3581	132.507	178.741	221.436
566.5	0.33569	0.21362	-0.24414	-0.76294	3.84521	6.31714	11.5662	26.7334	40.4663	49.7437	98.5107	119.873	193.665	232.544
567	-0.06104	0.27466	0.36621	0.12207	3.63159	10.3455	15.3503	30.6091	43.8843	53.4058	92.9565	118.347	204.437	211.456
567.5	0.64087	0.09155	-0.91553	-0.21362	3.20435	10.1318	11.7493	34.9426	38.4521	58.136	100.891	118.378	194.305	197.906
568	0.91553	0.97656	-0.54932	0.18311	2.47192	8.39233	11.1389	27.832	38.5132	43.2129	102.692	135.345	180.847	207.611
568.5	0.30518	0.30518	-0.09155	0.91553	3.72314	7.53784	14.6179	30.1819	34.3323	48.5535	110.718	120.3	190.918	214.996
569	0.45776	1.37329	-0.57983	0.48828	3.84521	7.26318	12.2681	29.0222	27.3743	54.657	115.356	121.735	190.033	230.408
569.5	1.19019	0.82397	0.21362	0.5188	5.5542	6.71387	15.8997	24.1089	21.9421	49.7742	98.3887	120.056	211.243	228.943
570	1.40381	0.88501	0	0.57983	2.89917	6.073	16.2659	25.8789	26.7639	50.3845	98.6328	105.225	221.191	215.393
570.5	1.19019	0.33569	-0.36621	0	5.12695	6.22559	18.7988	19.2871	33.2031	45.7153	106.018	113.525	219.147	222.168
571	2.0752	1.06812	0.54932	0.09155	5.34058	6.22559	14.8315	26.7639	33.905	62.2864	104.34	116.18	207.733	219.086
571.5	1.5564	0.57983	1.12915	0.7019	4.18091	7.26318	15.686	24.9634	41.7175	60.1807	103.577	141.266	218.323	209.473
572	1.12915	0.33569	0.42725	0.54932	7.93457	5.52368	21.5454	26.886	39.6118	61.9507	110.504	140.717	210.999	219.604
572.5	1.28174	0.76294	0.48828	-0.42725	6.073	6.53076	15.3503	26.2451	37.8113	60.9436	98.0225	108.246	197.266	225.403
573	1.95312	0.91553	0.27466	0.42725	3.14331	4.97436	12.2681	22.7966	41.687	61.9202	92.4072	118.317	200.012	232.849
573.5	1.83105	0.64087	0.61035	-0.09155	2.80762	4.60815	11.9324	25.3601	40.1306	64.4836	97.4121	118.134	186.249	219.543
574	1.5564	0.91553	-0.42725	0.12207	3.84521	7.01904	11.9018	26.2756	35.3394	71.7773	103.851	108.246	167.938	216.98
574.5	1.77002	1.0376	1.09863	0	1.58691	5.40161	14.7095	25.7568	38.4216	70.7397	92.1936	138.733	164.886	231.72
575	0.97656	0.42725	-0.15259	2.22778	1.40381	4.69971	13.2141	25.7263	37.7502	71.8994	81.4819	112.732	168.457	228.882
575.5	0.82397	0.12207	-0.61035	2.19727	3.11279	4.85229	14.74	27.1912	31.8298	67.6269	88.8977	122.986	177.948	221.069
576	0.79346	0.21362	-0.85449	0.48828	2.38037	6.31714	11.4441	26.6113	30.6702	67.3828	84.2285	138.458	153.809	236.359
576.5	1.40381	0.39673	-0.7019	1.2207	1.80054	4.94385	11.8713	27.1301	35.0647	64.4531	88.4704	139.343	154.327	223.755
577	0.61035	0.67139	-0.73242	0.27466	2.50244	4.88281	9.61304	29.2664	42.2058	62.0727	97.0459	150.33	157.196	232.025
577.5	0.27466	-0.15259	0.33569	1.0376	2.74658	5.5542	11.1999	32.4097	46.6003	84.1675	106.903	164.886	160.126	241.913
578	0.09155	-0.24414	-0.18311	-0.5188	2.65503	3.84521	8.48389	24.9634	38.9709	67.5964	102.264	152.832	145.874	234.192
578.5	0.48828	0	0.09155	0.82397	2.31934	5.06592	10.6506	23.0713	43.2129	65.979	107.056	146.271	143.616	248.81
579	0.21362	0.39673	0.5188	0.30518	2.04468	6.80542	12.8479	24.9329	39.6423	65.8264	104.797	153.625	168.335	216.309
579.5	0.54932	0.67139	1.49536	0.39673	2.86865	8.05664	14.4348	28.1372	48.2788	66.04	95.459	143.982	172.211	225.25
580	0.61035	0.73242	-1.0376	-0.64087	2.2583	5.82886	12.146	20.4468	44.0369	67.0166	90.7593	121.552	177.521	237.244
580.5	0.73242	0.97656	-0.5188	1.28174	3.57056	4.42505	11.8103	26.4587	42.2668	66.5893	90.3625	146.576	160.309	230.591
581	-0.06104	0.45776	-0.61035	0.91553	3.50952	5.00488	10.2539	24.2004	48.9197	50.7812	88.1653	149.445	159.424	233.063
581.5	-0.12207	0.82397	-0.27466	0.24414	3.78418	5.15747	10.6812	25.4517	44.9219	56.0303	82.0007	124.878	178.986	242.279
582	1.34277	0.42725	-0.33569	0.73242	4.24194	9.79614	11.8713	22.0642	38.2385	58.5632	91.5527	136.597	179.749	231.415
582.5	1.19019	0.03052	-0.5188	1.15967	3.9978	8.63647	14.4959	20.6909	40.3747	69.2139	74.7986	142.761	147.034	234.863
583	0.85449	0.67139	-0.39673	1.43433	4.91333	8.11767	13.1226	19.4702	44.7693	61.4929	83.6792	134.369	155.182	240.692
583.5	0.61035	1.00708	-0.57983	0.88501	5.40161	6.92749	13.6414	20.5383	46.6003	55.4809	83.6182	131.165	164.246	221.191
584	0.54932	0.76294	-0.48828	0.09155	5.18799	7.72095	8.60596	23.4985	43.1824	59.4177	85.3271	137.054	163.3	245.27
584.5	0.73242	0.18311	-0.09155	-0.18311	3.38745	6.7749	8.97217	24.7192	40.5273	57.1899	97.0459	142.67	156.921	226.898
585	1.12915	0.15259	-0.5188	0.03052	2.59399	7.01904	15.1367	25.0244	43.2434	76.4465	96.4661	143.89	152.771	207.397
585.5	0.85449	1.34277	-0.24414	0.27466	3.32642	8.88061	13.3972	26.4282	41.5039	76.7517	99.6399	155.09	160.431	204.163
586	1.34277	0.85449	-1.52588	0.12207	4.76074	9.70459	13.1531	26.2451	41.0461	66.5283	93.0786	145.325	177.795	199.127
586.5	1.25122	-0.03052	-0.30518	0.09155	3.78418	7.65991	11.8408	22.3084	37.5671	71.1365	100.464	145.599	180.206	200.5
587	1.83105	0.48828	-0.24414	0.30518	5.46265	10.5286	15.1367	23.0102	35.8582	67.9626	105.133	147.705	181.488	223.541
587.5	1.80054	1.37329	-0.45776	0.27466	5.76782	11.5662	17.7002	20.874	41.8396	81.2073	89.2639	148.193	198.151	204.926
588	0.30518	0.76294	-0.30518	0.03052	2.31934	12.0544	16.9067	18.1885	29.9377	82.2449	93.7805	156.647	185.211	212.219
588.5	0.88501	1.49536	-0.5188	0	2.0752	13.4888	12.6648	16.571	38.0859	77.9114	89.3555	167.053	174.5	209.29
589	0.64087	0.64087	-0.12207	0.82397	3.9978	11.9018	14.679	18.7073	37.384	79.6204	93.9331	171.57	180.267	234.467
589.5	0.21362	2.56348	-0.30518	0.48828	2.04468	14.1296	13.3972	17.4561	33.5083	62.439	97.1985	158.051	175.873	233.826
590	1.12915	1.28174	0.21362	0.39673	3.93677	12.97	12.6038	20.1111	29.9072	68.573	91.8579	146.576	173.981	217.712
590.5	1.58691	0.54932	1.5564	0	3.23486	11.2915	11.0168	18.4936	37.6282	72.113	81.8786	152.802	197.662	227.356
591	0.45776	1.5564	0.27466	-0.45776	3.75366	8.57544	10.4675	16.0217	36.0107	64.8499	93.6584	155.457	160.126	216.492
591.5	0.91553	0.82397	0.27466	-0.12207	5.49316	9.58252	8.14819	18.0664	32.0129	72.2046	94.3603	143.25	166.962	213.806
592	0.06104	0.88501	-0.5188	-0.42725	5.24902	10.9253	7.69043	22.9187	32.8064	58.3496	102.692	141.785	156.982	228.18
592.5	0.33569	0.15259	-1.15967	0.45776	6.89697	9.49097	11.0779	25.6043	38.7878	68.1152	98.6023	151.642	161.621	220.52
593	0	0.73242	-1.49536	1.09863	4.36401	6.53076	10.7117	29.5715	31.7993	62.5305	91.2781	141.724	173.126	238.8
593.5	0.06104	-0.15259	-0.67139	-0.73242	6.68335	5.7373	11.8408	29.2053	35.3394	62.9883	88.1958	155.121	184.875	210.419
594	0.45776	-0.24414	-1.37329	-0.48828	7.2937	6.71387	8.11767	28.3203	38.6047	69.9768	74.0356	142.914	171.051	202.789
594.5	-0.18311	-0.57983	-1.00708	-1.40381	3.66211	8.8501	8.17871	25.4822	42.0532	66.3452	76.9348	134.094	171.387	220.367
595	0.39673	0.36621	-0.61035	-0.24414	3.38745	6.22559	7.59888	25.1465	50.3235	66.9861	87.5549	125.61	173.859	219.208
595.5	0.33569	1.31226	-0.18311	0.06104	2.04468	4.60815	7.69043	26.9165	39.7034	64.4836	79.834	116.791	194	229.889
596	0.03052	0.15259	-0.15259	-0.12207	1.64795	4.88281	11.261	29.1443	36.7126	50.293	85.9375	121.49	206.94	215.515
596.5	0.39673	0.54932	-0.24414	-0.15259	1.61743	4.82178	9.00268	33.1116	46.2952	54.2908	85.2966	141.266	211.914	221.741
597	-0.39673	0.36621	-0.94604	-0.36621	1.40381	9.27734	9.3689	27.5879	48.5535	59.3872	88.9587	139.282	213.867	218.292
597.5	0.91553	-0.27466	-1.2207	-0.12207	2.62451	6.80542	8.57544	28.8696	49.1943	72.1436	81.7566	136.2	204.987	233.368
598	1.2207	0.09155	-0.91553	0.12207	2.92969	6.22559	8.66699	26.4282	53.772	78.6438	88.9892	125.58	192.322	247.101
598.5	0.45776	0.21362	-0.42725	-0.03052	4.45557	6.40869	7.35474	22.8577	57.2205	62.7136	94.4824	153.9	191.559	245.209
599	0.97656	1.25122	-1.67847	-0.39673	3.05176	5.15747	7.41577	22.0337	55.9387	49.9878	103.271	151.55	161.652	253.876
599.5	0.64087	0.42725	-1.2207	0	3.66211	4.76074	9.27734	25.0244	48.0042	49.3164	114.41	149.017	178.07	230.652
600	0.15259	0.57983	-1.00708	0.30518	3.05176	5.00488	10.2234	26.062	41.5344	63.2934	114.258	139.893	183.838	236.481
600.5	0.94604	0.5188	-0.97656	-0.03052	2.9602	5.95093	8.78906	26.3061	53.833	56.1218	109.375	137.909	196.503	242.859
601	0.36621	0.5188	-0.79346	0.45776	2.2583	7.8125	10.8337	15.4419	44.9219	79.6509	105.286	150.726	209.32	241.394
601.5	0.27466	-0.06104	-1.31226	1.25122	2.53296	8.39233	8.23975	20.1721	45.5322	73.1201	102.448	133.697	201.569	244.446
602	0.42725	0.39673	-1.25122	0.24414	3.57056	8.54492	9.73511	15.9302	41.687	73.0286	102.112	146.362	183.533	227.814
602.5	0.7019	0.79346	0.12207	0.82397	2.19727	5.79834	7.65991	22.0642	47.2717	65.0635	112.305	155.884	197.784	231.964
603	0.42725	1.49536	0.03052	0.24414	2.44141	5.34058	8.05664	29.3274	47.2107	63.385	94.9402	128.387	186.493	243.103
603.5	0.94604	1.19019	-1.00708	0.79346	2.41089	5.58472	7.96509	28.1677	46.875	63.2019	89.7522	143.829	169.922	228.668
604	0.91553	0.76294	0.30518	0.18311	2.83813	6.71387	8.57544	27.9541	48.0042	59.5398	96.5576	146.79	183.228	241.394
604.5	1.83105	0.94604	0	0.33569	2.9602	7.90405	10.6201	27.1912	41.2598	74.5239	99.2432	153.9	191.284	237.244
605	1.98364	0.88501	0.39673	1.52588	3.72314	7.72095	10.8643	27.9541	53.2837	67.3523	104.858	160.767	179.291	229.156
605.5	0.73242	1.31226	0.06104	2.47192	3.72314	7.78198	10.8948	33.4778	51.7883	63.9038	116.058	141.998	168.427	235.046
606	0.94604	1.25122	0.09155	2.9602	1.80054	7.14111	12.3901	38.7573	50.5981	59.4177	118.225	123.016	159.241	207.886
606.5	0.45776	1.43433	0.33569	1.49536	1.89209	7.84302	10.8032	36.3159	44.6167	65.4297	113.861	130.707	187.439	226.318
607	0.67139	0.15259	-0.54932	0.94604	1.95312	12.3901	11.0168	34.2712	36.9263	66.04	101.99	135.895	187.592	226.654
607.5	0.15259	0.5188	-0.45776	0.91553	1.40381	11.4441	9.24683	31.4331	36.7737	54.0771	99.7009	155.212	198.975	205.841
608	0.57983	0.54932	-0.64087	0.33569	1.64795	8.42285	14.1907	33.3557	30.8533	54.7485	101.379	146.423	200.623	210.449
608.5	0.09155	0.7019	-1.00708	-0.27466	2.65503	9.64355	15.2283	28.1982	33.8745	64.0259	106.262	150.024	193.024	225.098
609	0.73242	0.48828	-0.15259	-0.64087	3.02124	7.20215	13.9465	22.7051	35.4309	57.1899	92.6819	148.651	171.509	241.028
609.5	0.18311	0.42725	-0.82397	-0.09155	4.5166	6.86645	8.57544	22.7661	40.1917	55.8777	83.9233	142.273	167.175	233.459
610	0.06104	1.19019	-0.73242	-0.64087	4.91333	7.47681	8.3313	25.5127	44.281	55.7861	79.7119	155.853	176.758	228.241
610.5	0	0.24414	-1.06812	0.7019	4.60815	8.78906	10.8337	18.1274	35.1868	70.0989	95.4285	145.05	174.255	225.037
611	-0.27466	0	-1.06812	-0.5188	5.64575	6.98852	9.85718	24.353	37.8418	60.6384	100.464	150.33	169.22	240.021
611.5	0.27466	0	-0.30518	1.34277	6.80542	8.30078	10.0098	23.9868	45.105	60.5469	107.819	157.227	166.87	234.436
612	0.24414	0.36621	-0.24414	-0.21362	5.5542	11.261	9.15527	19.989	41.0767	61.8591	90.8203	132.751	178.223	241.394
612.5	-0.03052	1.64795	-0.54932	-0.64087	3.57056	10.5286	7.62939	21.4844	35.4919	69.1223	88.9587	140.045	196.96	237.823
613	0	0.54932	0	0	1.80054	8.60596	7.35474	25.238	41.0767	69.8547	93.1091	125.763	195.74	239.136
613.5	0.18311	0.30518	-0.85449	0.85449	1.92261	8.39233	7.87353	28.1677	39.6423	66.5588	76.2939	125.671	198.853	232.391
614	-0.5188	0.67139	0.48828	0.73242	1.58691	11.4136	7.62939	30.1819	36.8652	61.3403	71.3196	134.705	194.58	236.45
614.5	-0.21362	0.76294	0.45776	0.42725	2.59399	9.61304	7.69043	32.3792	34.3933	63.6902	84.198	133.728	184.509	237.335
615	-0.64087	0.48828	0.48828	0.5188	2.74658	8.17871	8.88061	37.2009	40.0391	70.5566	79.3152	124.817	192.047	237.488
615.5	0.03052	0.45776	-0.7019	-0.15259	1.83105	9.09424	10.498	30.1209	49.9878	66.2842	81.543	131.103	152.802	226.318
616	0.15259	0.5188	-1.34277	0	3.50952	8.23975	9.91821	31.1279	46.6614	70.7092	88.6841	132.202	161.621	226.746
616.5	0.24414	0.88501	-0.67139	-0.82397	3.84521	9.61304	10.1318	33.4778	34.5764	74.9206	85.1135	132.538	172.241	235.748
617	1.34277	0.33569	0.39673	-0.97656	2.01416	13.3057	12.1155	46.2646	34.6985	65.0635	76.1719	134.552	175.446	238.068
617.5	0.24414	0.06104	-0.7019	0.36621	2.01416	11.1694	9.30786	40.8325	29.6326	65.5212	81.1767	121.246	180.359	239.044
618	0.18311	1.15967	-0.09155	0.42725	2.44141	10.2844	12.0239	34.2102	31.8604	56.5796	90.21	128.296	178.528	234.833
618.5	0.64087	0.64087	0.91553	1.34277	3.2959	4.88281	14.679	30.304	36.6821	66.1011	93.1396	137.726	163.91	246.552
619	1.0376	0.88501	-0.03052	-0.21362	1.37329	5.18799	14.1296	28.1372	43.396	59.082	79.1931	138.062	208.343	219.788
619.5	-0.09155	-18.0664	-36.7737	-56.2134	-74.4629	-92.6514	-106.75	-119.781	-133.087	-145.264	-155.182	-150.696	-148.926	-147.919
620	0.33569	-3.69263	-9.21631	-15.564	-19.6838	-24.9023	-27.2217	-29.6326	-32.2266	-35.3088	-36.8957	-32.8064	-30.9448	-31.6467
620.5	0.94604	-2.44141	-6.74438	-11.6882	-13.8245	-17.5781	-21.5759	-22.644	-23.4985	-25.4822	-25.9094	-24.9939	-22.4915	-22.7966
621	0.57983	-1.61743	-5.40161	-9.33838	-11.4441	-15.7776	-17.273	-18.7378	-19.4702	-19.8975	-21.8201	-21.0876	-19.5312	-21.0266
621.5	1.15967	-1.19019	-5.31006	-8.39233	-10.0403	-13.5498	-15.5029	-16.571	-17.1509	-18.219	-19.7754	-18.7988	-17.4561	-18.3105
622	0.54932	-1.37329	-4.63867	-7.72095	-8.14819	-13.3362	-14.1602	-14.7705	-15.8691	-16.51	-17.8833	-18.8599	-15.686	-16.2354
622.5	0.79346	-1.70898	-5.0354	-6.92749	-8.02612	-11.5662	-12.3596	-12.8479	-14.4653	-16.6016	-17.3645	-15.1672	-15.0757	-15.564
623	0.48828	-0.18311	-3.38745	-6.62231	-7.50732	-11.2305	-10.1929	-13.1531	-13.3972	-14.7705	-15.7471	-15.2283	-12.8174	-14.3127
623.5	1.0376	-0.48828	-3.26538	-6.83594	-7.2937	-8.5144	-10.5896	-11.4136	-13.0005	-13.916	-14.7705	-14.74	-13.1531	-14.9841
624	1.28174	-1.25122	-4.02832	-5.7373	-6.50024	-9.58252	-9.97925	-10.8948	-12.3596	-13.031	-13.2752	-13.1531	-12.4817	-13.4888
624.5	0.36621	-0.88501	-3.479	-5.70679	-6.95801	-7.72095	-9.52148	-10.4065	-12.9395	-13.2446	-13.5803	-12.5122	-12.9089	-13.6108
625	0.21362	-0.42725	-3.08228	-6.2561	-6.40869	-7.44629	-9.00268	-11.6882	-10.5591	-12.7563	-12.7258	-14.801	-12.6343	-13.4888
625.5	0.24414	-0.27466	-2.28882	-5.64575	-6.22559	-7.23267	-8.14819	-10.8032	-10.7117	-12.4512	-12.5427	-12.3901	-12.2986	-11.4746
626	0.85449	-0.30518	-3.35693	-5.92041	-5.82886	-7.35474	-9.27734	-11.322	-10.3149	-11.9934	-11.8103	-12.1765	-11.4136	-12.085
626.5	0.33569	-0.61035	-1.92261	-5.0354	-5.88989	-7.9956	-9.09424	-10.7422	-9.49097	-10.7727	-11.5051	-11.1084	-12.6343	-12.8784
627	-0.15259	-0.30518	-3.08228	-4.97436	-6.53076	-7.01904	-7.87353	-9.97925	-10.5286	-11.3831	-11.4441	-11.1694	-11.3831	-11.6882
627.5	-0.73242	-0.79346	-3.08228	-4.42505	-6.62231	-7.2937	-7.96509	-10.376	-9.30786	-11.1389	-11.5356	-11.0779	-11.4746	-11.7798
628	-0.33569	-1.2207	-3.08228	-4.97436	-4.91333	-6.28662	-7.87353	-9.18579	-8.75854	-10.1013	-10.6812	-10.8337	-9.88769	-11.7188
628.5	0.24414	-0.82397	-2.92969	-3.93677	-5.58472	-6.43921	-6.62231	-9.18579	-9.67407	-9.64355	-10.1929	-10.4065	-9.73511	-11.1084
629	0.12207	-0.85449	-1.86157	-4.30298	-6.04248	-6.46973	-7.41577	-9.12475	-9.0332	-9.552	-9.0332	-10.7117	-9.73511	-9.552
629.5	-0.18311	-0.48828	-2.01416	-3.8147	-4.88281	-5.82886	-7.65991	-7.90405	-9.0332	-10.437	-9.67407	-9.49097	-9.79614	-9.46045
630	-0.48828	-0.06104	-2.13623	-3.96728	-4.88281	-6.46973	-7.62939	-8.48389	-9.30786	-9.00268	-10.498	-9.94873	-10.0708	-9.64355
630.5	0.27466	-1.00708	-2.04468	-3.20435	-4.15039	-6.40869	-7.23267	-7.38525	-8.63647	-9.79614	-8.81958	-8.72803	-9.33838	-8.54492
631	0.82397	-0.54932	-2.34985	-4.05884	-4.18091	-4.88281	-6.10352	-7.72095	-7.01904	-10.2234	-9.39941	-8.39233	-9.85718	-9.18579
631.5	1.40381	-1.19019	-1.7395	-3.69263	-4.45557	-5.95093	-6.2561	-8.94165	-7.90405	-9.06372	-9.88769	-8.69751	-8.66699	-9.39941
632	0.67139	-0.5188	-1.83105	-3.75366	-3.90625	-5.37109	-6.53076	-8.81958	-7.17163	-8.88061	-9.21631	-8.63647	-7.9956	-8.88061
632.5	-0.12207	-1.00708	-1.58691	-4.11987	-4.3335	-5.98144	-6.53076	-8.02612	-7.04956	-8.5144	-8.81958	-8.66699	-8.8501	-8.27026
633	0.57983	-0.24414	-1.77002	-3.35693	-3.93677	-5.76782	-7.08008	-7.93457	-8.05664	-8.72803	-8.02612	-8.8501	-7.35474	-9.06372
633.5	0.54932	-0.57983	-0.91553	-3.17383	-3.60107	-5.31006	-6.80542	-8.02612	-7.75146	-8.8501	-8.94165	-8.57544	-8.08716	-9.39941

## Sheet: slo-2(gf) trace
step volt	-60	-50	-40	-30	-20	-10	0	10	20	30	40	50	60	70
time(ms)
0.5	-2.78586	-4.67795	-3.88449	-7.05831	-8.40109	-6.75314	-4.43381	-5.89865	-6.32589	-3.64035	-4.00656	-2.66379	-0.03927	-2.48068
1	-4.91996	-4.91996	-3.82133	-6.62894	-7.54447	-5.71341	-1.62406	-7.4224	-5.89652	-2.84476	-3.21098	-3.63822	-1.13578	-1.80717
1.5	-3.51402	-4.79576	-3.26988	-5.77232	-9.19029	-9.92271	-1.74401	-7.1151	-4.73473	-3.51402	-4.73473	-3.88024	0.08705	-0.64537
2	-4.5495	-4.79364	-4.06121	-5.40398	-7.29607	-10.8971	-1.80291	-9.18816	-3.5119	-3.5119	-4.5495	-2.35223	-1.61981	-3.20672
2.5	-3.44874	-5.15772	-3.32667	-6.98877	-9.43018	-9.00293	-5.34082	-11.6885	-2.28907	-1.98389	-5.52393	-5.09668	-0.82422	-2.10596
3	-3.56868	-3.20247	-4.60628	-7.23079	-8.08528	-9.48909	-4.85042	-13.9446	-4.42317	-4.24007	-4.54524	-3.56868	0.64275	-1.55452
3.5	-2.04067	-1.67446	-4.42105	-7.71694	-8.5104	-7.28969	-3.38345	-11.5622	-3.26138	-2.28481	-4.42105	-3.26138	-0.75894	-0.39273
4	-5.57858	-0.93991	-1.67234	-6.49411	-8.50827	-4.78513	-3.25925	-9.97311	-3.07615	-1.85544	-4.29685	-3.99167	-0.14646	-0.45163
4.5	-3.37919	-1.91435	-2.28056	-7.89579	-8.44511	-7.28544	-1.97539	-10.6424	-3.74541	-3.62333	-3.80644	-2.76884	-0.02226	-2.58574
5	-2.33947	-1.36291	-1.72912	-6.48986	-5.87951	-5.51329	-1.05773	-10.152	-5.94054	-5.33019	-4.17052	-1.85119	-0.81359	-0.69152
5.5	-2.15424	-3.98529	-3.37494	-6.85394	-6.18255	-7.8305	-1.84906	-8.31878	-4.83978	-2.82562	-4.83978	0.10406	-0.01801	-1.54389
6	-1.7859	-2.21315	-3.25074	-5.14283	-4.10524	-6.85181	-0.68727	-3.8611	-4.34938	-2.51832	-2.70143	1.75414	-3.18971	-0.62623
6.5	0.10832	-4.9576	-1.78377	-6.36141	-4.46932	-6.30037	-2.08895	-5.01863	-4.40829	-2.14998	-4.9576	1.8173	-1.6617	1.14591
7	-1.78165	-3.91788	-2.69717	-7.03067	-5.871	-7.0917	-1.41544	-4.8334	-5.13858	-3.06339	-3.91788	1.88046	-1.84268	0.59872
7.5	-1.77952	-3.3054	-2.38987	-5.13645	-6.7844	-8.37131	-2.32884	-5.5637	-5.07541	-3.06126	-3.06126	1.15017	-4.03782	-0.19261
8	-1.77739	-2.87603	-2.57085	-4.15776	-6.59917	-7.33159	-2.50982	-6.84331	-3.1812	-2.50982	-4.03569	1.45747	-1.65532	0.2978
8.5	-0.49353	-3.30115	-2.81286	-3.60632	-8.18395	-9.09948	-2.8739	-7.20739	-4.39978	-2.8739	-4.64392	2.61926	-1.22595	-1.89734
9	-2.93281	-4.39765	-4.88593	-3.48212	-6.0456	-6.53388	-3.42109	-4.64179	-3.48212	-3.11591	-4.51972	2.37725	-1.89521	-2.99384
9.5	-2.62551	-3.41896	-5.61622	-3.23586	-3.90724	-7.32521	-4.27345	-5.79933	-3.54103	-4.27345	-4.27345	1.64696	-3.05275	0.8535
10	-3.3558	-4.69857	-6.6517	-6.40755	-3.96615	-6.8348	-5.85824	-3.23373	-5.36996	-3.05062	-3.05062	0.30631	-2.80648	0.85563
10.5	-2.37711	-4.69645	-7.32096	-8.35855	-3.29264	-6.03922	-5.85611	-2.13297	-3.65885	-2.25504	-1.58365	-0.72916	-2.13297	0.00326
11	-3.04637	-7.01365	-6.34227	-7.99022	-4.38914	-5.97606	-5.30467	-4.81639	-5.1826	-4.57225	-0.91014	-0.78807	-3.59569	0.5547
11.5	-1.45733	-7.25567	-6.03496	-7.62188	-2.06768	-5.36358	-3.47149	-4.02081	-4.20391	-3.71563	-2.18975	-3.28839	-3.16632	0.25165
12	-2.18763	-6.03284	-8.2301	-5.9718	-3.40833	-6.82629	-4.87317	-4.26282	-7.49768	-5.7887	-0.60071	-3.40833	-4.07972	-0.53968
12.5	-1.69722	-5.42036	-6.7021	-6.82417	-5.6645	-7.25141	-5.54243	-4.50484	-7.25141	-5.05415	-1.51411	-1.20894	-4.68794	-0.29341
13	-1.45095	-2.42751	-6.76101	-4.74685	-5.17409	-7.43239	-4.92995	-4.99099	-5.29616	-7.06618	-1.32888	-2.12234	-4.80788	0.44114
13.5	-0.35019	-3.64609	-6.57577	-5.47714	-6.20956	-5.66025	-3.52402	-8.28476	-5.78232	-5.53818	-0.41123	-2.73056	-4.98886	-0.5333
14	0.26229	-3.03361	-3.33879	-5.1088	-4.25431	-4.43742	-5.41398	-6.69572	-5.47501	-3.64396	-0.89738	-1.6298	-4.07121	-1.87394
14.5	-0.59008	-3.27563	-3.3977	-3.09252	-8.40257	-4.86254	-3.27563	-8.46361	-5.77806	-4.55736	-1.74975	-3.21459	-3.51977	-1.87182
15	-1.1983	-2.11383	-4.06696	-4.25006	-6.56939	-4.4942	-9.49908	-6.99664	-7.05767	-6.14215	0.26654	-3.09039	-3.21246	-2.11383
15.5	-1.62342	-1.13514	-4.24793	-4.61415	-8.33729	-6.20106	-4.85828	-7.72693	-6.20106	-3.02723	-0.7079	-3.45448	-4.43104	-1.74549
16	0.69804	0.39286	-2.35372	-6.13789	-5.89375	-5.58858	-5.83272	-7.23653	-4.55098	-4.00167	1.61357	-2.47579	-3.26925	-1.49923
16.5	-0.09329	49.4673	103.972	161.772	226.957	293.364	376.494	461.821	563.261	708.281	842.924	927.946	1010.4	1133.21
17	-0.21323	48.6149	98.6027	159.272	222.931	290.985	370.88	460.541	584.931	727.509	863.984	978.607	1068.08	1188.81
17.5	-0.39421	48.8001	97.8114	160.372	230.136	306.674	379.367	483.309	614.779	745.944	904.574	1029.39	1104.4	1241.85
18	-1.73486	48.8633	103.673	158.055	234.227	301.915	397.74	494.481	635.594	763.036	910.619	1043.49	1140.35	1286.23
18.5	-0.87824	48.9265	102.149	165.809	234.412	308.753	402.503	503.638	650.123	772.864	925.025	1044.41	1158.73	1300.51
19	0.22252	46.0599	103.372	163.247	236.49	312.417	420.389	510.659	654.458	784.524	931.131	1057.53	1176.74	1324.07
19.5	-0.01949	44.4751	103.191	162.578	232.585	320.964	424.053	514.934	675.151	812.664	938.945	1069.56	1190.35	1364.85
20	-0.50565	44.4773	99.4699	166.67	237.47	322.92	425.642	520.307	681.196	800.642	928.205	1083.17	1225.02	1390.61
20.5	-3.73839	42.099	101.974	167.526	242.111	319.931	431.87	528.549	667.953	815.781	950.058	1088.18	1246.44	1422.29
21	-4.40765	44.1153	105.7	168.322	244.738	323.839	440.661	533.8	673.388	808.092	963.854	1098.5	1262.99	1433.82
21.5	-5.68725	47.1082	103.627	171.254	246.632	330.006	444.02	539.662	678.395	812.794	969.166	1099.29	1270.19	1460.56
22	-4.09822	41.6782	106.253	173.209	243.704	321.829	445.059	545.462	685.172	817.862	980.582	1118.7	1265.37	1476.13
22.5	-1.89882	43.4503	109.124	173.028	240.96	319.024	459.649	542.535	673.211	815.85	1003.11	1135.67	1264.28	1495.78
23	-0.55392	45.1004	107.539	179.744	237.239	322.993	456.966	550.41	673.885	824.092	1003.6	1143.79	1268.43	1512.08
23.5	-1.22318	44.7363	106.565	179.258	243.772	325.376	460.752	549.192	678.342	828.611	1002.8	1128.54	1271.05	1518.8
24	-1.83141	42.9684	105.713	178.833	234.436	327.942	447.876	550.598	685.485	834.533	1001.53	1136.72	1273.13	1525.88
24.5	-0.36444	45.1067	103.029	179.872	240.236	330.934	450.075	555.605	678.407	836.183	998.964	1139.16	1274.66	1515.26
25	-1.82716	47.062	102.909	180.119	246.403	336.735	449.894	559.635	686.832	828.007	1001.65	1131.17	1273.44	1516.54
25.5	-0.05501	50.6042	108.038	176.642	246.405	329.352	455.511	556.647	690.68	824.835	1003.73	1125.49	1292.3	1519.6
26	-1.70083	49.7518	107.918	174.813	249.215	334.42	463.326	557.32	689.522	821.419	998.97	1137.52	1276.31	1518.81
26.5	-0.78318	50.3032	111.827	179.759	239.512	337.596	466.99	551.219	699.107	816.783	998.728	1142.65	1281.81	1520.64
27	-2.73418	47.0705	112.195	174.451	240.674	326.612	447.339	555.31	700.086	810.62	999.646	1153.94	1284.99	1522.9
27.5	-4.74621	49.2699	112.991	175.308	235.671	314.468	445.022	551.162	706.374	822.341	998.55	1159.26	1288.47	1526.38
28	-2.72992	49.3941	106.706	175.249	235.795	333.208	456.254	542.924	706.743	829.851	1012.28	1149.8	1282.18	1530.35
28.5	-1.8733	49.6404	107.929	180.134	235.981	332.782	465.961	549.579	706.379	821.735	1014.36	1145.65	1286.33	1525.47
29	-1.99325	48.727	104.696	178.671	238.851	327.658	464.682	548.422	707.968	820.028	1016.62	1150.53	1292.56	1518.51
29.5	-1.4418	46.5929	105.309	176.537	246.727	319.969	471.825	543.663	694.054	823.57	1007.53	1140.65	1317.77	1505.76
30	-0.15794	45.6184	109.644	174.464	245.02	321.436	468.043	543.055	712.611	818.873	1011.07	1135.46	1307.21	1519.07
30.5	-0.76616	44.705	104.642	171.109	245.999	319.729	459.744	530.667	706.448	827.481	1016.45	1138.52	1316.98	1529.81
31	-1.86267	45.3175	107.146	171.782	244.658	324.675	473.357	536.162	713.286	832.427	1013.82	1141.45	1323.21	1522.06
31.5	-2.4709	45.0755	108.064	165.376	246.369	327.363	468.049	530.61	699.983	825.654	1001.25	1130.59	1315.95	1480.19
32	-0.75978	45.5659	104.465	170.871	250.766	324.802	460.666	530.673	700.107	830.844	1012.73	1152.44	1340.37	1496.86
32.5	-0.87973	45.568	103.307	178.258	258.031	319.616	461.462	533.971	697.485	843.969	1011.39	1154.94	1308.08	1484.72
33	-1.67106	44.2274	104.225	169.288	258.888	316.261	459.327	541.237	696.998	828.895	1011.15	1146.34	1313.15	1476.42
33.5	-0.87547	45.3281	106.974	174.173	253.946	318.583	455.484	543.68	701.456	837.381	1020	1153.79	1311.56	1471.23
34	-1.42266	46.3679	100.567	174.847	253.399	316.265	450.543	549.236	700.665	841.595	1019.88	1145.98	1324.57	1480.57
34.5	-3.80091	46.6141	102.095	169.173	250.533	315.413	454.695	551.436	693.098	837.447	1008.47	1137.31	1320.97	1480.33
35	-1.60152	44.9073	104.111	171.128	254.807	324.57	462.083	566.575	691.88	851.609	1015.43	1146.9	1310.35	1473.31
35.5	-1.23318	51.5622	102.893	174.548	257.556	319.018	454.394	556.14	710.437	851.916	998.706	1141.59	1302.48	1453.97
36	-0.6207	50.2216	98.1342	174.245	246.694	322.927	451.161	566.457	699.147	853.505	1014.52	1148.24	1295.22	1467.34
36.5	-1.71721	48.6978	99.2349	179.618	249.381	324.516	457.145	561.942	703.361	859.794	1012.56	1139.21	1303.03	1452.45
37	-2.81371	48.2727	101.801	178.339	240.961	324.03	450.311	559.259	697.748	848.688	1009.76	1145.99	1311.09	1437.07
37.5	-0.85846	47.7866	102.779	175.899	245.052	325.985	449.337	558.224	695.797	855.221	1012.33	1161.19	1296.44	1449.28
38	-2.50428	45.8966	102.232	176.573	243.345	329.71	449.766	572.264	695.494	852.232	1012.82	1146.3	1298.64	1468.69
38.5	-1.58663	43.5794	101.502	177.552	244.69	331.055	439.82	551.209	691.529	844.666	995.3	1151.31	1288.7	1465.21
39	-2.98831	45.2905	98.269	173.953	245.181	323.367	446.108	558.291	696.902	845.767	1006.29	1156.44	1311.28	1451.66
39.5	-1.52134	42.546	101.506	176.213	250.859	316.655	453.801	554.631	688.908	831.914	983.769	1149.85	1308.29	1445.68
40	-0.23748	44.8065	107.306	166.999	245.856	322.394	455.756	549.201	712.287	828.437	978.156	1145.58	1302.99	1450.32
40.5	-1.57812	44.7476	103.708	169.137	241.586	321.054	457.162	541.207	695.26	828.927	978.89	1144.3	1298.1	1443.25
41	-0.78254	45.36	103.466	172.069	241.649	325.939	463.268	548.168	695.506	811.534	968.944	1143.87	1283.4	1437.21
41.5	-2.18422	44.2025	105.299	171.4	246.229	316.847	459.486	561.964	694.288	806.226	969.251	1132.28	1275.53	1433.36
42	-1.93795	46.4629	105.911	166.763	250.748	321.426	449.966	563.248	695.999	825.027	977.493	1128.62	1297.87	1436.11
42.5	-0.04374	46.9533	104.387	170.488	260.576	332.964	447.039	562.273	692.949	829.79	972.918	1123.92	1289.69	1421.04
43	0.44667	45.9179	105.854	168.415	259.297	336.262	447.834	562.702	700.642	844.075	970.112	1112.69	1293.48	1433.55
43.5	-0.10052	47.8121	105.307	164.267	252.707	331.809	453.635	566.794	701.01	828.696	971.518	1109.46	1290.49	1426.17
44	0.57299	48.7908	102.807	167.687	258.874	333.703	448.022	569.665	701.318	834.435	969.506	1110.19	1284.02	1438.44
44.5	-0.1573	50.685	104.091	169.581	256.923	330.104	442.531	561.427	701.32	831.08	984.462	1120.08	1287.01	1450.34
45	0.82139	46.4757	110.379	172.33	259.427	338.895	453.153	555.326	699.979	833.097	980.741	1109.59	1291.17	1445.46
45.5	2.28836	48.3699	109.771	169.22	255.645	340.484	453.826	552.398	699.737	825.775	976.715	1112.76	1283.6	1439.36
46	1.06978	50.7524	105.135	164.705	255.098	334.505	456.331	554.048	697.42	824.8	961.946	1120.82	1280.61	1441.74
46.5	0.94984	47.4586	110.203	163.425	253.757	344.7	450.596	543.308	691.99	826.389	953.037	1104.34	1268.53	1409.89
47	1.013	49.597	106.116	169.958	249.609	343.237	457.922	533.301	678.32	829.077	950.781	1120.64	1263.04	1408.06
47.5	0.22167	49.1719	106.24	169.106	256.447	342.69	455.361	537.27	678.322	835.366	961.159	1123.45	1252.48	1405.25
48	-0.8138	48.3195	108.5	175.151	264.506	342.204	454.63	539.103	686.015	835.978	962.809	1122.6	1250.71	1410.56
48.5	0.47006	54.181	104.84	174.054	261.517	348.981	460.675	539.105	681.073	834.699	959.515	1118.45	1258.95	1409.04
49	0.53323	55.648	105.209	176.314	260.482	331.222	463.79	530.318	691.207	837.325	957.564	1103.01	1252.61	1396.47
49.5	-2.02812	49.9128	106.187	174.608	267.503	335.985	468.004	520.738	687.913	836.9	953.355	1100.21	1251.82	1386.16
50	2.73475	51.807	103.687	174.06	265.918	339.344	456.958	537.891	697.071	844.287	953.235	1097.34	1246.81	1407.34
50.5	1.76031	47.9029	103.567	175.466	264.639	339.773	450.063	542.837	701.833	831.96	946.157	1106.13	1259.57	1397.51
51	1.64037	48.3323	101.555	182.915	262.444	343.376	446.281	544.121	687.92	839.653	945.793	1119.5	1262.63	1393.42
51.5	1.45939	46.6254	102.412	185.847	259.272	336.725	449.396	537.775	684.748	850.092	949.885	1121.39	1254.08	1398.19
52	2.62118	46.0782	102.231	178.28	259.213	338.009	461.606	545.651	692.868	836.911	938.656	1100.34	1240.6	1386.65
52.5	0.85329	41.1365	102.294	173.033	257.811	344.359	465.453	543.395	681.517	842.528	941.039	1098.39	1242.67	1384.09
53	2.01508	39.0634	103.272	176.026	250.977	330.934	455.689	552.003	685.12	845.826	940.614	1098.45	1237.92	1371.7
53.5	1.34582	37.6007	102.908	170.718	254.398	330.936	450.015	551.944	688.968	842.715	945.804	1101.08	1235.72	1366.76
54	-0.72725	42.2415	100.469	170.904	255.62	331.67	448.552	552.434	688.299	817.022	937.566	1090.4	1240.3	1363.41
54.5	1.89939	40.2295	108.955	169.99	257.332	331.123	450.813	542.549	688.911	821.846	920.601	1087.78	1240	1370.49
55	-0.29575	39.8043	105.173	172.617	251.779	338.144	449.594	552.317	687.57	818.003	931.589	1083.14	1233.83	1359.81
55.5	-3.16227	44.8114	104.565	174.145	252.087	338.696	444.164	548.534	693.737	818.798	948.193	1084.3	1221.57	1364.94
56	-0.96288	41.2734	108.168	169.752	255.324	334.12	442.641	551.283	691.237	812.575	943.19	1073.68	1227.13	1364.45
56.5	-2.85284	43.9611	105.851	174.149	249.344	342.179	442.032	540.909	692.643	809.403	930.802	1088.52	1229.02	1378.92
57	-2.05726	45.0619	104.754	173.175	251.788	339.434	431.72	547.93	688.678	812.152	931.842	1099.38	1232.99	1371.36
57.5	-1.32271	45.2471	108.418	170.125	262.532	341.939	426.839	541.829	687.398	803.67	929.036	1087.42	1226.89	1358.05
58	-0.52713	43.6623	106.223	166.038	266.38	344.138	430.747	543.479	683.433	804.954	946.494	1082.42	1223.65	1355.8
58.5	-0.525	41.5282	107.263	165.979	257.104	336.755	439.05	543.298	680.688	803.125	945.032	1080.77	1207.85	1334.01
59	2.83406	42.9952	104.458	168.361	248.806	337.002	430.324	540.615	685.695	797.573	944.484	1075.4	1198.51	1310.21
59.5	0.33375	47.0867	102.446	169.95	247.282	330.168	440.641	531.95	682.707	783.903	937.04	1076.14	1186.98	1323.15
60	-0.76276	46.4785	105.011	173.798	250.458	334.015	437.164	548.37	679.474	791.84	930.878	1081.57	1192.78	1330.66
60.5	-0.6996	45.382	107.027	169.283	246.249	329.501	444.796	541.537	685.519	777.804	931.307	1082.49	1200.66	1317.78
61	0.70634	45.7503	106.907	170.628	246.922	329.137	449.376	540.013	677.586	773.411	930.272	1076.63	1204.5	1316.87
61.5	-1.24466	48.8042	104.529	169.837	241.431	330.42	444.617	545.63	672.217	760.84	918.189	1086.4	1202.8	1328.04
62	-0.75425	46.8532	105.264	169.534	248.635	329.385	444.192	554.421	673.074	779.58	939.248	1097.02	1196.63	1329.2
62.5	-1.0573	50.4564	108.806	164.775	248.332	330.058	431.987	552.898	669.17	770.244	944.438	1088.48	1184.18	1315.41
63	-1.11621	48.4443	106.55	168.623	246.198	330.61	433.82	552.228	671.979	771.955	948.469	1082.93	1187.18	1292.89
63.5	-2.76203	52.2306	109.36	163.559	239.853	337.57	438.827	546.432	665.085	787.033	946.029	1066.27	1194.32	1297.23
64	0.84117	52.4159	107.348	170.519	239.977	329.638	433.764	543.566	659.41	773.912	955.919	1052.66	1196.15	1294.73
64.5	-2.69674	50.1597	106.312	175.282	236.622	334.339	436.268	539.967	669.972	765.37	947.804	1040.39	1197.25	1307.24
65	-4.09843	49.0632	106.863	173.636	241.507	327.506	438.529	545.462	666.8	777.823	947.257	1029.47	1183.83	1290.34
65.5	-3.48595	52.1171	105.401	173.699	242.486	320.245	437.127	543.816	664.178	777.459	930.596	1027.7	1186.52	1300.59
66	-3.42279	52.2413	105.952	171.992	236.445	317.378	440.059	541.987	656.306	783.503	931.331	1018.85	1170.59	1309.93
66.5	-5.31275	53.9524	100.705	174.863	243.65	321.53	436.826	542.356	667.478	777.951	932.309	1029.23	1177.18	1319.27
67	-4.7613	48.6444	107.849	167.602	242.187	319.946	436.889	540.954	665.893	770.385	923.217	1019.96	1169.25	1315
67.5	-3.0502	45.2286	108.827	169.618	238.1	322.572	435.67	536.989	656.618	789.003	917.543	1032.78	1157.59	1324.83
68	-0.54563	44.01	111.027	176.395	233.646	324.955	435.612	537.968	656.62	781.681	928.287	1033.63	1163.52	1312.02
68.5	-1.7642	45.538	106.756	174.749	235.418	315.374	436.712	542.364	661.016	789.557	929.998	1040.29	1145.45	1301.4
69	-1.51794	45.1129	101.448	174.874	225.838	323.983	442.818	534.615	663.033	788.338	905.159	1040.17	1148.02	1294.08
69.5	-1.02753	43.1009	99.8025	171.885	229.868	328.501	441.416	535.227	670.359	782.725	907.481	1040.35	1169.63	1303.23
70	-1.94093	40.2954	96.5088	171.033	223.706	326.55	445.203	539.624	663.892	783.337	906.872	1052.44	1152.6	1284.99
70.5	-1.51156	39.5041	98.3419	168.654	223.647	322.524	450.332	558.181	665.542	778.029	909.072	1065.81	1172.74	1285.29
71	-1.50943	39.3841	94.9871	167.802	226.213	315.446	452.47	550.004	668.229	775.407	919.45	1063.92	1164.02	1286.45
71.5	-2.60594	39.9356	99.5059	165.119	234.76	320.819	448.322	547.626	675.434	778.034	918.414	1065.63	1176.9	1289.08
72	-2.2376	42.6232	101.034	163.595	240.56	322.225	438.802	538.717	670.004	780.965	918.478	1063.44	1182.52	1273.46
72.5	-1.0758	40.7333	102.562	162.193	229.454	327.11	442.711	540.489	669.09	805.138	915.977	1045.13	1171.35	1270.59
73	-3.57612	40.9185	105.738	167.261	237.513	329.676	439.966	539.698	667.933	796.412	920.679	1050.75	1173.3	1264.31
73.5	-1.13259	42.9348	105.801	167.691	240.567	330.777	435.086	545.559	654.812	783.718	917.446	1035.55	1164.15	1262.91
74	-0.27597	44.2187	104.521	173.674	234.831	331.694	442.046	556.548	661.772	795.073	922.576	1047.64	1139.49	1252.47
74.5	1.25204	44.8922	104.279	175.08	237.397	322.114	437.836	558.564	651.521	783.112	930.268	1053.31	1149.14	1239.29
75	-0.02757	46.5423	101.779	168.613	245.09	316.562	436.74	553.378	646.762	766.086	916.354	1054.42	1146.46	1245.09
75.5	-1.00201	49.2299	99.706	164.281	246.129	328.344	432.225	552.404	649.389	772.802	907.079	1049.47	1136.82	1233.43
76	-0.32849	45.5699	102.272	167.274	241.066	322.059	430.946	557.777	654.762	750.16	902.748	1049.11	1132.12	1229.53
76.5	0.22295	46.0603	102.518	169.779	243.692	317.362	438.333	551.309	657.266	747.415	912.149	1034.16	1121.38	1215.92
77	-0.87356	46.1235	102.703	172.039	242.901	314.983	433.331	554.058	653.912	752.178	909.283	1032.33	1133.95	1215.31
77.5	-2.51938	48.6281	103.621	166.853	245.833	327.437	431.99	557.844	655.317	744.49	921.309	1038.62	1125.41	1195.72
78	-0.8693	50.6444	100.144	167.649	249.802	322.312	434.433	553.33	655.442	743.21	922.715	1027.76	1120.71	1207.44
78.5	-0.50097	49.1816	101.794	163.806	251.391	319.812	433.764	556.262	650.866	749.743	909.899	1033.01	1130.6	1203.91
79	1.27118	53.2121	103.81	167.958	251.271	322.438	443.044	554.86	645.009	747.548	891.042	1046.62	1118.15	1205.8
79.5	0.11364	49.6742	99.4789	174.979	250.846	323.417	429.801	555.106	642.631	743.827	896.415	1037.96	1135.73	1195.24
80	-1.65425	46.0142	97.5279	173.211	244.745	312.677	436.09	544.366	652.582	760.614	905.145	1035.45	1122.67	1200.86
80.5	-0.5535	45.8332	99.4831	176.021	258.48	312.435	431.514	551.265	647.64	759.456	902.584	1043.57	1117.73	1219.91
81	-0.91758	44.4926	94.6024	175.657	249.51	313.23	430.296	532.224	646.482	763.914	898.619	1029.54	1102.96	1217.59
81.5	-5.37102	49.2555	96.1915	172.73	250.855	314.087	428.406	529.419	638.672	763.611	901.611	1045.17	1093.57	1207.52
82	-4.02612	46.6941	97.4143	171.694	255.862	314.333	425.539	538.027	643.313	767.58	907.29	1043.34	1103.33	1212.83
82.5	-3.90192	46.391	103.642	167.119	258.793	318.303	426.579	533.207	633.183	748.356	924.687	1043.95	1104.5	1198.98
83	-3.96083	44.44	96.1979	158.332	258.734	317.389	427.68	535.346	635.932	762.397	918.891	1042.49	1099.31	1205.08
83.5	-4.63009	46.7615	99.1297	160.836	251.107	320.016	426.705	530.221	624.825	761.788	905.831	1033.15	1108.41	1204.72
84	-2.12552	47.8623	97.6059	162.791	247.081	323.863	424.693	532.664	632.152	766.795	905.772	1022.9	1099.38	1200.57
84.5	0.50112	47.132	99.5612	164.93	243.482	322.095	432.264	534.62	623.67	769.971	900.037	1016.92	1090.89	1189.95
85	0.13703	44.6317	102.615	166.153	240.005	317.947	427.993	540.664	629.104	750.564	902.115	1000.75	1097.49	1177.57
85.5	2.15332	44.0845	94.6216	162.065	240.312	320.207	424.822	538.286	619.646	747.27	896.013	1005.57	1095.54	1178.36
86	1.78923	44.0256	93.403	157.429	240.62	322.834	422.749	534.809	627.583	764.79	886.372	1007.89	1095.91	1169.76
86.5	2.70689	45.3094	96.64	158.896	240.927	325.278	422.385	539.267	635.214	749.777	886.313	1007.59	1099.57	1178.37
87	-0.15964	46.2271	94.5669	161.156	245.019	327.721	426.415	543.114	639.062	752.526	890.221	1005.7	1102.68	1171.72
87.5	2.16183	45.4357	95.8508	159.327	241.725	328.578	428.309	554.774	636.561	743.251	894.435	1007.29	1083.77	1184.11
88	2.40809	44.7055	94.327	159.696	237.21	329.007	424.893	554.288	634.427	754.971	888.272	1007.96	1067.17	1166.17
88.5	4.05817	42.8765	92.0708	164.214	241.485	328.582	416.839	548.37	637.847	747.771	885.04	996.49	1073.52	1176.97
89	1.06957	45.8083	91.7068	164.644	238.863	330.72	404.817	543.55	639.131	736.299	880.464	994.966	1068.09	1173.19
89.5	1.68205	45.9325	93.9672	162.021	239.902	327.854	404.087	547.886	638.157	747.287	877.842	993.93	1087.38	1175.27
90	-0.51309	44.9581	98.4859	163.549	242.956	327.002	413.794	548.681	642.919	754.736	884.436	996.679	1078.22	1184.97
90.5	-0.7551	42.0916	102.333	173.256	240.212	326.027	413.307	549.233	629.128	753.334	888.039	981.423	1079.32	1171.91
91	-0.26469	43.1923	103.007	170.695	243.815	322.123	417.094	539.835	624.003	747.172	878.092	980.936	1090.86	1184.67
91.5	1.32435	46.9787	102.887	170.453	242.779	317.67	421.918	539.044	627.423	752.301	873.089	981.061	1091.9	1181.62
92	2.60821	46.2484	105.33	167.342	243.087	322.066	428.573	554.427	614.73	745.101	871.199	985.518	1083.17	1172.96
92.5	2.5493	45.7622	102.525	164.964	245.896	326.89	424.668	554.551	612.107	747.178	868.638	978.99	1087.82	1163.32
93	1.6359	44.4216	105.396	158.435	248.218	333.606	432.544	554.309	631.702	746.692	870.715	974.658	1089.59	1172.11
93.5	-0.25406	47.4144	103.384	160.635	259.023	318.166	430.105	557.485	637.197	743.948	865.53	988.882	1068.04	1165.76
94	1.09084	47.7827	105.766	163.505	262.565	321.464	427.116	562.126	632.866	746.025	880.424	1002.25	1056.51	1172.54
94.5	2.74092	45.7097	103.754	162.043	254.633	317.194	429.682	557.672	636.469	739.313	868.402	972.65	1058.47	1166.07
95	0.11853	46.5052	108.09	161.495	248.349	325.863	436.703	554.867	634.213	730.465	872.799	978.329	1052.3	1165.89
95.5	0.3648	50.9019	107.604	167.54	246.703	314.757	437.499	550.414	636.656	735.289	880.553	981.139	1057.55	1156.68
96	-1.46413	48.6457	110.841	166.993	242.188	321.9	439.82	550.904	640.87	745.728	882.935	964.722	1049.13	1157.72
96.5	-1.462	51.2724	104.495	168.643	245.486	324.405	432.315	553.653	642.032	748.782	868.472	972.476	1042.36	1153.2
97	-0.05607	47.6124	105.169	166.143	244.817	333.013	439.702	552.922	642.339	746.953	870.061	966.924	1037.54	1163.15
97.5	-2.73949	44.5628	107.673	168.22	243.049	322.761	442.451	553.23	641.975	732.856	867.5	977.973	1024.24	1165.05
98	-0.41803	43.8935	108.53	164.865	242.563	321.298	441.11	559.091	636.057	739.999	874.216	955.392	1023.08	1150.64
98.5	-3.46766	44.8722	105.907	159.801	240.185	329.174	434.765	549.755	635.021	750.866	863.048	968.334	1024.55	1161.69
99	-1.08516	47.9261	100.05	160.719	244.276	320.509	426.527	552.748	631.117	746.412	853.773	964.064	1023.94	1157.06
99.5	-2.97512	49.6372	100.113	164.933	243.729	330.46	434.525	543.961	627.945	743.668	854.386	963.028	1039.08	1136.61
100	-3.58335	46.8927	99.1998	165.728	246.417	322.955	439.41	536.639	629.412	737.2	857.562	974.627	1032.24	1149.37
100.5	-2.78776	46.1014	100.423	164.815	247.517	325.093	431.66	541.646	640.95	736.226	862.324	965.962	1037.19	1151.94
101	-2.48046	47.3853	101.584	170.066	250.632	318.381	425.864	543.174	643.821	725.486	849.692	955.222	1018.94	1147.36
101.5	-2.05109	45.4953	106.164	164.758	246.911	320.642	417.138	544.152	638.879	711.694	841.577	948.877	1013.39	1145.71
102	-4.85657	46.2298	97.3773	167.995	247.28	335.17	415.493	538.661	626.918	717.617	858.303	959.255	1032.44	1149.56
102.5	-4.2441	44.2178	101.225	172.88	245.695	334.196	419.828	548.307	634.367	726.957	867.338	946.867	1027.86	1156.64
103	-4.73025	44.281	101.349	172.577	246.307	322.357	428.009	549.957	642.731	715.851	851.532	964.203	1021.39	1161.71
103.5	-3.26328	43.6728	97.3226	173.067	243.868	320.284	431.856	537.569	636.141	719.454	852.816	950.716	1015.05	1153.84
104	-3.01702	45.3228	102.33	171.727	251.377	320.225	433.14	536.229	640.354	724.766	830.418	957.432	1008.64	1153.78
104.5	-2.28247	43.677	105.139	167.7	253.211	323.218	442.786	529.517	634.009	721.655	848.548	952.551	1014.75	1144.45
105	0.28313	45.3881	106.057	168.252	259.072	326.028	432.351	541.726	631.875	729.409	854.958	962.807	1014.57	1129.49
105.5	-1.54579	42.9488	103.679	166.423	256.999	322.978	433.94	541.728	633.525	730.083	866.984	957.683	1008.71	1129.98
106	-0.01779	44.4768	101.178	170.27	255.475	324.262	423.627	536.176	631.086	728.864	856.366	957.441	1016.4	1123.82
106.5	-3.79984	40.9389	98.1289	163.314	254.928	316.452	426.681	531.845	621.749	732.589	849.227	953.476	1025.62	1122.05
107	-4.22496	45.1525	97.7648	160.326	259.874	311.449	438.036	541.429	631.273	726.976	848.802	954.698	1015.55	1115.34
107.5	-5.32146	43.3235	97.3397	166.798	261.951	320.484	434.742	530.994	626.026	731.983	851.551	955.86	1018.97	1117.05
108	-3.48828	44.6074	97.647	162.405	253.042	319.144	427.542	538.748	623.343	739.432	857.168	959.646	1020.19	1118.22
108.5	-3.9134	42.5954	96.0622	161.431	252.556	321.221	428.582	536.248	631.524	720.879	855.95	955.925	1018.06	1107.48
109	-4.15542	45.0999	94.2943	163.02	247.493	317.988	429.499	533.992	638.362	728.205	852.412	952.998	1022.88	1109.19
109.5	-3.42087	45.1021	95.2119	161.862	249.57	323.056	425.534	527.768	634.213	734.311	842.404	953.366	1013.91	1100.64
110	-1.89286	44.9821	100.158	169.128	250.732	324.767	427.673	525.573	616.271	730.285	836.486	951.415	998.107	1093.81
110.5	-0.36486	44.9232	98.0238	164.308	251.832	334.352	423.158	519.41	626.283	725.099	830.934	949.83	1007.45	1093.45
111	-0.42377	43.9488	97.6597	169.864	255.191	324.466	421.756	519.291	626.651	730.167	832.035	946.781	1001.59	1086.67
111.5	-1.64234	45.1106	92.9011	166.876	248.785	325.262	422.552	528.204	628.973	737.86	826.238	931.768	990.789	1080.69
112	-0.84676	45.54	94.0629	166.267	252.815	326.485	418.343	523.018	631.355	738.472	830.391	923.836	985.725	1087.23
112.5	-1.21084	45.9083	96.5064	165.293	248.118	329.783	435.007	523.264	627.085	752.268	820.2	922.983	996.042	1084.24
113	0.74441	46.7039	94.5554	164.563	245.373	326.245	425	522.656	621.899	725.781	823.376	922.802	995.556	1097.3
113.5	0.01411	46.8281	98.2197	164.016	244.033	322.524	425.795	523.94	615.187	738.112	816.054	922.072	999.648	1083.63
114	0.50452	46.9523	98.1608	170.426	245.683	324.723	424.821	523.759	618.241	736.649	814.958	934.159	995.194	1078.87
114.5	-0.40888	46.4661	102.679	169.574	245.746	327.777	423.602	513.019	626.727	732.928	814.288	933.429	981.769	1083.88
115	-2.0547	45.6748	103.292	167.623	245.748	323.08	431.783	503.255	627.462	732.32	810.262	931.722	998.556	1068.81
115.5	-1.99154	48.9728	107.017	166.282	253.38	329.002	422.569	509.544	613.121	721.214	819.481	942.405	997.886	1069.24
116	-2.23355	48.6698	104.578	166.468	257.044	317.652	415.491	520.655	605.005	719.873	826.868	938.135	998.682	1064.05
116.5	-0.15623	47.146	100.735	164.639	259.182	321.56	425.503	519.497	608.242	724.88	844.875	941.128	993.252	1038.85
117	-1.25274	47.2092	106.963	157.439	259.428	326.445	422.209	502.47	609.831	726.347	835.539	929.9	996.855	1046.23
117.5	-0.45715	45.2582	104.218	152.192	262.299	317.902	425.69	507.721	609.955	723.725	834.076	932.77	986.908	1059.97
118	0.09429	47.0914	102.633	151.217	258.212	318.576	416.781	506.32	609.958	713.595	824.069	932.223	983.92	1060.27
118.5	-0.20876	47.0935	101.171	153.173	257.848	320.287	416.661	509.923	604.1	723.973	817.235	922.582	986.363	1060.58
119	-1.30527	45.8749	102.76	156.471	248.084	315.467	409.156	506.751	596.961	727.149	812.782	925.147	995.399	1060.34
119.5	-0.26554	45.2056	100.748	155.862	245.645	321.939	419.473	510.293	600.748	726.724	810.525	926.309	983.072	1057.9
120	-0.14135	45.3299	97.2097	160.259	245.525	316.448	428.386	512.249	600.811	722.393	798.626	928.936	981.365	1050.33
120.5	-0.87164	48.2617	93.6718	162.519	239.424	312.971	435.957	518.599	597.334	707.197	807.539	921.186	990.278	1045.82
121	-2.21229	44.1134	98.7399	173.813	235.764	311.63	427.597	520.065	600.144	709.458	806.626	929.184	994.919	1042.22
121.5	-0.86739	44.2376	98.0706	174.365	234.301	327.99	436.449	523.974	607.104	713.793	807.848	919.543	977.526	1048.02
122	-1.29251	47.0473	102.528	176.808	232.411	323.476	437.489	519.887	612.05	714.345	806.813	917.042	984.974	1058.09
122.5	-0.86313	46.256	100.272	178.946	236.014	329.398	435.721	518.79	603.568	713.859	803.336	924.369	973.868	1072.44
123	0.48177	44.305	98.9925	181.207	240.96	329.522	430.841	511.163	609.368	720.269	801.507	934.564	967.095	1062.98
123.5	0.30079	44.1851	101.741	175.044	237.85	320.979	422.542	510.31	619.136	726.192	805.232	939.327	974.483	1055.96
124	-2.68781	44.0041	100.095	172.727	230.833	323.972	428.587	514.524	620.176	718.259	804.624	930.235	979.612	1062.44
124.5	-1.46498	45.8983	102.051	174.927	234.497	319.336	426.697	509.094	612.976	708.984	810.119	923.279	975.891	1046.81
125	-3.47701	46.6939	98.5738	176.333	239.443	318.544	434.389	505.739	620.119	692.873	801.76	929.14	989.565	1038.15
125.5	-4.0242	48.9543	97.9045	177.067	234.989	328.434	434.941	517.155	611.088	700.199	799.443	935.002	981.999	1037.11
126	-2.74034	49.8109	95.2211	173.163	232.367	325.507	434.515	506.476	612.25	686.53	792.548	932.257	989.752	1035.71
126.5	-3.34856	47.982	95.2232	172.982	235.482	324.593	426.278	497.445	606.637	700.143	803.902	924.691	982.369	1050.24
127	-1.69849	47.4348	94.4319	164.744	239.146	327.464	421.458	505.198	607.737	712.291	809.337	931.407	984.08	1050.12
127.5	-1.14704	45.9111	90.955	159.436	244.092	325.025	418.714	503.614	611.524	709.546	801.526	929.761	973.706	1056.41
128	-2.42665	42.8614	96.023	159.805	239.212	314.59	416.397	502.09	607.742	725.173	794.753	925.125	976.028	1047.5
128.5	-0.83761	43.4129	102.007	157.488	239.946	313.982	410.112	495.683	604.875	728.655	796.465	921.159	979.997	1058.24
129	-3.03275	44.8798	103.901	161.152	228.718	315.021	410.297	494.953	610.493	718.281	809.284	916.706	972.065	1068.93
129.5	-3.76305	45.2482	97.3112	159.933	239.828	316.794	421.042	500.143	621.725	722.677	809.897	907.919	965.048	1056.66
130	-3.76092	45.7996	100.67	152.428	241.417	314.72	417.382	502.159	617.455	709.74	811.119	903.344	952.172	1057.88
130.5	-0.4629	48.4263	99.7568	152.674	235.743	324.122	417.933	491.664	622.035	696.314	800.135	907.862	954.432	1058.62
131	-0.15559	44.5832	99.881	151.822	228.238	320.218	419.461	493.558	602.628	693.143	795.316	914.456	941.678	1054.71
131.5	-0.09243	47.3929	100.86	152.007	229.156	315.276	408.111	494.658	596.404	701.507	803.557	928.13	939.849	1045.74
132	-0.63962	48.4326	99.1529	148.713	232.087	311.677	405.427	507.539	613.252	705.903	792.207	923.677	937.776	1038.42
132.5	0.217	48.1296	99.6433	154.636	235.263	311.496	409.397	512.79	594.943	701.999	800.083	921.909	944.736	1044.47
133	0.76844	47.9486	96.9598	154.638	234.533	309.362	408.849	520.483	587.377	707.006	795.995	909.582	935.461	1030.25
133.5	1.13678	46.4859	94.7037	158.73	236.549	311.623	398.781	519.569	601.906	714.516	807.777	910.133	952.553	1037.94
134	1.74926	50.4553	100.138	159.342	240.397	317.789	397.623	524.637	597.025	714.518	808.329	909.098	957.621	1031.41
134.5	-0.32381	49.5419	100.384	160.87	242.352	314.862	400.494	534.161	592.205	705.975	807.782	907.696	946.148	1019.15
135	2.36386	46.6754	97.5787	166.793	242.781	311.751	410.933	531.539	601.241	697.859	800.582	910.323	954.39	1019.88
135.5	1.99978	51.1941	100.999	172.41	249.986	313.706	406.052	523.24	595.506	697.129	803.452	910.996	957.322	1022.93
136	1.63569	50.6469	104.114	171.802	243.823	313.037	413.562	513.232	597.034	689.685	803.76	907.58	962.573	1016.22
136.5	1.39368	50.0387	105.214	171.621	240.224	318.837	422.414	506.154	593.862	692.983	800.771	903.554	973.317	1012.69
137	-1.16767	47.7215	106.559	168.388	235.344	318.534	420.219	490.837	580.314	705.009	789.054	903.312	972.038	1022.94
137.5	-1.28761	45.7095	105.28	166.864	235.346	311.334	417.719	486.566	575.372	701.105	794.55	884.943	976.373	1017.33
138	-1.40756	44.2467	104.183	165.218	236.141	312.74	419.43	490.353	570.187	707.455	785.702	888.119	950.192	1009.27
138.5	-1.28336	46.7513	105.162	161.009	235.472	309.08	413.389	487.12	582.03	701.903	783.934	890.257	954.832	1002.26
139	-0.60985	45.7769	103.882	158.997	238.587	313.66	416.26	489.014	584.29	701.905	793.152	893.311	951.294	999.451
139.5	-2.49981	46.0842	104.373	157.84	237.674	312.197	426.699	493.96	582.522	690.249	796.023	892.398	950.015	1010.99
140	-1.88733	46.6356	99.7362	161.687	238.469	322.881	427.373	507.268	588.384	689.763	810.735	895.94	946.782	1012.82
140.5	-1.03071	46.5767	100.593	163.581	246.65	324.287	429.084	499.946	585.578	690.742	796.943	906.196	953.437	1013.56
141	-0.96755	49.3254	102.609	161.02	236.642	323.251	420.968	499.154	591.623	693.49	803.11	892.648	951.913	1009.41
141.5	-0.35507	47.4355	99.6815	163.768	232.982	318.432	417.98	503.856	594.31	680.736	798.9	892.955	947.094	1006.91
142	1.53914	45.9117	100.05	162.611	235.67	315.87	416.151	509.718	594.435	685.194	803.419	894.117	949.598	995.252
142.5	-0.04564	47.928	105.057	167.74	236.343	316.666	413.712	515.946	590.103	692.032	798.538	894.119	947.525	999.649
143	1.42133	45.1225	101.946	169.695	238.97	319.964	409.197	520.769	595.904	698.504	805.437	881.487	927.325	1000.99
143.5	1.91173	43.4156	103.657	169.88	238.911	317.097	399.251	525.166	605.549	692.952	787.19	872.639	934.041	1010.94
144	0.57109	43.4788	101.157	170.554	235.74	312.522	403.342	530.539	584.067	685.447	787.558	874.717	935.324	1001.43
144.5	0.81735	42.2602	101.647	172.021	235.803	313.745	408.105	514.428	596.643	681.481	788.049	869.714	942.773	1003.81
145	-0.46226	43.9713	105.373	166.347	235.744	317.409	408.168	516.2	600.246	672.511	797.939	858.791	948.634	983.119
145.5	-0.64324	45.8655	104.459	167.875	238.004	309.537	414.213	513.273	593.656	682.767	791.654	856.595	939.847	991.056
146	0.15235	48.187	104.156	163.238	231.476	314.239	415.558	509.491	584.442	697.723	784.088	855.316	937.774	995.514
146.5	-0.39484	50.8137	99.2145	160.25	226.107	309.359	412.325	516.207	602.022	705.11	799.471	870.943	938.814	992.464
147	1.80455	51.6703	106.358	161.717	230.564	308.506	413.243	518.345	607.334	700.108	797.886	864.475	937.534	995.457
147.5	1.80668	50.5127	101.477	164.404	235.144	308.752	412.329	530.188	602.637	703.162	796.24	864.844	938.452	1004.68
148	0.03878	49.1721	99.8313	161.538	238.93	302.773	412.087	530.068	604.836	695.717	791.237	878.274	941.628	994.973
148.5	-0.81358	49.2963	102.58	161.418	239.299	304.24	413.188	518.29	607.829	699.321	789.836	874.553	934.489	997.05
149	1.62995	48.9322	98.981	158.307	236.493	313.703	412.946	503.827	610.028	684.674	794.171	870.404	940.839	996.259
149.5	1.3269	51.9861	98.8611	162.643	236.739	314.315	422.714	504.318	607.101	677.047	787.887	887.252	933.822	999.13
150	0.77971	50.8896	98.558	159.288	227.037	308.092	419.298	510.728	619.493	676.561	787.096	883.104	930.528	1003.47
150.5	3.22325	50.5255	97.5225	157.154	228.26	317.188	411.487	499.683	613.758	682.544	796.375	882.435	910.755	993.702
151	0.05154	47.1097	98.4402	155.752	225.393	317.74	418.814	513.784	599.356	691.58	780.264	867.666	922.659	993.521
151.5	0.84713	48.1494	97.0996	152.275	224.48	319.573	423.027	512.505	603.02	684.197	780.449	873.1	912.956	997.795
152	-0.43248	47.1749	95.942	152.705	221.369	316.401	430.048	495.6	615.29	680.903	774.043	859.675	910.029	982.111
152.5	1.21759	44.1863	97.1649	155.331	224.301	316.281	431.332	488.4	597.287	665.219	784.36	859.006	910.641	978.329
153	-0.97755	44.1274	92.3452	156.249	225.585	315.856	430.297	495.238	596.496	683.593	783.385	871.886	900.512	979.796
153.5	1.58806	45.8996	93.2629	159.852	219.239	315.736	425.904	508.973	607.24	683.534	778.199	862.672	903.993	991.395
154	0.73569	46.0848	93.0819	160.098	228.092	314.884	415.409	510.013	597.843	682.437	786.258	858.829	908.512	993.045
154.5	-1.27634	43.9507	94.0606	156.194	226.751	322.759	422.308	502.935	604.62	691.595	776.373	873.418	911.749	992.681
155	-2.18974	41.9997	94.0627	151.497	230.232	315.559	410.286	506.721	607.979	688.667	783.333	883.858	901.619	991.096
155.5	-3.46935	43.955	89.9144	154.429	229.868	316.294	412.058	512.461	629.038	683.909	790.781	877.268	890.268	993.357
156	-3.65033	43.2857	92.7852	152.966	236.279	313.183	406.445	494.091	628.735	684.521	773.999	876.049	906.811	987.438
156.5	-1.63405	42.9216	97.9143	150.099	233.84	315.871	404.86	492.384	620.192	682.387	775.221	885.329	919.386	982.008
157	-1.81502	44.6938	97.5502	150.407	237.748	312.577	399.857	492.509	619.462	685.502	773.026	875.932	906.022	971.146
157.5	-4.2543	43.17	97.003	154.132	234.393	319.537	398.273	499.164	615.008	692.767	770.282	872.455	909.259	973.956
158	-3.03147	44.0266	100.24	162.557	241.536	322.225	395.284	499.532	612.63	690.572	754.049	853.292	912.435	970.601
158.5	-3.09038	46.4091	100.547	156.089	245.384	333.58	399.681	480.003	619.834	688.316	766.624	866.05	911.521	974.754
159	-2.84412	45.923	101.648	162.805	245.203	325.464	396.021	488.306	605.859	692.224	776.819	865.747	912.317	964.258
159.5	-3.45234	46.4744	100.796	151.272	247.28	320.644	386.135	484.646	606.838	687.099	781.277	850.002	913.601	973.965
160	-3.9385	44.0962	97.1967	163.42	246.855	326.75	377.775	488.859	597.502	689.238	776.03	839.323	907.072	984.404
160.5	-2.28842	46.0514	101.715	159.943	244.049	324.677	391.144	495.087	596.894	696.442	782.013	850.617	915.192	988.068
161	-1.98112	48.9832	103.305	158.358	246.188	319.369	394.015	503.39	596.53	683.322	783.908	856.906	905.306	969.332
161.5	-0.88036	52.3423	102.513	159.642	237.462	322.545	396.947	494.237	596.471	677.525	779.149	860.326	910.619	964.207
162	-2.15997	52.4055	100.379	155.25	233.985	314.124	392.005	491.614	589.271	678.504	775.001	862.83	898.047	966.224
162.5	-1.7306	53.5673	99.1605	163.614	235.757	320.474	399.209	492.715	590.493	683.145	765.359	870.584	903.116	976.663
163	-1.36226	53.4473	100.261	155.498	236.126	319.927	401.714	509.929	597.393	678.081	763.591	864.36	906.108	979.717
163.5	-2.82498	52.2898	98.6765	146.162	234.175	319.074	394.88	499.25	606.489	681.44	762.8	873.762	896.223	979.17
164	-3.61631	49.5453	97.2138	149.948	235.703	316.818	390.976	495.285	584.824	686.081	769.821	864.975	887.009	991.806
164.5	1.75691	48.0216	97.1548	151.903	237.108	319.14	402.453	501.147	583.788	676.073	773.546	863.146	900.866	1004.87
165	1.45387	47.5354	94.1663	150.319	236.378	316.151	398.793	490.467	590.199	672.657	777.15	853.383	903.37	986.256
165.5	0.17425	48.6362	95.206	152.213	238.883	311.392	410.819	493.643	589.774	668.692	778.25	857.047	901.175	987.479
166	-0.3119	47.1735	94.3536	154.9	238.03	312.493	416.436	491.448	584.954	672.784	776.91	846.612	895.318	975.335
166.5	-1.71358	45.9549	94.783	156.062	228.816	315.852	414.851	491.939	567.012	663.936	779.414	841.731	904.353	982.112
167	-4.397	44.9804	98.3252	154.416	235.593	306.699	405.271	487.913	570.005	663.328	764.829	857.358	897.519	972.226
167.5	-2.13658	45.776	90.82	153.686	231.75	310.241	406.799	469.543	573.852	652.038	757.629	844.177	903.991	965.759
168	-2.98894	44.9237	97.3529	154.787	236.818	312.685	414.492	470.461	584.474	643.617	759.462	839.662	910.646	968.813
168.5	-5.00097	44.9868	94.5474	157.902	242.863	309.025	406.132	476.688	587.65	642.521	750.004	841.74	903.629	976.2
169	-3.65607	43.1579	92.7795	153.448	242.438	309.454	403.754	479.315	583.319	646.002	765.204	844.305	906.805	972.54
169.5	-3.83705	40.4745	97.2982	154.183	238.961	311.348	394.845	476.265	573.006	659.92	768.99	837.105	903.939	981.636
170	-2.98043	41.27	94.7979	154.368	240.733	316.661	401.316	476.573	575.938	670.237	766.978	851.39	895.701	973.765
170.5	-4.87039	40.6618	96.2038	156.201	237.439	316.297	403.821	472.18	577.649	658.704	765.821	845.41	904.309	973.462
171	-3.15929	38.0394	94.558	148.818	237.93	317.031	399.917	477.798	575.332	664.443	759.719	854.812	900.161	985.366
171.5	-4.622	36.4547	97.4288	152.299	248.43	314.165	404.13	469.194	574.602	666.887	763.566	845.598	904.497	987.504
172	-2.17847	34.8088	95.5388	154.499	247.272	310.199	409.015	478.351	565.876	659.687	767.292	845.356	894.001	973.774
172.5	-1.9322	33.8344	92.7943	154.257	239.828	304.403	404.013	467.855	558.798	642.294	758.749	842.367	890.158	962.24
173	-0.77041	37.5597	99.4493	153.649	241.295	309.349	405.296	482.323	571.861	642.052	750.45	830.04	892.235	966.881
173.5	-2.17209	36.9515	97.0711	159.632	239.527	308.68	400.599	474.39	566.92	651.27	760.95	841.273	893.946	966.395
174	0.27144	36.2822	98.2939	152.127	240.994	314.541	406.827	494.29	568.57	652.798	746.609	839.444	888.699	976.773
174.5	2.65394	39.9464	96.8312	153.533	242.461	317.412	398.406	485.625	568.145	650.969	751.921	843.474	895.232	981.108
175	1.25226	40.1927	96.8943	162.568	242.036	313.813	399.018	491.731	576.264	653.84	751.496	841.523	897.981	979.585
175.5	-0.02735	38.9741	95.5537	159.763	247.287	314.792	399.265	492.282	576.083	651.34	752.353	842.197	888.339	990.329
176	0.7072	37.8776	96.8376	160.192	242.895	318.822	394.567	499.67	585.302	646.276	756.75	853.796	890.111	977.697
176.5	-1.2438	40.5653	99.4642	165.077	239.357	316.627	395.363	501.808	576.393	653.969	751.014	854.53	893.471	966.224
177	-1.54685	39.4077	97.8184	163.187	235.941	311.502	397.928	503.397	577.433	654.703	745.89	853.006	890.421	972.635
177.5	-1.78887	39.4099	95.5012	168.743	228.558	320.904	403.301	501.324	586.895	664.288	753.582	857.952	877.117	972.576
178	-2.33606	41.3041	93.245	164.229	233.687	315.047	409.712	500.227	586.409	661.299	762.068	849.532	876.753	975.203
178.5	-1.60151	40.6348	92.0875	164.658	231.614	314.377	405.686	494.614	580.979	651.047	751.511	849.351	867.783	976.182
179	-0.68385	44.9704	100.268	166.919	230.578	311.694	406.238	483.386	581.042	658.191	735.949	839.038	872.18	972.766
179.5	-0.43759	45.5829	93.6176	160.024	230.397	320.974	414.601	488.698	583.12	663.564	740.468	849.477	884.755	962.88
180	1.63974	47.233	94.2301	160.88	232.047	321.098	411.552	482.658	581.474	665.58	747.794	854.301	887.931	958.793
180.5	1.76393	45.8313	95.9412	165.216	231.927	317.682	412.653	497.675	584.528	666.193	738.153	852.411	894.891	952.081
181	1.88813	45.5283	96.0654	159.847	235.653	314.998	415.951	495.907	597.469	665.523	738.765	852.962	881.222	952.266
181.5	-0.06287	44.92	97.6544	155.516	233.946	312.437	411.802	488.585	596.983	666.38	747.557	863.34	885.435	939.573
182	0.97686	44.4339	97.2293	155.518	234.009	313.66	408.875	493.347	607.178	663.941	747.193	860.779	894.654	943.054
182.5	0.42967	44.0698	102.053	156.741	233.096	301.516	407.595	498.538	601.687	663.393	743.044	864.81	882.021	937.197
183	0.55386	41.3254	104.802	150.151	233.708	303.899	406.255	488.774	599.065	664.25	736.76	858.647	888.31	951.726
183.5	1.10531	44.9286	101.325	150.153	237.617	298.346	411.445	491.584	598.029	663.703	736.335	854.621	885.077	960.212
184	1.2295	42.8555	99.6182	156.259	237.13	300.363	405.404	485.666	597.543	661.325	741.586	856.454	879.037	954.782
184.5	-0.23321	44.0783	96.9958	158.946	237.01	302.806	414.928	483.531	598.4	667.858	754.894	862.865	880.809	950.45
185	3.24792	45.5453	94.1293	162.428	237.074	299.268	413.099	477.491	598.951	662.428	754.957	855.97	889.906	961.011
185.5	0.62553	45.2422	96.5118	161.026	233.414	301.041	415.054	486.771	596.695	667.19	755.936	857.864	877.457	954.91
186	2.03147	45.4275	92.6076	165.545	227.251	297.442	421.77	483.599	580.034	670	756.304	860.857	871.477	960.894
186.5	1.11807	45.2465	94.4408	157.429	232.624	307.392	421.162	481.892	579.792	674.397	763.325	852.253	870.503	946.431
187	-0.955	43.6617	96.5792	158.835	236.289	301.413	413.107	477.072	580.344	675.986	758.688	855.795	871.542	941.916
187.5	-1.44116	44.4573	96.154	154.565	226.647	298.608	410.302	482.201	568.078	671.899	746.911	852.258	876.244	959.008
188	0.88031	45.6801	93.9589	153.834	226.161	290.004	401.027	468.532	573.207	667.628	746.303	844.691	881.984	967.067
188.5	0.33312	48.1847	99.6373	153.775	235.074	295.987	401.517	470.365	569.73	683.866	748.746	844.938	891.996	969.876
189	0.27421	45.3182	101.898	151.153	232.574	299.591	402.008	475.616	556.854	673.736	742.279	838.043	894.439	962.676
189.5	0.33737	43.3672	93.9043	153.414	223.726	298.067	395.845	478.121	560.396	671.602	742.525	840.12	886.995	962.618
190	-0.02671	44.4679	94.2726	154.575	227.268	294.102	384.861	478.428	569.248	668.857	748.814	836.155	900.791	961.521
190.5	0.28059	44.1649	90.4295	153.662	227.087	297.461	383.642	477.026	555.151	659.704	760.107	826.941	915.442	955.42
191	0.46582	43.4346	94.582	156.228	235.451	304.299	388.771	477.944	551.064	657.875	766.091	831.337	909.157	959.694
191.5	1.38347	42.277	97.2697	152.751	233.256	298.075	393.046	489.115	557.292	658.366	759.806	825.48	910.685	954.692
192	0.28697	40.204	97.3329	152.081	231.122	310.223	392.499	491.986	566.937	656.354	752.179	827.374	920.209	958.661
192.5	-0.32126	43.3799	97.8233	151.717	233.199	300.521	389.876	500.472	571.883	657.394	757.125	830.794	910.873	954.757
193	0.53536	44.8469	97.0319	153.184	231.737	305.772	393.785	500.718	570.665	668.016	750.657	839.525	911.729	935.106
193.5	-1.3546	44.6659	98.1327	155.078	237.232	305.347	387.134	496.814	577.137	663.99	742.176	834.217	910.144	927.478
194	-2.81732	43.3863	101.553	157.461	235.891	304.067	376.882	503.774	580.984	667.227	745.657	823.049	912.222	926.809
194.5	-3.54761	43.0832	98.4421	154.045	236.137	306.45	374.382	502.617	569.023	661.308	736.687	821.709	911.858	924.126
195	-0.98201	46.2592	100.153	161.555	232.6	298.273	373.774	502.741	570.002	671.32	741.389	820.551	898.493	931.391
195.5	-1.7123	47.5431	97.3478	161.252	227.902	302.975	370.785	500.241	585.141	679.928	741.208	813.473	887.631	934.384
196	-0.12326	44.9207	99.5471	158.385	230.895	301.024	377.013	506.591	579.467	673.339	744.994	812.316	874.449	943.969
196.5	-1.46391	44.5566	99.4882	163.575	227.052	304.872	382.203	496.278	563.538	670.106	743.592	817.567	885.865	939.637
197	-0.85143	44.4367	98.2086	165.347	227.176	316.043	386.844	496.341	569.278	662.723	745.242	830.936	879.459	939.639
197.5	-1.09345	42.7298	100.408	158.391	229.558	306.219	388.067	484.746	571.294	661.87	750.127	825.872	890.386	940.862
198	-0.17579	44.624	98.2129	163.643	233.528	307.808	385.322	482.429	574.165	648.018	757.454	814.033	891.182	948.494
198.5	0.49772	47.0675	101.999	167.124	233.408	307.749	378.794	487.802	564.157	655.649	761.362	801.95	897.104	957.956
199	0.0726	45.2996	104.26	163.159	234.203	308.788	386.059	477.245	571.484	645.825	753.918	810.864	893.81	956.371
199.5	-0.90183	42.0059	103.285	158.4	242.445	315.443	390.761	483.29	570.021	642.775	762.038	813.307	881.727	941.969
200	-1.38799	41.8859	102.128	162.43	241.593	313.187	391.617	480.118	562.699	650.406	747.147	800.553	875.626	944.535
200.5	-2.48449	43.1698	98.5287	160.907	246.173	310.321	384.539	469.683	566.302	651.568	756.366	812.396	870.684	935.565
201	-0.59028	43.9654	100.057	160.787	239.705	306.966	394.49	471.272	578.206	640.767	736.714	811.36	867.085	941.304
201.5	-3.94508	42.9909	99.7536	162.132	242.454	304.343	394.981	471.702	582.053	646.323	733.604	817.161	881.675	938.743
202	-3.27157	43.0541	98.6571	160.059	250.391	309.9	404.932	469.69	586.45	634.912	732.69	818.445	877.527	941.675
202.5	-3.39152	40.981	95.6685	160.549	240.017	304.897	406.765	469.936	588.711	636.623	739.895	817.898	877.956	946.438
203	-2.65697	42.3259	96.22	160.185	235.319	299.955	410.368	474.638	578.031	638.151	734.342	824.552	872.587	944.914
203.5	-3.57037	41.9008	99.2128	154.45	236.176	299.774	408.295	481.232	577.545	643.646	735.077	825.897	873.627	942.597
204	-0.76062	42.5743	99.8863	157.259	236.239	304.842	400.973	486.239	590.182	650.179	741.305	815.951	878.268	937.411
204.5	-1.91816	41.1727	103.001	154.637	233.678	306.798	392.552	492.283	580.235	641.575	740.086	830.113	872.594	943.699
205	-2.40432	40.0151	100.379	156.714	231.727	311.927	392.127	487.464	577.735	636.756	750.098	829.688	871.497	929.358
205.5	-4.23324	38.9186	107.827	157.571	226.052	305.337	399.27	493.936	570.352	636.148	738.626	824.319	861.306	935.769
206	-2.09489	37.8831	104.289	158.977	231.365	311.138	401.042	496.562	571.758	638.408	739.787	820.476	864.299	940.715
206.5	-1.78759	39.4111	103.864	157.575	223.554	305.891	401.044	495.222	567.914	650.922	723.554	813.154	866.498	938.337
207	-0.19855	41.3054	103.378	154.831	220.871	306.686	393.6	500.534	575.485	661.239	724.35	815.048	861.801	937.485
207.5	-0.31849	40.0868	103.746	155.809	231.981	307.665	397.203	508.654	592.028	656.603	713.121	813.28	874.498	943.651
208	0.78227	40.5162	105.519	155.873	232.289	314.32	397.145	502.43	597.34	654.164	723.927	818.165	863.575	938.343
208.5	3.59201	41.0066	100.882	158.988	230.643	306.876	397.391	504.141	600.699	668.448	729.361	825.247	864.249	938.59
209	3.89932	42.7787	104.058	156.548	233.453	302.239	385.918	499.261	591.363	657.403	731.744	807.366	869.195	929.681
209.5	1.03279	42.5367	105.037	159.114	238.215	308.101	375.972	497.676	588.069	665.706	740.718	810.054	868.77	919.185
210	-0.30786	44.553	104.795	160.825	236.509	300.962	373.105	502.805	596.677	673.642	735.776	809.323	874.875	931.028
210.5	-0.36677	45.7148	105.59	158.935	234.008	306.823	381.896	507.446	594.848	675.964	739.99	815.856	880.187	926.696
211	-1.95155	46.6935	107.423	157.167	232.24	308.046	383.546	496.95	587.343	670.534	726.747	805.788	881.837	933.168
211.5	-0.24044	43.7049	100.284	155.582	231.754	301.517	380.314	495.609	589.298	669.376	728.824	796.024	876.652	934.33
212	-1.03177	41.937	103.094	162.481	227.728	299.017	377.569	487.921	578.192	668.219	732.061	798.04	867.193	935.431
212.5	0.98451	41.1457	101.693	161.934	224.19	309.7	375.923	486.336	588.082	664.742	737.313	802.986	866.158	930.428
213	-2.00408	42.4905	93.0276	159.312	223.277	306.59	381.358	480.723	596.812	664.561	731.211	807.017	857.371	939.097
213.5	0.31738	45.1782	93.0908	158.887	227.856	301.526	378.308	484.265	590.832	655.469	745.068	810.254	861.523	931.47
214	0.68572	44.7531	95.2902	163.039	221.816	300.735	381.911	473.464	596.389	665.786	743.361	823.073	861.159	940.993
214.5	-0.9601	42.4969	92.5457	158.586	222.612	300.859	381.425	480.729	588.884	644.67	748.185	816.423	865.434	943.01
215	0.68997	46.3443	91.4492	158.649	229.328	301.166	378.864	473.895	575.092	637.042	738.971	806.415	868.061	933.063
215.5	0.99728	45.5529	93.0383	158.468	227.377	298.116	373.556	472.677	566.732	639.303	743.185	814.108	862.447	933.553
216	2.64735	43.2968	96.0311	156.395	220.604	306.602	389.61	473.9	570.457	646.873	731.651	824.18	855.614	925.499
216.5	3.50397	41.2237	95.0567	152.247	226.404	300.379	385.645	471.644	564.539	651.697	737.208	828.394	854.212	921.534
217	0.75951	41.8362	90.6643	155.728	232.51	309.536	380.947	467.8	566.25	658.535	736.782	836.636	860.134	919.278
217.5	1.5551	41.2279	93.9623	158.354	233.428	306.243	379.18	483.061	564.971	661.894	745.757	829.436	881.56	929.473
218	2.96103	41.169	96.589	151.46	232.758	312.287	384.736	478.791	567.048	663.239	737.519	819.672	875.092	933.991
218.5	4.67214	43.0633	99.0935	148.227	231.418	307.162	386.386	482.028	571.139	657.016	734.714	816.073	869.235	935.275
219	1.13423	43.0654	94.1518	152.746	230.687	298.681	395.421	490.88	571.508	645.787	734.105	808.934	870.214	939.428
219.5	3.69984	42.5182	95.6188	156.471	229.53	306.922	393.226	478.981	560.401	651.588	737.892	814.674	877.052	944.801
220	3.27472	44.2903	95.0105	152.994	230.997	309.427	394.876	490.823	559.549	651.834	742.349	803.751	867.899	940.836
220.5	1.93407	45.4521	90.1909	159.954	229.9	310.467	401.409	491.924	568.584	649.09	735.21	816.143	871.746	941.265
221	1.26481	46.736	91.5968	163.313	233.565	308.455	399.031	496.077	566.633	657.942	730.635	812.422	865.217	937.422
221.5	-0.99136	46.1888	94.0404	163.071	228.074	303.33	397.263	486.802	562.485	657.456	726.67	806.199	875.901	935.288
222	-0.80613	45.8858	94.1035	158.313	235.461	303.82	403.43	489.733	558.764	656.542	729.54	815.661	869.311	935.29
222.5	-1.90264	47.1696	93.5563	160.207	230.519	305.043	409.841	498.525	559.865	665.822	728.871	820.058	867.055	936.696
223	-2.51086	46.1342	92.0326	164.848	229.301	308.585	405.082	490.653	546.256	665.458	729.423	827.384	860.831	932.731
223.5	-0.0063	47.2959	94.9644	165.155	236.261	307.428	391.778	493.829	537.958	664.483	728.937	825.372	855.279	920.099
224	-0.61452	47.0539	95.0276	162.288	236.751	292.354	387.325	487.3	538.448	660.518	726.68	818.538	864.009	917.965
224.5	-2.0162	44.9809	97.1049	162.718	242.246	291.319	382.627	495.725	539.793	656.553	735.472	824.034	870.054	925.84
225	-4.51651	47.3634	98.3277	158.997	240.906	286.438	396.362	489.99	548.218	664.49	735.23	831.36	878.601	910.461
225.5	-6.22337	45.9617	94.9119	161.684	237.246	287.844	385.317	479.861	556.826	647.463	729.616	810.732	879.641	917.177
226	-6.52642	46.5742	93.8154	162.785	238.774	298.283	379.277	493.657	573.552	655.827	732.304	819.89	869.755	914.982
226.5	-2.49598	50.2994	92.2916	169.318	243.415	306.83	376.288	496.466	563.727	662.177	726.264	817.511	866.645	920.233
227	-3.77559	47.2498	92.0496	164.376	235.299	307.382	374.764	485.726	568.307	655.221	725.9	824.777	867.928	927.316
227.5	-1.5762	47.7402	90.2207	164.623	227.55	307.018	386.363	474.742	567.699	653.392	726.817	824.657	874.706	925.304
228	-0.4144	45.484	89.8566	158.643	224.805	304.334	392.835	475.416	574.72	662.672	723.096	818.372	872.51	921.155
228.5	-0.16813	48.66	95.7791	160.965	227.798	314.163	391.922	472.549	562.271	659.073	717.788	815.323	868.667	924.82
232	-1.38671	49.4556	97.1851	158.831	229.143	311.968	386.553	476.641	560.259	654.985	720.11	816.667	867.632	920.122
232.5	-0.34699	46.8332	98.9572	163.471	231.159	301.838	387.776	469.441	565.51	654.865	726.276	823.078	876.789	915.974
233	-2.11488	45.8588	98.6542	159.018	227.255	298.422	374.838	468.954	559.164	654.562	728.72	816.183	861.044	923.788
233.5	-0.34273	43.9078	101.708	163.415	232.384	295.861	383.385	465.355	565.209	660.912	734.887	826.134	854.333	923.363
234	-0.09647	44.7644	97.3156	161.769	225.612	297.694	385.463	464.869	569.178	668.666	730.067	815.944	865.321	914.332
234.5	-0.52158	44.2172	101.346	159.024	231.656	297.574	382.535	455.533	563.199	677.579	729.459	808.011	865.018	910.001
235	1.37263	44.7076	97.6861	162.994	229.949	292.327	387.603	461.089	559.905	670.379	728.118	810.21	859.588	911.529
235.5	2.6565	48.8601	92.8054	166.78	227.144	297.09	383.455	470.43	563.814	661.409	724.214	808.382	862.703	903.413
236	2.59759	43.5522	95.31	167.209	231.113	303.196	394.138	467.014	574.68	657.993	718.357	803.806	860.691	911.655
236.5	1.98936	43.8595	91.4059	160.07	227.88	290.197	395.788	474.34	581.64	661.413	707.678	808.63	863.256	916.662
237	2.11356	43.2513	98.6101	166.359	234.963	298.073	389.504	472.267	582.07	665.138	702.797	808.632	856.728	915.871
237.5	2.4819	44.5351	99.4668	169.718	234.599	297.343	391.886	472.697	583.109	655.802	716.288	808.878	861.796	916.178
238	2.48402	46.0021	102.032	168.805	229.84	302.289	387.067	469.342	574.628	650.738	703.839	809.247	863.568	914.593
238.5	3.15754	46.6756	104.049	167.464	230.636	294.112	390.426	476.851	576.094	659.53	698.836	800.094	859.969	917.464
239	0.77929	45.6401	104.173	165.33	232.53	295.945	393.968	485.52	573.289	657.945	721.238	807.176	858.872	911.302
239.5	-0.9886	48.4499	102.466	166.065	237.293	291.98	391.59	480.274	563.281	656.36	719.348	823.291	857.532	914.111
240	0.29527	45.034	100.027	168.63	243.154	288.931	389.394	472.341	574.453	651.662	726.369	806.509	859.365	908.071
240.5	-0.12985	45.2803	102.714	168.144	237.663	282.158	379.814	475.395	569.328	652.824	723.381	806.267	852.592	905.998
241	-1.04325	45.3435	98.0778	166.193	235.956	284.967	380.243	471.43	567.194	644.403	717.524	809.259	844.355	912.531
241.5	2.07167	43.2704	93.5633	167.355	238.156	287.045	383.419	478.939	578.915	643.368	721.371	811.825	848.812	923.336
242	2.56207	43.3946	97.5938	162.23	236.876	283.141	386.9	480.101	584.349	652.647	717.711	811.522	861.205	922.362
242.5	0.489	44.8005	96.6804	166.016	225.22	288.331	379.822	479.188	589.234	646.058	721.192	820.313	856.812	918.03
243	-0.6075	44.2533	94.1191	167.483	227.908	298.282	384.707	484.378	595.767	643.68	724.368	814.029	852.542	929.751
243.5	-0.66641	44.4386	97.7223	160.466	231.878	295.171	380.925	486.516	599.492	648.259	711.797	803.35	847.844	932.012
244	-0.78635	47.6145	94.2454	159.492	228.095	294.99	386.054	496.589	598.823	645.271	716.499	794.929	849.555	931.343
244.5	-2.18804	47.3115	97.1772	162.363	227.365	303.842	388.62	496.774	589.914	641.611	722.726	793.1	855.966	921.518
245	-1.69763	47.7409	100.17	159.313	221.63	301.83	396.374	496.044	579.662	649.608	721.264	804.943	857.311	922.802
245.5	0.25762	43.1043	100.233	158.888	222.487	296.461	400.587	491.102	578.016	650.953	723.097	804.579	853.346	912.794
246	0.13768	44.2661	99.1367	152.42	224.015	302.14	406.571	494.767	575.333	645.462	729.203	803.482	856.156	912.552
246.5	2.27604	44.5734	101.275	151.873	212.237	309.588	411.334	495.44	573.138	643.328	728.045	807.635	851.641	915.85
247	1.97299	43.1107	99.0189	150.716	212.971	309.041	395.589	486.653	586.018	645.65	720.723	807.393	843.098	915.73
247.5	3.43996	42.8687	100.791	150.291	217.856	310.935	391.624	486.289	583.091	638.938	724.875	808.188	833.274	918.723
248	0.32929	41.528	98.4738	149.56	217.065	314.538	393.457	489.038	582.055	630.029	731.164	814.843	828.088	913.964
248.5	0.94177	44.6429	100.124	153.835	216.091	307.704	393.215	481.288	574.794	634.487	736.965	822.048	836.574	905.239
249	3.14116	44.9502	100.187	158.293	209.928	310.087	385.099	480.131	574.308	631.925	744.535	818.449	846.159	899.748
249.5	1.00706	46.7834	100.189	155.487	219.147	305.023	376.19	474.335	573.212	645.599	754.608	810.394	847.198	896.393
250	2.10782	44.8324	101.717	155.611	217.989	308.687	382.174	472.628	574.312	640.597	746.554	815.767	838.534	909.212
250.5	2.10995	48.4967	99.0338	160.191	220.799	309.544	392.247	479.1	571.751	636.204	730.87	806.065	840.977	898.289
251	2.05104	47.8884	96.7166	157.935	222.693	303.137	396.704	466.773	570.777	644.629	721.472	808.936	834.693	912.024
251.5	-0.87652	48.3178	97.1459	157.815	230.325	311.074	383.401	473.245	557.9	648.415	739.236	816.14	834.145	903.176
252	-0.32508	42.6437	95.1339	156.84	229.228	307.109	377.177	474.345	562.175	643.474	733.256	807.902	851.359	902.324
252.5	-2.21504	44.9651	93.6712	153.669	223.798	305.524	382.306	468.976	564.679	654.767	724.469	813.093	847.516	913.129
253	-2.94534	41.7324	96.7861	158.249	225.265	297.409	377.243	464.096	566.635	652.084	718.551	817.367	850.57	899.093
253.5	-1.78354	43.4435	97.4596	156.481	220.873	297.35	374.986	463.487	566.881	651.048	715.929	810.228	840.135	891.283
254	-1.47624	41.3704	102.589	153.126	227.711	298.878	376.148	468.189	569.508	654.285	724.171	809.864	840.26	892.628
254.5	-2.02343	45.0957	99.8442	148.001	227.591	300.345	385.611	470.206	573.294	655.02	727.041	818.716	844.412	903.616
255	0.17596	44.9758	96.3674	151.421	223.809	296.99	390.557	467.644	570.488	652.092	732.903	816.887	851.799	904.29
255.5	-1.04262	44.6727	97.224	153.01	225.825	293.086	385.798	463.618	571.162	654.292	730.097	814.326	857.356	908.015
256	-1.34566	45.3462	95.5782	152.341	227.048	304.379	393.613	467.709	572.69	643.063	723.142	819.516	858.029	901.914
256.5	0.06027	43.5783	93.6272	158.813	216.369	300.048	393.249	465.026	572.814	641.051	718.139	812.133	856.994	894.469
257	-0.36485	41.8715	96.1928	164.43	210.451	297.914	404.725	464.601	569.337	641.176	728.639	814.088	849.611	890.992
257.5	2.07868	37.9063	99.0025	160.77	213.26	291.324	393.009	465.458	567.508	642.948	722.477	813.785	855.228	898.319
258	0.73804	42.364	102.362	168.096	218.023	296.575	398.626	467.23	565.496	642.279	720.526	817.266	864.813	886.48
258.5	1.8388	41.9389	103.767	173.836	215.096	289.314	398.506	470.1	574.043	638.863	717.842	816.17	857.796	900.459
259	-1.21083	45.2369	96.6285	170.969	224.07	293.528	392.71	466.196	574.229	628.489	736.582	814.646	850.779	909.19
259.5	-0.53732	45.6053	94.4944	163.037	221.631	293.347	393.811	468.579	565.808	643.933	736.096	808.178	854.138	904.858
260	-1.32865	42.1894	98.83	158.767	226.699	291.701	397.292	465.651	560.805	641.249	729.018	809.645	859.999	912.917
260.5	0.13832	40.5436	99.5646	160.172	226.151	292.68	395.951	471.086	564.836	637.895	726.212	810.014	846.452	921.647
261	-1.14129	39.7523	95.1722	161.456	228.229	291.339	397.907	466.266	556.598	646.869	717.853	821.002	852.985	914.63
261.5	0.50878	39.022	95.4184	162.252	231.527	282.857	398.275	472.188	565.877	652.852	722.31	822.896	851.278	911.031
262	1.85368	40.3669	95.2375	160.301	232.139	292.564	387.169	467.125	566.429	656.578	722.313	825.096	858.97	912.376
262.5	1.12339	40.4911	98.4745	161.768	227.503	296.411	381.311	465.967	569.544	647.73	736.841	825.037	842.554	915.552
263	0.33206	42.3242	98.1104	158.718	224.941	297.756	389.919	471.829	568.447	647.305	731.655	826.26	847.561	918.423
263.5	-1.13066	42.2653	95.427	161.04	226.225	294.279	408.842	473.235	567.29	640.654	731.535	828.215	844.389	919.463
264	-2.41027	43.8544	93.2929	161.469	221.711	293.854	413.788	479.645	560.578	650.422	721.528	821.381	842.255	902.253
264.5	-1.00433	41.7813	93.6001	161.471	217.807	288.241	403.537	477.877	571.2	644.442	730.197	820.102	848.056	905.246
265	-2.8943	42.0886	92.6257	156.896	223.424	293.92	403.722	467.87	574.132	646.947	735.509	819.676	848.851	896.764
265.5	0.5258	41.9076	97.2665	162.696	221.534	303.504	402.259	467.078	578.529	661.903	722.816	827.491	849.952	893.409
266	0.40585	42.5812	95.9259	155.74	225.87	301.736	409.586	471.963	572.427	656.839	723.672	807.23	850.931	896.463
266.5	-0.93479	44.2312	92.6931	155.193	229.778	293.194	402.385	465.435	567.18	660.747	721.721	805.217	865.276	894.634
267	-0.01714	43.0127	93.916	152.327	232.832	291.975	407.82	459.944	567.854	676.863	723.31	800.093	859.785	892.622
267.5	1.87708	43.9913	93.6739	150.803	228.684	286.789	402.451	444.748	563.767	669.052	706.528	796.189	865.463	881.088
268	1.39092	47.6556	91.6009	151.72	231.799	289.66	410.571	470.385	566.698	667.101	713.732	798.998	853.075	874.133
268.5	1.57616	48.0239	92.9458	144.398	227.589	293.873	397.023	457.448	554.188	651.845	720.204	799.977	853.688	889.088
269	1.70035	48.8805	98.8073	150.077	223.929	287.589	391.105	458.182	546.378	656.974	728.019	793.937	859.61	888.175
269.5	0.23764	47.1126	95.3914	153.436	225.152	296.746	396.783	456.292	540.277	658.136	724.054	799.859	844.659	888.543
270	0.4839	43.3306	97.7739	157.405	228.755	297.847	392.513	473.201	533.626	652.339	728.267	795.65	856.258	891.475
270.5	-0.12432	42.2951	98.2033	154.234	228.452	293.699	402.647	475.278	539.06	647.886	724.241	818.662	843.015	907.407
271	-0.61048	43.3959	100.952	154.297	235.412	300.171	397.095	472.961	548.767	645.569	725.403	808.044	852.661	898.681
271.5	-0.42524	45.2291	102.053	154.36	233.584	301.21	395.205	471.682	553.408	652.529	710.207	794.069	841.86	907.351
272	0.00413	45.4143	101.322	157.231	230.595	308.049	399.601	482.853	557.499	657.963	706.12	801.152	836.918	908.757
272.5	0.37247	44.1957	96.2587	150.702	220.892	311.408	393.927	479.743	557.99	658.698	699.713	796.637	841.925	914.679
273	1.04598	48.7755	100.289	152.291	224.679	308.846	392.709	475.411	560.372	659.127	707.04	789.132	841.927	923.409
273.5	-2.00365	45.1765	103.282	147.227	220.897	307.384	390.758	480.479	566.173	666.697	718.272	785.228	849.376	917.125
274	-0.78082	43.1645	99.0727	143.628	219.922	305.249	391.431	476.819	548.169	670.179	717.847	782.849	852.124	920.362
274.5	-0.65662	44.0821	101.272	154.373	214.309	306.716	395.462	486.221	555.801	657.485	724.746	781.875	848.464	912.612
275	-0.8376	44.4505	103.044	156.755	221.819	305.437	392.046	479.631	557.573	651.018	722.978	791.155	848.528	915.117
275.5	0.44626	43.0488	100.605	153.828	217.792	314.045	389.362	481.525	552.509	653.034	726.581	783.527	849.14	906.147
276	-0.46714	45.5534	100.912	154.074	221.09	310.446	386.313	479.086	553.122	660.91	714.377	784.872	854.513	911.764
276.5	0.51155	44.762	101.586	159.02	207.604	310.204	389.611	482.933	549.828	653.954	712.731	787.194	848.839	908.226
277	1.18506	48.1211	100.794	155.665	221.461	297.267	389.857	477.992	540.064	643.946	716.212	786.768	844.447	911.036
277.5	-1.43732	46.7805	102.506	150.174	221.829	302.701	380.032	473.111	546.414	658.719	716.946	784.512	844.327	915.677
278	-1.92348	45.9891	95.8548	149.749	223.174	304.717	376.678	476.104	541.106	660.674	710.845	788.97	835.357	909.209
278.5	-0.33444	46.6626	98.6035	149.568	219.331	304.78	375.947	482.27	539.705	655.854	714.509	789.094	843.66	911.897
279	1.13253	46.9699	100.071	149.997	224.948	308.017	382.968	480.869	533.725	661.96	696.445	772.434	845.371	899.997
279.5	0.64638	48.681	103.369	153.967	224.157	305.517	386.389	464.147	548.803	670.08	698.705	793.554	848.547	901.952
280	-0.32806	47.2183	101.54	152.87	230.019	307.411	383.644	465.553	557.533	659.828	709.633	800.27	860.756	897.926
280.5	-1.42456	46.0608	103.739	149.454	227.03	305.094	389.261	484.476	567.484	658.549	710.795	798.685	868.937	896.891
281	-0.69001	47.0395	105.572	152.874	230.145	303.326	386.578	497.113	552.533	659.344	712.262	806.256	858.38	904.095
281.5	1.38731	48.5675	101.546	156.233	230.941	300.46	387.313	496.871	556.746	659.835	717.94	800.215	868.025	893.294
282	-0.99094	49.241	99.595	152.512	220.567	300.401	384.446	496.995	560.96	662.278	710.862	801.743	869.431	904.038
282.5	-0.56156	47.8393	101.55	155.688	227.893	310.718	386.157	501.758	573.962	653.43	714.221	798.389	866.931	909.167
283	1.63783	45.8883	100.271	161.306	228.994	306.142	390.249	504.873	570.73	667.226	710.5	801.992	861.196	899.282
283.5	0.11408	46.6229	97.7093	161.064	226.371	304.313	388.481	493.644	557.487	666.008	713.92	797.111	855.339	918.205
284	1.94726	48.5781	100.885	158.808	227.777	305.353	382.746	492.426	558.283	650.385	701.532	794.611	857.294	915.399
284.5	1.58317	47.6647	101.742	160.58	222.408	311.215	384.701	501.461	550.655	646.42	710.506	788.204	849.545	912.716
285	1.28013	45.7137	93.8705	168.028	219.481	304.808	384.398	499.998	564.39	641.295	713.499	779.6	849.791	908.324
285.5	1.58743	45.6548	97.8399	171.692	220.704	295.716	391.968	482.3	575.074	636.78	713.746	779.48	846.375	909.668
286	3.2375	46.5725	97.5978	164.492	222.171	305.545	388.736	482.424	575.442	638.43	712.771	779.238	841.677	907.656
286.5	1.83582	46.2084	98.9428	164.067	220.22	302.739	390.325	476.14	563.97	640.386	706.426	779.485	841.13	908.025
287	2.20416	46.8209	96.6255	160.102	219.184	298.652	390.022	490.18	550.3	645.942	699.287	786.811	831.55	898.811
287.5	3.85424	40.4143	99.0691	159.067	221.872	301.34	388.376	480.661	549.936	633.92	711.374	784.311	829.904	893.564
288	2.94083	41.6371	100.597	158.458	220.348	292.98	385.936	481.273	540.722	640.819	722.973	798.412	839.794	899.791
288.5	3.004	40.8458	94.9229	158.277	221.144	290.235	393.629	480.726	548.536	636	721.083	810.377	848.524	903.456
289	0.93093	41.7634	98.4651	154.984	220.352	303.299	381.485	477.86	553.055	632.889	717.972	800.308	837.296	902.969
289.5	-0.40972	41.1552	93.9506	157.122	220.049	290.545	388.811	484.576	551.531	646.197	721.087	804.4	842.425	891.741
290	-0.52966	37.3121	92.61	153.035	222.31	296.345	381.062	488.972	545.491	643.269	722.004	805.623	853.596	882.893
290.5	-1.62617	37.9246	92.368	158.774	215.293	289.878	378.562	486.411	548.911	641.806	717.917	807.7	850.669	897.422
291	-0.89162	39.9409	95.2387	159.692	217.919	287.744	372.644	486.108	544.518	650.476	718.469	803.674	862.634	894.189
291.5	0.69742	42.3844	91.5177	159.206	224.941	290.126	376.186	489.528	551.967	636.745	715.785	796.718	875.148	904.384
292	0.45541	39.2127	96.1585	154.081	222.806	297.086	380.338	493.375	560.636	636.503	713.468	801.786	864.713	894.437
292.5	1.80031	40.6797	93.231	154.571	225.006	286.163	384.491	491.302	556.427	631.439	703.155	793.976	880.279	891.571
293	1.7414	44.2829	91.6462	157.137	225.13	286.592	388.399	478.67	567.781	624.788	715.853	789.095	870.027	900.728
293.5	1.62146	43.1254	93.9066	159.153	224.644	284.947	390.415	481.48	568.76	627.293	718.418	779.27	866.123	905.918
294	3.69878	39.9537	93.9698	158.118	223.608	285.803	386.939	478.003	572.058	642.859	718.604	786.841	863.379	904.211
294.5	3.02952	40.1999	93.6667	156.838	224.831	282.021	385.476	470.681	571.877	639.565	710.793	789.712	851.418	906.96
295	2.54336	40.9345	99.4672	153.483	223.552	281.474	384.99	471.66	570.842	625.529	717.509	795.817	860.148	895.671
295.5	1.08065	41.0587	97.272	149.884	222.882	278.791	390.302	472.76	574.628	630.719	716.474	790.875	858.319	887.982
296	0.59449	42.6477	95.8093	153.976	222.64	280.441	382.003	465.743	565.17	636.276	708.663	783.675	864.181	895.553
296.5	-1.78375	43.1992	99.3515	146.898	221.727	284.41	372.057	471.422	568.651	635.118	711.839	792.589	854.112	897.081
297	0.3546	44.2999	96.6681	151.539	218.616	277.881	379.627	468.982	564.991	624.195	705.372	797.291	866.016	903.187
297.5	-2.08468	46.1941	98.013	153.616	222.83	288.504	382.315	466.604	562.185	640.738	717.031	793.631	861.502	897.451
298	-2.20462	46.2573	91.4233	159.172	223.198	285.332	375.42	475.823	556.633	639.336	708.489	801.262	857.292	890.251
298.5	0.11684	49.1281	92.2799	162.104	224.604	283.869	383.723	468.134	551.386	648.371	711.604	796.259	857.356	889.704
299	-0.79656	49.1302	94.4793	164.059	219.662	289.853	379.636	469.968	547.36	649.228	699.765	798.764	856.747	896.725
299.5	-1.89306	47.4844	94.7866	167.846	227.111	288.817	398.62	473.082	545.653	637.084	692.687	792.724	858.336	888.06
300	-0.6092	44.3127	92.5915	161.622	229.676	286.317	388.246	474.427	542.054	650.697	702.76	792.115	857.545	887.452
300.5	0.12535	42.3617	96.0726	161.991	224.918	286.685	393.497	466.068	542.484	656.558	705.509	786.197	852.847	882.144
301	1.16507	40.4717	95.3423	159.979	226.629	287.969	384.588	475.713	546.636	654.668	714.178	785.894	843.938	884.527
301.5	-1.0911	42.0608	94.612	159.675	227.669	282.112	386.787	484.749	556.831	640.694	720.65	780.952	840.401	891.487
302	-0.60069	43.4057	98.3373	157.847	230.539	286.631	385.141	471.018	546.763	639.231	716.806	782.053	841.257	892.771
302.5	-2.30755	42.4312	98.5836	157.849	231.762	290.905	392.59	468.09	555.737	634.167	715.222	792.919	839.306	897.167
303	-3.77026	46.7668	99.3791	153.456	223.769	288.71	388.014	475.722	559.828	641.921	720.29	790.602	827.956	904.311
303.5	-2.91365	42.8627	96.9399	156.998	227.433	281.632	388.017	479.264	548.661	659.074	721.452	790.91	829.545	899.308
304	-0.34804	45.7945	91.2657	158.954	220.172	290.423	396.075	466.571	560.382	660.113	726.336	787.066	832.11	897.235
304.5	-1.38352	48.4822	90.4133	158.345	220.662	287.374	384.298	469.564	565.389	657.003	719.991	790.853	828.511	903.219
305	-0.71	48.3623	93.2841	163.169	225.669	286.582	383.506	471.824	579.795	663.78	705.772	784.08	825.096	903.037
305.5	-3.27135	46.8385	98.7794	158.35	217.92	278.04	375.147	472.681	579.248	664.392	717.981	797.022	820.886	903.955
306	-3.20819	46.7186	99.1478	163.052	213.894	284.206	370.449	468.716	573.757	659.145	716.213	810.207	820.339	895.168
306.5	-1.86329	48.3686	99.272	159.208	217.253	287.504	374.907	464.384	571.196	646.025	710.661	809.965	821.257	901.335
307	-3.99739	47.3942	99.091	158.6	218.72	288.788	380.951	468.293	576.264	645.172	713.959	813.996	831.025	899.994
307.5	-0.02798	45.1991	96.2245	156.588	208.102	290.988	376.315	460.482	570.223	651.278	713.168	804.965	835.604	902.072
308	0.5845	43.9195	96.4707	157.689	204.747	284.642	374.181	459.142	562.291	650.243	710.057	809.728	826.024	912.633
308.5	1.80733	43.3723	97.2053	155.86	204.566	289.283	370.399	465.98	557.41	650.306	711.89	818.58	844.764	895.972
309	-0.57092	41.7264	99.7098	153.604	212.625	290.201	375.833	470.376	560.281	654.763	705.179	814.859	845.498	890.664
309.5	0.22467	41.7286	99.2847	149.944	213.237	289.043	379.741	471.904	572.124	642.559	708.965	817.546	836.284	881.206
310	0.10472	41.9748	103.864	151.533	218.183	292.768	391.767	474.531	561.018	652.876	709.76	813.093	829.817	886.213
310.5	-0.56454	42.2211	105.331	153	215.073	290.695	382.675	481.674	558.945	654.343	712.082	819.138	828.659	889.694
311	-1.47794	43.3219	100.634	156.054	217.821	293.993	383.41	476.916	554.43	652.514	714.525	808.703	824.755	889.33
311.5	-2.45237	43.5071	97.9505	156.056	215.565	286.732	388.722	471.669	559.925	656.117	716.298	805.897	828.053	884.571
312	-1.77886	46.9272	98.9291	161.978	222.464	294.364	398.49	474.356	553.763	644.583	732.23	796.988	832.633	877.738
312.5	-0.98328	46.6242	99.4196	158.074	219.354	290.643	395.44	472.1	558.282	646.722	725.274	798.699	843.743	887.2
313	-0.43183	43.3914	100.276	159.114	228.206	285.03	391.841	476.009	561.946	652.766	726.497	795.222	835.323	884.029
313.5	-0.12453	42.539	99.851	156.736	218.137	279.416	393.674	467.466	557.798	656.003	726.743	787.046	839.902	891.05
314	-0.9769	43.6398	98.8156	162.292	220.642	285.888	390.258	464.05	553.222	654.052	717.651	793.09	841.674	897.155
314.5	-1.8903	42.1771	97.9632	163.271	222.231	279.604	389.894	462.404	543.459	651.308	717.47	793.093	839.296	896.181
315	0.61427	43.9492	99.9185	165.592	219.975	285.16	395.023	465.885	539.921	653.141	725.834	774.479	858.83	880.253
315.5	0.6164	42.5476	95.526	169.196	228.339	280.463	395.941	462.652	541.51	644.842	727.789	775.824	848.639	877.264
316	1.28991	41.8173	98.3358	162.423	230.172	280.343	395.15	454.293	547.616	645.882	718.575	785.225	848.885	890.633
316.5	2.08549	43.3453	93.272	164.012	219.737	280.711	390.879	471.629	542.063	640.147	717.112	788.401	846.507	896.312
317	1.59934	41.9436	95.4714	156.201	221.57	279.431	387.647	458.02	549.817	634.351	720.105	784.314	844.922	885.571
317.5	-0.47373	41.2743	96.8773	153.457	216.628	284.866	385.818	466.811	546.401	633.804	726.15	782.18	849.99	878.555
318	-2.05852	36.943	97.9171	153.032	227.617	286.882	384.66	454.301	547.136	632.646	720.537	781.877	859.88	890.214
318.5	-1.99535	38.8372	99.5061	161.823	226.947	284.748	394.306	455.89	544.696	629.352	725.238	774.433	860.859	892.597
319	-2.48151	36.52	100.302	157.797	220.236	289.633	403.463	450.094	556.295	621.786	732.015	782.064	851.95	885.092
319.5	-0.89247	37.8038	96.6417	158.226	217.674	293.602	397.24	463.463	550.926	628.258	730.126	797.508	846.153	885.765
320	-1.56173	37.0735	93.7141	165.43	220.972	287.806	403.345	478.968	548.06	639.063	733.424	795.557	844.447	880.946
320.5	-0.522	38.1743	98.8432	161.282	217.19	287.259	402.859	482.205	540.738	639.615	733.731	793.118	838.406	884.488
321	-1.00816	39.4582	99.1505	158.538	218.535	290.13	406.279	477.813	545.623	642.363	730.071	794.097	831.755	887.908
321.5	0.03157	39.7655	94.2698	150.361	223.054	290.681	397.981	470.491	541.474	641.389	728.486	807.344	837.556	887.177
322	0.58301	42.8193	93.5395	153.171	233.493	285.617	394.26	467.99	543.308	630.466	719.882	802.646	826.877	894.26
322.5	-3.56525	45.0187	95.6779	156.591	226.965	293.676	397.924	465.612	548.498	615.514	727.026	787.878	825.353	877.721
323	-2.58657	46.6688	97.7552	149.513	230.14	292.396	399.696	472.145	544.838	624	717.323	789.1	831.215	868.873
323.5	-2.21823	45.2671	94.2173	150.614	225.748	295.633	399.881	473.551	536.661	618.57	707.071	798.807	826.09	882.853
324	-0.93436	46.4289	87.4445	147.442	226.727	303.509	399.09	476.666	533.795	607.464	714.337	801.8	837.689	878.948
324.5	-0.07774	47.8349	89.8881	153.182	230.269	306.014	398.665	476.79	547.346	621.687	707.564	788.374	833.968	884.688
325	-1.7846	47.7149	92.2095	149.399	225.449	305.833	397.385	480.759	554.917	620.957	706.528	791.062	828.293	865.464
325.5	-1.96558	46.3743	94.6531	146.411	221.85	308.947	390.857	461.657	549.731	634.875	720.935	800.708	829.455	874.255
326	-2.75691	40.1508	92.2138	150.441	223.317	309.804	401.967	464.467	547.658	636.098	707.875	799.794	831.349	875.478
326.5	-1.16787	40.336	92.0328	150.077	224.296	309.379	408.5	472.465	551.078	625.541	715.141	798.942	830.131	872.856
327	-1.10471	39.4837	96.3684	149.774	219.354	304.681	406.915	479.242	533.99	618.158	716.119	792.963	830.743	885.858
327.5	-2.99467	38.5092	98.2626	153.744	214.962	300.106	398.739	483.822	536.312	615.536	722.713	794.796	827.266	892.025
328	-1.64977	41.1969	97.1661	155.394	214.232	288.084	397.154	477.659	546.568	610.899	726.5	793.089	834.532	886.29
328.5	-1.28143	40.7718	98.2669	156.311	207.215	286.194	396.241	470.642	552.246	610.474	727.539	802.368	831.055	885.803
329	0.73485	42.9712	99.4287	162.478	211.489	282.9	392.581	472.414	553.103	619.448	726.199	802.432	837.039	898.806
329.5	2.20182	44.9264	97.3556	153.142	214.909	293.156	402.165	475.651	549.443	615.788	735.173	797.612	824.651	901.738
330	2.57016	44.6844	95.0995	160.346	222.297	296.149	400.214	484.443	549.567	611.091	725.593	797.797	837.409	902.35
330.5	0.74123	45.0528	94.9185	157.541	219.796	293.954	388.62	488.412	554.94	609.323	726.022	792.733	834.176	914.621
331	1.96406	44.2614	93.0896	150.402	224.987	286.998	386.852	483.715	555.553	608.531	718.7	792.003	841.808	910.838
331.5	0.13513	43.8973	99.5614	156.446	229.261	289.014	386.182	485.365	554.578	621.9	714.857	785.535	838.514	908.216
332	1.23589	44.876	99.2583	156.021	230.057	284.805	389.358	481.827	566.788	626.114	715.469	774.734	854.385	905.289
332.5	0.07835	47.5027	100.298	157.549	228.289	279.314	384.966	479.754	563.189	627.703	713.213	772.966	839.251	900.774
333	-0.89608	44.5751	97.7978	150.776	234.455	278.95	384.114	469.258	560.444	613.118	709.187	781.819	843.647	914.631
333.5	0.20468	42.7462	98.6544	153.037	232.749	280.6	378.684	463.889	558.92	630.698	713.645	785.788	836.753	901.389
334	-0.22044	44.2131	97.6799	154.931	226.403	281.335	385.644	458.825	566.308	629.174	701.867	783.105	828.027	899.56
334.5	-1.50005	44.2763	94.6913	153.407	228.48	280.971	392.116	455.104	545.314	624.049	706.08	791.53	834.559	892.909
335	-1.19275	45.255	98.9659	164.335	224.332	276.822	399.625	456.022	554.044	623.502	712.552	796.72	818.692	890.287
335.5	0.33525	47.5154	102.081	161.834	227.813	281.402	391.326	455.047	554.351	625.885	721.466	795.44	819	891.204
336	-3.01955	40.7426	101.045	154.207	230.318	275.24	388.46	453.829	549.165	632.845	720.674	790.315	822.908	894.991
336.5	-2.285	42.3927	95.3712	156.467	230.991	281.712	391.575	460.361	546.421	636.265	717.869	782.993	822.178	891.88
337	-0.26872	42.8221	95.9837	150.122	222.937	281.286	383.215	466.772	553.625	634.192	721.838	780.615	825.842	904.883
337.5	-1.18212	41.9087	96.5962	151.04	219.338	280.434	381.813	458.107	562.477	633.95	719.643	780.739	823.952	901.223
338	-1.85138	43.5588	95.9269	148.051	215.678	282.878	376.994	460.551	556.559	626.872	706.706	789.103	833.537	902.873
338.5	-0.62855	41.7909	97.3329	148.053	213.605	288.983	382.611	458.295	561.383	629.742	712.079	792.584	819.745	899.03
339	-1.05367	41.9761	99.5323	149.276	221.053	292.037	387.069	460.433	568.648	634.872	709.884	787.154	831.893	892.013
339.5	-1.90603	42.1613	98.6799	150.438	227.403	290.452	389.146	454.515	569.871	635.484	706.956	788.072	856.675	895.372
340	-2.63633	41.37	94.2265	150.562	224.231	289.966	384.937	471.729	567.615	623.096	709.827	787.708	839.954	891.712
340.5	-2.57317	40.9449	91.8482	148.611	226.98	296.255	380.3	476.126	563.894	630.178	708.73	783.804	831.777	886.404
341	-3.48656	43.0833	87.822	151.299	221.062	299.065	380.608	478.813	568.23	639.03	710.197	781.853	843.376	887.993
341.5	-3.91168	43.8178	90.2656	151.301	227.717	299.555	385.92	487.482	564.814	636.164	709.04	795.344	844.843	881.708
342	-3.36024	45.651	91.2442	150.021	230.832	298.581	389.523	474.24	553.341	642.148	700.741	797.726	849.606	883.236
342.5	-2.93087	45.8972	89.0491	152.22	222.472	298.766	381.346	475.707	553.649	647.399	693.053	790.892	843.688	883.91
343	-1.64701	49.1342	90.0278	158.998	224.549	296.021	379.579	474.915	556.703	647.828	700.013	785.035	844.422	878.968
343.5	0.12514	46.6339	93.2648	159.122	230.045	294.803	378.055	477.908	550.174	635.257	693.545	788.638	850.772	875.552
344	-1.33758	47.9178	93.0228	156.133	228.765	291.936	376.043	474.676	558.538	645.208	700.994	794.561	844.793	884.832
344.5	1.77734	47.981	98.1518	156.135	220.771	293.098	370.491	481.636	564.338	642.097	700.813	783.638	849.983	888.374
345	2.02361	49.8752	92.7219	155.1	222.055	298.593	365.061	481.577	568.247	633.127	704.904	769.541	854.746	888.498
345.5	2.75816	47.9852	95.4706	157.238	215.283	295.788	373.547	480.846	564.953	628.185	709.85	775.463	853.527	881.115
346	3.61478	45.0577	97.731	159.438	214.857	292.799	379.042	479.262	567.641	635.817	710.524	780.836	843.581	887.465
346.5	5.08175	43.4729	94.8645	158.402	210.831	294.022	380.997	473.282	568.192	650.162	720.841	785.904	844.742	878.129
347	2.21522	46.0385	92.7304	157.611	210.406	305.316	390.826	475.299	565.264	649.005	721.209	788.043	853.106	882.098
347.5	2.58356	44.8199	87.6666	159.627	215.169	307.454	395.162	468.587	567.769	638.509	720.662	785.42	838.46	881.795
348	2.34155	44.822	84.739	161.887	211.509	303.001	390.708	472.434	567.405	630.149	720.298	782.005	838.523	872.947
348.5	1.79436	46.5331	85.8398	163.66	211.511	300.439	378.87	484.643	550.806	632.41	711.145	785.425	833.948	889.307
349	2.77305	45.6808	84.316	162.014	216.396	299.709	368.313	480.312	546.779	631.252	709.011	791.469	837.124	867.946
349.5	5.09451	44.6453	88.1633	160.429	217.07	301.725	367.887	489.714	561.979	638.273	710.6	789.274	829.679	871.916
350	4.18111	42.5722	86.8227	159.943	213.226	307.831	369.415	486.359	562.958	652.252	704.926	791.107	837.25	868.988
350.5	2.16907	43.3068	89.0221	162.753	209.139	303.866	385.531	492.648	563.57	645.419	703.524	790.316	843.6	886.69
351	1.01153	46.2996	87.7425	157.933	208.348	299.229	386.082	489.476	574.132	638.829	711.217	790.318	845.982	875.645
351.5	0.40331	43.0669	89.6367	153.357	212.745	300.086	388.526	483.863	564.49	643.164	702.491	796.424	840.674	882.544
352	1.68717	44.1066	89.0285	157.205	214.7	296.487	385.049	482.034	568.704	651.04	697.732	798.806	838.113	880.838
352.5	3.21518	44.2918	89.3968	159.221	219.524	294.658	379.131	480.327	566.936	642.558	695.232	795.696	834.758	878.887
353	4.43801	45.0874	87.3238	164.655	214.582	298.688	381.086	482.16	573.469	628.706	689.741	800.153	843.122	882.856
353.5	3.03633	41.9157	90.6218	164.413	218.063	298.874	372.36	472.397	573.715	626.571	702.56	796.066	843.307	889.633
354	2.06189	38.744	89.7694	163.805	222.277	290.209	372.606	467.699	568.529	623.827	704.576	792.406	852.037	892.26
354.5	0.90435	41.1265	88.0626	160.511	213.795	287.831	381.214	473.377	561.939	625.111	697.56	790.76	855.213	884.144
355	0.54027	45.4011	87.9426	159.476	218.192	283.743	387.93	467.032	564.139	624.197	690.421	784.171	848.563	886.282
355.5	1.03067	41.558	93.9872	159.356	214.043	285.027	392.876	474.175	553.887	634.27	691.521	791.253	847.71	888.543
356	0.11727	40.5836	93.1348	160.579	222.102	281.001	384.517	475.093	562.373	637.874	695.552	785.274	836.421	876.46
356.5	3.04909	40.9519	91.7332	161.863	216.428	295.163	379.453	475.583	553.708	648.679	705.503	789.548	840.696	882.505
357	2.5019	44.1279	91.9794	160.339	222.106	289.794	378.051	481.017	548.766	644.592	705.444	786.62	832.275	880.554
357.5	2.25988	44.6183	94.8502	163.515	220.094	285.097	392.336	471.864	551.271	641.603	706.606	794.801	845.949	885.5
358	-0.72871	42.5452	92.2889	163.517	215.458	288.151	394.047	472.111	560.49	639.469	700.687	789.371	832.34	884.525
358.5	0.00584	42.3032	90.2768	157.66	215.704	289.557	387.823	476.812	549.078	641.729	701.117	784.552	824.286	884.527
359	0.43521	39.1315	92.4762	153.817	221.26	294.564	387.703	469.063	550.057	650.765	705.147	786.873	824.715	870.369
359.5	0.19319	41.7581	95.5911	149.363	218.943	292.857	384.837	464.182	563.548	641.734	709.971	785.471	823.924	891.123
360	-1.69677	41.5772	95.9595	154.675	216.687	300.793	387.891	457.837	562.329	649.914	718.152	787.183	830.579	890.454
360.5	-1.2674	42.739	97.3654	154.799	221.511	309.34	382.339	467.36	562.514	637.588	716.933	794.509	820.876	899.001
361	-0.22767	45.1215	92.5458	155.473	224.015	302.629	386.491	473.527	558.61	637.956	710.16	792.741	822.465	885.637
361.5	-0.95797	43.5367	88.4585	156.696	231.708	297.992	386.127	474.506	561.664	640.033	718.708	808.368	833.881	891.193
362	-0.83377	43.1726	84.3713	158.59	226.949	306.966	389.425	478.231	558.187	634.054	716.207	808.981	835.653	891.561
362.5	-0.46543	45.3109	88.5849	161.4	227.501	297.996	393.761	481.407	555.015	637.657	720.604	804.893	821.19	889.305
363	-0.58538	43.1768	88.2208	156.519	230.555	296.045	385.706	483.668	545.13	629.725	720.423	800.928	838.343	893.152
363.5	-0.46118	40.6765	90.3591	154.873	231.289	291.104	380.581	486.233	553.799	636.807	724.514	802.029	840.115	891.323
364	0.27337	41.0448	91.9482	164.153	231.047	289.336	374.907	496.062	549.773	629.485	723.418	804.289	848.235	895.11
364.5	1.74034	44.9532	90.9737	165.864	225.556	285.554	381.013	495.637	556.123	626.679	731.11	813.874	843.049	900.544
365	1.07108	43.7347	88.6565	163.058	224.216	289.157	372.836	483.615	560.641	625.949	722.262	809.787	838.779	896.945
365.5	2.59909	46.3613	89.8794	156.469	223.729	300.878	371.679	474.706	557.287	628.087	734.227	807.409	840.673	894.323
366	1.62465	49.9645	93.1774	162.452	223.304	299.842	367.652	481.239	558.204	637.184	731.788	788.49	827.98	881.935
366.5	-1.30291	47.4642	89.2733	161.417	227.396	299.173	366.861	474.222	567.24	636.82	732.767	791.544	828.043	886.087
367	1.07959	47.6494	91.2895	155.682	229.9	299.541	371.38	482.098	558.025	642.254	736.248	801.983	823.284	891.277
367.5	-0.20002	48.0177	89.0334	159.163	217.695	301.741	378.584	487.41	542.402	638.411	717.512	805.708	810.469	894.087
368	-0.1979	45.7616	91.9652	163.804	221.543	302.353	376.877	488.694	538.681	639.267	714.341	805.832	821.274	886.46
368.5	0.23148	45.2754	96.728	161.425	223.193	301.623	374.56	481.86	536.364	647.326	725.878	803.454	831.042	894.885
369	-0.25468	42.7141	93.0681	162.282	219.35	299.184	382.741	485.158	544.911	640.797	719.533	799.733	834.34	900.075
369.5	0.78504	43.7538	91.6054	164.603	212.394	302.177	374.564	489.677	554.923	638.846	711.295	806.449	842.887	910.209
370	1.76373	41.3145	97.5889	160.15	221.612	296.808	386.163	491.754	538.751	644.22	718.072	806.878	834.405	914.789
370.5	-0.06519	46.3826	96.1872	163.997	218.441	298.824	382.564	484.432	541.744	647.762	722.713	815.059	838.985	904.964
371	-1.77205	45.0419	94.1142	152.037	222.044	289.06	370.176	484.251	546.629	653.929	724.058	805.052	839.659	901.975
371.5	-3.72305	46.0206	93.689	154.663	225.83	297.485	368.652	478.882	549.683	650.391	727.844	790.955	843.262	903.015
372	-3.47678	43.5813	91.3108	152.956	223.269	297.61	371.279	483.462	558.962	651.43	733.156	781.863	844.424	887.026
372.5	-1.88774	44.8041	91.1909	154.24	222.294	284.062	381.474	484.257	556.462	660.527	729.191	786.747	835.209	887.761
373	-2.67907	47.858	95.0992	146.796	221.137	286.444	383.002	488.898	561.103	654.181	718.146	783.393	836.127	870.063
373.5	-0.66279	47.616	92.5379	146.066	214.852	287.24	388.436	490.121	549.203	651.437	727.365	785.592	840.219	873.361
374	-2.36964	43.7119	93.0893	149.608	209.605	287.425	378.734	491.893	547.74	652.232	718.761	784.19	832.896	864.33
374.5	-3.52718	41.6999	94.007	145.46	215.406	292.676	385.877	495.374	544.752	644.788	718.458	775.526	841.871	866.712
375	-4.07437	39.4437	91.0184	151.993	216.201	291.397	384.109	497.512	548.66	639.969	724.746	781.204	835.83	868.423
375.5	-3.76707	41.7041	92.1192	151.323	224.199	291.887	379.778	489.336	548.235	639.91	713.884	795.671	832.414	872.148
376	-4.5584	41.5842	86.7502	146.748	222.798	295.674	387.104	482.807	547.382	641.193	699.116	795.063	831.928	885.151
376.5	-3.70178	41.8915	88.2172	147.299	219.077	299.277	394.98	475.119	549.704	636.801	703.879	797.69	825.034	884.848
377	-2.47895	45.0064	88.6465	153.344	223.9	301.72	386.803	468.896	553.49	632.531	705.651	791.344	837.365	878.991
377.5	-1.25612	44.154	87.55	155.421	214.93	304.652	389.796	461.268	550.319	632.411	709.132	781.031	842.372	875.758
378	-2.77988	42.0199	83.1576	154.691	222.745	300.626	378.995	459.989	561.49	634.976	716.764	769.193	851.773	871.732
378.5	-2.77775	42.9986	85.7232	150.359	218.658	299.896	381.805	461.7	559.966	635.833	719.024	786.895	849.517	871.917
379	-2.95873	43.7332	86.0305	149.385	214.387	297.945	377.779	474.031	565.034	639.802	718.721	773.958	853.548	873.811
379.5	-0.27105	42.5146	88.1078	149.387	217.075	298.252	374.851	464.878	563.572	643.65	719.455	787.693	847.507	884.006
380	-1.18445	44.4088	91.65	152.502	222.815	295.446	376.135	465.551	558.325	637.243	725.805	778.662	841.284	890.844
380.5	-1.60957	43.2513	89.1497	158.241	223.549	295.204	380.593	465.615	564.003	633.583	735.024	790.871	845.131	901.222
381	-1.30227	47.1596	94.7671	163.31	216.776	294.596	381.998	453.41	568.217	635.905	728.617	795.817	857.584	898.112
381.5	-1.78843	42.0348	92.8771	159.589	221.6	290.265	389.325	457.745	562.543	630.414	713.422	792.218	862.042	899.151
382	-0.01628	43.6849	90.1937	159.713	217.574	288.741	381.881	463.424	567.55	629.989	716.231	793.38	842.147	903.06
382.5	-1.54003	45.0908	89.2803	152.269	221.177	288.865	390.55	463.67	556.382	623.887	714.097	793.931	841.539	894.029
383	-0.74445	44.9098	92.3952	152.21	219.104	294.849	397.815	461.658	553.943	621.997	711.78	791.187	843.128	893.482
383.5	-1.35267	42.5316	94.6556	156.728	217.764	288.076	397.817	466.604	555.349	627.126	717.153	784.597	843.557	894.46
384	-1.41158	45.8296	93.9253	157.219	224.602	288.2	398.735	467.949	548.21	617.119	722.771	795.219	849.724	888.786
384.5	-2.63016	42.9021	94.0495	158.747	222.712	301.02	392.572	475.275	554.56	618.403	713.739	784.052	840.021	884.394
385	-3.05528	42.7211	93.5023	155.697	223.324	297.604	385.25	478.634	557.186	617.794	714.108	792.721	835.629	895.382
385.5	-2.19866	45.2867	92.4058	154.601	222.716	293.517	385.802	476.439	544.31	622.191	702.391	785.399	846.678	886.656
386	-1.15893	46.5095	89.2952	155.579	220.826	300.782	387.086	474.793	547.242	619.935	710.694	780.457	840.028	888.917
386.5	0.43011	46.6337	87.5883	153.079	215.396	299.991	391.543	470.462	549.563	646.182	709.537	772.952	856.57	882.998
387	1.28673	46.3917	88.0177	152.471	215.398	300.603	378.545	470.647	562.383	641.545	713.079	771.428	842.351	880.193
387.5	0.00711	46.2718	87.5926	144.294	214.607	298.164	372.383	469.489	551.094	636.115	717.964	769.355	841.987	876.777
388	-1.63871	44.5039	90.7075	139.352	208.933	299.509	382.883	478.281	544.504	635.69	720.407	773.019	840.219	881.052
388.5	-0.1107	41.6373	90.9537	143.383	210.033	294.506	376.293	472.729	545.177	630.504	721.63	781.322	841.442	873.119
389	-0.23065	42.616	88.9417	146.071	207.472	293.165	375.563	470.9	541.09	638.868	714.247	780.47	846.388	876.967
389.5	-1.81543	40.7871	90.2256	152.909	212.601	292.13	372.391	476.639	537.003	637.955	710.221	795.304	845.475	870.743
390	-2.78987	42.9255	92.547	150.714	209.002	295.855	375.994	472.003	544.268	638.873	723.895	787.921	851.519	868.609
390.5	-2.72671	45.369	87.4222	148.03	215.718	304.585	373.494	476.582	552.632	636.8	731.831	792.683	844.991	875.447
391	-1.93112	46.6529	85.3491	146.812	213.218	299.521	379.294	468.528	554.221	641.318	729.453	787.253	853.538	880.82
391.5	-1.74589	45.1901	83.093	154.016	213.891	301.599	384.424	467.248	542.627	651.757	717.797	795.8	846.46	868.676
392	-2.90343	45.6805	80.8368	151.271	215.419	303.981	373.134	472.194	546.535	644.313	724.636	789.394	860.683	874.538
392.5	-2.65717	43.4854	83.0972	154.02	217.924	292.387	375.517	457.731	543.119	636.686	703.703	793.119	854.337	869.23
393	-0.57984	45.0744	87.0666	154.022	218.048	293.793	375.03	458.343	542.755	638.214	709.564	792.633	849.152	870.209
393.5	-0.0284	44.1	87.9232	149.264	216.585	296.725	386.751	456.148	547.396	629.366	714.022	792.818	842.196	880.221
394	2.17099	45.9332	90.1837	156.224	219.212	297.947	384.495	456.272	558.995	635.838	716.16	786.839	840.794	881.199
394.5	3.39382	45.9964	94.031	159.278	219.031	291.114	395.362	459.204	569.129	631.629	701.392	782.813	842.688	892.859
395	3.33491	44.2895	97.4511	155.19	220.803	294.961	391.946	464.639	563.271	622.475	707.253	791.787	839.944	881.875
395.5	-0.32507	46.0006	97.4532	152.385	220.134	292.338	381.877	461.65	554.24	632.609	704.448	780.009	845.805	874.797
396	-0.50605	45.4534	94.0374	151.288	220.563	284.162	376.874	473.432	550.458	632.856	710.065	784.223	849.408	885.785
396.5	-1.05324	46.4931	95.1382	152.511	220.504	285.995	381.82	469.589	552.902	628.646	706.527	786.361	850.692	875.9
397	-0.44076	49.6081	95.4455	152.269	214.708	286.302	376.512	466.112	546.495	628.16	701.647	791.979	842.638	868.151
397.5	0.59896	48.2674	95.3865	149.647	220.264	290.76	374.561	474.415	550.037	626.82	700.733	800.465	842.396	872.059
398	-1.77928	46.4385	92.9473	154.349	220.389	296.072	382.681	481.131	552.603	623.77	700.735	793.509	847.647	871.878
398.5	-2.99786	48.2106	88.4938	155.755	225.09	297.051	383.66	483.941	543.816	621.331	708.794	791.802	842.644	883.233
399	-2.81262	47.2362	94.5384	155.94	222.956	301.081	384.394	470.698	543.208	617.06	717.707	806.208	840.876	873.347
399.5	-1.16255	44.2476	89.2915	154.599	219.113	285.703	385.922	477.353	547.971	626.218	715.024	802.487	844.235	873.105
400	-1.77077	39.7942	92.0403	162.658	216.735	290.221	380.676	476.623	550.78	624.938	710.876	802.489	835.326	866.943
400.5	-2.19589	42.9701	98.2069	155.946	222.841	295.35	378.541	464.723	558.168	626.649	705.629	799.379	841.188	877.748
401	-1.09513	45.2916	98.087	152.591	218.876	293.827	379.886	467.96	553.714	632.572	712.955	789.859	848.575	870.609
401.5	0.37184	44.2561	97.1125	157.659	221.807	302.618	390.57	470.526	545.294	634.405	712.042	794.866	836.553	864.141
402	0.12982	45.7231	96.5043	156.441	226.387	294.197	393.501	481.27	534.554	640.633	718.025	785.286	834.541	862.251
402.5	-1.63807	44.4435	94.9806	159.434	229.685	298.106	382.944	484.202	546.152	634.592	716.99	790.842	833.384	861.521
403	-0.11006	44.5677	94.3723	157.91	229.87	283.887	380.139	478.589	544.629	633.618	709.424	789.746	833.874	858.594
403.5	0.1362	43.166	90.3461	155.532	226.516	291.884	381.362	476.943	559.279	644.667	720.717	792.922	835.585	853.347
404	-2.42515	45.2433	90.4703	151.444	224.87	296.281	380.448	476.029	556.901	632.218	714.067	783.036	825.334	857.987
404.5	-1.93474	45.0623	91.8153	150.775	230.731	290.057	379.352	490.009	568.988	646.625	703.937	785.052	822.101	868.549
405	-2.05468	45.6748	91.9394	151.632	226.217	293.539	377.584	475.057	557.638	647.909	698.507	782.979	828.939	866.353
405.5	0.08367	45.799	92.4299	152.061	223.106	287.559	372.459	479.21	551.963	638.939	710.289	787.864	837.059	864.525
406	-3.21009	46.0453	87.8543	155.97	227.869	284.082	380.884	479.334	555.506	644.983	717.005	787.744	829.615	874.597
406.5	-2.35348	41.4087	89.2603	153.713	220.181	283.535	373.196	474.27	553.86	646.511	715.359	786.221	825.71	872.952
407	-0.5203	37.9318	90.0559	154.021	222.319	286.345	380.034	480.132	562.712	631.316	716.032	792.571	825.468	863.371
407.5	-1.79991	36.7133	91.1566	154.206	216.889	285.309	379.304	478.303	563.508	631.135	714.57	791.718	834.87	868.012
408	-0.76018	39.6451	88.9005	154.574	224.093	296.908	371.798	471.53	570.102	639.438	717.624	800.631	842.807	879.672
408.5	0.09643	41.7835	92.1985	153.966	224.828	298.009	376.927	477.025	561.986	649.571	715.123	794.042	833.531	883.092
409	1.01409	40.2597	93.0551	149.513	226.905	298.438	376.563	481.483	568.824	641.09	715.492	805.091	841.163	882.301
409.5	0.95518	39.2242	97.0245	154.153	227.518	299.051	367.654	476.724	558.755	648.904	714.212	805.276	845.926	892.618
410	0.16385	42.034	100.384	150.127	225.323	294.17	376.934	475.994	561.687	635.54	722.088	802.41	853.985	879.864
410.5	0.22701	44.2944	100.508	146.833	226.24	297.346	382.551	476.362	559.37	626.57	733.32	807.295	840.132	867.475
411	-3.86021	44.9069	97.3971	147.263	222.214	300.339	379.074	474.961	571.884	627.609	738.693	801.377	845.749	882.492
411.5	-1.17254	46.8011	98.0706	146.105	223.193	304.125	377.428	476.366	569.567	629.992	732.714	805.102	848.864	887.194
412	-0.6211	42.8359	99.9648	152.15	221.486	299.184	381.093	466.42	567.555	630.482	720.143	806.447	846.486	874.501
412.5	-1.3514	43.3874	98.319	147.696	218.863	293.204	385.001	475.272	571.158	631.156	713.553	789.298	845.817	887.076
413	-1.4103	40.3988	94.7811	143.792	217.462	296.197	385.308	491.815	567.254	626.825	725.274	790.46	847.833	871.514
413.5	-1.89646	40.3399	92.5249	145.687	217.281	295.65	388.912	484.432	568.294	621.211	729.732	786.434	837.032	872.676
414	-2.44365	34.9709	91.7336	148.435	219.48	291.135	383.909	479.429	560.422	623.35	726.926	781.797	836.912	874.387
414.5	-0.73254	36.3158	94.6654	150.024	226.684	294.8	388.794	472.961	564.819	630.31	726.074	786.987	848.327	874.389
415	-1.15766	40.2242	90.8833	151.308	229.25	291.079	387.209	462.587	562.075	646.853	721.01	777.773	844.667	871.95
415.5	-1.58278	41.447	90.092	157.048	222.294	291.996	392.033	461.674	560.978	641.056	714.176	778.691	832.829	881.962
416	-0.54305	40.3505	86.8593	157.904	226.813	286.017	392.706	464.728	557.257	646.613	712.287	791.51	823.737	888.251
416.5	-1.33438	39.193	90.3404	157.235	229.745	282.113	398.934	476.083	565.072	633.431	701.119	800.607	838.021	886.361
417	-2.49192	38.2185	88.3284	156.566	231.517	278.27	390.147	475.596	558.177	625.621	705.15	807.933	831.37	880.076
417.5	1.17231	39.4414	90.7719	147.168	225.66	283.643	394.056	474.683	562.696	619.764	709.241	824.475	835.279	885.022
418	0.56409	43.6549	94.8634	148.818	226.333	289.138	386.978	468.46	570.938	625.503	728.225	811.111	835.22	876.174
418.5	-0.89863	40.6053	96.6355	152.361	226.579	285.417	386.797	474.992	564.775	640.093	737.627	808.855	845.659	878.313
419	-2.54445	41.8891	99.1401	152.058	227.741	285.664	388.996	483.784	561.787	636.433	736.774	796.345	848.408	877.888
419.5	-2.78647	41.2809	97.3722	154.806	218.893	291.708	381.857	482.687	557.028	639.303	732.138	789.877	839.682	887.228
420	-4.00504	42.1375	92.6746	154.015	223.229	286.034	372.46	483.422	555.687	640.77	726.342	795.128	840.416	882.775
420.5	-3.08739	41.4072	93.4702	157.13	222.804	274.745	378.138	490.077	550.929	637.476	725.55	799.952	841.273	881.434
421	-3.14629	35.6721	92.862	153.897	215.054	270.535	383.206	487.271	553.983	636.746	729.398	789.09	834.866	881.436
421.5	-4.4259	37.9935	94.329	151.519	214.995	273.467	380.828	483.55	543.12	618.987	731.658	790.374	835.601	886.199
422	-3.38618	36.9581	96.7115	154.512	219.758	285.615	379.487	475.557	536.47	616.792	719.941	802.461	834.321	898.835
422.5	-3.26198	40.134	99.9485	156.223	220.798	285.617	376.316	469.089	531.101	631.931	709.384	801.059	834.934	894.138
423	-2.16123	40.3192	100.805	156.286	224.523	288.976	387.487	479.833	531.042	635.717	710.974	796.24	837.377	887.792
423.5	-3.74601	39.4669	97.3892	153.908	220.802	285.194	393.044	481.85	532.326	627.541	716.774	793.434	835.06	874.245
424	-1.54662	39.3469	97.4524	156.534	216.41	282.023	394.022	488.016	532.389	632.853	703.104	787.699	843.302	882.548
424.5	-1.48346	38.8608	98.0038	150.921	215.313	285.016	398.175	485.333	532.086	637.066	711.651	784.588	827.191	873.028
425	-0.50477	39.046	94.7101	157.454	208.296	291.243	389.754	483.931	532.271	639.937	716.597	790.023	834.334	879.988
425.5	-0.50264	42.9544	93.6746	157.334	203.599	297.898	381.822	479.905	528.123	645.554	708.665	784.104	832.444	868.821
426	-0.01224	40.393	91.2353	155.139	203.54	296.68	391.772	485.767	532.336	650.256	710.498	790.393	833.911	876.331
426.5	0.41714	39.5407	90.8102	158.742	207.692	297.17	393.545	489.309	532.461	664.357	720.998	788.381	826.04	875.234
427	-2.02214	40.3973	91.7889	163.444	212.394	299.003	382.011	482.719	536.003	663.322	705.986	793.083	827.812	885.795
427.5	-1.65381	38.8735	92.0352	159.418	209.101	291.864	385.065	476.74	533.38	654.779	716.791	797.846	830.377	876.032
428	0.60662	38.4484	88.07	161.617	212.643	298.641	389.217	483.395	539.547	651.913	723.629	797.36	823.971	887.692
428.5	-2.0768	40.892	90.5746	159.239	212.279	297.972	383.055	488.28	546.629	643.553	718.382	799.071	817.015	876.28
429	-2.50192	41.6265	89.1119	154.603	213.44	302.002	378.785	491.822	554.078	639.1	722.779	791.871	814.942	876.221
429.5	-0.48563	41.5066	86.7946	155.886	208.56	301.76	389.163	489.81	559.451	641.482	732.974	796.695	815.982	874.575
430	-0.11729	43.3397	87.6513	157.231	213.506	305.791	386.907	481.633	560.552	643.193	745.976	803.838	816.289	887.09
430.5	-1.51897	40.9005	89.7286	158.088	216.926	300.3	390.998	480.109	548.652	648.994	738.41	789.68	817.939	888.618
431	0.19214	39.9871	89.6086	156.93	224.374	302.682	390.939	476.877	555.917	651.62	735.361	801.401	826.608	880.258
431.5	0.92668	40.2944	90.038	155.407	227.306	302.868	383.007	470.653	561.84	664.562	734.935	812.023	824.413	887.035
432	1.53916	41.273	93.1529	153.089	226.698	305.128	383.802	464.491	555.799	667.066	720.777	804.151	824.354	880.873
432.5	2.82303	40.4817	94.1316	152.603	222.916	304.154	386.673	464.188	550.064	655.899	728.47	806.9	821.182	883.927
433	0.32271	42.437	92.0585	147.662	221.819	303.118	377.703	470.171	569.231	656.328	731.89	801.165	821.673	880.694
433.5	-0.28551	44.8805	96.7604	151.021	220.357	294.026	376.79	467.305	562.52	641.865	732.136	805.745	822.529	886.86
434	1.30353	42.5633	95.847	155.051	225.547	292.685	377.341	466.086	567.893	649.131	729.392	803.916	840.537	878.44
434.5	-0.5254	39.8188	98.3516	147.18	222.68	297.57	382.226	475.305	571.435	649.133	722.985	811.486	841.943	885.644
435	-1.98812	39.5158	101.405	150.783	223.048	290.553	389.98	483.669	568.935	647.304	707.362	800.99	845.668	877.528
435.5	-2.77945	39.8231	89.4447	151.029	221.097	290.311	389.249	487.333	572.538	652.189	711.82	800.138	836.027	875.089
436	-0.76316	43.3653	88.104	152.069	217.987	288.604	378.509	478.973	567.108	659.881	705.536	812.958	834.32	864.898
436.5	-2.40898	40.1325	92.0734	148.897	213.839	281.221	375.704	478.731	563.57	658.663	700.96	809.053	836.519	869.783
437	0.09559	39.8905	93.5404	150.913	211.827	287.754	371.25	485.63	562.412	664.707	711.216	799.656	847.019	862.888
437.5	-1.79438	38.4278	91.2232	154.578	210.364	299.963	384.863	487.952	573.584	649.756	710.242	788.062	850.012	858.008
438	-0.02223	39.4675	90.3708	155.617	214.211	298.684	377.48	476.174	572.915	644.265	707.802	794.167	844.521	850.93
438.5	-0.75253	38.31	87.8095	150.432	214.396	302.165	384.257	471.904	576.945	655.803	700.541	779.277	847.209	850.139
439	-2.94766	37.7628	91.1685	157.636	215.741	295.819	388.959	476.728	577.008	655.805	704.389	786.481	840.68	838.605
439.5	-1.90794	39.7791	91.8421	161.361	215.621	295.577	378.402	466.903	565.597	647.384	716.781	788.131	838.241	841.842
440	-2.14995	41.7343	89.5859	158.556	218.492	307.481	383.714	472.398	562.303	645.86	713.548	792.406	828.355	856.798
440.5	-2.51404	42.2247	85.3155	160.145	215.32	304.066	386.158	464.405	563.77	658.924	704.883	800.159	822.193	846.485
441	-2.26777	44.4241	86.1111	155.386	208.792	296.377	392.752	477.285	567.862	652.761	712.698	802.359	826.101	851.614
441.5	-2.0215	40.0928	88.9209	152.581	215.081	294.548	384.331	470.33	573.784	646.355	702.202	802.3	828.057	853.386
442	-3.17904	45.6491	95.942	154.597	214.35	293.94	376.582	477.778	572.627	641.963	702.326	792.597	834.956	856.379
442.5	-2.4445	45.6512	94.8455	155.331	207.883	294.247	376.279	472.897	571.835	639.645	709.592	805.295	836.484	858.823
443	-2.01512	44.1275	96.6177	156.859	214.782	291.137	383.544	473.876	565.856	637.694	708.617	787.719	830.077	862.06
443.5	-1.40265	46.632	90.1501	156.251	214.479	305.36	375.917	471.315	573.121	647.95	705.14	797.914	827.882	872.316
444	-2.01087	44.3758	89.2977	155.704	214.298	308.109	379.642	467.838	571.659	648.563	707.95	793.949	821.048	873.05
444.5	1.47026	45.2325	93.3892	154.852	213.018	296.819	388.067	474.859	568.06	656.011	715.948	796.88	823.064	862.127
445	5.07346	41.0232	90.7668	154.182	213.02	303.108	382.454	463.569	565.01	660.103	713.692	793.342	838.814	844.734
445.5	3.91592	41.3305	93.3324	149.668	216.196	298.96	397.104	462.839	565.195	664.683	720.347	794.626	839.487	859.934
446	2.94148	40.295	90.5269	148.571	219.067	294.628	387.829	466.198	556.286	657.91	710.034	806.774	845.715	860.18
446.5	4.28638	42.0671	96.3884	144.484	219.252	299.574	390.456	469.801	553.481	650.893	708.632	803.847	841.75	842.909
447	3.86126	40.6044	97.6113	147.843	221.696	299.577	390.641	481.522	547.807	638.749	717.24	792.741	849.259	843.827
447.5	1.84923	41.0338	94.6227	153.155	221.515	301.654	397.174	473.712	543.658	647.906	715.716	793.231	853.168	842.608
448	1.48515	38.6556	94.1975	154.622	221.029	306.356	398.763	463.521	559.774	644.368	709.432	795.369	841.573	841.207
448.5	-0.03861	40.977	95.2373	152.915	232.261	309.471	393.516	471.885	556.297	640.281	699.18	786.094	838.584	844.993
449	1.36733	40.5519	91.2721	153.894	224.573	302.698	394.922	471.338	555.444	639.917	699.304	783.35	847.009	854.15
449.5	1.7967	43.3616	94.5701	153.164	217.861	303.249	397.243	467.861	560.268	636.501	689.907	779.262	850.063	880.031
450	3.08057	39.1523	86.0273	158.415	221.831	304.594	389.494	472.014	558.073	637.236	691.496	786.345	852.141	863.188
450.5	0.45818	39.5207	86.7619	163.117	222.931	310.212	395.783	465.668	553.131	628.937	687.775	774.506	846.1	874.665
451	0.2772	38.4242	87.0082	161.532	218.722	309.909	381.991	467.257	553.012	627.658	684.115	782.199	846.469	861.971
451.5	-0.14792	39.9522	88.231	165.685	226.292	303.563	379.308	469.457	551.183	634.068	688.512	775.853	852.757	860.387
452	0.03732	41.114	92.5056	158.057	221.29	300.025	385.718	468.787	554.053	635.963	693.03	771.827	846.29	862.464
452.5	-0.44884	42.2758	93.4232	156.9	217.813	303.445	387.552	467.508	562.6	635.11	703.653	784.28	839.578	860.391
453	1.1402	45.7569	92.815	156.231	215.435	303.325	392.07	457.988	562.48	637.859	707.683	786.602	856.182	857.219
453.5	2.05786	41.3645	91.2302	154.646	221.906	297.102	385.969	468.55	567.61	639.448	700.117	782.331	856.977	861.128
454	1.81584	42.2211	92.392	154.831	223.068	296.616	387.863	468.918	566.452	640.915	701.218	796.188	848.984	853.195
454.5	0.35313	42.2843	91.9669	156.359	216.357	297.533	392.809	472.033	560.351	642.199	702.196	787.524	855.089	847.46
455	-2.08615	39.6009	94.0442	150.502	221.974	296.437	402.76	474.72	563.588	642.872	707.386	802.479	866.078	852.528
455.5	-1.71782	39.7861	91.0556	146.415	221.244	296.439	403.556	479.056	552.909	640.555	707.389	802.603	868.521	866.568
456	-3.91295	39.7882	87.0905	143.975	221.124	296.99	416.07	476.312	545.892	637.322	703.973	804.803	863.641	848.016
456.5	-3.36151	37.5931	87.3367	140.926	225.581	303.584	416.927	481.807	548.518	646.419	706.66	799.861	869.319	857.295
457	0.6079	37.7173	91.062	143.552	222.471	302.061	411.497	484.617	546.262	651.121	703	803.586	869.443	865.049
457.5	-0.1224	41.5646	93.5055	146.85	219.238	307.678	417.053	481.14	552.612	646.667	702.758	800.048	863.769	869.812
458	-0.79166	37.7826	93.4466	139.955	218.63	320.619	410.951	464.54	547.975	635.378	713.747	798.525	849.977	870.851
458.5	0.55325	39.6768	96.8667	140.873	224.308	313.541	405.583	478.031	549.747	647.465	713.322	792.789	846.928	865.238
459	-0.54326	39.9231	99.9206	148.26	222.113	312.445	401.19	472.601	548.59	641.058	710.821	797.064	850.348	873.541
459.5	0.31336	38.0941	100.655	151.681	222.725	308.907	391.854	476.388	560.921	650.46	717.537	793.343	844.674	869.881
460	0.80377	40.0494	96.8731	154.612	220.774	305.98	394.481	481.395	561.9	654.612	714.854	787.486	833.812	875.315
460.5	3.2473	40.4787	100.415	150.769	219.007	302.259	390.332	479.81	552.686	658.338	716.382	787.061	827.161	871.472
461	2.517	43.4106	99.5629	146.682	213.943	297.195	393.508	490.676	544.448	659.499	711.196	780.532	840.347	863.113
461.5	0.50497	42.0699	98.5274	145.402	215.288	296.831	402.544	483.293	543.596	656.511	706.865	776.262	847.124	859.819
462	1.05641	40.4241	93.5857	144.611	216.877	296.833	399.25	480.671	547.26	651.813	711.017	773.09	852.558	862.14
462.5	-0.28423	38.7172	93.5878	144.43	219.747	292.44	393.515	488.363	554.586	657.675	700.827	780.783	835.653	864.828
463	0.14514	37.6818	93.5289	145.714	224.51	286.034	397.484	482.079	550.682	658.47	706.017	781.029	840.904	877.342
463.5	0.39141	38.0501	91.2117	151.392	224.696	281.947	393.641	481.654	547.51	645.411	705.042	778.895	840.54	873.194
464	-0.7051	36.9536	92.5566	147.122	222.867	285.855	388.333	482.998	546.292	649.991	700.528	773.953	826.382	867.032
464.5	-0.64194	41.0451	94.756	146.392	220.672	290.557	382.476	481.047	548.98	642.791	701.323	776.885	832.305	864.776
465	-1.18913	43.1224	96.4061	146.394	225.312	294.282	379.853	481.172	543.611	643.22	708.406	792.817	828.156	849.58
465.5	0.46095	41.7818	91.7085	138.95	222.995	298.068	388.889	469.638	542.392	648.959	709.262	791.599	838.29	851.047
466	1.80585	44.4084	92.1379	145.971	215.368	303.136	377.599	472.692	564.367	647.192	714.391	796.361	827.917	862.401
466.5	0.40417	44.1053	92.9335	143.41	223.305	305.153	374.489	472.755	555.397	644.264	716.285	796.73	824.806	868.202
467	-1.72994	44.7178	92.7525	148.844	220.255	307.047	368.082	465.311	545.389	642.496	716.41	805.948	833.78	866.739
467.5	-0.75125	41.5461	92.1442	147.259	222.393	298.565	373.394	468.487	542.279	651.47	718.67	806.805	825.421	861.553
468	0.10537	42.4027	93.1229	150.923	232.222	302.29	372.969	473.25	540.022	651.35	712.569	811.446	827.01	861.25
468.5	-1.54045	43.0152	93.3692	147.874	228.257	297.227	370.896	473.069	521.775	648.057	697.678	802.292	820.054	861.436
469	-2.39282	44.9705	92.8831	146.594	230.822	294.116	377.124	481.738	535.327	647.387	693.835	797.656	827.685	863.696
469.5	-2.39069	40.1508	90.1386	143.727	235.768	286.611	376.638	478.871	543.508	644.826	703.786	793.508	829.213	874.868
470	-0.13026	40.0309	93.6808	152.641	236.32	295.097	376.945	471.916	538.078	644.096	702.995	793.693	825.492	871.208
470.5	0.05497	39.7889	88.1287	148.248	241.144	296.93	380.365	468.134	541.986	657.831	693.597	798.517	843.622	866.144
471	1.09469	41.8662	92.1591	149.044	243.221	301.571	385.555	462.154	555.477	652.096	695.003	797.97	839.351	866.817
471.5	-0.00181	41.6852	91.2457	147.764	237.12	304.808	386.9	459.898	564.085	651.732	711.729	787.779	848.387	860.228
472	-2.38006	41.8704	90.0272	149.17	235.169	307.617	386.475	466.614	572.632	650.574	708.374	794.251	847.412	875
472.5	-2.13379	41.5674	86.1841	149.844	226.992	310.854	382.327	474.917	577.761	661.562	710.207	789.614	858.584	852.541
473	-0.23957	42.3019	92.9001	149.541	222.783	311.284	382.451	479.253	577.885	652.837	705.815	791.325	854.985	857.548
473.5	0.06773	42.9754	88.6908	147.651	230.109	312.629	376.105	472.236	577.582	657.416	707.648	789.802	849.799	856.818
474	-0.7236	41.2686	92.6602	142.221	222.299	312.387	372.506	478.463	576.547	652.475	714.303	778.207	845.59	854.074
474.5	0.31612	39.3176	96.6906	141.613	218.517	314.647	378.917	470.531	573.619	647.594	708.385	776.439	835.155	855.052
475	0.56239	41.2728	94.1293	145.277	221.754	310.987	387.281	466.81	570.631	654.127	695.814	785.841	834.425	854.078
475.5	1.60212	36.209	94.8638	146.255	219.376	320.755	384.964	468.033	572.708	648.819	717.667	782.608	826.736	860.916
476	2.27563	40.6667	92.6077	146.563	220.232	319.78	389.177	475.115	577.349	643.511	723.467	787.676	836.992	865.618
476.5	-0.16365	43.2934	94.4408	142.353	223.469	314.045	387.898	470.906	575.093	633.686	723.652	787.983	834.614	864.582
477	-2.9081	41.7086	94.0157	136.557	224.021	316.733	400.107	463.156	576.743	634.604	723.837	792.014	836.997	863.425
477.5	-2.96701	45.5559	91.1492	141.625	221.581	306.908	390.832	456.994	582.665	630.517	726.525	793.237	838.158	873.376
478	-3.08695	43.1777	93.9589	141.872	222.438	302.272	389.247	467.616	582.362	636.989	721.644	796.474	833.339	873.988
478.5	-3.26793	43.546	91.0314	143.766	221.036	298.368	391.202	459.44	585.599	633.634	719.449	801.419	836.271	878.995
479	-3.93719	39.3367	95.0008	144.195	213.775	302.154	390.899	467.437	584.442	630.706	708.16	806.06	827.545	874.542
479.5	-3.62989	43.3061	96.1015	149.812	219.087	304.72	393.282	463.777	589.327	622.041	713.838	793.184	837.068	875.276
480	-1.55257	42.6369	94.6999	154.209	220.188	302.708	381.382	467.258	584.263	623.02	720.249	792.332	833.286	877.415
480.5	-3.44253	42.8832	94.3968	152.197	221.411	298.865	392.615	465.491	577.002	630.285	704.565	797.095	839.026	878.21
481	-1.36521	41.5425	98.3052	152.382	219.704	293.557	397.866	472.634	571.694	631.691	701.455	805.214	828.713	880.959
481.5	-0.50859	37.2722	99.4059	151.469	222.514	298.869	389.506	476.847	566.081	638.041	710.002	792.765	820.353	891.459
482	-0.26233	38.3119	98.7977	152.753	222.577	308.514	392.316	477.765	564.008	628.888	704.572	795.148	823.285	873.639
482.5	-1.17573	38.4361	99.5323	151.473	229.354	305.343	387.435	475.814	565.475	634.261	706.771	783.065	821.334	870.65
483	0.65745	40.2693	98.5578	152.696	227.586	306.199	379.442	469.591	573.778	632.982	710.924	793.138	824.754	874.193
483.5	1.75821	42.7128	92.5785	151.111	226.978	311.023	380.054	465.259	566.578	634.998	722.644	790.943	823.413	885.608
484	0.78378	42.2266	95.1441	153.738	219.595	311.514	373.281	458.853	569.204	626.455	707.693	792.837	809.561	879.629
484.5	1.51833	42.1677	95.2073	154.594	215.324	313.896	380.73	462.944	578.117	631.889	714.226	789.543	804.741	868.95
485	1.21528	41.9868	90.998	159.785	211.176	308.222	390.009	462.58	574.518	645.93	720.392	787.653	815.668	872.309
485.5	1.82775	41.8668	86.3614	156.918	209.53	306.698	390.133	457.76	569.882	634.64	711.117	787.777	819.149	872.006
486	2.13506	43.761	91.5516	160.765	207.701	310.729	386.473	453.612	571.288	634.581	715.514	789.427	821.044	872.679
486.5	-0.42629	42.2983	92.4692	155.519	210.267	305.665	381.41	454.713	569.703	632.874	714.356	785.035	822.816	865.907
487	-1.27866	41.0187	95.2179	157.23	213.199	308.841	387.454	461.917	573.001	635.562	714.847	778.934	828.86	863.223
487.5	2.26351	42.1805	95.3421	152.41	216.436	315.313	390.752	467.657	572.088	638.86	715.398	780.706	830.144	860.662
488	0.86183	44.563	93.5132	152.839	216.987	305.977	399.055	463.569	571.174	644.294	703.132	775.52	847.786	854.011
488.5	0.13153	40.0485	95.7736	149.79	215.83	300.73	393.015	454.416	578.134	636.118	706.98	771.494	843.332	864.145
489	0.25573	42.6752	99.2548	147.289	222.057	294.323	385.327	464.184	580.883	650.219	705.883	781.078	845.348	867.382
489.5	0.01371	42.4331	100.661	148.573	223.097	294.325	379.713	463.454	575.453	654.433	711.562	777.663	837.904	860.365
490	1.48068	44.3274	98.2214	147.416	226.7	291.276	370.804	463.761	562.028	649.247	705.094	776.566	825.028	871.903
490.5	1.05556	41.2777	102.496	148.516	219.378	295.123	367.816	469.134	574.481	649.066	700.274	786.822	820.33	867.083
491	-0.95647	41.585	101.583	150.106	221.273	292.256	365.56	474.69	576.192	645.101	704.122	790.12	828.328	856.771
491.5	0.57154	42.4417	104.636	150.352	226.585	293.845	370.261	480.003	574.241	634.971	713.889	786.216	822.044	859.275
492	-0.09772	44.4579	108.179	151.819	226.648	293.664	384.241	480.005	578.821	628.137	710.351	787.683	818.14	850.244
492.5	0.02647	44.9483	105.312	161.648	226.345	287.258	377.407	486.294	577.785	616.665	715.053	785.183	826.626	856.594
493	1.18827	42.8142	105.192	160.49	225.92	279.02	379.362	477.507	578.886	621.733	719.206	784.025	827.116	861.845
493.5	2.5942	43.0605	101.959	158.539	220.673	298.92	379.914	466.767	573.7	621.735	722.504	786.164	828.461	870.392
494	0.82631	42.0861	99.8253	156.039	226.046	291.171	374.972	464.022	569.491	622.469	722.872	785.128	828.219	865.511
494.5	0.09602	42.1492	97.0809	153.844	228.123	295.384	379.429	470.677	569.249	631.505	729.771	790.135	846.715	858.861
495	3.51611	42.9448	95.1299	157.569	226.233	283.912	378.882	466.407	571.082	638.831	725.257	790.625	840.125	863.196
495.5	3.94548	41.238	93.7892	157.754	225.869	294.412	368.325	460.488	563.577	636.209	726.297	777.383	852.212	861.245
496	2.3607	43.4374	91.1668	157.939	227.275	295.818	366.618	472.759	563.823	636.943	716.35	768.169	848.308	856.548
496.5	2.36282	43.3785	90.0093	155.683	228.376	296.064	368.513	475.69	565.778	636.64	715.681	777.387	854.963	846.418
497	0.41182	41.3664	92.697	150.619	227.951	291.183	382.431	462.631	562.24	634.933	711.471	782.089	852.585	860.58
497.5	2.12294	45.58	94.9574	153.978	228.441	289.537	381.884	468.431	555.529	635.607	719.713	789.721	851.244	859.972
498	-1.1098	43.629	96.6685	158.802	226.124	298.023	382.313	466.603	549.916	633.534	721.119	797.291	848.622	870.777
498.5	-0.31422	44.4246	95.8161	162.711	234.671	304.129	381.461	457.755	557.303	633.597	706.29	781.546	858.511	874.747
499	-0.06795	45.7694	92.4613	165.154	237.237	301.385	380.425	454.888	566.277	637.444	701.653	775.994	856.072	876.885
499.5	-0.85928	43.025	96.1866	159.846	238.46	303.767	389.705	464.839	557.612	633.967	696.345	773.86	847.468	871.089
500	-1.40647	39.8533	93.5642	160.703	239.438	313.962	386.35	453.427	561.032	637.204	696.164	775.693	837.217	881.101
500.5	-0.79399	42.1137	91.9794	160.278	240.295	309.265	383.178	451.538	564.33	638.732	704.467	781.799	839.05	878.906
501	0.24573	40.1017	93.0192	163.393	242.616	307.924	386.781	444.337	559.999	638.185	702.821	776.796	832.826	864.931
501.5	2.07891	40.8973	96.9275	160.892	242.252	302.372	384.098	446.537	553.226	642.277	712.528	770.328	830.387	870.365
502	0.55516	41.1435	97.6011	159.979	242.132	303.534	387.579	448.492	553.473	640.631	711.798	774.786	826.422	853.46
502.5	-0.17513	41.0236	100.96	161.019	229.378	301.705	378.121	454.659	563.362	641.06	699.837	775.399	824.776	845.589
503	-0.78336	41.2699	102.366	154.246	224.986	312.693	373.972	467.783	568.553	647.044	707.652	782.603	824.839	849.925
503.5	-1.33055	39.8682	103.467	152.173	217.236	310.803	376.477	470.837	562.573	649.426	710.217	791.028	819.226	853.162
504	-0.04668	38.8937	103.225	149.245	217.177	318.862	380.935	483.169	557.509	638.747	711.135	790.847	817.58	848.403
504.5	0.38269	41.1542	98.8934	146.684	224.138	315.019	374.833	468.156	557.206	641.374	714.86	799.577	828.141	851.091
505	2.27691	41.8887	96.271	142.719	226.825	313.983	378.192	471.21	557.208	645.16	709.735	798.542	822.162	862.628
505.5	-0.40651	39.4494	94.7473	151.754	221.761	314.779	382.101	465.353	564.169	641.317	705.221	801.962	837.179	854.269
506	-0.9537	39.9398	95.726	149.864	220.909	314.537	379.234	465.538	571.556	653.77	705.833	808.006	831.383	861.961
506.5	0.20809	41.2237	100.306	145.167	220.972	304.957	382.471	469.752	574.671	658.533	701.136	805.75	829.371	867.762
507	-0.5222	42.3855	99.2092	138.394	225.064	300.93	382.718	467.19	569.79	646.511	698.269	801.968	833.34	867.764
507.5	-1.67974	42.8759	96.831	144.988	227.263	305.571	383.391	473.113	567.351	652.007	700.163	801.116	832.244	859.221
508	2.59484	44.465	95.9786	143.037	228.486	300.263	381.013	479.401	567.292	648.591	706.147	805.451	841.218	862.58
508.5	3.32939	43.0633	99.887	149.325	225.07	303.561	379.916	475.07	569.186	645.663	707.187	798.068	843.051	867.953
509	2.90427	45.812	101.781	153.539	224.523	313.268	378.82	469.274	557.653	650.609	694.433	791.051	854.772	857.396
509.5	3.944	45.0207	99.2809	156.593	225.685	310.585	387.489	467.689	564.918	639.869	695.228	791.053	844.093	868.934
510	3.15267	47.098	94.8885	158.365	221.048	300.272	384.5	468.668	557.657	648.172	696.695	792.703	849.405	863.687
510.5	2.17823	45.4522	94.7075	159.893	214.703	296.368	386.089	474.895	557.781	640.606	708.66	806.499	850.445	860.271
511	0.28827	43.3791	90.6203	152.998	212.935	298.689	387.373	476.729	554.304	640.974	708.418	796.858	850.081	860.518
511.5	4.19664	45.6395	90.7445	149.216	217.087	300.217	387.619	482.285	550.583	652.207	713.12	790.451	847.886	869.187
512	2.0015	48.2051	96.2398	151.965	214.953	296.374	390.246	476.916	552.783	634.387	710.803	788.439	840.991	870.104
512.5	2.73605	49.9162	98.8054	155.995	211.11	297.17	386.159	475.148	561.452	640.798	709.95	781.178	833.669	862.843
513	3.16543	48.3925	97.7089	155.753	216.056	297.66	387.321	477.592	557.67	645.438	720.878	785.514	834.464	861.381
513.5	0.2989	49.5543	97.1007	150.384	221.795	298.334	391.351	484.491	566.583	648.187	710.687	786.188	828.302	850.946
514	2.37622	47.9085	98.8728	146.846	215.694	287.838	385.616	485.469	562.008	647.029	709.957	782.039	823.482	855.404
514.5	-0.06306	43.1498	101.255	147.825	215.757	285.032	378.66	484.617	554.624	643.431	711.851	785.52	830.076	837.828
515	-0.06093	42.3585	96.6188	151.978	211.426	295.288	371.887	487.366	556.702	646.851	705.628	782.898	823.425	842.529
515.5	3.72538	43.6424	97.7805	157.595	215.151	296.45	367.251	490.725	550.051	643.008	720.522	790.102	832.217	851.931
516	1.71334	44.438	95.9516	148.564	209.721	302.617	367.741	481.633	551.152	651.86	719.304	787.48	832.951	849.797
516.5	0.25063	43.0973	96.32	148.139	208.442	298.407	377.875	476.508	553.595	652.228	717.414	789.923	831.977	851.081
517	1.22931	38.827	95.5286	153.146	209.786	296.029	378.854	488.229	557.809	655.526	713.937	792.062	825.875	858.285
517.5	0.86523	42.4912	91.5635	149.974	213.451	295.36	375.316	496.532	566.112	645.885	713.145	799.144	830.76	851.634
518	0.74529	42.3102	93.3356	148.878	215.955	297.864	377.027	492.994	559.705	639.722	719.373	807.203	843.397	852.247
518.5	-0.71743	40.054	90.8353	150.467	216.385	292.862	374.71	478.775	565.262	630.813	718.765	807.205	834.793	849.807
519	-1.32566	42.1924	88.396	154.192	221.147	295.61	370.378	485.979	559.648	628.984	722.002	805.193	825.64	864.336
519.5	-0.53007	42.5607	89.2526	159.138	217.182	293.415	371.845	491.657	569.599	637.714	725.056	807.88	820.271	864.155
520	0.38758	39.5111	89.1327	154.501	213.156	293.295	388.51	484.091	564.902	635.214	728.72	797.995	816.794	874.35
520.5	-2.47894	39.147	82.0547	153.405	217.126	294.701	388.085	485.314	561.73	628.747	730.675	796.654	814.11	875.512
521	-0.76783	37.9895	86.6955	158.656	215.358	283.107	386.195	482.386	561.183	621.119	717.311	804.835	815.638	871.058
521.5	-1.68123	38.9682	89.2611	154.447	217.13	287.87	383.756	482.572	565.702	625.211	716.153	790.25	809.781	865.506
522	1.00644	40.7403	91.8878	158.233	215.362	286.468	380.218	476.104	569.549	624.419	712.066	795.806	804.778	866.424
522.5	-0.82249	38.4841	88.9602	158.479	214.937	287.447	382.112	486.421	569.795	630.22	699.434	797.945	817.781	868.684
523	-0.51518	41.8432	89.5117	154.392	214.939	294.04	387.241	472.507	566.013	630.1	713.657	799.595	818.393	864.414
523.5	-1.24548	43.7985	88.9034	156.53	208.776	289.892	387.793	467.688	572.18	635.839	708.227	803.442	825.72	860.571
524	-1.48749	46.7303	92.6897	153.908	214.516	286.354	384.926	467.14	559.792	645.302	692.421	801.491	829.567	862.099
524.5	-0.44777	42.4599	90.9219	147.99	221.476	290.507	388.895	472.636	564.494	653.788	695.231	804.057	829.142	848.612
525	0.59195	42.279	89.3371	152.02	224.042	299.054	389.691	469.525	577.618	649.884	696.576	801.007	818.036	846.173
525.5	-0.38248	42.8304	90.5599	155.868	224.41	305.343	403.243	462.935	568.404	650.313	705.489	801.07	833.724	841.048
526	-0.50242	45.1519	94.041	152.024	220.933	299.485	398.484	461.717	563.768	648.667	714.768	798.997	826.097	841.905
526.5	1.88007	42.0412	100.269	156.055	218.616	296.802	404.102	458.118	567.249	646.289	709.216	791.919	831.531	847.278
527	2.73669	39.663	102.407	159.719	218.374	299.551	401.113	462.942	562.002	643.301	707.754	796.804	845.998	840.932
527.5	2.37261	40.8248	101.86	161.064	216.972	296.989	397.209	459.709	566.215	650.627	714.897	787.041	852.348	855.583
528	3.3513	41.5593	97.7727	160.273	222.712	288.63	386.225	472.712	560.419	656.305	719.172	791.864	832.148	853.754
528.5	3.10928	45.4066	103.756	160.458	224.24	290.585	374.569	482.723	550.656	647.946	716.488	789.242	832.76	852.841
529	3.47762	43.3336	103.453	156.92	219.42	291.502	383.788	482.298	553.465	647.948	725.279	788.207	834.227	850.768
529.5	1.89283	43.6409	101.624	152.222	230.347	295.594	377.076	481.202	552.674	662.842	723.817	784.18	839.722	851.929
530	1.28461	39.4926	104.19	153.811	226.016	299.93	382.144	481.692	560	666.14	723.88	792.911	834.109	848.575
530.5	1.46984	40.2882	103.276	150.151	222.478	312.261	383.001	469.854	550.908	657.232	711.553	797.795	832.952	859.746
531	0.12919	41.8162	102.302	152.595	217.964	304.45	380.439	478.462	557.807	650.947	703.987	805.671	829.78	856.635
531.5	0.86374	42.6728	99.4355	158.151	218.637	308.054	376.657	481.821	566.049	640.451	714.304	792.978	840.402	872.507
532	4.2228	46.5812	93.2121	158.276	217.846	297.802	379.772	477.917	565.563	652.782	717.297	793.774	843.822	876.659
532.5	3.91975	45.973	91.078	157.545	222.12	305.189	377.394	468.824	566.115	658.278	723.768	786.757	848.097	870.192
533	2.27393	46.0361	90.8359	158.524	221.512	300.125	364.823	455.643	569.596	656.876	722.916	791.519	850.174	857.193
533.5	1.2995	45.3058	90.6549	154.376	225.665	294.94	375.872	449.236	568.011	664.141	725.298	781.39	849.932	861.163
534	1.72887	47.3221	95.1127	155.843	223.775	295.491	378.011	460.835	561.604	657.735	714.375	775.655	837.544	865.559
534.5	1.54789	42.9908	95.6031	157.371	233.054	290.244	382.224	459.189	558.25	656.516	711.814	771.812	844.749	862.449
535	0.39035	44.6408	94.3234	149.743	223.23	297.876	384.668	454.065	559.839	651.147	714.074	781.091	831.079	859.765
535.5	1.61318	42.2016	90.7855	151.271	225.063	290.798	393.459	464.015	566.493	649.501	711.757	790.309	838.71	854.335
536	0.02839	41.3492	92.7408	157.804	221.464	290.617	403.227	472.746	564.665	645.475	714.201	785.917	833.952	853.727
536.5	1.31226	43.2434	93.8415	159.882	221.283	294.891	401.581	472.992	571.747	641.937	709.808	786.591	835.968	855.56
537	-0.63874	41.2314	92.9282	159.456	223.849	291.598	400.667	475.863	565.584	648.043	713.35	787.752	840.059	852.389
537.5	-1.36904	42.088	85.2398	157.261	212.925	294.59	404.881	457.249	569.737	648.594	712.925	780.003	828.953	851.963
538	-3.62521	44.1043	87.5613	151.953	215.43	290.747	402.136	463.233	570.838	642.859	718.115	778.357	826.392	847.388
538.5	-0.57133	43.435	91.2255	153.726	210.976	300.21	399.27	456.765	565.102	642.617	718.484	776.589	825.112	858.804
539	-0.26402	44.5358	93.9742	153.85	214.885	303.447	399.943	457.072	567.668	643.84	716.899	786.113	825.969	848.247
539.5	-0.62811	45.5755	93.4881	154.828	218.061	292.219	391.523	456.281	571.882	648.969	713.666	788.923	822.431	847.211
540	-0.93116	46.5542	90.6826	157.455	215.133	290.939	389.694	465.255	575.607	656.723	711.532	787.399	832.077	848.129
540.5	-0.31868	49.2419	91.7223	158.8	216.051	294.603	390.123	457.445	565.111	655.565	715.013	783.251	832.201	845.751
541	-1.35415	47.1688	99.659	158.192	213.917	288.258	384.51	462.879	563.587	655.628	709.4	788.197	824.818	858.814
541.5	-0.37546	51.1382	98.5015	149.222	220.145	295.462	387.076	455.984	568.96	642.447	707.205	788.26	826.895	872.427
542	-1.77714	48.76	101.861	153.13	218.01	305.84	391.35	460.564	576.531	647.698	718.682	795.464	818.169	864.067
542.5	-2.14123	48.2738	97.4071	148.921	218.562	298.335	387.446	453.12	567.012	644.77	722.834	794.123	823.603	866.633
543	-2.62738	44.0035	99.7896	151.547	225.4	293.393	388.547	470.395	572.385	642.392	711.728	801.145	831.784	868.588
543.5	-0.42799	43.0901	97.5945	152.648	224.609	295.592	391.601	477.233	570.007	649.291	718.505	793.7	833.556	880.553
544	0.48966	45.7777	91.1269	148.012	221.498	297.304	383.424	475.343	573.671	647.218	716.066	801.271	823.121	868.226
544.5	0.06454	43.3385	89.7252	142.948	222.904	305.057	392.582	468.082	564.09	641.91	716.8	798.526	815.738	853.885
545	2.2029	49.2	88.5066	145.574	222.967	308.844	390.753	466.68	565.801	633.367	713.507	790.228	825.262	863.836
545.5	0.86225	45.4179	90.2788	148.689	223.946	301.399	380.867	473.213	567.268	630.623	710.274	793.282	831.551	855.66
546	0.07092	42.1852	89.6095	151.011	223.46	301.768	384.531	474.619	564.524	623.179	705.881	790.598	840.464	859.324
546.5	1.65997	39.6238	86.9261	151.867	221.081	302.319	386.487	471.875	567.151	622.143	709.912	798.596	837.048	869.214
547	-0.59621	37.917	86.7451	149.978	227.797	307.082	381.85	476.149	561.415	620.681	709.792	799.147	835.463	860.61
547.5	-0.22787	38.9567	86.5031	143.51	232.987	307.145	384.477	475.297	561.296	628.739	696.061	797.318	842.118	852.067
548	1.2391	37.6161	87.7869	147.662	224.078	312.152	380.756	463.58	561.908	634.601	681.537	796.71	844.562	861.957
548.5	3.25539	39.2661	90.9019	150.655	217.184	302.206	381.124	476.949	568.075	640.523	689.962	801.534	835.164	860.982
549	1.42646	39.4514	94.322	148.216	214.927	310.264	384.727	473.777	565.33	645.836	693.809	811.668	842.552	863.914
549.5	0.7572	40.6132	95.1786	147.242	217.92	307.886	383.448	473.352	569.544	642.969	700.159	805.811	840.357	854.273
550	-0.27827	42.1412	91.4576	147.183	217.983	302.883	384.793	473.416	567.776	650.356	707.058	803.616	840.725	858.486
550.5	-1.74099	44.0964	90.8493	146.696	215.727	303.008	392.119	473.296	562.468	647.246	702.788	794.585	839.812	856.169
551	-2.16611	42.1454	91.2177	145.295	212.433	298.676	385.529	462.189	551.362	644.196	700.837	800.934	834.626	876.984
551.5	-1.4926	42.2696	83.8956	143.283	216.342	293.063	373.019	462.68	558.749	639.926	702.365	808.322	835.299	855.746
552	-1.49047	42.6379	86.5833	146.459	213.414	298.558	381.444	468.724	558.751	633.092	713.353	795.446	836.095	854.65
552.5	1.80756	43.3725	89.7592	141.456	222.205	295.57	393.287	477.454	555.03	644.508	723.548	795.875	837.745	851.6
553	1.74865	45.4498	90.3717	144.571	215.738	297.525	392.557	477.029	558.206	627.908	708.231	792.764	836.038	855.875
553.5	1.32353	42.8885	88.5428	143.047	216.045	299.846	394.268	487.102	562.847	639.141	712.993	786.663	845.073	856.731
554	2.18015	41.1816	91.8408	148.42	214.033	302.778	389.387	488.63	560.041	632.124	711.714	784.529	845.808	850.508
554.5	1.14468	40.3293	87.7536	145.249	212.204	304.856	392.929	481.43	573.227	638.169	704.086	785.935	844.711	855.149
555	-0.44011	37.951	87.1453	139.33	219.592	297.167	392.931	477.892	573.107	646.044	704.211	780.383	835.009	857.104
555.5	-0.56005	40.9438	87.4526	147.572	226.43	299.855	395.009	476.796	572.682	646.84	711.415	790.211	832.997	866.872
556	-0.06965	41.4343	88.3093	154.105	224.845	299.43	401.298	473.502	573.111	653.922	709.83	794.303	833.365	857.413
556.5	-0.06752	44.7933	84.222	149.163	227.044	299.981	393.487	470.391	564.508	645.745	693.17	791.436	843.866	857.171
557	-0.73678	45.6499	86.7876	145.626	227.535	301.814	381.282	469.783	562.984	657.222	701.106	777.95	837.337	843.44
557.5	-0.36844	46.4455	92.5881	150.144	232.481	308.103	382.2	472.166	559.934	655.515	691.221	788.206	828.245	843.076
558	0.24404	44.3725	93.6889	147.827	220.947	312.195	384.338	463.989	552.063	651.001	694.275	790.283	830.383	855.041
558.5	1.22272	45.2291	94.8507	150.087	217.531	303.774	394.472	459.475	563.173	651.918	682.253	788.82	830.507	849.672
559	1.10278	46.9402	92.6555	148.259	221.989	305.302	390.385	455.632	575.26	640.995	690.983	798.1	835.514	838.932
559.5	1.83733	47.0644	91.1317	149.848	215.827	301.703	385.626	469.733	569.037	642.035	700.385	793.28	844.245	840.827
560	0.43565	46.3341	99.2516	146.981	211.922	310.494	396.066	466.012	560.433	640.389	698.006	785.287	844.308	844.552
560.5	0.62088	43.7117	98.5213	142.65	217.113	310.557	401.805	466.441	560.679	636.607	696.239	787.303	847.362	853.282
561	-0.96391	46.7045	105.054	143.873	217.481	312.207	393.323	460.889	557.019	638.868	686.902	791.15	847.791	862.134
561.5	-1.5111	42.8004	100.296	143.692	224.197	309.646	392.41	459.915	554.824	639.602	690.078	785.781	850.295	859.268
562	-0.41034	39.6287	94.1941	147.661	216.081	309.404	387.712	458.452	560.259	640.581	697.893	775.896	852.983	856.645
562.5	-1.75098	40.8516	94.7456	140.339	216.694	307.148	400.959	485.004	562.092	643.696	694.294	773.456	847.492	860.432
563	-2.54231	43.2341	92.1842	145.346	224.081	309.408	383.81	482.626	563.803	655.111	684.591	777.487	846.884	861.838
563.5	-2.05191	41.7713	94.1395	141.991	223.656	312.157	393.395	475.243	557.335	658.898	692.894	782.067	833.458	862.999
564	0.26956	42.3228	92.9819	140.711	225.794	313.685	394.618	468.531	557.337	659.999	692.713	775.782	832.118	866.664
564.5	1.06514	40.9821	93.5944	143.155	233.853	311.856	389.981	464.444	558.804	659.756	704.251	778.775	830.289	856.534
565	0.02967	43.6698	92.0707	147.185	227.141	312.347	396.026	473.479	566.802	660.369	706.389	781.096	831.817	864.165
565.5	0.52008	41.7188	92.5611	143.159	220.674	316.499	385.835	460.298	554.536	658.906	704.194	780.916	832.307	860.139
566	2.23119	43.1247	93.5398	146.152	222.019	321.262	386.509	462.436	559.726	647.922	698.215	773.838	832.92	859.043
566.5	-0.33016	45.2631	94.7016	148.962	219.885	314.123	382.238	471.533	560.949	642.675	712.927	777.502	828.588	849.462
567	0.64853	46.669	93.8492	146.339	220.253	308.083	384.743	487.038	559.731	642.311	721.23	784.401	826.82	857.948
567.5	0.95583	46.1219	94.0344	147.074	219.523	298.746	370.341	491.984	558.451	640.97	721.11	782.45	835.55	850.382
568	1.44624	48.0161	93.06	144.757	207.867	300.763	370.343	488.141	563.153	648.846	712.384	782.696	825.055	851.788
568.5	-0.5658	47.1637	93.8556	147.689	210.677	307.601	374.983	496.016	564.742	656.905	704.634	790.816	828.963	837.935
569	1.45049	48.2034	92.698	146.043	207.871	310.899	370.53	485.398	557.969	655.869	708.848	793.87	828.294	836.9
569.5	1.20848	48.0224	93.6767	148.73	207.69	302.417	372.363	481.311	575.488	648.059	715.32	783.618	826.465	838.245
570	-0.43735	45.1559	92.3971	149.953	206.045	303.701	362.111	472.951	576.467	638.967	712.819	778.127	834.524	836.233
570.5	0.17513	47.9657	95.3289	156.364	212.638	305.717	350.944	474.296	565.422	638.053	704.765	782.524	838.249	845.756
571	-0.31102	46.1978	91.3027	158.136	211.664	303.949	351.923	469.721	563.532	631.952	704.645	791.925	826.288	843.439
571.5	-1.95684	48.5803	94.7228	156.368	210.69	307.186	345.516	457.882	570.126	639.584	702.206	787.716	834.713	832.15
572	-0.61194	43.7606	92.5277	153.38	216.734	308.043	357.664	461.973	576.842	645.079	697.142	784.422	824.583	839.415
572.5	-0.85396	46.9366	89.6612	152.222	215.21	301.087	367.554	459.229	572.754	639.405	697.449	783.875	828.431	836.243
573	-0.9739	44.8635	90.823	152.835	217.837	306.704	370.608	453.616	566.592	634.402	700.198	784.61	835.513	837.832
573.5	-3.65732	42.7294	93.0834	154.18	213.933	309.148	371.953	461.553	582.036	637.212	684.209	783.208	829.473	846.135
574	-0.72551	43.7691	89.3013	158.454	219.611	316.962	367.316	463.63	581.672	636.237	686.286	784.064	827.705	842.597
574.5	-0.84545	46.9451	88.2048	157.48	222.604	312.265	377.817	459.36	581.186	638.986	691.476	777.109	828.683	836.13
575	0.92669	43.8954	89.1225	158.153	224.315	306.102	383.068	459.179	579.601	639.476	689.342	784.252	828.136	836.559
575.5	1.90538	41.8224	84.2418	165.48	214.247	300.306	380.812	458.387	584.974	649.305	700.819	784.254	825.819	850.904
576	0.74784	39.2	90.1643	164.566	219.681	295.792	386.551	463.516	581.986	656.143	691.483	782.425	819.046	849.381
576.5	-0.89798	41.7046	93.6455	165.484	212.542	294.39	396.99	476.763	586.138	646.868	694.17	771.746	822.466	853.167
577	0.63003	42.5001	93.6476	161.824	216.084	283.955	386.738	469.746	583.333	650.532	697.102	766.743	816.06	833.027
577.5	3.74495	42.8685	93.4056	163.047	217.063	279.319	386.313	467.246	582.48	633.017	698.325	774.436	812.522	837.729
578	3.25879	41.2227	94.9946	160.668	215.478	279.26	388.696	475.793	578.027	639.672	693.017	778.955	806.848	843.957
578.5	1.91814	41.9572	93.8981	165.248	211.818	282.985	387.294	458.766	566.066	643.031	705.409	767.665	814.113	845.18
579	3.20201	45.0721	93.412	157.56	220.975	283.231	380.521	462.492	566.312	632.413	697.355	779.264	815.641	847.44
579.5	2.77689	47.6988	97.2593	158.417	219.452	286.59	373.871	463.531	568.573	630.279	691.437	780.426	828.583	848.358
580	0.76486	45.9919	93.5383	157.076	224.764	293.306	381.807	463.228	570.284	627.718	693.575	771.944	812.349	857.576
580.5	3.26942	50.5106	98.9115	152.5	229.222	303.074	369.419	457.249	575.169	633.946	695.774	768.101	813.084	858.494
581	3.75983	47.7051	96.2891	155.066	229.651	300.208	369.727	461.89	575.659	632.727	693.03	779.089	809.241	848.914
581.5	3.63989	48.3787	97.8782	156.96	226.296	299.233	378.579	469.704	568.398	634.316	701.943	774.636	812.6	841.897
582	2.42131	48.3808	94.0351	155.803	222.453	305.034	376.506	471.293	561.503	641.032	695.414	776.896	820.109	852.153
582.5	1.69102	51.0074	93.4879	152.814	223.554	313.52	371.564	464.704	556.867	639.325	701.947	770.978	807.538	843.305
583	0.77762	48.1409	95.8704	149.215	229.537	307.845	378.768	462.57	564.559	643.661	714.889	775.436	808.944	855.331
583.5	0.77974	47.2275	98.436	148.424	231.798	307.054	379.442	468.675	568.529	649.278	714.891	774.705	819.566	857.042
584	-1.35436	44.2389	97.2784	151.478	234.302	304.066	380.298	459.095	564.014	633.961	705.433	767.444	820.545	851.551
584.5	-2.38983	44.5462	95.3274	148.001	226.004	303.762	389.578	457.449	570.913	634.146	709.341	770.987	833.487	849.539
585	-0.9839	44.3652	92.8271	145.745	228.386	306.816	396.538	464.836	563.103	650.444	703.057	766.655	836.418	853.447
585.5	-1.71419	40.8884	92.2799	141.047	224.726	309.26	395.869	464.9	561.457	642.939	702.692	775.507	832.758	849.177
586	0.3021	43.3319	92.2821	143.185	220.639	305.295	389.706	475.522	556.393	639.401	698.361	769.894	834.042	852.658
586.5	2.68459	43.6392	88.561	146.728	216.735	302.306	391.173	474.73	558.715	646.605	697.57	760.68	826.049	858.703
587	3.78535	42.1765	91.1267	146.974	214.662	308.107	398.866	469.423	557.435	644.41	696.534	756.959	821.839	863.343
587.5	1.59021	42.3617	95.4623	152.774	218.204	308.536	387.149	469.669	559.574	649.356	695.987	763.492	835.941	860.538
588	0.24957	43.8897	90.6426	153.753	216.68	302.557	383.184	472.417	561.346	644.781	691.167	770.086	834.478	857.916
588.5	0.49583	44.4412	91.2551	149.727	217.415	297.798	390.999	463.325	558.906	648.628	690.376	773.018	839.546	862.862
589	0.7421	43.7719	88.2665	145.945	226.999	293.161	388.865	459.055	563.059	651.682	685.068	778.269	835.825	865.854
589.5	0.92733	43.2247	89.4283	149.548	223.095	285.9	383.496	471.142	568.92	649.487	689.831	778.759	831.372	854.87
590	1.66188	39.7478	86.1956	152.053	220.9	286.391	381.911	469.313	569.167	643.263	691.542	772.719	827.712	846.571
590.5	1.96918	42.3745	85.6484	150.346	221.391	285.233	378.19	472.55	571.366	647.233	698.624	769.852	824.723	847.611
591	2.76477	41.1559	85.7726	150.714	226.031	293.292	375.018	476.214	570.27	640.277	702.167	765.399	825.824	847.98
591.5	2.15654	39.388	84.9202	152.242	224.08	299.886	369.527	476.339	567.342	638.387	711.202	764.241	830.587	846.273
592	2.0366	42.3198	79.3071	149.925	214.622	302.085	369.102	468.284	555.686	639.183	711.021	772.789	834.19	848.167
592.5	1.91666	41.2233	81.9948	148.34	221.216	300.684	361.902	465.234	569.971	634.119	714.258	772.424	832.361	846.033
593	1.00326	40.432	86.9407	150.356	215.542	296.291	369.961	463.589	571.316	631.557	716.579	775.356	838.833	855.129
593.5	1.18849	38.0537	84.6235	153.227	214.201	299.345	362.761	461.699	575.956	634.184	718.229	778.044	834.562	849.821
594	0.15302	40.1311	89.8747	158.966	220.185	303.498	370.026	468.415	570.71	631.073	721.283	785.126	832.672	851.715
594.5	-0.63831	38.119	96.3465	158.969	216.891	303.073	373.751	477.999	575.472	628.207	717.196	785.372	829.562	848.849
595	-3.4438	43.3702	95.189	156.041	223.912	301.488	372.777	477.94	579.015	631.261	710.362	791.356	833.043	840.855
595.5	0.22043	40.1374	94.0315	152.564	224.83	301.612	379.005	485.938	575.66	638.221	719.031	789.71	837.257	834.51
596	-0.08262	44.6561	98.0009	149.881	222.879	306.497	385.843	482.156	575.418	630.105	723.855	791.665	833.047	840.433
596.5	1.75056	43.1324	94.4019	155.315	227.336	302.471	385.906	473.308	565.715	624.065	709.453	782.817	831.157	844.341
597	1.87476	42.8293	98.4324	148.42	217.512	297.102	393.232	476.606	570.966	633.65	716.841	802.534	845.808	837.263
597.5	0.71722	43.1367	99.1669	152.939	215.866	302.17	389.938	469.528	575.18	630.905	712.814	798.203	833.054	837.509
598	1.57384	43.566	100.451	151.964	217.455	302.904	388.415	453.783	580.248	638.293	712.328	808.459	832.69	828.112
598.5	2.06425	47.9627	98.2557	155.079	221.303	309.315	379.139	463.063	563.282	643.971	707.02	803.273	834.279	834.828
599	2.18844	47.1714	100.821	154.227	224.906	304.618	387.259	457.022	555.899	639.64	714.896	798.758	827.262	840.445
599.5	3.22817	44.9152	95.5744	152.398	221.063	306.878	381.829	464.166	559.686	639.52	703.057	792.779	829.766	848.87
600	-1.22527	43.4525	96.492	148.494	225.398	302.73	386.653	476.253	554.134	647.578	711.36	795.039	834.407	848.872
600.5	-2.50488	47.3608	94.3579	154.966	221.433	299.619	391.904	477.231	566.038	634.641	705.991	791.746	833.738	854.185
601	-0.54963	44.9216	93.2004	153.686	218.872	295.776	374.084	478.759	573.913	634.094	696.35	792.907	839.843	842.59
601.5	-0.85268	46.1444	94.3011	151.979	216.555	293.642	378.42	462.526	573.976	637.209	695.558	790.834	838.991	833.193
602	-0.42331	48.1607	94.3033	154.362	217.045	292.057	396.61	457.035	569.645	642.094	707.523	793.522	831.547	835.514
602.5	-0.84843	47.6135	90.155	155.157	218.024	287.054	394.781	461.615	567.816	646.49	711.615	788.641	837.653	834.906
603	1.2289	42.4276	91.683	157.784	219.185	300.057	383.309	464.669	574.349	640.938	709.054	789.132	837.288	842.476
603.5	3.30622	42.9791	93.15	153.88	225.779	298.777	389.659	469.92	571.788	641.062	716.563	791.148	824.229	846.141
604	1.8435	42.3708	89.7952	153.882	219.739	297.376	387.708	476.026	562.696	644.055	708.081	787.732	817.029	851.209
604.5	4.34807	44.8144	86.8676	153.152	221.45	296.645	375.015	477.554	568.069	648.147	713.088	797.012	813.247	850.234
605	4.16709	46.0982	89.067	153.642	222.124	302.324	374.528	483.415	567.522	643.815	714.494	794.45	821.794	845.72
605.5	3.25369	44.1472	85.1018	151.935	224.994	307.087	376.301	484.699	559.833	646.076	714.618	789.997	826.984	831.44
606	3.19478	40.7924	84.4326	158.529	225.18	300.985	388.143	475.973	561.849	644.491	718.466	782.186	818.197	830.16
606.5	2.03724	41.9542	89.8058	154.442	224.083	308.312	384.545	484.581	558.922	636.742	711.327	780.907	811.669	838.829
607	1.0628	40.3084	89.4417	153.162	224.207	298.792	384.974	482.874	555.628	645.594	722.987	775.843	821.619	847.498
607.5	-0.88819	40.3105	88.8945	155.118	229.458	299.588	381.07	480.496	556.546	640.652	720.73	775.54	826.748	844.266
608	0.88395	41.9606	87.4318	154.815	227.874	295.012	381.316	475.371	550.628	629.729	716.033	768.706	823.699	844.146
608.5	0.3978	43.4276	88.2884	151.216	228.059	301.484	381.44	472.871	556.428	636.445	719.636	773.591	826.02	855.622
609	2.04787	41.0493	86.7647	154.819	222.019	289.646	387.302	471.53	541.599	632.541	710.666	768.222	830.356	860.202
609.5	3.57588	42.8825	88.9641	149.572	226.415	296.362	389.074	476.11	547.643	634.191	716.1	783.788	831.823	861.181
610	2.96765	45.204	96.0463	152.992	224.708	289.284	393.654	471.718	549.049	644.02	701.82	775.306	833.351	855.934
610.5	2.96978	43.1919	96.9029	158.67	233.561	279.764	391.581	470.987	557.108	647.379	703.897	787.76	833.048	842.997
611	2.42259	44.5369	99.7737	161.297	233.563	285.382	402.081	472.759	558.27	641.4	699.261	787.274	832.562	846.661
611.5	1.44815	44.3559	100.264	159.346	231.368	288.68	400.679	459.151	556.197	638.716	701.399	789.351	833.601	848.921
612	-0.19767	45.5787	99.1065	157.273	229.172	292.71	408.127	465.745	564.133	637.009	698.777	782.883	830.552	843.43
612.5	-1.66039	46.3743	94.4089	155.993	225.268	290.515	395.74	482.592	563.159	638.171	710.803	791.736	825.366	838.427
613	-0.19341	45.4609	98.8056	152.394	230.825	287.648	402.089	481.13	569.265	641.164	709.34	788.076	816.518	836.843
613.5	-0.67957	42.2281	98.9908	157.218	228.752	292.777	406.059	471.244	564.079	641.166	707.878	788.932	820.854	834.098
614	1.94707	42.1082	98.7488	155.328	224.42	296.564	399.408	480.768	562.067	633.478	710.687	783.014	820.367	842.523
614.5	1.9492	40.4624	91.2436	153.438	226.375	295.101	400.631	474.666	557.125	646.48	716.488	779.415	814.693	852.413
615	2.01236	44.1266	90.0861	151.121	232.054	296.385	404.295	465.269	568.113	639.341	708.067	790.22	822.508	837.278
615.5	4.88314	45.0443	89.1116	151.978	227.234	301.575	405.762	466.431	570.252	638.733	703.247	788.819	818.787	841.309
616	3.29835	47.6709	95.4614	152.224	230.837	303.469	406.069	465.151	567.935	646.365	705.142	786.868	827.456	824.526
616.5	4.82635	48.4055	90.7028	150.517	224.98	308.232	407.048	470.647	567.692	641.484	712.712	789.372	828.679	840.703
617	2.32604	48.2245	88.9349	149.787	230.109	312.263	396.43	457.343	574.042	637.458	708.076	786.872	833.076	847.541
617.5	0.37504	46.0293	89.0591	145.028	227.304	311.227	402.841	460.397	561.837	633.615	704.293	789.193	835.031	841.928
618	-0.72146	44.2004	91.3806	153.27	221.996	308.055	402.843	472.484	558.483	634.166	694.835	794.872	835.582	838.512
618.5	-2.24522	46.8881	87.5375	154.859	225.416	309.95	404.554	474.439	560.926	633.497	696.302	795.057	843.702	849.012
619	-0.41203	47.6226	87.6007	153.641	227.92	302.444	409.256	473.099	558.792	637.344	701.98	795.242	837.234	844.925
619.5	-1.08129	-7.12377	-15.3635	-21.7722	-29.8899	-43.4397	-55.4026	-74.3845	-96.7234	-116.865	-147.871	-184.98	-230.085	-258.528
620	0.87396	-5.53473	-11.6993	-16.46	-22.8687	-34.8316	-42.4	-58.8795	-78.96	-94.4019	-120.647	-152.752	-188.884	-211.345
620.5	3.37852	-4.18983	-11.7582	-16.3358	-23.7211	-34.7684	-40.5057	-55.1542	-73.0985	-89.8221	-114.541	-140.725	-177.347	-193.948
621	2.52616	-6.32393	-10.9016	-18.7141	-22.2541	-33.7897	-40.9919	-56.739	-71.9978	-85.9138	-110.267	-134.254	-167.518	-183.814
621.5	0.33102	-6.74905	-11.7539	-19.0171	-21.3365	-33.6656	-41.9663	-54.8447	-71.3242	-85.8506	-107.213	-131.871	-161.534	-176.305
622	1.43178	-6.31968	-11.3856	-19.9305	-20.8461	-33.7855	-41.9642	-53.1947	-67.9042	-82.8578	-105.075	-128.085	-156.466	-170.748
622.5	-0.39715	-6.86687	-12.7873	-18.3415	-21.027	-30.9758	-40.6193	-52.1549	-66.8644	-81.6349	-101.593	-124.237	-152.069	-163.3
623	-0.15088	-7.23096	-11.8086	-18.7666	-20.7197	-31.1567	-41.5938	-52.0918	-66.8623	-81.4497	-98.8447	-120.756	-146.391	-157.622
623.5	0.21746	-3.93293	-11.3182	-18.9476	-22.3655	-33.1688	-40.432	-53.0662	-65.7615	-81.2034	-94.6922	-117.397	-141.384	-150.784
624	1.07408	-5.70082	-12.0485	-19.5558	-22.2414	-31.8849	-39.1481	-51.3551	-64.2946	-77.173	-94.4459	-116.663	-139.49	-148.523
624.5	0.16068	-6.73629	-11.9853	-17.9668	-23.3989	-29.8686	-40.1836	-51.1699	-65.6352	-77.354	-93.1621	-117.881	-135.643	-145.347
625	0.52901	-5.63553	-10.3963	-18.2088	-22.6643	-30.6599	-38.2283	-50.4353	-63.68	-75.887	-91.2068	-114.461	-132.222	-142.598
625.5	-0.44542	-4.90099	-10.8214	-18.5729	-21.9298	-30.2916	-37.6158	-50.8605	-63.1285	-73.9928	-90.5333	-112.75	-132.525	-140.46
626	0.28913	-5.50921	-12.9555	-16.1904	-24.186	-29.8012	-37.0644	-49.0273	-62.0278	-75.5776	-88.3339	-113.48	-129.716	-136.185
626.5	0.16918	-6.72779	-12.7092	-19.301	-23.5125	-28.7615	-39.1985	-49.1472	-63.1853	-73.9275	-87.5994	-109.633	-125.99	-135.085
627	2.18547	-5.44392	-14.172	-18.7496	-23.2051	-29.98	-37.6095	-48.7789	-62.878	-72.0943	-86.4986	-106.152	-126.843	-130.993
627.5	3.77451	-2.75625	-13.3764	-16.4892	-22.2265	-28.2689	-37.8515	-48.5326	-61.35	-71.787	-85.3978	-106.089	-122.812	-130.747
628	4.08181	-3.85275	-14.2898	-17.1584	-23.2619	-28.8161	-37.6052	-48.0422	-61.8972	-72.3342	-85.1516	-104.561	-120.796	-128.609
628.5	4.93843	-5.98686	-14.7149	-18.0718	-22.9546	-29.1802	-37.42	-46.5142	-60.003	-71.6607	-84.6001	-103.46	-117.864	-126.653
629	3.23157	-4.94713	-13.9803	-19.7787	-22.1591	-28.6898	-36.6244	-46.5731	-59.7567	-69.8275	-82.6449	-100.955	-117.862	-124.332
629.5	1.70782	-4.39569	-11.4147	-17.7014	-20.9362	-29.9694	-39.2468	-45.5334	-60.8532	-67.6891	-81.4831	-99.1222	-117.433	-124.696
630	-0.67042	-2.56251	-11.0464	-17.9434	-22.6431	-26.9766	-37.6577	-46.3247	-59.02	-67.1377	-83.0068	-98.2046	-115.844	-124.755
630.5	0.67448	-5.49007	-12.9364	-17.0257	-21.5423	-28.0731	-36.8011	-47.4212	-56.8206	-66.5863	-81.9061	-99.4232	-115.597	-122.8
631	1.77524	-7.62417	-13.8498	-15.925	-19.465	-27.5216	-36.1276	-47.236	-56.0861	-66.8893	-81.3546	-99.7873	-112.422	-122.92
631.5	1.04494	-5.05857	-11.5893	-14.2138	-19.4629	-27.7026	-35.4541	-45.2807	-55.6567	-65.4834	-81.4135	-99.541	-114.128	-120.964
632	2.69502	-5.05644	-11.8314	-15.0052	-20.3152	-27.9446	-34.1092	-45.889	-57.3025	-65.4202	-81.7776	-97.8909	-114.126	-120.047
632.5	3.4906	-7.37365	-10.2423	-12.3175	-19.8859	-26.4166	-34.9615	-46.0089	-55.2863	-65.8453	-80.4938	-98.316	-109.913	-118.58
633	2.51617	-7.06635	-10.3012	-13.7802	-20.6162	-27.0859	-34.7763	-46.0678	-53.27	-65.8432	-78.2944	-96.4828	-109.178	-116.685
633.5	1.60276	-6.3318	-8.10182	-14.5716	-21.7737	-29.281	-36.3611	-44.5398	-53.2068	-64.0711	-79.4519	-96.2976	-105.88	-116.927

## Sheet: adr-2(gv42) trace
step volt	-60	-50	-40	-30	-20	-10	0	10	20	30	40	50	60	70
time(ms)
0.5	-8.01679	-0.44843	0.07037	-0.0517	-0.90619	-3.13398	-1.7912	-2.92035	-3.80536	-4.65986	-3.68329	-4.50727	-6.06366	-2.1269
1	-9.0849	-0.63154	0.10089	-0.84516	-0.69257	-3.46967	-2.06586	-3.04242	-2.49311	-3.40863	-3.98847	-3.07294	-6.36884	-2.79828
1.5	-7.22333	0.25347	0.77227	0.28399	-0.78412	-3.31708	-1.97431	-2.15741	-2.03534	-3.98847	-3.28656	-4.20209	-7.07074	-1.57758
2	-8.77973	0.25347	0.25347	0.00933	-1.54706	-2.95087	-2.24897	-2.34052	-2.00483	-4.29364	-3.43915	-4.50727	-7.19281	-1.51654
2.5	-8.07782	0.28399	0.03985	-0.26532	-1.57758	-2.8288	-1.02826	-2.31	-2.79828	-4.50727	-2.8288	-3.56122	-6.58246	-1.18085
3	-9.02387	-0.87568	0.49762	0.55865	-0.69257	-3.65278	-1.94379	-2.70673	-2.34052	-4.08002	-3.74433	-3.77485	-6.70453	-1.54706
3.5	-7.6811	-0.11274	1.13848	-0.69257	-0.69257	-3.3476	-1.69965	-2.98139	-2.34052	-3.43915	-3.04242	-3.62226	-6.00263	-2.09638
4	-7.25385	-0.93671	-0.50946	-0.38739	-0.90619	-3.8664	-1.88276	-2.8288	-1.69965	-3.22553	-3.62226	-2.76777	-5.6059	-1.66913
4.5	-5.91108	0.19244	0.49762	0.1314	-1.33344	-3.83588	-1.73017	-2.58466	-3.5307	-2.52362	-3.83588	-2.21845	-6.27729	-1.48603
5	-6.76557	1.01641	-0.32636	0.25347	-0.90619	-2.55414	-1.97431	-2.67621	-2.24897	-3.80536	-3.74433	-2.98139	-5.36176	-1.7912
5.5	-5.94159	-5.63642	-0.08222	0.68072	-1.30292	-3.59174	-1.0893	-2.27948	-2.27948	-4.35468	-2.85932	-2.55414	-4.75141	-1.73017
6	-5.6059	-8.68818	0.19244	0.71124	-0.44843	-3.31708	-1.30292	-1.85224	-2.27948	-3.01191	-3.13398	-2.92035	-4.75141	-1.7912
6.5	-6.49091	-8.77973	0.07037	0.37554	-0.50946	-2.46259	-0.87568	-2.79828	-1.30292	-3.56122	-2.00483	-3.31708	-2.76777	-1.21137
7	-4.93451	-7.77265	0.1314	0.77227	-0.5705	-2.15741	-1.45551	-2.70673	-0.78412	-3.04242	-2.18793	-3.40863	-4.53779	-2.70673
7.5	-5.20917	-8.44403	0.28399	0.31451	0.07037	-1.69965	-1.94379	-1.45551	-1.48603	-4.29364	-2.58466	-3.31708	-3.77485	-1.57758
8	-5.36176	-9.4206	0.1314	0.25347	0.16192	-2.58466	-0.87568	-2.8288	-1.0893	-2.43207	-2.1269	-2.40155	-4.69037	-2.76777
8.5	-4.904	-9.75629	1.23004	0.03985	-1.76069	-2.21845	-0.93671	-2.64569	-1.18085	-2.43207	-2.73725	-3.74433	-5.51435	-1.76069
9	-4.08002	-7.95575	0.10089	0.4671	-0.99775	-2.58466	-2.34052	-2.06586	-2.00483	-2.27948	-3.31708	-3.56122	-5.0871	-1.82172
9.5	-4.47675	-6.97919	-0.02118	0.86383	-1.2724	-3.01191	-1.6081	-3.28656	-2.49311	-2.8288	-3.40863	-2.67621	-5.51435	-2.09638
10	-5.6059	-7.00971	-0.14325	0.95538	-1.05878	-3.37812	-1.94379	-2.15741	-2.27948	-2.55414	-3.10346	-3.10346	-4.47675	-0.96723
10.5	-5.23969	-7.22333	-0.44843	0.4671	-1.30292	-3.83588	-2.49311	-2.09638	-1.6081	-3.3476	-3.50019	-3.19501	-3.56122	-1.76069
11	-5.85004	-6.03315	0.31451	-0.41791	-1.33344	-3.59174	-2.27948	-2.52362	-2.98139	-3.40863	-4.08002	-3.3476	-4.87348	-1.6081
11.5	-5.42279	-7.49799	0.34503	-0.72309	-1.94379	-3.46967	-2.31	-3.31708	-2.58466	-4.84296	-4.23261	-3.65278	-5.20917	-1.48603
12	-5.42279	-6.61298	-0.0517	-0.41791	-1.7912	-2.79828	-2.73725	-2.43207	-2.70673	-4.17157	-4.26313	-4.0495	-5.05658	-1.6081
12.5	-6.8266	-6.58246	0.1314	-0.20429	-2.24897	-3.92743	-3.10346	-3.3476	-1.94379	-3.80536	-4.35468	-3.31708	-4.53779	-1.21137
13	-5.88056	-6.88764	-0.63154	-0.14325	-1.85224	-3.95795	-2.43207	-2.64569	-3.07294	-4.35468	-3.89692	-2.95087	-4.99555	-1.36396
13.5	-5.39228	-7.98627	-0.87568	-0.17377	-2.03534	-3.10346	-2.40155	-2.8288	-2.06586	-3.3476	-3.65278	-3.8664	-4.47675	-2.55414
14	-5.6059	-5.39228	0.00933	-0.29584	-1.18085	-2.98139	-2.64569	-3.3476	-3.25605	-3.89692	-3.68329	-2.8288	-4.59882	-1.21137
14.5	-5.48383	-6.33832	0.22296	-0.53998	-0.78412	-3.28656	-1.97431	-3.19501	-1.54706	-3.77485	-3.74433	-3.5307	-5.57538	-1.15033
15	-4.01899	-6.15522	0.34503	-0.96723	-0.02118	-2.67621	-2.21845	-3.25605	-2.24897	-4.0495	-3.71381	-3.25605	-4.99555	-1.54706
15.5	-5.36176	-5.91108	-0.32636	0.10089	-1.24189	-3.04242	-2.34052	-4.3852	-1.91327	-3.19501	-3.65278	-3.16449	-5.11762	-1.48603
16	-6.52143	-6.58246	0.19244	0.03985	-1.18085	-2.64569	-1.45551	-3.71381	-1.69965	-3.77485	-3.89692	-3.3476	-4.62934	-1.0893
16.5	-6.61298	6.81475	23.9962	35.4708	47.0064	57.6876	69.3147	81.4302	92.7828	107.492	115.61	122.263	132.944	141.245
17	-5.97211	0.16192	9.77496	14.8714	19.6321	23.9656	29.1841	34.0975	41.0555	49.1426	55.1241	62.0211	69.0401	78.7752
17.5	-5.51435	0.4671	8.21856	11.3619	14.6273	17.5875	20.5477	27.6888	34.5552	47.9219	52.7742	61.4717	59.7017	67.4227
18	-4.50727	1.10797	6.78424	9.68341	12.3384	15.7869	18.7776	27.0174	35.3487	39.0413	47.7083	55.0936	50.3939	62.1431
18.5	-4.47675	0.6502	5.80767	8.70684	11.7891	13.8338	18.1673	24.637	33.7618	33.8533	47.5252	54.3001	46.4266	60.3426
19	-3.59174	0.19244	4.73956	8.12701	11.3008	13.1319	17.4959	27.5362	28.3602	33.5176	40.5367	46.9759	47.8304	57.1688
19.5	-3.83588	-2.40155	5.31939	7.33355	10.5379	12.1248	17.0687	22.5923	27.9024	34.128	37.2408	47.4337	43.3443	58.6946
20	-5.20917	-1.45551	4.15972	6.96734	9.34771	12.9793	16.2142	21.5242	27.1395	31.4119	40.6282	49.9056	45.1448	58.6641
20.5	-2.15741	-0.84516	4.86163	7.54717	8.34063	14.0779	15.5428	23.0806	25.9493	30.2523	38.7056	46.6707	44.626	60.7393
21	-1.18085	-0.81464	4.37335	6.99786	8.09649	11.7281	15.3597	23.0501	24.8812	32.358	38.4615	45.1754	52.0113	59.9764
21.5	-1.51654	-0.38739	4.40386	6.5401	9.37823	12.0638	16.4583	22.5618	25.4	38.1868	37.1797	46.7012	52.1944	62.6924
22	-1.33344	-0.14325	4.15972	5.99078	8.37115	10.782	15.5733	22.4703	25.0948	34.0059	38.2173	51.1568	48.105	72.0613
22.5	-1.42499	0.19244	4.67852	6.38751	8.06597	12.9488	12.6436	21.7379	23.691	31.534	41.2996	51.1568	43.68	64.7982
23	-1.66913	-0.14325	3.97662	6.90631	8.00494	13.1929	14.8409	22.5923	24.4234	32.358	40.8113	53.2625	48.0745	63.2112
23.5	-1.18085	-1.05878	3.97662	6.29595	8.82891	11.3008	14.3526	19.2964	26.346	31.9612	50.0276	45.6636	50.7296	67.9415
24	-0.41791	-0.81464	4.25128	5.80767	9.13409	11.2703	13.4371	19.4185	24.8506	32.7852	50.9126	47.0369	53.293	68.3077
24.5	-2.03534	-1.45551	4.09869	6.23492	8.21856	8.64581	13.6202	18.3199	23.1722	32.5716	50.2107	48.2881	51.0958	66.6902
25	-1.05878	-0.99775	4.00714	5.59405	8.2796	10.782	13.8643	18.8692	22.7449	30.649	50.7601	46.5486	51.8282	65.8052
25.5	-1.82172	-1.11982	3.91558	4.9837	7.08941	10.8126	12.5215	21.921	24.0877	29.2452	55.4903	48.7764	52.4996	73.221
26	-1.21137	-1.48603	3.00006	5.38043	6.90631	10.5379	13.0709	23.0806	21.5547	36.1116	57.9317	57.9317	56.4058	74.045
26.5	-0.93671	-1.30292	3.2442	5.13629	7.11993	11.545	12.6436	22.4703	21.8294	38.492	63.608	60.7088	53.7508	71.7256
27	-2.46259	-1.0893	3.67144	5.59405	6.26544	10.5989	12.8267	21.4937	21.7989	41.7269	59.5796	51.9197	54.5137	83.2613
27.5	-2.98139	0.28399	2.66436	4.37335	6.05181	8.95098	12.4605	22.5618	21.0054	38.1258	58.9083	49.753	53.5372	88.9986
28	-2.49311	-1.42499	3.06109	5.25836	5.62457	8.37115	13.7728	18.9608	20.5477	43.5579	67.8194	53.8423	50.2107	84.1158
28.5	-2.67621	-1.45551	2.84747	4.77008	5.62457	9.07305	15.4207	15.9395	19.9678	46.9454	63.3943	56.9246	63.2112	86.191
29	-1.82172	-1.15033	2.81695	4.52594	6.90631	10.5684	14.9629	16.2752	21.7073	45.0228	65.1338	57.1382	64.2183	86.6487
29.5	-2.46259	-2.18793	2.7254	4.89215	6.0213	9.92755	14.5357	18.8692	21.5547	43.9241	64.493	58.0232	62.7229	84.5735
30	-1.54706	-1.2724	3.12213	5.38043	4.9837	8.24908	15.9395	18.1673	19.7237	43.2222	63.3028	57.0772	64.8592	81.7049
30.5	-1.18085	-0.5705	2.87799	5.38043	6.23492	9.04254	14.3526	17.4044	20.4866	39.1024	59.1829	68.6128	68.6434	88.2356
31	-1.11982	-0.87568	2.51178	4.40386	6.41803	10.9041	14.7188	19.8763	21.7684	39.9568	61.5022	71.9087	73.6482	87.6558
31.5	-1.21137	-1.24189	2.81695	5.04473	5.44146	10.2327	15.2376	19.2659	19.9983	37.1187	62.9061	70.566	73.9229	82.4983
32	-1.42499	-3.22553	3.21368	4.67852	5.89923	8.67633	16.2752	17.8011	21.5853	36.1116	68.4908	69.4673	74.9605	82.2847
32.5	-1.42499	-1.94379	2.69488	5.22784	5.1668	10.2632	15.2071	16.5499	20.3035	31.0457	66.9344	73.9534	69.5589	80.3011
33	-1.54706	-0.93671	2.3897	4.89215	6.14337	9.46978	11.7281	18.6861	21.0665	32.5106	61.9295	82.4983	73.0379	71.2679
33.5	-0.38739	-0.93671	3.48834	4.19024	5.41094	12.3384	13.9253	17.7095	25.2779	27.9634	70.4134	81.3387	66.8123	80.6368
34	-1.05878	-0.41791	3.18316	5.56353	5.92974	11.5755	12.0027	16.5193	22.6229	35.3182	73.0074	72.6717	71.6951	85.9468
34.5	-0.41791	-1.24189	2.78643	4.49542	6.14337	11.1788	12.8572	15.8785	23.4774	35.6539	59.1524	72.8243	73.9839	85.8553
35	0.22296	-0.87568	2.32867	3.88507	5.83819	11.6365	12.1248	15.3597	23.6299	35.5013	61.1666	82.5289	70.6575	94.0035
35.5	-0.66205	-1.2724	2.66436	4.83111	5.77716	11.0872	12.5521	17.2518	21.7379	29.8555	62.0516	80.2706	68.6739	97.7571
36	-0.02118	-2.27948	2.3897	4.61749	6.57061	10.0191	11.1483	15.3292	21.6768	31.2899	65.439	73.8008	72.7327	107.584
36.5	-0.29584	-0.11274	2.3897	4.73956	5.96026	10.4158	11.8196	16.5193	19.5711	36.4168	76.0286	69.3758	68.3992	85.8247
37	-0.47895	-0.84516	2.29815	4.89215	5.6856	11.0262	13.1319	17.6485	22.9585	38.2479	66.263	66.202	68.1246	87.5337
37.5	-0.78412	0.07037	2.87799	3.9461	5.38043	12.2164	16.0311	16.3973	24.6675	40.8419	65.0118	63.1807	73.7398	97.513
38	-0.14325	-0.35688	2.93902	4.34283	6.78424	9.53082	16.4888	18.503	29.0315	41.8794	64.1878	70.0777	71.9393	98.0623
38.5	0.43658	-0.69257	2.84747	4.92266	6.57061	9.71392	15.4512	15.848	29.6419	38.0953	70.1387	79.8433	73.6482	98.1539
39	0.71124	0.03985	3.12213	4.92266	5.83819	11.1177	14.5967	18.3809	31.5645	36.1116	62.845	75.7845	75.9981	92.5081
39.5	0.80279	-0.08222	2.57281	6.0213	7.05889	9.95806	15.6038	18.2894	35.3182	33.1514	65.1949	73.8313	75.4488	96.9026
40	0.61969	-0.53998	2.23712	4.22076	6.99786	9.28668	13.6202	18.9913	31.1678	32.4495	68.9791	64.7676	77.2493	99.0694
40.5	0.00933	0.1314	3.06109	5.5025	6.38751	9.43927	12.9793	17.3433	32.8157	36.5084	71.0848	73.7093	88.3272	93.7593
41	0.22296	-0.50946	2.66436	4.64801	7.18096	10.0801	11.3924	18.0147	31.1067	40.3841	63.8216	71.4205	78.1648	92.1419
41.5	0.1314	-0.44843	2.96954	4.15972	6.29595	9.28668	11.545	16.0005	28.879	42.5203	69.8946	70.4744	74.1365	100.748
42	0.83331	-0.08222	2.87799	4.64801	6.81475	8.67633	11.0262	17.0992	26.8648	46.4266	53.5982	75.4183	72.4275	116.129
42.5	0.10089	-0.02118	1.87091	4.31231	5.86871	8.24908	12.5215	17.0076	23.2332	43.3443	53.5982	76.4864	78.47	115.763
43	0.07037	0.25347	1.62677	4.31231	5.77716	10.4464	12.0333	17.5569	19.7847	42.6729	51.4925	88.1441	82.0711	111.734
43.5	-0.26532	0.07037	2.11505	3.48834	5.53302	10.8736	13.1319	17.7706	19.9678	42.4898	59.6712	77.4324	79.2024	109.018
44	0.07037	0.1314	2.02349	3.15264	7.11993	10.1412	13.2845	19.0218	19.5711	36.4168	58.8167	79.5992	83.1087	105.6
44.5	0.37554	0.77227	2.17608	4.09869	5.96026	9.92755	12.6741	20.2425	21.3411	29.7029	58.8472	79.3245	78.7447	107.919
45	-0.5705	0.71124	2.75592	3.48834	6.66217	7.9439	12.4605	20.334	23.1111	33.9144	64.1573	80.0569	75.9676	102.823
45.5	-0.0517	0.68072	1.44366	4.09869	5.13629	7.48614	10.2938	18.3504	25.1253	35.1961	61.075	78.2869	75.9981	108.53
46	-0.14325	0.43658	1.169	4.15972	4.28179	7.97442	9.86651	18.0757	25.522	32.1443	62.2041	76.9136	78.409	109.903
46.5	0.61969	0.25347	2.51178	3.51886	4.86163	8.37115	9.98858	15.9395	19.1133	33.3345	64.2488	67.8194	82.4983	114.267
47	0.80279	0.86383	3.06109	3.21368	5.13629	9.40875	10.8736	16.1531	23.9351	32.8768	56.5889	74.93	81.064	106.272
47.5	-0.08222	0.61969	2.26763	3.61041	5.10577	9.59185	10.782	15.8174	21.5242	35.9285	61.7159	77.1883	94.2171	101.114
48	-0.02118	0.83331	2.42022	4.25128	5.56353	9.37823	11.8501	16.7024	20.9139	36.9966	49.6919	82.3457	92.5386	107.553
48.5	-0.63154	0.71124	2.02349	4.52594	5.47198	8.64581	12.2774	14.8714	20.8528	37.4239	65.8663	75.0826	97.0552	115.946
49	0.03985	0.80279	2.7254	3.91558	5.86871	7.60821	12.2469	17.1907	19.6016	42.8865	64.2793	72.8243	89.6089	119.333
49.5	-0.23481	1.01641	1.56573	4.09869	5.01422	8.52374	13.0403	20.5172	20.7003	46.8233	59.1524	85.1534	99.8934	124.521
50	-0.0517	0.34503	2.48126	4.49542	5.65509	9.10357	12.3995	18.1063	21.4021	46.6097	60.1595	77.7986	97.3299	119.638
50.5	0.25347	0.92486	2.75592	4.64801	4.70904	8.64581	13.0403	17.8621	22.6839	44.2903	58.8167	75.2046	87.7168	117.044
51	0.74176	0.86383	1.87091	4.19024	5.44146	8.52374	15.6038	17.9231	24.2708	42.3677	62.3873	79.7823	80.5452	112.406
51.5	0.40606	1.35211	2.3897	3.763	5.19732	8.09649	14.261	17.3738	28.1771	34.5857	62.6619	79.5992	89.8531	126.505
52	0.25347	1.19952	2.57281	4.22076	4.92266	8.88995	15.1766	17.2213	28.2076	34.7383	63.5164	80.3011	89.731	120.249
52.5	-0.08222	0.61969	1.5047	4.49542	5.38043	8.34063	15.9395	20.0899	30.1607	38.0342	64.4625	81.7354	86.0384	117.533
53	0.37554	1.32159	1.99298	5.28887	5.04473	8.70684	15.6038	19.7542	29.3062	40.2925	70.0777	81.9795	85.2449	120.096
53.5	-1.21137	1.26055	2.51178	4.4649	5.01422	8.76788	14.2	19.2354	29.8555	32.419	77.0662	84.3294	75.5098	116.831
54	-1.42499	1.38262	2.45074	4.34283	4.77008	9.80548	14.0169	22.1956	30.4659	32.0528	84.6041	86.4656	77.6155	127.908
54.5	-1.51654	0.4671	2.57281	5.47198	5.38043	9.16461	14.0474	22.1956	22.8365	29.825	78.5005	70.7185	90.0057	121.561
55	-0.38739	1.65728	2.54229	5.34991	5.47198	9.56134	13.8033	26.6817	28.6653	31.1983	70.1997	68.5518	99.7408	118.967
55.5	-0.0517	0.83331	3.57989	6.0213	5.38043	9.5003	14.7188	22.5923	26.285	26.6817	60.9834	77.7681	98.7947	102.182
56	-0.90619	1.29107	3.67144	5.62457	5.53302	9.28668	15.7259	24.9422	26.9564	30.1607	49.5394	76.4559	98.3064	134.287
56.5	0.37554	1.169	3.2442	5.19732	4.70904	8.61529	14.8104	22.1041	22.9585	28.4212	55.826	79.0499	89.731	125.833
57	-0.50946	0.58917	2.9085	5.96026	5.83819	9.53082	13.1319	20.5477	26.6207	29.2146	61.2886	70.8406	92.264	126.169
57.5	0.16192	0.77227	3.2442	6.47906	5.77716	9.95806	13.5897	17.8011	28.4517	29.0926	64.4625	66.9039	98.3675	119.791
58	-0.50946	1.47418	3.21368	5.65509	5.41094	8.52374	15.1461	16.5499	32.6021	31.5035	64.4014	76.7305	93.6983	112.161
58.5	-0.32636	1.10797	3.09161	5.22784	6.23492	8.00494	16.8245	17.0992	28.5738	36.1727	74.167	79.4771	91.2264	122.171
59	-0.38739	0.71124	2.54229	4.40386	5.80767	8.95098	16.6414	16.2142	26.3155	42.4593	63.3333	87.5643	89.1817	123.3
59.5	-0.20429	0.95538	2.75592	4.22076	5.53302	9.28668	13.8338	17.8621	29.2757	46.3961	64.3099	88.6324	98.8558	121.683
60	-0.26532	1.04693	2.87799	4.34283	5.1668	7.33355	13.7422	19.1744	25.0338	38.7056	80.24	89.8531	98.0318	125.559
60.5	-0.81464	0.83331	2.66436	3.70196	4.92266	7.54717	13.5591	20.7003	26.8953	41.5438	74.4722	86.9844	93.0269	126.993
61	-0.08222	-0.14325	2.45074	4.03765	4.73956	7.73028	15.3597	18.8387	29.4283	39.5296	71.1763	72.6106	98.5201	130.899
61.5	-0.41791	0.80279	2.66436	3.82403	3.763	7.02838	14.261	17.0687	32.8157	45.3584	70.2913	78.1648	107.645	130.808
62	-0.02118	0.49762	1.65728	4.31231	4.40386	7.88287	14.0779	17.5569	37.0271	46.0298	62.2957	78.1648	100.534	124.521
62.5	-0.78412	0.52813	2.17608	4.28179	5.1668	9.10357	10.6905	19.6932	33.304	47.0674	60.4952	82.4068	103.281	130.289
63	0.16192	0.31451	2.78643	3.9461	6.50958	8.9815	12.4605	20.6392	29.2146	49.3563	67.8499	83.3223	105.509	126.718
63.5	-0.11274	1.10797	2.48126	3.97662	5.86871	8.70684	13.3455	20.1204	31.7476	55.1241	76.2422	95.7735	92.264	131.662
64	-0.08222	0.71124	2.23712	4.77008	5.65509	7.60821	12.5521	20.273	28.7264	54.7274	67.6363	100.412	91.0127	122.659
64.5	-0.53998	1.5047	2.3897	3.82403	5.38043	7.33355	13.9253	19.1439	29.1841	50.5159	74.5943	98.0928	87.9305	131.815
65	-0.99775	1.01641	1.96246	3.57989	5.10577	7.15045	15.2681	23.0501	29.1536	51.8892	76.2117	88.2662	83.0477	133.92
65.5	-0.08222	1.13848	2.3897	3.51886	5.28887	9.68341	14.5662	16.5804	29.764	49.1731	72.8548	92.9659	80.6978	122.537
66	-0.93671	1.23004	2.81695	4.43438	4.70904	8.92047	13.1319	16.2752	27.7803	45.1754	65.5916	85.2144	88.022	120.188
66.5	0.22296	1.59625	2.48126	3.79351	5.1668	9.83599	12.5215	19.7847	28.5128	44.3514	59.6407	85.9163	71.8477	114.877
67	-0.17377	0.6502	2.45074	4.09869	4.58697	8.09649	12.4605	20.5782	31.4119	46.0298	61.3802	89.4563	82.3457	109.934
67.5	-0.14325	1.6878	2.48126	3.61041	4.86163	7.9439	14.9935	18.9302	27.5972	55.1851	64.3404	82.8035	82.3457	115.885
68	-0.32636	1.41314	2.57281	3.97662	5.77716	8.82891	14.6883	21.5853	26.3765	50.3633	62.1431	94.3086	74.93	116.586
68.5	-0.38739	0.58917	2.81695	5.13629	4.4649	8.49322	12.7962	15.5123	28.2076	50.6685	54.6053	80.0569	84.5125	134.409
69	0.40606	1.26055	2.66436	4.25128	6.47906	7.15045	11.3314	15.6343	24.1182	50.6075	56.6805	78.7447	91.4705	135.477
69.5	-0.08222	0.92486	2.17608	4.12921	7.51666	7.63873	10.66	15.9395	21.982	48.2271	67.3616	90.3719	100.717	134.836
70	-0.20429	1.35211	2.96954	4.37335	5.6856	8.55426	13.2845	17.1297	23.9962	47.8609	61.6548	83.4749	97.7266	135.752
70.5	-0.81464	0.61969	3.06109	3.82403	5.07525	8.2796	13.9253	17.7401	26.1629	47.3726	63.1502	81.2776	92.0503	136.179
71	0.25347	0.89434	3.06109	3.85455	4.86163	8.88995	12.2774	18.2894	26.407	46.2129	64.9507	82.2237	101.541	143.564
71.5	0.1314	0.07037	2.93902	3.9461	5.71612	7.60821	10.6295	17.7095	19.5711	38.1868	66.4461	81.7659	100.961	136.423
72	0.83331	1.32159	3.51886	4.00714	5.56353	7.91339	12.3079	20.6392	21.5547	36.722	71.2679	80.8809	95.9261	124.063
72.5	0.61969	1.71832	3.18316	4.00714	5.56353	8.40167	12.5826	20.6087	20.7003	42.1846	75.0215	79.8128	96.3838	124.491
73	0.49762	0.37554	3.27471	4.19024	5.5025	8.18804	12.6131	18.7166	20.273	46.0604	76.8221	80.5147	101.236	119.638
73.5	1.19952	1.13848	3.97662	4.77008	7.36407	7.27252	13.1624	19.9983	19.2049	45.1448	73.1905	90.4329	96.1702	128.458
74	0.25347	0.89434	3.57989	3.82403	5.77716	9.92755	11.8807	18.7776	20.2425	47.0674	70.9322	90.4329	97.7876	132.334
74.5	0.28399	1.56573	3.45782	4.80059	5.31939	7.82183	11.3008	19.388	23.8741	51.2483	75.754	89.67	95.0105	120.676
75	-0.08222	0.34503	2.66436	4.70904	5.44146	8.64581	11.2398	15.848	25.7051	51.2789	71.3899	82.9866	98.398	108.988
75.5	-0.14325	0.86383	2.81695	4.09869	5.44146	9.95806	10.5684	18.6556	25.9188	45.0228	73.4346	87.4422	98.8252	130.228
76	0.16192	0.95538	2.87799	3.79351	5.38043	9.01202	11.4229	19.7237	25.1558	38.4615	67.8804	91.2264	97.0552	134.226
76.5	-0.0517	0.71124	2.42022	3.4273	4.70904	9.56134	15.3292	16.9771	23.9046	42.8255	68.4908	100.717	100.26	113.718
77	-0.84516	0.43658	2.45074	3.763	5.07525	10.2327	14.3526	16.9161	21.4021	44.1988	74.7774	93.0574	96.8111	123.514
77.5	0.25347	0.55865	3.27471	3.91558	4.9837	9.04254	11.9722	21.982	23.9351	42.6424	68.3382	69.6199	107.523	124.765
78	0.1314	1.23004	3.27471	4.4649	4.06817	7.91339	10.5684	20.4256	21.4632	43.5884	69.6504	77.2188	108.896	137.155
78.5	-0.02118	-0.11274	2.2066	4.40386	5.38043	8.24908	10.5074	20.0594	24.8506	43.1001	67.3616	76.1812	103.678	149.088
79	-0.41791	0.49762	2.02349	3.51886	5.10577	7.51666	11.4229	22.0125	26.4986	45.7247	73.9229	92.2029	94.7664	123.27
79.5	0.03985	0.77227	1.84039	3.57989	3.97662	7.30303	9.68341	19.9678	25.7662	44.1377	68.5518	93.1184	83.0782	132.334
80	-0.38739	1.10797	2.63385	3.67144	4.52594	7.97442	11.8196	17.7095	24.4234	51.0347	69.803	86.9539	79.0499	136.484
80.5	0.4671	-0.0517	2.87799	3.15264	4.52594	7.4251	11.3924	17.0381	27.3531	53.3235	66.7513	85.1534	84.4209	124.643
81	0.1314	1.19952	2.23712	4.15972	3.9461	6.93682	11.2093	17.618	22.5313	50.4244	62.6619	89.3953	90.2193	122.629
81.5	0.31451	0.74176	2.78643	4.55645	4.9837	7.73028	11.1788	16.3057	23.2027	55.2462	50.6685	90.2803	95.804	123.392
82	-0.35688	0.83331	2.2066	5.44146	4.61749	7.54717	13.376	17.9842	25.4305	56.8636	54.3306	98.7642	95.4073	139.871
82.5	0.34503	0.6502	2.57281	5.1668	4.4649	7.63873	12.8267	18.3199	25.7051	55.0936	52.1639	94.3392	95.8956	145.029
83	0.22296	0.71124	1.96246	3.73248	5.34991	7.79132	13.2234	17.1602	26.5901	48.1661	54.2391	97.0552	108.743	133.615
83.5	-0.02118	1.07745	3.18316	3.64093	4.31231	7.51666	11.5145	18.6556	26.2239	51.7977	54.5442	93.7898	92.6912	120.767
84	0.61969	0.89434	3.54937	3.57989	5.28887	8.2796	13.5591	20.3646	23.7825	60.0374	56.9551	94.5223	99.7713	133.981
84.5	0.25347	0.80279	2.69488	5.13629	4.83111	7.39459	13.9253	20.9444	24.3013	57.3824	51.4925	95.865	95.7735	139.505
85	-0.20429	0.9859	2.60333	4.34283	5.41094	8.64581	13.5591	19.5406	27.0479	46.7623	47.6778	92.9659	93.271	133.249
85.5	-0.20429	1.56573	2.69488	4.92266	5.1668	8.00494	12.7657	17.7095	26.285	48.3797	46.8538	95.5599	88.8155	131.998
86	-1.15033	1.26055	2.81695	4.61749	5.47198	8.24908	14.6883	16.4583	25.6136	49.2342	58.4505	85.5501	89.0291	136.27
86.5	-0.60102	0.74176	2.75592	3.70196	5.38043	7.54717	12.7352	20.5477	29.0621	45.8467	66.3851	87.8084	103.403	140.054
87	-0.47895	1.04693	2.78643	3.54937	4.86163	8.55426	12.0638	20.1509	25.2474	44.8396	65.0118	84.3904	111.124	146.433
87.5	-0.5705	0.80279	2.75592	3.97662	5.74664	8.40167	12.0027	18.2894	22.9891	47.4337	61.5633	87.1065	116.678	147.409
88	-0.20429	1.59625	3.30523	3.91558	5.13629	8.61529	10.9651	19.2049	23.0196	52.3775	57.535	84.3904	110.575	121.439
88.5	0.25347	1.90142	3.39679	4.06817	4.52594	8.2796	11.7586	17.8621	27.8719	45.5721	66.2935	86.9234	114.389	114.786
89	0.34503	1.44366	3.09161	3.88507	5.34991	8.34063	10.721	22.5923	31.7476	51.3094	67.6058	83.9632	107.096	124.185
89.5	1.19952	2.11505	2.3897	4.03765	5.5025	8.40167	11.3008	22.806	26.1019	52.8658	73.6482	85.9468	115.457	124.124
90	0.61969	1.35211	2.2066	3.9461	5.59405	8.15753	10.66	20.5477	26.7122	58.7251	70.9017	86.1299	121.134	123.758
90.5	0.86383	1.13848	2.35919	4.64801	4.64801	8.12701	10.721	18.8692	30.5269	54.5137	62.1126	83.2308	116.464	130.258
91	0.22296	1.77935	2.93902	5.22784	5.47198	9.77496	12.1859	18.0452	31.595	44.565	64.4319	92.5691	119.058	118.814
91.5	0.6502	1.41314	2.29815	6.41803	5.07525	9.46978	10.6905	17.9537	31.3509	49.9056	60.9834	88.3272	111.246	128.671
92	1.26055	1.10797	2.42022	4.52594	5.13629	8.06597	10.4464	17.3128	25.2169	41.3912	65.9883	92.5997	106.821	130.655
92.5	-0.0517	0.71124	2.57281	5.01422	4.86163	8.18804	11.3619	21.097	24.7896	42.3067	61.7769	97.9097	100.626	133.035
93	-0.08222	0.34503	1.6878	3.91558	3.91558	7.63873	11.5145	20.212	26.9869	41.7574	56.4363	98.5201	103.189	119.425
93.5	0.28399	1.07745	1.93194	3.2442	3.9461	8.43219	10.1717	19.0828	24.9422	42.2762	66.3851	81.4302	108.438	124.216
94	0.25347	1.169	1.74884	3.73248	4.34283	7.54717	12.0333	19.0218	28.055	34.7689	62.9976	84.8482	113.535	123.331
94.5	-0.35688	1.23004	1.6878	3.54937	4.00714	7.36407	11.6976	17.1907	28.879	36.0201	69.4368	92.1724	109.262	131.845
95	-0.50946	0.49762	1.71832	2.78643	4.15972	8.85943	12.1859	15.6343	35.6539	36.2032	74.2891	96.5059	108.347	141.763
95.5	-0.84516	0.80279	2.7254	3.97662	3.85455	7.51666	11.8196	16.7635	35.4402	41.6963	78.5921	85.8553	104.318	138.071
96	-0.47895	0.37554	1.99298	3.18316	5.96026	6.35699	9.19512	17.4959	30.6185	47.4642	78.1954	92.1419	104.898	132.913
96.5	-0.60102	1.169	1.84039	3.33575	3.85455	6.57061	10.0801	20.2425	27.4446	44.8702	84.0853	91.5315	109.445	133.737
97	0.00933	0.95538	2.2066	3.2442	4.55645	7.48614	11.606	17.7095	26.346	44.504	86.4351	101.694	100.076	141.947
97.5	0.55865	0.89434	2.54229	3.67144	4.58697	8.92047	9.62237	20.0594	29.2146	43.8326	78.2259	97.8487	109.476	123.606
98	0.83331	0.95538	2.02349	4.00714	4.86163	7.91339	10.5684	18.5335	31.7781	41.1165	81.6438	92.9048	110.666	126.352
98.5	-0.11274	1.80987	2.29815	4.03765	4.31231	6.75372	11.1483	18.0452	32.1138	40.1399	89.8531	79.8738	100.29	132.669
99	-0.47895	0.58917	2.35919	3.48834	5.96026	6.60113	12.5521	19.6321	30.5269	48.8375	84.6956	82.0711	103.739	133.341
99.5	0.16192	1.10797	1.5047	3.97662	5.19732	6.44854	11.7586	19.7847	29.1231	47.8304	80.2706	80.24	96.8721	145.944
100	0.07037	0.40606	1.99298	2.93902	5.41094	6.41803	11.9417	20.273	30.1912	46.4571	77.1883	80.3926	100.229	132.028
100.5	-0.35688	0.49762	2.32867	4.31231	3.97662	7.18096	10.5379	17.6485	32.5106	47.6473	79.8738	73.7703	98.0013	124.063
101	0.25347	0.00933	1.93194	4.25128	4.86163	8.95098	10.0191	16.2142	30.7405	45.0228	75.2352	85.9163	104.746	142.984
101.5	-0.44843	0.61969	2.75592	4.40386	4.37335	8.52374	10.8736	19.9678	27.5667	37.6985	68.7959	89.0596	106.18	138.559
102	-0.53998	1.13848	1.90142	4.4649	4.77008	7.15045	11.0872	18.503	25.7967	40.4451	75.3877	93.3626	100.809	129.862
102.5	0.4671	1.13848	2.26763	4.89215	4.40386	7.48614	12.4605	17.3433	29.8555	34.9214	71.8172	91.8672	99.3746	134.653
103	0.1314	1.32159	2.69488	3.61041	4.67852	7.21148	11.0872	15.8785	30.4354	33.8838	74.6858	110.3	108.164	127.97
103.5	0.40606	0.89434	1.53521	3.67144	5.10577	8.58477	10.9651	14.3831	27.6583	39.0413	73.4651	90.0057	98.8863	134.683
104	0.22296	1.47418	2.93902	3.30523	5.04473	7.66925	10.5989	15.2376	27.292	37.8511	65.5001	87.1675	95.1631	146.524
104.5	0.55865	1.65728	3.36627	3.70196	4.52594	7.08941	11.2703	15.848	26.1019	37.4544	58.4505	84.4209	98.7337	134.104
105	0.37554	0.95538	3.33575	3.91558	4.70904	8.15753	12.7047	15.848	32.2664	31.9002	63.5774	87.5948	93.8814	136.27
105.5	0.77227	1.99298	4.00714	5.31939	6.17388	8.40167	10.8736	19.1439	33.3345	37.0577	75.0826	96.7806	92.3555	141.794
106	-0.14325	1.41314	3.79351	4.73956	5.96026	9.28668	11.0262	18.503	34.8299	40.2925	78.3174	102.793	100.626	130.411
106.5	0.89434	1.5047	3.57989	4.89215	5.34991	8.70684	13.2845	16.6109	35.4708	40.201	76.4864	94.5833	109.323	136.545
107	0.83331	1.84039	4.09869	4.77008	4.86163	8.15753	13.2234	16.8855	27.3836	39.1024	73.16	93.149	108.896	147.165
107.5	0.00933	1.01641	3.45782	4.15972	5.86871	8.09649	14.2916	15.5123	30.2828	37.6375	62.3567	83.6885	110.025	139.505
108	0.52813	0.61969	3.67144	3.91558	4.28179	7.66925	14.0474	16.6109	28.2381	34.0975	69.5589	84.9092	100.961	140.543
108.5	0.37554	1.29107	2.11505	4.49542	4.77008	8.09649	13.8338	15.8785	26.5291	31.3509	79.9349	101.511	100.778	135.263
109	0.28399	1.07745	1.10797	4.49542	4.4649	8.34063	13.4065	16.3667	21.7379	29.9776	87.137	88.2967	106.912	130.686
109.5	0.16192	1.32159	0.19244	4.34283	4.70904	7.54717	13.0098	20.9749	26.3765	35.837	84.1463	99.5272	102.701	137.125
110	-0.02118	0.83331	1.44366	4.19024	4.12921	7.63873	13.0403	24.5455	21.982	42.4593	82.1321	87.5032	104.99	136.575
110.5	0.92486	0.89434	0.52813	3.91558	4.00714	6.50958	12.4605	26.285	22.2261	39.1634	87.0149	78.1954	98.9473	135.019
111	0.19244	0.92486	0.03985	3.763	4.49542	7.36407	13.8033	22.3177	26.8648	37.4849	80.0569	87.8694	98.0623	110.3
111.5	-0.20429	0.71124	0.34503	3.54937	4.67852	7.18096	14.0474	20.9139	21.982	31.473	73.16	79.5381	103.8	118.143
112	0.07037	1.169	0.95538	4.28179	5.22784	7.39459	12.7962	18.8692	24.1487	35.1351	75.6624	74.8079	104.746	115.793
112.5	-0.47895	0.31451	0.31451	4.19024	4.80059	7.30303	14.8104	18.1978	29.764	37.2103	75.3267	65.2559	88.6324	111.002
113	0.19244	1.169	0.83331	4.19024	5.10577	7.05889	12.43	20.7003	27.1395	36.7525	77.3103	72.8548	87.6253	106.333
113.5	-0.53998	0.92486	2.42022	4.15972	4.49542	6.84527	12.0333	23.813	29.6419	33.2735	74.9605	85.0618	80.2706	99.4661
114	-0.47895	0.77227	0.9859	4.58697	6.41803	7.08941	12.4605	23.5079	26.9869	31.8087	78.6531	84.6346	90.0972	104.654
114.5	-0.02118	1.10797	0.00933	4.40386	6.08233	7.57769	12.43	22.9891	28.116	31.2899	87.4727	90.2498	92.4471	130.777
115	0.37554	1.71832	1.07745	4.31231	4.83111	7.15045	11.8501	22.0125	28.5128	37.4239	80.6368	101.633	95.6209	130.564
115.5	0.03985	1.13848	0.68072	5.28887	4.73956	7.69976	12.8878	21.982	23.1111	41.6963	83.2613	103.22	84.7261	133.188
116	-0.84516	0.74176	1.169	5.1668	4.58697	8.12701	12.5826	19.1133	22.928	39.1329	86.1604	92.264	90.3108	135.568
116.5	-1.02826	0.80279	0.80279	2.9085	5.38043	7.45562	11.545	17.9842	23.1722	35.4097	87.9	99.0694	90.2193	129.129
117	-0.87568	1.29107	1.84039	3.79351	6.23492	7.91339	11.7586	16.794	23.8436	38.5836	84.7261	102.609	90.1888	127.939
117.5	-0.0517	1.169	1.53521	4.15972	4.70904	7.82183	11.1788	16.855	26.6817	37.6375	80.9114	106.272	104.746	122.324
118	0.00933	1.5047	2.02349	3.97662	4.83111	8.58477	11.1483	20.5172	25.0948	37.668	77.9512	101.114	111.185	122.049
118.5	0.07037	0.74176	1.04693	3.73248	4.22076	9.16461	11.1177	18.2283	27.4141	33.2125	71.7562	88.2967	113.962	119.028
119	0.6502	1.35211	1.47418	4.49542	5.19732	10.1106	13.1014	18.1063	25.7662	32.48	72.275	91.4705	111.582	121.591
119.5	0.4671	1.99298	1.5047	4.06817	4.77008	11.1177	11.4534	19.9983	24.3929	32.9073	69.9861	85.4891	104.868	126.901
120	0.37554	1.96246	2.23712	3.9461	5.62457	8.9815	10.7515	22.0125	26.7122	34.6163	63.73	88.4798	96.9942	129.312
120.5	0.25347	1.32159	1.87091	4.15972	6.32647	10.2327	12.0027	22.1346	27.8108	39.7737	74.8995	76.3033	102.274	146.677
121	0.77227	2.3897	1.169	3.82403	6.7232	8.58477	10.66	19.5101	30.2217	35.9896	76.7	79.0193	86.9539	139.963
121.5	0.89434	1.35211	0.92486	4.52594	6.5401	8.37115	10.7515	16.0311	29.4893	38.2173	74.5332	85.4891	86.9539	146.86
122	0.52813	2.3897	2.45074	4.9837	5.38043	10.782	12.0333	16.8245	24.8506	36.5389	78.4395	86.4961	88.1746	140.36
122.5	1.04693	1.53521	3.15264	5.86871	5.96026	9.95806	13.9559	16.3362	22.9891	43.2833	66.0189	102.915	91.8672	154.947
123	1.13848	2.11505	1.90142	5.34991	5.07525	7.9439	11.4839	18.0757	28.9705	47.9219	68.3077	90.9517	99.3135	143.137
123.5	0.40606	2.2066	3.2442	4.92266	4.77008	10.5989	13.0098	20.2425	27.17	40.2315	61.2276	85.7637	102.06	139.2
124	0.31451	2.08453	2.9085	4.52594	5.1668	12.3079	12.9793	18.8997	29.5504	37.3018	63.3638	92.6912	100.809	129.434
124.5	0.34503	2.05401	2.42022	4.31231	4.80059	11.6365	12.1859	20.8223	31.6561	40.7503	61.3192	88.8155	105.234	137.369
125	0.31451	2.14556	1.62677	4.49542	4.58697	12.3689	11.3008	22.1041	33.6702	43.0696	61.1055	93.149	96.2618	129.984
125.5	0.43658	1.29107	1.5047	5.07525	4.34283	12.1553	10.4464	22.5923	35.5623	50.4854	58.6946	99.3135	85.6722	126.077
126	0.55865	1.71832	1.04693	4.58697	4.67852	8.9815	11.545	20.7613	27.7498	41.4827	58.0538	104.044	88.1746	119.547
126.5	0.00933	1.59625	1.80987	4.25128	3.64093	7.15045	10.4464	24.5149	26.9564	43.5884	67.6058	99.4661	87.6558	113.657
127	-0.84516	1.87091	1.65728	4.19024	4.49542	8.06597	11.2703	23.4468	29.3367	43.4358	74.5638	104.074	88.0831	112.314
127.5	-0.26532	1.13848	2.26763	4.12921	4.12921	7.51666	10.1106	22.9891	32.1138	43.4053	79.9043	98.9473	82.6509	126.627
128	-1.39447	0.80279	3.15264	3.27471	4.15972	8.00494	9.98858	26.6207	31.4424	39.4991	79.5992	89.4563	92.5386	125.406
128.5	-1.82172	1.80987	2.60333	4.12921	3.97662	10.0801	9.80548	23.3553	26.5901	38.7361	69.9556	82.4373	90.3108	141.336
129	-1.21137	1.74884	1.93194	2.81695	4.28179	10.1717	10.9346	25.0032	24.0877	44.0767	74.0144	89.1206	97.2994	145.09
129.5	-1.39447	1.41314	2.26763	2.87799	4.06817	9.25616	10.2632	23.6299	27.231	48.4102	69.0401	83.1087	93.3626	148.081
130	-1.42499	1.90142	3.15264	3.15264	4.4649	8.9815	11.3619	24.5149	27.6277	40.3231	73.16	81.2166	91.3179	148.325
130.5	-0.29584	1.84039	2.93902	4.89215	4.09869	7.33355	9.80548	22.806	26.8343	39.7432	80.5452	83.4444	87.4422	134.958
131	-1.82172	1.99298	2.63385	5.31939	3.82403	7.48614	10.9346	24.3624	27.0784	40.7198	77.3409	83.597	90.7686	132.181
131.5	-0.69257	1.59625	2.81695	3.33575	3.61041	7.88287	11.0567	22.928	28.2686	38.8582	74.1976	84.1768	103.22	132.73
132	-1.57758	1.5047	2.7254	3.39679	3.27471	7.45562	12.8878	24.9422	27.7803	33.2735	71.2679	85.0618	111.582	129.404
132.5	0.1314	2.08453	2.48126	3.97662	4.03765	7.7608	10.2938	21.921	27.4751	31.9917	76.1812	86.0689	104.532	125.101
133	-1.02826	1.71832	3.06109	3.54937	3.36627	6.99786	11.606	23.7215	26.6207	36.1116	71.9393	100.138	100.687	125.681
133.5	-0.20429	1.38262	2.87799	4.67852	4.61749	7.7608	10.2022	27.1395	27.2005	39.5296	75.1436	89.7615	91.8672	116.22
134	-1.42499	2.02349	2.51178	4.77008	4.77008	7.18096	10.7515	23.8436	28.055	40.9639	78.3174	94.2476	94.858	122.324
134.5	0.03985	1.93194	2.78643	3.88507	4.70904	7.30303	11.1177	21.7073	29.764	47.6473	75.5098	80.6368	90.8907	120.798
135	-0.35688	1.5047	2.63385	3.67144	4.19024	7.02838	10.9346	23.9656	27.7193	38.6141	67.5447	81.6133	94.1255	123.178
135.5	0.6502	1.93194	2.69488	4.22076	4.12921	8.40167	10.1717	24.0267	26.4681	37.1797	72.0613	79.1109	99.4661	127.603
136	0.1314	2.14556	3.21368	4.19024	5.13629	7.39459	9.40875	24.637	25.7967	33.365	69.1927	87.2286	102.213	116.495
136.5	0.92486	1.44366	2.29815	3.57989	5.59405	7.91339	9.62237	28.5128	26.8038	35.4708	73.282	89.2427	104.532	131.693
137	0.25347	2.05401	2.42022	3.82403	4.89215	8.70684	10.4769	23.691	25.2169	41.2996	74.6858	98.0318	110.361	139.963
137.5	-0.08222	1.56573	2.7254	3.70196	4.19024	9.74444	9.98858	24.3929	27.5667	39.7737	71.7562	98.8252	104.196	123.422
138	0.10089	0.83331	2.84747	3.91558	4.61749	9.04254	9.65289	24.698	25.7051	43.3443	79.4466	105.692	104.41	131.265
138.5	0.03985	2.17608	2.93902	3.48834	4.86163	8.70684	10.5989	18.9302	25.1558	42.9171	81.3692	96.628	104.624	135.263
139	0.86383	2.23712	3.64093	5.07525	5.74664	9.28668	10.8126	21.0665	30.0081	43.9241	82.3152	88.5408	103.037	133.005
139.5	0.80279	2.42022	3.4273	4.61749	5.59405	8.58477	10.9957	18.6556	25.6441	44.6871	75.9371	84.8787	107.309	134.226
140	-0.32636	2.23712	2.93902	4.15972	5.28887	10.2327	12.0638	19.3575	23.5994	41.4522	67.7889	103.22	103.494	134.622
140.5	-0.47895	2.14556	2.96954	4.49542	4.80059	10.3853	12.491	21.9515	26.346	41.7574	70.6575	98.3064	108.072	136.209
141	-0.23481	2.35919	2.78643	4.22076	6.60113	10.0191	11.7281	19.4795	31.2899	39.3465	69.9556	90.8296	114.694	137.094
141.5	0.74176	2.08453	3.27471	4.19024	6.87579	11.0262	11.2398	17.2213	35.837	36.5694	66.1714	89.1206	113.413	137.277
142	0.25347	1.26055	3.2442	4.31231	4.89215	9.77496	14.8409	17.4654	34.3416	41.5132	65.6221	90.7991	104.166	131.51
142.5	0.16192	1.56573	3.18316	4.22076	4.06817	8.34063	16.1531	16.6719	31.2593	38.1868	61.899	92.1724	107.889	130.655
143	-0.08222	1.53521	3.15264	4.22076	4.86163	9.56134	13.0403	18.503	29.3062	38.3394	59.0914	90.6465	110.636	119.333
143.5	0.16192	1.80987	3.79351	4.25128	4.55645	7.82183	11.2703	20.5782	23.813	42.0626	58.1453	84.2378	108.743	125.894
144	0.1314	1.26055	3.45782	4.64801	3.88507	8.06597	10.9957	16.6414	24.2098	37.8206	52.1639	89.4258	103.739	146.738
144.5	-0.38739	1.96246	3.33575	4.52594	4.52594	8.64581	10.0801	15.6648	23.9656	35.837	59.9153	96.9637	95.8956	143.839
145	-0.5705	1.13848	3.15264	3.09161	4.00714	8.70684	11.9417	16.6719	23.752	35.3487	63.0892	88.5713	99.8628	140.512
145.5	-0.78412	0.9859	3.54937	3.9461	4.55645	8.67633	11.9112	13.7117	22.2872	35.4402	60.251	85.0618	101.999	137.186
146	-1.48603	1.19952	3.00006	3.57989	4.12921	8.40167	11.2093	15.3292	26.0713	33.365	60.251	96.689	112.345	133.798
146.5	-1.0893	1.53521	3.27471	4.31231	3.67144	7.97442	11.3314	13.6202	26.6512	39.8653	61.014	101.541	95.2547	140.177
147	-0.47895	1.74884	2.87799	3.12213	4.70904	7.60821	11.9112	15.4817	23.752	39.8958	61.96	90.2193	94.7054	141.123
147.5	-0.02118	2.23712	3.2442	3.79351	5.22784	8.76788	12.2469	16.4583	28.9095	43.1917	61.4107	89.3953	90.4329	155.222
148	0.4671	1.59625	3.39679	4.00714	3.61041	11.5145	12.7047	17.1297	32.9683	41.086	55.3377	93.5762	95.2852	152.811
148.5	-0.29584	1.53521	3.79351	3.39679	4.43438	10.5684	13.0709	16.4888	29.5809	44.5345	66.9344	100.931	87.961	141.306
149	-0.60102	1.41314	3.2442	3.54937	4.67852	9.86651	12.6131	17.7401	32.419	44.9007	62.8145	98.459	85.6722	152.597
149.5	-1.76069	1.74884	2.78643	3.48834	5.44146	7.82183	12.2774	16.5804	32.2969	46.5791	56.9246	90.7686	85.9773	139.2
150	-0.87568	1.71832	3.03057	4.4649	4.95318	8.43219	12.9183	17.7706	30.6795	46.4571	65.4695	94.0645	79.0804	130.899
150.5	-0.11274	1.77935	3.45782	4.58697	4.34283	9.89703	12.0333	17.8621	30.4354	42.4288	67.0259	95.9566	88.846	124.918
151	0.74176	1.93194	2.81695	4.25128	5.62457	10.2938	13.8948	18.7776	30.8016	37.6985	61.96	91.5315	95.8345	124.643
151.5	0.00933	1.71832	3.09161	3.763	4.61749	9.07305	12.0638	22.2261	35.2266	37.5154	64.0047	88.4188	92.5691	139.658
152	-0.35688	1.77935	3.18316	3.91558	5.5025	8.55426	12.8572	20.7003	27.4751	40.3841	66.5682	78.5005	102.06	132.303
152.5	0.22296	1.38262	3.21368	4.19024	4.49542	9.13409	14.0474	18.2894	26.2239	34.952	81.7354	73.16	101.419	126.962
153	0.40606	2.60333	3.06109	3.82403	5.1668	9.89703	12.491	15.8785	21.4327	39.1024	84.8482	77.8597	102.243	119.669
153.5	-0.29584	1.56573	3.30523	3.33575	4.55645	7.79132	12.7657	17.2518	24.5149	40.7503	92.5081	84.9092	101.145	114.45
154	0.03985	2.3897	2.66436	3.30523	4.89215	7.21148	13.1319	17.3738	28.3602	43.8936	86.0689	97.3604	106.424	121.134
154.5	0.28399	1.77935	2.96954	3.61041	3.97662	7.36407	12.43	18.3504	31.3204	53.0184	77.7986	89.0596	116.709	122.659
155	-0.0517	2.2066	3.48834	3.91558	5.71612	6.75372	10.4158	19.388	31.2288	50.3023	64.5845	84.9703	115.091	118.692
155.5	-0.38739	1.169	3.2442	3.82403	5.44146	8.7984	10.8736	19.9678	33.2125	49.753	68.7349	82.6509	122.415	123.148
156	0.10089	1.93194	3.18316	4.31231	5.25836	9.16461	10.9651	17.8011	33.4566	47.4337	69.1316	85.9773	106.302	124.613
156.5	0.6502	0.40606	2.96954	3.82403	5.19732	10.2022	12.7657	16.7635	28.6043	44.2903	70.4744	93.3321	103.037	126.047
157	1.19952	1.84039	4.4649	3.4273	5.65509	8.40167	12.2469	14.1084	22.6229	43.7105	69.9556	96.628	103.159	135.355
157.5	0.61969	1.62677	2.87799	4.4649	5.01422	8.55426	11.545	15.2681	28.055	45.1754	71.1763	101.206	105.661	129.953
158	0.31451	1.41314	4.00714	3.54937	4.73956	8.43219	9.59185	14.4136	27.6583	40.0179	72.5496	91.44	103.8	132.028
158.5	0.4671	1.04693	3.09161	3.12213	5.04473	9.19512	9.83599	16.4888	26.5596	36.5389	72.6717	87.5643	108.194	152.902
159	-0.17377	2.11505	3.45782	3.73248	4.95318	10.9957	10.4158	16.7635	34.189	35.837	67.8499	94.0645	96.689	129.068
159.5	0.10089	2.26763	3.39679	2.96954	5.19732	9.59185	10.9041	17.8011	34.7078	31.0457	61.6243	78.8973	99.0083	131.418
160	-0.0517	1.07745	3.21368	3.48834	5.65509	8.67633	11.9112	16.9161	31.8697	37.0271	60.3731	79.9654	105.997	135.69
160.5	0.6502	0.92486	3.21368	3.82403	4.34283	8.52374	13.6507	16.3057	32.419	37.5154	52.8658	82.3152	98.7032	141.184
161	0.40606	1.01641	2.60333	4.06817	3.85455	10.8736	13.1929	17.4959	30.4354	38.553	52.8658	79.6907	101.236	136.759
161.5	0.00933	1.35211	3.36627	3.2442	3.97662	9.95806	11.8196	15.0545	26.8648	36.9356	71.1763	76.639	104.99	132.547
162	-0.0517	0.83331	3.03057	3.18316	4.37335	10.2938	10.3243	17.2213	27.3226	31.7171	75.1741	91.8062	105.753	129.221
162.5	-0.17377	0.83331	2.3897	2.66436	4.34283	9.31719	11.4229	17.618	26.4681	42.032	68.857	86.6182	114.816	136.301
163	-0.11274	1.35211	2.87799	2.96954	3.9461	9.62237	11.7891	19.7847	27.5972	37.9732	64.2793	80.2706	118.204	131.998
163.5	-0.02118	1.26055	2.54229	2.63385	4.31231	11.2093	10.9041	18.2894	29.2452	39.5296	77.7071	78.9583	108.988	129.312
164	-0.41791	1.90142	3.51886	3.48834	4.83111	7.79132	9.22564	16.4583	28.8179	36.1116	66.0799	84.0853	93.9119	141.825
164.5	-0.5705	2.51178	4.00714	3.57989	4.61749	7.73028	9.92755	16.9466	29.3978	34.9825	59.0303	72.0003	97.3604	153.36
165	0.28399	1.77935	3.82403	4.03765	3.61041	8.67633	9.77496	19.6321	24.2098	37.2713	49.2952	73.8619	103.922	149.393
165.5	-0.26532	1.80987	2.93902	3.39679	4.73956	6.84527	9.37823	18.9302	25.4	35.5623	50.638	76.639	105.203	151.499
166	-0.44843	1.5047	3.15264	4.03765	4.52594	7.02838	9.80548	19.327	26.8648	33.6092	53.9644	90.555	99.4051	141.001
166.5	0.37554	1.41314	3.12213	3.4273	3.9461	7.15045	9.13409	16.9161	23.9656	40.1094	58.6946	94.156	110.056	148.111
167	0.07037	1.84039	3.00006	3.4273	4.43438	7.54717	9.74444	16.3057	25.0643	54.6358	59.9153	88.5408	117.014	141.519
167.5	0.03985	1.74884	3.09161	2.96954	4.73956	7.18096	9.71392	15.7869	25.6136	56.6805	60.129	89.0596	98.0318	143.32
168	-0.38739	2.11505	3.9461	3.18316	5.71612	8.06597	9.53082	16.2447	25.8882	48.8375	64.2793	92.1724	107.401	137.186
168.5	-0.0517	0.77227	3.2442	4.28179	5.22784	7.69976	11.4229	19.8152	24.0877	41.3606	61.7464	89.7005	105.112	122.08
169	-0.41791	1.26055	3.15264	3.763	4.61749	6.75372	11.3619	17.6485	21.5547	41.1775	60.5867	83.3223	111.215	131.143
169.5	-0.35688	1.5047	3.51886	3.64093	4.37335	7.85235	14.7493	19.0828	28.8484	45.0228	65.3475	76.5474	119.943	128.244
170	-0.29584	-0.26532	3.36627	3.61041	4.40386	7.7608	13.0709	17.4959	29.0621	43.4358	58.6641	78.8973	107.95	126.108
170.5	-0.0517	0.9859	3.70196	3.70196	5.31939	6.96734	12.2164	20.1815	26.0408	45.2669	56.4669	71.0848	117.105	136.118
171	-1.11982	1.23004	4.00714	3.48834	5.41094	7.88287	12.43	17.4654	24.637	41.4217	61.136	69.2537	108.103	140.268
171.5	0.28399	0.4671	4.03765	5.65509	4.77008	7.82183	13.1014	19.7237	26.0713	47.4947	60.6478	71.0237	93.7898	148.111
172	0.28399	-0.17377	4.31231	5.1668	4.92266	7.33355	12.0638	18.6556	22.4092	55.8565	66.1714	77.7681	95.1937	144.846
172.5	0.58917	0.52813	4.70904	4.03765	5.6856	6.93682	10.9041	21.5547	25.2169	53.6592	68.5823	86.6792	105.356	158.579
173	0.68072	-0.84516	4.49542	4.67852	5.04473	7.57769	11.1177	19.6626	24.5455	50.7296	57.5655	84.1158	102.976	141.153
173.5	0.4671	-0.66205	3.97662	4.43438	5.07525	7.91339	12.7962	19.1133	20.5782	55.5818	62.8755	84.9397	105.539	127.512
174	0.77227	-0.60102	4.61749	4.49542	4.86163	7.91339	12.8878	21.3411	22.4703	55.826	61.3192	78.0733	100.87	130.96
174.5	0.95538	-0.02118	3.9461	4.43438	5.65509	7.242	10.1106	18.8387	25.1253	54.8189	53.4456	86.9234	100.87	129.526
175	0.34503	0.10089	4.52594	3.4273	6.14337	6.50958	9.86651	19.9068	21.921	56.6194	54.6663	82.4373	101.572	133.127
175.5	0.71124	-1.39447	3.9461	3.9461	5.71612	7.18096	10.3853	20.3646	25.461	53.3846	65.9883	81.3997	96.3228	137.888
176	-0.02118	-0.72309	3.88507	4.19024	4.4649	7.48614	10.3853	18.8082	20.7918	58.2369	57.8096	90.4024	91.3484	131.662
176.5	-0.17377	0.07037	3.64093	3.85455	4.49542	7.05889	10.66	17.4959	21.2496	62.3567	53.5372	111.368	96.4449	122.995
177	0.28399	0.61969	4.00714	3.67144	4.92266	7.60821	11.0872	17.3433	24.576	55.002	56.5889	89.9751	95.8345	130.472
177.5	0.58917	0.40606	3.79351	3.97662	4.80059	7.33355	11.2703	22.2872	24.2708	51.7061	56.4974	84.1768	94.6443	130.472
178	-0.63154	1.19952	3.97662	4.15972	4.64801	7.36407	11.6976	17.2823	26.8343	52.6827	64.0962	69.2232	81.1556	114.42
178.5	-0.35688	0.6502	4.12921	3.12213	4.49542	7.27252	11.0567	19.0523	24.3013	57.3824	59.7017	73.8924	87.137	121.652
179	0.10089	0.03985	3.61041	3.70196	5.56353	6.99786	11.1788	18.9302	22.6839	52.5301	54.4222	68.033	95.7735	127.42
179.5	-0.23481	-0.17377	3.67144	3.27471	5.38043	8.09649	10.4464	18.0452	24.1182	49.9056	66.0189	69.3453	93.6067	138.223
180	-0.35688	0.37554	4.67852	4.4649	5.74664	7.15045	11.1177	15.7869	22.5008	49.1121	65.439	72.1529	99.1609	131.449
180.5	-0.53998	0.71124	4.58697	3.30523	4.49542	6.81475	10.8126	15.1155	24.3624	51.7671	68.5213	77.3103	96.3533	131.326
181	-0.29584	0.80279	4.83111	4.12921	4.73956	6.32647	10.0801	18.9608	22.043	50.7906	64.615	77.4934	92.5691	133.28
181.5	0.92486	0.71124	4.40386	3.61041	3.97662	6.66217	9.65289	18.1063	22.1346	45.8162	66.4766	77.4934	95.2547	123.667
182	-0.44843	0.71124	3.85455	4.34283	4.70904	6.90631	10.7515	14.5052	21.7073	48.4102	68.3687	78.5005	85.7942	128.458
182.5	0.00933	0.80279	3.73248	3.21368	4.37335	7.21148	10.5684	15.5123	22.3482	40.8113	71.8477	80.5452	89.7005	116.983
183	0.95538	0.77227	3.54937	4.86163	4.43438	6.75372	10.5074	14.2	23.6605	48.0135	69.7725	77.5545	91.9893	115.854
183.5	0.07037	0.25347	3.4273	4.15972	5.92974	7.63873	11.5755	14.4747	23.5384	47.6473	71.0542	66.5987	101.358	133.524
184	0.80279	1.07745	3.15264	5.1668	5.96026	6.93682	10.5684	16.2752	24.3318	53.232	70.566	60.4341	100.992	124.491
184.5	0.31451	0.86383	3.67144	5.13629	4.80059	6.7232	10.5684	16.3057	27.4446	49.0511	68.0635	70.688	111.093	114.054
185	0.89434	0.4671	4.00714	4.28179	4.77008	6.50958	11.4229	15.2071	28.7569	40.6282	63.1502	74.1976	110.361	111.49
185.5	-0.32636	-0.41791	4.12921	3.57989	5.38043	8.03546	11.8501	16.4278	26.1019	39.6517	60.8309	77.646	110.849	119.852
186	0.6502	0.03985	3.9461	3.73248	6.87579	7.73028	10.3243	16.3362	25.2779	42.3067	57.4129	86.0079	105.966	123.209
186.5	0.68072	1.35211	4.64801	5.41094	6.63165	9.5003	10.1106	16.4278	26.285	40.6587	48.2576	91.3484	108.682	142.496
187	-0.11274	1.07745	3.21368	4.00714	7.05889	8.82891	10.5989	14.3221	31.595	47.983	53.293	88.7544	99.7713	136.423
187.5	0.34503	1.29107	4.49542	4.77008	5.83819	6.93682	10.5074	17.8621	28.3907	45.9688	63.1807	78.409	104.776	137.705
188	-0.11274	1.96246	4.06817	5.34991	4.70904	7.02838	11.1483	16.4278	27.5972	42.7034	56.2227	91.7147	100.229	144.266
188.5	0.10089	2.02349	3.9461	4.73956	4.89215	9.37823	12.0333	16.9161	26.9869	51.4314	52.0723	89.9141	90.1277	147.806
189	1.13848	1.41314	3.45782	5.31939	4.83111	10.0191	12.2164	17.3738	22.9891	42.8865	54.9715	81.8269	94.6138	141.367
189.5	0.16192	2.2066	4.19024	5.10577	5.89923	8.4627	11.545	16.7635	24.7286	44.5955	65.3475	82.4678	95.3462	127.451
190	0.43658	1.96246	4.15972	5.04473	5.28887	7.4251	10.2938	17.2823	24.9727	55.4598	55.7039	85.5806	96.3838	118.997
190.5	-0.02118	2.42022	4.28179	5.5025	4.9837	7.33355	9.98858	15.5123	27.4751	60.7698	49.1121	92.264	103.281	134.165
191	0.71124	2.17608	3.45782	4.67852	4.80059	7.27252	11.3924	17.4349	29.825	56.0396	49.5394	98.2454	92.8438	129.373
191.5	1.23004	1.74884	3.39679	4.80059	5.04473	8.70684	11.4839	19.449	24.1487	52.8047	49.6919	106.119	90.3414	128.366
192	0.68072	2.3897	3.73248	3.82403	5.62457	7.48614	11.8196	17.4654	22.6534	49.7835	50.4854	97.9097	96.5669	132.517
192.5	0.03985	2.29815	3.61041	4.09869	5.13629	7.15045	12.2164	20.6697	28.0245	41.8184	48.0135	94.095	104.837	124.857
193	0.37554	1.53521	3.21368	3.4273	4.83111	8.9815	10.2327	19.449	26.9564	45.1754	49.2342	83.8106	105.417	121.469
193.5	0.34503	1.80987	2.69488	3.763	5.44146	7.54717	9.92755	18.7776	25.0032	48.1661	60.19	88.2051	106.76	130.96
194	-0.20429	1.04693	4.03765	3.57989	4.28179	6.5401	11.3924	20.9444	21.0359	44.4124	56.6805	80.3926	104.563	123.789
194.5	-0.63154	1.29107	3.763	4.40386	4.19024	6.60113	10.3548	23.8436	22.1041	52.408	56.711	83.7496	104.288	150.461
195	0.07037	1.93194	3.12213	4.49542	3.763	6.05181	10.2938	25.4305	22.7144	50.2413	50.8821	86.6487	108.255	141.855
195.5	-0.38739	2.17608	3.763	3.45782	4.15972	6.0213	9.56134	17.6485	24.7286	50.8516	49.6309	86.5877	100.26	150.583
196	-0.44843	0.92486	3.18316	3.91558	3.70196	6.57061	10.4464	19.6626	24.0267	54.7579	51.3399	90.5855	105.661	149.851
196.5	0.40606	1.169	3.36627	4.25128	4.31231	5.34991	10.3853	19.2049	29.1841	56.0701	49.5699	79.7212	104.929	135.752
197	-0.63154	1.10797	3.57989	2.87799	4.15972	6.23492	10.9346	22.6534	27.7803	47.6473	51.7977	77.8597	107.034	125.864
197.5	-0.08222	1.5047	4.40386	3.88507	4.28179	6.78424	10.721	22.5618	29.0926	49.1121	58.481	67.1175	111.429	132.15
198	-0.87568	1.01641	3.2442	4.00714	4.61749	6.57061	10.4769	18.0147	27.7498	48.0745	57.1993	68.1551	113.321	126.657
198.5	-0.78412	1.56573	2.93902	3.88507	4.12921	6.23492	9.95806	21.219	22.5313	52.8658	52.6216	69.0401	99.5882	133.798
199	-0.41791	0.55865	3.2442	3.54937	3.97662	6.26544	10.5989	19.6932	21.982	53.4456	51.584	71.6951	117.807	138.59
199.5	0.00933	0.89434	2.78643	4.61749	5.01422	6.75372	10.3853	21.3411	20.9749	56.8941	64.6761	75.3267	118.845	140.299
200	0.07037	1.38262	3.73248	4.61749	4.86163	5.62457	9.86651	18.7166	24.6675	52.4996	70.7185	90.677	104.624	129.068
200.5	0.58917	0.61969	3.67144	3.30523	4.34283	6.11285	9.74444	17.4959	28.2076	53.3235	72.0308	96.9026	97.7266	116.434
201	-0.26532	0.92486	3.36627	3.91558	4.64801	6.0213	11.4534	19.5711	29.6724	46.9759	68.4603	92.6912	99.344	112.619
201.5	-0.53998	0.89434	3.57989	3.12213	3.85455	7.39459	12.5215	20.7918	32.4495	42.5203	64.4014	90.9517	104.776	114.633
202	-0.78412	1.35211	3.57989	3.64093	5.65509	7.54717	12.0027	19.6932	30.7405	46.7317	60.5562	94.7359	106.668	119.699
202.5	0.00933	1.5047	4.61749	4.28179	4.58697	7.18096	12.2469	20.3646	29.7335	47.159	59.8848	90.9517	109.781	143.533
203	0.34503	1.23004	3.45782	4.03765	4.09869	8.76788	10.5684	23.6605	30.6795	45.2669	63.4249	100.473	112.406	124.979
203.5	-0.99775	1.29107	3.73248	3.57989	3.91558	9.43927	11.5145	23.5689	29.5504	48.2271	57.5044	95.2547	115.64	114.115
204	0.37554	1.23004	4.19024	4.09869	3.54937	9.34771	13.315	22.5923	30.2523	50.2107	61.136	97.1773	114.542	112.283
204.5	-0.08222	1.87091	4.61749	4.28179	4.03765	8.7984	12.6436	24.4844	30.1607	48.99	60.7393	83.8106	128.214	114.939
205	0.4671	1.93194	3.91558	3.82403	4.73956	8.82891	12.7047	22.6229	30.6795	56.4058	56.9551	81.949	104.654	131.723
205.5	-0.32636	2.05401	3.82403	4.19024	5.07525	9.43927	12.6741	22.1041	27.6277	52.3165	53.7813	84.6346	103.525	129.617
206	0.10089	1.6878	3.70196	4.64801	5.80767	10.5684	14.0169	23.3248	26.9258	55.5818	59.2439	84.543	100.321	141.641
206.5	-0.53998	1.41314	4.15972	4.61749	4.31231	7.82183	13.1929	23.4774	26.8953	50.699	72.6717	85.0923	116.678	133.096
207	-0.93671	1.35211	3.51886	4.55645	5.99078	8.34063	11.5145	20.1509	26.0408	46.4571	75.1131	84.4515	112.192	133.493
207.5	-0.17377	1.6878	3.2442	4.31231	5.34991	7.88287	12.8572	21.0665	23.9351	39.8043	71.7256	96.1092	114.633	122.049
208	-0.47895	1.04693	3.9461	3.57989	5.1668	7.18096	13.254	19.6016	23.1111	40.9639	67.7889	86.4046	99.8628	132.486
208.5	-0.50946	1.90142	3.91558	3.97662	4.95318	7.4251	12.4605	20.273	23.2027	43.0086	65.8052	92.7522	95.8956	127.146
209	0.16192	1.47418	3.48834	3.79351	5.22784	8.03546	10.5989	21.9515	22.1651	47.4947	66.0189	96.2313	107.096	141.886
209.5	-1.21137	1.6878	3.27471	3.88507	4.52594	6.93682	10.3548	21.4937	25.7356	50.0276	57.7791	83.9022	98.8252	134.989
210	-0.93671	1.38262	3.21368	3.00006	4.89215	7.05889	10.1106	18.8387	24.2708	54.056	54.7579	78.1648	107.187	123.972
210.5	0.25347	1.59625	2.69488	3.91558	4.58697	6.99786	9.77496	16.9161	30.6185	50.638	64.1878	75.6014	107.096	128.916
211	-1.24189	1.77935	2.87799	3.30523	4.12921	6.81475	12.8267	20.5782	30.2828	52.8658	66.1714	85.0313	106.76	129.923
211.5	-0.08222	1.53521	3.03057	2.60333	4.9837	5.80767	12.3079	19.6932	31.1678	53.5677	67.7278	82.6814	104.624	129.373
212	-1.0893	0.80279	2.84747	2.96954	4.37335	7.02838	13.3455	23.3858	27.0479	48.1356	71.8172	88.5713	99.6492	134.592
212.5	-0.96723	0.55865	2.87799	2.75592	3.97662	6.78424	13.254	22.8975	30.1912	44.5955	74.1976	86.4351	90.0667	132.822
213	-0.99775	0.52813	3.2442	3.70196	3.91558	6.90631	12.7352	23.3248	28.6043	45.6331	62.1431	97.7266	98.8863	139.475
213.5	-0.90619	1.47418	3.30523	3.4273	3.70196	6.29595	13.4065	24.1182	29.1536	48.929	60.5562	92.1419	102.976	144.846
214	-0.44843	1.56573	2.32867	2.42022	4.80059	6.87579	11.6365	24.8201	25.7356	44.8396	52.2859	88.3577	102.091	139.749
214.5	-0.93671	1.19952	3.39679	3.03057	4.12921	7.51666	12.0943	19.8152	21.8294	51.1873	58.8167	90.4024	109.171	138.284
215	-0.78412	0.77227	2.7254	4.55645	4.28179	6.81475	10.9041	18.6251	19.5101	52.6521	73.221	82.2237	98.7947	149.027
215.5	0.10089	2.17608	4.19024	3.61041	5.13629	6.50958	11.4229	17.4959	22.5618	47.4337	66.2935	88.6018	96.2923	148.538
216	0.00933	1.59625	3.15264	4.40386	5.6856	5.96026	12.491	17.8011	24.7896	42.8255	72.9158	91.0433	105.509	138.986
216.5	-0.72309	1.44366	3.30523	3.91558	5.04473	6.35699	10.2938	19.7542	26.1019	44.626	70.9932	90.6465	97.8182	131.967
217	0.1314	1.84039	4.12921	3.33575	3.79351	7.57769	9.95806	22.5618	22.6229	46.9149	73.0684	97.6961	106.821	129.801
217.5	-0.08222	1.169	4.4649	3.763	3.88507	8.15753	11.5145	17.1907	22.6839	42.2457	71.5425	95.6209	97.5435	125.345
218	-0.0517	1.38262	3.57989	3.64093	5.65509	9.71392	9.37823	17.3128	20.5172	43.68	71.3899	79.294	102.426	121.897
218.5	0.03985	1.90142	4.03765	3.12213	5.47198	7.69976	12.7962	19.6932	24.2098	50.6685	69.803	85.7027	113.565	121.042
219	0.10089	2.54229	3.30523	3.763	5.86871	7.66925	11.3924	20.8834	23.7215	43.3443	65.9883	90.5855	122.232	132.028
219.5	0.61969	1.65728	3.73248	3.64093	5.83819	7.36407	15.2376	24.4234	25.4915	40.7808	69.6199	84.6041	118.234	132.547
220	0.40606	1.32159	3.03057	3.763	6.11285	7.33355	12.3384	20.5782	25.2474	45.45	76.6695	82.9256	109.232	136.148
220.5	0.07037	1.32159	3.30523	3.27471	3.91558	6.60113	11.4229	23.4774	25.6441	46.5486	78.9583	82.6509	110.147	143.533
221	0.07037	1.62677	3.70196	3.67144	4.31231	7.48614	11.0262	19.2049	25.8272	48.2576	71.4205	81.4302	115.305	142.984
221.5	0.43658	1.35211	3.57989	4.95318	5.31939	7.45562	9.92755	20.3646	24.4539	51.584	77.3103	76.0286	109.018	137.857
222	0.28399	1.99298	4.43438	5.19732	6.26544	8.06597	11.6976	19.1744	24.4844	57.8707	68.8265	81.6133	108.286	134.683
222.5	-0.44843	1.47418	4.49542	5.65509	6.05181	8.82891	13.5897	19.6321	23.4468	51.2178	69.3453	94.0645	108.499	133.829
223	0.55865	1.26055	3.57989	4.67852	6.0213	10.3853	11.7891	20.7003	25.2169	52.7742	65.5611	94.8885	102.243	129.251
223.5	0.52813	1.65728	4.58697	3.61041	5.31939	7.97442	10.9041	20.5782	24.2098	61.014	69.6504	86.9234	97.2078	130.655
224	0.1314	1.99298	4.89215	3.97662	4.49542	8.00494	10.9346	19.0523	25.9188	58.42	78.0733	91.5315	98.9778	144.785
224.5	0.43658	2.05401	3.85455	3.73248	5.53302	7.39459	10.0191	19.5101	23.6299	56.5889	67.6058	94.5833	103.769	134.073
225	0.16192	2.02349	3.70196	4.22076	4.28179	7.4251	10.5989	16.9466	26.8038	45.9078	61.1666	95.2242	113.992	144.296
225.5	-0.23481	2.11505	3.70196	4.06817	4.37335	7.30303	11.1177	19.9373	30.1302	54.4527	69.0706	101.023	105.051	124.307
226	0.1314	2.45074	3.88507	3.51886	4.03765	7.51666	9.95806	19.7847	33.7618	56.4669	71.8477	100.382	108.255	129.251
226.5	-0.20429	1.26055	3.54937	3.85455	4.37335	7.18096	10.3548	19.4185	28.8484	56.7415	64.9202	109.72	105.844	134.958
227	-0.14325	1.96246	3.4273	3.45782	4.40386	7.02838	9.77496	19.6626	28.4212	47.7693	73.6482	101.846	111.826	131.601
227.5	-0.0517	1.77935	3.45782	2.87799	3.15264	7.33355	9.74444	17.7095	31.7781	47.7388	72.4275	100.9	102.976	130.258
228	1.07745	1.19952	3.12213	3.21368	4.22076	7.66925	10.2022	19.4795	35.0435	56.4974	69.1316	100.992	93.5762	121.713
228.5	0.16192	1.41314	3.39679	3.54937	3.70196	6.66217	9.65289	18.7166	33.4871	51.5535	67.4227	100.9	92.5386	124.979
232	0.40606	0.71124	2.7254	3.54937	4.31231	7.242	9.83599	18.8692	33.4566	50.4244	69.3147	97.9097	88.5713	118.173
232.5	0.19244	1.26055	2.48126	4.00714	3.64093	6.93682	9.28668	15.7259	33.3956	47.7693	62.4788	99.7713	106.485	113.718
233	-0.72309	1.35211	3.09161	4.52594	4.31231	8.31011	9.40875	14.7493	33.2125	52.9879	60.8004	95.5293	108.743	108.988
233.5	-0.11274	1.71832	3.54937	2.93902	4.43438	8.43219	9.62237	15.909	34.4637	52.6827	69.4368	96.1092	113.077	112.802
234	0.4671	1.35211	3.73248	2.9085	4.70904	8.4627	11.4229	15.085	39.4991	53.0794	77.585	88.6629	100.656	120.462
234.5	0.25347	1.38262	3.21368	3.4273	4.37335	7.4251	11.2093	14.5052	40.4756	48.0745	68.033	98.6727	103.311	121.225
235	-0.23481	1.77935	3.57989	3.2442	5.34991	7.7608	10.2938	15.8174	38.2173	53.5067	75.6319	93.0879	111.337	105.966
235.5	0.80279	1.59625	3.4273	3.48834	4.70904	9.31719	9.74444	19.0828	33.243	48.6544	66.0799	75.876	115.671	110.025
236	-0.5705	0.89434	3.30523	3.15264	4.55645	6.84527	9.16461	19.1133	31.9612	56.9551	65.9578	77.0662	115.61	114.603
236.5	0.37554	1.62677	3.09161	3.763	5.83819	7.30303	9.68341	18.6861	32.0223	56.5889	69.9251	82.5289	111.002	120.95
237	0.71124	1.5047	4.4649	3.39679	6.63165	7.63873	11.3619	17.5569	31.2288	52.5301	69.5894	93.4847	111.032	112.589
237.5	0.40606	0.58917	3.15264	3.30523	5.41094	6.90631	10.4769	15.2071	32.9073	46.7012	68.6434	91.2569	109.964	116.464
238	0.34503	1.38262	3.21368	3.97662	4.73956	6.90631	11.2398	14.1695	29.5809	48.99	68.4297	87.2896	107.981	118.784
238.5	0.40606	1.71832	3.97662	3.54937	4.34283	7.21148	11.7586	16.6719	25.1253	45.2364	75.9371	97.8792	107.004	130.838
239	0.71124	1.04693	3.30523	3.54937	5.44146	7.05889	11.2398	16.3362	25.1863	42.2762	71.2374	90.2193	93.9119	122.721
239.5	0.31451	1.01641	3.39679	3.51886	4.4649	7.85235	11.606	16.2752	27.0174	42.2457	73.16	105.203	88.846	128.488
240	0.22296	1.10797	3.36627	4.73956	4.03765	9.62237	12.0333	18.3504	24.1182	51.7061	77.585	94.0645	95.4683	118.173
240.5	0.61969	1.44366	3.9461	3.48834	4.67852	7.9439	12.1553	18.8692	23.4774	43.4969	75.6319	92.2334	97.8487	132.761
241	-0.41791	1.53521	3.97662	3.73248	4.55645	7.82183	10.5989	14.3831	26.1934	42.9781	74.8689	96.9026	109.751	127.207
241.5	0.71124	1.10797	3.61041	3.70196	4.77008	9.07305	12.3689	14.2916	31.2288	43.8326	78.3479	92.8133	101.114	136.057
242	0.9859	2.17608	4.12921	3.97662	5.62457	7.85235	11.1788	16.1531	32.5716	44.8702	78.6836	88.3882	102.64	130.197
242.5	0.80279	1.19952	3.30523	4.67852	5.41094	8.55426	12.6741	15.8174	31.3204	40.4146	67.6058	91.9588	95.0716	127.756
243	0.1314	1.29107	3.67144	4.61749	4.58697	7.63873	12.6741	14.7493	22.806	44.8702	73.4041	82.6509	101.358	128.732
243.5	0.07037	0.74176	3.97662	5.04473	5.13629	7.51666	14.9629	17.3433	26.2544	42.0626	74.93	83.9632	99.1609	133.951
244	0.22296	1.04693	3.36627	4.34283	4.52594	7.39459	13.2845	17.5875	27.8108	39.1634	69.7725	91.1043	88.6934	131.174
244.5	0.74176	1.26055	3.15264	3.91558	4.28179	7.85235	11.7281	17.7706	26.5901	35.5928	68.7654	95.7735	86.9539	128.397
245	0.92486	0.37554	3.2442	3.61041	6.17388	6.93682	13.315	16.855	27.292	43.8021	68.0635	92.4471	92.7522	121.774
245.5	0.03985	0.49762	3.61041	3.00006	5.34991	7.97442	14.0779	14.7798	31.9917	43.3748	69.6504	90.4634	79.5687	133.219
246	0.52813	1.01641	3.03057	2.48126	4.9837	8.03546	17.0687	14.2305	30.6795	46.4876	77.1883	98.9778	97.4519	145.334
246.5	0.00933	1.38262	3.33575	3.12213	6.26544	7.242	16.3973	16.1531	25.1558	52.8658	76.3033	91.6536	95.1937	152.841
247	-0.23481	0.4671	3.00006	2.87799	4.40386	6.99786	12.7657	15.4207	23.813	55.063	69.742	74.3807	102.884	153.787
247.5	0.40606	0.34503	2.78643	3.18316	4.00714	6.96734	13.0098	14.3221	25.0032	60.8309	74.93	80.0264	109.323	140.909
248	-0.78412	0.68072	2.45074	2.87799	4.03765	7.05889	14.261	16.2142	24.1182	61.7159	68.0025	68.918	113.992	136.331
248.5	0.07037	0.55865	3.09161	3.54937	3.91558	6.63165	14.3526	16.4888	29.3672	64.7676	71.3594	74.0144	107.309	131.906
249	0.25347	1.41314	3.00006	3.15264	3.33575	6.90631	12.2774	17.8316	25.0032	62.2347	64.9813	79.7518	114.725	133.92
249.5	0.19244	1.84039	3.21368	3.45782	4.06817	7.45562	12.0333	15.7869	28.2686	60.2205	63.2112	89.0596	102.579	133.249
250	-0.69257	1.77935	2.54229	3.33575	3.67144	7.242	13.5897	14.6883	30.6795	60.1595	64.0962	85.428	91.4095	138.956
250.5	-0.0517	1.5047	3.09161	2.51178	4.89215	7.05889	14.2	18.503	26.4986	63.8521	62.7229	88.3272	96.3228	142.313
251	0.28399	1.38262	2.96954	3.73248	4.31231	9.98858	16.0921	19.7847	26.285	63.2112	58.5421	92.386	84.7872	141.702
251.5	-0.50946	1.56573	3.36627	3.61041	4.37335	9.10357	15.9395	16.9771	25.1558	55.2156	52.5606	84.5125	99.9239	138.712
252	0.34503	1.10797	3.15264	3.82403	4.03765	9.07305	12.8878	19.2354	21.921	55.6429	55.0325	84.9703	96.5059	145.09
252.5	-0.11274	1.80987	3.45782	3.51886	3.64093	7.60821	11.5145	17.3738	26.6207	47.6473	60.8309	73.0379	103.555	162.18
253	0.03985	1.62677	3.57989	3.70196	4.4649	8.55426	13.3455	15.7564	26.4681	43.68	56.0091	82.834	93.5457	144.418
253.5	0.07037	0.34503	3.30523	3.36627	4.86163	8.18804	11.0567	14.8714	30.1912	46.2435	58.2369	82.2847	100.778	142.801
254	-0.11274	1.10797	3.09161	4.31231	4.49542	7.02838	10.4158	14.2305	30.6185	48.105	54.178	71.8172	101.084	121.958
254.5	0.40606	1.53521	2.60333	4.19024	4.43438	7.85235	11.9112	15.1766	33.2125	49.6919	58.481	73.2515	102.548	131.235
255	0.16192	1.23004	3.61041	4.34283	4.40386	7.51666	10.8126	16.2142	29.5809	48.8069	53.9339	80.9725	94.5833	136.789
255.5	0.43658	1.23004	2.87799	4.92266	4.34283	7.66925	13.5591	15.6038	28.3297	54.8189	57.9622	78.2564	94.3697	133.737
256	0.37554	0.77227	3.70196	4.00714	4.58697	7.82183	12.5215	14.5662	30.0386	54.5137	63.7911	61.899	97.8792	121.317
256.5	-0.20429	0.92486	3.61041	4.37335	4.09869	8.64581	13.0098	13.5591	28.5738	54.0865	54.6053	73.8619	90.3108	127.908
257	0.61969	1.01641	3.57989	4.34283	4.00714	8.2796	12.8878	13.4065	27.9329	44.6566	60.6172	77.7986	104.349	125.62
257.5	0.40606	1.65728	3.30523	4.40386	4.52594	9.46978	13.9864	14.6883	27.994	49.3563	56.1312	83.658	104.746	120.127
258	-0.17377	0.92486	3.30523	3.45782	4.00714	9.71392	12.3689	14.1084	31.5035	56.65	58.9388	81.2776	101.48	127.725
258.5	0.68072	1.62677	4.03765	4.95318	3.85455	9.89703	12.2164	14.2305	39.377	58.0232	61.2886	89.2732	97.7876	131.204
259	0.43658	1.96246	4.06817	3.91558	5.07525	10.2327	10.5989	19.7542	39.9263	53.4761	64.0352	78.409	91.6536	134.165
259.5	0.10089	1.53521	4.31231	4.73956	4.95318	10.0801	11.1177	18.9302	44.9312	52.7132	70.1387	62.9366	87.4727	137.796
260	0.55865	1.23004	3.39679	4.34283	4.92266	7.88287	10.4769	15.6343	37.7901	57.7791	66.7818	70.9932	92.2029	136.27
260.5	-0.0517	1.35211	4.70904	5.22784	5.47198	7.85235	12.5521	17.3128	32.5411	46.7623	63.8216	77.0662	90.9822	132.334
261	0.40606	1.13848	4.28179	4.61749	5.41094	8.85943	11.545	18.7471	33.0904	44.7176	57.9927	68.2161	80.4537	135.721
261.5	-0.32636	0.77227	4.15972	3.70196	4.34283	8.9815	11.9417	19.9983	33.8838	44.6871	54.7884	79.355	79.6297	135.324
262	-0.26532	0.95538	3.36627	3.36627	4.9837	8.58477	11.9417	20.1815	35.5928	50.0582	53.4456	96.1397	81.9185	117.655
262.5	0.22296	1.41314	3.57989	3.03057	4.95318	9.10357	11.9112	20.9139	36.8746	48.2271	53.5067	97.7266	87.2286	112.65
263	0.1314	0.77227	3.36627	3.39679	3.39679	8.37115	13.2234	22.9891	36.8135	45.9383	62.4788	87.0149	103.372	122.08
263.5	-0.11274	0.83331	3.763	3.9461	4.00714	8.06597	12.43	22.1041	31.9002	36.9661	67.087	87.7779	93.5762	122.629
264	0.00933	1.5047	3.45782	3.79351	3.61041	8.88995	13.1319	17.5569	28.1465	41.6658	66.9649	87.5032	101.541	102.579
264.5	0.07037	0.83331	3.48834	3.57989	4.25128	11.5145	10.6905	17.4349	31.1983	48.7459	64.0047	74.5332	102.579	107.218
265	-0.32636	0.68072	2.63385	3.27471	4.25128	9.83599	11.6365	14.0779	37.1492	51.6146	59.8543	85.5806	100.534	106.18
265.5	-0.14325	0.58917	2.26763	2.63385	3.54937	9.92755	11.5145	17.3433	41.5438	57.3213	65.0118	90.4329	103.586	104.99
266	-0.5705	1.44366	3.21368	3.45782	4.22076	6.44854	8.95098	17.5264	37.1797	59.2745	61.9295	91.6536	110.056	99.5577
266.5	0.22296	1.13848	3.33575	2.87799	5.04473	7.91339	9.56134	19.1133	34.2806	52.6827	64.6761	79.2024	110.178	103.617
267	0.49762	1.62677	3.39679	3.88507	6.08233	7.97442	9.83599	19.3575	32.48	48.4712	67.0564	89.1817	109.323	98.9778
267.5	-0.11274	1.44366	2.87799	5.04473	4.40386	8.40167	11.3008	18.8082	32.2969	52.2859	64.1573	90.0057	104.502	116.251
268	0.00933	1.47418	3.09161	3.54937	3.64093	7.69976	11.6365	13.8643	32.8768	57.5655	58.42	88.6018	102.213	117.746
268.5	-0.96723	1.5047	2.75592	3.27471	3.91558	7.27252	11.3314	14.261	36.4778	57.1382	51.8892	89.7005	101.114	121.164
269	0.4671	0.61969	2.78643	4.00714	4.12921	7.91339	11.6365	13.4981	32.7547	60.19	50.3939	89.0901	107.401	132.913
269.5	0.55865	0.86383	3.39679	2.87799	4.31231	7.51666	10.4464	13.0709	32.0528	61.4412	59.1524	82.2237	113.382	123.544
270	0.07037	1.5047	3.18316	3.763	3.763	8.06597	9.77496	12.6436	38.8277	60.6478	64.1573	78.0428	101.358	128.732
270.5	-0.72309	1.59625	3.82403	4.12921	4.49542	8.00494	10.782	14.8714	32.9378	58.4505	62.9061	78.9583	106.577	122.873
271	0.37554	1.5047	3.18316	4.28179	4.31231	8.76788	11.0872	17.5264	30.8016	53.9644	59.366	63.4249	102.762	128.305
271.5	0.03985	1.35211	3.54937	3.91558	4.28179	8.9815	10.2022	18.2283	27.2615	57.1077	71.0237	70.4744	108.469	143.381
272	-0.5705	1.44366	3.39679	4.58697	4.92266	10.0496	13.254	17.0076	27.5362	58.6031	57.9317	71.7562	95.0716	137.186
272.5	-0.47895	1.44366	3.73248	4.12921	3.88507	8.92047	12.9183	19.8152	29.1231	55.5208	59.2439	76.3643	101.816	134.043
273	0.25347	0.86383	4.06817	4.40386	4.43438	7.63873	12.2774	16.1837	29.0926	45.2669	64.8897	73.221	102.121	126.993
273.5	0.07037	0.95538	4.19024	3.79351	3.70196	7.51666	12.9488	14.4747	28.8484	42.4288	68.033	75.1436	99.1609	111.093
274	-0.84516	0.34503	3.51886	4.25128	4.09869	8.37115	11.9722	15.2376	28.6348	42.0931	66.3546	72.2139	88.4798	121.347
274.5	-0.02118	1.44366	3.67144	3.85455	4.73956	9.40875	13.7117	15.024	27.6277	38.7056	64.8592	68.0025	86.0994	125.345
275	0.25347	1.169	3.79351	3.51886	4.25128	8.76788	12.43	13.6202	27.9329	42.9781	66.4461	69.7115	90.5245	131.082
275.5	0.25347	2.48126	4.15972	4.67852	5.19732	9.46978	13.9864	14.3221	28.7874	45.8467	74.5943	69.5589	84.8482	124.735
276	0.68072	1.169	3.54937	5.34991	5.41094	7.88287	13.254	14.7798	26.9564	52.5911	71.4205	74.5332	88.1746	119.028
276.5	0.83331	2.14556	4.09869	5.41094	4.92266	7.69976	13.9559	16.7635	27.8108	44.3819	59.1829	70.7491	85.3365	118.997
277	0.25347	1.99298	3.21368	3.67144	4.4649	7.91339	13.1624	16.3973	28.2381	48.5323	52.3775	71.1458	75.9065	124.826
277.5	0.10089	1.80987	3.48834	4.92266	4.55645	9.89703	11.7891	17.4044	33.7313	47.3421	63.3333	73.9534	81.2776	134.043
278	0.10089	0.95538	2.96954	3.61041	5.59405	8.09649	11.2093	15.909	24.9117	53.3541	62.0821	76.2422	93.6372	134.775
278.5	0.6502	1.169	3.57989	3.51886	5.65509	9.68341	10.9346	14.6273	27.292	51.0652	69.2537	85.3975	93.0574	140.329
279	-0.26532	1.6878	3.36627	3.9461	5.01422	8.70684	10.6905	15.3902	29.1841	43.8631	68.0025	79.0193	84.1463	121.561
279.5	-0.20429	1.87091	3.27471	3.27471	4.34283	8.09649	11.2398	16.4278	25.9798	38.0037	64.4319	80.7283	98.4895	126.81
280	-0.32636	1.29107	3.70196	3.39679	3.82403	7.73028	11.8807	18.8387	30.4048	41.6963	60.6783	84.543	95.7735	132.059
280.5	0.80279	1.6878	3.12213	3.67144	3.9461	7.69976	10.6905	16.2447	27.9329	42.3067	70.9322	78.0122	90.4024	133.524
281	0.49762	1.19952	3.51886	3.33575	4.22076	7.30303	10.5074	15.8174	27.3531	44.8091	75.5098	86.9234	102.365	129.831
281.5	-0.69257	1.32159	4.03765	3.82403	4.43438	7.9439	10.9957	17.2518	27.5362	54.3916	76.7916	82.0101	106.943	132.059
282	-0.63154	0.86383	3.27471	4.15972	3.82403	7.39459	10.1412	13.7117	31.2288	52.7437	71.6036	72.8853	107.34	120.95
282.5	-0.5705	0.80279	3.2442	3.54937	3.70196	7.79132	9.40875	15.2376	28.7264	45.4195	62.7229	72.275	114.694	131.479
283	-0.44843	1.29107	4.03765	3.763	4.19024	7.79132	10.3853	13.8948	27.0479	53.6592	67.7278	76.6084	112.558	133.463
283.5	-0.66205	1.47418	3.2442	4.64801	3.91558	9.13409	10.5379	15.6038	21.0054	41.7269	72.9463	76.8221	112.528	123.331
284	-0.38739	1.35211	3.79351	4.64801	4.52594	8.73736	12.4605	19.388	20.6697	44.2903	71.1153	89.4258	116.678	129.984
284.5	0.49762	1.59625	3.85455	4.95318	5.28887	8.21856	12.7657	18.4725	24.5455	43.1612	71.6341	89.4258	109.995	121.622
285	-0.72309	1.10797	3.57989	5.62457	4.15972	7.27252	9.40875	18.1063	24.1792	47.3421	75.4183	82.3152	115.854	126.383
285.5	-0.50946	1.6878	3.51886	3.82403	4.9837	7.63873	9.04254	17.8316	23.4163	44.3209	69.0096	79.9654	110.391	121.469
286	-0.87568	1.62677	3.85455	3.51886	4.52594	7.85235	9.86651	18.8692	26.4681	50.6685	68.2772	83.7801	104.563	133.493
286.5	-0.75361	1.13848	3.57989	3.54937	4.37335	6.78424	9.59185	18.8387	27.8414	51.6146	65.1338	77.2188	101.999	125.864
287	-0.81464	1.77935	3.73248	4.12921	3.61041	6.81475	9.71392	18.3809	28.8484	55.063	66.5682	79.9654	98.2149	118.54
287.5	0.49762	1.59625	3.39679	3.85455	3.79351	5.86871	10.8431	16.733	31.1678	52.9879	64.3709	82.0101	97.6045	123.392
288	0.49762	1.13848	4.00714	3.12213	4.03765	5.96026	10.2938	17.4654	37.0882	52.2859	66.263	82.5594	103.403	126.322
288.5	-0.29584	1.6878	3.64093	4.03765	3.79351	6.57061	10.8126	16.9466	33.9144	57.0772	69.5284	75.4488	109.72	122.751
289	-0.14325	0.9859	4.00714	3.85455	4.06817	7.18096	11.2703	19.6321	37.7291	53.3541	64.7676	68.8875	125.253	126.2
289.5	0.40606	1.56573	4.19024	3.18316	5.34991	7.63873	11.8196	20.0899	31.8087	51.0958	74.106	70.7185	112.314	136.575
290	-0.08222	1.62677	4.4649	3.73248	4.15972	7.11993	13.1929	19.8458	34.7994	48.044	71.4815	76.4559	99.7713	133.066
290.5	0.10089	1.07745	3.51886	3.48834	3.97662	6.7232	13.1319	20.9139	35.7759	48.2881	68.5213	82.6509	98.4285	128.549
291	-0.87568	1.77935	3.82403	4.15972	4.67852	7.33355	11.2703	23.2027	38.2479	46.8233	65.6832	87.2896	100.382	134.989
291.5	0.25347	1.53521	3.33575	3.54937	4.25128	6.96734	11.4229	24.4844	31.1067	45.2669	66.7208	81.3692	108.56	125.589
292	0.00933	1.90142	4.22076	3.88507	4.86163	7.11993	10.3853	20.9749	32.2969	45.6331	71.2679	87.6253	102.121	127.268
292.5	0.00933	2.05401	4.52594	4.09869	5.10577	7.9439	12.8878	20.4561	32.4495	46.6097	65.8358	87.0149	105.57	119.974
293	0.03985	1.29107	3.82403	4.70904	3.9461	7.82183	12.7047	20.1815	28.4517	48.0135	68.7349	77.7681	120.676	122.324
293.5	0.07037	1.38262	3.15264	3.91558	4.73956	7.48614	11.8501	19.1439	28.8484	49.9971	79.8128	78.0733	118.875	142.313
294	-0.08222	1.19952	3.97662	3.70196	4.89215	7.73028	12.5521	17.9842	36.9661	41.8794	72.1224	76.0591	108.194	144.602
294.5	-0.44843	1.59625	3.91558	4.03765	4.83111	7.48614	12.0027	19.1133	41.5132	45.45	75.1741	76.8221	111.49	139.841
295	-0.17377	1.41314	4.67852	3.51886	5.10577	7.08941	11.0567	17.4959	34.6773	46.7623	80.9419	82.1626	97.2688	125.131
295.5	-0.38739	1.71832	3.57989	3.09161	5.19732	6.57061	11.545	16.5193	38.1258	44.8091	82.1016	82.4678	101.389	138.071
296	-0.32636	1.19952	3.9461	3.79351	3.85455	7.33355	11.1788	15.1766	33.4261	46.7012	69.2537	88.6324	100.443	136.27
296.5	0.16192	0.89434	3.763	3.21368	4.12921	7.33355	9.43927	14.2	33.2125	44.626	74.5332	90.616	113.687	136.911
297	-0.08222	1.32159	4.34283	4.03765	3.79351	8.09649	9.98858	14.6883	29.825	43.68	75.7845	86.6792	106.485	134.958
297.5	-0.90619	0.92486	3.91558	3.36627	3.88507	7.7608	10.0496	16.0005	31.5645	40.262	75.9065	80.8504	103.586	125.711
298	-0.53998	1.01641	4.09869	3.27471	4.31231	6.90631	9.95806	15.2681	30.3743	42.2457	77.4019	75.815	100.229	137.064
298.5	-0.23481	1.19952	4.31231	3.54937	4.28179	6.32647	8.95098	14.8714	27.9329	46.0604	70.566	78.2564	103.037	131.784
299	-0.5705	0.58917	3.97662	3.4273	4.40386	7.57769	9.43927	15.848	29.1841	38.5225	78.8973	68.4603	102.701	144.113
299.5	-0.20429	1.23004	3.57989	3.30523	4.61749	6.11285	9.74444	16.4583	30.8931	44.3514	74.3501	59.7017	98.459	142.832
300	0.1314	0.92486	4.12921	3.36627	4.00714	7.18096	9.37823	16.2142	35.5623	41.6658	69.8946	56.1922	88.8765	145.09
300.5	0.19244	1.13848	3.85455	3.30523	4.89215	7.18096	8.55426	16.5499	37.7291	43.9852	69.1316	64.3099	93.1184	141.55
301	0.80279	1.35211	4.28179	2.66436	4.80059	8.09649	8.64581	16.3973	39.0718	42.4898	75.6929	74.8384	100.015	145.059
301.5	-0.32636	0.22296	4.06817	3.15264	4.22076	7.21148	8.37115	15.909	32.6021	48.6238	76.2117	77.3714	109.354	144.998
302	0.07037	1.10797	3.4273	3.2442	4.95318	7.45562	8.88995	13.7422	32.3885	51.0958	82.0711	72.5801	108.377	141.367
302.5	0.16192	0.74176	4.00714	3.54937	5.10577	7.11993	8.92047	13.9559	29.6114	52.8047	88.2662	72.3055	102.518	134.989
303	0.00933	1.53521	4.4649	2.75592	4.00714	7.54717	8.67633	12.7962	29.3978	47.6168	85.8858	65.4695	100.229	148.447
303.5	0.16192	1.29107	4.40386	3.4273	4.61749	9.10357	8.52374	13.9559	23.9962	52.0113	73.8619	76.0897	93.5152	144.663
304	0.25347	1.62677	4.15972	3.85455	4.43438	7.30303	10.7515	16.0005	22.1651	48.4712	68.3077	77.7681	92.9048	155.435
304.5	0.49762	1.74884	4.06817	3.4273	4.70904	7.4251	11.545	15.3292	30.649	49.2037	72.0918	87.8389	87.1065	148.569
305	0.40606	0.55865	4.12921	2.84747	3.51886	8.24908	11.5755	15.2986	34.9214	53.293	77.2188	83.5054	91.0127	139.261
305.5	0.19244	0.43658	4.06817	4.22076	4.28179	7.69976	9.25616	17.618	35.1961	53.3541	64.1573	82.2542	94.2476	136.728
306	0.10089	1.19952	4.19024	4.55645	4.80059	7.33355	9.46978	16.794	36.3863	51.7977	76.8526	85.3975	104.044	135.568
306.5	0.00933	1.44366	4.55645	4.80059	4.22076	7.91339	10.0801	17.1297	38.7972	50.2718	81.5523	76.6695	114.389	137.338
307	-0.44843	1.90142	4.34283	4.25128	4.43438	8.2796	10.6295	17.2518	39.0108	47.4337	74.8689	79.7212	105.112	147.012
307.5	0.92486	0.95538	5.19732	5.13629	3.64093	7.48614	10.1412	16.6719	38.7666	43.4969	77.0662	79.4161	100.199	140.787
308	-0.29584	1.23004	4.43438	6.23492	4.43438	9.31719	10.2938	18.2283	38.0647	53.2625	81.2776	80.3621	87.076	138.59
308.5	0.68072	1.93194	4.34283	5.28887	5.07525	9.40875	12.0943	16.0005	37.3934	50.4854	77.2798	73.6482	88.5408	131.357
309	0.55865	1.87091	4.95318	4.03765	4.55645	9.46978	12.0638	15.3902	38.0953	51.462	75.4488	74.045	85.9773	133.951
309.5	0.61969	1.74884	4.9837	4.25128	4.83111	8.58477	11.7586	16.7024	41.8489	53.1404	82.0711	71.6951	79.7212	125.894
310	-0.14325	1.65728	4.40386	5.38043	5.34991	7.9439	11.3619	16.4583	37.2103	45.8467	84.7261	76.2422	88.3272	118.356
310.5	0.58917	0.80279	4.52594	4.19024	4.67852	7.7608	9.98858	17.679	29.3062	45.1143	78.3785	75.6319	90.0667	135.66
311	0.55865	1.23004	4.61749	3.91558	4.49542	9.5003	8.9815	15.97	30.4048	42.8865	73.0379	79.2635	90.4939	140.329
311.5	0.92486	0.9859	4.28179	4.09869	4.4649	9.16461	10.0191	15.2681	27.2005	35.6844	81.064	82.6814	90.1888	133.676
312	0.03985	1.10797	4.09869	3.12213	4.22076	7.4251	10.0496	14.8409	28.2686	38.7972	77.2493	78.8057	106.119	129.373
312.5	-0.35688	0.74176	4.22076	4.28179	4.4649	8.55426	10.4464	16.0005	34.9214	45.6636	83.2918	74.2891	105.264	128.885
313	-0.35688	0.92486	3.97662	4.09869	5.13629	7.54717	9.34771	15.3292	29.0315	55.5208	81.6133	76.2728	101.419	117.41
313.5	-0.26532	0.58917	4.12921	4.43438	5.01422	7.05889	9.46978	17.0076	36.6915	58.6031	81.4302	78.8362	95.5904	103.983
314	-0.50946	1.23004	3.79351	4.55645	3.91558	7.57769	11.2703	18.7471	33.6092	56.1006	80.9725	74.9605	101.999	109.354
314.5	-0.93671	1.169	4.12921	4.09869	4.64801	7.60821	12.8572	17.9231	33.365	58.0232	77.6766	72.9463	103.037	127.359
315	-0.11274	1.01641	4.28179	4.09869	4.28179	9.71392	10.4158	18.3809	33.8838	52.1028	79.2635	79.2635	98.459	130.136
315.5	-0.26532	1.38262	3.70196	3.73248	3.12213	8.73736	10.721	17.7401	32.9988	49.2647	77.4629	84.7261	104.135	130.747
316	-0.35688	0.28399	3.48834	4.09869	3.73248	8.09649	8.24908	17.3128	33.8533	49.7835	79.7823	79.6602	98.6727	141.886
316.5	-0.02118	0.25347	3.85455	4.58697	4.31231	8.4627	9.98858	16.0921	35.4708	45.6026	69.3758	84.6956	93.149	141.733
317	0.16192	1.04693	4.28179	5.6856	4.00714	7.36407	8.61529	16.3667	32.4495	51.1263	60.7393	86.5267	76.4253	115.946
317.5	0.34503	1.07745	4.19024	4.64801	5.1668	8.18804	8.58477	14.8104	27.2615	47.6473	60.5562	78.9583	73.8313	104.746
318	0.34503	0.58917	3.57989	4.31231	4.4649	9.46978	9.68341	17.4959	23.2637	39.6212	69.742	87.9305	80.118	123.056
318.5	0.00933	1.6878	3.97662	3.67144	5.25836	8.85943	11.0872	17.2823	25.7967	39.377	72.6717	80.3621	80.3621	122.263
319	-0.0517	1.10797	4.25128	3.51886	4.83111	7.11993	13.8338	15.8785	26.8953	37.607	75.1131	82.2542	80.1485	127.481
319.5	-0.78412	1.90142	4.15972	3.64093	4.77008	7.05889	11.606	16.9161	34.0364	43.4358	76.2728	82.5899	86.8013	133.859
320	0.71124	1.5047	4.55645	3.97662	4.64801	7.05889	11.1483	21.097	38.8277	42.5203	79.3245	90.2803	98.9778	123.941
320.5	0.6502	1.90142	4.49542	3.82403	4.37335	7.21148	11.4534	22.0735	40.2315	46.5486	84.8482	95.0411	100.321	127.97
321	-0.02118	1.13848	3.4273	3.64093	4.89215	8.2796	9.71392	23.5079	35.074	52.9268	89.5479	90.616	93.0879	137.186
321.5	-0.17377	1.41314	4.86163	3.4273	4.52594	8.52374	12.0943	21.3411	33.304	51.7977	82.4678	90.3414	104.013	142.374
322	-0.08222	1.19952	4.28179	3.2442	4.52594	8.31011	13.4065	17.1297	33.0599	51.1568	75.5403	86.4656	107.065	134.714
322.5	0.55865	1.56573	3.97662	3.4273	4.15972	7.18096	11.9417	16.9466	32.8768	55.2767	69.8335	78.8667	93.6067	128.702
323	0.16192	1.44366	4.03765	4.22076	4.22076	7.88287	11.4839	15.6343	29.4588	52.5911	74.4112	82.773	97.2078	118.295
323.5	0.07037	1.26055	4.80059	3.763	5.10577	7.63873	11.5145	15.8785	30.4354	45.5416	76.1812	79.1719	89.792	112.619
324	0.4671	1.44366	4.31231	4.67852	4.80059	7.91339	10.2938	17.1297	33.5176	52.8963	79.8738	83.4749	104.105	109.476
324.5	0.1314	0.95538	4.73956	4.9837	4.40386	8.00494	10.5684	16.2142	33.8838	46.3655	70.3523	76.8831	100.778	118.448
325	0.9859	0.9859	5.01422	5.10577	4.15972	8.34063	11.2703	16.5804	32.2054	44.8091	71.9087	77.6155	97.8487	118.692
325.5	0.58917	1.07745	5.22784	4.28179	4.40386	7.57769	13.1014	14.4442	34.4942	52.1028	74.7774	82.6204	96.5364	109.72
326	0.31451	1.19952	0.95538	3.03057	5.56353	7.45562	11.7586	16.2142	36.2642	52.1028	75.2962	83.9022	102.762	111.063
326.5	0.10089	2.2066	1.56573	4.92266	5.5025	7.33355	12.2164	16.733	40.7808	56.711	80.2706	81.3692	100.565	119.119
327	0.49762	2.29815	0.31451	4.70904	5.28887	8.58477	12.3384	16.0005	38.2173	53.8729	93.5152	82.5594	104.471	122.537
327.5	-0.17377	1.77935	0.9859	4.34283	5.19732	7.91339	13.254	15.6038	40.4756	58.7251	84.2073	85.0313	98.1844	111.002
328	0.43658	1.93194	1.07745	4.28179	4.43438	7.51666	14.1695	16.6109	39.4686	53.8423	77.3409	77.4324	96.4143	110.941
328.5	-0.69257	1.71832	2.23712	3.03057	4.43438	7.97442	14.0779	14.8409	36.3558	60.0374	72.9463	82.3152	102.365	94.3086
329	0.31451	1.74884	0.77227	3.61041	4.09869	7.73028	13.4981	14.4136	36.0506	63.3028	74.8384	81.3692	101.785	106.302
329.5	0.07037	1.26055	2.84747	3.61041	4.34283	7.82183	15.7869	15.1461	43.4053	50.6685	67.8804	74.6553	95.5904	110.3
330	-0.23481	1.07745	1.90142	3.33575	4.25128	6.96734	14.2305	16.2752	37.9122	55.0936	83.5665	66.4766	95.3768	119.516
330.5	0.31451	1.44366	2.60333	3.06109	3.73248	7.66925	13.2234	17.1907	42.6119	50.2107	83.0782	70.1082	98.0013	119.73
331	-0.08222	1.5047	1.47418	2.3897	4.22076	8.00494	13.254	19.5406	38.553	48.5018	76.2117	61.014	104.532	119.821
331.5	0.07037	1.35211	2.32867	3.9461	4.67852	8.00494	14.5662	18.7471	40.2925	63.4249	70.9017	63.6385	103.403	117.807
332	0.00933	1.04693	1.71832	2.3897	4.09869	7.36407	16.0921	20.5782	35.8064	61.7769	70.3829	74.2281	93.271	128.061
332.5	-0.44843	1.44366	1.74884	3.67144	4.19024	7.48614	15.024	18.4419	37.0577	54.2086	72.4275	74.2586	85.9773	130.106
333	-0.0517	1.13848	3.30523	3.85455	4.52594	7.08941	11.2093	20.4866	35.1046	55.9175	71.9087	74.0144	85.1228	127.634
333.5	0.52813	1.32159	2.66436	3.763	4.09869	8.06597	11.3008	18.0147	34.6163	43.0696	61.2276	80.4842	83.6885	120.981
334	-0.41791	1.44366	2.9085	3.82403	4.31231	9.71392	12.8267	17.9537	38.1868	48.4102	65.2254	76.7916	92.264	121.225
334.5	-0.08222	0.61969	3.09161	4.4649	3.9461	8.9815	15.2071	22.1346	35.837	47.7999	59.5186	72.397	80.5147	112.253
335	0.4671	-0.32636	2.66436	2.7254	3.45782	7.7608	15.5123	20.1509	41.5132	42.6119	64.3404	79.8738	94.919	113.535
335.5	0.28399	1.80987	2.96954	2.75592	4.28179	7.11993	13.3455	19.8763	35.8064	47.2811	70.8101	84.7261	100.321	126.138
336	-0.69257	0.52813	2.26763	3.18316	4.55645	7.82183	15.0545	19.2049	34.7078	67.8194	76.761	81.5828	101.602	122.629
336.5	0.55865	0.74176	2.2066	2.48126	4.03765	8.67633	16.4278	20.5172	37.1187	67.0259	79.8128	92.8133	106.79	116.648
337	0.61969	0.6502	1.93194	2.87799	4.52594	8.73736	14.2305	17.2213	34.8299	65.8968	82.6204	89.731	96.8416	132.761
337.5	0.16192	1.44366	2.9085	3.27471	4.52594	7.33355	14.7188	17.8316	35.1961	67.0259	71.0542	80.5452	98.1233	140.085
338	0.61969	1.13848	2.08453	3.54937	4.58697	7.21148	12.0638	18.4419	30.71	68.4908	66.0799	67.0259	102.243	141.184
338.5	0.58917	1.77935	2.87799	3.45782	4.52594	7.48614	11.2093	18.7166	33.8838	64.7982	71.9698	68.6739	94.4307	125.009
339	0.34503	2.05401	3.2442	3.39679	5.07525	6.66217	13.1929	21.5242	35.4402	54.4527	79.9043	81.7659	94.5833	123.941
339.5	0.68072	2.02349	3.03057	3.12213	4.28179	7.51666	13.6202	16.5193	31.0457	60.0069	83.1087	83.8411	90.677	123.88
340	0.55865	2.05401	3.21368	2.93902	4.15972	7.36407	11.9722	16.733	31.2288	49.4173	81.9795	87.9	99.9544	124.277
340.5	0.80279	1.96246	2.63385	2.96954	4.37335	8.06597	11.7891	17.2518	27.6277	49.3257	86.3435	80.7893	109.628	135.996
341	1.04693	1.5047	3.27471	3.30523	4.55645	8.15753	12.8572	17.1297	30.8016	52.9268	87.5337	84.1463	105.051	143.533
341.5	0.58917	2.08453	3.27471	3.27471	5.25836	8.43219	11.2093	17.1602	36.4778	55.5208	83.0171	81.7354	108.072	138.193
342	0.86383	2.02349	4.12921	3.9461	6.14337	9.25616	11.9112	17.679	36.0506	52.4385	79.4771	91.7452	97.1468	128.183
342.5	0.83331	2.45074	3.54937	3.45782	5.13629	8.37115	11.3924	18.6556	26.7122	56.5584	74.8079	97.2078	100.534	137.766
343	1.90142	1.56573	3.15264	3.51886	5.71612	7.36407	11.3008	20.5172	26.9564	51.2483	62.8145	96.9637	89.4869	142.282
343.5	0.55865	2.02349	3.64093	4.31231	6.60113	7.39459	11.8501	17.8316	25.522	44.0462	69.3453	94.2781	98.8558	128.885
344	0.43658	1.47418	3.54937	3.00006	5.25836	7.36407	13.0098	14.9629	32.6631	52.8047	67.9109	81.2471	96.4143	131.967
344.5	0.92486	1.169	3.61041	3.79351	6.14337	7.33355	13.8338	19.327	39.8653	48.8069	71.573	85.0008	102.518	119.18
345	-0.53998	1.96246	3.67144	3.54937	5.89923	8.82891	12.0638	17.5875	37.3934	45.6636	68.5518	98.8252	102.823	127.237
345.5	0.25347	1.26055	4.25128	2.69488	3.82403	8.09649	12.6131	16.0311	36.5694	54.1475	60.9224	102.152	92.325	106.882
346	-0.0517	1.47418	2.78643	3.18316	4.55645	7.85235	12.2164	16.4278	38.3394	54.4527	65.0118	100.107	87.2896	129.801
346.5	0.1314	1.99298	3.00006	3.85455	5.01422	6.38751	14.9629	14.6273	31.1678	49.3868	63.9742	97.6961	85.0923	138.864
347	-0.47895	1.5047	2.81695	3.18316	4.09869	6.99786	13.5286	17.6485	34.0364	49.9666	69.9861	97.3299	86.313	129.19
347.5	-0.35688	1.169	3.03057	3.27471	4.12921	7.88287	10.9041	17.679	33.4261	48.1356	70.0166	86.8318	85.8247	114.237
348	-0.66205	2.08453	2.96954	3.09161	3.27471	8.58477	9.07305	16.8855	40.3841	49.8445	74.2891	83.8106	88.2051	111.032
348.5	-0.20429	-0.78412	2.96954	4.06817	3.88507	8.88995	9.10357	19.327	36.2642	45.6026	69.6809	92.2334	88.9986	111.307
349	-0.84516	-2.00483	3.79351	4.25128	3.45782	6.7232	9.22564	19.8152	38.3089	40.5062	63.3943	87.0149	101.755	114.755
349.5	-0.11274	-1.94379	3.18316	2.87799	3.27471	6.96734	10.5684	18.4419	36.722	34.7078	58.3895	84.9397	118.204	120.035
350	-0.63154	-3.10346	3.33575	3.21368	3.27471	8.21856	10.9346	16.5193	34.9825	38.7056	74.167	83.9327	122.568	123.88
350.5	-0.72309	-3.65278	3.18316	3.21368	4.03765	9.53082	13.8033	18.1673	39.4686	32.5106	69.9251	85.4891	107.645	128.122
351	-0.93671	-3.46967	3.88507	3.30523	4.06817	10.1412	12.4605	19.1133	41.4827	31.9002	72.8853	81.7354	103.525	128.061
351.5	-0.17377	-2.79828	3.2442	3.27471	4.03765	8.92047	12.0638	17.2213	43.5884	42.5814	72.0613	73.8619	90.7686	126.657
352	-0.0517	-4.0495	3.79351	3.36627	3.91558	10.5684	11.8501	17.3433	43.5884	41.3912	78.9278	78.3174	96.2923	121.378
352.5	0.22296	-2.85932	4.09869	3.00006	4.64801	8.34063	12.2469	18.0757	44.7176	44.3209	79.7212	84.6956	102.762	124.033
353	-0.96723	-2.67621	3.91558	3.12213	5.44146	9.46978	12.7962	18.7166	39.8653	48.2271	80.4537	74.7164	89.792	138.01
353.5	-0.63154	-2.18793	3.82403	3.45782	5.89923	9.89703	12.8572	18.1063	41.8794	47.0979	84.1768	68.6739	103.372	132.852
354	0.31451	-2.61518	3.12213	4.06817	5.25836	8.9815	11.2703	15.8785	40.5672	46.6402	87.2591	69.1316	99.9239	124.094
354.5	0.03985	-2.61518	3.79351	3.21368	4.89215	10.0496	9.95806	17.5264	35.5928	48.3797	89.0901	71.6036	109.812	122.537
355	0.40606	-2.15741	3.09161	4.34283	5.62457	8.52374	11.4534	19.2049	31.3509	39.4991	94.3086	81.9185	111.246	125.467
355.5	0.55865	-2.09638	3.48834	4.28179	5.31939	8.12701	15.5428	17.2823	32.48	44.504	83.3528	89.0596	111.582	118.082
356	-0.14325	-2.79828	3.54937	3.67144	5.41094	6.90631	15.5428	19.2659	29.2146	49.5394	82.3763	88.0831	108.56	115
356.5	-0.02118	-2.46259	3.30523	3.30523	4.73956	7.88287	17.1297	18.8692	28.6043	57.8707	83.597	93.9119	100.778	115.091
357	0.31451	-2.49311	3.91558	2.87799	4.49542	5.34991	17.618	16.3667	37.7901	54.3611	75.2657	93.0879	114.359	115.793
357.5	0.83331	-2.03534	4.03765	3.18316	3.85455	4.86163	16.794	16.0005	33.6397	61.1971	78.1343	92.5691	114.42	121.012
358	0.40606	-2.58466	4.09869	3.54937	4.00714	5.1668	17.0381	15.3597	35.1046	57.1382	78.3785	84.9092	105.325	123.178
358.5	0.49762	-2.40155	5.07525	3.18316	4.9837	4.80059	17.5875	15.4207	32.6021	44.4124	77.6766	82.6814	102.64	127.481
359	0.68072	-1.69965	3.763	2.9085	4.67852	7.79132	14.2	16.5193	37.4544	37.7901	79.9959	84.2378	93.271	128.763
359.5	0.89434	-1.57758	4.19024	4.09869	4.9837	7.66925	13.8948	17.1602	31.2593	46.7012	73.1905	77.7376	94.2171	127.359
360	0.03985	-1.51654	5.01422	3.45782	5.86871	7.30303	12.5521	16.3057	34.2195	44.4734	82.3763	71.9087	90.7076	115.183
360.5	-0.17377	-1.66913	4.31231	3.82403	5.07525	7.242	11.8807	16.9161	33.243	51.7061	84.2073	71.7562	88.7239	109.079
361	1.01641	-0.66205	4.4649	2.96954	5.07525	6.96734	11.9112	17.3433	33.3345	51.5535	83.4444	73.6788	88.6629	110.575
361.5	0.92486	-1.15033	3.9461	3.91558	4.40386	8.06597	15.5123	19.1439	30.0081	49.9361	82.3763	66.2935	78.1038	119.058
362	0.52813	-1.88276	3.18316	3.54937	4.58697	6.60113	13.4676	16.3973	30.2828	50.7296	77.524	63.608	81.949	126.016
362.5	0.1314	-0.81464	3.57989	3.15264	4.9837	6.50958	15.5428	17.1297	31.6866	51.0042	70.627	69.1011	89.3953	123.85
363	0.37554	-1.7912	4.25128	3.33575	4.49542	6.23492	12.5215	16.4278	29.001	40.4451	66.1104	77.1578	92.6302	125.833
363.5	0.52813	-1.51654	4.12921	2.96954	4.03765	5.34991	12.0638	15.6343	28.2991	47.8609	70.8711	77.2493	83.2613	113.596
364	-0.32636	-1.73017	3.45782	3.61041	4.19024	5.89923	10.5074	14.4136	32.6326	46.4876	80.0569	82.3152	97.7876	109.934
364.5	0.1314	-1.85224	4.09869	3.30523	4.12921	5.34991	11.5755	14.0779	31.2899	46.8233	86.4046	83.8106	96.1702	112.65
365	0.71124	-1.97431	2.66436	2.3897	4.19024	5.71612	10.9041	17.1602	30.9847	46.335	97.1163	88.0831	105.356	123.85
365.5	0.1314	-1.76069	3.64093	2.7254	3.91558	5.47198	10.9957	17.679	31.3509	44.0462	94.3086	77.2188	100.839	131.296
366	0.61969	-1.02826	4.55645	2.54229	4.06817	7.69976	10.8736	18.8082	31.5035	46.5486	87.076	76.2422	105.844	134.867
366.5	-0.53998	-0.87568	3.03057	3.4273	4.15972	9.71392	13.4065	16.0005	30.9847	44.1377	103.037	73.6788	97.574	127.939
367	0.4671	-0.75361	4.09869	3.18316	4.25128	8.21856	12.6131	15.3902	25.7662	37.7596	104.44	80.4537	105.234	138.468
367.5	-0.02118	-0.69257	3.21368	2.42022	4.52594	8.00494	14.261	15.97	26.5901	39.9874	95.2547	79.5076	95.0716	132.089
368	-0.41791	-1.02826	3.27471	3.2442	4.67852	6.57061	14.9324	14.8104	29.2757	46.1519	96.3228	77.4324	103.311	116.983
368.5	0.86383	-0.5705	3.79351	3.12213	4.06817	6.17388	17.8926	15.8174	25.4	46.5791	88.6018	76.8221	106.821	113.138
369	0.31451	-0.41791	3.85455	2.96954	3.91558	8.18804	16.794	16.2447	32.358	52.1028	85.7332	81.888	110.513	106.76
369.5	0.19244	0.25347	4.34283	3.48834	4.67852	7.36407	19.449	13.1929	32.7547	49.2952	83.9327	79.6907	114.664	107.919
370	-0.44843	-0.0517	4.12921	3.79351	4.15972	7.54717	16.794	13.2234	27.0784	54.117	87.5032	82.6814	107.157	130.014
370.5	-1.02826	-0.38739	3.54937	3.51886	3.73248	8.9815	18.9913	15.8174	28.5738	50.7296	85.3059	82.2542	104.44	129.434
371	-0.41791	-0.0517	3.70196	3.09161	4.34283	8.2796	17.0992	18.7166	29.9166	50.9432	92.8133	80.8199	91.9588	118.997
371.5	0.03985	-0.11274	4.09869	3.48834	3.97662	8.24908	18.3199	18.8082	28.8179	50.3939	90.677	90.7686	85.7942	126.505
372	-0.35688	-0.14325	3.48834	3.54937	4.34283	7.85235	17.4349	16.2142	28.6043	54.2696	86.0689	100.717	90.616	119.455
372.5	-0.63154	0.00933	3.30523	3.73248	4.77008	9.62237	18.7166	17.4044	31.4424	49.1731	83.3528	98.0928	94.6443	118.845
373	-0.44843	-0.66205	3.73248	3.97662	3.763	7.36407	14.8104	18.7166	26.346	54.3916	82.4678	101.236	87.5948	121.103
373.5	0.37554	-1.51654	3.85455	3.48834	4.40386	8.03546	14.9629	16.733	26.9258	51.7671	74.5027	91.9588	89.8531	117.838
374	-0.23481	-1.2724	4.15972	2.93902	5.5025	7.54717	14.0779	16.1531	32.9073	52.6216	79.8433	95.5904	82.6509	135.996
374.5	-0.02118	-1.33344	4.03765	3.97662	5.99078	7.66925	14.139	17.4349	34.3416	49.2342	75.754	85.2754	92.5997	135.172
375	0.55865	-0.29584	5.13629	3.61041	6.32647	7.91339	13.5897	19.9678	30.3743	42.5203	81.3997	82.1932	91.0127	137.674
375.5	0.31451	-0.66205	4.31231	4.37335	5.96026	7.15045	12.0027	22.9891	31.0762	37.6375	81.6744	95.5904	88.1441	124.521
376	-1.02826	-0.38739	4.83111	3.2442	6.78424	7.21148	14.5967	22.2567	28.5433	47.7693	85.9468	95.5904	96.2007	130.35
376.5	0.25347	-0.84516	4.37335	4.25128	6.23492	8.12701	14.261	17.9842	32.48	50.4854	91.0433	98.4895	94.7359	143.381
377	0.71124	-0.93671	4.52594	3.88507	5.6856	7.66925	12.0027	19.9068	32.7852	45.1754	98.2454	86.7403	92.6607	133.859
377.5	0.00933	-0.38739	4.28179	4.03765	5.99078	6.78424	13.7117	22.1041	27.8719	48.9595	99.4356	96.3228	85.6416	128.092
378	0.77227	-0.32636	4.89215	4.06817	4.12921	6.47906	9.74444	20.212	21.7073	53.6287	98.5811	83.8411	84.9703	134.104
378.5	0.40606	-0.08222	5.04473	3.82403	4.25128	7.02838	11.667	19.8458	20.2425	50.7906	93.8204	88.9376	93.9119	136.82
379	0.31451	1.44366	4.49542	3.15264	4.25128	7.39459	11.8501	22.5618	28.2991	51.3094	87.5337	92.2029	88.6018	130.167
379.5	-0.63154	1.71832	5.1668	2.75592	4.67852	6.38751	13.1929	19.8458	24.0572	54.3306	81.5828	94.2171	95.2547	129.007
380	0.10089	0.16192	4.4649	2.9085	3.73248	6.90631	10.6295	15.6038	27.5362	50.9432	83.658	90.8296	92.2029	124.002
380.5	0.22296	-0.69257	4.52594	3.27471	4.43438	6.93682	10.4158	16.0921	26.9258	52.4385	85.5196	93.8204	91.8978	119.119
381	-0.08222	0.4671	4.00714	3.27471	4.28179	6.44854	15.085	17.4959	26.4376	48.1356	83.2002	98.8863	92.8743	118.845
381.5	-0.20429	1.04693	3.51886	2.78643	3.763	5.92974	16.5804	19.3575	25.2474	42.2151	77.4934	92.8438	103.464	130.533
382	-0.90619	0.07037	4.61749	3.73248	4.37335	5.34991	12.491	19.8458	29.5198	40.5672	71.2068	90.6465	96.6585	125.742
382.5	-0.08222	-0.0517	4.49542	2.87799	4.61749	5.62457	13.2845	19.5711	32.5106	41.3606	69.7115	91.6231	92.6607	126.352
383	-0.32636	0.00933	4.25128	3.91558	4.03765	5.96026	13.1624	21.7989	33.6092	44.1377	71.2374	87.1675	103.525	124.887
383.5	0.1314	0.03985	4.40386	3.21368	3.48834	5.83819	13.8643	20.6087	33.8838	49.0511	74.1365	86.8013	102.152	128.397
384	-0.60102	0.34503	5.10577	3.57989	5.07525	6.75372	12.3689	19.5406	29.1841	46.1214	70.0472	78.0428	102.182	121.225
384.5	-0.87568	-0.41791	3.67144	3.33575	5.62457	6.08233	10.1106	21.8599	27.231	45.1754	66.2325	81.949	101.267	118.967
385	-0.29584	-0.41791	4.22076	3.48834	5.74664	5.53302	11.606	19.388	26.1629	43.8631	75.4793	83.7496	98.9473	123.972
385.5	-0.08222	-0.29584	4.25128	2.87799	5.99078	6.23492	10.3548	17.3433	27.4446	41.5743	77.4019	85.2754	98.6421	124.185
386	-0.99775	0.92486	3.97662	3.30523	5.56353	6.14337	12.1248	17.4044	26.5596	40.3841	80.5452	81.2166	99.344	115.701
386.5	-0.72309	0.52813	3.64093	2.87799	4.03765	6.11285	11.667	17.9537	26.285	42.7034	80.4842	76.4864	82.0406	117.227
387	-0.02118	-0.02118	4.09869	3.82403	3.763	5.99078	15.9395	18.6861	28.7264	50.3633	73.0989	70.1082	94.1866	120.645
387.5	0.00933	-0.69257	4.4649	3.09161	4.61749	6.50958	15.0545	18.3809	27.17	51.462	81.1251	73.2515	92.7217	118.997
388	-0.75361	0.10089	3.54937	3.79351	4.22076	5.80767	17.8926	19.7237	31.1678	49.6004	87.0149	76.2117	95.6514	119.272
388.5	-0.53998	-0.78412	3.97662	3.61041	4.52594	6.47906	13.5591	20.7003	31.595	44.0462	72.3055	79.3855	96.7195	117.99
389	-0.47895	-1.42499	3.57989	3.64093	4.19024	5.96026	13.4065	20.7003	32.358	44.0462	68.0025	77.646	99.283	115.427
389.5	-0.23481	0.43658	4.77008	4.06817	4.22076	6.69268	12.9793	16.6414	28.7874	48.4712	69.4978	84.0547	88.8765	114.206
390	-0.35688	-0.84516	3.82403	3.33575	4.4649	5.89923	13.1319	17.0687	23.5689	47.8609	63.1807	89.6089	92.7828	109.079
390.5	-0.14325	0.49762	4.19024	3.85455	4.31231	7.63873	15.3597	18.0757	21.3716	50.7296	61.5633	87.8084	102.274	115.549
391	-0.02118	0.6502	4.40386	3.45782	3.82403	6.87579	17.8316	21.3106	22.8975	52.9879	59.7933	103.617	100.26	112.589
391.5	-0.81464	-0.29584	5.13629	3.39679	3.82403	8.00494	15.085	23.5689	22.3177	54.3001	58.5115	95.1021	96.3228	110.483
392	0.19244	0.95538	5.07525	3.91558	4.80059	7.60821	17.8621	19.2659	23.6299	48.5018	61.7159	94.5833	102.64	119.669
[truncated: 483 more rows]

## Sheet: adr-2(gv42);slo-2(gf) trace
step volt	-60	-50	-40	-30	-20	-10	0	10	20	30	40	50	60	70
time(ms)
[truncated: 1,261 more rows]
