# Supplementary material for: Slo2 potassium channel function depends on RNA editing-regulated expression of a SCYL1 protein
Source: eLife. 2020 Apr 21;9:e53986. doi: 10.7554/eLife.53986 (PMC7195191; doi:10.7554/eLife.53986)
Supplement: Figure 5—source data 1. [file elife-53986-fig5-data1.xlsx]

## Sheet: Sheet1
		adr-1(zw96)	wild type		relative to wild type	average	SE
rncs-1	RNA_Seq1	1.65245	13.7422		0.120246	0.140613	0.0415217
	RNA_Seq2	1.19293	5.40969		0.220518
	RNA_Seq3	1.12485	13.874		0.0810759
scyl-1	RNA_Seq1	97.8598	145.249		0.673739	0.639171	0.0227369
	RNA_Seq2	105.813	163.425		0.647473
	RNA_Seq3	94.7807	158.948		0.5963
wago-2	RNA_Seq1	128.317	150.349		0.853457	0.788212	0.0337767
	RNA_Seq2	106.827	138.601		0.770751
	RNA_Seq3	121.337	163.874		0.740427
vit-3	RNA_Seq1	1342.98	1884.97		0.712468	0.795867	0.141242
	RNA_Seq2	1182.5	1103.79		1.0713
	RNA_Seq3	2758.96	4569.08		0.603833
aps-3	RNA_Seq1	37.3647	48.2779		0.77395	0.807337	0.1293
	RNA_Seq2	30.897	29.5351		1.04611
	RNA_Seq3	34.2834	56.9538		0.601951
vit-4	RNA_Seq1	1116.13	1418.56		0.7868	0.819741	0.130637
	RNA_Seq2	1021.63	963.186		1.06068
	RNA_Seq3	2495.45	4079.21		0.611748
Y92H12BL.1	RNA_Seq1	51.4418	60.1991		0.854528	0.852538	0.0164463
	RNA_Seq2	53.3241	60.5972		0.879977
	RNA_Seq3	50.5203	61.3774		0.823109
Y54E10BR.2	RNA_Seq1	22.2932	29.0023		0.76867	0.888363	0.174124
	RNA_Seq2	31.3742	25.4779		1.23143
	RNA_Seq3	35.0659	52.7313		0.664992
Y75B8A.8	RNA_Seq1	65.205	78.2884		0.832881	0.905469	0.0365691
	RNA_Seq2	72.5304	77.6552		0.934005
	RNA_Seq3	73.4575	77.3627		0.94952
cpl-1	RNA_Seq1	835.681	920.186		0.908165	0.907142	0.0514496
	RNA_Seq2	823.721	827.246		0.995739
	RNA_Seq3	764.701	935.39		0.817521
F48E8.4	RNA_Seq1	91.1614	97.0302		0.939515	0.92158	0.0152531
	RNA_Seq2	93.2278	99.8174		0.933983
	RNA_Seq3	91.7974	102.999		0.891241
Y80D4G.1	RNA_Seq1	6.3321	7.17644		0.882346	0.924703	0.0216097
	RNA_Seq2	6.91901	7.37288		0.938441
	RNA_Seq3	7.14034	7.48996		0.953322
sydn-1	RNA_Seq1	7.27407	6.52404		1.11496	0.931904	0.150139
	RNA_Seq2	14.7924	14.135		1.04651
	RNA_Seq3	10.0747	15.8847		0.634239
F57F5.5	RNA_Seq1	82.8407	80.5422		1.02854	0.935861	0.0648083
	RNA_Seq2	67.7586	83.5448		0.811046
	RNA_Seq3	77.1254	79.6751		0.968
M106.2	RNA_Seq1	42.7548	41.1014		1.04023	0.951308	0.082012
	RNA_Seq2	38.0546	37.0825		1.02621
	RNA_Seq3	49.64	63.0363		0.787483
Y50D4B.4	RNA_Seq1	28.259	27.994		1.00946	0.9595	0.0631251
	RNA_Seq2	17.8344	17.2325		1.03493
	RNA_Seq3	31.4468	37.7011		0.834109
act-2	RNA_Seq1	1008.17	1094.44		0.921173	0.960211	0.0213542
	RNA_Seq2	956.852	961.921		0.99473
	RNA_Seq3	1044.01	1082.17		0.964731
cdc-26	RNA_Seq1	46.732	45.3717		1.02998	0.961976	0.0630722
	RNA_Seq2	39.2475	38.4786		1.01998
	RNA_Seq3	48.6619	58.2105		0.835964
M01F1.9	RNA_Seq1	40.3475	43.5924		0.925563	0.969612	0.0598538
	RNA_Seq2	33.939	31.193		1.08803
	RNA_Seq3	53.5525	59.8191		0.895241
gpd-4	RNA_Seq1	98.9064	100.114		0.987935	0.976811	0.102681
	RNA_Seq2	79.3897	69.1044		1.14884
	RNA_Seq3	107.839	135.875		0.793662
lin-7	RNA_Seq1	27.003	28.0534		0.962559	0.980616	0.0638839
	RNA_Seq2	24.2165	22.0314		1.09918
	RNA_Seq3	27.8278	31.6187		0.880105
Y67D2.7	RNA_Seq1	41.8128	42.6435		0.980521	0.980901	0.0619806
	RNA_Seq2	41.4544	38.0859		1.08844
	RNA_Seq3	49.9824	57.2052		0.873739
F54D11.2	RNA_Seq1	96.2375	91.3958		1.05298	0.989627	0.0521453
	RNA_Seq2	107.364	104.267		1.0297
	RNA_Seq3	128.966	145.526		0.886205
Y37E3.10	RNA_Seq1	299.074	296.606		1.00832	0.994883	0.0247913
	RNA_Seq2	292.925	284.532		1.0295
	RNA_Seq3	278.767	294.421		0.946831
glb-13	RNA_Seq1	4.39584	4.44821		0.988228	1.00167	0.0405682
	RNA_Seq2	4.05597	4.31902		0.939095
	RNA_Seq3	3.52126	3.26743		1.07769
C35E7.6	RNA_Seq1	9.57665	9.96398		0.961127	1.00435	0.0629145
	RNA_Seq2	9.06629	9.81596		0.923628
	RNA_Seq3	8.16737	7.23862		1.12831
zip-5	RNA_Seq1	3.34921	4.44821		0.752935	1.01697	0.178867
	RNA_Seq2	3.28057	3.49012		0.939958
	RNA_Seq3	3.27673	2.41287		1.35802
uba-2	RNA_Seq1	106.599	110.909		0.961144	1.0299	0.1
	RNA_Seq2	98.596	80.36		1.22693
	RNA_Seq3	118.158	131.049		0.901631
gmn-1	RNA_Seq1	31.7129	37.958		0.835472	1.03071	0.125646
	RNA_Seq2	28.1532	22.2495		1.26534
	RNA_Seq3	39.5164	39.8627		0.991314
Y71F9B.6	RNA_Seq1	33.3351	30.8409		1.08087	1.03125	0.116189
	RNA_Seq2	27.9743	23.2529		1.20304
	RNA_Seq3	28.6592	35.3888		0.809837
Y111B2A.19	RNA_Seq1	12.2456	11.0316		1.11005	1.04143	0.0527502
	RNA_Seq2	20.1009	18.6721		1.07652
	RNA_Seq3	22.1546	23.626		0.93772
lem-2	RNA_Seq1	96.3945	97.3861		0.989818	1.08278	0.121726
	RNA_Seq2	128.3	96.8945		1.32412
	RNA_Seq3	125.787	134.618		0.934401
Y49E10.21	RNA_Seq1	45.476	44.2448		1.02783	1.0874	0.11887
	RNA_Seq2	46.4648	35.2938		1.31651
	RNA_Seq3	50.5693	55.0939		0.917874
Y71H2AM.8	RNA_Seq1	50.6568	49.7606		1.01801	1.09005	0.0738376
	RNA_Seq2	54.1592	43.7574		1.23772
	RNA_Seq3	33.452	32.9759		1.01444
Y104H12D.3	RNA_Seq1	68.9205	64.1135		1.07498	1.09293	0.024638
	RNA_Seq2	74.5583	70.195		1.06216
	RNA_Seq3	77.7612	68.1134		1.14164
taf-7.2	RNA_Seq1	31.3989	32.1457		0.976767	1.09339	0.219105
	RNA_Seq2	31.3145	20.6353		1.51752
	RNA_Seq3	37.609	47.8553		0.785891
rpl-13	RNA_Seq1	2270.98	2133.42		1.06448	1.09353	0.0176759
	RNA_Seq2	2033.59	1864.64		1.09061
	RNA_Seq3	1945.45	1728.52		1.1255
ttn-1	RNA_Seq1	606.103	513.56		1.1802	1.17067	0.158108
	RNA_Seq2	369.452	414.103		0.892173
	RNA_Seq3	551.078	382.792		1.43963
Y39A1A.21	RNA_Seq1	45.6854	38.0173		1.2017	1.17201	0.0149215
	RNA_Seq2	36.2652	31.4111		1.15453
	RNA_Seq3	41.277	35.5899		1.1598
clec-41	RNA_Seq1	166.623	147.977		1.12601	1.19009	0.105315
	RNA_Seq2	113.746	108.499		1.04836
	RNA_Seq3	119.919	85.9083		1.39589
M02D8.1	RNA_Seq1	197.813	185.045		1.069	1.19594	0.102565
	RNA_Seq2	216.04	192.916		1.11986
	RNA_Seq3	161.391	115.365		1.39896
lam-2	RNA_Seq1	270.24	240.5		1.12366	1.21541	0.171484
	RNA_Seq2	300.798	308.483		0.975088
	RNA_Seq3	224.187	144.873		1.54747
