# Supplementary material for: Slo2 potassium channel function depends on RNA editing-regulated expression of a SCYL1 protein
Source: eLife. 2020 Apr 21;9:e53986. doi: 10.7554/eLife.53986 (PMC7195191; doi:10.7554/eLife.53986)
Supplement: Figure 7—source data 1. [file elife-53986-fig7-data1.xlsx]

## Sheet: Panel_A_trace
wild type																slo-2(lf)																scyl-1(zw99)																slo-2(lf);scyl-1(zw99)
step volt	-60	-50	-40	-30	-20	-10	0	10	20	30	40	50	60	70		step volt	-60	-50	-40	-30	-20	-10	0	10	20	30	40	50	60	70		step volt	-60	-50	-40	-30	-20	-10	0	10	20	30	40	50	60	70		step volt	-60
time(ms)																time(ms)																time(ms)																time(ms)
0.05	2.60235	3.12115	2.66339	2.32769	1.80889	0.37457	-0.51044	-3.16547	-4.47773	-4.38617	-2.64667	-1.79218	-1.57856	-1.63959		0.05	0.93629	1.1194	0.84474	0.75319	0.50905	1.57716	1.33302	1.33302	0.99733	-0.04027	0.57008	-0.74217	-0.65062	-0.40648		0.05	-0.55898	0.73497	1.87022	1.68711	2.05332	0.28331	-0.43691	0.16123	-0.92519	0.02696	-0.43691	0.57627	0.41758	0.00254		0.05	-1.26782
0.1	2.38862	2.96846	3.18208	2.81587	1.35102	0.31343	-0.90728	-2.82988	-4.38628	-4.44731	-2.8604	-0.81572	-1.304	-1.05986		0.1	0.93629	1.21095	0.81422	0.50905	0.53957	1.18044	1.45509	1.30251	0.96681	-0.31493	0.72267	-0.25389	-0.58958	-0.31493		0.1	-0.48584	1.24756	1.61377	2.06543	2.3462	0.60059	-0.57128	0.74708	-0.98632	0.34424	-0.87646	0.83252	0.64942	0.35645		0.1	-1.78657
0.15	2.66318	3.27353	3.09042	2.72421	1.38144	-0.23599	-0.75479	-2.95206	-4.02017	-4.96622	-2.92154	-0.38858	-1.21256	-1.27359		0.15	0.96681	1.18044	0.63112	0.35646	0.63112	0.69215	1.42458	1.57716	1.1194	-0.49803	0.47853	0.02077	-0.46751	-0.55907		0.15	-0.254	2.18741	1.57705	1.96768	2.12637	0.88125	-0.47373	0.66153	-0.9498	0.17325	-0.7789	0.14883	0.73477	0.4296		0.15	-1.81703
0.2	2.20531	2.66307	3.54808	3.15135	0.95409	-0.7549	-1.39577	-3.16579	-4.26442	-5.51564	-2.55543	-0.35817	-0.69386	-0.90748		0.2	0.66164	0.99733	0.4175	0.50905	0.38698	0.69215	1.6382	1.6382	0.93629	-0.55907	0.38698	0.17336	-0.437	-0.65062		0.2	-0.18085	1.84551	1.51592	2.24834	2.07745	0.72247	-0.14423	0.84454	-1.35273	0.41729	-0.81562	0.90557	0.46612	0.91778		0.2	-2.15267
0.25	2.44934	2.44934	3.21228	2.05261	1.59485	-1.33484	-1.12121	-4.32556	-4.47815	-5.75989	-2.52502	-1.0907	-0.755	-0.96863		0.25	0.50905	1.24147	0.26491	0.32594	0.50905	0.81422	1.60768	1.69923	0.63112	-0.37596	0.26491	0.23439	-0.74217	-0.74217		0.25	0.50264	1.95528	1.79659	2.3337	2.01631	0.6003	-0.19316	0.05098	-1.07207	-0.36406	-0.01005	1.13741	-0.16875	0.58809		0.25	-2.03055
0.3	2.7239	1.56423	3.27321	1.80837	1.6863	-0.32786	-1.45701	-3.92894	-4.20359	-5.75999	-2.76927	-2.1284	-1.39598	-0.93821		0.3	0.44801	1.18044	0.35646	0.32594	0.38698	1.1194	1.8213	1.51613	0.53957	-0.46751	0.44801	0.02077	-0.68114	-0.83372		0.3	0.28282	1.85752	2.61436	2.05284	1.94297	0.18516	-0.05898	0.56358	-1.35293	-0.38857	-0.05898	1.52793	-0.30312	0.2584		0.3	-2.06101
0.35	2.96793	2.35758	2.47965	1.19791	1.65568	-0.08383	-1.27401	-3.28817	-3.95956	-5.88217	-3.22714	-3.13558	-1.85385	-1.09091		0.35	0.50905	1.36354	0.38698	0.05128	0.6006	1.36354	1.72975	1.33302	0.38698	-0.40648	0.57008	-0.25389	-0.74217	-0.65062		0.35	0.83204	2.11377	2.1626	2.37012	2.40674	0.31934	-0.71826	0.56348	-0.85253	-0.77929	0.36817	0.92969	-0.38867	0.12403		0.35	-1.7863
0.4	2.78472	2.69317	1.93023	2.11333	1.38091	1.13677	-1.51826	-2.03706	-3.37983	-6.15693	-3.68501	-2.83051	-1.97602	-1.51826		0.4	0.75319	1.27199	0.69215	-0.07079	0.57008	1.18044	1.60768	1.36354	0.84474	-0.437	0.50905	-0.71165	-0.49803	-0.89476		0.4	0.62442	2.30899	1.95499	2.3334	1.60098	-0.26669	-0.49863	0.89297	-1.19443	-0.2789	-0.01035	0.7709	0.20938	0.35586		0.4	-1.69469
0.45	2.02168	3.39497	1.93012	1.83857	0.61787	0.58735	-1.33526	-2.2813	-3.16631	-5.79082	-4.14287	-2.46441	-2.03716	-1.45733		0.45	0.72267	1.27199	0.6006	-0.19286	0.69215	1.1194	1.36354	1.36354	0.93629	-0.40648	0.66164	-0.89476	-0.68114	-0.86424		0.45	0.59991	1.67413	1.23467	2.60186	1.69854	-0.09589	-0.4621	0.55108	-0.53535	-0.93818	0.38018	0.17266	0.7586	0.57549		0.45	-1.51153
0.5	1.8995	3.24227	2.29623	2.17416	0.92294	0.22103	-0.78605	-2.34244	-3.04435	-5.913	-3.6547	-2.76969	-1.76261	-1.3964		0.5	0.81422	1.27199	0.6006	-0.31493	0.78371	0.99733	1.21095	1.42458	1.1194	-0.19286	0.66164	-0.83372	-0.89476	-1.16942		0.5	0.30684	1.52754	1.40547	2.27217	1.42989	0.24581	0.38008	0.14815	-0.53544	-0.43779	0.09932	0.17256	1.21016	0.53877		0.5	-1.41993
0.55	1.59422	3.85252	2.35716	1.68577	0.80076	-0.1758	-0.45046	-2.67824	-3.10549	-5.76052	-3.38015	-2.70876	-1.36599	-0.90822		0.55	0.63112	1.08888	0.6006	-0.16234	0.69215	1.24147	1.30251	1.1194	1.05836	0.02077	0.99733	-0.77269	-0.89476	-1.35252		0.55	-0.07167	1.06358	1.46641	2.39415	1.77159	0.94151	0.83165	0.17247	0.07481	-0.53554	0.45323	-0.08388	1.03917	0.86827		0.55	-1.2978
0.6	2.41809	3.60827	2.7843	1.92981	1.47204	-0.20642	0.12927	-2.43421	-2.83093	-4.99768	-2.953	-3.10559	-1.51868	-0.57263		0.6	0.75319	1.02785	0.63112	-0.1013	0.87526	1.30251	1.08888	0.90578	0.87526	0.4175	1.05836	-0.74217	-0.89476	-1.53563		0.6	-0.01074	1.47852	1.45411	2.56495	1.85694	0.89258	1.57618	0.42872	0.00147	-0.16943	-0.07177	0.16016	0.917	0.69727		0.6	-1.17568
0.65	1.96022	3.60817	2.4485	1.34987	2.02126	0.64797	-0.5117	-2.64793	-3.1057	-4.99779	-2.64793	-3.22777	-0.90843	-0.69481		0.65	0.78371	0.63112	0.84474	0.0818	0.81422	1.42458	1.1194	0.69215	0.75319	0.32594	1.21095	-0.92528	-0.71165	-1.77977		0.65	-0.49912	1.14883	1.16104	2.49161	2.24747	0.37979	1.74698	0.9169	-0.07187	-0.77988	0.03799	-0.15732	0.88028	0.99014		0.65	-1.08407
0.7	2.14322	2.50943	2.35684	1.44132	2.53995	0.49527	-0.45077	-2.89218	-3.19736	-4.90634	-2.83114	-2.67856	-0.93905	-1.12216		0.7	0.78371	0.57008	0.78371	-0.00975	1.02785	1.36354	0.96681	0.44801	0.50905	0.4175	1.14992	-0.68114	-1.04735	-1.96288		0.7	-0.32831	1.31963	0.47735	2.61358	1.9544	0.08672	1.6004	0.37969	-0.40156	-0.36494	-0.20625	0.00127	0.50176	0.7459		0.7	-0.83988
0.75	1.04448	2.50933	1.7769	1.65483	2.17363	1.5938	-1.15278	-3.4416	-4.08247	-4.29609	-2.9228	-2.80073	-0.63398	-0.78657		0.75	0.93629	0.6006	0.66164	0.05128	1.18044	0.90578	0.84474	0.29543	0.66164	0.35646	0.75319	-0.58958	-1.10838	-2.39012		0.75	-0.62138	1.30733	0.74581	2.13741	1.72237	-0.24296	0.96553	0.26973	-0.10869	-0.26738	-0.1331	-0.07207	0.63594	0.79463		0.75	-0.90086
0.8	0.89179	1.80732	2.32612	2.38715	2.26508	1.44111	-0.90875	-3.10601	-4.23516	-3.92999	-2.37359	-3.04498	-0.51202	-0.42047		0.8	0.90578	0.87526	0.35646	0.20387	1.33302	0.66164	0.84474	0.02077	0.53957	0.32594	0.32594	-0.68114	-1.07787	-2.23753		0.8	0.09874	2.1129	0.67247	1.942	2.07627	0.30626	0.19639	-0.09658	-0.42617	-0.15761	-0.71914	0.41612	0.47715	0.19639		0.8	-0.83977
0.85	0.4034	1.9598	2.29549	2.32601	1.92928	1.77669	-0.75626	-3.86906	-4.2963	-3.83854	-2.22111	-2.86198	-0.96989	-0.32902		0.85	1.18044	1.27199	0.29543	0.0818	1.45509	0.50905	0.84474	0.11232	0.53957	0.32594	-0.13182	-0.71165	-0.9558	-2.20702		0.85	0.13526	2.24708	1.12403	1.80762	2.23487	0.70899	-0.16992	0.22071	-0.30419	-0.78027	-0.85351	0.11085	0.29395	0.69678		0.85	-0.83972
0.9	1.16624	1.59348	2.87522	2.57005	2.50901	0.76951	-0.48171	-3.77761	-3.47243	-2.8926	-3.5945	-3.07571	-1.64138	-0.17654		0.9	1.21095	1.08888	0.4175	0.05128	1.18044	0.72267	1.1194	0.20387	0.35646	0.14284	0.02077	-0.80321	-0.71165	-2.23753		0.9	0.69669	2.18594	0.86758	2.6254	2.53995	1.20938	-0.01132	0.24502	-0.47519	-0.4996	-1.23202	0.48917	0.0253	0.42813		0.9	-0.59553
0.95	1.44079	1.56286	2.11218	2.3258	2.14269	0.40319	0.61682	-3.9303	-3.10633	-2.43494	-4.266	-3.47254	-1.64148	-0.69544		0.95	1.21095	1.18044	0.38698	-0.28441	1.05836	0.96681	1.24147	0.29543	0.4175	0.23439	0.20387	-0.68114	-0.80321	-2.1765		0.95	0.61114	1.46563	1.02618	2.57647	2.40557	1.20928	0.0252	0.46465	-0.06025	-0.35322	-0.97578	0.68438	0.58672	0.42803		0.95	-0.71754
1	1.65431	1.71534	1.83741	2.23414	2.05104	0.2505	0.46412	-3.0454	-2.89281	-2.09935	-4.29662	-2.98436	-1.39745	-0.9702		1	1.18044	0.87526	0.50905	-0.31493	0.72267	0.78371	1.30251	0.47853	0.75319	0.14284	0.53957	-0.71165	-0.71165	-2.29857		1	0.8796	1.05049	0.76973	2.74727	2.73506	1.16036	-0.30449	0.24483	-0.37773	0.12276	-0.57304	1.0627	0.7209	-0.13359		1	-0.74801
1.05	1.95938	2.32559	1.22696	1.77627	1.80679	0.15884	0.79971	-2.92343	-3.74741	-2.28256	-4.0831	-2.40463	-1.45859	-1.15341		1.05	1.02785	0.84474	0.20387	-0.22337	0.6006	0.69215	1.33302	0.63112	0.75319	0.05128	0.87526	-0.65062	-0.74217	-2.02391		1.05	0.64756	1.08702	1.7462	2.67393	2.55186	0.51329	-0.43886	0.07383	-0.12148	-0.29238	-0.12148	0.72081	1.25792	-0.13369		1.05	-0.6564
1.1	1.68462	2.66118	2.14238	1.89824	2.14238	1.04375	-0.54317	-2.40474	-3.83907	-2.61836	-3.99165	-2.3437	-1.24507	-1.33662		1.1	1.1194	0.81422	0.26491	-0.22337	0.38698	0.4175	1.08888	0.96681	1.05836	-0.37596	0.66164	-0.40648	-0.6201	-1.8408		1.1	0.83057	1.66065	2.38087	2.82032	2.89356	0.63526	-0.28027	-0.21923	-0.54882	-0.09716	-0.01171	0.95264	1.34327	-0.54882		1.1	-0.44272
1.15	1.50141	2.29486	2.32538	1.40985	2.0202	0.86054	-0.60431	-2.58795	-4.57159	-1.76397	-3.96124	-2.34381	-1.85553	-1.76397		1.15	0.75319	0.72267	0.29543	0.02077	0.17336	0.44801	0.99733	0.90578	1.05836	-0.83372	0.57008	-0.437	-0.55907	-1.53563		1.15	0.3544	2.01456	3.06436	2.12442	2.49063	0.59854	-0.14609	-0.21933	-0.56113	-0.28036	-0.07284	0.92813	1.40421	-0.24374		1.15	-0.38163
1.2	1.04354	2.75252	2.75252	1.65389	2.26424	1.19612	-0.42131	-3.50358	-3.83928	-2.06926	-4.11393	-2.13029	-2.19133	-1.21476		1.2	0.69215	0.75319	0.38698	0.02077	0.38698	0.53957	0.75319	0.66164	1.21095	-0.58958	0.44801	-0.49803	-0.77269	-1.1389		1.2	0.30547	2.02667	2.85674	2.69805	2.6126	1.02569	0.28106	0.30548	-1.14716	-0.06074	-0.01191	0.78155	0.26885	-0.82978		1.2	-0.56469
1.25	1.47068	2.32517	2.35569	1.1655	2.11155	0.73826	-0.20779	-3.5342	-4.20559	-1.45901	-3.80886	-1.58108	-2.03884	-0.78762		1.25	0.78371	0.57008	0.78371	-0.04027	0.63112	0.66164	0.57008	0.50905	1.27199	-0.25389	0.50905	-1.04735	-0.89476	-1.10838		1.25	0.08565	1.97774	2.7712	2.91768	2.09981	1.09883	0.54952	0.83028	-0.90312	-0.51249	-0.5247	0.73262	0.01241	-1.0496		1.25	-0.56463
1.3	1.22643	3.17956	2.3861	1.44005	1.89782	1.56212	-0.17738	-3.87	-4.02259	-1.88636	-3.22913	-1.27601	-1.73377	-1.18446		1.3	0.87526	0.47853	0.81422	-0.1013	0.87526	0.84474	0.35646	0.38698	1.02785	0.20387	0.38698	-1.23045	-0.98631	-1.19994		1.3	0.45176	1.86778	2.11192	3.14952	2.30723	1.19639	0.78135	1.0377	-1.00087	-0.08535	-0.7079	0.57383	-0.15859	-1.36708		1.3	-0.90027
1.35	1.89771	2.99635	2.69117	0.8296	1.31788	1.59254	-0.9099	-3.13769	-4.35839	-1.45922	-3.35131	-1.52025	-1.64233	-1.09301		1.35	0.96681	0.32594	0.84474	-0.19286	1.1194	0.6006	0.05128	0.75319	1.02785	0.26491	-0.00975	-1.07787	-1.04735	-1.62718		1.35	0.07325	2.12403	1.78223	2.06299	2.30714	1.17188	0.47608	0.57374	-0.15868	0.65919	-1.17187	0.53712	0.07325	-1.03759		1.35	-0.99177
1.4	2.01968	3.24038	2.50796	1.43984	1.16519	2.32485	-0.97104	-3.07676	-4.20591	-2.2833	-2.61899	-2.2833	-1.79502	-1.30674		1.4	0.69215	0.02077	0.44801	-0.1013	1.08888	0.75319	0.4175	0.99733	0.87526	0.0818	-0.07079	-1.07787	-1.04735	-2.08495		1.4	0.18301	2.44131	1.35489	2.0751	2.67325	1.44034	0.45157	0.06094	-0.28085	1.51358	-0.68368	0.35391	-0.1832	-1.28183		1.4	-1.17482
1.45	2.11113	2.44682	2.72148	1.53129	1.1956	1.7144	-1.94771	-2.52755	-4.17549	-1.94771	-2.89376	-2.31392	-2.22237	-1.00167		1.45	0.66164	-0.1013	0.20387	-0.40648	1.1194	0.72267	0.72267	1.36354	0.90578	0.0818	-0.13182	-0.77269	-1.47459	-2.1765		1.45	-0.1955	2.46563	1.74542	1.98956	2.56329	1.56231	0.41485	-0.1955	-0.14667	0.91534	-0.84247	0.8543	0.1585	-0.56171		1.45	-1.11374
1.5	1.74481	2.4162	2.56878	2.4162	1.77533	1.8974	-1.15436	-2.34454	-4.26715	-1.9173	-2.55817	-2.00885	-2.98541	-0.42194		1.5	0.47853	-0.31493	0.47853	-0.46751	0.99733	0.6006	0.87526	1.57716	0.96681	-0.19286	0.0818	-0.92528	-1.62718	-2.32909		1.5	-0.42753	2.25801	1.30587	2.72188	2.61202	1.23262	1.11055	0.43917	-0.43974	0.09737	-0.5496	1.0129	0.37813	-0.04911		1.5	-1.05265
1.55	1.65315	2.66023	3.05696	2.04988	1.89729	1.7447	-1.76482	-2.58879	-3.4738	-1.33757	-3.01604	-2.37517	-2.58879	-0.36101		1.55	0.0818	-0.1013	0.72267	-0.37596	1.08888	0.6006	0.87526	1.21095	0.81422	-0.13182	0.20387	-1.01683	-1.74925	-2.1765		1.55	-0.75722	1.84288	1.03721	2.4044	2.77061	1.25694	0.86632	0.29258	-0.47646	-0.23232	-0.47646	1.51329	0.5001	0.60997		1.55	-1.02208
1.6	2.14133	2.81272	2.81272	2.2634	2.50754	2.38547	-1.30716	-2.98562	-3.62649	-1.88699	-2.772	-1.97854	-2.19217	-0.81888		1.6	-0.25389	0.35646	1.08888	-0.25389	1.42458	0.44801	0.6006	0.81422	0.75319	-0.13182	0.26491	-1.04735	-1.62718	-2.02391		1.6	-0.48876	2.08692	0.59766	2.13575	2.53858	0.89063	1.0127	0.41456	-0.57421	-0.65966	0.15821	1.13477	0.40235	0.10938		1.6	-0.74736
1.65	2.20226	2.84313	2.38536	2.01915	1.95812	1.95812	-1.30726	-3.87074	-3.50453	-2.49745	-3.13832	-1.45985	-1.73451	-0.97157		1.65	-0.6201	0.72267	1.18044	0.23439	1.45509	0.47853	0.75319	0.23439	0.57008	0.05128	0.35646	-1.29149	-1.41356	-1.8408		1.65	-0.733	2.07462	0.91495	1.68399	2.58731	1.07364	0.69522	-0.22031	-0.5621	-0.42782	0.20694	1.03702	0.1337	0.34122		1.65	-0.59472
1.7	2.59888	2.53785	1.37818	1.95801	2.08008	1.53077	-0.30029	-3.32153	-4.11498	-2.49755	-3.01635	-1.00219	-1.45995	-0.81909		1.7	-0.6201	1.1194	1.24147	0.17336	1.51613	0.29543	0.69215	0.17336	0.50905	0.29543	0.05128	-1.32201	-1.59666	-1.47459		1.7	-0.26923	2.58721	1.09796	1.75714	2.50176	0.71954	0.98809	-0.17157	-0.9162	-0.42792	0.01153	0.51202	0.32891	-0.44013		1.7	-0.1369
1.75	1.92739	3.23965	1.37807	2.14101	1.50014	0.85927	-0.81919	-2.80283	-4.32871	-2.37559	-2.98594	-0.54453	-1.33799	-0.6666		1.75	-0.437	1.18044	1.33302	0.14284	1.05836	0.11232	0.63112	0.4175	0.53957	0.20387	-0.40648	-1.29149	-1.35252	-1.56615		1.75	0.04805	2.12325	1.61055	1.98897	2.61153	0.69503	0.26778	-0.80644	-1.0872	0.06026	-0.3914	0.15792	-0.01298	-0.58671		1.75	0.01574
1.8	1.98832	2.41557	1.71366	2.20194	2.50712	1.07279	-0.84981	-1.82638	-4.32882	-1.3381	-2.5588	-0.57516	-1.0024	-0.54464		1.8	-0.52855	1.08888	1.08888	0.14284	0.66164	0.20387	0.63112	0.50905	0.17336	0.20387	-0.46751	-1.04735	-0.98631	-1.35252		1.8	0.56065	2.3795	1.96446	2.52598	2.01329	0.36534	0.13341	-0.3915	-0.64784	-0.35488	-0.3915	-0.26943	0.02354	-1.07509		1.8	0.07683
1.85	1.86614	2.44598	2.20184	3.05633	2.01873	1.68304	-1.18561	-2.46735	-4.45099	-2.00959	-2.58942	-0.39216	-0.48371	-1.1551		1.85	-0.52855	1.14992	0.75319	0.05128	0.66164	0.32594	0.66164	0.81422	0.05128	0.23439	-0.6201	-0.49803	-0.71165	-1.04735		1.85	0.26759	2.29395	2.18409	2.63575	2.26954	0.53614	0.25538	-0.25732	-0.25732	-0.30614	0.06007	0.06007	-0.20849	0.04786		1.85	0.07688
1.9	1.98811	2.3238	2.04914	2.53743	1.74397	2.75105	-0.81951	-2.16228	-3.68816	-1.8571	-2.46746	-0.91106	-0.42278	-1.91814		1.9	-0.55907	0.90578	0.44801	0.20387	0.72267	0.66164	0.96681	1.08888	0.11232	0.17336	-0.55907	-0.19286	-0.49803	-1.10838		1.9	0.27969	3.0629	2.51358	2.3793	1.74454	0.6337	0.78018	0.62149	-0.02548	-0.46493	0.04776	0.49942	0.60929	0.51163		1.9	-0.07566
1.95	1.43869	2.59836	1.92697	2.59836	0.79782	2.59836	-0.75858	-2.40653	-3.62723	-2.5286	-3.10843	-1.24686	-1.09427	-2.40653		1.95	-0.6201	0.99733	0.02077	0.20387	0.99733	1.1194	1.05836	1.27199	0.23439	0.20387	-0.46751	-0.19286	-0.83372	-1.1389		1.95	0.41387	2.81866	2.65997	2.58673	1.78106	0.8045	0.79229	0.96319	-0.69697	-0.33076	0.62139	0.54815	0.78008	0.60919		1.95	-0.16715
2	1.07237	2.29308	1.71324	2.01842	0.79771	2.38463	-0.72816	-2.04042	-2.89491	-2.43715	-2.92543	-1.8268	-1.15541	-2.46767		2	-0.58958	0.99733	0.02077	0.23439	0.81422	1.33302	0.96681	1.36354	0.4175	0.17336	-0.40648	-0.28441	-1.35252	-1.32201		2	0.2795	3.0505	3.09932	2.31807	1.40255	0.07198	0.75557	1.08516	-1.16093	-0.55058	0.34053	0.51143	0.51143	-0.13554		2	-0.62486
2.05	1.6521	2.14038	1.56055	2.72022	0.73657	1.83521	-1.06396	-2.13208	-3.13916	-2.77295	-3.44433	-1.91846	-1.46069	-2.55932		2.05	-0.74217	0.99733	0.02077	0.35646	0.50905	1.18044	1.1194	1.14992	0.17336	0.29543	-0.1013	-0.46751	-1.87132	-1.29149		2.05	-0.05019	2.13487	2.69639	2.20811	1.64659	-0.29433	0.57237	0.92637	-1.49062	-0.52626	0.47471	0.2794	0.02305	-0.13564		2.05	-0.59429
2.1	2.04872	2.93373	1.74355	2.3539	1.16371	1.59096	-1.00303	-1.67442	-2.80357	-3.10875	-2.80357	-2.13218	-1.52183	-2.07115		2.1	-0.49803	1.14992	0.11232	0.20387	0.53957	0.90578	1.14992	1.05836	0.29543	0.44801	-0.13182	-0.49803	-2.26805	-0.92528		2.1	-0.4165	1.46339	2.43995	1.79298	1.73194	-0.37987	0.82862	0.31593	-1.01464	-0.11132	0.15723	0.41358	-0.2456	-0.46532		2.1	-0.68579
2.15	2.50638	2.44535	1.62137	2.26224	1.43827	1.59086	-1.4609	-2.22384	-3.29196	-2.52902	-2.65109	-1.73556	-1.58297	-1.03366		2.15	-0.28441	1.02785	0.47853	0.0818	0.57008	0.81422	1.27199	1.08888	0.4175	0.17336	-0.25389	-0.52855	-2.29857	-0.77269		2.15	-0.72177	0.90177	1.68302	2.02481	2.09805	0.31583	0.91397	-0.12363	-1.13681	0.05948	0.37686	0.15714	0.05948	-0.17245		2.15	-0.68574
2.2	1.6823	2.56731	2.26214	2.10955	1.56023	1.56023	-1.18635	-2.55964	-3.96345	-3.13947	-2.07136	-2.07136	-2.07136	-0.91169		2.2	-0.19286	0.99733	0.57008	-0.07079	0.6006	1.1194	1.54665	0.84474	0.17336	-0.1013	-0.37596	-0.55907	-2.08495	-0.58958		2.2	-1.07587	0.4378	1.68292	1.56085	2.08575	0.59649	0.42559	-0.86835	-0.7829	0.54766	0.41339	0.01055	-0.14814	-0.14814		2.2	-0.34999
2.25	1.56013	1.83479	2.3841	2.23151	1.83479	2.10944	-1.27801	-3.20061	-4.94012	-2.80389	-1.82732	-1.97991	-1.55267	-0.88128		2.25	0.20387	0.90578	0.96681	-0.37596	0.47853	1.08888	1.42458	0.69215	0.26491	-0.34544	-0.437	-0.37596	-1.90184	-0.58958		2.25	-1.06376	0.69405	1.85372	1.73165	2.36641	0.80391	0.40108	-0.783	-0.55107	0.16915	0.09591	-0.09941	0.21798	0.21798		2.25	-0.19735
2.3	1.77365	2.0483	2.71969	2.5671	1.3464	1.62106	-0.78983	-3.20072	-4.7266	-3.96366	-2.34623	-2.4683	-1.24759	-0.97294		2.3	0.26491	0.50905	1.1194	-0.25389	0.32594	1.27199	1.24147	0.47853	0.47853	-0.49803	-0.19286	-0.6201	-1.74925	-0.86424		2.3	-0.83193	0.92589	2.24425	1.20665	2.41514	1.13341	0.33995	-1.16152	-0.45351	-0.11171	0.05919	-0.41689	0.4254	0.46202		2.3	0.01633
2.35	1.80406	2.44493	2.10923	2.20079	1.71251	1.49888	-0.82045	-3.26186	-4.36049	-4.11635	-2.22426	-1.85805	-0.08803	-1.06459		2.35	0.4175	0.23439	0.72267	-0.1013	0.6006	1.45509	1.08888	0.38698	0.81422	-0.19286	-0.1013	-0.77269	-1.81029	-0.9558		2.35	-0.2705	1.51173	2.04884	1.20655	1.97559	0.97462	1.14552	-0.34374	-0.55126	-0.35595	-0.53905	-0.42919	1.35304	0.53516		2.35	-0.10569
2.4	2.04809	2.68896	1.77344	2.26172	1.40722	1.04101	-0.63745	-2.40747	-4.14697	-4.81836	-3.10938	-2.31592	-0.21021	-0.75952		2.4	0.50905	0.14284	0.50905	-0.04027	0.96681	1.45509	0.78371	0.6006	0.93629	-0.13182	-0.28441	-0.83372	-1.81029	-1.04735		2.4	-0.11191	1.20645	1.8168	1.04776	2.12198	1.02335	1.23087	-0.07529	-0.72226	0.16886	-0.33163	-0.2706	1.45059	0.15665		2.4	-0.16667
2.45	1.46815	2.65834	2.07851	1.83437	1.83437	1.80385	-1.24791	-2.49913	-3.59776	-4.97105	-2.98741	-2.01085	0.09486	-0.48497		2.45	0.47853	0.11232	0.44801	0.20387	1.14992	1.54665	0.90578	0.66164	0.69215	0.02077	-0.71165	-1.1389	-1.56615	-1.04735		2.45	0.14434	1.36505	1.57257	1.37725	1.73126	0.7547	1.13311	0.05889	-0.6247	0.85235	-0.72236	0.43731	0.91339	-0.17304		2.45	-0.31921
2.5	1.25443	1.49857	2.23099	2.35306	1.68167	1.52908	-1.33957	-2.56027	-3.59787	-4.84909	-2.957	-2.65182	-0.66818	-0.60715		2.5	0.38698	0.29543	0.4175	0.0818	1.42458	1.30251	0.96681	0.90578	0.50905	0.14284	-1.32201	-1.19994	-1.59666	-1.01683		2.5	-0.34403	1.35274	1.43819	1.6335	1.74337	1.23067	0.4128	-0.06327	-0.99101	0.97432	-0.53935	0.35177	0.43721	-0.29521		2.5	-0.71588
2.55	0.79656	1.31536	2.44451	2.13933	1.98674	1.68157	-1.18708	-3.01814	-3.96418	-4.81868	-2.37727	-2.83503	-0.63777	-0.54622		2.55	0.32594	0.26491	0.66164	0.0818	1.36354	1.08888	0.84474	1.02785	0.32594	0.17336	-1.68822	-0.98631	-1.71873	-1.38304		2.55	-0.35634	1.90196	1.75548	1.73106	1.4503	0.96202	0.19298	0.10753	-0.99111	0.94981	-0.44179	0.43712	-0.17323	-0.61269		2.55	-0.74635
2.6	0.88801	0.88801	2.23078	2.04767	2.01716	1.62043	-0.82098	-2.37738	-4.63568	-4.60516	-1.88909	-3.35394	-1.27874	-1.27874		2.6	0.11232	0.20387	0.75319	0.05128	1.39406	1.1194	0.75319	0.99733	0.14284	0.38698	-1.71873	-0.77269	-1.8408	-1.62718		2.6	-0.62499	1.71876	1.87745	2.02393	1.73097	0.77882	0.59571	0.24171	-1.19872	0.47364	-0.38085	0.42481	0.11964	-0.42968		2.6	-0.9294
2.65	1.13204	1.13204	2.47481	1.80343	1.9255	2.23067	-0.54643	-3.07938	-4.54423	-5.39872	-2.10282	-4.08646	-0.63798	-1.3704		2.65	0.0818	0.29543	0.78371	-0.04027	1.42458	1.14992	0.47853	1.02785	0.38698	0.6006	-1.81029	-0.437	-1.99339	-1.62718		2.65	-0.66171	1.49893	2.02384	2.14591	1.7919	0.37589	0.68106	-0.39316	-0.85702	0.10733	0.26602	0.14395	0.18058	-0.42978		2.65	-0.71572
2.7	0.79624	1.49815	2.87144	1.5897	1.52866	2.01695	-0.82119	-2.86587	-4.60537	-5.67348	-1.85879	-3.68984	-0.88222	-2.13344		2.7	0.0818	0.29543	0.72267	0.17336	1.1194	1.08888	0.53957	1.05836	0.78371	0.57008	-1.56615	-0.37596	-1.74925	-1.87132		2.7	-0.56415	1.21807	1.46222	2.36554	2.03595	0.52227	0.5589	-0.39325	-0.62519	-0.71064	0.46124	0.24151	0.49786	-0.1247		2.7	-0.41049
2.75	1.34545	1.62011	3.20703	1.89477	0.97924	1.71166	-0.66871	-3.50684	-4.14771	-6.22291	-2.80494	-3.93409	-0.91285	-1.73682		2.75	-0.07079	0.50905	0.29543	0.29543	0.69215	1.05836	0.90578	0.90578	0.75319	0.35646	-1.1389	-0.52855	-1.59666	-2.02391		2.75	-0.14921	1.21798	1.20577	1.71847	2.24337	0.86397	0.11934	-0.63749	-0.71073	-0.91825	0.90059	0.22921	0.26583	-0.49101		2.75	-0.1663
2.8	1.10121	2.29139	2.9933	1.86415	1.07069	1.31483	-1.24865	-3.23229	-3.69005	-5.58214	-2.59142	-3.11022	-1.37072	-1.79796		2.8	0.23439	0.72267	0.11232	0.26491	0.35646	0.81422	1.08888	0.90578	0.69215	0.23439	-1.19994	-0.55907	-1.71873	-1.99339		2.8	0.40001	1.73057	0.76622	1.46202	2.10899	1.02257	0.33897	-0.29579	-0.8329	-0.90614	0.31456	0.59532	-0.1371	-0.08827		2.8	0.04738
2.85	1.46731	2.53543	1.86404	2.6575	0.55179	0.46023	-0.6384	-3.65964	-2.98825	-5.58225	-2.92722	-3.38498	-1.46237	-1.03513		2.85	0.47853	0.53957	0.26491	0.38698	0.05128	0.72267	1.14992	0.99733	0.35646	0.17336	-1.1389	-0.74217	-1.6577	-1.77977		2.85	0.11915	1.71827	0.81495	0.85157	2.14552	1.43751	0.39991	-0.38134	-1.37011	-0.52782	0.08253	0.33888	-0.57665	0.02149		2.85	-0.07464
2.9	1.77238	2.87102	1.86394	2.44377	0.55168	0.49065	-0.91316	-3.2325	-2.92732	-4.94148	-2.04231	-3.59871	-0.91316	-1.58455		2.9	0.50905	0.50905	0.0818	0.0818	0.05128	0.57008	1.27199	0.72267	0.26491	0.29543	-1.16942	-1.01683	-1.38304	-1.50511		2.9	0.08243	2.75577	1.01016	0.53409	1.71817	1.08341	0.63175	-0.10068	-1.5289	-0.12509	-0.28378	0.19229	-1.07724	0.15567		2.9	-0.16614
2.95	1.74176	2.41315	1.95538	2.90143	0.67365	0.39899	-0.2724	-3.32416	-3.41571	-4.789	-1.79828	-3.81244	-1.18792	-0.66913		2.95	0.44801	0.53957	0.02077	-0.55907	0.29543	0.32594	1.1194	0.44801	0.38698	0.23439	-1.26097	-0.89476	-1.07787	-1.47459		2.95	-0.06415	2.96319	1.31524	0.82696	2.20636	1.04669	0.60724	0.08233	-1.84638	-0.43036	-0.6623	-0.03974	-0.60126	-0.24726		2.95	-0.16608
3	1.68062	2.1689	2.6877	2.38253	1.28389	1.55855	-0.51664	-3.08012	-3.26323	-4.20927	-1.79838	-3.75151	-0.91337	-0.94389		3	0.11232	0.53957	0.23439	-1.01683	0.38698	0.57008	1.05836	0.38698	0.4175	0.20387	-1.23045	-0.65062	-0.80321	-1.59666		3	0.46065	2.8044	1.94991	1.36397	2.18184	0.60714	0.61934	-0.25956	-1.56571	-0.1497	-0.54032	-0.28398	-0.47929	-0.35722		3	-0.44069
3.05	0.88706	2.01621	2.93174	1.49741	1.68052	1.61948	-0.39468	-2.77505	-3.41592	-4.08731	-2.62246	-2.95816	-1.43228	-0.24209		3.05	-0.07079	0.75319	0.50905	-1.32201	0.44801	0.69215	1.21095	0.38698	0.6006	0.38698	-1.19994	-0.437	-0.71165	-1.56615		3.05	0.63145	2.37706	2.02306	1.88878	1.88878	0.31407	1.03429	-0.17421	-1.21181	-0.49159	-0.80898	0.25304	-0.5038	-0.07655		3.05	-0.50167
3.1	0.91747	1.52782	2.50439	0.85644	1.92455	1.68041	-0.85255	-2.86671	-3.26344	-3.47706	-3.0193	-3.47706	-1.24928	0.2766		3.1	-0.07079	1.05836	0.72267	-1.16942	0.35646	0.47853	1.14992	0.26491	0.84474	0.32594	-1.07787	-0.34544	-0.9558	-1.50511		3.1	0.50929	1.98634	2.49903	1.96192	1.10743	-0.01562	1.44923	-0.39403	-0.47948	-0.57714	-0.17431	0.37501	-0.12548	-0.02782		3.1	-0.59317
3.15	1.40565	1.52772	2.65687	0.39857	2.07703	1.25306	-1.15783	-3.04992	-3.5382	-2.83629	-3.26354	-2.89733	-1.00524	0.91737		3.15	-0.1013	1.05836	0.81422	-0.52855	0.17336	0.63112	1.18044	-0.00975	0.81422	0.29543	-0.80321	-0.52855	-1.04735	-1.41356		3.15	0.11856	2.20597	2.49893	2.27921	0.69229	0.15518	1.76651	0.27726	0.37491	-0.45517	0.13077	0.78995	0.13077	0.22843		3.15	-0.7457
3.2	1.64968	1.74124	2.56521	1.13088	1.83279	1.19192	-1.37156	-3.69089	-3.38572	-2.28708	-3.38572	-3.38572	-1.00534	0.91726		3.2	-0.04027	0.99733	0.69215	-0.00975	0.32594	0.72267	1.08888	-0.437	0.66164	0.35646	-0.74217	-0.77269	-1.19994	-1.07787		3.2	-0.39423	1.98614	2.52325	1.97394	1.20489	0.98517	1.26593	-0.05243	0.10626	-0.41864	-0.0036	0.83868	0.25274	-0.13788		3.2	-0.68461
3.25	1.49699	1.19181	2.80925	1.22233	2.13786	0.88664	-1.28011	-3.47737	-4.05721	-2.31771	-3.1722	-2.31771	-1.06649	-0.18148		3.25	0.23439	0.78371	0.72267	0.47853	0.50905	0.69215	0.84474	-0.83372	0.66164	0.38698	-0.83372	-0.86424	-1.50511	-0.9558		3.25	0.05733	2.0837	2.27901	1.85177	1.47335	0.94845	0.76534	-0.40653	-0.12577	0.25265	-0.29667	0.58224	-0.23564	-0.02812		3.25	-0.7456
3.3	0.97809	0.79498	2.16827	1.98517	1.55792	0.70343	-0.914	-3.6911	-4.36249	-2.13471	-3.01972	-2.4704	-1.46332	-0.24262		3.3	0.35646	0.4175	0.66164	0.66164	0.53957	0.78371	0.84474	-1.07787	0.26491	0.38698	-0.80321	-0.98631	-1.87132	-1.10838		3.3	0.37462	1.65636	1.69298	1.71739	1.9127	0.92394	0.38683	-0.28456	-0.65077	-0.02821	-0.62636	0.65538	-0.58974	-0.12587		3.3	-0.71502
3.35	0.88643	0.15401	1.67989	2.13765	1.31367	1.22212	-0.97514	-3.08086	-4.60674	-2.37895	-2.53154	-2.34843	-0.85307	-0.82256		3.35	0.50905	0.35646	0.29543	0.6006	0.57008	0.78371	0.90578	-1.44408	0.17336	0.47853	-0.89476	-0.9558	-2.08495	-1.23045		3.35	0.38673	1.5586	1.48536	1.5464	1.99806	0.88722	-0.27245	-0.22362	-1.06591	0.10597	-0.24804	0.11817	-0.85839	0.04493		3.35	-0.77601
3.4	1.16098	0.4896	1.64926	1.8934	0.88632	1.61875	-0.39541	-3.63028	-4.14908	-2.2875	-2.65371	-2.47061	-1.09732	0.36753		3.4	0.6006	0.29543	0.23439	0.47853	0.63112	0.53957	0.78371	-1.04735	0.29543	0.17336	-1.1389	-0.74217	-2.29857	-1.56615		3.4	-0.34579	1.5463	0.89933	1.61954	1.99796	1.14347	0.1547	0.38663	-1.33456	-0.15048	-0.07724	0.22794	-1.2369	0.31339		3.4	-1.11165
3.45	1.22191	1.13036	1.09984	1.95433	1.49657	2.74779	-0.85328	-3.56935	-3.63038	-2.31813	-2.13502	-2.22657	-0.365	0.06224		3.45	0.35646	0.26491	0.11232	0.47853	0.72267	0.66164	0.66164	-0.46751	0.29543	-0.04027	-1.04735	-0.71165	-2.20702	-1.96288		3.45	-1.13935	1.21661	0.58185	1.1922	1.87579	1.48517	0.4964	0.41095	-1.46894	-0.29706	0.03253	0.39874	-0.82196	0.47198		3.45	-1.05056
3.5	1.77112	1.37439	1.43543	1.43543	2.13733	2.28992	-0.48718	-3.63049	-3.35583	-2.37927	-2.56237	-2.47082	-0.5177	0.36731		3.5	0.23439	0.4175	-0.1013	0.23439	0.87526	0.87526	0.69215	-0.19286	0.50905	0.23439	-0.74217	-0.68114	-2.20702	-1.81029		3.5	-1.04179	1.09444	0.65499	1.14327	1.5339	1.1921	0.80147	0.58175	-0.63896	-0.13847	0.20333	0.52071	-0.63896	0.61837		3.5	-1.01999
3.55	2.47292	1.31325	1.37429	1.67947	2.01516	1.83205	-1.06712	-3.47801	-3.87473	-2.0742	-3.14231	-2.28782	-0.39573	0.03152		3.55	-0.00975	0.47853	-0.1013	-0.04027	0.81422	1.08888	0.69215	-0.00975	0.63112	0.4175	-0.55907	-0.68114	-2.29857	-1.47459		3.55	-0.79774	1.05772	1.20421	1.11876	1.69249	1.0211	1.09435	0.37413	-0.22401	-0.48036	-0.28505	1.0211	-0.71229	0.06896		3.55	-0.92838
3.6	2.25919	0.73332	1.86247	1.64884	2.07609	1.00797	-1.0367	-3.60018	-3.47811	-1.92171	-3.84432	-2.04378	-0.60946	-0.60946		3.6	-0.04027	0.44801	-0.19286	-0.16234	0.4175	1.27199	0.78371	-0.34544	0.53957	0.63112	-0.437	-0.92528	-2.08495	-1.32201		3.6	0.22755	1.96095	1.68019	1.11866	1.31398	0.55714	1.48487	0.04444	0.1421	-0.57811	-0.52929	1.26515	-0.76122	-0.35839		3.6	-0.7147
3.65	2.47271	0.70269	2.13702	1.52667	1.46563	0.85528	-1.12836	-3.93598	-3.23407	-1.58613	-3.75287	-1.67768	-0.97577	-0.76215		3.65	-0.13182	0.63112	-0.37596	-0.437	0.4175	1.27199	0.63112	-0.49803	0.6006	0.72267	-0.28441	-0.98631	-2.02391	-1.38304		3.65	0.55704	2.4003	1.61905	1.28946	1.46036	0.55704	1.92423	0.23966	0.47159	-0.92001	-0.23642	1.61905	-0.89559	-0.95663		3.65	-0.77569
3.7	1.5876	1.37397	1.61811	1.19087	1.34346	1.28242	-1.43364	-3.87505	-3.02056	-2.04399	-3.60039	-1.46416	-1.06743	-1.28105		3.7	-0.07079	0.75319	-0.40648	-0.55907	0.75319	1.18044	0.23439	-0.68114	0.84474	0.53957	-0.19286	-0.77269	-2.02391	-1.81029		3.7	0.60577	2.22931	2.09503	0.9964	1.41144	0.75226	0.95978	-0.00458	0.00763	-0.88349	0.00763	1.24054	-0.33417	-0.82245		3.7	-0.65356
3.75	0.88559	1.52646	1.86215	0.85507	0.88559	0.76352	-1.5253	-3.84464	-3.20377	-1.58634	-3.35636	-0.88443	-1.15909	-0.60977		3.75	-0.19286	0.69215	-0.28441	-0.437	1.05836	1.33302	0.02077	-0.77269	0.66164	0.29543	-0.07079	-0.68114	-2.11546	-2.20702		3.75	0.56905	1.94845	2.00948	1.13058	0.9963	0.72774	0.42257	0.04415	-0.0413	-0.52958	0.36153	0.72774	-0.19999	-0.7371		3.75	-0.4704
3.8	0.45824	1.86204	1.67894	1.31273	0.85496	1.09911	-2.0442	-3.0818	-3.47853	-1.83058	-3.05129	-0.79298	-0.91505	-1.12868		3.8	-0.25389	0.72267	-0.437	-0.25389	1.48561	1.45509	0.11232	-0.49803	0.32594	0.44801	-0.00975	-0.6201	-2.3596	-2.42064		3.8	-0.11464	1.5211	1.8629	1.19151	1.21593	1.11827	0.1295	-0.41981	-0.37099	-0.63954	-0.38319	0.6422	-0.38319	-0.59071		3.8	-0.5619
3.85	0.15296	1.8009	1.92297	1.28211	0.94641	1.03797	-1.61706	-3.20398	-3.47864	-1.43396	-3.26501	-0.54895	-1.03723	-0.54895		3.85	-0.13182	0.50905	-0.49803	-0.25389	1.76027	1.33302	0.20387	-0.34544	0.05128	0.57008	-0.1013	-0.25389	-2.75633	-2.3596		3.85	-0.11474	1.89942	2.18019	1.37452	1.27687	1.27687	0.21485	-0.94481	-0.54198	-0.31005	-0.84716	0.32472	-0.52977	-0.51757		3.85	-0.62288
3.9	0.64113	1.77028	2.16701	1.55666	0.36647	1.37355	-1.92234	-3.02098	-3.84495	-1.86131	-2.83787	-1.03733	-0.76268	-0.76268		3.9	-0.19286	0.02077	-0.37596	-0.25389	1.57716	1.36354	0.38698	-0.1013	-0.25389	0.23439	0.02077	-0.07079	-2.72581	-2.29857		3.9	-0.42001	1.69181	2.2045	1.37442	1.64298	1.53312	0.49552	-0.65194	-0.34677	-0.33456	-1.43319	0.71525	-0.9205	-0.44442		3.9	-0.43972
3.95	1.15983	1.89225	2.07535	1.64811	1.22086	0.70206	-1.80038	-3.29574	-4.15023	-1.28158	-2.74642	-1.09847	-0.24398	-0.2745		3.95	-0.1013	-0.49803	-0.37596	-0.25389	1.33302	1.48561	0.6006	-0.00975	-0.28441	-0.07079	0.17336	-0.00975	-2.39012	-2.32909		3.95	-0.42011	1.81378	2.24103	0.82501	1.69171	1.45978	0.17804	-0.92059	-0.77411	-0.33466	-1.54315	0.32452	-0.82294	0.43438		3.95	-0.47019
4	1.67852	1.49541	2.19732	1.25127	1.31231	0.54937	-1.80048	-2.8686	-4.6081	-1.92256	-1.92256	-1.73945	-0.0915	-0.51875		4	0.29543	-0.86424	-0.49803	-0.19286	1.24147	1.33302	0.35646	-0.19286	-0.00975	-0.34544	0.20387	-0.00975	-2.26805	-2.42064		4	-0.34696	2.07003	1.81368	1.10567	1.8503	0.8005	0.39767	-0.96952	-0.68876	-0.16386	-0.81083	0.01925	-0.5911	0.72726		4	-0.43962
4.05	2.10566	1.70893	2.19721	1.03754	1.6479	0.57978	-1.67852	-2.77715	-4.11993	-2.13628	-2.44146	-1.40386	-0.51885	-0.21368		4.05	0.53957	-1.29149	-0.74217	0.23439	1.05836	1.36354	0.20387	-0.25389	0.32594	-0.31493	0.17336	-0.13182	-2.02391	-2.57323		4.05	-0.26161	1.78917	1.74034	0.99571	2.10655	0.87364	0.56847	-0.78651	-0.61561	-0.38368	-0.53017	0.89806	-0.35927	0.84923		4.05	-0.47008
4.1	2.07504	1.92245	1.92245	0.94589	1.89193	0.2745	-1.25138	-3.0214	-4.21158	-2.96036	-2.62467	-1.2819	-1.22086	-0.03068		4.1	0.32594	-1.8408	-0.89476	0.32594	0.96681	1.42458	0.23439	-0.22337	0.4175	-0.00975	0.14284	-0.25389	-1.74925	-2.51219		4.1	-0.00536	1.88673	1.54493	1.25196	1.39845	0.53175	0.22657	-0.84765	-0.6035	-0.38378	-0.12743	1.25196	0.0923	0.4463		4.1	-0.83624
4.15	1.86131	1.92234	1.61717	1.22044	1.86131	0.48802	-1.34304	-2.89943	-3.90651	-2.99098	-3.72341	-0.36647	-1.37355	0.12181		4.15	0.11232	-2.26805	-1.01683	0.20387	0.90578	1.18044	0.32594	-0.37596	0.57008	0.05128	-0.00975	-0.22337	-1.59666	-2.3596		4.15	-0.78671	1.44718	1.01993	1.33732	1.27628	0.62931	0.18985	-0.78671	-0.46933	-0.23739	0.11661	0.84903	0.31193	-0.44491		4.15	-0.92774
4.2	1.70862	1.70862	1.06775	1.80017	2.10534	-0.000368069	-0.85486	-3.23523	-3.81507	-3.41834	-3.60144	-0.15295	-1.16004	0.36584		4.2	-0.19286	-2.54271	-0.74217	0.14284	0.90578	0.78371	0.32594	-0.22337	0.29543	-0.04027	0.02077	-0.04027	-1.74925	-2.1765		4.2	-1.1164	1.37384	1.28839	1.10528	1.10528	0.34845	-0.21307	-0.93329	-0.90888	-0.28632	-0.21308	0.58038	0.21417	-0.4206		4.2	-1.01924
4.25	1.3423	1.43385	1.22023	2.0442	1.3423	0.42677	-0.97704	-3.20482	-4.27293	-3.96776	-3.35741	0.33522	-1.00755	-0.09203		4.25	-0.46751	-2.63426	-0.71165	0.20387	0.96681	0.6006	0.29543	-0.07079	-0.04027	-0.19286	0.17336	-0.22337	-1.62718	-2.26805		4.25	-1.11649	1.17843	1.21505	1.60567	1.21505	-0.27421	-0.0911	-0.83573	-1.39726	0.10421	-0.0789	0.2629	-0.04227	-0.23759		4.25	-0.92763
4.3	1.22012	1.06754	1.34219	2.53238	1.18961	0.60977	-0.06161	-3.26596	-4.45614	-4.12045	-2.25888	0.06046	-0.76352	0.12149		4.3	-0.437	-2.8784	-0.89476	0.20387	0.96681	0.53957	0.26491	0.17336	0.02077	-0.19286	-0.00975	-0.37596	-1.62718	-1.99339		4.3	-0.81141	1.1295	1.44689	1.67882	1.48351	-0.22548	0.21398	-0.6161	-1.72694	-0.11561	-0.14003	0.22618	-0.71376	0.38487		4.3	-0.71395
4.35	1.1895	1.73882	1.5252	2.50176	0.94536	0.88433	-0.24482	-2.68623	-4.42573	-4.24263	-2.25898	0.21294	-1.12983	-0.15327		4.35	-0.31493	-3.33617	-0.89476	0.20387	0.87526	0.53957	0.14284	0.38698	0.23439	-0.37596	-0.25389	-0.46751	-1.74925	-2.02391		4.35	-0.06688	1.33693	1.39796	2.03273	1.26368	-0.28661	0.51905	-1.16552	-1.27538	-0.56737	-0.46972	-0.03026	-0.7871	0.54347		4.35	-0.86649
4.4	0.79267	1.40302	2.19648	2.04389	0.57905	1.49457	-0.45855	-2.59478	-4.27325	-3.99859	-2.35064	-0.45855	-0.79424	-0.24493		4.4	-0.07079	-3.54979	-0.80321	0.02077	0.6006	0.84474	0.23439	0.11232	0.38698	-0.46751	-0.37596	-0.25389	-1.77977	-2.23753		4.4	0.10392	1.34903	1.1171	1.94718	1.31241	-0.21347	0.50675	-0.59188	-1.10458	-0.6163	-0.6285	-0.48202	-0.37216	0.33585		4.4	-0.95799
4.45	1.09774	0.82308	1.8912	2.31844	0.06014	1.43343	-0.42814	-2.56437	-4.63957	-4.73112	-2.9611	-0.51969	-0.30607	-0.64176		4.45	0.23439	-3.36668	-0.71165	-0.49803	0.66164	0.96681	0.4175	0.0818	0.50905	-0.40648	-0.46751	0.05128	-1.99339	-1.90184		4.45	0.44562	1.19025	1.17804	1.51984	1.56866	-0.4455	0.32355	-0.37225	-1.70282	-0.81171	-0.83612	-0.38446	-0.12811	0.62872		4.45	-1.35466
4.5	1.12815	0.85349	1.46384	1.5554	-0.45876	1.31126	-0.88601	-2.56447	-4.12087	-4.97536	-3.11379	-0.73342	-0.12307	-0.39773		4.5	0.32594	-3.2141	-0.28441	-0.49803	0.57008	1.14992	0.90578	0.14284	0.63112	-0.40648	-0.77269	0.35646	-2.02391	-1.56615		4.5	0.34786	1.54415	1.04366	1.54415	1.38546	-0.68974	0.11593	-0.42118	-2.03251	-0.71415	-0.82401	-0.49442	0.238	0.66525		4.5	-1.5072
4.55	1.03649	0.60925	1.61633	1.15856	-0.36732	0.67028	-0.97767	-2.83924	-4.30408	-5.18909	-3.08338	-0.73353	-0.55042	-0.3368		4.55	0.14284	-2.90892	-0.07079	-0.37596	0.4175	1.21095	1.21095	0.11232	0.4175	-0.58958	-0.89476	0.35646	-1.87132	-1.19994		4.55	-0.15272	1.6295	1.39757	1.39757	1.09239	-0.22597	0.15245	0.04259	-2.04481	-0.50673	-0.31141	-0.67763	0.15245	0.67736		4.55	-1.35456
4.6	1.55519	1.12794	1.67726	1.18898	0.51759	0.30397	-1.58812	-2.50365	-4.45678	-4.70092	-2.9309	-1.28295	-1.43553	-0.52001		4.6	0.14284	-2.60374	-0.22337	-0.49803	0.75319	0.99733	1.33302	0.14284	0.29543	-0.77269	-1.07787	0.35646	-1.93236	-0.83372		4.6	-0.58007	1.49513	1.72706	0.94581	0.67726	-0.12841	-0.05516	0.14015	-2.0327	-0.56786	-0.20165	-0.38475	0.04249	0.35988		4.6	-1.44605
4.65	1.28042	1.37198	2.31802	1.21939	0.67007	0.73111	-1.3746	-3.20566	-4.76206	-4.6705	-2.83945	-1.31357	-1.77133	-0.64218		4.65	-0.13182	-2.57323	-0.22337	-0.77269	0.96681	0.53957	1.1194	-0.07079	0.23439	-0.9558	-1.23045	0.44801	-2.26805	-0.89476		4.65	-1.05624	1.15323	1.71476	1.12882	0.98234	-0.15292	0.31095	0.46964	-1.59335	-0.33602	-0.15292	-0.1163	0.26212	-0.04305		4.65	-1.56807
4.7	0.88359	1.21928	2.19585	2.25688	0.79204	0.85307	-0.88643	-3.20577	-4.73164	-4.8232	-3.02266	-1.37471	-1.64937	-0.91695		4.7	0.05128	-2.32909	-0.6201	-0.92528	1.02785	0.6006	1.14992	-0.19286	0.02077	-0.9558	-1.16942	-0.00975	-2.26805	-0.9558		4.7	-1.25165	1.07989	2.03204	1.15314	1.76349	0.2254	0.24982	0.50616	-1.21503	-0.66571	-0.03095	0.21319	0.21319	0.11554		4.7	-1.56802
4.75	1.09711	1.46332	1.89057	2.86713	0.33417	1.00556	-1.06964	-3.20587	-4.48761	-4.85382	-3.0838	-1.22223	-0.3067	-0.55084		4.75	-0.00975	-2.23753	-0.6201	-0.92528	0.99733	0.63112	1.14992	0.0818	0.05128	-0.65062	-1.41356	-0.28441	-2.11546	-1.23045		4.75	-0.83671	1.4338	2.15402	1.31173	1.84884	0.44503	-0.28739	0.23751	-1.10526	-0.76347	-0.10429	0.44503	-0.01884	-0.36063		4.75	-1.07968
4.8	1.12752	1.37166	2.1346	2.98909	0.05941	0.5782	-0.6425	-3.32805	-4.24357	-5.22014	-3.11442	-1.00871	-0.33732	-0.52043		4.8	-0.1013	-1.56615	-0.55907	-0.77269	0.6006	0.78371	0.96681	0.29543	0.17336	-0.71165	-1.44408	-0.83372	-1.50511	-1.44408		4.8	-0.69032	1.22618	1.71446	1.10411	2.16613	0.75011	-0.25087	0.00548	-1.0077	-0.50721	0.24962	0.11534	-0.05555	-0.51942		4.8	-0.77445
4.85	0.79172	1.12742	1.85984	2.65329	0.45603	0.30344	-0.4595	-2.99246	-3.60281	-5.28128	-2.41262	-1.13088	-0.00173	0.36448		4.85	-0.04027	-1.10838	-0.16234	-1.04735	0.4175	0.96681	1.21095	0.53957	0.29543	-0.52855	-1.74925	-0.92528	-1.29149	-1.53563		4.85	-0.43407	1.2505	1.53126	0.44484	2.09279	1.29933	0.10304	-0.34862	-1.25194	-0.58055	0.09083	-0.06786	-0.40966	-0.4829		4.85	-0.62181
4.9	0.73058	1.31042	1.76818	1.73766	0.54748	0.82214	-0.33753	-3.45033	-3.96912	-5.3119	-2.50428	-1.52772	-0.64271	0.08971		4.9	0.11232	-0.46751	0.14284	-1.01683	0.20387	0.90578	1.36354	0.32594	0.44801	-0.46751	-1.90184	-0.80321	-1.29149	-1.59666		4.9	-0.10458	1.29923	1.03068	0.54239	1.68986	1.2504	0.61564	-0.37313	-1.23983	-0.77596	-0.12899	0.17618	-0.62948	-0.16561		4.9	-0.65228
4.95	0.57789	1.76807	2.13429	1.4629	0.91358	1.06617	-1.03954	-3.02319	-4.15234	-4.97631	-2.0161	-2.38231	-0.2766	0.08961		4.95	0.14284	-0.07079	0.38698	-0.98631	-0.00975	1.08888	1.76027	0.17336	0.4175	-0.37596	-1.81029	-0.6201	-1.53563	-1.59666		4.95	-0.26337	1.15265	1.00616	0.7254	1.29913	1.38458	0.8963	0.15167	-1.26434	-0.51972	0.01739	-0.01923	-0.59296	0.13946		4.95	-0.65222
5	0.33364	1.46279	2.59194	1.40176	1.18814	1.1271	-1.34482	-2.80967	-4.30503	-5.15952	-2.29087	-2.22983	-0.9481	-0.6124		5	0.14284	0.14284	0.57008	-0.6201	-0.28441	1.02785	1.72975	0.0818	0.63112	-0.34544	-1.68822	-0.46751	-1.74925	-1.53563		5	-0.28788	1.34786	1.28683	1.18917	0.73751	0.98165	0.63986	0.00509	-1.52079	-0.38554	-0.17802	0.45675	-0.80057	-0.04374		5	-0.43855
5.05	0.7913	2.16459	2.77494	1.43217	1.18803	1.18803	-1.10079	-2.26046	-4.73238	-4.51876	-2.5046	-2.47408	-0.67354	-0.49044		5.05	0.14284	-0.31493	0.47853	-0.65062	-0.37596	1.02785	1.8213	0.05128	0.87526	-0.37596	-1.35252	-0.55907	-1.74925	-1.26097		5.05	-0.66639	1.18907	1.2379	1.46984	0.89611	0.24913	0.60314	-0.19032	-0.92274	-0.10487	-0.1537	0.49327	-0.47108	0.06603		5.05	-0.34694
5.1	0.91327	2.7138	2.95794	1.82879	1.37103	0.73016	-1.00934	-1.83331	-4.73248	-4.18317	-2.90143	-1.95538	-0.73468	-0.42951		5.1	0.35646	-0.80321	0.23439	-0.52855	-0.31493	0.75319	1.72975	-0.00975	1.30251	-0.00975	-1.23045	-0.34544	-1.47459	-0.9558		5.1	-0.76415	1.18898	1.3965	1.49415	1.09132	0.29786	0.66408	0.06593	-0.66649	0.02931	-0.08055	0.15138	0.06593	-0.06835		5.1	-0.22482
5.15	0.88264	2.95784	2.59163	2.10335	0.6385	0.88264	-0.7653	-1.65031	-4.85466	-4.00017	-2.80998	-1.86394	-0.36858	0.08919		5.15	0.35646	-1.35252	0.14284	-0.6201	-0.00975	0.87526	1.66872	-0.07079	1.42458	0.02077	-0.89476	-0.31493	-1.35252	-0.74217		5.15	0.07804	1.43302	1.04239	2.12882	0.90812	0.32218	0.59073	-0.58114	-0.87411	-0.17831	-0.48348	0.21232	0.56632	-0.45907		5.15	-0.59097
5.2	1.37082	2.71359	2.10324	1.70651	0.18064	0.33322	-0.61282	-1.07059	-4.33597	-3.63406	-2.71853	-1.6199	-0.64334	-0.24661		5.2	0.50905	-1.35252	-0.04027	-0.40648	0.17336	0.87526	1.60768	0.02077	1.54665	0.4175	-0.80321	-0.00975	-1.29149	-0.68114		5.2	0.33429	1.84796	0.71271	2.22638	0.56622	0.98126	0.72491	-0.71551	-1.05731	-0.12958	-0.77655	0.39532	0.90802	-0.23944		5.2	-0.8961
5.25	1.18761	2.13365	1.46227	1.76744	0.02794	0.1195	-0.61293	-2.04725	-3.84779	-3.90883	-2.84071	-2.10829	-1.22328	-0.03309		5.25	0.23439	-1.32201	0.11232	-0.58958	0.26491	1.02785	1.51613	0.32594	1.24147	0.69215	-0.65062	0.02077	-1.47459	-0.89476		5.25	0.96896	2.38497	1.13986	1.65255	0.12667	1.65255	0.61495	-0.77665	-1.09403	-0.36161	-0.36161	0.72482	1.0422	-0.1785		5.25	-0.95708
5.3	0.79078	1.30957	0.97388	1.03492	-0.18579	0.27198	-0.12475	-3.02392	-3.57324	-4.031	-2.56616	-2.53564	-1.28442	-0.33837		5.3	0.26491	-1.19994	0.26491	-0.46751	0.0818	1.14992	1.33302	0.4175	0.75319	0.99733	-1.10838	-0.07079	-1.32201	-0.74217		5.3	0.79796	2.34825	1.13976	1.11534	-0.01991	1.9088	0.44396	-0.92323	-1.27723	-0.59364	-0.26405	0.66368	0.95665	-0.30067		5.3	-0.89599
5.35	0.97378	1.09585	2.10293	0.4855	0.11928	0.57705	-0.49107	-3.48179	-3.48179	-4.30576	-2.8104	-2.56626	-1.68125	-0.0333		5.35	0.20387	-1.62718	0.81422	-0.52855	0.14284	1.21095	1.08888	0.35646	-0.13182	0.99733	-1.38304	-0.22337	-1.50511	-0.77269		5.35	-0.20311	1.70118	1.2007	0.688	0.65138	1.83546	0.91993	-0.39842	-1.06981	-0.43505	-0.11766	0.15089	0.82228	-0.05663		5.35	-0.49921
5.4	1.24833	1.46195	3.23197	0.60746	0.39384	1.52299	-0.76583	-3.32931	-4.42794	-3.69552	-2.01705	-2.71895	-1.04049	0.05814		5.4	0.26491	-2.05443	0.81422	-0.28441	0.23439	1.27199	0.81422	-0.04027	-0.55907	0.81422	-1.71873	-0.40648	-1.38304	-0.55907		5.4	-0.37411	1.3837	1.39591	0.70011	1.27384	1.53019	0.79777	-0.08114	-1.28964	-0.48397	-0.0079	-0.34969	0.30949	-0.04452		5.4	-0.43812
5.45	1.18719	1.24822	3.32342	1.09564	0.45477	1.46185	-0.91852	-2.4444	-4.7027	-3.54303	-2.4444	-2.07819	-1.01008	0.18011		5.45	0.05128	-2.45116	1.05836	-0.37596	0.66164	1.1194	0.90578	-0.22337	-0.80321	0.81422	-1.74925	-0.28441	-1.59666	-0.65062		5.45	-0.39862	1.27374	1.62775	1.26154	1.55451	0.89533	0.19952	-0.1911	-1.42401	-0.77704	-0.39862	-0.13007	-0.15448	-0.14227		5.45	-0.31599
5.5	1.52278	1.67537	2.86555	1.09553	0.66829	0.82087	-1.59001	-2.62761	-4.91643	-3.8178	-2.0783	-2.35296	-0.55242	0.05793		5.5	-0.28441	-2.81737	0.99733	-0.49803	0.84474	1.05836	0.72267	-0.77269	-0.40648	0.78371	-1.56615	-0.28441	-1.53563	-0.58958		5.5	-0.48417	1.02951	1.82296	1.28585	1.78634	0.90743	0.22384	-0.08134	-1.53397	-0.81376	-0.70389	-0.21561	-0.15458	-0.16678		5.5	-0.10232
5.55	1.12594	1.24801	2.37716	0.8818	0.75973	0.42404	-1.31546	-2.65824	-5.00809	-3.23807	-2.10892	-1.71219	-1.0408	-0.18631		5.55	-0.46751	-2.93944	0.96681	-0.68114	1.14992	0.75319	0.63112	-0.71165	-0.1013	1.08888	-1.56615	0.11232	-1.6577	-0.86424		5.55	-0.44764	1.67638	2.28673	1.43224	1.16368	0.54113	-0.08143	-0.00819	-1.71717	-0.45985	-1.04579	-0.3744	0.24816	-0.80165		5.55	-0.13278
5.6	0.66808	1.12584	2.19395	0.48497	0.60704	-0.18642	-1.80385	-2.4142	-5.16078	-3.05507	-2.4142	-2.04799	-0.8578	-0.52211		5.6	-0.46751	-3.2141	0.87526	-0.86424	1.1194	0.81422	0.29543	-0.89476	0.47853	0.75319	-1.38304	0.11232	-1.8408	-1.26097		5.6	-0.22801	2.03029	2.4087	1.67628	0.63869	-0.65526	-0.25243	-0.31346	-1.49755	-0.16698	-1.09471	-0.04491	0.16261	-0.75292		5.6	0.11141
5.65	0.45435	1.43091	2.56006	0.5459	1.18677	0.11865	-1.80395	-2.07861	-5.7102	-2.65845	-3.11621	-2.13965	-1.34619	-1.25464		5.65	0.02077	-3.12254	0.66164	-0.80321	1.21095	0.84474	0.44801	-1.04735	0.63112	0.53957	-1.62718	0.29543	-1.87132	-1.56615		5.65	0.04044	1.92033	2.49406	1.46867	0.52872	-0.98495	-0.24032	-0.11825	-1.0704	-0.13045	-1.10702	0.26017	-0.08163	-0.87508		5.65	-0.07164
5.7	0.14907	1.33925	2.07167	1.52236	1.03408	0.78994	-1.31578	-2.20079	-5.13047	-2.90269	-3.51304	-2.99424	-1.13267	-1.10215		5.7	0.14284	-2.90892	0.78371	-0.98631	1.39406	1.02785	0.38698	-0.83372	0.66164	0.17336	-1.29149	0.20387	-2.11546	-1.53563		5.7	0.32111	1.48077	2.40851	1.3587	0.58966	-0.7287	-0.44794	-0.25262	-0.70428	-0.66766	-0.66766	0.36993	-0.42352	-1.29022		5.7	-0.22417
5.75	-0.3088	1.30863	1.27811	1.46122	1.33915	1.06449	-1.19381	-3.11642	-5.10006	-2.32296	-3.0859	-2.96383	-0.6445	-1.40744		5.75	0.11232	-2.45116	0.57008	-0.68114	1.33302	0.96681	0.32594	-0.65062	0.47853	0.35646	-0.98631	0.20387	-2.11546	-1.1389		5.75	-0.13065	0.95578	1.65158	1.73703	0.66281	-0.20389	-0.36258	-0.81424	-0.53348	-0.92411	-0.741	0.40646	-0.22831	-1.16825		5.75	-0.34619
5.8	0.36248	1.67473	1.43059	1.00335	2.01043	1.24749	-0.98029	-3.69636	-4.73396	-1.77375	-3.20808	-1.80427	-1.01081	-0.82771		5.8	-0.00975	-2.02391	0.47853	-0.55907	1.45509	0.93629	0.32594	-0.16234	0.23439	0.53957	-0.52855	0.4175	-2.32909	-1.07787		5.8	-0.11854	0.55285	1.48058	1.81017	1.27306	0.32091	0.07677	-1.0829	-0.13075	-0.7411	-0.65565	0.4674	0.22326	-1.16835		5.8	-0.52924
5.85	0.94221	1.91877	1.43049	1.21687	2.43757	1.2779	-1.13299	-3.33025	-4.21526	-1.89593	-3.08611	-0.85833	-1.19402	-0.88885		5.85	0.05128	-1.77977	0.26491	-0.28441	1.39406	0.96681	0.17336	-0.00975	0.29543	0.53957	-0.25389	0.44801	-2.14598	-0.92528		5.85	0.33302	0.73585	1.37062	1.63917	1.41945	0.51613	-0.13085	-1.76659	-0.61913	-0.76561	-0.53368	0.47951	0.34523	-1.30272		5.85	-0.31556
5.9	0.82003	1.58297	1.64401	1.36935	2.40695	0.82003	-1.04154	-3.69657	-4.36796	-1.835	-2.90311	-0.12601	-2.07914	-0.82792		5.9	0.26491	-1.53563	0.35646	-0.28441	1.60768	0.66164	0.23439	-0.07079	0.0818	0.66164	-0.28441	0.57008	-1.99339	-0.98631		5.9	0.34513	0.41837	1.65128	1.13859	1.39494	0.2963	-0.53378	-1.75448	-0.93661	-0.71688	-0.83895	0.65031	0.32072	-1.03426		5.9	-0.43758
5.95	1.36924	1.39976	1.76597	1.43028	1.70494	0.75889	-0.49233	-3.66616	-4.33754	-2.75063	-2.8727	-0.40077	-1.86562	-1.37734		5.95	0.20387	-1.50511	0.47853	-0.40648	1.33302	0.72267	-0.04027	0.17336	0.23439	0.63112	-0.22337	0.35646	-1.6577	-0.86424		5.95	0.34503	0.23517	1.82208	0.73566	1.62677	0.68683	0.00324	-1.20526	-0.59491	-0.35077	-0.93671	0.38165	0.21075	-0.68036		5.95	-0.34598
6	1.00293	1.46069	2.07104	1.33862	0.97241	0.6062	-0.67554	-3.45264	-5.16162	-2.65918	-2.65918	-0.33985	-2.10987	-1.53003		6	0.4175	-1.35252	0.6006	-0.34544	1.18044	0.53957	-0.16234	0.17336	-0.04027	0.87526	-0.6201	0.32594	-1.41356	-0.9558		6	0.44259	0.68673	1.72433	0.85763	1.40695	1.02853	0.44259	-0.98563	-0.21659	0.05197	-1.02225	0.13742	0.41818	-0.14335		6	-0.43747
6.05	0.91127	1.64369	1.97938	1.36903	0.69765	0.2704	-1.19444	-2.90343	-4.85655	-2.99498	-2.87291	-0.98082	-1.31651	-0.91979		6.05	0.26491	-1.35252	0.84474	-0.22337	0.90578	0.69215	-0.46751	0.23439	-0.22337	0.57008	-0.65062	-0.04027	-1.38304	-1.01683		6.05	0.35704	0.84533	1.24816	1.28478	1.34581	0.99181	0.78429	-0.97352	-0.18006	-0.5951	-1.07118	0.60119	0.25939	0.39367		6.05	-0.31535
6.1	0.2703	1.76566	2.31497	1.491	0.69754	0.91116	-0.82834	-1.77438	-4.73459	-2.81198	-3.0256	-1.34714	-0.52316	-0.43161		6.1	0.26491	-1.01683	0.84474	0.20387	0.84474	0.38698	-0.34544	0.29543	-0.37596	0.23439	-1.04735	0.02077	-1.50511	-1.01683		6.1	0.1006	0.68654	1.24806	1.39454	1.60206	1.58986	0.43019	-0.48534	-0.15575	-0.81493	-0.99803	0.69874	0.21046	0.1006		6.1	-0.19323
6.15	0.57537	2.00969	2.1928	1.58245	0.4533	0.91106	-0.67585	-2.07966	-4.82624	-1.89656	-3.23933	-1.31672	-0.12654	-0.09602		6.15	0.02077	-0.98631	1.21095	0.0818	0.87526	0.44801	-0.31493	0.23439	-0.25389	-0.40648	-1.04735	-0.1013	-1.93236	-0.9558		6.15	0.21037	0.56437	1.28458	1.26017	1.57755	1.29679	-0.00936	-0.66854	0.01505	-1.2911	-0.72958	0.49113	0.33244	0.06388		6.15	-0.46783
6.2	1.67389	1.70441	1.857	1.30768	0.88044	1.06354	-0.55389	-2.62908	-4.61273	-1.59149	-3.45306	-1.31683	0.05646	-0.73699		6.2	0.14284	-0.71165	1.36354	-0.00975	0.69215	0.53957	-0.13182	0.29543	0.0818	-0.83372	-1.07787	-0.04027	-2.02391	-0.83372		6.2	-0.26581	0.63751	0.97931	0.91828	1.34552	0.83283	-0.31463	-0.88836	-0.26581	-1.59637	-1.08368	0.63751	0.14923	0.13702		6.2	-0.4983
6.25	1.79586	1.5212	2.07052	1.06344	1.70431	0.66671	-0.85917	-3.48368	-4.70438	-1.34745	-3.17851	-0.88969	-0.37089	-0.7371		6.25	0.20387	-0.65062	1.60768	-0.34544	0.57008	0.99733	0.02077	0.0818	0.20387	-1.1389	-0.58958	0.17336	-2.05443	-0.92528		6.25	-0.4246	0.66183	0.90597	0.46652	1.19894	0.52755	-0.48563	-0.72977	-0.37577	-1.24247	-1.55985	1.1257	-0.46122	-0.20487		6.25	-0.83394
6.3	1.88731	1.67368	1.91782	1.1854	1.5211	0.36143	-2.14101	-4.33828	-4.73501	-2.2936	-3.5143	-1.0729	-0.40151	-1.56118		6.3	0.53957	-0.19286	1.39406	-0.34544	0.26491	1.39406	0.05128	-0.07079	0.26491	-1.29149	-0.34544	0.35646	-1.68822	-0.9558		6.3	0.088	1.07677	1.1256	0.83263	0.6007	0.2589	-0.93739	-1.07167	-0.63221	-0.75428	-1.60878	0.36876	-0.7787	-0.29042		6.3	-0.65078
6.35	0.91064	1.42944	1.91772	1.27685	1.52099	0.42236	-1.95801	-3.88062	-4.55201	-2.56836	-3.45337	-1.073	-1.10352	-1.10352		6.35	0.63112	-0.13182	1.42458	-0.49803	0.26491	1.51613	-0.1013	0.02077	-0.07079	-1.10838	-0.1013	0.53957	-1.47459	-1.16942		6.35	0.20998	1.16212	1.14992	1.43068	0.20998	-0.0952	-1.08397	-1.21825	-1.3159	-0.77879	-1.63329	-0.14403	-1.15721	-0.22948		6.35	-0.58969
6.4	0.78846	2.19227	1.85658	1.24623	1.21571	0.81898	-1.68346	-3.54503	-4.49108	-2.32433	-3.36193	-1.19518	-1.10363	-1.10363		6.4	0.63112	-0.00975	0.99733	-0.25389	0.35646	1.33302	-0.34544	-0.07079	-0.34544	-0.83372	-0.22337	0.63112	-1.1389	-1.1389		6.4	0.63712	1.18644	1.17423	1.68693	0.40519	0.68595	-0.64461	-1.25497	-1.62118	-0.64461	-1.29159	-0.33944	-1.1329	-0.18075		6.4	-0.25394
6.45	0.05594	2.03958	1.76492	1.42923	1.45974	0.60525	-1.28684	-3.17893	-4.21652	-2.59909	-3.08737	-1.19528	-1.62253	-1.01218		6.45	0.44801	-0.28441	0.87526	-0.19286	0.6006	0.96681	-0.19286	0.05128	-0.77269	-0.34544	-0.37596	0.84474	-1.26097	-1.23045		6.45	0.90558	1.27179	1.43048	1.71124	0.61261	0.9422	-0.60809	-0.96209	-1.53583	-0.54706	-0.93768	-0.42499	-0.49823	-0.38837		6.45	-0.1013
6.5	0.36101	2.55827	1.61223	1.61223	1.03239	0.72722	-1.16487	-2.96541	-3.97249	-2.93489	-2.56868	-0.76814	-2.04988	-0.73763		6.5	0.4175	-0.28441	0.57008	-0.00975	0.29543	0.90578	-0.13182	0.11232	-0.6201	-0.19286	-0.55907	0.78371	-1.38304	-0.86424		6.5	0.36837	1.18624	1.05197	1.43039	1.22287	0.29513	-0.22977	-1.12088	-1.23075	-0.93778	-0.43729	-0.64481	-0.43729	-0.93778		6.5	-0.13176
6.55	0.33038	2.25299	2.13092	1.94782	0.63556	1.15436	-1.28705	-2.78241	-4.30829	-3.33172	-2.96551	-0.8598	-1.98895	-1.04291		6.55	0.23439	-0.31493	0.47853	-0.34544	0.20387	1.02785	0.14284	0.32594	-0.31493	-0.00975	-0.80321	0.63112	-1.68822	-0.89476		6.55	-0.22987	1.24718	0.64904	0.53917	1.68664	-0.36415	0.20958	-1.02333	-0.6327	-1.12098	-0.42518	-0.79139	-0.91346	-1.42616		6.55	-0.31482
6.6	0.63546	1.97823	1.88668	2.83272	0.29976	0.94063	-1.28715	-3.17924	-4.27787	-3.4539	-2.32475	-0.64628	-1.95854	-0.85991		6.6	0.11232	-0.00975	0.05128	-0.37596	-0.04027	1.08888	-0.00975	0.23439	0.17336	-0.19286	-0.9558	0.05128	-1.6577	-0.58958		6.6	-0.22997	1.66212	0.77101	0.02638	1.67433	-0.96239	0.11183	-0.99901	-0.4619	-1.01122	-0.291	-0.57176	-0.96239	-0.8037		6.6	-0.49787
6.65	1.30674	1.94761	1.15415	2.19175	0.7269	0.81846	-1.0126	-3.17935	-4.76626	-3.36245	-2.53848	-0.70742	-0.98208	-1.43984		6.65	0.02077	0.14284	-0.04027	-0.37596	0.23439	0.90578	0.02077	0.05128	0.35646	-0.31493	-1.16942	-0.25389	-1.81029	-0.77269		6.65	-0.86483	1.73527	1.23478	0.36808	1.18595	-1.18221	-0.26668	-0.86483	-0.40096	-0.93807	-0.25448	-0.44979	-0.40096	-0.77938		6.65	-0.1316
6.7	1.39818	2.06957	1.15404	1.06249	1.09301	0.45214	-1.28736	-3.85084	-4.79688	-3.91187	-3.0879	-1.28736	-1.07374	-1.56202		6.7	0.17336	0.4175	-0.07079	0.02077	0.20387	0.72267	-0.04027	-0.00975	0.66164	-0.6201	-1.19994	-0.40648	-1.71873	-0.77269		6.7	-1.08465	1.71076	2.02814	0.5633	1.0882	-0.91375	-0.07147	-0.4743	-0.51092	-1.13348	-0.37665	0.0506	-0.37665	-0.58417		6.7	0.05156
6.75	1.88636	1.97791	0.84876	0.48255	1.03187	0.391	-1.53161	-3.97301	-4.15612	-4.61388	-3.14904	-1.59264	-0.92126	-1.56213		6.75	0.05128	0.35646	0.32594	0.02077	0.44801	0.4175	0.17336	-0.16234	0.53957	-0.6201	-0.89476	-0.25389	-1.68822	-0.98631		6.75	-0.53543	1.73507	2.38205	0.81955	1.05148	-0.37674	0.55099	0.00167	-0.57206	-0.44999	-0.44999	0.20919	0.0383	-0.57206		6.75	0.35679
6.8	0.36038	1.48953	1.91677	0.60452	0.97073	0.94021	-1.37913	-3.63743	-4.43088	-4.73606	-3.2407	-1.71482	-1.19602	-1.1655		6.8	0.0818	0.20387	0.26491	0.14284	0.26491	0.29543	0.29543	0.0818	0.72267	-0.68114	-0.46751	-0.19286	-1.44408	-0.83372		6.8	-0.21815	1.58849	2.41857	1.00255	0.74621	-0.27918	0.72179	0.17248	-1.04823	0.12365	0.00158	0.35558	0.13585	-0.86512		6.8	0.05166
6.85	-0.00594	1.42839	1.91667	0.84855	0.60441	1.12321	-1.77596	-3.66805	-4.24788	-5.37703	-2.5389	-1.04354	-1.37923	-0.73836		6.85	-0.16234	-0.19286	0.44801	-0.13182	0.44801	0.35646	0.72267	0.0818	0.69215	-0.6201	-0.16234	-0.22337	-1.6577	-0.9558		6.85	-0.26707	1.08791	1.88136	1.08791	0.45314	-0.34032	0.77052	0.29445	-1.43895	0.19679	-0.29149	0.5508	0.08693	-0.57225		6.85	0.05172
6.9	-0.37226	1.67242	2.22174	1.36725	0.45172	0.7569	-1.92865	-3.21039	-4.0954	-5.43817	-2.60004	-0.73847	-0.95209	-0.31122		6.9	-0.07079	-0.07079	0.20387	-0.1013	0.29543	0.63112	1.08888	0.14284	1.08888	-0.74217	-0.25389	-0.22337	-1.62718	-0.9558		6.9	-0.16952	0.67277	1.51505	1.01457	0.42863	-0.1329	0.58732	0.57511	-1.54891	0.68498	-0.46248	0.31877	0.23332	-0.85311		6.9	-0.16185
6.95	0.39058	1.24507	1.79439	1.55025	0.23799	0.17696	-1.89824	-3.14946	-4.58379	-5.74345	-2.6917	-1.04375	-1.19633	0.6042		6.95	-0.22337	-0.1013	0.38698	-0.34544	0.57008	0.87526	1.39406	-0.19286	0.84474	-0.65062	-0.46751	-0.19286	-1.81029	-0.86424		6.95	0.17218	0.50177	0.70929	0.8924	0.83136	-0.18182	0.25763	0.1966	-1.7077	0.91681	-0.16961	0.07453	-0.27948	-0.10858		6.95	-0.1618
7	0.35996	1.33652	1.55014	1.45859	0.57358	0.05478	-2.14248	-3.14956	-4.73648	-6.14029	-2.75284	-1.16592	-1.13541	0.93979		7	-0.00975	0.11232	0.32594	-0.13182	0.53957	0.99733	1.54665	-0.46751	0.69215	-0.68114	-0.68114	-0.07079	-1.8408	-0.71165		7	0.13546	0.50168	0.8923	0.33078	1.68576	-0.25516	-0.25516	0.11105	-1.81766	0.62375	-0.47489	-0.21854	-0.03543	-0.09647		7	-0.40589
7.05	-0.09791	1.03124	1.15331	1.67211	0.29882	-0.09791	-1.95949	-3.21071	-4.79762	-6.23195	-2.99708	-2.29518	-1.65431	0.32933		7.05	-0.04027	0.02077	0.32594	-0.13182	0.72267	0.93629	1.51613	-0.71165	0.26491	-0.34544	-0.46751	0.0818	-2.05443	-0.6201		7.05	0.1964	0.85558	1.73449	0.34289	2.55236	-0.36512	-0.04774	0.0255	-1.74452	0.09875	-0.43836	-0.89002	-0.13319	-0.04774		7.05	-0.5279
7.1	0.72596	1.88562	0.9701	1.24476	0.17664	0.4513	-1.83752	-2.90563	-4.70617	-6.72033	-2.63098	-2.35632	-2.08166	-0.7694		7.1	0.0818	0.23439	-0.22337	0.0818	0.66164	0.78371	1.39406	-0.49803	0.38698	-0.13182	-0.55907	0.05128	-2.11546	-0.86424		7.1	-0.08446	1.02638	1.61232	0.72121	2.40578	-0.38963	0.23293	-0.13329	-1.80565	-0.67039	-0.90233	-0.73143	-0.02342	-0.74364		7.1	-0.89406
7.15	0.78689	1.39724	1.06154	1.30569	0.42068	0.45119	-1.37986	-2.63108	-4.49265	-6.17112	-2.1428	-2.63108	-1.65452	-1.74607		7.15	-0.22337	-0.00975	-0.16234	-0.00975	0.50905	0.90578	1.08888	-0.40648	0.35646	0.11232	-0.65062	-0.25389	-2.3596	-1.04735		7.15	-0.14559	0.76994	1.24601	0.39152	1.58781	-0.52401	0.19621	0.0131	-1.64706	-0.73153	-0.60946	-0.81698	-0.41414	-1.0367		7.15	-0.80245
7.2	1.54972	1.5192	1.73283	1.45817	0.32902	0.54264	-1.34945	-2.44808	-4.76742	-5.92708	-2.02083	-2.78377	-1.07479	-1.34945		7.2	-0.31493	0.05128	-0.16234	0.0818	0.35646	0.87526	0.99733	-0.16234	0.47853	0.17336	-0.89476	-0.58958	-2.60374	-1.41356		7.2	-0.09686	0.36701	1.38019	0.26935	0.92853	-0.24334	-0.03582	0.26935	-1.3908	-0.73163	-0.341	-0.46307	-0.04803	-1.36639		7.2	-0.61929
7.25	1.39703	1.27496	2.19049	1.12237	0.57305	0.57305	-1.92939	-2.4787	-5.40839	-6.35444	-1.80732	-2.14301	-0.2204	-0.95283		7.25	-0.58958	-0.22337	-0.1013	-0.00975	0.38698	1.1194	1.08888	-0.00975	0.44801	0.11232	-0.89476	-0.77269	-2.60374	-1.47459		7.25	-0.26786	0.51339	1.52658	0.3425	0.46457	0.03732	-0.45096	0.3547	-1.95243	-0.73172	-0.19461	-0.59745	0.26925	-1.01248		7.25	-0.25303
7.3	1.30537	1.24434	2.00727	1.42744	0.72554	0.90864	-2.87554	-2.87554	-4.85918	-6.07988	-2.32622	-2.35674	-0.09844	-0.09844		7.3	-0.6201	-0.1013	-0.07079	-0.00975	0.26491	1.02785	1.45509	0.05128	0.57008	-0.00975	-1.04735	-0.58958	-2.63426	-1.77977		7.3	-0.70741	0.84289	1.40441	0.37902	0.48888	0.30578	0.07384	0.47668	-1.87928	-0.58534	-0.37782	-0.5243	0.6842	-0.54871		7.3	-0.40556
7.35	1.18319	1.51889	1.12216	0.90854	0.17612	0.90854	-2.6315	-2.69254	-4.73722	-5.43912	-2.99771	-2.32633	-0.25113	0.38974		7.35	-0.71165	-0.13182	0.0818	-0.07079	0.0818	1.30251	1.42458	0.02077	0.63112	-0.13182	-0.92528	-0.52855	-2.54271	-1.77977		7.35	-0.68309	0.95265	1.57521	0.13478	0.95265	0.80617	0.56203	0.08595	-2.11131	-0.67088	-0.63426	-1.13475	0.48879	-0.6953		7.35	-0.40551
7.4	0.57274	1.12205	1.18309	1.82396	0.14549	0.72533	-2.17384	-2.93678	-4.40163	-5.2256	-3.39455	-2.20436	-0.83107	0.08446		7.4	-0.52855	0.0818	0.35646	0.05128	-0.07079	1.45509	1.30251	0.05128	0.75319	0.0818	-1.04735	-0.49803	-2.81737	-1.77977		7.4	-0.34139	1.51408	1.39201	0.35441	0.92814	0.14689	0.36662	-0.57332	-1.51327	-0.67098	-0.84188	-1.03719	0.17131	-0.30477		7.4	-0.77167
7.45	0.48108	2.06799	0.6947	1.64075	0.60315	0.57263	-2.35705	-3.3031	-4.37121	-4.37121	-4.15759	-2.47912	-1.47204	-0.19031		7.45	-0.49803	0.17336	0.66164	0.17336	-0.00975	1.79079	0.87526	0.0818	0.69215	0.23439	-0.74217	-0.80321	-2.78685	-1.53563		7.45	-0.62225	1.58722	1.18439	0.31769	1.14777	-0.23162	0.18341	-0.5368	-1.31805	-0.74432	-1.17157	-1.2326	-0.3659	-1.00067		7.45	-0.80213
7.5	-0.15989	1.79323	0.54201	2.34255	0.32839	-0.12938	-2.63182	-3.45579	-4.58494	-3.97459	-3.66942	-1.86888	-1.53319	-1.3806		7.5	-0.25389	0.50905	0.90578	0.14284	0.20387	1.45509	0.84474	0.11232	0.32594	0.53957	-0.49803	-0.6201	-2.72581	-1.44408		7.5	-0.74442	1.84347	1.26974	0.63498	0.65939	-0.59793	-0.43924	-0.92752	-1.37918	-0.40262	-1.37918	-0.45145	-0.18289	-0.95194		7.5	-0.98518
7.55	0.3588	2.25089	-0.09896	1.51847	0.63346	-0.19052	-2.44882	-3.82211	-4.61557	-3.94418	-3.02865	-2.02157	-1.16708	-2.08261		7.55	-0.22337	0.78371	0.78371	0.0818	0.44801	1.08888	0.81422	0.38698	0.20387	0.32594	-0.07079	-0.68114	-2.08495	-1.38304		7.55	-1.15955	2.13634	0.68371	1.64806	-0.06092	-1.15955	-0.52479	-0.69569	-1.57459	-0.3783	-1.48914	-0.24403	-0.20741	-1.08631		7.55	-0.83254
7.6	-0.22114	1.64043	-0.03803	1.30474	0.05352	0.41973	-2.17426	-4.55464	-4.52412	-3.456	-2.63203	-2.26582	-1.0146	-1.96064		7.6	-0.16234	0.53957	0.93629	-0.19286	0.78371	0.53957	1.18044	0.35646	0.0818	0.4175	-0.07079	-0.437	-1.62718	-1.74925		7.6	-1.46483	2.16066	0.30519	1.34279	0.07326	-0.84227	-0.53709	-1.04979	-1.57469	0.1465	-1.62352	0.10988	-0.0366	-0.7202		7.6	-1.01559
7.65	0.41963	1.54877	0.66377	0.87739	0.08393	0.78584	-2.14385	-4.46319	-4.28008	-3.18145	-2.08282	-2.02178	-0.40435	-1.62505		7.65	-0.22337	0.05128	1.08888	-0.34544	0.87526	0.47853	1.24147	0.53957	0.26491	0.11232	-0.00975	-0.37596	-1.16942	-1.68822		7.65	-1.22078	2.41691	0.59806	1.08634	-0.14657	-0.98885	0.12199	-0.50057	-1.67244	0.34172	-1.17196	-0.39071	-0.43953	0.10978		7.65	-1.10709
7.7	0.48056	1.39608	1.02987	1.57919	0.32797	1.12142	-1.65568	-4.09708	-4.37174	-2.60172	-2.11344	-2.41861	-0.49601	-0.55704		7.7	0.20387	-0.55907	1.21095	-0.55907	0.90578	0.44801	1.51613	0.32594	0.23439	0.23439	-0.19286	0.05128	-1.23045	-1.68822		7.7	-1.31854	2.09943	0.80549	0.68341	-0.01239	-0.45184	0.24396	-0.30535	-1.85565	0.34162	-1.44061	-0.69598	-0.5495	-0.19549		7.7	-1.22911
7.75	1.36546	0.9077	1.97581	1.97581	1.12132	1.57908	-2.02199	-4.1277	-4.49392	-2.54079	-1.89992	-2.7239	-0.28249	-0.74025		7.75	0.66164	-0.55907	0.75319	-0.74217	0.47853	0.6006	1.36354	0.44801	0.32594	0.14284	-0.40648	0.0818	-1.32201	-1.62718		7.75	-0.58621	1.62326	1.55002	0.51242	-0.22	-0.31766	0.51242	0.51242	-2.11209	0.50021	-1.50174	-0.79373	-0.51297	0.19504		7.75	-0.92388
7.8	1.39587	1.7926	1.64001	1.54846	1.45691	1.33484	-2.57141	-3.70056	-4.89075	-3.30384	-2.14417	-2.57141	-0.67932	-0.49622		7.8	0.99733	-0.37596	0.57008	-1.1389	0.32594	0.72267	1.18044	0.29543	0.14284	0.29543	-0.71165	0.05128	-1.59666	-1.74925		7.8	-0.40321	1.0006	1.70861	0.31701	-0.08582	0.10949	0.26818	0.31701	-1.85584	0.20715	-2.19764	-0.79383	-0.29334	-0.06141		7.8	-0.74072
7.85	1.76198	1.88405	1.54835	0.96852	1.48732	1.48732	-2.69359	-3.85326	-4.46361	-3.73119	-2.541	-2.87669	-1.74754	-0.52684		7.85	0.99733	0.44801	0.38698	-1.01683	0.0818	0.93629	0.81422	0.4175	0.02077	0.17336	-0.86424	-0.1013	-1.77977	-1.71873		7.85	-0.0493	0.69533	2.17238	0.58547	-0.11033	-0.31785	-0.01268	0.07277	-1.9658	0.39015	-1.7949	-0.18358	-0.02489	-0.47655		7.85	-0.43549
7.9	1.33463	2.73843	1.24307	0.29703	0.66324	1.24307	-3.0599	-4.00595	-4.00595	-4.37216	-2.90732	-2.75473	-1.71713	-1.07626		7.9	0.63112	0.93629	0.50905	-0.89476	0.38698	1.14992	0.69215	0.23439	-0.25389	0.20387	-0.58958	-0.22337	-1.87132	-1.71873		7.9	-0.52547	0.52433	1.684	1.40324	0.62199	-0.25692	-0.87948	-0.44002	-1.63631	-0.0616	-1.77059	-0.31795	-0.19588	-0.31795		7.9	-0.3744
7.95	1.09038	1.8228	1.304	0.57158	0.6021	0.54106	-3.2126	-3.54829	-4.34175	-4.58589	-3.02949	-2.96846	-2.05293	-1.16792		7.95	0.53957	1.33302	0.38698	-0.49803	0.53957	1.1194	0.81422	0.50905	-0.34544	0.26491	-0.437	-0.1013	-2.14598	-1.93236		7.95	-0.50116	0.92707	1.62287	1.73273	0.9759	-0.91619	-0.50116	-0.4035	-2.12469	0.35334	-1.68524	-0.08612	0.15802	-0.9284		7.95	-0.34383
8	0.84613	1.97529	1.88373	-0.31353	0.20527	0.20527	-3.09063	-2.90753	-4.37237	-4.21978	-3.2127	-2.90753	-1.992	-1.62579		8	0.23439	1.21095	0.44801	-0.437	0.78371	1.1194	0.96681	0.6006	-0.34544	0.29543	-0.13182	-0.28441	-2.11546	-2.05443		8	-0.59891	1.17111	0.9758	1.81808	1.74484	-0.72098	-0.73319	-0.29373	-1.73416	-0.28153	-1.30692	-0.42801	-0.28153	-0.89188		8	-0.43533
8.05	1.27328	0.87655	1.70052	-0.0695	0.38827	-0.40519	-3.30436	-3.18229	-4.00627	-3.3654	-2.90763	-1.83952	-1.90055	-1.65641		8.05	0.23439	1.02785	0.50905	-0.40648	0.84474	1.05836	1.45509	0.87526	0.05128	0.47853	-0.19286	-0.22337	-1.99339	-2.1765		8.05	-0.04969	1.52502	1.41515	1.41515	1.54943	-0.245	-0.66004	-0.42811	-1.67323	-0.25721	-1.52674	-0.09852	-0.62342	-0.34266		8.05	-0.37424
8.1	1.6699	0.84592	2.31077	-0.19167	-0.03908	0.08299	-3.57912	-3.79275	-3.79275	-2.6636	-2.75515	-1.71755	-2.44997	-1.38186		8.1	-0.04027	0.81422	0.66164	-0.49803	0.84474	1.1194	1.76027	0.72267	0.35646	0.44801	0.05128	-0.37596	-1.56615	-1.77977		8.1	-0.47703	1.50051	1.25636	1.04884	1.79347	0.46291	-1.06297	-0.19627	-1.49022	0.04787	-0.84324	0.29201	-1.06297	0.16994		8.1	-0.37419
8.15	1.76135	0.47961	2.21911	0.14392	0.8153	0.14392	-2.99939	-3.97596	-4.03699	-1.59559	-2.75525	-1.93128	-2.4806	-1.35145		8.15	0.14284	0.78371	0.84474	-0.52855	0.96681	1.08888	2.157	0.6006	0.35646	0.57008	-0.13182	-0.16234	-1.44408	-1.26097		8.15	-0.09871	1.21965	2.13517	0.7924	1.47599	0.31633	-0.74569	-0.64803	-1.22176	0.0966	-1.08748	0.14543	-1.00203	1.08537		8.15	-0.28258
8.2	2.00538	1.02882	2.58522	0.75416	0.90675	0.72364	-2.63329	-4.06762	-3.79296	-1.65673	-2.41967	-2.26708	-2.41967	-1.04637		8.2	0.11232	0.84474	0.87526	-0.40648	0.84474	1.33302	1.76027	0.32594	0.26491	0.4175	-0.00975	-0.40648	-1.1389	-0.55907		8.2	-0.29412	0.93879	1.96418	0.56037	1.80549	-0.13543	-0.55047	-0.45281	-1.33172	0.16974	-0.92889	0.51154	-0.58709	0.81672		8.2	-0.37408
8.25	2.40201	1.57803	1.88321	0.57095	1.21182	0.4794	-1.90097	-3.57944	-3.88461	-2.17563	-2.17563	-2.54184	-2.32822	-1.04648		8.25	0.23439	0.84474	1.1194	-0.52855	0.93629	1.36354	1.48561	0.35646	0.0818	0.63112	-0.13182	-0.46751	-1.1389	-0.28441		8.25	-0.13553	1.43918	1.98849	0.47482	1.36593	-0.13553	-0.47733	-0.99002	-1.06326	-0.26981	-1.23416	-0.0867	-0.5994	0.46261		8.25	-0.19092
8.3	2.73759	2.43242	1.85258	1.02861	0.96757	0.81499	-1.62642	-2.51143	-3.70161	-1.9316	-2.23677	-2.41988	-2.02315	-1.35176		8.3	0.32594	0.90578	1.08888	-0.34544	0.75319	1.36354	1.05836	0.23439	0.23439	0.44801	-0.1013	-0.46751	-1.01683	-0.19286		8.3	-0.62391	0.96301	1.52453	0.2672	1.1217	-0.67274	-0.13563	-0.59949	-1.40516	0.16955	-1.41737	-0.06239	-0.2699	-0.46522		8.3	-0.43501
8.35	2.43231	2.70697	1.66937	0.57074	0.72333	0.54022	-1.56549	-2.32843	-3.85431	-1.96222	-2.87775	-2.14532	-2.05377	-1.13824		8.35	0.47853	0.63112	1.14992	-0.49803	0.93629	1.21095	0.90578	0.4175	0.29543	0.32594	0.02077	-0.16234	-1.16942	-0.40648		8.35	-0.42869	1.08498	1.21926	0.80422	1.02394	-0.52635	-0.6118	-0.48973	-1.11229	-0.20897	-1.31981	-0.75828	-0.29442	-1.22215		8.35	-0.43496
8.4	1.45565	2.88997	2.03548	1.57772	0.84529	0.02132	-1.07731	-3.09147	-4.28166	-1.71818	-3.09147	-1.9318	-2.02336	-0.95524		8.4	0.6006	0.75319	0.96681	-0.52855	0.78371	1.14992	0.72267	0.4175	0.72267	0.11232	0.17336	0.32594	-1.26097	-0.89476		8.4	-0.28231	1.07267	1.35344	1.10929	0.84074	-0.64852	-0.22127	-0.57528	-1.01473	-0.29451	-1.42977	-0.6241	0.20598	-0.85604		8.4	-0.83163
8.45	1.39451	2.67624	1.79123	1.9133	0.08225	0.5095	-1.29104	-3.45779	-4.67849	-1.99294	-3.33572	-1.7488	-1.77932	-1.07742		8.45	0.26491	0.96681	0.99733	-0.74217	0.66164	1.36354	0.50905	0.47853	0.69215	-0.07079	0.29543	0.35646	-1.26097	-1.01683		8.45	-0.47772	1.2923	1.24347	1.47541	1.40217	-0.0993	-0.56317	-0.23358	-0.80731	-0.6242	-0.85614	-0.63641	-0.13592	-0.48992		8.45	-0.8621
8.5	1.18078	2.67614	1.94372	2.49303	0.50939	0.84508	-1.29115	-3.48841	-4.70912	-2.20667	-3.21375	-1.56581	-2.0846	-0.8639		8.5	0.05128	1.30251	0.90578	-0.6201	0.44801	1.54665	0.75319	0.11232	0.6006	-0.25389	0.11232	0.50905	-1.41356	-1.16942		8.5	-0.67313	1.26779	1.634	1.23117	1.2922	-0.16043	-0.69754	-0.39237	-0.94168	-0.52664	-1.33231	-0.34354	0.12033	0.09592		8.5	-1.10618
8.55	1.54688	2.18775	1.76051	1.97413	0.41773	1.54688	-1.7185	-2.90868	-4.43456	-2.60351	-2.54247	-1.87109	-2.26781	-1.01659		8.55	-0.22337	1.21095	0.93629	-0.6201	0.32594	1.76027	0.90578	-0.16234	0.35646	-0.58958	0.23439	0.26491	-1.29149	-0.98631		8.55	-1.10047	0.5841	1.38976	0.73058	1.59728	-0.19715	-0.81971	-0.25819	-1.66199	-0.39246	-0.89295	-0.70985	-0.47791	-0.29481		8.55	-1.10613
8.6	1.48574	2.58438	1.85195	1.51626	0.7228	0.7228	-0.98618	-2.84775	-4.52622	-2.20688	-2.17637	-1.32187	-2.35947	-0.86411		8.6	0.14284	0.84474	0.93629	-0.6201	0.4175	1.66872	1.33302	-0.49803	0.17336	-0.58958	0.14284	0.26491	-1.19994	-1.04735		8.6	-0.67332	0.53517	1.85353	0.82814	0.79152	0.12014	-0.92967	-0.95408	-1.62547	-0.2949	-1.12498	-0.95408	-0.4658	-0.03856		8.6	-1.35022
8.65	1.88237	2.03495	2.06547	1.63823	0.66166	0.78373	-0.68111	-3.6108	-3.6108	-1.96285	-2.26802	-0.77266	-2.81734	-1.0168		8.65	0.47853	0.53957	0.66164	-0.49803	0.38698	1.54665	1.21095	-0.46751	0.20387	-0.58958	0.35646	0.02077	-1.01683	-0.9558		8.65	-0.51473	0.59611	1.93888	0.51066	1.01115	-0.17293	-0.95418	-0.75887	-1.94295	0.27873	-0.40486	-0.84432	-0.78328	-0.47811		8.65	-1.31965
8.7	1.6076	2.52313	2.49261	1.82123	0.47845	-0.1319	-0.315	-4.00763	-3.33624	-2.14606	-2.23761	-0.58966	-2.42072	-1.62726		8.7	0.75319	0.38698	0.53957	-0.68114	0.84474	1.14992	1.08888	-0.437	0.14284	-0.13182	0.38698	-0.19286	-1.10838	-0.83372		8.7	-0.34393	1.42609	1.75568	1.19416	1.29181	0.43732	-1.21063	-1.06414	-1.66229	0.01008	-0.72235	-0.24627	-0.40496	-0.53924		8.7	-1.28907
8.75	1.57698	2.27888	2.73665	2.43147	0.3868	-0.25407	-0.52873	-4.58757	-3.33635	-2.05461	-2.32927	-0.19304	-1.87151	-1.38323		8.75	0.72267	0.69215	0.32594	-0.80321	0.96681	0.75319	0.78371	-0.28441	0.35646	-0.04027	0.11232	-0.34544	-1.19994	-0.80321		8.75	-0.68582	1.35275	1.91428	1.18185	1.67013	0.05881	-0.69803	-0.85672	-1.80887	-0.17313	-0.56375	0.42502	-0.78348	-0.79569		8.75	-1.38057
8.8	1.30222	2.85861	2.00412	1.82102	-0.25418	-0.13211	-1.26126	-4.12991	-3.0618	-2.45145	-2.87869	-0.65091	-1.41385	-1.10867		8.8	0.38698	0.72267	0.57008	-1.19994	1.30251	0.38698	0.47853	-0.04027	0.6006	0.02077	-0.1013	-0.52855	-1.19994	-0.6201		8.8	-0.94227	1.02306	1.90197	1.21838	2.28039	0.36389	-0.62488	-0.72254	-1.35731	-1.02772	-0.71033	0.41271	-0.49061	-0.49061		8.8	-1.53311
8.85	1.69884	2.00402	1.51573	1.94298	-0.16273	0.20348	-1.23085	-4.37416	-3.30604	-2.97035	-3.24501	-1.38343	-1.26136	-1.10878		8.85	0.35646	0.69215	0.75319	-1.38304	1.14992	0.20387	0.44801	-0.07079	1.02785	0.02077	-0.37596	-0.34544	-1.10838	-0.77269		8.85	-0.27098	0.81545	2.6465	1.03517	1.88967	0.19289	-0.10008	0.02199	-1.44285	-0.69822	-0.34422	0.00978	-0.71043	-0.62498		8.85	-1.56357
8.9	1.21045	2.03443	1.39356	1.51563	-0.77319	0.9358	-1.99389	-3.70288	-3.70288	-3.33666	-3.55029	-1.38354	-1.04785	-1.47509		8.9	-0.07079	0.47853	0.99733	-1.44408	0.84474	0.53957	0.17336	-0.00975	1.1194	0.02077	-0.19286	-0.49803	-0.92528	-0.68114		8.9	-0.53963	0.53459	2.30461	0.80314	1.77971	0.42472	-0.28328	0.26603	-1.04012	-0.71053	-0.56404	-0.46639	-0.4908	-0.57625		8.9	-1.10575
8.95	1.21035	1.3019	1.69863	1.79018	-0.46812	0.35586	-1.38365	-3.82505	-3.70298	-3.7335	-3.03159	-1.1395	-1.07847	-1.90244		8.95	-0.00975	0.4175	1.02785	-1.44408	0.63112	0.75319	0.26491	-0.04027	1.05836	0.23439	-0.04027	-0.28441	-1.23045	-0.92528		8.95	-0.25897	0.79084	2.49982	0.70539	0.70539	0.25373	0.09504	0.07062	-1.25994	-0.40545	-0.22235	-0.88153	-0.64959	-0.00262		8.95	-0.80053
9	0.75248	1.75956	1.97318	1.05766	-0.34615	0.53886	-1.68893	-3.64205	-3.27584	-4.67965	-2.87911	-1.2922	-1.17013	-2.29928		9	-0.00975	0.47853	0.72267	-1.07787	0.4175	1.21095	0.26491	0.0818	1.02785	0.0818	0.38698	-0.31493	-1.44408	-0.9558		9	-0.51541	0.83957	2.15793	0.38791	0.82736	-0.42996	-0.24686	-0.17361	-0.69852	-1.13797	-0.19803	-0.80838	-0.25906	-0.03934		9	-0.52581
9.05	1.30169	1.57635	1.91204	0.81341	0.11151	-0.31574	-0.86506	-3.8863	-2.26887	-4.98493	-3.52009	-0.71247	-1.47541	-1.90265		9.05	0.0818	0.35646	0.57008	-0.86424	0.53957	1.39406	0.47853	0.0818	0.84474	0.20387	0.47853	-0.22337	-1.68822	-0.9558		9.05	-0.08826	1.44982	2.59728	0.87609	0.96154	-0.6742	-0.40565	-0.69861	-0.60096	-0.79627	0.10705	-0.47889	-0.47889	0.04601		9.05	-0.70887
9.1	1.30159	2.09504	2.00349	0.47761	0.32502	-0.46843	-0.89568	-3.3676	-2.39104	-4.89348	-3.27605	-1.01775	-1.81121	-1.6281		9.1	0.20387	0.53957	0.26491	-0.52855	0.35646	1.18044	0.63112	0.32594	0.78371	0.05128	0.26491	-0.13182	-1.90184	-1.04735		9.1	-0.12498	0.97365	2.56057	0.50978	1.98684	-1.13816	-0.83299	-0.38133	-0.54002	-0.73533	-0.47899	0.20461	-0.18602	-0.34471		9.1	-0.40364
9.15	1.57614	1.91183	1.48459	0.96579	0.63009	-0.04129	-0.83475	-3.64237	-2.63529	-5.87015	-3.97806	-1.56717	-1.75028	-1.23148		9.15	0.23439	0.23439	0.32594	-0.34544	0.50905	0.96681	0.63112	-0.00975	0.4175	-0.1013	0.20387	-0.34544	-1.6577	-0.80321		9.15	-0.28377	1.2299	2.37736	0.94914	1.80363	-1.21151	-0.57674	-0.22274	-1.05281	0.30217	-0.74764	0.14348	-0.43025	0.07023		9.15	-0.4341
9.2	1.08775	1.88121	1.54552	1.27086	0.56895	-0.07192	-0.65175	-3.61195	-3.70351	-6.11439	-4.13075	-2.08607	-1.81142	-0.89589		9.2	0.47853	0.17336	0.35646	-0.25389	0.63112	0.75319	0.75319	-0.1013	0.29543	-0.19286	0.05128	-0.31493	-1.53563	-0.52855		9.2	-1.01629	0.99787	1.97443	1.02228	1.65705	-0.99188	-0.73553	0.03351	-0.89422	0.37531	-1.37029	0.43635	0.02131	-0.45477		9.2	-0.5256
9.25	1.30127	1.82007	1.02661	2.06421	0.17212	0.1416	-1.14014	-3.73413	-3.48999	-5.71777	-3.94775	-2.48291	-2.26929	-1.75049		9.25	0.4175	0.11232	0.35646	-0.34544	0.69215	0.78371	0.69215	-0.19286	0.14284	-0.19286	0.35646	-0.37596	-1.26097	-0.16234		9.25	-1.18729	1.53488	1.49826	1.29074	1.16867	-0.13748	-0.63797	-0.62576	-0.90652	0.55832	-0.8699	0.10666	-0.29617	-0.66238		9.25	-0.86124
9.3	1.39272	1.60634	1.45375	2.09462	0.56874	-0.16368	-0.43834	-3.58165	-3.49009	-5.80943	-3.79527	-2.94078	-2.23887	-1.62852		9.3	0.11232	0.05128	0.44801	-0.52855	0.72267	0.66164	0.93629	-0.07079	-0.00975	0.11232	0.50905	-0.28441	-1.01683	0.02077		9.3	-0.93104	1.66906	1.0465	0.77795	1.49816	0.28967	-1.13856	-0.89441	-0.54041	0.05773	-0.82117	0.00891	-0.03992	-1.62684		9.3	-0.8917
9.35	1.48417	1.51468	0.96537	2.21659	0.41605	0.41605	-1.20138	-3.4902	-3.00192	-5.68746	-3.42916	-3.09347	-2.60519	-1.26242		9.35	-0.437	0.0818	0.4175	-0.55907	0.47853	0.57008	1.05836	-0.07079	-0.04027	0.17336	0.63112	-0.1013	-0.77269	0.02077		9.35	-0.57713	2.2549	0.8633	0.96096	1.14406	0.53371	-0.65037	-1.28514	-0.78465	-0.07664	0.04543	-0.72361	-0.32078	-1.67576		9.35	-0.9832
9.4	1.48406	1.33147	1.75872	1.88079	-0.04182	-0.19441	-0.56062	-3.58186	-3.55134	-6.32844	-3.4903	-3.58186	-2.7884	-0.74372		9.4	-0.55907	-0.13182	0.78371	-0.83372	0.4175	0.44801	1.18044	0.02077	-0.1013	0.23439	0.47853	-0.13182	-0.46751	0.14284		9.4	-0.44295	2.05949	1.27824	0.37492	1.16838	0.44816	-0.3575	-1.24861	-0.51619	-0.27205	-0.1866	0.06975	-0.05232	-2.12752		9.4	-0.98315
9.45	1.54499	1.3924	1.66706	1.75861	-0.43865	0.29377	-0.83538	-2.63592	-2.91058	-6.29803	-3.36834	-4.28387	-2.45281	-0.31658		9.45	-0.04027	0.0818	1.02785	-1.01683	0.17336	0.11232	1.36354	0.14284	0.0818	0.0818	0.0818	-0.1013	-0.52855	0.05128		9.45	0.06965	2.84064	1.77863	0.20393	1.14387	0.1551	0.27717	-1.28533	-0.46746	-0.02801	-0.15008	-0.06463	-0.22332	-1.52947		9.45	-0.6474
9.5	1.5754	1.54489	2.55197	1.36178	0.14108	0.14108	-0.77445	-2.75809	-3.39896	-5.87089	-3.33793	-4.10087	-1.7205	-0.59135		9.5	0.35646	0.4175	1.05836	-1.07787	0.14284	0.14284	1.24147	0.29543	0.05128	0.05128	0.02077	-0.19286	-0.55907	0.17336		9.5	0.42355	2.63303	2.04709	-0.5408	1.93723	0.14279	0.22824	-1.16336	0.39914	-0.23563	-0.28445	-0.24783	0.30148	-1.43191		9.5	-0.49476
9.55	1.45323	1.94151	2.0941	1.0565	0.07994	0.38511	-0.95766	-1.99526	-2.60561	-5.59633	-3.67373	-4.07045	-1.65957	-1.26284		9.55	0.75319	0.72267	1.1194	-1.04735	0.32594	-0.07079	1.30251	0.38698	-0.22337	0.38698	0.05128	0.02077	-0.83372	0.32594		9.55	0.69201	2.77941	2.03478	-0.28455	1.93713	0.24035	0.33801	-0.90711	0.46008	-0.26014	-0.0282	-0.60193	0.11828	-0.49207		9.55	-0.34212
9.6	2.15503	1.88037	2.49072	0.69018	-0.10327	-0.37793	-1.47656	-1.93433	-3.49072	-5.13867	-3.58228	-3.94849	-1.65967	-1.32398		9.6	0.75319	0.93629	0.81422	-0.86424	0.50905	0.0818	1.27199	0.20387	-0.31493	0.29543	0.20387	0.20387	-0.9558	0.14284		9.6	0.58205	1.92482	1.59523	-0.07713	2.03469	0.28908	-0.40672	-0.76072	0.8384	-0.35789	-0.23582	-0.22361	0.04494	-0.58982		9.6	-0.55569
9.65	1.75819	2.58217	2.4601	0.84267	-0.62218	-0.40855	-1.14098	-1.90392	-3.58238	-4.92516	-3.82652	-4.04015	-2.30064	-1.14098		9.65	0.44801	0.72267	0.78371	-0.77269	0.93629	0.35646	1.21095	0.4175	-0.437	0.44801	0.38698	-0.04027	-0.89476	-0.04027		9.65	0.74064	2.0468	1.60734	0.92375	1.33879	-0.1993	-0.18709	-0.46785	-0.07723	-0.57771	-0.29695	-0.11385	-0.0284	-0.40682		9.65	-0.52512
9.7	1.94119	2.33792	2.70413	1.51395	-0.56125	-0.31711	-1.65988	-1.59885	-3.55197	-4.40646	-3.49093	-4.00973	-2.54489	-1.26315		9.7	0.20387	0.75319	0.50905	-0.6201	1.18044	0.69215	1.18044	0.57008	-0.19286	0.23439	0.20387	-0.16234	-0.98631	-0.34544		9.7	0.76496	1.36311	1.33869	1.25324	1.32648	-0.17498	-0.28484	-0.79754	-0.37029	-0.59002	-0.16277	0.00812	0.20344	-0.78533		9.7	-0.61662
9.75	1.05608	2.27678	2.15471	1.36125	-0.16462	0.29314	-1.01912	-2.11775	-3.64363	-4.31502	-3.2469	-4.07087	-1.78206	-1.01912		9.75	-0.25389	0.44801	0.35646	-0.22337	1.24147	1.05836	0.96681	0.93629	-0.25389	0.05128	0.20387	-0.37596	-0.71165	-0.52855		9.75	0.64279	1.24094	1.46066	1.77805	0.63059	-0.02859	0.09348	-0.49246	-1.22488	-0.69998	-0.40701	-0.11404	0.33762	-0.99295		9.75	-0.43346
9.8	1.2696	1.81891	2.18512	1.51374	-0.2868	0.44562	-1.66009	-1.87371	-3.79632	-4.2846	-2.63665	-3.82684	-1.23284	-1.38543		9.8	-0.25389	0.14284	0.29543	-0.28441	1.27199	0.93629	0.81422	0.81422	-0.58958	-0.1013	0.17336	-0.37596	-0.68114	-0.80321		9.8	0.484	0.91125	1.22863	1.08215	1.13098	0.14221	-0.16297	-0.9076	-1.06629	-0.27283	-0.02869	-0.32166	-0.27283	-1.37146		9.8	-0.46392
9.85	1.23897	2.30709	2.09347	1.17794	-0.22587	1.08639	-0.92777	-2.27055	-4.49833	-4.37626	-2.48417	-2.72831	-1.26347	-1.75175		9.85	-0.22337	-0.04027	-0.07079	-0.31493	1.05836	1.1194	0.53957	0.78371	-0.74217	-0.437	0.23439	-0.25389	-0.6201	-1.29149		9.85	0.41066	1.65578	1.6924	0.93557	1.36281	0.1299	-0.18748	-1.0908	-1.17625	-0.12644	-0.32176	-0.5781	-0.30955	-1.56687		9.85	-0.79956
9.9	1.69663	2.82578	1.91026	1.91026	-0.28701	0.87266	-1.32461	-1.99599	-4.19326	-3.82705	-2.97256	-2.75893	-1.81289	-1.62978		9.9	-0.25389	-0.25389	-0.1013	-0.77269	0.84474	1.1194	0.29543	0.69215	-1.10838	-0.46751	0.4175	-0.25389	-0.83372	-1.44408		9.9	0.00773	1.851	1.37492	1.09416	1.91203	0.56926	-0.62703	-1.48152	-0.68807	0.33733	-0.37068	-0.95662	-0.67586	-1.40828		9.9	-1.07417
9.95	1.87963	3.06982	1.87963	1.72704	0.0791	1.45239	-0.50074	-2.24024	-4.37647	-3.27784	-3.64405	-2.85059	-2.11817	-1.01954		9.95	0.05128	0.05128	-0.25389	-1.01683	0.6006	1.1194	0.26491	0.47853	-1.04735	-0.58958	0.32594	-0.16234	-1.44408	-1.68822		9.95	-0.16326	2.08283	1.53352	1.63117	1.42365	0.48371	-0.45623	-0.88348	-0.73699	0.38605	-1.23748	-0.93231	-0.17547	-1.45721		9.95	-1.37929
10	1.4828	2.67298	2.1847	2.33729	-0.47033	1.08607	-0.83654	-2.42345	-3.46105	-2.82018	-4.0714	-3.12536	-2.39293	-0.98912		10	0.11232	0.29543	-0.07079	-0.89476	0.14284	1.18044	-0.1013	0.14284	-1.04735	-0.40648	0.4175	-0.34544	-1.68822	-1.6577		10	-0.02908	1.57004	1.36252	1.04514	1.42355	0.30051	-0.00467	-0.7615	-0.9324	0.6423	-1.37186	-0.52957	-0.38309	-1.23758		10	-1.22665
10.05	1.81839	2.24563	2.7034	1.33011	0.13992	0.84182	-0.37888	-2.6677	-3.64426	-1.90476	-4.62082	-3.1865	-1.93527	-1.8132		10.05	0.26491	0.53957	0.14284	-0.83372	0.17336	1.02785	-0.16234	-0.28441	-1.07787	0.14284	0.29543	-0.37596	-1.8408	-1.35252		10.05	0.63	1.58215	1.54553	1.02063	1.19152	-0.50525	0.75207	-0.62732	-0.96912	0.38586	-1.93348	-0.09021	-0.05359	-0.79822		10.05	-1.13504
10.1	1.42155	2.52019	2.09294	1.26897	0.50603	0.32292	-0.50105	-2.78987	-4.25472	-2.33211	-4.01057	-2.85091	-1.66072	-2.05745		10.1	0.35646	0.66164	0.0818	-0.40648	0.17336	1.33302	-0.07079	-0.28441	-0.83372	0.72267	0.14284	-0.16234	-1.68822	-1.1389		10.1	0.38576	1.06936	0.9717	0.67873	1.53322	-0.77391	0.77639	-0.79832	-1.16453	0.71535	-1.77488	0.03176	-0.39549	-0.27342		10.1	-1.01292
10.15	2.00128	2.24542	1.81818	1.11627	1.11627	1.02472	0.13971	-2.82049	-4.56	-2.39325	-3.73602	-3.27826	-1.7829	-2.08807		10.15	0.23439	0.50905	0.26491	-0.28441	0.35646	1.48561	-0.13182	-0.19286	-0.58958	1.18044	0.23439	-0.13182	-1.32201	-0.83372		10.15	0.30022	0.69084	1.05705	0.7885	1.42326	-1.15242	0.66643	-0.16365	-1.2867	0.34904	-1.79939	0.6176	-0.11482	-0.09041		10.15	-0.95183
10.2	1.57393	2.48946	1.42134	1.57393	0.17012	0.81099	-0.13505	-2.91215	-5.68925	-2.91215	-2.66801	-3.30888	-1.87455	-1.17265		10.2	0.4175	0.57008	0.38698	-0.46751	0.47853	1.33302	0.02077	0.23439	-0.13182	1.24147	0.11232	0.20387	-1.1389	-0.77269		10.2	-0.40789	0.7884	1.04475	0.98371	1.54524	-0.4323	0.37336	-0.23699	-1.62859	0.21467	-1.39666	0.60529	0.1048	-0.44451		10.2	-0.98229
10.25	2.45884	1.57383	1.3602	2.15366	0.20054	1.20762	-0.25723	-2.42398	-4.98745	-2.36294	-2.6376	-3.82779	-2.42398	-0.5624		10.25	0.44801	0.63112	0.44801	-0.6201	0.38698	1.27199	-0.13182	0.4175	0.0818	1.05836	0.32594	0.14284	-0.98631	-0.68114		10.25	-0.4324	0.94699	1.81369	1.52072	1.25217	-0.22488	0.34885	-0.18826	-1.34793	-0.13943	-0.79861	0.94699	-0.11502	-0.89627		10.25	-0.70758
10.3	2.48925	1.42113	0.90233	2.55028	0.29198	0.93285	-1.05079	-2.24098	-5.01808	-2.48512	-2.66822	-3.21754	-2.54615	-0.80665		10.3	0.53957	0.66164	0.66164	-0.77269	0.63112	1.14992	-0.07079	0.32594	-0.19286	1.05836	0.63112	-0.22337	-0.89476	-0.58958		10.3	-0.62781	0.99572	1.76477	1.63049	0.97131	0.4342	0.58068	-0.31043	-1.28699	-0.01746	-0.73767	0.56848	-0.42029	-1.11609		10.3	-0.61597
10.35	2.12293	1.5431	1.14637	2.88587	1.05482	0.71912	-1.0509	-2.21056	-3.82799	-3.00402	-2.39367	-2.39367	-2.18005	-1.87487		10.35	0.53957	0.72267	0.66164	-0.68114	0.69215	1.18044	0.02077	0.26491	-0.40648	0.87526	0.87526	-0.40648	-1.1389	-0.34544		10.35	0.01906	1.05666	1.80129	1.21535	1.02004	0.251	0.15334	-0.00535	-0.67674	-0.13963	-0.71336	0.29983	-0.40818	-1.01853		10.35	-0.46333
10.4	1.81765	2.51956	1.60403	2.48904	0.99368	0.10867	-1.5698	-3.00412	-4.16379	-3.15671	-2.72947	-1.63083	-1.81394	-2.51584		10.4	0.35646	0.63112	0.53957	-0.71165	0.72267	1.1194	-0.04027	-0.07079	-0.49803	0.69215	0.93629	-0.55907	-1.16942	-0.07079		10.4	0.32414	1.33733	1.61809	0.56828	1.04436	0.45842	-0.16414	0.08	-0.60359	-0.38387	-1.23836	0.17766	0.39738	-0.99422		10.4	-0.55483
10.45	1.08512	2.88566	2.70256	2.36686	1.08512	0.32219	-1.3868	-2.97371	-3.61458	-3.15682	-2.48543	-1.02059	-1.69197	-2.76009		10.45	0.29543	0.4175	0.38698	-0.86424	0.75319	0.99733	-0.07079	-0.16234	-0.25389	0.87526	0.50905	-0.40648	-1.1389	0.0818		10.45	0.73908	1.59358	1.8133	0.45832	1.2884	0.33625	-0.2741	-0.17644	-0.42058	-0.37176	-0.89666	0.40949	0.28742	-0.77459		10.45	-0.64633
10.5	0.99347	2.33624	3.25177	1.72589	0.77984	0.3526	-2.27191	-3.12641	-4.01142	-2.08881	-3.18744	-0.62397	-1.81415	-2.69916		10.5	0.26491	0.29543	-0.1013	-0.74217	0.72267	1.1194	-0.22337	-0.28441	0.17336	0.84474	0.11232	-0.31493	-0.98631	-0.16234		10.5	0.78781	2.09397	1.87424	1.20285	1.30051	0.47043	0.0676	-0.20096	-1.10428	-0.54275	-0.76248	0.44602	0.84885	-0.84793		10.5	-0.46317
10.55	0.23042	2.45821	3.28218	1.96992	0.77974	0.62715	-1.93633	-2.82134	-4.22514	-2.0584	-2.7603	-0.83769	-2.63823	-1.7227		10.55	0.26491	0.20387	-0.34544	-0.68114	0.81422	1.33302	-0.58958	-0.16234	0.38698	0.99733	0.02077	-0.437	-0.65062	-0.34544		10.55	0.72668	1.67883	1.48352	1.34924	1.54455	0.56799	-0.14002	-0.92127	-1.28748	-0.07898	-0.29871	0.05529	0.50695	-0.94568		10.55	-0.52415
10.6	0.68808	2.12241	3.09897	1.87827	0.23032	0.23032	-2.39419	-3.03506	-4.10318	-1.78384	-3.21817	-1.05142	-2.63833	-1.47867		10.6	0.63112	0.50905	-0.40648	-0.68114	0.96681	1.14992	-0.9558	0.0818	0.6006	0.90578	0.14284	-0.49803	-0.58958	-0.6201		10.6	0.50686	1.87404	1.34914	1.8008	0.9219	0.38479	0.14065	-1.18992	-1.14109	-0.44529	-0.76267	0.2383	0.15285	-0.6406		10.6	-0.37151
10.65	0.81005	2.6411	2.91576	1.81713	0.44384	0.50487	-1.90602	-2.48585	-3.88966	-1.90602	-3.58448	-1.60084	-2.82154	-1.53981		10.65	0.75319	0.57008	-0.34544	-0.37596	0.93629	1.14992	-1.47459	0.20387	0.6006	0.53957	0.53957	-0.437	-0.40648	-0.80321		10.65	0.33586	1.2758	1.45891	1.49553	1.06828	0.58	-0.37215	-1.42195	-1.05574	-0.14021	-0.88484	0.15276	-0.54304	-0.49422		10.65	-0.27991
10.7	1.20667	2.33582	3.12928	1.05408	0.84046	0.23011	-2.54699	-2.94372	-3.52356	-2.36389	-3.2489	-1.44836	-2.18078	-1.14318		10.7	0.69215	0.4175	0.02077	-0.37596	0.90578	1.02785	-1.77977	0.4175	0.20387	0.35646	0.75319	-0.52855	-0.52855	-0.74217		10.7	0.27473	1.2757	2.16682	1.9593	0.99494	0.36018	-0.2868	-0.84832	-0.89715	0.00617	-0.87273	-0.01824	-0.57976	0.17707		10.7	-0.61555
10.75	1.63381	2.18313	2.39675	1.11501	0.93191	1.08449	-2.57761	-3.09641	-3.37107	-2.42503	-3.52366	-1.93675	-2.24192	-0.9907		10.75	0.69215	0.4175	0.02077	-0.71165	0.66164	1.30251	-1.41356	0.20387	0.14284	-0.19286	0.72267	-0.46751	-0.98631	-0.83372		10.75	-0.26248	1.12912	1.58078	1.47092	1.38547	0.83615	-0.16482	-0.93387	-1.00711	0.7385	-0.97049	-0.6531	0.10373	-0.39676		10.75	-0.73756
10.8	1.51163	2.24406	1.78629	1.48112	0.7487	1.17594	-3.03548	-3.31014	-3.27962	-2.76083	-2.8829	-1.26546	-2.05892	-0.34994		10.8	0.47853	0.20387	0.17336	-0.98631	0.44801	1.66872	-0.98631	0.26491	0.05128	-0.37596	0.72267	-0.40648	-1.26097	-0.77269		10.8	-0.14051	1.65393	1.76379	1.33654	1.00695	0.33557	-0.18933	-0.81189	-0.67762	0.50647	-0.84851	-0.44568	0.31115	-0.53113		10.8	-0.85958
10.85	1.87774	1.60308	1.26739	1.45049	0.53497	1.08428	-2.15058	-2.94404	-3.79853	-2.51679	-3.64594	-1.54023	-2.39472	-0.65522		10.85	0.57008	0.20387	0.20387	-1.35252	0.66164	1.51613	-0.34544	0.26491	0.11232	-0.34544	0.4175	-0.31493	-1.32201	-0.77269		10.85	-0.39695	1.97121	1.54397	1.32424	0.70168	0.33547	-0.50681	-0.97068	-0.55564	-0.00633	-1.03172	-0.59226	0.45754	-1.06834		10.85	-0.9816
10.9	1.2978	1.38935	1.8166	1.48091	0.68745	0.29072	-1.93706	-3.06621	-3.89019	-2.91362	-3.55449	-0.92998	-2.21172	-1.02153		10.9	0.63112	0.26491	0.11232	-1.23045	0.63112	1.36354	0.32594	0.35646	0.44801	-0.22337	0.05128	-0.04027	-1.44408	-0.9558		10.9	-0.12849	1.9467	1.88567	1.54387	0.54289	-0.03084	-1.10506	-1.26375	-0.21394	-0.15291	-0.64119	-0.53133	-0.55574	-0.78767		10.9	-1.16465
10.95	1.08407	1.32821	2.15219	1.20614	0.35165	0.32113	-1.4794	-2.30338	-3.82926	-2.60855	-3.5546	-0.65543	-2.45596	-1.44888		10.95	0.53957	0.26491	0.11232	-0.9558	0.47853	1.1194	0.50905	0.69215	0.69215	-0.00975	-0.22337	-0.04027	-1.29149	-1.01683		10.95	-0.18963	1.37287	1.87336	1.77571	0.97004	0.32307	-1.1906	-1.58123	-0.97088	-0.6657	-0.86101	-0.34832	-0.70232	-1.22723		10.95	-1.07304
11	1.11449	1.81639	1.57225	1.35863	0.4431	0.65672	-1.75417	-1.57106	-3.82936	-2.91383	-3.61574	-0.68605	-1.84572	-1.47951		11	0.72267	0.38698	-0.00975	-0.71165	0.29543	0.87526	0.63112	0.6006	0.96681	0.20387	-0.49803	-0.04027	-1.10838	-1.01683		11	-0.07986	0.64035	1.95871	1.71457	1.58029	0.61594	-1.43484	-1.32498	-1.32498	-0.77566	-0.71463	-0.8367	-0.8489	-0.82449		11	-0.9204
11.05	1.51111	2.21301	1.8468	1.11438	-0.01477	0.90076	-1.6322	-1.78479	-3.61584	-2.8529	-2.82239	-0.77771	-1.87634	-1.14392		11.05	0.63112	0.57008	-0.19286	-0.46751	0.14284	0.78371	0.47853	0.63112	0.96681	-0.07079	-0.437	-0.13182	-0.86424	-0.92528		11.05	-0.23865	0.87219	1.67785	2.01965	1.51916	0.62805	-0.64148	-0.82459	-1.06873	-1.38611	-0.69031	-0.72693	-0.60486	-1.28846		11.05	-0.88983
11.1	2.45705	1.81618	2.15187	1.38893	0.38185	1.26686	-1.23558	-1.66282	-4.13475	-3.7075	-2.76146	-0.86937	-1.75438	-1.05247		11.1	0.35646	0.57008	-0.13182	-0.37596	0.38698	0.81422	0.17336	0.47853	0.87526	-0.28441	-0.31493	-0.34544	-0.437	-0.49803		11.1	-0.44627	1.15285	1.45803	1.9219	2.03176	0.50588	-0.62937	-0.82469	-0.89793	-1.09324	-0.77586	-0.64158	-0.88572	-1.00779		11.1	-0.92029
11.15	2.51798	2.39591	2.5485	1.54142	0.53434	1.26676	-1.2662	-1.81552	-4.5621	-3.43295	-1.41879	0.13761	-2.12069	-0.71688		11.15	0.26491	0.69215	0.02077	-0.68114	0.72267	0.99733	0.14284	0.20387	0.96681	-0.28441	-0.19286	-0.49803	-0.34544	-0.07079		11.15	-0.51961	2.17815	1.70207	2.14153	1.83635	-0.06795	-0.34871	-0.04353	-0.83699	-0.89802	-0.70271	-0.1534	-1.23982	-0.78816		11.15	-1.10334
11.2	2.30425	2.57891	2.51787	1.54131	0.62578	1.35821	-1.66303	-1.69355	-4.65376	-4.07392	-1.47993	-0.01508	-2.48701	-1.20527		11.2	0.32594	0.69215	-0.00975	-0.89476	0.63112	1.45509	0.20387	0.0818	0.96681	-0.1013	0.14284	-0.52855	-0.1013	-0.25389		11.2	-0.66619	2.17805	1.50666	1.50666	2.34895	-0.04363	-0.42205	-0.17791	-1.05681	-0.6906	-0.75164	0.09065	-0.31219	-0.45867		11.2	-1.16433
11.25	1.90742	2.36518	2.54829	1.57172	0.25947	0.38154	-2.54815	-2.1209	-4.31817	-3.52471	-1.99883	-0.16778	-2.36504	-1.26641		11.25	0.26491	0.50905	0.23439	-1.29149	0.53957	1.69923	0.26491	-0.04027	0.57008	0.47853	0.35646	-0.52855	-0.07079	-0.55907		11.25	-0.5076	2.25119	1.50656	1.34787	1.99485	-0.26346	-0.00711	-0.03152	-0.83719	-0.48318	-0.27566	-0.06814	0.28586	-0.89822		11.25	-1.22531
11.3	1.17489	1.84628	2.54818	1.38851	0.19833	0.65609	-2.76188	-1.66324	-4.10465	-4.74552	-2.79239	-0.7172	-2.79239	-1.60221		11.3	0.4175	0.53957	0.29543	-1.77977	0.38698	1.54665	0.63112	0.35646	0.38698	0.63112	0.29543	-0.19286	-0.40648	-0.98631		11.3	-0.30017	1.64074	0.88391	0.72522	1.68957	0.45666	0.5299	-0.25135	-1.14246	-0.45886	-0.28797	0.02942	0.55432	-1.15467		11.3	-0.88956
11.35	1.78514	1.35789	2.0598	1.93772	0.65599	0.47288	-3.06716	-1.99904	-4.0132	-4.74562	-4.13527	-1.20559	-2.21267	-1.54128		11.35	0.20387	0.38698	0.32594	-1.90184	0.17336	1.42458	0.66164	0.57008	0.26491	0.44801	0.26491	0.0818	-0.77269	-1.19994		11.35	0.31008	1.34768	1.00588	1.0303	1.23782	0.71291	0.59084	-0.47117	-1.00828	-0.1782	-0.21482	0.32229	0.22463	-1.33787		11.35	-0.82847
11.4	2.09021	1.63244	1.99865	2.15124	0.59485	1.05261	-2.57898	-1.60242	-4.59314	-5.53919	-4.16589	-1.26673	-2.33484	-1.35828		11.4	0.0818	0.23439	0.44801	-1.96288	0.32594	1.33302	0.44801	0.53957	0.0818	0.14284	0.11232	-0.16234	-1.16942	-1.04735		11.4	0.65178	1.48186	0.94475	1.57951	1.0424	1.16447	0.79826	-0.26375	-1.35017	-0.8741	-0.01961	1.04241	0.18791	-1.19148		11.4	-0.85894
11.45	2.21217	1.3882	1.78493	2.73097	0.71681	0.44215	-2.45702	-2.06029	-4.74583	-4.77635	-4.04393	-1.78563	-1.84666	-1.72459		11.45	0.02077	0.38698	0.50905	-1.74925	0.35646	1.51613	0.17336	0.38698	0.26491	-0.22337	-0.16234	-0.37596	-1.93236	-0.80321		11.45	1.13996	1.34748	1.29866	1.90901	1.49397	1.35969	0.07795	-0.38592	-1.3991	-0.89861	0.06574	0.83479	0.43196	-0.73992		11.45	-0.73681
11.5	1.93741	1.93741	1.69327	2.33414	0.07584	0.28946	-2.06039	-2.12143	-4.65439	-4.99008	-2.9454	-1.26694	-1.90781	-1.66367		11.5	-0.22337	0.6006	0.57008	-1.41356	0.35646	1.6382	-0.13182	0.26491	0.35646	-0.22337	-0.07079	-0.65062	-2.42064	-0.58958		11.5	0.95676	1.95774	1.3718	2.66575	1.46946	0.55393	0.34641	0.01682	-1.43582	-1.32595	0.29758	0.76145	0.22434	-0.82547		11.5	-0.88935
11.55	1.14385	2.4561	1.81523	1.69316	0.07573	0.10625	-2.79292	-2.54878	-4.71553	-4.34932	-2.79292	-1.75532	-2.45723	-2.39619		11.55	-0.28441	0.87526	0.63112	-1.10838	0.47853	1.42458	-0.22337	0.44801	0.35646	0.05128	-0.04027	-0.77269	-2.45116	-0.22337		11.55	0.68811	1.81116	1.2008	2.39709	1.72571	0.26086	0.55383	0.16321	-1.47254	-1.00867	-0.16638	0.74914	0.16321	-0.3617		11.55	-1.19447
11.6	1.69306	2.15082	1.96772	1.4184	0.04511	-0.29058	-2.79303	-1.75543	-4.95977	-4.8377	-3.06768	-1.69439	-2.64044	-1.84698		11.6	-0.34544	1.05836	0.6006	-0.77269	0.38698	1.1194	-0.19286	0.63112	0.50905	0.0818	0.02077	-0.68114	-2.23753	-0.07079		11.6	0.50491	1.98196	1.59133	2.12844	1.26174	-0.1909	0.57815	0.62698	-1.44822	-0.70359	-0.25193	0.44387	-0.45945	-0.06882		11.6	-1.25545
11.65	1.50985	2.08968	2.54745	0.99105	0.3807	-0.19914	-3.03727	-1.3588	-4.4716	-4.50211	-3.00675	-2.54899	-2.70158	-1.8776		11.65	-0.58958	0.90578	0.6006	-0.55907	0.38698	0.96681	-0.19286	0.72267	0.63112	-0.00975	0.23439	-0.49803	-1.74925	-0.16234		11.65	0.23625	1.72551	1.11516	1.44475	1.27385	0.28508	0.18742	0.3217	-2.08308	-0.69148	-0.45955	0.48039	-0.32527	0.24846		11.65	-1.37747
11.7	1.57078	1.7844	1.75388	1.75388	0.83836	-0.50442	-2.91531	-1.35891	-4.19704	-4.80739	-3.9529	-2.30495	-1.48098	-0.80959		11.7	-0.77269	0.53957	0.63112	-0.58958	0.6006	0.75319	-0.28441	1.02785	0.69215	0.14284	0.26491	-0.31493	-1.29149	-0.34544		11.7	0.57795	1.73762	1.29817	1.45686	1.28596	0.55354	-0.39861	0.18733	-2.14422	-0.45965	-0.02019	0.52912	-0.26433	0.06526		11.7	-1.40793
11.75	1.90637	1.90637	1.41809	1.69274	0.77722	0.50256	-2.91541	-2.12195	-3.46473	-4.86854	-3.86146	-2.5492	-1.35901	-0.41297		11.75	-0.58958	0.35646	0.38698	-0.80321	0.63112	0.63112	-0.19286	0.93629	0.81422	0.11232	-0.07079	-0.04027	-1.26097	-0.71165		11.75	0.3093	1.7009	1.06614	1.5178	1.61545	1.01731	-0.05691	0.15061	-2.303	-0.52078	0.32151	0.49241	-0.49636	-0.00808		11.75	-1.34684
11.8	1.66212	1.78419	1.66212	2.11988	0.99073	0.68556	-2.42723	-2.51879	-3.64794	-5.38744	-3.80053	-1.78637	-1.08446	-0.38256		11.8	-0.49803	-0.1013	0.29543	-0.89476	0.53957	0.84474	0.05128	0.66164	0.78371	0.26491	-0.22337	0.0818	-1.10838	-1.10838		11.8	0.43127	1.48108	0.9928	1.5177	2.09143	0.96838	-0.0448	-0.39881	-2.3031	0.15051	0.11389	0.00403	-0.34998	-0.53308		11.8	-1.28575
11.85	1.93667	1.69253	2.51651	2.36392	0.38028	1.53995	-1.78647	-2.64096	-3.7396	-5.23496	-3.43442	-2.06113	-1.48129	-0.6268		11.85	-0.07079	-0.37596	0.17336	-1.01683	0.69215	1.05836	0.35646	0.57008	0.6006	0.53957	-0.25389	-0.19286	-1.19994	-1.19994		11.85	0.56545	1.48098	1.00491	1.70071	1.79836	0.60207	0.38235	-0.44773	-2.25437	0.2969	0.54104	-0.50877	-0.43552	-0.9238		11.85	-0.88897
11.9	1.87553	2.15019	3.34038	2.08916	0.38017	1.35673	-1.90865	-2.48848	-4.59419	-5.26558	-3.52608	-2.0002	-1.35933	-1.63399		11.9	0.4175	-0.52855	-0.13182	-0.92528	0.81422	1.39406	0.63112	0.44801	0.66164	0.72267	-0.25389	-0.16234	-1.59666	-1.16942		11.9	0.6508	1.06584	0.89494	1.32219	1.83489	0.90715	0.06487	-0.72859	-2.27888	-0.045	0.85832	-0.26472	-0.31355	-0.65535		11.9	-0.88892
11.95	1.57025	2.08905	2.02802	2.11957	0.16644	0.9599	-2.09186	-2.09186	-4.41119	-4.80792	-3.22101	-2.21393	-1.54254	-0.90167		11.95	0.6006	-0.6201	-0.1013	-0.6201	0.72267	1.39406	0.81422	0.63112	0.53957	0.90578	0.0818	-0.00975	-1.68822	-1.26097		11.95	0.57746	1.70051	1.34651	1.46858	1.6883	0.68733	-0.0573	-0.96062	-1.57097	-0.49676	1.17561	-0.37468	0.06477	-0.53338		11.95	-0.64472
12	1.44808	2.39412	1.29549	1.05135	-0.13884	0.68514	-2.97697	-2.12248	-4.86906	-4.86906	-3.09904	-1.60368	-1.17644	-0.90178		12	0.87526	-0.65062	0.14284	-0.31493	0.84474	0.99733	1.21095	0.6006	0.26491	0.96681	0.11232	0.17336	-1.56615	-0.92528		12	-0.02078	1.71262	1.11448	1.44407	1.60276	0.94358	-0.09402	-0.89968	-2.07156	-0.9241	0.58957	0.21116	0.07688	-0.00857		12	-0.37001
12.05	1.50901	2.33298	0.86814	1.17331	-0.19998	0.31882	-3.43484	-1.87844	-4.50296	-4.68606	-3.8926	-1.60379	-0.96292	-0.10842		12.05	0.93629	-0.37596	0.23439	-0.28441	0.84474	0.72267	1.60768	0.50905	0.20387	0.78371	0.11232	0.26491	-1.47459	-0.55907		12.05	-0.04529	1.66369	1.54162	1.48059	1.65149	0.58948	-0.43591	-0.68006	-2.07166	-0.91199	-0.46033	1.01672	0.27209	-0.11853		12.05	-0.30892
12.1	2.14977	1.93615	0.807	0.92907	-0.29163	0.25768	-3.80116	-2.00062	-4.50306	-4.96082	-3.95374	-1.14613	-1.81751	-0.38319		12.1	0.81422	-0.13182	0.11232	-0.52855	0.81422	0.72267	1.57716	0.69215	0.32594	0.53957	0.17336	-0.04027	-1.19994	-0.46751		12.1	-0.43601	1.8345	1.38284	1.23635	1.63918	0.60159	-0.22849	-0.37498	-1.64451	-1.31492	-0.94871	1.07766	0.39407	0.21096		12.1	-0.15628
12.15	2.36329	2.05811	1.20362	1.08155	0.37965	-0.32226	-3.55712	-1.7871	-4.13695	-4.50317	-4.13695	-1.48193	-2.33642	-0.0476		12.15	0.72267	-0.22337	0.20387	-0.83372	0.90578	0.84474	1.27199	0.63112	0.47853	0.53957	0.05128	-0.52855	-0.83372	-0.40648		12.15	-0.60701	1.96868	1.27287	1.01653	1.73674	0.90666	-0.22859	-0.57039	-1.26619	-1.27839	-1.47371	1.24846	0.52825	0.13762		12.15	-0.58347
12.2	2.05801	2.18008	0.98989	1.32559	0.37954	-0.10874	-3.58774	-2.33652	-4.07603	-4.41172	-3.49619	-1.57358	-2.79429	-0.32236		12.2	0.93629	-0.13182	0.32594	-1.1389	0.84474	0.99733	1.05836	0.69215	0.78371	0.57008	-0.19286	-0.80321	-0.77269	-0.49803		12.2	-1.00994	2.1883	1.50471	1.78547	1.18733	0.72346	0.14973	-0.36296	-0.82683	-0.2531	-1.26629	0.45491	0.7967	-0.36297		12.2	-0.85808
12.25	1.56962	2.02739	1.38652	1.14238	0.28788	-0.56661	-3.55733	-2.24507	-4.47286	-3.86251	-3.86251	-1.69576	-2.00094	-0.16988		12.25	0.93629	-0.1013	0.66164	-1.16942	0.53957	1.33302	0.90578	0.69215	0.84474	0.69215	-0.04027	-0.80321	-0.6201	-0.74217		12.25	-0.96121	1.87082	1.69993	2.05393	1.33371	0.67453	0.45481	-0.26541	-1.35183	0.28391	-0.949	0.34494	0.82102	-0.52175		12.25	-1.31579
12.3	1.14227	2.0578	0.95917	1.7221	0.34881	-0.26154	-3.00812	-2.03156	-4.38141	-3.25226	-3.55744	-1.81793	-1.32965	0.13519		12.3	0.66164	-0.13182	0.90578	-1.19994	0.44801	1.45509	0.75319	0.44801	0.53957	0.66164	0.4175	-0.80321	-0.52855	-0.71165		12.3	-0.03357	1.94397	2.10266	2.07825	1.56555	0.39368	0.28381	-0.55847	-1.48621	0.28381	-0.41199	0.55237	0.94299	-0.52185		12.3	-1.46832
12.35	1.29475	1.78303	0.98958	1.41682	0.31819	0.13509	-2.73357	-2.15373	-4.62566	-3.03874	-3.86272	-1.90959	-0.38371	-0.32268		12.35	0.32594	-0.07079	0.78371	-1.38304	0.47853	1.36354	0.84474	0.38698	0.35646	0.44801	0.53957	-0.68114	-0.65062	-0.65062		12.35	-0.00925	1.67532	1.6509	1.6387	1.71194	0.69875	0.24709	-0.16794	-1.53513	-0.00925	0.35696	0.49123	0.44241	0.14944		12.35	-1.25465
12.4	2.24069	1.72189	1.50827	1.47775	1.05051	0.3486	-2.18436	-2.06228	-4.07644	-3.09988	-2.88626	-1.75711	-0.84158	-0.47537		12.4	0.0818	0.02077	0.47853	-1.38304	0.29543	1.27199	0.93629	0.47853	0.20387	0.20387	0.66164	-0.40648	-1.04735	-0.65062		12.4	0.10051	1.74846	1.56536	1.33342	2.02922	0.9428	-0.21687	0.05168	-1.49861	0.11272	0.55217	0.4179	0.01506	-0.11921		12.4	-1.16304
12.45	2.33214	2.05748	1.81334	1.75231	1.0504	1.14195	-1.97084	-1.97084	-3.89345	-3.61879	-3.28309	-2.06239	-0.65858	-1.23841		12.45	0.05128	-0.07079	0.26491	-1.44408	0.26491	1.02785	0.81422	0.47853	0.11232	0.29543	0.72267	-0.22337	-1.19994	-0.58958		12.45	-0.20476	2.1512	1.60188	1.23567	1.56526	0.74739	-0.4489	0.35676	-1.1447	0.55207	0.55207	0.13703	0.06379	-0.47332		12.45	-0.88833
12.5	2.20997	2.48462	2.33204	1.26392	1.08081	0.86719	-1.42163	-1.63525	-3.2832	-2.82544	-3.19165	-2.33715	-1.60473	-0.62817		12.5	0.38698	-0.07079	0.26491	-1.53563	0.14284	0.87526	0.78371	0.50905	0.38698	0.57008	0.75319	-0.25389	-1.07787	-0.40648		12.5	-0.00955	1.90696	1.51633	0.67405	1.06467	0.63743	-0.22927	0.29563	-1.43777	0.13694	0.4177	0.39329	0.0759	-0.72976		12.5	-0.79672
12.55	1.78261	2.94228	2.39297	0.77553	1.11123	1.17226	-1.57432	-1.78794	-3.68003	-2.12364	-3.83262	-2.73399	-2.21519	-0.99449		12.55	0.87526	-0.07079	0.29543	-1.59666	-0.07079	1.05836	0.72267	0.38698	0.63112	0.72267	0.6006	-0.1013	-0.98631	-0.55907		12.55	0.03918	1.88245	1.15002	0.82043	0.83264	0.28332	-0.19275	-0.29041	-1.03503	-0.31482	0.25891	0.86926	0.63733	-0.76648		12.55	-0.82719
12.6	1.29423	2.72855	1.96561	0.28715	0.40922	0.8975	-2.06271	-1.78805	-3.58858	-0.96407	-3.49703	-2.30685	-3.00875	-0.26217		12.6	0.96681	-0.31493	0.26491	-1.56615	-0.00975	1.27199	0.53957	0.05128	0.57008	0.96681	0.4175	0.0818	-0.65062	-0.86424		12.6	-0.49802	1.58938	0.30764	1.36965	0.74709	0.53958	0.33206	-0.20505	-0.93748	-0.69333	0.08791	1.08889	0.4053	-0.71775		12.6	-0.85765
12.65	1.50775	2.72845	1.93499	0.07342	0.89739	0.65325	-1.63556	-1.75763	-4.32111	-1.60505	-4.16852	-2.61213	-2.7342	-1.02521		12.65	1.08888	-0.19286	0.0818	-1.71873	0.14284	1.05836	0.47853	0.02077	0.38698	1.02785	0.26491	-0.00975	-0.49803	-1.16942		12.65	-0.1075	1.2719	0.56389	2.01653	1.18645	0.64934	0.25872	-0.30281	-1.10847	-0.93757	-0.69343	1.08879	0.0512	-0.87654		12.65	-1.22381
12.7	1.38557	2.88093	1.90437	0.77522	0.86677	0.43953	-1.33049	-1.78826	-4.22966	-1.66619	-3.98552	-1.81877	-2.30706	-0.9948		12.7	1.08888	0.05128	-0.04027	-1.81029	0.26491	0.90578	0.75319	-0.22337	0.6006	0.81422	0.17336	-0.1013	-0.71165	-1.56615		12.7	0.4051	1.65022	1.34504	2.85872	1.23518	0.28303	0.33186	-0.26628	-0.90105	-0.49822	-1.13298	0.88118	0.08772	-0.38836		12.7	-1.19324
12.75	1.29391	2.45358	2.23996	1.41598	1.62961	-0.14041	-0.93387	-1.72733	-4.1077	-2.27664	-3.74149	-2.09354	-1.8494	-1.45267		12.75	0.90578	0.17336	0.26491	-1.74925	0.29543	0.87526	1.08888	-0.437	0.75319	0.69215	0.4175	-0.19286	-0.68114	-1.93236		12.75	0.79563	1.69895	1.62571	3.01731	1.56467	0.25852	0.80784	-0.54714	-1.12087	-0.51052	-1.1697	0.85666	-0.14431	-0.53494		12.75	-1.07111
12.8	1.32432	2.02623	3.03331	1.81261	2.1483	-0.35414	-1.20863	-2.82607	-4.35194	-2.06313	-3.03969	-1.6664	-1.97157	-0.81191		12.8	0.81422	0.44801	0.66164	-1.6577	0.53957	0.87526	1.39406	-0.25389	0.72267	0.63112	0.50905	-0.31493	-0.437	-1.93236		12.8	0.79553	1.89416	1.67444	2.88293	1.47913	0.29504	0.75891	-0.53503	-1.10876	-0.03455	-1.36511	1.51575	0.06311	-0.54724		12.8	-0.7964
12.85	1.17163	1.93457	2.17871	2.30078	1.2937	-1.02563	-2.0022	-3.37549	-4.38257	-2.55151	-2.82617	-2.1853	-1.97168	-0.32373		12.85	0.44801	0.53957	0.78371	-1.44408	0.50905	1.05836	1.57716	-0.25389	0.72267	0.63112	0.44801	-0.34544	-0.28441	-1.90184		12.85	0.68557	1.57668	1.27151	1.93069	1.23489	0.3804	1.21047	-0.03464	-0.96238	-0.08347	-0.73044	1.2471	0.28274	-0.41306		12.85	-0.79635
12.9	0.68325	1.75136	1.90395	2.27016	0.7748	-0.93419	-6.5189	-3.49766	-4.93199	-3.10093	-2.91783	-1.66661	-2.06334	-0.01866		12.9	0.23439	0.29543	0.87526	-1.35252	0.44801	1.33302	1.42458	-0.22337	0.53957	0.75319	0.4175	-0.28441	-0.16234	-1.74925		12.9	1.03948	0.85637	1.57659	1.32024	1.28362	0.11174	1.16155	-0.36433	-0.79158	-0.51081	-0.41316	0.81975	0.35588	-0.63288		12.9	-1.04043
12.95	0.59159	1.62919	2.05643	2.63627	0.07279	-0.2629	-12.2258	-3.13156	-4.53537	-3.3757	-3.22311	-2.27706	-2.21603	-0.65963		12.95	0.35646	0.0818	0.90578	-1.56615	0.44801	1.36354	1.39406	-0.1013	0.11232	1.05836	0.29543	-0.31493	-0.13182	-1.50511		12.95	0.95393	0.85627	1.88167	1.64973	0.68538	-0.21794	0.81965	-0.26677	-0.25457	-0.41326	-0.35222	0.68538	0.29475	-0.59636		12.95	-1.34556
13	0.43889	1.8427	2.11736	2.48357	0.37786	-0.04939	-10.6085	-2.79597	-4.96272	-3.74201	-3.13166	-2.49079	-2.39924	-1.08698		13	0.14284	-0.25389	0.99733	-1.90184	0.53957	1.36354	1.66872	-0.1013	0.11232	1.02785	0.11232	0.02077	-0.49803	-1.53563		13	0.3801	0.45335	1.39329	1.18577	0.68528	0.79514	0.63645	-0.20584	-0.25466	-0.12039	-0.24246	0.41672	-0.03494	-0.3157		13	-1.65068
13.05	0.34724	1.75105	2.66657	2.0257	0.49982	-0.14104	-2.4909	-3.0097	-4.2304	-3.16228	-3.0097	-2.94866	-2.36883	-0.99554		13.05	0.05128	-0.437	0.99733	-2.1765	0.87526	0.99733	1.79079	0.0818	0.26491	0.99733	0.14284	0.29543	-0.55907	-1.38304		13.05	-0.04724	0.97815	1.56409	0.86829	0.84387	1.05139	0.30676	-0.4989	-0.91394	0.00159	-0.38904	0.88049	-0.328	-0.328		13.05	-1.68114
13.1	0.71334	2.36129	2.36129	1.90353	0.53024	-0.29374	5.93185	-3.16239	-4.32206	-3.31498	-2.85721	-2.42997	-1.88065	-0.78202		13.1	-0.25389	-0.437	0.75319	-2.3596	1.05836	0.50905	1.69923	0.35646	0.44801	0.96681	0.02077	0.47853	-1.01683	-1.38304		13.1	-0.07175	1.56399	1.29543	0.8804	1.11233	0.78274	0.59963	-0.47458	-1.14597	0.41653	-0.87742	0.90481	-0.03513	-0.56003		13.1	-1.71161
13.15	0.53013	2.57481	2.11705	1.75083	0.80479	0.6522	8.31211	-3.16249	-4.53579	-2.76577	-3.25405	-2.15541	-1.30092	-0.69057		13.15	-0.00975	-0.34544	0.66164	-2.20702	0.99733	0.47853	1.48561	0.57008	0.75319	0.96681	-0.04027	0.75319	-1.26097	-1.32201		13.15	0.3676	1.63713	1.25872	0.80706	1.78362	0.42864	0.64836	-0.65779	-1.5489	0.69719	-0.95076	0.59954	0.09905	-0.64558		13.15	-1.65052
13.2	0.8352	2.05591	2.11694	2.08642	0.6521	1.50659	4.07007	-2.36914	-4.74951	-3.1626	-3.58984	-1.9419	-1.33154	-0.66016		13.2	0.32594	-0.19286	0.4175	-2.1765	0.81422	0.35646	1.08888	0.72267	0.63112	1.1194	-0.28441	0.69215	-1.59666	-1.07787		13.2	0.06233	1.97883	1.46614	1.31965	1.9178	0.0135	0.67268	-1.0241	-1.39031	0.78254	-0.82878	0.07454	-0.1574	-0.80437		13.2	-1.58943
13.25	0.89613	1.81166	1.8727	2.23891	0.4994	0.59096	-0.66026	-1.88097	-4.87169	-3.16271	-4.04772	-1.30113	-2.12511	-1.08751		13.25	0.90578	-0.19286	0.44801	-2.08495	0.50905	0.50905	1.14992	0.50905	0.81422	0.96681	-0.16234	0.72267	-1.74925	-0.6201		13.25	-0.35281	1.52708	1.44163	1.33176	1.89329	0.20872	0.74583	-0.95095	-1.39041	0.40403	-0.70681	-0.48708	-0.24294	-0.75564		13.25	-1.58938
13.3	0.77396	1.47586	1.78104	1.96414	0.95706	-0.05002	-3.37643	-2.55246	-4.13937	-3.68161	-3.65109	-1.60641	-1.82004	-1.27072		13.3	1.08888	-0.1013	0.17336	-2.14598	0.69215	0.38698	0.96681	0.6006	0.81422	0.90578	0.29543	0.29543	-1.6577	-0.49803		13.3	0.3429	1.52698	2.24719	1.41711	1.68567	0.12317	0.42835	-1.06091	-1.19519	-0.29187	-0.14539	-0.81677	-0.89001	-0.5238		13.3	-1.43674
13.35	0.74333	1.3842	2.20818	1.903	1.53679	-0.29426	-2.67463	-2.73567	-4.44465	-4.32258	-3.52913	-1.0572	-1.72859	-1.30134		13.35	1.1194	-0.13182	0.29543	-1.90184	0.75319	0.44801	1.02785	0.53957	1.18044	0.57008	0.72267	0.11232	-1.47459	-0.71165		13.35	0.53811	1.55129	2.62551	1.19729	1.23391	-0.09665	0.03762	-0.89011	-0.68259	-0.25535	-0.07224	-0.63376	-0.73142	-0.6948		13.35	-1.58927
13.4	0.71271	1.93341	2.4217	1.47565	1.75031	-0.23333	-1.36248	-3.59027	-4.26165	-4.20062	-2.85784	-1.57611	-1.45404	-0.99627		13.4	0.69215	-0.13182	0.32594	-1.90184	0.99733	0.47853	0.87526	0.38698	1.51613	0.66164	0.96681	0.05128	-1.29149	-1.10838		13.4	0.53801	1.00188	2.57659	0.59905	0.81878	0.28167	0.18401	-0.46296	-0.62165	-0.12117	-0.04792	-0.38972	-0.64607	-0.71931		13.4	-1.34508
13.45	0.28536	1.87227	2.87935	0.92623	1.50606	0.40743	-0.75224	-3.19364	-4.75004	-4.5059	-2.67484	-1.57621	-2.12553	-0.5081		13.45	0.57008	0.02077	0.66164	-1.71873	0.87526	0.53957	0.90578	0.17336	1.60768	0.81422	0.78371	0.50905	-1.35252	-1.32201		13.45	0.35481	0.76985	2.35676	0.53792	0.1595	0.3304	0.19612	-0.14568	-0.3532	0.06184	0.04963	0.3426	-0.54851	-0.69499		13.45	-1.22295
13.5	-0.17251	1.38389	2.9708	1.07871	0.68198	0.13267	-0.44717	-3.16323	-4.96377	-4.26186	-2.49184	-2.09512	-1.75942	-0.29458		13.5	0.29543	0.38698	0.47853	-1.74925	1.14992	0.53957	0.78371	0.17336	1.57716	0.87526	0.69215	0.75319	-1.32201	-1.47459		13.5	0.11057	0.64768	1.83176	0.48899	0.18381	0.47678	0.59885	0.08616	-0.25564	0.57444	0.25706	0.42795	-0.37771	-0.38992		13.5	-0.85669
13.55	0.28515	1.38378	2.29931	1.32275	0.92602	0.49877	-1.08814	-3.40748	-4.90284	-4.78077	-3.13282	-1.91212	-2.21729	-0.20313		13.55	0.35646	0.75319	0.6006	-1.56615	1.08888	0.84474	0.78371	0.14284	1.30251	0.57008	0.38698	1.02785	-1.26097	-1.23045		13.55	0.30579	0.58655	1.64856	0.40344	0.8429	0.69641	0.90393	-0.32898	-0.75622	0.23254	0.24475	-0.14587	0.0006114	-0.41443		13.55	-0.73456
13.6	0.31556	1.35316	2.36024	1.17005	0.04091	0.68177	-1.72911	-3.4381	-5.11657	-4.29259	-3.25499	-1.8817	-2.12584	-0.69152		13.6	0.29543	0.75319	0.29543	-1.74925	1.27199	0.78371	0.69215	0.17336	0.99733	0.29543	0.17336	0.81422	-1.19994	-1.26097		13.6	0.13479	0.95266	1.48977	0.52542	1.23342	0.64749	0.91604	-1.13474	-0.86619	0.07376	-0.25583	0.13479	-0.24363	-0.3779		13.6	-1.00917
13.65	0.71219	1.32254	1.87185	1.50564	-0.32541	0.01028	-2.2175	-3.56027	-4.71994	-4.32321	-3.16355	-1.30197	-2.33957	-0.44748		13.65	0.44801	0.81422	0.4175	-1.59666	0.87526	0.93629	0.78371	0.32594	0.63112	-0.16234	0.17336	0.69215	-1.01683	-0.89476		13.65	-0.14607	0.98919	1.68499	0.76946	1.42864	0.62297	1.22112	-1.37898	-1.0738	-0.14607	-0.76863	0.06145	-0.43904	-0.07283		13.65	-1.22274
13.7	1.10881	2.45158	1.38347	1.35295	-0.02034	0.04069	-2.09554	-2.91951	-5.29988	-4.32332	-2.37019	-1.42415	-2.06502	-1.11897		13.7	0.63112	0.72267	0.50905	-1.62718	0.6006	0.69215	0.66164	0.38698	0.35646	-0.58958	0.29543	0.20387	-0.89476	-0.98631		13.7	-0.0363	0.8304	2.09993	1.12337	1.72151	0.1468	0.72053	-1.57439	-1.51335	-0.36589	-0.31706	-0.29265	-0.549	-0.42693		13.7	-1.49734
13.75	1.20026	2.69562	1.56647	1.38336	-0.47821	-0.60028	-1.45477	-2.76703	-5.20843	-4.41498	-2.06512	-1.75995	-1.75995	-0.75287		13.75	0.78371	0.96681	0.6006	-1.59666	0.20387	0.75319	0.78371	0.6006	0.47853	-0.9558	0.44801	0.14284	-0.58958	-0.83372		13.75	0.09788	0.81809	2.08762	1.19651	1.24534	-0.18288	0.40305	-1.22048	-1.46462	-0.10964	-0.25613	-0.06081	-0.65896	-0.64675		13.75	-1.3447
13.8	0.89498	2.57344	1.90206	1.90206	-0.38676	-0.87504	-1.85161	-2.52299	-5.42216	-5.02543	-1.63798	-2.21782	-1.57695	-1.05815		13.8	1.05836	0.99733	0.75319	-1.59666	0.32594	0.50905	0.63112	0.44801	0.4175	-0.71165	0.38698	0.05128	-0.86424	-0.98631		13.8	0.63489	0.08557	1.6969	0.59827	1.24524	0.45178	0.37854	-0.46374	-1.36706	0.19544	-0.81775	-0.10974	-0.0365	-0.40271		13.8	-1.06999
13.85	1.04746	2.75644	1.90195	1.50522	0.13193	-0.99722	-2.40103	-2.06533	-5.60537	-4.93399	-2.15689	-2.27896	-1.18032	-0.75308		13.85	1.02785	0.99733	0.57008	-1.56615	0.50905	0.69215	1.08888	0.26491	0.72267	-0.49803	0.4175	0.05128	-0.68114	-0.92528		13.85	0.51272	0.1221	1.56253	0.31741	1.50149	0.56155	0.40286	-0.03659	-1.41599	0.41507	-1.14743	-0.46384	0.02444	-0.15867		13.85	-0.61217
13.9	0.89477	2.87841	1.81029	1.53563	0.86425	-0.57008	-2.03492	-1.8213	-5.48341	-5.69703	-2.27906	-1.27198	-1.57716	-0.81422		13.9	1.21095	0.84474	0.66164	-1.32201	0.66164	0.72267	1.24147	0.14284	0.63112	-0.13182	0.02077	-0.07079	-0.65062	-0.77269		13.9	-0.15876	0.36614	1.33049	0.10979	1.81878	0.53704	0.50042	0.35393	-0.92781	0.76897	-1.18415	-0.25642	-0.03669	-0.10993		13.9	-0.0628
13.95	0.46742	2.63416	1.44398	1.87122	1.23035	0.25379	-1.54675	-1.24157	-6.00231	-5.20885	-2.98107	-1.1195	-1.21105	-0.63122		13.95	0.93629	0.78371	0.4175	-1.35252	0.84474	0.84474	1.60768	0.0818	0.90578	-0.1013	-0.1013	-0.07079	-0.52855	-0.77269		13.95	-0.2321	0.36604	1.37923	-0.000169032	2.368	0.89094	0.50032	0.42708	-1.23308	0.74446	-0.48845	0.08528	0.17073	0.23176		13.95	0.05932
14	0.6199	2.26785	1.19973	2.23733	0.89456	0.40628	-1.15012	-1.27219	-5.72776	-4.99534	-2.79807	-1.02805	-1.72996	-0.60081		14	0.81422	0.93629	0.53957	-1.23045	0.78371	0.84474	1.54665	0.47853	0.84474	0.0818	-0.00975	0.29543	-0.58958	-0.68114		14	0.01194	0.41477	2.01389	0.74436	2.34348	0.89085	0.23167	-0.20779	-1.33083	-0.0613	0.56126	0.18284	0.1218	-0.09792		14	-0.15425
14.05	0.92497	2.20671	1.16911	2.26774	-0.29573	-0.20418	-1.88265	-1.63851	-5.91097	-4.38509	-3.04232	-1.63851	-1.57747	-0.38729		14.05	0.50905	0.84474	0.29543	-1.32201	1.05836	0.50905	1.42458	0.57008	0.81422	0.02077	0.29543	0.53957	-0.6201	-0.92528		14.05	0.68323	0.57337	2.28235	1.08606	1.87952	0.6344	0.4635	-0.50085	-1.03796	-0.72058	0.8053	0.34143	-0.0614	-0.83044		14.05	-0.58144
14.1	1.23004	2.23712	0.58917	2.23712	-0.5705	-0.38739	-2.64569	-1.69965	-5.39227	-4.08002	-2.58466	-1.39447	-2.18793	-0.32636		14.1	0.4175	0.90578	0.32594	-1.07787	0.93629	0.44801	1.54665	0.87526	0.47853	-0.13182	0.47853	0.93629	-0.22337	-0.86424		14.1	1.45217	1.01272	2.44094	1.11038	1.63528	0.30471	0.93948	-0.52536	-1.35544	-0.84275	0.54885	-0.31784	0.09719	-0.91599		14.1	-1.1307
14.15	2.02339	2.42012	0.58907	1.44356	-0.3875	-0.26543	-1.82182	-2.09648	-4.87358	-4.20219	-2.88994	-1.33354	-1.73027	-1.33354		14.15	0.53957	0.90578	0.35646	-1.01683	1.30251	0.17336	1.45509	0.93629	0.47853	-0.13182	0.26491	0.78371	-0.13182	-1.04735		14.15	1.03704	1.62298	2.56292	0.90276	1.3178	-0.13484	0.46331	-0.70857	-1.64851	-0.5987	0.34124	-0.78181	0.23137	-0.84284		14.15	-1.13065
14.2	2.17587	1.96225	1.32138	1.535	-0.2045	0.1312	-1.18106	-2.15762	-4.9042	-4.08023	-3.1647	-1.48623	-1.33365	-1.30313		14.2	0.26491	1.18044	0.6006	-1.10838	1.6382	0.38698	1.54665	0.72267	0.72267	-0.16234	0.26491	0.84474	0.11232	-0.68114		14.2	0.08479	1.78157	2.1844	0.38997	0.98811	-0.39128	-0.17156	-0.51335	-1.48991	-0.01286	-0.46453	-0.57439	-0.28142	-0.4279		14.2	-1.3137
14.25	1.90111	1.56542	1.65697	1.29076	0.55834	0.71093	-0.2046	-2.34083	-4.2024	-4.59913	-3.25636	-1.21168	-1.54738	-1.69996		14.25	0.44801	1.30251	1.18044	-0.9558	1.88234	0.38698	1.30251	0.78371	0.81422	0.0818	0.29543	0.69215	-0.00975	-0.58958		14.25	-0.04958	1.20774	1.76926	0.67063	1.6594	-0.22048	-0.84304	-0.39138	-1.42898	0.25559	-1.08718	-0.23269	-0.46462	-0.22048		14.25	-1.16106
14.3	1.87049	1.38221	1.80945	0.77186	0.55823	0.95496	-0.0216	-2.67663	-4.08044	-4.75183	-3.10388	-1.63903	-1.70007	-1.33386		14.3	0.47853	1.18044	1.33302	-0.86424	1.88234	0.78371	1.39406	0.63112	1.24147	-0.00975	0.75319	0.66164	0.17336	-0.83372		14.3	0.0846	1.29309	1.57385	1.58606	1.6471	0.06018	-0.85534	-0.4281	-1.17273	0.01135	-1.50232	-0.31824	-0.98962	-0.48913		14.3	-1.28308
14.35	1.62624	2.05349	2.11452	0.8633	0.43606	1.29055	-0.60154	-2.73777	-4.53831	-4.32469	-2.70725	-1.70017	-2.21897	-2.03587		14.35	0.87526	1.14992	1.48561	-0.65062	1.72975	0.99733	1.02785	0.81422	1.21095	0.05128	0.96681	0.44801	0.38698	-0.98631		14.35	0.47512	1.00003	1.293	1.9888	1.56155	0.41409	-0.14743	-0.24509	-0.62351	0.29202	-1.46579	-0.33054	-0.92868	-0.97751		14.35	-1.5882
14.4	1.59562	2.11442	2.11442	1.07682	0.58854	1.01579	-1.08993	-3.07357	-4.78255	-3.68392	-3.1346	-2.21908	-1.54769	-1.30355		14.4	0.96681	1.1194	1.18044	-0.92528	1.6382	1.05836	0.99733	0.96681	1.30251	-0.04027	1.27199	0.44801	0.72267	-1.04735		14.4	0.52385	1.08538	1.4638	2.07415	1.68352	0.69475	0.36516	-0.17195	-0.59919	0.35296	-1.17292	-0.2696	-0.41609	-0.80671		14.4	-1.55763
14.45	1.07672	2.23638	1.87017	1.565	0.61895	-0.02192	-2.12763	-3.2873	-4.75214	-3.04316	-2.98212	-2.34125	-1.66987	-0.32709		14.45	1.02785	1.33302	1.33302	-1.10838	1.42458	1.27199	0.96681	0.99733	0.96681	-0.1013	1.05836	0.57008	0.84474	-0.77269		14.45	0.243	1.59798	2.06184	1.91536	1.53694	0.52376	0.45052	-0.17204	-0.39177	0.24299	-0.84343	-0.19646	0.02327	-0.92888		14.45	-1.9543
14.5	0.64936	2.90766	1.748	1.80903	0.16108	-0.66289	-2.79912	-2.46343	-4.47759	-3.34844	-3.71465	-2.34136	-1.3648	0.06953		14.5	0.90578	1.39406	1.21095	-1.59666	1.48561	1.02785	0.93629	1.08888	0.81422	0.11232	0.6006	0.53957	0.75319	-0.83372		14.5	0.31614	1.23167	1.79319	1.15843	1.51243	0.45042	0.18186	0.2551	-0.39187	0.05979	-0.42849	0.13303	0.16966	-1.02663		14.5	-1.98477
14.55	0.64926	2.87704	1.16806	2.14462	0.09994	-0.90714	-3.01285	-2.06681	-4.50821	-3.50113	-3.22647	-2.24991	-1.8837	0.13046		14.55	0.99733	1.60768	1.30251	-1.56615	1.24147	1.08888	0.93629	0.87526	0.50905	0.38698	0.29543	0.72267	0.69215	-0.55907		14.55	0.10852	1.01184	1.70764	1.08509	1.19495	0.09632	-0.07458	0.62122	-0.99011	-0.2821	-0.07458	0.51136	0.40149	-1.25866		14.55	-2.07627
14.6	0.49657	3.02952	0.74071	2.08348	0.16087	-0.6631	-3.22658	-1.57863	-4.69142	-3.47072	-3.37917	-1.60915	-2.43312	-0.08327		14.6	1.02785	1.54665	1.08888	-1.29149	1.42458	0.84474	0.84474	0.96681	0.32594	0.57008	0.32594	0.57008	0.26491	-0.437		14.6	-0.41648	1.21927	1.91507	1.20706	1.06057	0.02298	-0.30661	0.35257	-1.41745	-0.47751	0.36477	0.49905	0.20608	-1.45407		14.6	-1.40482
14.65	0.64905	2.38855	1.2594	2.38855	0.00818	-0.26648	-3.22668	-1.88391	-4.69153	-3.53186	-2.43323	-1.85339	-2.64685	0.06922		14.65	0.99733	1.54665	1.14992	-0.77269	1.24147	1.02785	0.93629	0.87526	0.35646	0.38698	0.38698	0.75319	-0.1013	-0.1013		14.65	-0.51423	1.80511	1.976	1.60979	1.37786	0.30364	-0.1114	0.19378	-1.49079	-0.2823	0.38909	0.63323	-0.1114	-1.00251		14.65	-0.88597
14.7	1.04567	1.59499	1.59499	2.44948	0.2217	0.03859	-2.98265	-2.52488	-5.30198	-3.28782	-2.86058	-1.76194	-2.83006	-0.90745		14.7	0.90578	1.45509	1.05836	-0.71165	1.14992	0.72267	0.78371	0.99733	0.47853	0.47853	0.29543	0.63112	-0.80321	-0.55907		14.7	-0.01384	2.17122	2.01253	2.28108	1.71956	0.38899	0.0472	-0.1115	-1.13689	-0.57536	0.4012	0.60872	0.12044	-0.51433		14.7	-0.76385
14.75	0.86246	1.50333	1.59488	1.56437	-0.35824	0.19108	-3.16586	-2.34188	-5.30209	-3.10482	-3.04379	-2.67758	-2.09774	-0.87704		14.75	1.02785	1.57716	1.08888	-0.86424	0.75319	0.66164	0.93629	1.18044	0.69215	0.63112	0.05128	0.84474	-1.01683	-0.9558		14.75	0.26682	2.3054	2.04905	2.67161	1.45091	0.16917	0.32786	-0.44118	-0.58767	-0.68532	0.4011	0.58421	0.13255	-0.05056		14.75	-0.88587
14.8	0.49615	1.19805	1.19805	1.19805	-0.35835	0.95391	-2.67768	-2.37251	-5.05805	-3.13545	-3.13545	-2.89131	-2.28095	-1.24336		14.8	0.99733	1.39406	0.99733	-0.92528	0.66164	0.17336	0.84474	0.99733	0.78371	0.93629	-0.00975	0.47853	-1.16942	-1.26097		14.8	0.51087	1.71936	2.17102	2.70813	1.58509	0.25452	0.60852	-0.49011	-0.16052	-0.6488	0.05921	0.92591	0.26673	-0.33142		14.8	-0.94685
14.85	0.37397	1.38105	0.7707	1.35053	-0.17535	0.86225	-2.03692	-2.67779	-4.99712	-3.13555	-3.19659	-2.61675	-1.73174	-1.24346		14.85	0.99733	1.45509	1.27199	-0.77269	0.6006	0.11232	1.08888	0.78371	1.05836	0.6006	0.29543	0.53957	-0.80321	-0.98631		14.85	0.58401	1.40188	2.17093	2.73245	1.81692	0.33987	0.47415	-0.92966	-0.3071	-0.74655	-0.07517	0.75491	0.5596	-0.19724		14.85	-0.6111
14.9	0.80111	1.71664	0.83163	1.50302	0.2518	0.77059	-1.94547	-2.73893	-4.0817	-3.5629	-2.61686	-2.67789	-1.1215	-0.87735		14.9	0.90578	1.33302	1.36354	-0.58958	0.78371	-0.04027	1.02785	0.35646	1.08888	0.44801	0.66164	0.32594	-0.55907	-0.89476		14.9	0.60833	1.41399	2.02434	2.4638	1.6093	0.08343	0.10784	-1.07624	-0.31941	-1.07624	0.12005	0.02239	0.75481	-0.17292		14.9	-0.55001
14.95	0.49583	2.44896	1.71653	1.07566	0.40428	1.25877	-1.67092	-2.8611	-4.66164	-2.89162	-2.37282	-1.94557	-0.66384	-0.93849		14.95	0.99733	1.6382	1.14992	-0.34544	0.81422	0.50905	1.18044	0.53957	1.30251	0.02077	0.81422	0.50905	-0.07079	-0.86424		14.95	0.76692	1.21858	1.0721	2.07307	1.48714	0.51057	0.05891	-0.84441	-0.19743	-1.0031	-0.09978	-0.03874	0.30305	-0.53923		14.95	-0.33633
15	0.43469	3.02868	2.44885	1.50281	0.58728	1.16711	-1.82361	-3.16638	-5.21106	-2.52552	-1.33533	-2.18982	-0.60291	-0.51136		15	0.99733	1.51613	0.81422	-0.16234	1.18044	0.87526	0.99733	0.63112	1.05836	0.0818	0.72267	0.53957	0.0818	-1.07787		15	0.22972	1.27952	1.21848	2.4514	0.82786	0.64475	-0.1365	-0.53933	-0.29519	-0.67361	-0.51491	0.49827	0.05882	-0.68581		15	-0.82456
15.05	-0.20628	3.2422	2.66237	1.68581	0.25148	0.61769	-2.09837	-3.13597	-5.45531	-2.46459	-1.70165	-1.85423	-1.24388	-1.06078		15.05	1.08888	1.66872	0.78371	0.05128	1.21095	1.27199	1.05836	0.93629	0.93629	-0.25389	0.57008	1.02785	0.29543	-0.80321		15.05	-0.12439	1.31604	1.31604	2.65882	0.3761	0.66907	-0.08777	-0.79577	-0.58825	-0.75915	-0.41736	0.64466	-0.25866	-0.5028		15.05	-0.9771
15.1	0.49552	2.54019	2.63175	1.53311	-0.51156	0.83121	-1.67123	-3.38022	-5.63852	-2.19003	-1.91537	-1.2745	-1.33554	-0.78622		15.1	0.84474	1.39406	0.63112	0.17336	1.24147	1.36354	0.87526	0.90578	0.53957	-0.07079	0.29543	1.14992	0.02077	-0.74217		15.1	-0.30759	1.46243	1.29153	2.40237	0.92532	1.03518	0.47366	-0.94235	-0.91794	-0.73484	-0.40525	0.62015	-0.40525	0.04641		15.1	-1.09911
15.15	1.07524	2.41802	1.65508	1.47197	-0.66426	1.41094	-1.54927	-3.50239	-5.54707	-2.80049	-2.58686	-1.0915	-2.15962	-1.30513		15.15	0.78371	1.45509	0.6006	0.35646	0.84474	1.45509	0.84474	1.02785	0.26491	-0.13182	0.23439	1.42458	-0.22337	-0.52855		15.15	-0.29548	1.87737	1.52337	2.04827	1.74309	1.43792	0.77874	-0.90583	-1.35749	-0.79597	-0.1612	0.48577	-0.03913	0.63226		15.15	-0.85492
15.2	1.62445	1.71601	1.77704	1.04462	-0.38971	1.5329	-1.36627	-3.25836	-5.15045	-2.89215	-2.70904	-1.09161	-2.12921	-1.79351		15.2	0.50905	1.14992	0.44801	0.26491	0.84474	1.14992	0.66164	0.72267	-0.13182	0.11232	0.02077	1.33302	-0.55907	-0.68114		15.2	-0.47868	2.31673	1.51106	2.10921	1.69417	1.77962	0.3636	-0.75944	-1.24773	-0.99138	0.27815	0.38802	-0.3322	0.32698		15.2	-0.88538
15.25	1.31917	1.92953	1.56331	0.55624	0.34261	1.74642	-1.36637	-3.35001	-4.69279	-2.77018	-2.52604	-2.15983	-1.85465	-1.70207		15.25	0.63112	1.24147	0.53957	0.17336	0.6006	1.08888	0.63112	0.4175	-0.31493	0.11232	0.02077	1.24147	-0.58958	-0.65062		15.25	-0.19802	2.0969	1.98704	2.02366	1.43772	1.75511	0.03391	-0.62527	-0.73513	-0.96706	0.20481	0.76634	-0.02712	0.07054		15.25	-0.73274
15.3	0.61716	1.68528	2.29563	0.64768	0.34251	1.04441	-1.397	-2.70925	-4.26565	-2.64822	-2.55666	-2.12942	-1.18337	-1.48855		15.3	0.72267	1.21095	0.35646	-0.16234	0.57008	0.93629	0.50905	0.23439	-0.37596	0.47853	0.23439	0.93629	-0.55907	-0.55907		15.3	0.14368	1.97474	2.10901	2.47522	1.37659	1.76722	-0.01501	-0.99157	-1.15026	-0.67419	0.15589	0.82727	-0.03942	-0.36901		15.3	-0.73269
15.35	0.89172	2.75329	1.80724	0.76965	0.18981	0.46447	-2.22107	-2.6178	-3.89954	-2.00745	-2.03797	-1.79383	-0.54261	-0.78675		15.35	0.93629	1.48561	0.47853	-0.1013	0.14284	1.05836	0.4175	0.20387	-0.16234	0.38698	0.66164	0.84474	-0.25389	-0.16234		15.35	0.24124	2.19436	1.9136	2.93899	1.26663	1.13235	-0.10056	-1.29685	-1.78513	-0.46677	0.54642	1.2178	-0.16159	-0.21042		15.35	-0.82419
15.4	0.46437	2.57008	1.83766	0.98317	-0.11547	0.73903	-2.37377	-2.55687	-3.71654	-1.85497	-2.55687	-1.64135	-1.06151	-1.03099		15.4	0.81422	1.42458	0.44801	-0.1013	0.29543	0.84474	0.14284	0.20387	-0.00975	0.11232	1.02785	0.75319	-0.1013	0.02077		15.4	0.58294	2.04778	2.15765	2.41399	1.41302	0.92474	0.24114	-1.10163	-1.99275	0.28997	0.14349	0.94915	-0.30817	-0.02741		15.4	-0.97672
15.45	0.89151	3.02774	1.19668	1.77652	-0.05454	0.73892	-2.5875	-2.37387	-3.25888	-2.52646	-2.40439	-1.30576	-1.5499	-0.26816		15.45	0.87526	1.18044	0.78371	0.17336	0.66164	1.08888	-0.00975	0.17336	0.17336	-0.25389	1.18044	0.84474	0.02077	-0.1013		15.45	0.59505	2.08431	2.46272	1.96224	1.46175	0.90022	0.66829	-0.46696	-1.9196	0.25325	0.00911	0.70491	-0.65007	0.20442		15.45	-1.00719
15.5	0.64726	2.72246	1.50175	1.71538	-0.29878	0.40312	-2.46553	-2.61812	-3.50313	-3.56416	-2.64864	-1.09224	-1.45845	-0.17671		15.5	0.75319	0.66164	0.90578	0.05128	1.45509	1.1194	-0.31493	0.29543	0.17336	-0.22337	1.21095	0.84474	0.02077	-0.19286		15.5	0.26536	2.04759	2.29173	1.86448	1.25413	0.55833	0.65599	-0.29616	-1.19948	-0.03982	-0.3572	0.10667	-0.50368	0.17991		15.5	-0.9461
15.55	0.83026	2.6308	1.31854	2.17304	-0.29889	0.73871	-2.25201	-3.50323	-3.53375	-3.93048	-2.46564	-0.6651	-1.06183	-0.23785		15.55	0.96681	0.38698	1.27199	0.11232	1.72975	1.36354	-0.55907	0.26491	0.23439	-0.22337	1.02785	0.93629	-0.00975	-0.46751		15.55	-0.24743	1.97425	2.37708	1.83997	1.03431	0.48499	0.97327	0.1554	-0.30847	0.11878	-0.32067	-0.0155	-0.55261	-0.03991		15.55	-0.94604
15.6	1.04378	2.50862	1.10482	1.65413	0.37239	0.76912	-2.86247	-4.02214	-3.28972	-3.62541	-2.67936	-0.29899	-0.63469	-0.36003		15.6	1.05836	0.32594	1.18044	-0.07079	2.03493	1.18044	-0.49803	0.4175	0.0818	0.02077	1.08888	1.05836	-0.04027	-0.34544		15.6	0.03323	1.96194	1.73001	1.66897	1.62015	0.54593	1.022	0.08206	0.04544	0.08206	-0.87009	0.27737	0.00882	-0.67478		15.6	-0.82392
15.65	1.01316	1.98972	0.43332	1.74558	0.58591	0.52488	-3.28982	-3.65603	-3.68655	-3.41189	-3.16775	-0.66531	-1.21463	-1.24514		15.65	1.27199	0.69215	1.18044	0.02077	1.8213	1.18044	-0.16234	0.72267	-0.00975	0.17336	0.84474	0.90578	-0.22337	-0.28441		15.65	0.03313	2.19378	1.91302	1.66888	1.79095	0.46038	0.74114	0.143	0.41155	0.21624	-0.96784	0.21624	0.38714	-0.7237		15.65	-0.61024
15.7	1.68444	2.4779	0.70788	1.80651	0.34167	0.49425	-2.71009	-3.38148	-3.83924	-4.29701	-2.49647	-0.84852	-1.39784	-1.21473		15.7	0.96681	1.02785	0.69215	0.05128	1.60768	0.81422	0.23439	1.21095	0.20387	0.23439	0.72267	0.63112	-0.34544	0.02077		15.7	0.10628	1.98616	2.24251	1.07063	1.93733	0.70442	0.54573	-0.05241	0.05745	-0.45525	-0.83366	-0.18669	0.30159	-0.93132		15.7	-0.4576
15.75	0.5857	1.74537	1.28761	2.1421	0.37208	0.52467	-1.88622	-2.55761	-3.50365	-4.11401	-2.61865	-1.09277	-1.03173	-1.45898		15.75	0.87526	1.05836	0.4175	0.26491	1.30251	0.47853	0.29543	1.30251	0.26491	0.26491	0.23439	0.0818	-0.77269	-0.40648		15.75	0.32591	1.82737	2.43772	1.14378	2.64524	1.19261	-0.05251	-1.29763	0.43577	-0.3821	0.04515	-0.41872	0.28929	-0.29665		15.75	-0.39651
15.8	0.82974	1.83682	2.3251	1.74526	0.64663	0.34146	-1.82529	-2.06943	-3.41221	-3.93101	-2.09995	-1.42856	-1.42856	-1.03184		15.8	0.66164	0.90578	0.0818	0.26491	1.1194	0.14284	0.53957	1.42458	0.63112	0.20387	0.32594	-0.1013	-0.68114	-0.55907		15.8	0.09388	1.76624	2.7306	1.25354	2.84046	1.40003	0.1305	-1.48083	0.28919	-0.58972	-0.02819	-0.36999	0.20374	-0.26013		15.8	-0.42698
15.85	0.58549	1.31791	2.84379	1.86723	0.7686	0.58549	-1.21505	-2.06954	-3.93111	-3.90059	-2.25264	-0.87935	-1.18453	-1.03194		15.85	0.66164	0.78371	0.38698	0.20387	0.93629	0.26491	0.53957	1.33302	0.84474	0.23439	0.05128	-0.13182	-0.68114	-0.92528		15.85	0.20364	1.60745	1.97366	0.89944	2.77933	1.75394	0.19144	-1.68845	0.59427	-0.00388	0.10599	0.41116	0.26468	0.53323		15.85	-0.67106
15.9	1.40936	1.68402	2.44696	1.74505	1.04315	0.6159	-1.03205	-2.3443	-4.20587	-3.71759	-2.10016	-1.18463	-1.33722	-1.42877		15.9	0.44801	0.96681	0.66164	-0.00975	0.66164	0.63112	0.90578	1.21095	1.24147	0.20387	0.02077	0.47853	-0.19286	-0.83372		15.9	0.52093	1.75384	2.01019	1.1679	2.12005	1.21673	0.33782	-0.96833	0.1181	0.05706	-0.29694	0.52093	-0.43122	0.38665		15.9	-0.91515
15.95	1.53133	1.74495	2.62996	2.38582	0.55476	0.58528	-1.18474	-2.6801	-4.7553	-4.38908	-2.10027	-1.1237	-1.58147	-0.75749		15.95	0.63112	0.96681	0.84474	-0.04027	0.57008	1.1194	0.87526	0.84474	1.14992	0.44801	-0.00975	0.78371	-0.13182	-0.92528		15.95	1.28987	1.63167	1.64388	1.28987	1.27767	1.03353	0.26448	-1.07829	0.17903	0.08138	0.05696	0.59407	-0.12614	0.31331		15.95	-1.25079
16	2.14157	1.65329	2.3552	2.05002	0.85983	0.73776	-0.9407	-3.13797	-4.99954	-4.84695	-2.80228	-1.58157	-1.36795	-0.97122		16	0.84474	1.27199	0.87526	-0.22337	0.63112	1.48561	1.02785	0.78371	1.18044	0.29543	0.29543	1.1194	0.05128	-0.83372		16	1.91233	1.42405	2.11985	1.8513	0.8137	0.33763	0.42308	-0.27272	-0.48024	0.2888	-0.2361	0.17894	-0.33376	-0.06521		16	-1.09815
16.05	2.29405	2.66027	2.41612	2.5382	0.40196	1.25646	-0.91029	-3.13807	-4.87758	-5.33534	-2.80238	-2.10048	-1.97841	-1.33754		16.05	0.99733	1.30251	0.84474	-0.22337	0.93629	1.21095	0.90578	0.6006	0.66164	0.20387	0.69215	0.87526	-0.00975	-0.86424		16.05	1.75355	1.47278	1.72913	1.57044	0.39856	0.66712	0.05677	-0.33386	-0.37048	0.1178	-0.16296	0.08118	0.03235	-0.45593		16.05	-0.85396
16.1	2.23291	2.62964	1.98877	2.23291	0.34082	1.31739	-1.33764	-2.6499	-5.12182	-5.76269	-2.92456	-2.10058	-1.67334	-1.24609		16.1	0.96681	1.27199	0.81422	-0.22337	0.99733	0.99733	1.02785	0.78371	0.90578	-0.22337	1.05836	0.63112	0.23439	-0.89476		16.1	1.47269	1.53372	1.69241	1.57034	0.91116	0.2886	-0.12643	0.33743	-0.71237	0.00784	-0.4072	-0.30954	0.12991	0.06888		16.1	-0.51821
16.15	1.89712	2.87368	1.68349	2.87368	-0.30015	1.68349	-1.58189	-3.10777	-4.57261	-5.88487	-2.49741	-2.43638	-1.88706	-1.06309		16.15	0.90578	0.84474	0.35646	-0.37596	1.02785	0.69215	1.08888	0.6006	1.08888	-0.04027	1.21095	0.11232	0.23439	-0.6201		16.15	0.50823	1.94866	1.36272	1.50921	1.143	0.93548	0.00774	0.25188	-0.73688	-0.71247	-0.57819	-0.16315	0.08099	0.01995		16.15	-0.64023
16.2	1.83598	1.77494	1.95805	2.35477	0.18803	1.80546	-1.27682	-3.56564	-4.60323	-5.85445	-2.16183	-2.52804	-1.30733	-0.69698		16.2	0.99733	0.81422	0.17336	-0.46751	0.75319	0.53957	1.1194	0.75319	1.45509	-0.16234	0.96681	-0.19286	0.14284	-0.25389		16.2	0.01985	1.70442	1.76546	1.76546	1.63118	1.09407	0.25179	0.20296	-1.24968	-0.09001	-0.0778	0.14192	0.54476	0.6302		16.2	-0.91483
16.25	1.56121	1.53069	1.43914	2.4157	0.03533	2.14105	-1.73469	-3.59626	-4.29816	-6.00715	-2.34504	-2.52814	-0.45295	-0.63605		16.25	0.72267	0.84474	-0.00975	-0.52855	0.84474	0.14284	1.05836	0.63112	1.33302	0.0818	1.02785	-0.1013	0.11232	0.47853		16.25	-0.67604	2.04612	1.69212	1.92405	0.66673	1.42356	-0.38308	-0.33425	-1.72585	0.06858	-0.17556	0.14183	0.08079	0.64231		16.25	-1.3115
16.3	1.65266	1.16438	2.04939	1.83577	0.6761	2.23249	-1.00237	-3.35222	-3.74895	-5.2138	-2.28411	-2.55877	-0.33098	-0.78875		16.3	0.72267	1.1194	0.23439	-0.22337	0.96681	0.17336	0.93629	0.81422	1.05836	0.02077	0.96681	0.0818	-0.1013	0.63112		16.3	-0.16345	1.50892	2.13147	1.83851	0.19056	1.06946	-0.01696	-0.49304	-1.6405	0.49573	-0.02917	0.81312	0.59339	0.41028		16.3	-1.46404
16.35	1.28634	2.17135	2.0798	1.34738	0.49289	1.77462	-0.11746	-3.16922	-3.59647	-4.23734	-2.07059	-2.31473	-0.51419	-0.1785		16.35	0.47853	1.1194	0.11232	-0.07079	1.18044	0.11232	1.24147	0.50905	0.81422	0.29543	1.21095	0.63112	0.14284	0.66164		16.35	-0.28561	1.89944	2.29007	2.09476	-0.20017	1.26468	-0.24899	-0.38327	-1.45749	0.03177	-0.10251	0.91067	0.36136	0.17825		16.35	-1.43347
16.4	1.5609	2.23228	3.02574	1.68297	0.58434	1.5609	0.15709	-2.80312	-3.77968	-3.77968	-1.76552	-1.94862	-1.09413	0.0045		16.4	0.47853	0.81422	0.17336	0.17336	1.1194	0.29543	1.36354	0.47853	0.57008	0.57008	1.02785	0.75319	0.23439	0.23439		16.4	0.20257	1.93597	2.58294	2.11907	0.33685	1.1303	0.31243	-0.63972	-0.23688	-0.32233	0.4345	1.08148	0.87396	-0.17585		16.4	-1.03669
16.45	1.13355	2.87305	2.84253	1.4082	0.0044	1.34717	0.12647	-2.65063	-3.99341	-3.68823	-1.67407	-2.2539	-1.67407	0.09595		16.45	0.29543	0.50905	-0.04027	0.0818	1.24147	0.20387	1.8213	0.26491	0.75319	0.72267	0.93629	0.99733	0.6006	0.05128		16.45	-0.37126	2.10677	2.59505	1.74056	0.53206	1.09358	0.31233	-0.17595	-0.12712	0.05599	0.49544	0.33675	1.00813	0.2513		16.45	-0.67042
16.5	0.98085	2.99501	2.32363	2.41518	0.03481	1.5912	-0.48399	-2.65074	-4.20714	-3.963	-2.46763	-1.8878	-1.82676	-0.11778		16.5	0.63112	0.05128	0.02077	0.0818	1.33302	0.11232	1.60768	0.35646	0.72267	0.75319	0.53957	0.6006	0.50905	-0.28441		16.5	-0.49343	1.86253	2.64378	1.66722	0.73948	1.22776	0.48314	-0.21267	0.38548	-0.12722	0.11692	-0.20046	0.98362	-0.12722		16.5	-0.5483
16.55	0.33988	3.42215	1.92679	2.20145	0.18729	1.01126	-0.85031	-2.10153	-4.29879	-3.87155	-3.35275	-1.61325	-2.04049	-0.54513		16.55	1.02785	0.26491	-0.00975	-0.1013	1.24147	0.05128	1.51613	0.14284	0.87526	0.35646	0.47853	0.44801	0.53957	-0.65062		16.55	-0.29821	1.56946	3.0221	1.1178	1.31312	1.22767	0.11683	0.60511	0.32435	0.66614	0.45862	-0.1029	0.65394	-0.23718		16.55	-0.54824
16.6	0.79754	2.9948	2.07928	2.476	0.15667	0.58391	-0.88093	-2.37629	-4.08528	-3.2613	-3.93269	-1.33869	-2.16267	-0.36213		16.6	1.21095	0.44801	-0.16234	-0.13182	1.14992	0.14284	1.08888	0.32594	0.35646	0.20387	0.38698	0.26491	0.35646	-1.10838		16.6	0.05569	1.2764	2.42386	1.66702	1.03226	1.37405	-0.2739	0.5928	0.11673	0.5928	0.33646	-0.56686	-0.46921	-0.88425		16.6	-0.45664
16.65	0.70588	2.75056	2.659	2.17072	1.16364	0.46174	-1.03362	-2.59002	-4.23797	-2.89519	-4.299	-0.51482	-1.70501	-0.82		16.65	1.05836	0.81422	0.02077	-0.1013	0.87526	0.47853	0.93629	0.50905	0.29543	-0.13182	0.14284	0.02077	0.11232	-1.62718		16.65	0.44622	0.71478	2.46038	1.67913	1.31292	0.91009	-0.05427	0.51946	0.09222	1.31292	0.53167	-0.6402	-0.48151	-0.37165		16.65	-0.42607
16.7	1.28561	2.29269	2.68942	1.86544	1.37716	0.33956	-1.18632	-2.3765	-4.81791	-3.0784	-3.71927	-0.69803	-1.46097	-1.1558		16.7	0.50905	0.6006	-0.04027	-0.22337	0.87526	0.75319	0.72267	0.75319	0.26491	0.11232	0.05128	-0.00975	0.0818	-1.68822		16.7	0.07991	1.14192	1.9598	1.92318	0.90999	1.17855	-0.39616	0.90999	-0.65251	1.11751	0.25081	-0.94548	-0.83561	-0.42058		16.7	-0.76171
16.75	1.01084	2.78086	2.96397	2.3231	1.89585	1.04136	-2.04091	-2.0104	-4.42128	-3.4142	-3.59731	-1.21694	-1.33901	-0.88125		16.75	0.53957	0.35646	0.26491	0.02077	0.69215	1.1194	0.6006	0.81422	0.35646	0.23439	-0.00975	-0.1013	-0.04027	-1.90184		16.75	-0.04225	1.01976	2.08177	1.80101	1.01976	1.03196	-0.26198	0.88548	-0.22536	0.73899	0.15306	-0.33522	0.03099	-0.06667		16.75	-0.94476
16.8	0.67505	2.20093	3.0249	2.47558	1.01074	1.01074	-2.07154	-2.16309	-3.90259	-3.68897	-3.01758	-1.64429	-1.15601	-0.7898		16.8	0.44801	0.0818	0.23439	0.14284	0.84474	1.05836	0.81422	1.08888	0.38698	0.4175	0.20387	0.35646	0.02077	-2.02391		16.8	-0.95788	1.56898	2.20374	1.69105	0.95862	1.20276	-0.27429	0.86097	-0.23766	0.15296	-0.45739	-0.06677	0.10413	-0.18884		16.8	-1.31092
16.85	0.21718	2.13978	3.29945	3.14686	0.85805	1.43788	-2.04112	-1.94957	-3.84166	-4.11632	-2.77354	-1.85802	-1.33922	-0.54576		16.85	0.6006	-0.07079	0.47853	0.4175	0.84474	1.02785	0.78371	1.1194	0.4175	0.11232	0.23439	0.53957	-0.34544	-2.26805		16.85	-0.78708	2.16702	2.24026	2.06937	0.87308	1.44681	0.17728	0.03079	0.58011	-0.26218	-0.68942	0.44583	0.48245	0.20169		16.85	-1.49397
16.9	0.64432	1.52933	3.32986	2.1702	1.01053	0.58328	-1.79709	-2.07175	-4.26901	-3.65866	-2.80417	-1.91916	-1.09518	-0.39328		16.9	0.38698	0.14284	0.35646	0.17336	0.96681	0.81422	1.08888	1.18044	0.66164	-0.31493	0.35646	0.75319	-0.28441	-2.1765		16.9	-0.39655	2.65521	2.77728	2.05706	1.14153	1.04388	0.54339	0.11614	0.34808	-0.17682	-0.68952	0.17718	-0.25007	0.0307		16.9	-1.86012
16.95	0.82732	1.52922	3.66545	2.872	1.07146	1.04094	-2.83479	-2.37703	-3.84187	-3.201	-2.59065	-1.79719	-1.06477	-0.30183		16.95	0.32594	-0.04027	0.20387	0.17336	1.14992	0.63112	1.1194	1.08888	0.63112	-0.34544	0.32594	0.44801	-0.25389	-1.8408		16.95	-0.32341	2.74056	2.52083	2.60628	0.94612	1.37337	0.44564	0.2015	0.10384	-0.60417	-0.21354	0.82405	-0.25017	0.2137		16.95	-1.95162
17	1.4986	0.88825	3.26862	2.68879	1.25446	1.13239	-3.20111	-2.65179	-3.62835	-2.40765	-3.018	-1.88885	-1.30902	-0.08831		17	0.26491	0.17336	0.26491	0.32594	0.96681	0.47853	1.21095	1.14992	0.93629	-0.40648	0.32594	0.4175	-0.00975	-1.62718		17	-0.45778	1.82493	3.27757	2.02025	1.92259	1.12913	0.32347	0.93382	-0.21364	-0.12819	0.22581	1.04368	-0.54323	0.16478		17	-1.55484
17.05	1.19332	1.28487	3.08541	3.60421	0.91866	2.01729	-4.14726	-3.10966	-3.20121	-1.6143	-3.38432	-1.76689	-1.24809	-0.11894		17.05	0.11232	0.0818	0.32594	0.6006	0.81422	0.44801	0.99733	0.90578	0.81422	-0.07079	0.47853	0.47853	0.14284	-1.23045		17.05	-0.73864	1.67835	2.83802	2.08118	1.87366	1.66614	-0.06725	1.08021	-0.48229	-0.21374	0.48206	0.93372	0.0304	0.59193		17.05	-1.24961
17.1	1.49839	1.65098	2.74961	3.05479	1.40684	1.62046	-3.78115	-3.32339	-2.77407	-1.58388	-3.07925	-1.46181	-1.00405	-0.24111		17.1	0.32594	0.14284	0.50905	0.96681	0.57008	0.84474	0.72267	0.90578	0.93629	-0.28441	0.44801	0.4175	0.0818	-1.32201		17.1	0.12796	1.27542	2.53275	2.04446	2.32523	1.22659	0.11575	0.7139	-0.06735	0.53079	0.81155	0.32327	-0.07956	0.12796		17.1	-0.82231
17.15	1.13207	2.87158	3.17675	2.78002	1.40673	1.07104	-4.2085	-3.56763	-2.89625	-2.07227	-2.43848	-1.58399	-0.82105	-0.05811		17.15	0.23439	0.14284	0.0818	0.69215	0.81422	0.96681	0.69215	1.02785	0.87526	-0.19286	0.44801	0.4175	0.29543	-1.23045		17.15	0.31097	2.0932	2.58148	2.38616	1.84905	1.12884	-0.25056	0.65277	-0.38483	0.60394	0.46966	0.3598	0.46966	0.09124		17.15	-0.73071
17.2	1.74232	2.84095	2.7494	1.92543	1.86439	1.49818	-3.47619	-3.3236	-3.29308	-2.43859	-2.56066	-1.15685	-0.51598	-0.14977		17.2	0.35646	0.35646	0.02077	0.4175	0.90578	0.96681	0.44801	1.1194	0.72267	-0.25389	0.17336	0.29543	0.26491	-1.41356		17.2	0.82357	2.31282	2.32503	3.44808	1.62923	0.83577	-0.39714	0.1888	-0.32389	1.15316	0.09114	-0.01872	0.3597	-0.507		17.2	-0.73065
17.25	1.55911	2.62722	2.50515	1.92532	1.1929	0.91824	-3.6594	-3.3237	-3.26267	-1.61472	-2.95749	-1.03488	-0.82126	-0.5466		17.25	0.26491	0.75319	-0.07079	-0.1013	0.90578	0.6006	0.50905	1.02785	0.57008	-0.16234	0.14284	0.72267	0.53957	-1.35252		17.25	0.81126	2.6057	3.10618	3.57005	1.60472	0.77464	-0.8611	0.0056	-0.71462	0.71361	-0.06764	0.32298	0.33519	-0.27516		17.25	-0.60853
17.3	1.74211	1.77263	1.43693	1.77263	1.00969	1.62004	-3.26277	-3.04915	-3.50691	-1.27913	-3.62898	-1.15706	-1.95052	-0.60774		17.3	0.38698	0.72267	0.17336	-0.46751	1.1194	0.20387	0.44801	0.75319	0.11232	0.26491	0.05128	0.93629	0.50905	-1.23045		17.3	0.90882	2.31263	3.05726	3.59437	1.47034	0.94544	-0.49499	-0.09216	-0.26305	0.59144	0.18861	0.06654	-0.17761	-0.5072		17.3	-0.60848
17.35	1.52838	1.80304	1.742	1.86408	1.43683	0.67389	-2.80511	-3.17132	-3.69012	-0.94354	-3.50702	-1.37079	-2.04217	-1.37079		17.35	0.4175	0.53957	0.44801	-0.55907	1.33302	0.17336	0.90578	0.4175	-0.04027	0.50905	0.14284	1.02785	0.29543	-1.47459		17.35	1.03079	1.59232	2.82523	2.80081	1.9097	0.93314	-0.05563	0.61575	-0.66598	-0.18991	0.28616	0.71341	-0.18991	0.09085		17.35	-0.33376
17.4	1.68086	1.92501	1.52828	2.07759	1.86397	1.10103	-2.92729	-3.47661	-4.5142	-0.82158	-3.87333	-1.40141	-1.98124	-1.24882		17.4	0.44801	0.05128	0.44801	-0.46751	1.57716	0.14284	1.08888	-0.19286	-0.40648	0.90578	0.44801	1.05836	0.14284	-1.6577		17.4	1.05511	1.3847	2.55657	2.98382	1.83636	1.34808	0.62786	0.164	-0.14118	-0.01911	0.3471	0.32269	-0.28766	-0.26325		17.4	-0.24216
17.45	1.74179	2.71836	1.31455	2.47422	2.6268	1.16196	-2.25601	-3.84292	-5.03311	-1.24893	-4.05654	-1.95083	-1.30996	-0.91323		17.45	0.63112	0.17336	0.57008	-0.22337	1.39406	0.35646	0.96681	-0.07079	-0.25389	0.69215	0.32594	0.81422	-0.25389	-2.32909		17.45	1.40902	0.78646	2.19027	2.47103	2.33675	1.16488	0.3348	0.27376	0.24935	-0.12907	0.3348	0.49349	0.42025	-0.43425		17.45	-0.39469
17.5	1.46703	2.53515	1.16186	2.77929	2.35204	1.406	-2.59181	-3.90406	-5.12476	-2.01197	-3.14112	-2.31715	-0.48609	-0.54713		17.5	0.57008	0.47853	0.50905	-0.22337	1.27199	0.4175	0.84474	0.14284	-0.1013	0.72267	0.32594	0.84474	-0.22337	-2.57323		17.5	1.12816	1.3723	2.73948	2.67845	2.16575	1.01829	0.18821	0.24925	0.72532	0.37132	0.48118	0.04173	0.34691	-1.2278		17.5	-0.57774
17.55	1.52796	2.44349	1.61951	3.23695	2.35194	1.28382	-1.61535	-3.41589	-4.60607	-2.77502	-3.08019	-1.95104	-0.54723	0.0326		17.55	0.75319	0.66164	0.66164	-0.19286	1.05836	0.69215	0.69215	0.69215	0.14284	0.47853	0.11232	0.63112	-0.25389	-2.66478		17.55	1.56751	1.61634	2.38538	2.53187	2.82484	0.73743	-0.03161	1.0304	0.31019	-0.20251	0.68861	0.04163	0.76185	-1.09362		17.55	-0.91338
17.6	1.07009	1.80251	2.2908	3.02322	1.16165	0.67336	-1.79856	-3.47703	-4.301	-3.5991	-2.95823	-1.43235	-1.06614	0.33767		17.6	0.81422	0.72267	0.87526	-0.25389	0.78371	0.87526	0.99733	0.84474	0.35646	0.26491	0.20387	0.6006	0.02077	-2.60374		17.6	1.189	2.44632	2.50736	2.84915	2.36087	1.14017	0.37113	0.66409	0.13919	-0.21481	0.34671	-0.12936	0.16361	-1.13034		17.6	-1.24902
17.65	1.77189	1.80241	2.4738	2.74845	1.13102	1.13102	-1.82918	-2.5616	-3.87386	-3.53817	-3.20247	-1.21883	-0.91365	-0.02864		17.65	0.78371	0.29543	0.84474	-0.22337	0.78371	0.93629	1.05836	0.99733	0.26491	0.23439	0.23439	0.57008	0.23439	-2.29857		17.65	1.61615	2.11663	2.01898	2.37298	2.38519	0.81048	-0.00739	0.54193	-0.14167	-0.36139	0.59076	0.24896	0.85931	-0.43464		17.65	-1.34052
17.7	1.64972	2.04645	2.90094	1.68023	0.70367	1.00885	-1.70722	-2.56171	-4.39276	-3.32465	-3.32465	-0.85272	-1.12738	-0.02875		17.7	0.69215	0.23439	0.78371	0.35646	0.6006	1.08888	1.14992	0.87526	0.6006	0.05128	0.14284	0.47853	0.20387	-2.14598		17.7	1.72591	1.94564	1.77474	2.31185	1.67708	0.95687	0.01693	-0.44694	-0.08073	0.38314	0.39534	-0.32487	0.67611	0.06575		17.7	-1.2184
17.75	2.16841	2.10737	3.08394	1.86323	1.61909	1.86323	-2.13457	-2.28716	-4.30132	-3.62993	-2.89751	-0.94438	-1.37163	0.00166		17.75	0.47853	0.38698	0.66164	0.72267	0.63112	0.84474	1.27199	0.78371	0.72267	0.17336	0.4175	0.53957	0.29543	-1.77977		17.75	1.96995	1.33519	1.8723	1.82347	2.0432	0.73704	-0.17848	-0.25173	0.02904	-0.17848	0.4929	-0.386	0.99339	0.43187		17.75	-0.94369
17.8	1.58847	2.04623	3.05331	1.58847	1.31381	1.58847	-1.4938	-3.01968	-5.27798	-3.14175	-2.50088	-1.37173	-1.18863	-0.05948		17.8	0.50905	0.66164	0.81422	0.96681	0.47853	0.87526	1.18044	0.75319	0.96681	0.02077	0.35646	0.53957	0.32594	-1.59666		17.8	1.18861	1.71351	2.10413	1.92103	1.96986	1.01771	0.40736	-0.30065	0.27308	-0.19079	0.04115	-0.23962	0.37074	0.23646		17.8	-0.63846
17.85	1.86302	1.74095	2.41234	2.19872	2.01561	2.07665	-1.37184	-3.386	-4.85084	-3.32496	-2.77565	-1.46339	-1.06666	0.4287		17.85	0.50905	0.75319	0.81422	0.78371	0.32594	0.75319	1.27199	0.63112	1.05836	0.05128	0.4175	0.53957	0.53957	-1.35252		17.85	0.93216	1.81107	2.98294	2.06741	2.15286	1.02982	0.46829	0.56595	0.00443	-0.45944	0.57816	0.37064	-0.0444	0.02884		17.85	-0.82151
17.9	1.67981	2.47327	2.80896	2.07654	1.43567	1.25257	-0.4259	-3.56921	-5.12561	-2.80627	-2.74523	-1.49401	-1.49401	-0.09021		17.9	0.72267	0.4175	0.66164	0.38698	0.38698	0.47853	1.18044	0.96681	0.78371	0.23439	0.23439	0.50905	0.53957	-1.04735		17.9	0.60247	2.14056	2.95843	2.65325	2.10394	1.54241	0.56585	0.8222	-0.20319	-0.23981	0.4804	0.43158	-0.52057	0.11419		17.9	-0.76042
17.95	1.89333	2.83938	2.5342	2.74782	1.46609	1.28298	-0.88377	-3.59983	-4.21018	-3.29466	-3.32517	-2.10447	-1.76878	-0.70066		17.95	0.87526	0.20387	0.57008	0.02077	0.4175	0.29543	1.24147	0.90578	0.63112	0.05128	-0.00975	0.32594	0.20387	-1.07787		17.95	1.07845	1.95736	3.5931	2.66536	2.32357	1.65218	0.1263	1.17611	-0.08122	-0.0446	0.60238	0.57796	-0.43522	0.02864		17.95	-0.88244
18	1.98478	3.81583	2.16788	2.5341	0.36735	0.64201	-0.5787	-2.62337	-4.48495	-3.5389	-3.75253	-2.13509	-2.01302	-0.45663		18	0.57008	0.11232	0.29543	-0.68114	0.50905	-0.04027	1.36354	0.81422	0.6006	-0.13182	-0.04027	0.4175	-0.1013	-0.89476		18	1.12718	1.90843	3.33665	2.48216	2.18919	1.90843	0.26048	1.00511	0.114	0.15062	0.37034	0.57786	-0.06911	0.13841		18	-1.00445
18.05	1.80157	4.05987	1.3438	3.02227	0.76397	1.19122	-0.67036	-2.56245	-4.08832	-4.45454	-3.6916	-1.79951	-1.98261	-0.21259		18.05	0.38698	0.0818	0.23439	-0.80321	0.44801	0.17336	1.21095	0.32594	0.81422	-0.437	-0.25389	0.38698	-0.55907	-0.92528		18.05	0.9806	1.28577	3.25111	2.57972	2.33558	1.56654	-0.03258	1.04163	0.00404	0.06507	0.37025	0.58997	-0.09362	-0.11803		18.05	-0.94337
18.1	2.10664	4.39546	1.58784	2.35078	1.06904	1.37422	-0.2127	-1.9522	-4.02739	-4.51567	-3.90532	-1.4334	-1.6165	0.03144		18.1	0.23439	0.23439	0.20387	-0.68114	0.29543	0.4175	1.08888	0.29543	1.02785	-0.31493	-0.04027	0.44801	-0.58958	-1.01683		18.1	0.56546	1.13919	2.543	3.08011	1.95706	1.22464	0.05277	1.18802	-0.25241	-0.42331	-0.00827	0.40677	0.37015	0.04056		18.1	-1.00435
18.15	1.43515	3.57138	1.89291	2.07602	1.5267	1.86239	-0.09073	-2.74576	-3.90543	-4.57681	-3.6918	-0.88419	-1.31143	0.27548		18.15	0.29543	0.20387	0.0818	-0.55907	0.29543	0.69215	0.87526	0.14284	1.21095	-0.00975	0.05128	0.47853	-0.25389	-1.1389		18.15	0.88275	0.99261	1.8471	2.82367	1.94476	1.22454	0.05267	1.10247	-0.10602	-0.37458	-0.09381	-0.46003	0.2846	0.02826		18.15	-0.51601
18.2	1.77074	3.20506	2.07591	1.77074	1.67918	1.31297	0.06175	-2.71535	-2.83742	-4.24123	-3.90553	-0.64015	-1.00636	0.36693		18.2	0.35646	0.6006	0.44801	-0.28441	-0.00975	0.75319	0.66164	0.29543	1.30251	0.05128	0.14284	0.29543	-0.04027	-1.35252		18.2	1.07796	1.55404	1.81038	2.67708	1.71273	1.12679	0.46761	1.09017	-0.11833	-0.61882	-0.28923	-0.47233	0.61409	0.32113		18.2	-0.14975
18.25	1.25183	2.83875	2.04529	1.95374	2.25891	1.61804	0.03113	-2.50183	-2.86804	-4.51599	-3.23425	-1.03699	-0.30457	-0.39612		18.25	0.0818	0.99733	0.47853	-0.37596	-0.07079	0.6006	0.72267	0.50905	0.84474	-0.04027	0.14284	0.53957	0.20387	-1.32201		18.25	1.00462	2.32298	1.67601	1.95677	2.23753	1.32201	0.16234	0.7849	0.58958	-0.66774	-0.2527	-0.24049	-0.0818	0.05247		18.25	-0.05814
18.3	1.74001	2.25881	2.65554	2.10622	2.31984	0.91603	-0.1826	-3.02073	-1.86107	-4.57713	-2.4409	-1.34227	-0.1826	-0.45726		18.3	0.11232	0.96681	0.63112	-0.13182	0.05128	0.69215	0.66164	0.44801	0.4175	-0.40648	-0.1013	0.6006	-0.04027	-1.1389		18.3	0.67494	3.07972	2.18861	2.31068	2.73792	1.1266	0.00355	1.02894	0.54066	-0.88756	-0.10631	0.71156	0.12562	0.30872		18.3	-0.11912
18.35	1.77042	2.04508	2.7775	1.83146	2.38077	1.12955	0.33609	-3.50912	-2.56308	-4.79086	-2.07479	-1.95272	-0.54892	-0.42684		18.35	0.29543	1.1194	0.66164	-0.04027	0.4175	0.50905	0.81422	0.72267	0.35646	-0.52855	-0.28441	0.50905	-0.46751	-1.07787		18.35	0.79691	3.44583	2.0054	1.85892	3.01859	1.56595	-0.64352	0.90677	0.93119	-0.33835	-0.36276	0.67484	-0.14303	0.27201		18.35	-0.42425
18.4	1.7398	1.58721	2.80791	2.16704	2.28911	0.39702	0.48858	-3.99751	-2.89887	-4.82148	-2.0749	-2.0749	-0.97627	-0.54902		18.4	0.53957	0.99733	0.6006	-0.04027	0.84474	0.4175	0.81422	0.69215	0.29543	-0.22337	-0.40648	0.4175	-0.49803	-0.89476		18.4	1.06537	3.71429	2.38372	2.12738	2.6889	1.13861	-0.68024	1.02874	0.34515	-0.19196	-0.37506	0.83343	-0.30182	0.34515		18.4	-0.42419
18.45	2.31953	2.35004	2.56367	1.9228	2.53315	0.7021	0.58002	-3.57037	-3.75347	-4.57745	-2.56328	-1.92242	-1.12896	-0.64068		18.45	0.84474	1.08888	0.81422	-0.04027	0.81422	0.44801	0.69215	0.81422	0.53957	-0.16234	-0.6201	0.20387	-0.80321	-1.04735		18.45	1.52913	3.3846	1.79769	2.11507	2.87191	1.10189	-0.69254	0.32064	0.21078	0.18636	-0.66813	0.38167	-0.6193	0.2474		18.45	-0.45466
18.5	2.34994	2.01425	2.41097	1.98373	2.38046	0.39681	-0.21354	-3.50944	-3.66202	-5.1879	-1.86149	-2.47184	-1.09855	-0.57975		18.5	0.50905	0.96681	0.75319	-0.437	0.90578	0.44801	0.81422	0.6006	0.53957	-0.04027	-0.40648	0.17336	-0.98631	-1.16942		18.5	1.65111	2.63988	1.93187	2.95726	2.82298	0.57689	-0.71706	0.2473	-0.21657	-0.05788	-0.60719	0.52806	-0.71706	0.39378		18.5	-0.51564
18.55	2.89915	2.53294	2.41087	1.52586	2.25828	1.15965	-0.09157	-3.02126	-3.41799	-4.79128	-2.59401	-2.41091	-0.94606	-0.73244		18.55	0.38698	0.53957	0.84474	-0.58958	0.93629	0.78371	0.72267	0.32594	0.53957	-0.13182	-0.13182	0.02077	-1.16942	-1.1389		18.55	1.26038	2.00501	1.72425	2.89613	2.5055	0.63783	-0.59508	-0.05797	0.18617	-0.25329	-0.6195	0.35706	-0.65612	0.80872		18.55	-0.27144
18.6	2.62439	2.6549	2.16662	1.64782	1.89196	1.28161	-0.21375	-3.05188	-3.81482	-5.1576	-2.80774	-2.80774	-0.88513	-1.25135		18.6	0.26491	0.32594	0.93629	-0.58958	0.87526	1.33302	0.81422	0.05128	0.81422	-0.22337	0.26491	-0.07079	-1.26097	-1.23045		18.6	1.26029	1.49222	1.89505	3.26224	2.34671	0.418	-0.65622	0.45462	0.32035	-0.47311	-0.16793	0.064	-0.88815	1.05277		18.6	-0.1188
18.65	2.71583	3.05153	2.89894	1.0984	1.34254	1.58668	-0.1223	-2.07542	-3.14354	-4.69994	-4.02855	-3.20457	-1.6787	-0.54955		18.65	0.44801	0.11232	0.75319	-0.6201	0.81422	1.60768	0.66164	-0.1013	0.81422	-0.28441	0.63112	0.02077	-0.77269	-1.1389		18.65	1.05267	1.89496	1.72406	2.89593	1.85833	0.73529	-0.13141	0.50335	0.62542	-0.74176	-0.49762	0.27142	-0.57086	1.05267		18.65	-0.30185
18.7	2.25797	3.02091	2.74625	1.22037	1.22037	1.03726	-0.03085	-2.13657	-3.35727	-4.39487	-3.57089	-4.02865	-1.58725	-0.67172		18.7	0.87526	0.11232	0.75319	-0.49803	0.75319	1.72975	0.38698	0.0818	1.21095	-0.68114	0.6006	0.02077	-0.46751	-1.19994		18.7	0.95492	1.93148	1.89486	2.87142	1.71175	0.85726	0.00277	0.43001	0.34456	-0.4611	-0.61979	0.27132	-0.65641	0.27132		18.7	-0.36284
18.75	1.9832	2.25786	3.05132	0.91509	1.12871	0.97612	-0.61079	-1.83149	-2.80806	-4.24238	-3.2353	-3.54048	-1.86201	-0.977		18.75	0.90578	0.0818	0.90578	-0.6201	0.96681	1.39406	0.29543	-0.22337	1.36354	-0.80321	0.72267	0.05128	-0.19286	-1.41356		18.75	0.60081	2.27318	1.56517	2.56615	1.28441	0.94261	0.56419	-0.14381	-0.33913	-0.31471	-0.79079	0.68626	-0.20485	0.21019		18.75	-0.63744
18.8	1.61689	1.86103	2.77655	1.6474	1.76947	0.88446	-1.70953	-2.3504	-3.84576	-3.63214	-3.9068	-3.72369	-1.70953	-0.794		18.8	0.81422	-0.22337	0.93629	-0.92528	1.1194	1.02785	0.20387	-0.19286	1.18044	-0.86424	0.50905	0.11232	-0.25389	-1.23045		18.8	1.40638	2.10218	1.88246	1.71156	1.67494	0.63734	0.06361	-0.05846	-0.86413	-0.02184	-0.92516	0.28333	-0.22936	0.12464		18.8	-0.57635
18.85	0.85384	1.6473	3.2037	2.07454	2.04403	1.40316	-2.62516	-1.77067	-3.84586	-3.69328	-3.63224	-3.23551	-1.09928	-0.36686		18.85	0.53957	-0.22337	0.87526	-1.23045	0.93629	0.84474	0.32594	-0.22337	0.93629	-1.07787	0.26491	-0.13182	-0.34544	-1.29149		18.85	1.19876	2.63919	1.94339	1.28421	1.74808	0.33207	0.17337	0.38089	-1.23043	-0.22946	-0.46139	0.3931	0.21	0.2222		18.85	-0.39319
18.9	0.73167	2.77634	2.98997	2.47117	2.80686	1.67771	-2.59475	-1.89284	-4.36477	-3.32717	-3.87649	-3.66286	-1.06887	-0.36697		18.9	0.20387	-0.07079	0.75319	-1.38304	0.93629	0.50905	0.63112	-0.28441	0.53957	-1.01683	0.29543	-0.13182	-0.437	-1.16942		18.9	1.47943	2.57806	2.43158	0.9057	2.41937	0.44183	-0.16852	0.51507	-0.4859	0.13666	-0.19293	0.08783	0.19769	0.44183		18.9	-0.60676
18.95	0.09069	3.08141	2.68469	2.41003	2.16589	1.52502	-2.3202	-1.2826	-4.48694	-3.96814	-3.26624	-3.38831	-0.12293	-0.03138		18.95	0.20387	-0.07079	0.63112	-1.07787	1.14992	0.44801	0.84474	-0.37596	0.4175	-0.86424	0.23439	0.0818	-0.46751	-1.35252		18.95	1.10091	2.71224	1.95541	1.58919	2.83431	0.13656	-0.02213	0.71029	0.01449	0.45394	0.25863	0.18538	0.23421	0.12435		18.95	-0.60671
19	0.4568	3.78321	2.34889	1.79957	2.25734	1.4944	-2.1372	-1.92357	-4.30394	-3.44945	-3.08324	-3.78515	-0.45873	-0.09252		19	0.38698	0.05128	0.53957	-0.55907	1.24147	0.57008	1.45509	-0.46751	0.35646	-0.46751	0.26491	0.11232	-0.58958	-1.90184		19	1.08861	2.50462	2.08958	1.86986	3.18822	0.50267	-0.18092	0.31956	0.51488	1.13744	0.06322	0.12425	0.49046	0.27074		19	-0.5151
19.05	0.27359	3.56949	1.82998	1.76895	1.25015	1.37222	-2.10678	-1.31333	-3.54111	-3.358	-3.63266	-3.11386	-0.3978	-0.24521		19.05	0.44801	0.02077	0.17336	-0.52855	1.21095	0.66164	1.97389	-0.19286	0.29543	-0.16234	0.23439	0.26491	-0.74217	-2.1765		19.05	0.61244	2.46791	1.69886	2.49232	3.16371	0.84437	0.0265	0.34388	0.2096	1.11292	-0.04674	-0.38854	0.14857	-0.08336		19.05	-0.45401
19.1	0.27348	3.02006	2.10454	1.73833	0.70073	1.28056	-2.10689	-2.19844	-3.08345	-2.80879	-3.48018	-3.175	-1.28291	0.09038		19.1	0.63112	0.02077	0.11232	-0.68114	0.87526	0.90578	1.85182	-0.16234	0.63112	-0.19286	0.0818	0.14284	-1.1389	-2.05443		19.1	0.49027	2.2847	2.2725	2.00394	2.65091	1.57669	0.46585	0.29496	-0.38864	0.47806	-0.33981	-0.16891	0.23392	0.27054		19.1	-0.54551
19.15	0.51752	3.01996	2.13495	2.16547	-0.36749	0.85321	-2.13751	-2.07648	-2.992	-2.83942	-3.75494	-2.62579	-1.40509	-0.52008		19.15	0.72267	0.20387	0.05128	-1.10838	0.53957	0.90578	1.60768	-0.04027	0.87526	-0.19286	0.26491	0.0818	-1.26097	-1.81029		19.15	0.57562	1.7475	2.29681	2.15033	2.35785	1.5766	0.14837	0.66107	-0.76715	0.11175	-0.40094	0.0263	-0.13239	0.13617		19.15	-0.75908
19.2	0.79207	2.53157	2.89778	1.86019	-0.33708	1.52449	-1.80192	-2.59538	-3.48039	-2.6259	-3.41935	-2.809	-1.92399	-0.3676		19.2	1.02785	0.26491	-0.40648	-1.47459	0.6006	0.96681	1.27199	-0.19286	0.69215	-0.31493	0.38698	0.32594	-0.86424	-1.26097		19.2	0.30697	2.08919	2.76058	2.01595	1.79623	1.52767	0.11166	0.38021	-1.35319	-0.14469	-0.16911	0.68539	0.17269	0.12386		19.2	-0.66748
19.25	1.86008	2.50095	2.80613	1.8906	0.24265	1.76853	-1.80203	-2.53445	-3.72464	-2.35135	-2.50393	-2.77859	-1.22219	-1.03909		19.25	1.27199	0.57008	-0.28441	-1.29149	0.50905	0.81422	0.87526	-0.34544	0.6006	-0.46751	0.29543	0.26491	-0.58958	-0.92528		19.25	0.7097	2.2722	2.36986	2.21117	1.95482	0.91722	-0.48659	0.22142	-1.18239	0.23363	-0.03493	0.39232	0.25804	0.61205		19.25	-0.48432
19.3	1.98205	1.73791	2.2567	1.40221	0.42565	1.89049	-1.61903	-3.17542	-3.81629	-2.16834	-2.50404	-2.38197	-1.19178	-1.00868		19.3	0.87526	0.81422	-0.16234	-1.1389	0.50905	0.57008	0.75319	-0.16234	0.53957	-0.25389	0.4175	0.02077	-0.25389	-0.9558		19.3	0.55091	2.65052	2.45521	2.2721	1.5763	0.38001	-0.07165	0.22132	-1.18249	0.20912	0.42884	-0.31579	-0.08385	0.74623		19.3	-0.5453
19.35	2.40919	1.37159	1.92091	1.12745	0.63917	1.46314	-1.83276	-3.14501	-3.8164	-1.58862	-2.38207	-2.50414	-0.94775	-1.25292		19.35	0.29543	0.69215	0.32594	-0.89476	0.63112	0.4175	0.47853	-0.16234	0.44801	-0.13182	0.63112	-0.1013	-0.04027	-0.9558		19.35	0.99027	1.96683	1.66166	2.35746	1.80814	0.27005	-0.15719	0.36771	-0.66989	0.40433	0.23343	-0.76754	-0.46237	0.77054		19.35	-0.39266
19.4	2.4396	1.49355	1.49355	0.94424	0.24233	1.52407	-1.83286	-3.1146	-3.96909	-1.5582	-2.87046	-2.19907	-0.8563	-0.58164		19.4	-0.13182	0.53957	0.84474	-0.74217	0.69215	0.47853	0.38698	-0.07079	0.47853	-0.25389	0.69215	-0.07079	-0.25389	-1.29149		19.4	0.63617	1.80804	1.61273	2.7724	1.97894	0.31878	-0.05963	0.39203	-0.43805	0.36761	0.01361	-0.64557	-0.90192	0.14789		19.4	-0.14846
19.45	1.76811	1.52397	1.52397	1.24931	0.66948	1.27983	-2.38228	-2.96212	-3.84713	-1.28365	-3.38936	-2.74849	-1.28365	0.12016		19.45	-0.19286	0.26491	0.99733	-0.9558	0.90578	0.47853	0.53957	-0.00975	0.23439	-0.19286	0.66164	0.14284	-0.40648	-1.35252		19.45	0.67269	1.27084	1.58822	2.56478	2.19857	0.6849	-0.07194	0.0013	0.514	0.44076	-0.32829	-0.14518	-0.37711	-0.10856		19.45	-0.51462
19.5	1.55438	1.89007	1.43231	2.13421	0.36419	1.73749	-1.46686	-2.53498	-3.93878	-1.80255	-3.51154	-3.08429	-1.03962	0.39471		19.5	-0.04027	-0.19286	0.81422	-1.23045	1.08888	0.84474	0.66164	0.05128	0.14284	-0.40648	0.26491	0.35646	-0.49803	-1.41356		19.5	0.47728	1.06322	1.84447	2.78441	2.17406	0.41625	-0.10866	0.50169	0.97777	0.78246	-0.365	0.23314	-0.5237	-0.13307		19.5	-0.78922
19.55	0.82185	1.88997	1.49324	2.2867	0.63875	1.79841	-1.16179	-2.13835	-3.35906	-1.58904	-3.99992	-3.66423	-1.95525	0.0284		19.55	0.02077	-0.52855	0.53957	-1.10838	1.05836	1.02785	0.66164	-0.1013	0.20387	-0.58958	-0.1013	0.32594	-0.49803	-1.68822		19.55	1.09974	1.3683	2.0763	2.28382	2.03968	0.44056	0.11097	0.29408	0.86781	0.41615	-0.03551	0.77015	-0.20641	0.34291		19.55	-0.91124
19.6	0.66916	2.31711	1.76779	2.25607	0.79123	1.9509	-0.09378	-1.71121	-3.29813	-1.71121	-3.38968	-3.75589	-1.25345	0.11984		19.6	-0.1013	-0.71165	0.35646	-0.98631	1.05836	0.90578	0.57008	-0.52855	-0.00975	-0.437	-0.13182	0.53957	-0.31493	-1.74925		19.6	1.71	1.62455	2.52787	2.25931	2.34476	0.25736	-0.10885	0.41605	0.97757	0.26957	0.01322	0.72123	0.09867	0.58695		19.6	-0.88067
19.65	0.76061	2.50011	1.92027	1.92027	1.30992	1.70665	-0.6432	-2.01649	-2.68788	-1.22303	-3.48134	-3.26771	-1.40614	-0.4601		19.65	-0.00975	-0.58958	0.4175	-0.68114	1.1194	0.93629	0.20387	-0.80321	-0.04027	-0.31493	-0.16234	0.72267	-0.31493	-1.6577		19.65	1.47796	2.18597	2.95502	1.83197	1.86859	0.92865	-0.21881	0.09857	0.42816	-0.59723	0.56244	0.46478	-0.12116	-0.16998		19.65	-0.42285
19.7	0.85205	2.28638	1.85913	1.85913	1.73706	1.52344	-0.79589	-1.80297	-3.08471	-1.92504	-2.65747	-3.45092	-1.19262	-0.27709		19.7	0.0818	-0.28441	0.50905	-0.58958	1.14992	0.63112	-0.00975	-0.80321	0.02077	-0.19286	-0.00975	0.66164	-0.74217	-1.59666		19.7	1.30697	1.67318	2.9183	2.14925	1.92953	1.14828	-0.96354	-0.2067	0.41586	-0.68278	0.5013	0.37923	-0.1945	-0.63395		19.7	-0.14814
19.75	1.73696	2.40835	1.24868	2.40835	1.30971	1.49282	-1.25376	-2.10825	-3.38999	-1.46739	-2.26084	-3.26792	-1.3148	-0.85704		19.75	-0.19286	-0.34544	0.29543	-0.83372	1.21095	0.26491	0.05128	-0.71165	0.20387	-0.07079	0.20387	0.53957	-0.80321	-1.50511		19.75	0.843	1.61205	2.90599	2.45433	1.74632	0.79418	-0.7317	0.06175	-0.53639	-0.52418	0.63548	-0.08473	-0.63405	-0.84157		19.75	-0.14809
19.8	1.76737	2.19462	1.1265	2.49979	1.61478	0.88236	-0.94869	-2.26095	-4.092	-1.40646	-2.8713	-3.78683	-1.49801	-0.30782		19.8	-0.13182	-0.49803	0.38698	-0.71165	0.99733	0.23439	-0.04027	-0.437	0.4175	-0.13182	0.38698	0.38698	-0.83372	-1.19994		19.8	1.25795	1.22132	2.36879	2.44203	1.80726	0.52552	-0.46325	-0.01159	-0.91491	-0.34118	0.318	0.33021	-0.39	-0.63414		19.8	-0.2701
19.85	0.97381	2.01141	0.82122	2.62176	1.1264	0.97381	-0.64362	-2.90192	-3.3902	-1.22346	-3.29865	-3.3902	-0.85724	-0.12482		19.85	-0.16234	-0.37596	0.50905	-0.49803	0.69215	0.20387	0.23439	-0.49803	0.6006	-0.04027	0.63112	0.29543	-0.9558	-1.04735		19.85	1.01371	1.56302	1.91703	2.71048	1.90482	0.56205	-0.06051	0.06156	-0.915	-0.0483	-0.53659	0.61088	-0.12155	-0.0483		19.85	-0.48367
19.9	0.18025	2.25544	0.69905	2.347	1.40095	0.7906	-0.70476	-2.5053	-3.11565	-1.80339	-4.0617	-3.26824	-1.4677	0.85163		19.9	-0.00975	-0.37596	0.38698	-0.34544	0.66164	0.32594	0.69215	-0.49803	0.47853	0.26491	0.78371	0.32594	-0.74217	-0.74217		19.9	0.9892	2.06341	1.14789	2.30755	1.61175	0.84271	0.3056	-0.41461	-0.63434	-0.3902	-0.31696	0.52533	0.25677	-0.29254		19.9	-0.94138
19.95	-0.46073	2.0112	1.27877	2.37741	1.06515	1.00412	-0.21659	-2.35282	-2.74954	-2.38333	-3.48197	-2.56644	-1.2847	1.06515		19.95	0.32594	-0.31493	0.29543	-0.13182	0.44801	0.75319	0.93629	-0.1013	0.66164	0.20387	0.63112	0.14284	-0.31493	-0.71165		19.95	0.87923	2.06332	1.45297	2.08773	1.69711	0.3055	-0.20719	-0.31705	0.14681	-0.08512	-0.54899	0.23226	0.65951	-0.01188		19.95	-1.21599
20	0.05797	2.16368	1.49229	2.22472	1.46178	0.88194	-0.88808	-1.92567	-3.32948	-3.23793	-3.14638	-2.53603	-2.04775	0.54625		20	0.57008	-0.04027	0.11232	-0.16234	0.26491	1.1194	1.1194	-0.07079	0.87526	0.26491	0.38698	-0.22337	-0.00975	-0.98631		20	0.67162	2.1975	1.41625	1.37963	1.3308	0.08568	-0.25612	0.14671	-0.30495	0.06127	-0.48805	-0.34157	0.52513	-0.34157		20	-1.33801
20.05	0.45459	1.27857	1.98047	1.58374	1.15649	1.21753	-0.49145	-2.26147	-3.39062	-3.66528	-2.41406	-1.80371	-1.6206	0.79028		20.05	0.53957	0.26491	-0.28441	-0.46751	0.38698	1.18044	1.02785	0.05128	0.78371	0.29543	0.11232	-0.28441	0.05128	-1.10838		20.05	0.92787	1.45277	1.84339	1.07435	1.31849	0.07338	-0.86657	0.52504	-0.52477	0.23207	-0.31725	-0.13414	0.72035	-0.48815		20.05	-1.4295
20.1	0.57656	1.37001	1.94985	0.97328	0.57656	1.18691	-0.88829	-2.50572	-3.48228	-3.17711	-2.74986	-1.86485	-1.71226	0.54604		20.1	0.57008	0.38698	-0.28441	-0.74217	0.57008	1.08888	0.84474	0.11232	0.78371	0.02077	-0.25389	0.02077	-0.07079	-1.1389		20.1	0.79349	1.3306	1.61136	1.26957	0.90336	-0.19528	-0.72018	0.90336	-0.80563	0.35404	0.19535	-0.01217	0.34183	-0.09762		20.1	-1.15479
20.15	1.1868	2.13285	1.98026	0.54593	0.75956	0.91214	-0.43063	-2.32272	-2.84152	-2.99411	-2.44479	-1.68185	-1.16305	0.88163		20.15	0.47853	0.38698	0.0818	-1.04735	0.6006	0.78371	0.87526	0.05128	0.72267	-0.22337	-0.19286	0.35646	-0.55907	-1.07787		20.15	1.19623	0.75677	1.85541	1.06195	0.87884	0.20746	-0.28082	0.57367	-0.46393	-0.39069	0.70795	0.6347	0.07318	-0.30524		20.15	-1.06319
20.2	0.6679	2.34636	2.01067	1.33928	0.94256	1.40032	-0.82746	-2.1092	-2.81111	-2.87214	-2.50593	-1.83454	-0.98005	-0.12556		20.2	0.35646	0.29543	0.0818	-1.53563	0.72267	0.57008	0.93629	0.29543	0.6006	-0.49803	-0.16234	0.63112	-0.68114	-1.04735		20.2	1.50131	0.54916	1.68441	1.30599	1.22054	0.41488	-0.09782	0.69564	-0.46403	-0.31754	0.37826	0.7933	0.43929	-0.51286		20.2	-1.03262
20.25	0.69831	3.1092	1.40022	1.67487	1.3697	1.3697	-0.85809	-2.20086	-2.41448	-2.9638	-2.23138	-1.25481	-1.59051	-0.06463		20.25	0.38698	0.29543	0.11232	-1.56615	0.66164	0.53957	0.66164	0.35646	0.63112	-0.58958	-0.19286	0.47853	-0.74217	-0.80321		20.25	1.61107	0.84203	1.89183	0.85424	1.62328	1.15941	0.12181	0.97631	-0.9402	-0.18336	0.13402	0.32933	0.36595	-0.86696		20.25	-0.78842
20.3	0.17941	2.52926	1.82736	1.40011	0.63717	1.49166	-1.5601	-3.08597	-2.44511	-3.02494	-2.65873	-0.76664	-1.25492	-0.85819		20.3	0.17336	0.53957	-0.16234	-1.50511	0.26491	0.35646	0.6006	0.26491	0.69215	-0.49803	-0.00975	0.14284	-0.92528	-0.92528		20.3	1.79408	0.95179	2.12367	1.1349	2.39222	1.09828	-0.20787	0.58558	-0.57409	-0.0858	-0.2445	0.24379	0.08509	-0.86705		20.3	-0.48319
20.35	0.05723	2.22398	1.52207	1.82725	0.63707	0.78965	-1.80434	-3.26918	-2.41469	-3.78798	-2.56728	-0.94985	-1.25502	-1.07192		20.35	0.11232	0.38698	-0.65062	-1.47459	0.02077	0.47853	0.6006	0.0818	0.6006	-0.437	0.26491	-0.04027	-0.71165	-1.07787		20.35	1.53763	1.57425	1.98929	1.20804	2.24564	0.67093	-0.46432	0.70756	-0.57418	-0.19576	-0.51315	-0.17135	-0.45211	-0.47653		20.35	-0.36107
20.4	0.51489	2.01025	1.30835	2.01025	0.75903	0.97265	-1.49927	-3.08618	-2.99463	-4.09326	-2.17066	-1.43823	-0.70581	-0.91944		20.4	0.23439	0.14284	-0.80321	-1.16942	0.05128	0.6006	0.50905	-0.13182	0.66164	-0.71165	0.23439	-0.07079	-0.49803	-1.32201		20.4	1.43988	1.37884	2.03802	1.34222	2.35541	0.71966	-0.62311	0.36566	-0.45221	-0.52545	-0.22028	-0.58649	-0.80621	-0.63531		20.4	-0.42205
20.45	0.72841	1.15565	1.15565	2.71205	0.60634	1.09462	-1.95714	-2.38439	-3.26939	-4.61217	-1.43834	-1.8961	-1.49937	-1.28575		20.45	0.32594	-0.22337	-0.74217	-0.77269	0.20387	0.69215	0.6006	-0.1013	0.6006	-0.71165	0.11232	-0.25389	-0.46751	-1.62718		20.45	0.75619	1.11019	1.90365	1.69613	2.01351	0.46322	-0.67203	0.52426	-0.57438	-0.22037	-0.28141	-0.48893	-0.04948	-0.11051		20.45	-0.57458
20.5	0.91141	1.064	0.60623	1.88797	0.7283	0.78934	-1.83517	-2.62863	-2.93381	-5.07004	-1.37741	-1.77414	-1.40793	-1.10275		20.5	0.14284	-0.25389	-0.68114	-0.68114	0.50905	0.57008	0.72267	-0.04027	0.26491	-0.49803	0.0818	-0.22337	-0.46751	-1.77977		20.5	0.30443	0.98802	2.01342	1.70824	1.52513	0.82933	-0.46461	0.67064	-0.83082	-0.22047	-0.29371	-0.4402	0.0725	0.0725		20.5	-0.91022
20.55	1.18596	0.9113	0.78923	1.27751	0.33147	0.63664	-2.44563	-2.07942	-3.33064	-5.64998	-2.20149	-1.68269	-1.89631	-1.83528		20.55	0.14284	-0.16234	-0.71165	-0.68114	0.69215	0.44801	0.81422	-0.37596	0.11232	-0.49803	-0.04027	-0.00975	-0.49803	-1.6577		20.55	0.4142	0.53627	1.54945	2.25746	1.54945	0.81703	-0.7943	0.34095	-0.47692	-0.0985	-0.29381	0.01136	0.08461	-0.12291		20.55	-0.91017
20.6	1.36896	1.15534	0.08722	1.30793	0.45343	0.20929	-2.68988	-1.98797	-3.36126	-5.10076	-3.30023	-1.80487	-1.49969	-1.10296		20.6	0.23439	-0.00975	-0.74217	-0.52855	0.44801	0.26491	0.72267	-0.49803	-0.04027	-0.58958	-0.04027	0.11232	-0.77269	-1.56615		20.6	0.29203	0.51176	1.57377	2.26957	1.4639	1.09769	-0.52584	0.48734	-0.69674	0.18217	-0.13522	-0.18405	0.34086	-0.08639		20.6	-0.91012
20.65	1.70455	1.613	-0.30961	1.46041	0.60592	0.20919	-3.45292	-1.80497	-3.9412	-4.76518	-4.00224	-2.14066	-1.62187	-1.4998		20.65	0.32594	-0.13182	-0.9558	-0.6201	0.20387	0.11232	0.78371	-0.437	0.0818	-0.86424	-0.19286	0.23439	-0.80321	-1.62718		20.65	0.46283	0.52386	1.41498	2.36713	1.89105	1.14642	0.06	0.10883	-1.09967	-0.30621	0.26752	-0.73346	0.18207	-0.18414		20.65	-0.94058
20.7	1.9791	2.00962	-0.00454	1.9791	0.81943	0.51426	-3.48354	-1.92715	-3.60561	-3.84975	-4.09389	-2.47646	-0.9811	-1.01162		20.7	0.66164	-0.437	-0.80321	-0.6201	0.14284	0.26491	0.78371	-0.25389	0.4175	-0.92528	-0.49803	0.26491	-0.58958	-1.56615		20.7	0.37728	0.80453	1.61019	2.29379	2.15951	0.71908	0.14535	0.24301	-1.44156	-0.44059	0.243	-0.51383	0.60922	-0.25748		20.7	-0.97104
20.75	1.30761	1.979	0.63622	0.88036	1.24658	0.9414	-3.66675	-2.44605	-3.75831	-4.49073	-3.84986	-2.62916	-1.04224	-1.68311		20.75	0.90578	-0.52855	-0.46751	-0.6201	0.02077	0.23439	0.96681	0.20387	0.69215	-1.01683	-0.71165	-0.13182	-0.46751	-1.71873		20.75	0.7556	0.81664	1.65892	1.4514	2.06176	1.04857	0.12084	0.21849	-1.92994	-0.636	0.2307	-0.34303	0.60912	-0.19655		20.75	-0.87944
20.8	0.36146	1.91786	1.46009	0.6056	1.33802	1.30751	-4.46032	-2.41564	-3.11754	-4.39928	-3.14806	-2.8734	-0.82872	-0.79821		20.8	0.87526	-0.55907	-0.13182	-0.83372	0.14284	-0.00975	0.96681	0.38698	0.69215	-0.92528	-0.65062	-0.65062	-0.46751	-1.8408		20.8	1.20717	0.54799	1.45131	0.99965	1.85414	0.82875	-0.50182	0.03529	-1.49059	-0.88024	0.41371	-0.58727	0.5724	-0.77037		20.8	-1.12353
20.85	-0.46262	1.79568	1.24637	0.66653	1.33792	1.03274	-3.97214	-3.08713	-3.17868	-3.97214	-3.05661	-2.35471	-1.10349	-0.79831		20.85	0.72267	-0.40648	-0.04027	-1.16942	0.26491	-0.22337	0.69215	0.47853	0.84474	-0.9558	-0.49803	-0.98631	-0.31493	-1.81029		20.85	0.85306	0.59672	1.35355	1.07279	1.62211	0.47465	-1.13668	0.07181	-1.33199	-0.41647	0.31596	-0.61178	0.58451	-0.45309		20.85	-1.09295
20.9	-0.951	2.0092	1.24626	0.66643	0.7885	1.24626	-3.69759	-3.20931	-3.05672	-2.81258	-2.87361	-2.20222	-0.46272	-0.46272		20.9	0.66164	-0.13182	-0.13182	-1.35252	0.11232	-0.16234	0.50905	0.57008	1.02785	-0.86424	-0.49803	-1.10838	-0.49803	-1.68822		20.9	0.5722	0.23041	1.23138	1.92719	1.96381	0.2182	-1.19781	-0.03815	-1.49078	-0.77057	0.3891	-0.68512	0.0351	-0.39215		20.9	-0.63514
20.95	0.05597	2.13117	1.55133	0.84943	-0.55438	1.36823	-2.69061	-3.60614	-2.8432	-2.62958	-3.05682	-1.59198	-0.34076	-0.768		20.95	0.47853	0.0818	-0.22337	-1.47459	-0.1013	-0.28441	0.63112	0.47853	0.96681	-0.55907	-0.46751	-1.23045	-0.9558	-1.50511		20.95	0.53549	0.23031	2.03695	2.36654	2.15902	-0.09928	-1.03922	0.23031	-0.99039	-1.01481	0.40121	-0.25797	-0.31901	-0.6486		20.95	-0.4825
21	0.6357	1.97847	1.30709	1.1545	-0.82914	1.58174	-2.62968	-3.05693	-2.93486	-2.90434	-2.47709	-1.9583	-0.21879	-0.67656		21	0.50905	-0.04027	-0.22337	-1.56615	-0.1013	-0.34544	0.75319	0.38698	0.84474	-0.40648	-0.65062	-0.9558	-1.07787	-1.16942		21	0.63304	0.64525	2.09789	2.00023	1.91478	0.12035	-0.39235	-0.07496	-0.67311	-0.6609	-0.17262	-0.22145	-0.40455	-0.53883		21	-0.54348
21.05	0.94077	2.46665	1.27646	1.82578	-0.58511	1.49009	-2.4772	-2.90445	-2.59927	-3.33169	-2.66031	-1.22598	-1.07339	-1.04287		21.05	0.6006	-0.07079	0.20387	-1.26097	0.14284	-0.31493	0.47853	0.38698	0.75319	-0.49803	-0.77269	-0.65062	-1.1389	-1.07787		21.05	0.9015	0.58412	2.11	2.04896	2.08558	0.23012	-0.28258	-0.29479	-0.28258	-0.90514	-0.51451	-0.47789	-0.02623	-0.6732		21.05	-0.51291
21.1	0.91015	2.06981	1.03222	2.49706	-0.06642	1.12377	-2.35523	-2.62989	-2.9961	-3.78956	-2.4773	-1.65333	-0.58521	-0.34107		21.1	0.17336	0.11232	0.35646	-0.86424	0.44801	-0.25389	0.35646	0.26491	0.69215	-0.437	-0.68114	-0.55907	-1.16942	-1.53563		21.1	0.79154	0.65726	1.585	1.95121	1.73148	0.0225	-0.05074	-0.22164	0.01029	-0.88082	-1.07613	-0.20943	0.42533	-0.92965		21.1	-0.57389
21.15	0.78797	1.97816	0.36073	2.55799	0.45228	1.79505	-2.99621	-2.44689	-2.8131	-3.39294	-3.36242	-1.50085	-0.58532	-0.40221		21.15	-0.13182	0.05128	0.35646	-0.80321	0.90578	-0.00975	0.11232	0.23439	0.69215	-0.13182	-0.25389	-0.6201	-0.80321	-1.77977		21.15	0.98676	0.47406	1.34076	1.76801	1.49945	0.30316	0.21771	-0.49029	0.10785	-0.97858	-1.25934	-0.42926	0.55951	-0.73443		21.15	-0.75694
21.2	1.06252	1.97805	0.63528	2.28323	0.78787	1.70339	-2.90476	-2.87424	-3.30149	-3.72873	-3.36252	-1.77561	-0.1887	-0.34128		21.2	-0.34544	0.17336	0.38698	-0.68114	1.02785	0.32594	-0.07079	0.17336	1.02785	0.02077	0.05128	-0.80321	-0.46751	-1.71873		21.2	0.73031	0.79135	1.7557	2.07308	1.20639	0.29086	-0.22184	-0.51481	0.38851	-0.95426	-0.91764	-0.72233	0.15658	-0.52701		21.2	-1.03154
21.25	1.48967	1.58122	1.21501	1.94743	1.91691	1.58122	-3.08797	-2.90487	-2.93538	-2.93538	-4.15609	-1.62313	-0.61605	-0.95174		21.25	-0.6201	-0.25389	0.11232	-0.68114	1.05836	0.47853	0.11232	-0.1013	0.87526	0.26491	0.29543	-1.04735	-0.19286	-1.59666		21.25	0.60814	0.99877	2.03637	1.21849	1.15746	0.07103	-0.27076	-0.17311	-0.08766	-0.42946	-0.53932	-1.10084	0.31517	-0.63697		21.25	-1.3977
21.3	1.45904	1.36749	1.7337	1.42852	1.88629	1.85577	-2.56928	-3.05756	-3.36273	-2.90497	-3.54584	-2.41669	-0.98236	-0.98236		21.3	-0.65062	-0.46751	-0.19286	-0.71165	0.90578	0.66164	0.44801	0.17336	0.44801	0.29543	0.26491	-1.07787	0.14284	-1.32201		21.3	0.86439	0.14418	2.4391	1.07191	1.73109	-0.05113	-0.64928	-0.36852	-0.67369	-0.28307	-0.19762	-1.44274	0.21742	-0.50279		21.3	-1.18402
21.35	1.33687	1.7336	1.94722	2.34395	1.97774	1.7336	-2.02007	-2.93559	-3.3018	-1.898	-3.51543	-2.47783	-1.22661	-1.31816		21.35	-0.86424	-0.437	-0.28441	-0.83372	0.44801	0.93629	0.69215	0.35646	0.4175	0.20387	0.05128	-0.86424	0.11232	-1.41356		21.35	0.8643	-0.02682	2.18265	1.3892	1.59672	-0.19772	-1.27193	-0.36861	-0.6982	-0.27096	-0.49068	-0.99117	-0.0024	-0.6982		21.35	-1.00087
21.4	0.75693	2.0997	1.0621	2.74057	1.5809	2.4354	-1.715	-3.14932	-3.17984	-1.31827	-3.24087	-2.81363	-0.92154	-0.58584		21.4	-0.77269	-0.28441	-0.28441	-1.19994	0.4175	0.78371	1.1194	0.32594	0.44801	0.17336	0.05128	-0.83372	0.05128	-1.44408		21.4	0.81537	-0.02692	2.39008	1.43793	1.49896	0.41254	-1.02789	-0.30768	-0.66168	-0.11236	-0.56402	-0.74713	-0.47857	-0.36871		21.4	-0.6346
21.45	-0.1587	2.2827	0.81786	2.25218	0.84838	2.25218	-1.56251	-3.36305	-3.85133	-1.13527	-3.66822	-2.81373	-0.21974	-0.95216		21.45	-0.83372	0.11232	-0.00975	-1.23045	0.53957	0.66164	1.33302	0.23439	0.29543	-0.28441	-0.16234	-0.52855	-0.34544	-1.44408		21.45	0.43685	0.29037	2.18246	2.17025	1.59652	0.75424	-0.74723	-0.21012	-0.39322	-0.16129	-0.1735	-0.77164	-1.11344	-0.21012		21.45	-0.84817
21.5	0.0243	2.37415	0.78724	1.91639	0.69568	1.97742	-1.86779	-3.02746	-3.75988	-1.50158	-3.72937	-2.63073	-0.28088	0.08533		21.5	-0.74217	-0.07079	0.14284	-1.41356	0.23439	0.32594	1.14992	-0.00975	0.11232	-0.46751	-0.00975	-0.68114	-0.9558	-1.53563		21.5	0.00951	1.08373	1.98705	1.97484	1.3889	0.40014	-0.6985	0.6931	-0.39332	-0.39332	0.13158	-0.45436	-0.85719	-0.68629		21.5	-1.06174
21.55	0.26833	1.39748	0.9092	1.70266	0.02419	1.58059	-2.11204	-3.48533	-4.06516	-2.41722	-3.94309	-2.96653	-0.34202	-0.40306		21.55	-0.92528	-0.00975	0.44801	-1.44408	-0.22337	0.17336	0.99733	0.20387	-0.04027	-0.58958	-0.19286	-0.52855	-1.16942	-1.59666		21.55	-0.07604	1.14467	2.10902	1.65736	1.3766	0.05824	-0.41783	1.01039	-1.0526	-0.27135	0.05824	-0.19811	-0.45445	-0.61315		21.55	-1.611
21.6	-0.03695	1.24479	1.24479	1.91618	-0.03695	1.27531	-2.17318	-3.18026	-3.9432	-2.53939	-3.33285	-2.9056	-0.98299	-0.28109		21.6	-0.86424	-0.19286	0.35646	-1.47459	-0.55907	0.05128	0.47853	0.26491	0.11232	-0.65062	-0.16234	-0.58958	-1.23045	-1.96288		21.6	-0.14938	0.79057	1.76713	1.52299	1.07133	-0.38131	-0.30807	0.75394	-1.28463	-0.41793	0.08256	-0.14938	-0.32027	-0.67428		21.6	-1.82457
21.65	-0.03705	1.30572	1.39727	2.03814	0.2376	1.85504	-2.57001	-2.5395	-4.12641	-2.87519	-3.05829	-2.90571	-0.92206	-1.01362		21.65	-0.83372	0.23439	0.53957	-1.47459	-0.22337	-0.04027	0.57008	0.57008	0.26491	-0.40648	-0.19286	-0.49803	-0.98631	-2.02391		21.65	0.26557	0.20453	1.60834	1.32758	0.6806	-0.08844	0.05805	0.41205	-1.05279	-0.1983	-0.21051	-0.05182	-0.18609	-0.82086		21.65	-1.94659
21.7	-0.12871	1.64131	1.09199	2.6789	0.60371	1.85493	-2.14287	-2.57012	-3.85186	-2.17339	-2.75322	-2.44805	-1.3189	-1.04424		21.7	-0.55907	0.0818	0.29543	-1.50511	-0.00975	-0.19286	0.47853	0.47853	0.57008	-0.34544	-0.25389	-0.437	-1.10838	-2.29857		21.7	0.63168	-0.52799	1.24203	1.47396	0.72934	0.04574	0.35092	-0.1984	-1.01627	-0.24723	-0.66227	-0.62565	0.00912	-0.46695		21.7	-1.61084
21.75	0.26791	1.73275	0.90878	3.10605	0.90878	1.88534	-2.11246	-2.38712	-3.24161	-1.95987	-2.93644	-2.26505	-0.70865	-1.47159		21.75	-0.31493	0.23439	0.20387	-1.47459	0.26491	-0.65062	0.53957	0.50905	0.6006	-0.07079	-0.25389	-0.31493	-0.77269	-2.02391		21.75	0.46068	-0.27174	1.25414	1.99877	1.04662	-0.18629	-0.07643	-0.66236	-0.84547	-0.5525	-0.66236	-1.05299	-0.23512	0.05785		21.75	-1.64131
21.8	0.57298	1.15282	0.51195	3.16698	0.69505	1.3054	-1.86842	-2.72292	-3.27223	-1.34963	-2.78395	-1.68532	-0.25099	-1.34963		21.8	0.05128	0.17336	-0.04027	-1.53563	0.23439	-0.65062	0.32594	0.32594	0.53957	-0.28441	-0.00975	-0.31493	-0.49803	-1.96288		21.8	0.68031	0.55824	1.71791	2.31605	1.20521	-0.13756	-0.54039	-0.51598	-1.05309	-0.27184	-1.15074	-0.56481	0.09437	0.43617		21.8	-1.36659
21.85	0.87805	0.81702	-0.31213	2.25134	-0.09851	0.29822	-1.92956	-2.38733	-3.30286	-1.22766	-3.30286	-1.65491	0.23718	-1.04455		21.85	0.11232	0.53957	0.20387	-1.62718	0.53957	-0.49803	0.29543	0.44801	0.35646	-0.28441	0.50905	-0.46751	-0.04027	-1.77977		21.85	1.07084	1.11967	1.58353	2.63334	1.71781	-0.14986	-0.85787	-0.27193	-0.95553	-0.14986	-1.04098	-0.2109	0.05766	0.81449		21.85	-1.45809
21.9	0.69484	1.15261	-0.12913	1.88503	-0.0681	-0.00706	-2.23484	-1.68553	-3.91331	-1.77708	-2.99778	-1.65501	-0.43431	-1.10569		21.9	0.11232	0.50905	0.11232	-1.68822	0.53957	-0.25389	0.02077	0.38698	0.35646	-0.49803	0.6006	-0.49803	0.11232	-1.93236		21.9	0.35053	1.46137	1.76654	2.69428	1.21723	-0.17438	-1.10211	0.22846	-0.40631	-0.25982	-0.98004	-0.13775	-0.28424	0.59467		21.9	-1.12235
21.95	0.84732	2.12906	-0.4039	1.21354	0.08439	0.14542	-1.86874	-1.71615	-3.97445	-1.99081	-2.60116	-1.89926	-1.1058	-0.89218		21.95	-0.1013	0.44801	0.29543	-1.29149	0.84474	-0.1013	0.05128	0.4175	0.4175	-0.16234	0.6006	-0.46751	0.35646	-1.90184		21.95	0.04525	1.18051	1.42465	2.58432	0.88754	0.04525	-0.78482	0.4725	-0.45523	-0.27213	-1.17545	-0.2233	-0.27213	-0.0524		21.95	-0.84764
22	0.8167	2.46465	-0.09883	0.75567	0.26739	0.93877	-1.77729	-1.50263	-3.85249	-2.11299	-2.23506	-2.17402	-1.56367	-1.50263		22	-0.00975	0.11232	0.29543	-1.01683	0.72267	0.02077	-0.1013	0.29543	0.63112	-0.19286	0.57008	-0.49803	-0.00975	-1.87132		22	-0.13795	0.80199	1.10717	2.85277	1.02172	0.02074	-0.79713	0.06957	-0.51637	-0.15016	-1.18775	-0.34547	-0.49195	-0.26002		22	-0.45085
22.05	0.66401	2.83076	0.4809	1.39643	0.96918	1.82368	-1.28912	-2.35723	-3.91363	-1.62481	-2.93707	-2.20464	-1.50274	-1.56377		22.05	0.0818	-0.25389	0.23439	-0.74217	0.81422	0.32594	-0.07079	0.23439	0.6006	-0.1013	0.26491	-0.22337	-0.437	-1.74925		22.05	0.17934	0.631	1.57094	2.77943	0.66762	-0.04039	-0.52867	0.06947	-0.56529	-0.2235	-0.69957	-0.61412	-0.61412	-0.68736		22.05	-0.14562
22.1	0.54183	2.06771	0.63339	1.67098	0.4808	1.54891	-0.77042	-2.72355	-3.57804	-2.35734	-3.39493	-1.5944	-0.70939	-1.86906		22.1	0.23439	-0.437	0.02077	-0.89476	0.69215	0.35646	-0.28441	0.32594	0.63112	-0.34544	0.20387	-0.1013	-0.77269	-1.53563		22.1	0.66752	0.37455	1.6685	2.74271	0.65531	0.86283	-0.22359	-0.19918	-0.60201	0.08158	-0.47994	-0.63863	-0.37008	-0.83395		22.1	-0.14557
22.15	0.51121	1.30467	0.48069	2.15916	0.60276	1.12156	-1.0757	-3.05935	-3.73073	-2.44899	-3.91384	-0.80104	-0.40432	-1.13674		22.15	0.32594	-0.55907	-0.19286	-0.86424	0.66164	0.47853	-0.28441	0.23439	0.4175	-0.46751	0.0818	0.20387	-0.89476	-1.77977		22.15	0.35004	0.41107	2.27875	2.46186	0.76508	0.82611	-0.89508	-0.419	-0.46783	0.22797	-0.28473	-1.01715	-0.46783	-0.52887		22.15	0.09862
22.2	0.87732	0.69421	0.69421	2.34216	0.48059	1.24353	-0.92322	-3.73084	-3.33411	-2.54065	-4.34119	-0.8927	-0.49597	-1.04529		22.2	0.23439	-0.28441	-0.22337	-1.23045	0.6006	0.11232	-0.40648	0.38698	0.50905	-0.46751	0.26491	0.05128	-0.77269	-1.77977		22.2	0.06918	0.9725	1.81479	1.61947	0.58188	0.77719	-1.21256	-0.08951	-0.15055	-0.13834	-0.21158	-1.34684	-0.74869	-0.26041		22.2	-0.02339
22.25	1.06032	0.11427	0.99928	1.85377	0.48048	1.09083	-1.65575	-3.51732	-3.15111	-2.66283	-3.79198	-1.28954	-0.86229	-0.86229		22.25	0.17336	-0.46751	-0.34544	-1.50511	0.47853	-0.07079	-0.40648	0.47853	0.44801	-0.31493	0.05128	-0.04027	-1.04735	-1.99339		22.25	0.41088	1.26537	1.59496	1.46068	0.59398	0.86254	-0.74879	0.2766	-0.21168	-0.08961	-0.61451	-1.09059	-0.49244	-0.44361		22.25	0.0377
22.3	1.42642	0.14468	0.87711	1.39591	0.75504	1.06021	-1.93051	-3.57846	-3.73105	-2.54086	-3.6395	-2.20517	-0.89291	-1.44223		22.3	-0.13182	-0.28441	-0.00975	-1.50511	0.72267	-0.37596	-0.37596	0.50905	0.6006	0.05128	0.14284	-0.37596	-1.04735	-1.74925		22.3	0.69154	1.74135	1.70473	1.41176	0.56947	0.50844	-0.45592	0.2643	-0.05309	-0.37047	-1.06627	-0.52916	-0.17516	-0.40709		22.3	-0.26743
22.35	0.6939	0.63286	1.24321	1.36528	0.66338	0.66338	-1.99165	-3.1208	-4.06685	-2.9377	-2.87666	-2.44941	-1.41182	-1.13716		22.35	-0.19286	-0.1013	0.02077	-1.35252	0.47853	-0.16234	-0.25389	0.69215	0.32594	-0.13182	0.26491	-0.46751	-1.32201	-1.62718		22.35	0.6182	1.79008	1.60697	1.26518	0.66703	0.31303	-0.37057	-0.10201	0.41068	-0.29732	-1.15182	-0.12643	-0.06539	-0.49264		22.35	-0.481
22.4	0.60224	1.42621	0.66327	1.67035	0.38862	0.63276	-2.57159	-3.05987	-4.03643	-2.99884	-3.30401	-2.60211	-1.41192	-1.25933		22.4	-0.1013	0.14284	0.17336	-1.1389	0.44801	0.17336	0.23439	0.53957	0.17336	-0.00975	0.35646	-0.49803	-1.35252	-1.41356		22.4	0.65473	1.3017	1.83881	1.35053	1.16742	0.48383	-0.16314	-0.27301	0.21527	-0.29742	-1.07867	0.12983	0.22748	-0.83453		22.4	-0.5725
22.45	0.99886	1.79232	0.57162	1.63973	0.32747	0.96834	-2.69377	-3.54826	-3.36515	-3.36515	-3.09049	-2.57169	-1.74772	-1.50358		22.45	0.20387	0.47853	0.02077	-1.29149	0.0818	0.35646	0.32594	0.6006	0.32594	0.17336	0.38698	-0.52855	-1.62718	-1.10838		22.45	0.54477	1.4725	1.8143	1.72885	1.10629	0.91098	-0.06559	-0.18766	0.03207	-0.57828	-1.33512	0.10531	0.15414	-1.05436		22.45	-0.57244
22.5	1.21238	2.12791	0.69358	1.60911	0.54099	0.60203	-2.38869	-3.76199	-2.87698	-3.48733	-3.6094	-2.51077	-1.41213	-1.62576		22.5	0.57008	0.38698	-0.16234	-1.16942	0.11232	0.4175	0.35646	0.35646	0.63112	0.72267	0.17336	-0.25389	-1.53563	-1.26097		22.5	0.82543	1.77758	1.91186	1.49682	0.91088	1.16723	0.39818	0.2517	-0.28541	-0.89576	-1.40846	0.16625	-0.07789	-1.35963		22.5	-0.32825
22.55	1.51745	1.85314	0.47985	1.27331	0.69348	0.99865	-2.05311	-4.34193	-3.33485	-3.48743	-3.30433	-2.32777	-1.41224	-1.65638		22.55	0.90578	0.35646	-0.04027	-1.07787	0.29543	0.05128	-0.00975	0.32594	0.84474	0.75319	0.26491	-0.28441	-1.32201	-1.23045		22.55	0.78871	1.53334	2.11928	1.6432	0.81313	1.30141	0.9352	0.32484	-0.23668	-0.55406	-1.39635	0.01967	-0.39537	-1.22545		22.55	-0.11457
22.6	1.57838	1.18165	0.11354	1.02906	1.36476	0.5713	-1.44286	-4.37255	-3.36547	-3.64013	-3.48754	-1.38182	-1.65648	-1.35131		22.6	1.39406	0.05128	0.05128	-0.83372	0.53957	0.02077	-0.04027	0.50905	0.63112	0.11232	0.14284	-0.22337	-1.1389	-1.74925		22.6	0.10502	1.30131	1.74076	1.39897	0.33695	0.39799	0.7642	0.36137	0.26371	-0.2856	-1.12789	0.04399	-0.63961	-0.67623		22.6	0.37376
22.65	1.60879	0.60171	0.2355	1.39517	1.08999	0.20498	-1.29038	-4.15903	-3.45712	-3.48764	-2.90781	-0.89365	-1.35141	-1.41245		22.65	1.33302	0.23439	0.53957	-0.71165	1.02785	-0.22337	-0.04027	0.38698	0.53957	-0.71165	0.38698	-0.25389	-0.92528	-1.93236		22.65	-0.15143	0.92279	1.37445	1.31342	0.33686	0.30023	0.28803	0.42231	0.60541	-0.29791	-0.65191	0.4101	-0.95709	-0.18805		22.65	0.12968
22.7	2.00542	0.32695	0.26591	1.42558	0.87626	0.51005	-1.87032	-4.46431	-2.8774	-3.60982	-2.60274	-0.71065	-1.16841	-1.19893		22.7	1.05836	0.23439	0.57008	-0.68114	1.05836	-0.1013	0.17336	0.35646	0.44801	-1.29149	0.29543	-0.13182	-1.10838	-2.23753		22.7	-0.02945	0.60531	1.15463	1.93588	1.13022	0.55649	-0.24918	-0.06607	0.11703	0.10482	-0.67643	0.56869	-0.8107	-0.42008		22.7	0.09921
22.75	1.70013	-0.03937	0.14374	1.54755	1.08978	1.08978	-1.62628	-4.58649	-3.12164	-4.00665	-2.3587	-1.29059	-1.26007	-1.41266		22.75	0.44801	0.53957	0.78371	-0.83372	1.18044	-0.13182	0.6006	-0.07079	0.84474	-0.92528	0.35646	-0.1013	-0.92528	-1.99339		22.75	0.31225	0.89818	0.54418	2.13109	1.49633	0.51977	-0.53004	-0.84742	-0.21266	0.11693	-1.31129	0.00707	-0.26148	-0.4568		22.75	-0.23643
22.8	1.15071	-0.49724	0.69295	0.96761	0.99812	0.7845	-1.59587	-4.15935	-4.00676	-3.97624	-2.48088	-2.05363	-1.71794	-1.07707		22.8	0.14284	0.84474	0.53957	-1.16942	0.81422	-0.13182	0.84474	-0.55907	1.1194	-0.80321	0.29543	-0.1013	-1.19994	-1.81029		22.8	0.7516	1.41078	0.61733	2.3141	1.60609	0.61733	-0.49351	-1.25035	-0.10289	0.03139	-1.5067	-0.21275	-0.31041	-0.18834		22.8	-0.02275
22.85	0.50974	-0.49734	0.75388	0.50974	1.12009	0.87595	-1.01614	-3.91531	-4.09841	-4.00686	-3.09133	-2.11477	-1.38235	-0.89407		22.85	-0.25389	1.30251	0.50905	-1.1389	0.81422	-0.07079	1.1194	-0.74217	1.14992	-0.31493	0.20387	-0.25389	-1.16942	-1.56615		22.85	0.93461	1.63041	0.37309	2.27738	1.98442	0.40971	0.15336	-1.519	-0.51803	-0.05416	-1.10396	-0.22506	-0.59127	0.03129		22.85	-0.08373
23.2	0.54015	-0.98573	0.93688	0.87584	1.36413	0.9674	-0.92469	-3.18299	-4.34266	-3.73231	-3.21351	-2.60316	-1.19935	-0.49745		23.2	-0.16234	1.42458	0.29543	-1.01683	0.66164	-0.07079	0.93629	-0.74217	0.90578	-0.31493	0.05128	-0.22337	-1.35252	-1.50511		23.2	0.64154	1.61811	0.31195	1.83783	1.99652	-0.05426	0.16547	-1.71441	-0.33502	-0.6524	-1.25055	-0.27398	-0.43267	0.40961		23.2	0.03839
23.25	0.87574	-0.86376	1.11988	1.94385	1.05884	0.75367	-1.59618	-3.27465	-3.7019	-3.73241	-3.21361	-2.42016	-1.26049	-0.49755		23.25	-0.25389	1.14992	0.17336	-0.98631	0.66164	-0.16234	1.05836	-0.28441	0.66164	-0.31493	-0.04027	-0.07079	-1.26097	-1.53563		23.25	0.58041	1.55697	0.71469	1.27621	1.45932	-0.06656	-0.05435	-1.50699	-0.43277	-1.39713	-1.11637	-0.6525	-0.42057	0.61703		23.25	0.00793
23.3	0.87563	-0.9249	0.78408	2.21841	0.66201	0.53994	-1.80991	-3.45786	-3.79355	-4.12925	-2.35923	-2.45078	-0.9249	-0.86387		23.3	-0.13182	0.69215	-0.07079	-1.19994	0.38698	-0.40648	0.57008	-0.22337	0.78371	-0.77269	0.11232	0.0818	-1.50511	-1.47459		23.3	0.29955	1.37377	0.33617	1.44701	1.44701	0.26293	-0.21314	-1.16529	-0.43287	-0.99439	-1.21412	-0.44508	-0.49391	0.48266		23.3	0.31316
23.35	0.72294	-1.0776	-0.13155	2.27934	0.84501	-0.28414	-1.87105	-3.54952	-3.97677	-3.519	-2.57296	-2.14571	-1.19967	-0.65035		23.35	0.05128	0.38698	-0.25389	-0.98631	0.26491	-0.46751	0.32594	-0.04027	0.81422	-0.98631	0.20387	0.29543	-1.62718	-1.47459		23.35	0.05531	1.05629	0.29945	1.45912	1.32485	-0.05455	-0.16441	-0.84801	-0.38414	-0.46959	-1.27525	-0.05455	-0.21324	0.21401		23.35	0.09959
23.4	0.60077	-0.95563	-0.25373	2.12664	0.84491	-0.40631	-1.56598	-3.88532	-3.48859	-3.1529	-2.57306	-2.1153	-1.13874	-0.68097		23.4	0.6006	0.32594	-0.37596	-0.86424	0.14284	-0.71165	0.02077	-0.04027	0.90578	-1.04735	0.50905	0.17336	-1.96288	-1.32201		23.4	0.43363	0.93412	0.68998	1.20268	1.03178	0.18949	-0.10347	-0.40865	-0.12789	-0.54293	-0.70162	-0.39644	0.18949	0.2017		23.4	-0.05295
23.45	0.8448	-1.99333	0.02083	1.60774	0.90584	-0.31487	-1.32195	-3.48869	-3.42766	-2.05437	-3.33611	-2.81731	-1.32195	-0.1928		23.45	0.63112	0.4175	-0.40648	-0.49803	0.14284	-0.71165	0.29543	0.0818	0.93629	-0.74217	0.53957	0.14284	-2.20702	-1.32201		23.45	0.65326	1.04389	1.17817	1.54438	0.76313	0.44574	0.0307	-0.37213	-0.16461	-0.10357	0.03071	-0.6651	0.15278	0.0185		23.45	-0.32755
23.5	1.3635	-2.11551	-0.22342	1.42453	1.11935	-0.34549	-1.77982	-4.0076	-3.39725	-1.81033	-3.42776	-3.00052	-0.92532	-0.28445		23.5	0.75319	0.44801	-0.31493	-0.437	0.23439	-0.80321	0.35646	-0.04027	1.27199	-0.55907	0.69215	-0.13182	-2.32909	-1.1389		23.5	0.55551	1.42221	1.39779	1.47104	0.7142	0.27475	-0.18912	-0.71402	-0.31119	0.48227	0.2015	-0.77506	0.14047	0.00619		23.5	-0.3275
23.55	1.30235	-2.42079	0.32579	1.66857	1.05821	-0.5287	-2.05458	-4.58754	-3.24476	-2.35975	-3.24476	-3.67201	-0.71181	-0.10145		23.55	0.72267	0.38698	-0.19286	-0.31493	0.23439	-0.55907	0.63112	-0.37596	1.48561	-0.31493	0.38698	-0.31493	-2.11546	-1.1389		23.55	0.49438	1.73949	1.16576	1.5808	0.79955	0.39672	-0.75074	-0.87281	-0.1526	0.531	-0.27467	-0.90943	-0.26246	0.40893		23.55	-0.54107
23.6	2.15674	-1.99365	0.11206	1.85157	1.05811	-0.37622	-1.3833	-4.28247	-3.51953	-2.57348	-2.84814	-3.36694	-0.62036	-0.16259		23.6	0.84474	0.44801	-0.19286	-0.71165	0.20387	-0.34544	0.72267	-0.34544	1.76027	-0.19286	0.26491	-0.68114	-1.77977	-1.1389		23.6	0.71401	1.88588	0.76283	2.00795	1.20229	0.55531	-0.65318	-1.12926	-0.47008	0.22572	-0.25035	-1.0316	-0.47008	0.71401		23.6	-0.44946
23.65	2.15664	-1.68858	-0.40684	1.33266	0.99697	0.08144	-0.92564	-3.9774	-3.79429	-3.24497	-2.54307	-3.55015	-0.3458	-0.58994		23.65	0.57008	0.66164	-0.25389	-0.89476	0.26491	-0.00975	1.02785	-0.28441	1.33302	0.02077	-0.04027	-0.65062	-1.26097	-1.1389		23.65	0.67729	1.86137	0.93363	2.21537	1.3853	0.31108	-0.61666	-1.23922	-0.39693	-0.03072	-0.43355	-0.66549	-0.11617	0.55522		23.65	-0.72407
23.7	2.55326	-0.71212	-0.43746	0.93583	1.17997	0.44755	-0.83419	-4.13009	-4.16061	-3.12301	-2.78731	-3.88595	-1.10885	-0.62057		23.7	0.50905	0.90578	-0.49803	-1.44408	0.32594	0.14284	0.93629	0.02077	0.93629	-0.00975	-0.37596	-0.65062	-0.98631	-1.04735		23.7	0.50629	1.58051	0.76264	1.86127	1.48285	-0.15289	-0.45806	-1.0318	-0.07965	-0.47027	-0.47027	-0.66558	-0.20172	0.23774		23.7	-0.78505
23.75	1.91229	-0.34601	-0.68171	0.84417	1.14935	1.08831	-0.71223	-3.55036	-4.46589	-3.2757	-2.54328	-3.51984	-1.29206	-0.86481		23.75	0.23439	0.84474	-0.46751	-1.50511	0.23439	0.50905	0.93629	0.02077	0.26491	0.0818	-0.74217	-0.437	-1.01683	-0.92528		23.75	0.62826	1.12875	0.79916	1.66586	1.75131	-0.05533	-0.04312	-0.31168	0.07895	-0.77555	-0.18961	-0.66568	-0.16519	-0.26285		23.75	-1.02913
23.8	2.03425	0.11164	-0.19353	1.11872	1.05769	0.75251	-1.13958	-3.33684	-3.91668	-3.39788	-3.00115	-3.64202	-1.59734	-0.59026		23.8	0.35646	0.63112	-0.40648	-1.53563	-0.1013	0.57008	0.72267	0.26491	0.17336	-0.1013	-0.77269	-0.31493	-1.29149	-0.92528		23.8	0.46947	1.06762	1.05541	1.10424	1.84887	-0.40943	0.24975	0.09106	-0.48267	-0.38502	-0.66578	-0.21412	0.05444	-0.5315		23.8	-0.75442
23.85	1.66794	-0.25467	-0.80399	2.06466	0.87448	0.72189	-1.07865	-3.67264	-4.00833	-3.12332	-2.94022	-2.87918	-1.56693	-0.52933		23.85	0.44801	0.29543	0.11232	-1.04735	-0.19286	0.63112	0.75319	0.32594	-0.00975	-0.13182	-0.58958	-0.04027	-1.47459	-0.77269		23.85	-0.0067	1.51918	1.17738	0.70131	1.29946	-0.48277	0.06655	0.39613	-0.49498	-0.21422	-0.86119	-0.39732	-0.38512	-0.60484		23.85	-0.8154
23.9	1.2711	-0.10219	-0.59047	2.21715	0.7523	0.50816	-1.13979	-3.36757	-4.19154	-2.90981	-3.00136	-2.63515	-1.47548	-0.59047		23.9	0.6006	0.05128	0.35646	-0.9558	-0.34544	0.26491	0.57008	0.44801	0.20387	-0.37596	-0.34544	0.29543	-1.74925	-0.6201		23.9	-0.21431	1.51908	1.49467	0.87211	0.99418	-0.17769	-0.22652	0.12748	-0.06783	-0.37301	-0.83687	-0.28756	-0.69039	-0.65377		23.9	-0.47966
23.95	1.36255	-0.68213	-1.01782	2.00342	0.72168	0.59961	-1.56714	-3.0625	-3.91699	-2.45215	-3.09302	-2.5437	-2.08594	-0.49902		23.95	0.32594	-0.00975	0.53957	-1.07787	-0.25389	0.14284	0.47853	0.11232	0.20387	-0.31493	0.20387	0.63112	-1.87132	-0.40648		23.95	-0.17779	1.34809	1.3725	1.42133	0.66449	0.07856	0.02973	-0.51959	-0.08013	-0.31207	-1.71588	-0.77593	-0.48297	-0.47076		23.95	-0.38805
24	0.99623	-0.07188	-0.52965	1.48451	0.47743	0.84364	-2.26915	-3.36778	-4.40538	-1.71983	-3.00157	-2.3607	-1.44517	-0.49913		24	0.14284	0.20387	0.35646	-1.56615	-0.1013	-0.22337	-0.07079	0.0818	0.47853	-0.52855	0.44801	0.63112	-2.14598	-0.40648		24	-0.10465	1.27475	1.0184	1.59213	0.99399	0.01742	-0.39761	-0.91031	0.09067	-0.56851	-1.65494	-0.99576	-0.29996	-1.20328		24	-0.29644
24.05	1.75907	-0.52975	-0.6213	0.99613	0.11112	1.42337	-2.45236	-3.36789	-3.88668	-2.05563	-3.33737	-2.66598	-1.26217	-0.25509		24.05	-0.00975	0.66164	0.38698	-1.74925	0.11232	-0.19286	-0.34544	0.26491	0.50905	-0.52855	0.44801	0.17336	-1.6577	-0.46751		24.05	-0.0315	1.37231	1.21362	1.20141	1.51879	0.22485	-0.42213	-0.53199	-0.2024	-0.30006	-1.45972	-0.77613	0.18822	-1.04469		24.05	-0.4795
24.1	1.66741	-0.52986	0.47722	0.62981	0.35515	1.05706	-2.6966	-3.79524	-3.61213	-2.11677	-2.87971	-2.33039	-0.89607	-0.74348		24.1	0.26491	0.93629	0.4175	-1.8408	0.02077	-0.13182	-0.80321	0.4175	0.78371	-0.83372	0.20387	-0.04027	-1.32201	-0.83372		24.1	-0.17808	1.01821	1.73842	0.96938	1.90932	0.39565	-0.05601	-0.54429	-0.75181	-0.23912	-1.02037	-0.66636	0.00502	-1.0692		24.1	-0.41841
24.15	2.1861	-1.26238	0.69074	0.29401	0.87385	0.23298	-2.3305	-4.07	-3.49017	-1.96429	-3.06292	-2.36102	-1.32342	-0.80462		24.15	0.20387	1.02785	0.78371	-1.68822	0.17336	0.20387	-0.6201	0.50905	0.72267	-0.86424	0.14284	-0.22337	-0.77269	-0.9558		24.15	-0.41011	1.11576	1.62846	0.67631	1.60405	0.05375	0.3101	-0.93502	-1.09371	-0.42232	-0.71529	-0.15377	-0.06832	-0.49556		24.15	0.03941
24.2	1.91134	-1.29301	1.20944	0.4465	0.84323	0.6296	-1.59818	-3.91752	-3.30716	-2.02543	-2.94095	-2.78837	-1.65922	-0.53007		24.2	0.23439	0.69215	0.96681	-1.56615	0.26491	0.4175	-0.80321	0.66164	0.6006	-0.89476	-0.13182	-0.07079	-0.80321	-1.38304		24.2	-0.28814	0.95698	1.5185	0.68842	1.44526	0.23676	0.49311	-0.5567	-1.46002	-0.60552	-0.82525	-0.33697	-0.25152	-0.59332		24.2	0.37516
24.25	1.57554	-0.80483	0.75157	1.02622	0.78208	0.8126	-1.75087	-3.82607	-3.27675	-1.59829	-3.06313	-2.42226	-0.77431	-0.77431		24.25	0.17336	0.69215	0.99733	-1.29149	0.63112	0.38698	-0.83372	0.93629	0.66164	-0.55907	-0.16234	-0.07079	-0.77269	-1.53563		24.25	-0.49576	0.70053	0.88364	1.11557	1.60385	0.20004	0.2977	-0.53238	-1.69205	-1.10611	-0.60562	-0.22721	0.2977	-0.20279		24.25	0.77194
24.3	1.72802	-0.7439	1.02612	1.08716	0.69043	1.05664	-1.75098	-3.7041	-3.91773	-1.84253	-3.39893	-2.14771	-0.7439	-0.68286		24.3	0.57008	0.53957	0.6006	-1.04735	0.84474	0.44801	-1.10838	0.72267	0.63112	-0.52855	-0.16234	0.02077	-1.07787	-1.6577		24.3	-0.9231	0.89575	0.59057	1.5183	1.55492	-0.2273	-0.32496	-0.52027	-1.71656	-0.84986	-0.10523	-0.80103	0.62719	-0.44703		24.3	0.68044
24.35	1.72792	-0.28624	0.72084	1.60585	0.44618	0.72084	-1.87315	-3.24645	-4.16197	-2.45299	-3.18541	-1.93419	-0.71349	-1.20177		24.35	0.6006	0.84474	0.4175	-0.89476	1.27199	0.26491	-1.1389	0.50905	0.66164	-0.40648	0.35646	-0.13182	-1.16942	-1.50511		24.35	-1.19175	0.9811	0.71254	1.60366	1.39614	0.22426	-0.23961	-0.83775	-1.7899	-1.24058	0.70033	-0.48375	1.05434	-0.19078		24.35	0.61946
24.4	2.67386	-0.59152	0.87332	2.06351	0.81229	0.41556	-2.23947	-3.39914	-4.34518	-2.72775	-3.58224	-1.78171	-0.95773	-0.74411		24.4	0.81422	0.78371	0.20387	-0.83372	1.33302	0.17336	-1.16942	0.23439	0.6006	-0.52855	0.72267	0.02077	-1.16942	-1.59666		24.4	-1.02095	1.01762	0.66362	1.73783	1.3228	0.41948	-0.38619	-0.34957	-1.25289	-0.94771	0.35844	-0.7524	0.66362	-0.7524		24.4	0.19227
24.45	2.73479	-0.1949	0.01872	2.64324	0.50701	0.17131	-2.72786	-3.73494	-4.7115	-2.94148	-3.09407	-2.33113	-0.95784	-0.22542		24.45	0.72267	0.90578	0.4175	-0.65062	1.39406	-0.25389	-0.86424	0.47853	0.78371	-0.437	1.08888	-0.04027	-0.89476	-1.44408		24.45	-0.70367	1.3227	1.17621	1.22504	0.56586	0.57807	-0.37408	0.44379	-1.14312	-1.25298	-0.16656	0.01655	0.22407	-0.55718		24.45	0.07025
24.5	2.88727	-0.22552	-0.46966	2.27692	0.96466	0.29328	-2.94159	-3.39935	-3.73504	-2.42279	-3.3078	-2.11761	-0.98846	0.07966		24.5	0.81422	0.50905	0.23439	-0.13182	0.96681	-0.25389	-0.55907	0.69215	0.72267	-0.55907	0.90578	0.26491	-0.92528	-1.71873		24.5	-0.04459	1.59116	2.17709	1.3226	0.26059	0.73666	-0.43521	0.26059	-0.64273	-0.5939	-0.65494	0.05307	0.1141	-0.61832		24.5	-0.41798
24.55	1.88009	-0.07304	-0.31718	2.12423	1.42232	0.23214	-3.06376	-3.27738	-3.55204	-1.90409	-3.00273	-2.17875	-1.41581	0.29317		24.55	0.93629	0.47853	0.23439	0.05128	0.81422	-0.25389	-0.437	1.1194	0.69215	-0.49803	0.69215	0.26491	-1.10838	-1.81029		24.55	0.00414	1.29809	2.59203	1.6643	0.60229	0.55346	-0.58179	0.23608	-0.63062	-0.69166	-0.64283	0.30932	-0.4109	-0.86256		24.55	-0.66207
24.6	1.87998	0.14048	-0.80556	1.66636	1.30015	-0.1647	-3.00283	-3.30801	-3.33852	-2.02627	-2.91128	-2.39248	-1.32436	-0.40884		24.6	1.08888	0.26491	-0.04027	0.11232	0.6006	0.17336	0.0818	1.36354	0.32594	-0.80321	0.29543	0.32594	-1.26097	-1.90184		24.6	0.30922	1.26137	2.46987	1.35903	0.51674	0.99282	-0.00816	-0.41099	-0.37437	-0.31334	-0.28892	-0.26451	-0.41099	-0.74058		24.6	-1.15029
24.65	1.78832	0.32348	-0.50049	1.78832	1.26952	0.26245	-2.69776	-3.39966	-3.27759	-2.20948	-3.12501	-2.60621	-1.01929	-0.46998		24.65	1.1194	0.4175	-0.19286	-0.34544	0.69215	0.17336	0.38698	1.51613	0.35646	-0.9558	0.29543	-0.04027	-1.23045	-1.62718		24.65	0.56547	0.76078	1.33451	1.46879	0.77299	0.33354	0.05278	0.2725	-0.53316	-0.65523	-0.28902	-0.74068	-0.32564	-1.10689		24.65	-1.24179
24.7	2.09339	0.87269	-0.53112	2.09339	0.75062	0.7201	-3.06408	-3.4608	-3.7965	-2.08751	-3.03356	-3.43029	-1.35509	-1.0194		24.7	1.05836	0.44801	-0.28441	-0.46751	0.44801	0.35646	1.02785	1.21095	0.35646	-1.16942	0.17336	-0.28441	-1.10838	-1.56615		24.7	0.32123	0.956	0.72407	1.44428	0.24799	0.27241	0.00385	0.01606	-0.22808	-0.21587	-0.02056	-0.69195	-0.04498	-0.38677		24.7	-1.08915
24.75	2.03225	0.56741	0.38431	2.12381	1.33035	1.05569	-3.18625	-3.30832	-4.1323	-2.30124	-3.76608	-3.76608	-1.62985	-1.62985		24.75	1.05836	0.50905	-0.16234	-0.71165	0.29543	0.32594	0.99733	0.99733	0.47853	-1.29149	0.14284	-0.40648	-1.23045	-1.44408		24.75	0.0892	0.61411	0.21127	1.93246	0.56528	-0.41129	-0.28922	0.18686	-0.28922	-0.37467	-0.64322	-0.80191	-0.6066	-0.0817		24.75	-0.44823
24.8	2.39836	1.26921	1.02507	2.09318	0.65886	1.33024	-2.51497	-2.66756	-4.16292	-2.3929	-3.67464	-3.55257	-1.26375	-1.41634		24.8	0.69215	0.47853	0.02077	-0.46751	0.26491	0.57008	1.1194	0.6006	0.38698	-1.38304	0.0818	-0.28441	-1.07787	-1.35252		24.8	-0.19166	0.7727	0.39428	1.9812	0.61401	0.04028	0.00366	-0.28931	-0.21607	-0.28931	-0.37476	-0.094	-0.88746	0.28442		24.8	0.10114
24.85	1.87946	1.75739	1.02496	1.66583	1.17755	0.62824	-2.2099	-2.42352	-4.37665	-2.85077	-3.91888	-3.46112	-0.95868	-1.11127		24.85	0.47853	0.29543	0.20387	-0.437	0.57008	0.63112	0.72267	0.47853	0.57008	-1.44408	-0.00975	-0.04027	-0.92528	-1.29149		24.85	-0.03306	0.5895	0.29653	2.35952	1.01674	-0.55797	0.25991	-0.1063	-0.20396	-0.20396	-0.80211	-0.15513	-0.64341	-0.4481		24.85	0.31482
24.9	1.63521	2.67281	0.62813	2.33711	0.7502	0.50606	-2.33207	-2.45414	-4.62089	-3.73588	-3.94951	-2.94243	-0.77568	-0.4705		24.9	0.11232	0.50905	0.4175	-0.37596	1.08888	0.6006	0.50905	0.17336	0.78371	-1.19994	0.14284	-0.19286	-0.55907	-1.04735		24.9	-0.30172	0.50395	1.01664	1.49272	0.87016	-0.28951	0.12553	-0.53365	-0.57027	-0.70455	-0.75337	0.35747	-0.31392	-0.85103		24.9	0.34539
25.2	1.08579	2.24546	-0.04336	2.06235	1.57407	0.47544	-1.87442	-2.48477	-4.43789	-3.67495	-3.49185	-2.8815	-1.35562	-0.62319		25.2	0.35646	0.63112	0.23439	-0.49803	1.08888	0.6006	0.44801	0.32594	0.87526	-1.16942	0.23439	-0.25389	-0.71165	-1.35252		25.2	0.0644	0.35737	1.17524	0.99213	1.34614	-0.65582	0.2353	-1.09527	-0.35064	-0.06988	-0.88775	0.14985	0.44282	-0.76568		25.2	-0.14284
25.25	1.08568	1.84862	0.23119	2.06225	1.23827	0.53637	-1.26417	-3.03419	-4.83473	-3.70557	-3.06471	-2.79005	-1.6609	-0.71485		25.25	0.44801	0.93629	0.35646	-0.52855	1.1194	0.44801	0.50905	0.20387	0.78371	-0.92528	0.72267	-0.71165	-0.89476	-1.26097		25.25	-0.15543	0.55258	1.60239	0.34506	1.66342	-0.44839	-0.02115	-1.03433	-0.4606	-0.59488	-0.69254	-0.06998	0.11313	-1.21744		25.25	-0.38693
25.3	0.87196	1.02454	0.04798	1.51282	1.75697	0.68885	-1.08117	-3.15636	-4.98742	-3.85827	-2.57653	-2.33239	-2.1798	-0.65392		25.3	0.78371	0.81422	0.29543	-0.49803	0.75319	0.32594	0.81422	0.38698	0.75319	-1.29149	0.84474	-0.80321	-1.32201	-1.44408		25.3	-0.16773	0.39379	1.57788	1.1018	2.10278	-0.70484	0.34496	-1.48609	0.406	-0.42408	-0.37525	-0.16773	0.08862	-0.8147		25.3	-0.63101
25.35	1.54324	1.36013	0.38357	1.08547	1.42117	1.05496	-0.65403	-3.30906	-4.71287	-3.98044	-2.60715	-2.66819	-3.0344	-0.7761		25.35	0.53957	0.78371	0.6006	-0.65062	0.63112	-0.00975	1.02785	0.20387	0.72267	-1.35252	1.27199	-1.19994	-1.50511	-1.29149		25.35	-0.18004	0.72329	1.34584	0.77211	1.72426	-0.48521	-0.22886	-0.96128	0.21059	-0.61949	-0.80259	-0.79039	-0.44859	-0.90025		25.35	-0.47837
25.4	1.81779	1.54313	0.01725	1.26847	1.02433	1.39054	-0.86776	-3.33968	-4.86556	-4.49935	-2.82088	-3.46175	-2.88192	-0.89827		25.4	0.26491	0.69215	0.53957	-0.437	0.32594	-0.07079	1.51613	0.4175	0.50905	-1.35252	1.08888	-1.16942	-1.77977	-1.41356		25.4	-0.3022	0.72319	1.76079	1.54106	1.67534	-0.27779	-0.14351	-0.86373	-0.18013	-0.54634	-0.44869	-0.90035	0.07622	-0.43648		25.4	-0.38677
25.45	2.1839	1.60406	-0.10492	0.84112	0.99371	0.90216	-0.77631	-4.10272	-4.68256	-5.26239	-3.12616	-3.43134	-2.75995	-0.77631		25.45	-0.04027	0.99733	0.53957	-0.74217	0.57008	-0.22337	1.45509	0.38698	0.44801	-0.83372	0.99733	-0.98631	-1.99339	-1.32201		25.45	-0.38775	1.35786	1.79731	1.34565	1.52875	-0.32671	-0.97369	-0.02154	-0.71734	-0.60748	-0.25347	-1.60845	0.28364	-0.39996		25.45	-0.23412
25.5	2.0312	1.39033	-0.07451	1.29878	0.93257	0.44429	-0.929	-4.19438	-4.40801	-5.32353	-3.33989	-3.40092	-2.30229	-1.08159		25.5	-0.19286	1.21095	0.23439	-0.6201	0.75319	0.02077	1.66872	0.38698	0.26491	-0.437	0.6006	-0.71165	-1.87132	-1.07787		25.5	-0.58316	0.91831	2.11459	1.58969	1.21127	-0.1315	-1.15689	0.23471	-0.87613	-0.96158	0.0394	-1.24234	0.13705	-0.11929		25.5	-0.17304
25.55	2.18369	1.60385	-0.01358	0.84091	1.26816	-0.07461	-1.20376	-4.0419	-4.07242	-4.80484	-3.46207	-2.85172	-1.75308	-0.77652		25.55	-0.00975	1.21095	0.11232	-0.68114	0.87526	0.17336	1.39406	0.47853	0.6006	-0.1013	0.35646	-0.25389	-1.53563	-0.9558		25.55	0.02709	1.08911	1.80932	1.40649	1.21118	-0.74195	-0.92505	0.33227	-0.32691	-0.40015	-0.21705	-1.48658	0.29565	-0.55884		25.55	-0.23402
25.6	1.81737	1.78685	0.16942	0.93236	-0.19679	-0.44093	-0.92921	-4.71339	-4.04201	-4.5608	-3.06544	-2.18043	-1.7837	-0.65455		25.6	0.17336	1.02785	0.17336	-0.46751	0.93629	0.6006	1.1194	0.38698	0.6006	0.0818	0.29543	-0.07079	-0.83372	-0.89476		25.6	-0.08287	0.61293	1.10122	1.57729	0.93032	-0.41246	-0.77867	0.33217	-0.33921	-0.41246	-0.29039	-0.6566	0.27114	-0.43687		25.6	-0.05086
25.65	1.63416	1.96985	0.29139	1.11536	-0.07482	-0.13586	-0.92932	-4.62194	-3.58435	-4.04211	-3.21814	-1.99743	-1.78381	-1.32605		25.65	0.44801	0.6006	0.05128	-0.49803	0.63112	0.84474	0.75319	0.44801	0.66164	0.02077	0.29543	0.20387	-0.49803	-1.10838		25.65	-0.03414	0.45415	1.08891	1.95561	1.19877	-0.62007	-0.10738	-0.18062	0.22221	0.10014	-0.33931	-0.22945	0.27104	-0.58345		25.65	-0.17287
25.7	1.5425	1.81716	0.38283	1.75612	-0.28855	-0.04441	-0.44114	-4.62205	-4.22532	-3.676	-3.03513	-1.47874	-1.81443	-1.14304		25.7	0.47853	0.44801	0.23439	-0.55907	0.47853	0.84474	0.78371	0.23439	0.6006	0.26491	0.69215	0.11232	-0.1013	-0.9558		25.7	-0.64459	0.18549	0.49067	1.2353	1.00336	-0.59576	-0.07085	0.05122	-0.24175	-0.47369	-0.53472	-0.10748	-0.04644	-0.4981		25.7	-0.29489
25.75	1.7255	1.78654	0.07755	2.51896	0.47428	0.59635	-1.26522	-4.31698	-4.68319	-3.34042	-3.24886	-1.66195	-2.24178	-1.11263		25.75	0.57008	0.29543	0.17336	-0.55907	0.11232	0.84474	1.08888	0.14284	0.63112	0.17336	0.90578	0.32594	-0.25389	-1.07787		25.75	-1.05972	-0.31509	0.8934	1.24741	0.85678	-0.69351	0.35629	-0.52261	-0.30289	-0.27847	-0.54703	-0.57144	0.33188	-0.63248		25.75	-0.66105
26.3	2.24314	12.3139	21.6828	32.0283	43.5945	53.6042	59.4026	69.0766	77.8047	87.6008	96.695	104.935	111.71	112.869		26.3	0.44801	0.63112	0.50905	-0.31493	0.47853	1.02785	1.72975	0.69215	1.27199	0.99733	2.18752	1.42458	0.69215	0.4175		26.3	-0.91334	-0.05884	0.96655	0.63696	0.77123	-0.57154	0.17309	0.17309	-0.84009	-0.75464	-0.97437	-1.08423	0.31957	-0.44947		26.3	-0.81358
26.35	1.84631	11.673	20.1569	29.6478	40.451	48.8434	54.245	62.7899	71.9757	80.0323	89.0045	97.3358	103.195	104.691		27.05	0.87526	8.59621	16.836	24.2212	33.1934	41.6773	50.6189	60.2319	69.5093	77.5964	86.6907	96.0291	108.358	116.018		27.05	-1.23082	-0.19322	0.78334	1.45473	0.38051	0.20961	0.14858	0.36831	-0.6815	-0.87681	-0.96226	-1.14537	0.56362	-0.3397		27.05	-0.78301
26.4	1.29689	10.2996	19.1497	28.0913	37.7349	45.3643	49.2705	58.6394	66.9097	74.1423	84.2131	91.8731	98.1292	99.3499		27.1	1.21095	8.19948	15.8289	22.5122	31.0877	39.2664	47.5671	56.4783	65.4505	73.2935	81.991	90.8106	102.834	111.257		27.1	-0.62056	0.02641	1.3936	1.55229	0.55131	-0.41304	-0.42525	0.30717	-0.48628	-1.09664	-1.02339	-1.10884	0.05083	-0.26656		27.1	-0.69141
26.45	1.35782	10.3605	18.112	27.4504	35.5375	42.526	46.9816	54.611	63.339	69.5036	80.0321	87.7531	93.5819	96.0233		27.15	1.27199	7.98585	15.0659	21.2	29.3176	37.2827	45.1563	53.4876	61.5137	69.4483	77.9626	86.1108	98.4094	107.504		27.15	-0.80376	-0.169	1.00288	1.72309	0.40473	-0.37652	-0.92584	0.06293	-0.49859	-0.80376	-0.64507	-0.88921	0.28266	-0.19341		27.15	-0.50825
26.5	1.35771	9.96367	17.3489	25.3445	32.7908	40.2676	45.5166	51.8948	59.1885	65.4446	77.2549	84.7012	90.7437	95.3824		27.2	1.36354	7.46706	14.1504	20.2234	27.6697	35.5737	43.2642	50.5579	57.9736	65.7251	74.3311	82.052	94.8694	104.055		27.2	-0.30337	-0.25455	1.50327	1.89389	1.02719	-0.95035	-0.8771	-0.29117	-0.38882	-0.44986	-0.80386	-0.80386	0.45346	-0.27896		27.2	-0.78285
26.55	0.89984	10.7265	16.5554	24.4289	31.4479	38.4059	43.2888	49.0566	56.7165	63.1862	74.5998	81.985	89.8891	96.2673		27.25	1.08888	7.46706	13.4485	19.1248	26.4185	33.6816	41.3721	48.3301	54.9219	62.6733	71.3098	78.6951	91.9397	101.064		27.25	-0.65748	-0.03492	1.86938	1.57641	0.80737	0.05053	-0.99927	-0.62085	-0.62085	-0.49878	-0.34009	-0.37671	0.74633	-0.19361		27.25	-0.59969
26.6	1.08285	10.6043	15.3346	23.086	29.5557	36.0865	41.3355	47.317	53.7562	61.1109	72.6466	80.276	89.2176	97.9762		27.3	1.1194	7.40602	12.4719	18.3924	25.2588	32.1558	39.7546	46.1328	52.2058	59.8657	68.5022	75.7349	89.773	98.4399		27.3	-0.58433	0.09926	1.62514	2.00356	1.06362	0.66079	-0.57212	-1.0604	-0.21812	-0.46226	-0.86509	-0.10826	0.48989	-0.05943		27.3	-0.38602
26.65	1.23533	10.1465	14.8462	22.2314	28.3349	34.8047	38.9245	45.2722	51.803	59.2492	71.8225	77.7734	88.9428	99.9292		27.35	1.24147	7.22292	11.8616	17.5989	24.4654	30.5689	37.8626	44.3628	49.9475	57.4549	66.0608	73.5681	87.9724	95.907		27.35	-0.51119	0.45317	1.64946	1.90581	0.80717	1.22221	-0.51119	-0.68208	-0.8896	-0.71871	-0.58443	-0.26705	0.59965	0.17241		27.35	-0.20286
26.7	2.30334	8.89513	13.9305	20.8885	26.7174	32.9735	38.0699	43.1053	49.5445	57.5401	71.3951	75.8812	89.2784	102.767		27.4	1.08888	7.1924	11.4038	16.9885	23.7024	29.4397	36.1231	42.4097	47.7808	55.4407	63.9246	71.2183	86.7517	94.0149		27.4	-0.63335	0.18452	1.10004	2.12543	1.03901	0.68501	-0.10845	-0.42583	-0.60894	-0.63335	-0.91411	-0.82867	0.28217	0.06245		27.4	-0.11125
26.75	1.7234	8.92555	14.022	20.3086	26.168	31.9358	35.4758	40.8164	47.7134	55.5869	71.1814	75.2402	89.8276	104.629		27.45	1.1194	6.88722	11.0986	16.5918	22.9395	28.4021	34.5667	40.9143	45.7666	53.5181	61.7883	69.1431	85.2564	92.3059		27.45	-0.13296	2.02768	3.6146	4.50571	5.23813	5.25034	5.83628	7.38657	7.56967	8.16782	9.8768	10.5726	13.1239	13.661		27.45	-0.44689
26.8	1.50967	9.23062	13.7167	19.7287	25.3134	30.0436	34.2245	38.558	46.279	54.7628	70.8761	75.9115	90.0106	104.903		27.5	0.84474	6.88722	11.0376	16.012	22.4512	27.273	32.9492	39.48	44.1797	51.9312	60.0794	67.7393	83.1812	90.5054		27.85	0.00053343	11.9268	20.8746	31.6778	42.4078	51.3677	61.585	71.2286	79.8101	88.233	97.1685	103.382	108.509	117.457		28.2	-0.26298
26.85	0.92973	8.92534	14.1133	19.3929	24.5809	29.3416	32.607	37.5813	45.6075	53.7251	70.6929	76.3387	91.0176	103.896		27.55	0.69215	6.58205	10.4883	15.6763	21.9019	26.7542	31.759	38.1372	42.4097	50.4663	58.584	66.6711	81.4417	88.6133		27.9	-0.08501	10.4985	18.3842	27.9423	37.7568	45.3374	54.5292	62.6225	70.3007	77.747	86.06	92.7128	97.559	107.715		28.25	-0.26293
26.9	1.20428	8.62006	13.1672	18.8434	23.7873	28.1818	32.027	36.2385	45.1801	54.1828	70.9064	76.9794	90.6513	101.912		27.6	0.72267	6.18532	9.87794	15.3406	21.2305	26.3269	30.7215	36.4588	41.0364	49.1236	56.9361	66.0303	79.8547	86.2024		27.95	-0.01187	9.80258	16.8216	25.3788	34.5096	41.4554	49.0604	57.2879	64.3314	71.326	78.4427	85.7303	91.6263	101.746		28.3	-0.29339
26.95	1.2347	7.76546	12.9535	18.0499	23.7872	28.3038	31.0504	35.8721	44.0814	53.786	71.1505	79.2071	89.461	100.081		27.65	0.78371	5.97169	9.57277	14.8828	20.376	25.8692	29.867	35.1465	39.7241	47.8723	55.5628	65.0537	78.7866	84.0357		28	-0.54908	8.56958	16.0891	23.7673	31.7629	38.3547	45.6667	53.052	60.1443	66.2356	73.5598	81.0061	88.2571	97.5344		28.35	-0.35437
27	1.11252	7.91794	12.2209	17.5615	23.6955	26.8694	30.1958	34.6208	43.2268	54.2131	71.4555	81.6789	88.4843	98.9519		27.7	0.93629	5.636	9.35915	14.5471	19.2163	24.8926	29.1956	33.7122	38.7781	46.0718	54.0064	63.8635	77.8406	81.9299		28.05	-0.19517	7.94692	15.2345	22.0949	29.4313	35.7301	42.1876	49.6583	56.9337	62.7687	70.2394	77.6613	85.486	93.7379		28.4	-0.47639
27.05	1.23449	7.61266	12.0377	17.0731	23.1766	26.3504	29.1886	33.8273	41.7618	53.5111	71.4554	84.0592	88.8199	98.3109		27.75	1.02785	5.54445	9.17604	13.7232	18.4229	23.4888	28.158	32.4304	38.1067	44.2102	52.572	62.6428	76.2842	79.5801		28.1	-0.0854	7.25102	14.1236	20.7886	27.3926	33.6304	39.6729	46.1304	53.9795	59.1065	67.8956	76.941	84.2408	91.0035		28.45	-0.90358
27.1	1.08179	8.25342	11.7935	16.8899	22.5967	25.0076	28.2424	32.5149	41.7922	53.2668	71.2722	85.7986	89.2471	97.3953		27.8	0.81422	5.48341	8.84035	12.9602	17.6904	22.4207	27.2119	31.2402	37.1607	42.6538	51.2293	61.1475	74.148	77.8406		28.15	0.18305	7.11665	13.1835	19.6411	25.5859	32.0434	37.0971	43.7988	51.4648	56.5307	65.1	76.3061	83.142	89.7949		28.5	-1.17819
27.15	1.84463	7.82607	11.7018	16.0353	21.6505	25.099	28.0897	31.5688	41.609	52.6564	71.15	86.1342	89.4301	96.6322		27.85	0.63112	5.36134	8.26051	12.4109	17.1716	21.5967	26.4185	30.1416	36.2756	41.4026	49.9475	59.8047	71.2488	76.4368		28.2	-0.41519	6.00571	12.3534	18.8963	24.4872	30.1146	35.1439	41.8578	49.2186	53.8084	63.2323	74.9388	82.4828	90.5394		28.55	-1.26969
27.2	1.35624	7.61235	11.6102	15.73	20.6739	24.0308	27.876	30.6531	41.5174	52.4427	71.1194	85.6458	90.1624	96.3269		27.9	0.53957	5.33083	7.92482	12.0447	16.9885	20.8643	25.4724	29.1651	35.5127	40.8228	49.2761	58.7366	68.0444	75.1856		28.25	-0.51294	5.85913	11.804	17.7122	23.425	28.552	33.7034	40.0266	47.5705	52.5388	61.45	72.8879	81.7258	92.407		28.6	-1.26963
27.25	1.02044	7.09344	10.9081	15.0891	20.216	23.6034	27.4792	30.4699	40.6017	52.0458	71.2109	86.2255	89.8876	94.9535		27.95	0.93629	5.30031	7.46706	11.8616	16.3782	20.437	24.8926	28.1274	35.0549	40.2429	48.5742	57.6379	65.2673	73.7512		28.3	-0.83042	5.68813	10.9494	17.2238	22.9855	26.9039	32.7755	38.7692	45.8126	51.4401	60.2414	71.2277	82.3727	93.4323		28.65	-1.08647
27.3	0.16585	6.3304	10.6029	14.9974	20.0938	22.7183	26.5941	30.5003	39.8692	51.6795	70.5699	85.6761	90.0706	93.7632		28	1.36354	5.26979	7.3755	11.4649	15.9204	19.9182	23.9771	27.6087	34.7498	39.6631	47.4756	56.6309	63.009	71.7676		28.35	-0.06148	6.10307	10.5831	16.4913	22.2286	26.0127	32.5069	37.5728	44.2623	50.8785	58.6177	69.3721	83.7398	94.4576		28.7	-1.3916
27.35	0.34885	5.84201	9.93137	14.3259	19.6054	22.4436	25.4343	29.8899	39.1672	52.5034	69.4406	84.3332	90.3452	93.3664		28.05	1.45509	5.20876	7.34499	11.0681	15.5237	19.2774	23.1226	26.8457	34.353	39.2664	46.5296	55.5628	61.4832	69.4483		28.4	0.04829	5.89546	10.1191	16.7231	21.8745	24.8286	31.9086	37.414	41.7719	49.9506	57.5434	67.8217	84.704	94.6772		28.75	-1.4831
27.4	0.68444	5.41466	9.87022	14.5089	19.3917	22.2909	24.8544	29.493	38.099	52.0455	69.2269	82.8988	90.223	94.3429		28.1	1.51613	4.72047	7.13136	10.763	15.0354	18.667	22.3596	26.1133	33.7122	38.7476	45.4004	54.1589	60.9033	67.312		28.45	0.20688	6.39585	10.412	16.1737	20.8612	24.0228	31.6034	36.8646	40.4168	49.8651	57.1161	67.724	84.826	94.909		28.8	-1.14735
27.45	0.65381	6.02491	9.29029	14.0205	18.6592	22.0161	24.5491	29.1572	37.9463	51.6487	68.8301	80.6099	89.0022	94.8921		28.15	1.36354	4.23219	7.22292	10.3662	14.9439	17.782	21.261	25.2588	32.9187	38.3203	44.3628	52.8162	60.7202	65.2368		28.5	0.18237	5.7854	10.2776	15.905	20.4338	22.9119	30.3459	36.6448	39.1594	49.7063	57.2869	68.0413	83.5198	93.2		28.85	-0.8116
27.5	0.9894	5.87221	9.25966	14.1425	18.6286	21.5583	25.0373	28.3637	38.1903	49.3598	69.715	79.7553	87.934	94.7699		28.2	1.14992	3.71339	7.16188	10.1526	14.7302	17.3547	20.3455	24.5569	31.637	37.7405	43.3862	51.2293	61.1475	63.6194		28.55	0.37759	5.23598	10.3385	15.026	19.213	22.6798	29.4059	35.424	38.5612	49.7916	57.006	68.1266	82.2013	90.2335		28.9	-0.3843
27.55	0.50101	6.45194	9.13749	14.2034	17.896	21.0393	24.3352	27.1429	39.1668	48.0779	69.8369	77.7715	86.5301	95.075		28.25	0.96681	3.34718	6.97877	10.0305	14.1809	16.958	19.8267	24.0381	30.2026	36.9776	42.3486	49.7034	61.7273	62.7039		28.6	0.42632	4.69878	9.80132	14.9405	18.9322	22.2891	27.6602	34.7159	37.8287	50.3531	55.8584	66.857	80.5411	86.9497		28.95	-0.44528
27.6	0.53143	6.17718	8.9848	14.2338	18.2316	20.551	23.8469	26.2577	39.1972	46.5519	70.9355	76.0624	84.8515	96.3566		28.3	0.6006	3.65236	6.8567	9.72536	13.7232	16.3782	19.3079	23.3362	29.1345	36.3367	41.3721	48.6353	61.3916	62.2461		28.65	0.23091	4.5522	9.33735	14.33	18.1508	22.1425	27.0864	33.6904	37.5234	50.5239	54.5644	66.1855	79.3691	84.6913		29	-0.75041
27.65	0.22615	5.90241	9.13728	13.898	18.0179	19.6353	22.2293	25.4337	39.5938	46.0941	71.0574	73.3157	84.5157	97.211		28.35	0.6006	3.95753	6.6736	9.35915	13.3264	16.012	18.7891	22.7869	28.0359	35.7569	40.5176	47.7503	60.5371	62.6733		28.7	0.26743	4.64975	8.59262	13.5121	18.0042	21.6053	26.4637	33.4217	37.3036	50.8167	53.0018	65.3919	78.1361	83.8123		29.05	-0.8419
27.7	0.71432	5.62765	8.86251	13.0129	17.9567	19.5131	22.0156	25.6167	39.6242	45.1784	70.4775	72.9494	84.2715	97.0583		28.4	0.50905	4.0796	6.49049	9.02345	12.7466	15.4627	18.3618	21.9019	27.334	34.8108	39.4495	46.9873	59.3775	63.3142		28.75	0.05981	4.32007	8.42163	12.7307	17.6623	21.0925	26.366	32.7502	37.5598	50.011	52.9407	64.8059	77.5256	82.7258		29.1	-0.71978
27.75	0.50059	5.44444	9.32017	12.3719	17.2547	18.9942	21.2831	25.7386	40.2955	44.5375	69.1957	71.6981	84.4544	96.631		28.45	0.50905	4.01857	6.45998	8.62672	12.4109	15.0354	17.782	21.0169	26.7236	34.0479	38.8086	46.6821	58.0957	63.5889		28.8	0.57241	4.66177	8.39712	12.1203	17.5036	20.421	26.0485	31.8102	38.1212	49.6691	52.4767	64.5983	77.6842	81.8957		29.15	-0.59766
27.8	0.04273	5.68848	9.28955	11.731	16.3696	18.7805	21.0388	25.8606	40.1123	44.6289	67.9138	72.0032	84.5764	95.4407		28.5	0.53957	3.74391	6.12428	8.53517	11.8005	14.9133	17.3547	20.2539	25.7776	33.407	38.3814	46.438	57.1191	63.8941		28.85	0.377	4.52739	8.7144	12.0835	17.4058	19.7618	25.9507	31.1021	37.6817	49.0953	52.0005	64.6104	77.3423	80.3208		29.2	-0.62812
27.85	0.16469	5.20009	9.59462	12.0971	15.9423	18.2616	20.0927	25.9826	40.4479	44.5372	68.2189	72.3998	84.1185	95.0743		28.55	0.47853	3.59132	5.81911	8.10792	11.2207	14.6997	16.958	19.5215	24.9841	32.7356	37.8626	46.0718	56.2952	64.2603		28.9	0.48677	5.17427	8.73872	12.0102	17.0395	19.3833	25.7187	30.4184	37.4374	48.7656	50.9873	64.9521	76.7319	78.7704		29.25	-1.05531
27.9	0.22562	5.19999	8.95365	12.3411	15.4539	18.3531	19.8179	26.4402	40.0205	45.5137	67.0286	74.2307	83.386	94.1587		28.6	0.50905	3.80495	5.60548	7.58913	11.0681	14.3335	16.3782	19.1553	24.5264	32.3084	37.4353	45.7666	55.3796	64.5654		28.95	-0.17251	4.89341	8.54331	12.3275	16.8685	18.7606	24.8275	30.5892	36.5951	47.911	49.8397	64.6102	74.9496	76.5487		29.3	-1.20785
27.95	1.14104	4.83367	8.80095	12.6157	15.9421	17.8952	18.7802	27.6608	40.3561	45.4526	66.1435	74.9936	81.86	94.4028		28.65	0.69215	3.80495	5.30031	7.46706	10.7935	13.9978	16.1646	18.7891	24.2517	31.5149	36.8555	45.3699	54.9829	64.9927		29	-0.01392	4.95434	7.61548	12.0222	15.8918	18.6506	24.4978	30.5525	36.0823	46.4949	49.9006	63.9387	73.3748	73.8142		29.35	-0.8721
28	1.35456	4.77253	9.07551	12.7376	15.2706	17.2237	18.5054	27.9048	39.5931	47.0089	65.1058	75.7869	81.5853	95.1656		28.7	0.75319	3.71339	5.30031	7.25343	10.6714	13.479	16.0425	18.5449	23.9771	30.5689	36.1536	44.9732	54.7998	65.3894		29.05	-0.25816	4.38052	7.18813	11.6071	16.0626	17.8937	23.8996	31.0529	35.5939	45.1886	50.5109	63.3161	71.0431	71.0675		29.4	-0.62791
28.05	1.56808	5.01656	8.8923	12.7986	15.4231	16.3691	18.3222	28.5456	39.9897	48.3515	64.0681	75.3901	80.7307	95.5622		28.75	0.81422	3.65236	5.4529	7.10084	10.3967	13.1128	15.8289	18.4839	23.4888	30.1416	35.7569	45.1257	54.22	65.7251		29.1	-0.03853	4.55132	6.773	10.5572	15.7452	17.9424	23.7896	30.4668	35.7159	44.0288	51.4629	63.4136	68.6871	68.4185		29.45	-0.41423
28.1	1.23228	4.92491	9.13633	12.829	14.7516	16.1859	18.3832	27.7521	39.3487	50.3351	64.068	75.1764	80.2728	96.1724		28.8	0.90578	3.28615	5.636	6.82619	10.1526	12.8992	15.5847	18.2703	22.3291	30.0501	35.4517	45.3394	53.335	66.3049		29.15	0.13227	4.85639	7.17573	10.3984	15.5742	17.6127	23.4233	30.1372	35.6914	44.0043	51.9389	64.329	66.978	66.8071		29.5	-0.53625
28.15	0.34717	5.65722	8.4038	12.0049	14.5684	16.0027	17.5896	27.6909	39.3486	51.4946	63.3354	73.9556	78.0754	95.2874		28.85	0.66164	3.10304	5.88014	6.58205	10.1526	12.4414	15.3101	18.2398	21.1084	30.0806	34.9329	45.7056	52.1753	66.5186		29.2	0.64487	4.84409	7.51743	10.3739	14.6707	17.5882	23.3377	29.6976	35.4349	44.0653	52.2074	64.9149	65.7572	65.5619		29.55	-0.84137
28.2	0.46913	5.71815	8.28163	11.486	13.9274	15.911	16.8571	27.0805	38.7077	52.1049	64.495	72.5516	76.7326	94.5243		28.9	0.6006	2.82838	5.78859	6.36842	10.1221	12.1973	14.8828	17.9651	20.0403	30.2637	34.6887	45.8582	50.8325	66.0913		29.25	0.8645	4.67309	8.07886	10.8132	14.1091	16.8069	23.0447	29.0994	35.8254	44.3948	51.6213	65.6838	65.2444	65.0979		29.6	-0.87183
28.25	0.10281	6.54202	8.12894	10.6009	13.6221	16.033	16.8264	27.8738	39.3484	52.1353	64.8916	71.2698	74.4741	92.5405		28.95	0.72267	2.55373	5.33083	6.33791	9.60329	11.8921	14.6387	17.782	19.4299	30.2637	34.8108	45.7361	49.7034	65.3589		29.3	0.8522	4.07485	8.29848	10.7399	13.6818	16.2331	22.6051	28.4523	36.1915	44.5534	50.6447	66.3063	63.9259	65.049		29.65	-0.71919
28.3	0.65203	6.54192	8.03728	10.4482	13.622	15.6056	16.9179	28.1789	38.9821	52.5624	65.3493	70.0185	73.7416	90.1601		29	0.84474	2.46217	5.20876	6.1548	9.02345	11.5869	14.3946	17.9041	19.7351	30.0806	35.2686	45.4004	48.7573	64.7485		29.35	0.38823	4.25786	7.93218	9.98296	13.3521	15.8545	23.0811	27.1338	37.2291	44.6631	50.7178	66.6236	62.7906	65.2198		29.7	-0.62759
28.35	0.98761	6.66388	8.61701	10.6617	13.1031	14.9952	17.4976	28.4229	38.8599	51.952	65.5628	69.2859	72.1851	87.5049		29.05	1.1194	2.43166	5.1172	6.18532	8.68776	11.5259	14.2725	17.5073	20.4981	30.2026	36.2146	45.1868	48.0249	64.3823		29.4	-0.10015	3.94038	7.40718	9.94624	13.1811	15.4272	22.5439	26.5844	37.2778	44.7973	50.5468	65.9521	61.8505	66.416		29.75	-0.38339
28.4	1.3232	6.29757	8.49483	10.6311	13.2861	13.6828	17.4975	27.6293	38.0664	51.9213	65.8374	67.7905	70.9338	85.4907		29.1	1.30251	2.27907	4.5984	6.27687	8.47414	11.4649	14.4861	17.1411	21.3831	30.2026	36.825	44.6985	48.0249	64.0466		29.45	0.51011	4.3187	7.02866	10.0682	12.3875	15.4149	22.3241	25.4369	37.2899	44.37	50.2049	64.0599	61.8138	67.307		29.8	-0.16971
28.45	1.3231	5.13779	8.7999	10.9361	12.8893	13.5607	17.8636	26.7442	37.3949	51.4024	67.18	66.7528	69.8961	84.3004		29.15	1.24147	2.46217	4.44582	6.24635	8.71828	10.9766	14.4861	16.7444	22.2986	30.2026	36.7944	44.2102	48.6658	63.6194		29.5	0.72974	4.3064	6.9187	10.5198	12.6926	14.7922	21.5061	25.0095	37.1067	44.0525	49.6921	62.0945	62.3264	67.551		29.85	-0.20018
28.5	0.86523	5.19872	8.21996	10.6919	13.469	13.4385	17.4058	26.0727	37.761	50.4563	67.0579	65.2878	70.1706	82.927		29.2	1.42458	2.76735	4.4153	6.36842	8.96242	10.4883	14.3335	16.1951	22.97	29.989	36.3672	43.905	49.4287	62.9175		29.55	1.03481	4.74575	6.40591	10.1657	12.3019	15.256	20.8468	25.1071	36.9113	43.6496	48.3493	60.5685	61.5939	67.0016		29.9	-0.07805
28.55	0.92616	4.71034	8.25038	11.0275	13.7741	13.7741	17.5888	24.5162	37.7304	48.9303	67.7902	65.0741	71.3302	81.462		29.25	1.42458	2.82838	4.26271	6.33791	8.90138	10.0916	14.0588	15.7373	23.3057	29.2871	35.6653	43.5999	50.2222	62.4597		29.6	0.50981	5.002	6.55229	9.59184	12.0943	15.4878	20.8345	25.168	37.0455	42.5874	47.1895	60.0923	60.5562	65.9517		29.95	-0.13904
28.6	0.92605	4.8323	7.97561	11.0274	14.3538	13.7129	17.0393	23.7227	38.3711	48.5945	66.722	64.5247	72.0015	79.3867		29.3	1.02785	2.91994	4.32375	6.1548	8.77931	9.6338	13.479	15.0354	23.6719	28.1885	34.6582	43.4473	50.6494	62.2461		29.65	0.37544	4.94087	6.45454	9.1645	11.9111	15.8417	21.103	25.8881	36.6547	41.5253	45.7612	59.6162	58.8349	65.4267		30	-0.44416
28.65	0.83439	5.07634	7.76188	10.7526	14.2927	13.8959	16.3678	22.0746	38.2184	49.1132	66.7218	65.4706	73.5883	78.6847		29.35	0.78371	2.91994	4.4153	5.84962	8.77931	9.48122	12.7771	14.5166	24.0381	27.2424	34.1394	43.5388	50.741	61.8494		29.7	0.09458	5.05063	6.66196	9.11558	12.0575	15.7928	21.5423	25.8392	36.4471	40.5121	45.5414	59.6893	57.3456	64.5111		30.05	-0.47462
28.7	1.35309	5.47296	8.15851	10.6609	13.7737	14.0484	15.4522	22.044	38.9813	49.6929	66.5081	66.0503	74.4122	79.3255		29.4	0.47853	2.82838	4.4153	5.57497	8.62672	9.38966	12.2583	14.4251	24.0076	26.3269	34.2004	43.6304	50.5579	61.0559		29.75	-0.0398	4.44019	6.07593	9.01782	11.8865	15.634	21.0662	25.9001	36.2883	40.5608	46.1638	60.385	56.845	64.3157		30.1	-0.5356
28.75	1.23091	5.83907	7.67012	10.4167	13.8347	13.8957	15.33	21.6777	38.7675	50.0896	66.9963	67.0878	75.999	79.7832		29.45	-0.04027	2.91994	4.44582	5.17824	8.38258	9.26759	11.77	14.3946	23.6719	25.4724	34.2004	43.3252	50.4053	60.1709		29.8	0.13101	4.25698	6.42983	8.50503	11.3615	15.7316	21.0539	25.6925	36.0685	41.0856	46.9938	59.9088	56.5763	64.1203		30.15	-0.84073
28.8	1.29184	5.19809	7.76157	10.6913	13.3768	14.2008	15.6351	22.0743	39.5304	50.181	66.3858	67.0267	76.3346	79.7525		29.5	-0.13182	2.95045	4.4153	5.17824	8.16896	9.32863	11.3733	14.364	23.031	25.1672	33.8953	42.898	50.1001	59.2859		29.85	-0.01558	3.9395	6.28325	8.71245	11.8619	15.3164	21.0782	25.2286	35.69	41.5982	48.2754	59.8355	57.211	63.8516		30.2	-0.84067
28.85	1.10863	5.25902	7.70043	10.1418	13.3462	13.7429	15.9707	22.1352	39.3472	50.6997	65.5007	66.813	77.0364	79.8745		29.55	-0.22337	2.76735	4.23219	5.54445	7.80275	9.60329	11.4649	14.6692	22.0545	25.1672	33.2849	42.5318	49.7949	58.0957		29.9	-0.04009	4.4521	6.45405	8.17524	11.6787	15.707	20.3579	25.082	34.7255	42.1718	48.9101	60.3237	57.5649	64.8647		30.25	-0.627
28.9	0.80335	5.65565	7.42567	10.1112	12.7357	13.6818	16.4283	22.3793	39.0114	50.486	63.7611	65.3785	76.67	81.7665		29.6	-0.07079	2.73683	4.23219	5.72755	7.65016	9.57277	11.6174	14.7608	20.9253	24.9536	32.4915	42.2876	49.7644	57.0276		29.95	-0.22329	4.452	6.34409	7.93101	11.8739	16.1952	19.5887	24.7157	34.6034	42.306	49.7767	60.1283	57.5404	66.2318		30.3	-0.53539
28.95	1.04739	5.83865	7.12038	10.5078	12.2779	13.3155	16.1231	23.7219	38.4314	50.9436	62.3267	65.5921	76.9141	82.6514		29.65	0.29543	2.64528	4.23219	5.636	7.3755	9.54225	11.5259	14.9744	20.0708	24.74	31.759	42.4402	49.5203	56.1731		30	0.03296	4.28101	6.77124	8.12622	11.7883	16.5491	18.3313	25.2649	34.7742	43.0994	49.6301	59.408	57.4182	66.2317		30.35	-0.4743
29	1.01676	6.1132	6.41838	10.2636	12.3998	13.2238	16.245	24.4237	37.6684	50.2111	62.1129	65.714	76.6698	84.2687		29.7	0.53957	2.40114	4.32375	5.48341	6.8567	9.35915	11.4343	15.2185	19.3689	24.5874	31.5759	43.0811	49.032	55.5628		30.05	0.04507	3.95132	6.41714	8.38247	11.5563	16.3292	18.0382	26.4733	34.1881	43.0016	49.1051	57.5524	57.1129	65.2062		30.4	-0.53528
29.05	1.41339	5.56378	6.60138	10.2025	12.2166	13.1016	15.7567	24.9424	38.0345	49.9974	62.8758	66.8126	76.9749	83.9939		29.75	0.53957	2.40114	4.50685	5.36134	6.42946	8.96242	11.2207	15.4321	18.7586	24.679	31.6675	43.7219	48.6658	55.5017		30.1	0.21587	3.18218	5.95317	8.63872	11.3853	15.4625	17.7207	27.462	33.6387	42.6231	49.1416	56.295	57.1128	64.5103		30.45	-0.80989
29.1	1.87105	4.86177	6.93696	9.53096	12.2775	12.5827	15.8176	23.9047	38.5227	49.2954	64.0048	66.6904	77.4326	83.9938		29.8	0.78371	2.40114	4.50685	5.08668	6.52101	8.80983	10.7324	15.7068	18.7891	25.0757	31.9422	44.0271	48.9404	55.3796		30.15	0.41108	3.59712	5.70894	8.26021	11.0434	15.145	17.9404	28.3286	32.7475	42.7939	48.9218	55.4892	56.9785	65.5844		30.5	-0.9319
29.15	1.04697	4.64804	7.24203	10.1717	11.6976	12.5521	15.6954	23.752	40.4146	49.5089	65.0118	66.5682	78.5921	83.4444		29.85	1.02785	2.3401	4.17116	4.99513	6.73463	9.17604	10.1221	15.249	19.1248	25.8997	32.522	44.2102	49.5203	55.1355		30.2	0.48423	3.78013	6.11167	8.4188	11.263	14.8397	18.7582	28.0355	32.4667	42.4764	48.7508	54.4881	56.4535	66.4022		30.55	-1.0234
29.2	1.291	4.49535	7.45555	10.3547	11.3923	12.1858	15.3596	23.935	40.7807	49.3867	65.439	65.3169	79.6907	83.2612		29.9	0.96681	2.30959	3.80495	4.72047	6.70412	9.51173	9.72536	14.6082	19.3994	26.6931	33.0713	44.1187	50.2832	55.105		30.25	0.88696	4.2439	6.42896	8.22339	10.8723	14.8152	19.4294	27.5959	32.2712	42.3665	48.5188	53.658	56.1726	66.0359		30.6	-1.35904
29.25	1.87073	5.2887	7.45545	10.0189	11.3922	12.3077	15.9393	24.1486	41.452	48.9594	65.4388	64.5844	80.8807	83.0475		29.95	1.02785	2.24855	3.49977	4.26271	6.97877	9.60329	9.29811	14.4556	19.552	27.334	33.3765	43.844	50.8325	55.7764		30.3	0.83804	4.09731	6.25796	8.46743	10.8234	15.0959	20.6012	27.1808	31.7829	41.8537	48.1281	52.486	55.5011	65.694		30.65	-1.45054
29.3	2.14528	5.68532	7.94362	10.0799	11.5447	12.4602	16.0613	24.6978	41.4214	48.8372	64.8284	62.8753	81.43	83.4441		30	0.99733	2.24855	3.34718	4.14064	7.28395	9.66432	8.80983	14.8523	19.7656	27.7918	33.3154	43.783	50.9546	56.5088		30.35	0.56938	3.87749	5.9771	8.94341	11.043	14.8882	21.2603	26.8145	31.2701	42.0489	48.0547	51.5948	55.8306	65.0225		30.7	-1.17583
29.35	2.11466	5.53263	7.913	9.62199	12.1244	12.7043	16.3053	24.3009	41.5129	48.6234	65.3166	62.5395	82.3149	84.7868		30.05	0.96681	2.27907	3.53029	4.38478	7.43654	9.60329	8.68776	15.0354	19.8572	27.8833	33.4375	43.5999	50.9241	57.0581		30.4	-0.12651	4.09712	5.1103	8.85786	10.8232	15.059	21.1625	27.0585	29.5732	42.9033	47.3955	51.2041	56.9291	64.4853		30.75	-0.8706
29.4	1.3211	6.14288	6.93633	9.62188	12.2159	13.2535	16.0611	24.3924	41.116	49.4168	66.0794	62.6919	83.2913	85.9463		30.1	0.96681	2.52321	4.01857	4.62892	7.22292	9.20656	8.87086	15.0965	19.9487	27.6697	33.407	42.9895	50.802	57.4243		30.45	-0.50503	3.98716	5.29331	8.86997	10.2494	14.8392	20.6253	26.8876	28.4867	43.3182	46.4432	51.3504	57.3441	65.1322		30.8	-0.62641
29.45	0.43598	5.92915	7.08882	9.53022	11.819	12.8566	16.3051	23.3852	40.1394	49.5693	66.9948	64.5839	84.6034	86.9838		30.15	1.05836	2.52321	4.04909	4.84254	6.70412	8.9319	9.14552	15.0965	20.1929	27.2424	33.5291	41.9824	50.5274	57.4854		30.5	-0.19995	4.43872	5.29321	8.24732	9.94409	14.7781	19.7585	27.2048	28.0227	43.8552	46.1257	52.2781	57.7835	65.7058		30.85	-0.41273
29.5	0.06967	5.89853	7.18026	9.40805	11.4527	12.704	16.4881	22.8663	39.8341	50.5152	67.0863	66.0182	84.878	86.3123		30.2	1.02785	2.3401	3.80495	4.96461	6.03273	8.59621	9.32863	15.2185	20.1624	26.9373	33.8342	41.2805	50.2222	57.4549		30.55	0.06851	4.25552	5.74478	8.24722	10.4079	14.5949	19.3922	27.4611	28.8283	44.0504	45.5397	52.8273	57.7467	65.4982		30.9	-0.50423
29.55	0.1306	5.44066	7.24119	9.46898	10.6286	12.5818	16.3965	22.8052	39.1321	50.393	67.4524	68.1238	85.1831	85.5493		30.25	0.81422	2.27907	3.59132	4.75099	6.00221	8.04689	9.29811	15.6152	20.1319	26.6321	34.0784	40.9143	50.1306	56.9971		30.6	0.55669	3.96245	5.52495	8.17388	10.188	13.5694	19.5142	27.5953	30.7325	43.855	44.7461	52.8882	57.7344	64.4361		30.95	-0.62625
29.6	0.28308	5.37952	7.57678	9.1637	10.8727	12.0934	16.5795	23.1713	39.254	50.7591	68.0931	69.3138	85.5492	84.6031		30.3	0.44801	2.3401	3.34718	4.29323	6.52101	7.55861	8.9319	15.4932	20.2539	26.5711	34.2615	40.9448	50.2222	56.3562		30.65	0.3979	3.92573	5.35396	7.92964	9.69966	12.9956	19.3798	27.9858	31.4038	43.5376	43.6474	53.4741	58.8085	63.1542		31	-0.59568
29.65	0.61867	5.7151	6.99684	9.04152	10.5979	11.6966	16.793	23.8425	38.7656	51.1558	69.802	70.1377	86.6477	84.3589		30.35	0.05128	2.30959	2.98097	4.04909	6.91774	7.40602	8.84035	15.1575	20.5591	26.6016	34.231	41.0059	50.2527	55.5933		30.7	0.50767	3.74253	4.95103	7.78306	9.84605	12.1288	19.2455	27.5096	31.5746	43.2567	42.2191	54.2918	59.492	62.5926		31.05	-0.44303
29.7	0.64908	5.40982	7.02726	8.70572	10.5368	11.0556	17.2506	23.6593	39.4369	51.0336	71.2668	70.5343	87.0443	83.3822		30.4	0.02077	2.40114	3.04201	3.86598	7.07033	7.52809	8.90138	14.8828	20.8643	26.7847	34.0784	40.9448	50.1001	54.7083		30.75	0.59302	3.87671	4.96314	7.44116	9.69946	12.0432	18.9646	27.5706	32.2703	42.3533	42.0725	55.5491	60.3342	62.4949		31.1	-0.59557
29.75	1.28985	4.49419	6.44732	8.33941	10.8724	11.1775	17.3116	24.117	40.8711	50.24	72.1211	70.8394	87.563	82.8328		30.45	0.4175	2.46217	3.28615	3.62184	7.1924	7.49757	8.99293	14.364	21.1084	26.8762	33.6816	40.5481	50.1306	53.9758		30.8	0.26333	3.8522	5.30483	7.77066	9.73599	12.5924	18.818	28.0587	33.3322	41.5841	41.8405	55.8786	61.506	62.4093		31.15	-0.565
29.8	1.22871	4.09736	5.77582	8.55292	10.9638	11.1164	17.0368	23.5676	41.6645	48.5615	71.5107	71.175	87.3798	82.8022		30.5	0.78371	2.27907	3.22511	3.49977	7.00929	7.46706	9.20656	13.8147	21.4746	26.9678	33.407	39.8767	50.0391	53.6401		30.85	0.2022	3.76665	4.99956	7.6729	9.72368	12.4825	18.6959	28.3028	33.6739	40.7173	41.462	55.3047	62.0064	62.7144		31.2	-0.56494
29.85	0.89291	4.24984	5.5621	8.73592	11.391	11.452	16.8536	23.4759	42.3968	47.4932	70.8392	71.0223	87.5018	83.565		30.55	0.99733	2.24855	3.43874	3.3777	6.55153	7.22292	9.57277	13.6011	21.7493	27.1509	33.3765	39.419	49.4592	53.396		30.9	-0.35942	3.48579	5.43892	7.64839	9.394	12.3847	18.1709	28.6323	32.9169	40.5952	41.3398	54.4746	62.0795	62.5434		31.25	-0.56489
29.9	0.7097	4.34129	5.53147	8.7053	10.75	12.0622	16.3957	22.8655	41.5727	46.2724	69.893	72.2734	87.4101	84.9382		30.6	1.05836	2.157	3.43874	3.34718	6.24635	7.07033	10	13.479	21.9019	27.3035	33.5291	39.1443	49.093	53.457		30.95	-0.27407	2.91196	5.67075	7.8314	9.55259	12.5311	18.3294	28.2904	31.8915	40.2411	40.6927	53.3392	62.5433	63.1659		31.3	-0.68691
29.95	0.25183	4.40222	5.77551	8.8883	10.3226	11.6654	16.4872	22.2855	41.1454	45.9366	69.8929	72.9752	88.0204	86.1588		30.65	0.84474	1.88234	3.22511	3.49977	5.94118	7.31447	10.3967	13.4485	22.0545	27.7918	33.468	39.2358	48.7268	53.6707		31	-0.43286	3.19263	5.73169	7.52612	9.46704	13.4465	18.3782	27.741	31.8303	39.9114	39.8381	52.4602	62.6531	63.9958		31.35	-1.26669
30	0.34328	4.00538	6.44679	8.46095	10.6277	11.7569	16.6397	22.2244	39.8941	45.2957	69.7097	74.562	87.8982	87.8372		30.7	0.99733	2.00441	3.16408	3.65236	5.54445	7.7112	10.8545	13.7842	22.1765	28.3106	33.6206	39.3274	48.2691	53.4876		31.05	-0.27427	3.4855	5.43862	7.33071	10.0285	14.0446	18.2194	27.631	31.5861	40.5827	39.4352	52.7653	62.714	64.2155		31.4	-1.44974
30.05	0.58731	4.37149	6.4772	8.36929	10.414	11.5736	16.6396	21.797	38.6122	44.1969	70.6557	75.2638	88.2338	89.3019		30.75	0.90578	1.97389	2.98097	3.65236	5.39186	7.95534	10.7324	13.9368	21.9324	28.6157	33.5596	39.0528	48.1775	53.2739		31.1	0.34819	3.54644	5.09673	7.51372	10.3824	14.0567	18.6099	27.4844	31.3052	41.4004	39.5572	53.461	62.3355	64.1666		31.45	-1.96848
30.1	0.55669	4.61553	6.75176	8.06401	10.5359	11.7566	17.0667	21.7054	38.368	42.8541	70.6556	75.8741	88.3863	91.5906		30.8	0.72267	2.37062	3.07252	3.80495	4.99513	8.04689	10.4578	14.4251	22.1765	28.7073	33.4375	38.5645	47.8113	52.8467		31.15	0.64107	3.90034	5.35298	7.50142	10.0405	13.8979	18.5488	27.0693	31.7446	41.852	40.8388	54.0957	61.9936	64.5815		31.5	-1.99895
30.15	1.07538	4.09662	7.20941	7.94184	10.5663	11.7565	16.8835	21.4306	37.5134	41.3281	71.571	75.4162	89.4543	93.9404		30.85	0.4175	2.49269	2.98097	3.59132	4.75099	7.7112	10.3967	14.7913	22.2681	28.6157	33.5901	38.1067	47.3535	52.9382		31.2	1.00718	3.49741	5.25523	7.89195	10.4188	13.8978	18.5365	26.8006	32.0741	42.096	42.5233	54.4007	61.9325	65.3871		31.55	-2.02941
30.2	1.2889	4.18807	6.75155	8.33846	10.6883	10.9935	16.8224	21.2779	36.9639	41.4806	71.6014	74.1954	90.9801	97.2056		30.9	0.32594	2.6758	2.88942	3.68288	4.72047	7.49757	9.9695	15.1575	22.146	28.28	33.4986	37.6184	47.0483	52.9382		31.25	0.48218	3.21655	5.04761	7.42798	10.6018	14.2517	18.6707	26.6296	32.4402	41.5344	43.1335	53.7903	61.8347	66.3391		31.6	-1.44952
30.25	0.86155	4.31003	6.23264	8.00266	11.4206	10.6577	16.1203	22.2238	35.6821	41.8772	73.0051	73.4018	92.4448	100.471		30.95	0.26491	2.61476	2.76735	3.59132	4.78151	7.31447	10.061	15.3711	22.146	28.1274	33.5596	37.5879	46.8347	52.9993		31.3	-0.07944	2.91128	4.60806	7.12271	10.8947	14.7643	19.0124	26.6295	32.6964	40.4601	43.4142	53.2531	61.8835	66.6808		31.65	-1.1443
30.3	0.98351	4.55407	5.77477	7.78893	11.9088	10.2303	15.9066	22.9257	35.0716	43.6776	74.2257	72.7303	93.818	103.95		31	0.17336	2.70631	2.73683	3.62184	5.17824	7.31447	10.3357	15.249	21.9324	28.219	33.5291	37.2827	46.8653	52.8467		31.35	-0.07954	3.13091	4.96196	7.40337	10.9922	14.6788	19.3174	26.3243	32.7696	39.6544	43.5728	54.3882	62.4571	65.399		31.7	-0.80855
30.35	1.07496	4.88966	6.01881	7.84986	11.8782	9.95558	15.9675	23.3223	34.0339	44.593	76.3618	73.3406	94.6724	106.086		31.05	0.23439	2.70631	2.8589	3.34718	5.20876	7.55861	10.5188	15.4627	22.1765	28.4937	33.2544	37.0081	46.7737	52.2669		31.4	-0.49468	3.89986	5.13277	7.13472	10.3208	14.4589	19.2929	25.1889	33.1967	39.4834	43.4995	55.6333	62.9087	64.581		31.75	-0.90005
30.4	0.8002	4.73697	6.5375	8.0939	11.9696	10.0165	15.6623	23.6884	32.8742	45.2948	77.2467	73.9508	96.2897	107.184		31.1	0.38698	2.64528	2.91994	3.13356	5.42238	7.7112	10.3967	15.4627	22.3291	28.8599	32.9798	36.6724	46.9263	51.9922		31.45	-0.59243	3.96079	5.09605	7.12241	9.95445	14.0438	19.0487	25.201	32.8426	39.7396	44.0121	56.8172	62.3959	64.7274		31.8	-0.93051
30.45	1.10527	4.37065	6.04912	8.00224	11.1761	9.95537	15.9978	23.5662	32.752	46.3323	77.6739	75.3545	96.8999	106.727		31.15	0.38698	2.40114	3.13356	3.04201	5.17824	7.83327	10.1526	15.8289	22.7258	28.9514	32.3999	36.5808	46.7127	51.7175		31.5	-0.49487	3.91187	5.30347	6.87818	9.31958	13.6043	19.5979	25.0422	32.0857	39.6785	44.9397	57.7449	62.0051	64.9226		31.85	-1.14408
30.5	1.1662	4.34003	5.71332	8.09369	10.3825	10.6877	15.8452	23.5051	32.172	46.9731	77.8874	75.8732	97.3881	106.635		31.2	0.6006	2.3401	3.34718	3.04201	5.05617	7.65016	9.90846	16.1646	22.8784	29.2871	32.0337	36.5808	46.5906	52.1143		31.55	-0.0311	3.46011	5.15689	6.93911	8.98989	13.8971	19.7565	24.9689	31.7194	38.2135	45.5011	58.3185	61.883	64.6539		31.9	-0.9304
30.55	1.04402	4.06526	5.92684	7.941	9.49739	11.2369	15.9061	22.9556	32.172	48.1021	78.4671	76.1783	96.6861	107.733		31.25	0.57008	2.03493	3.22511	2.91994	4.56789	7.28395	9.66432	16.6529	22.6953	29.1651	31.3928	36.4282	45.9802	52.2058		31.6	0.10308	3.00835	5.38872	6.95122	9.42925	13.5919	19.2925	24.7491	31.6827	37.2002	46.1724	58.8799	61.6509	64.2754		31.95	-0.80828
30.6	1.25754	3.75998	5.56052	7.87986	8.73435	11.2673	16.0891	23.5049	32.2024	48.4682	79.1689	76.6359	97.1438	109.534		31.3	0.78371	1.79079	2.95045	3.13356	4.62892	6.76515	9.57277	16.6223	22.3596	29.0735	31.3318	36.1536	45.492	52.3279		31.65	-0.12895	3.42329	5.80366	6.82905	9.86861	13.4331	19.3413	23.9921	31.9267	36.8462	46.0991	59.8808	61.4189	64.8369		32	-0.62512
30.65	1.34899	4.21764	5.49938	7.60509	9.25304	11.4808	15.7533	24.9696	32.2633	48.8038	79.2298	77.0326	96.8385	112.25		31.35	0.6006	1.27199	2.55373	3.07252	4.72047	6.24635	9.26759	16.2561	22.0239	28.8294	31.4233	36.1231	44.668	51.9312		31.7	0.1273	3.65513	5.6815	7.4271	9.64878	13.7015	19.1947	23.9676	32.4271	36.2723	45.5741	59.9173	60.9305	66.619		32.05	-0.86921
30.7	1.31837	4.40064	5.83497	7.20826	9.64966	11.9385	15.8142	25.2136	33.0872	47.9797	79.2602	77.887	96.6553	114.661		31.4	0.78371	1.1194	2.40114	3.25563	5.30031	5.94118	9.14552	15.9509	21.8103	28.7683	31.8201	36.1231	44.1492	51.4429		31.75	0.469	3.74048	5.20532	7.31714	9.30689	13.5061	19.4143	24.6023	32.2439	36.0525	45.7449	59.4412	60.0881	69.0237		32.1	-1.23537
30.75	1.50137	4.73623	5.5602	8.12368	10.1073	12.1215	15.8141	25.6408	34.1552	46.4232	78.8939	78.4972	96.2584	115.851		31.45	0.72267	1.08888	2.18752	3.01149	5.54445	5.78859	8.84035	15.5847	21.5967	28.3411	31.9422	36.4893	43.4473	50.8325		31.8	-0.11704	3.58169	4.76577	6.93863	8.58657	13.3595	19.695	24.6266	32.1217	36.3576	46.0378	59.6242	59.319	70.4762		32.15	-1.35738
30.8	1.62333	5.13285	5.98735	8.30668	10.4429	12.6402	15.2952	25.7933	35.0706	45.8128	79.4737	79.9009	95.1902	115.729		31.5	1.02785	1.36354	2.49269	3.16408	5.66652	5.88014	8.50465	15.4932	21.5051	27.9444	32.2168	36.4282	43.2336	50.4663		31.85	-0.19038	3.09331	5.10747	7.19488	8.63531	13.0909	19.3287	24.419	32.1827	37.1265	46.7212	59.856	57.9273	70.9034		32.2	-1.29629
30.85	1.25702	5.19378	6.84173	7.66571	9.95452	11.8466	15.173	26.0068	35.162	45.2634	79.0768	81.6708	94.8849	115.912		31.55	1.39406	1.48561	2.79787	3.28615	5.42238	5.91066	8.01637	15.0049	21.3831	27.5476	32.583	36.2756	42.8369	50.4663		31.9	-0.11723	2.65376	5.24165	7.42671	9.07466	12.7734	18.8525	24.8584	31.6577	38.3715	47.6367	59.685	56.853	69.5849		32.25	-0.93003
30.9	1.22639	4.52229	7.20784	7.4825	9.34407	11.1751	15.3865	26.3118	34.399	45.3853	78.8631	83.7459	94.3966	116.308		31.6	1.33302	1.54665	3.13356	3.74391	5.08668	6.18532	7.7112	14.6692	21.5051	27.1204	32.7051	35.6348	42.8064	50.3748		31.95	0.29771	2.5438	5.18052	7.03599	9.12339	12.8099	18.5594	25.0414	31.3524	39.3236	47.9295	59.0379	56.4745	67.7293		32.3	-0.65532
30.95	1.47043	4.18649	7.42136	6.811	9.13034	10.8698	15.5085	25.854	34.2158	45.5988	77.9169	85.3022	94.0302	117.468		31.65	1.39406	1.85182	3.25563	3.92702	4.9341	6.33791	7.80275	14.303	21.9019	26.7542	32.3694	35.177	42.5928	50.5274		32	0.63941	2.29956	5.30249	6.65747	9.1355	12.9929	18.364	25.615	31.9382	39.7263	47.5388	57.9758	55.8762	67.363		32.35	-0.35009
31	1.28722	3.3319	6.78038	6.84142	8.91661	10.8087	15.5084	26.159	34.4598	45.5377	77.5506	85.6683	93.2061	118.383		31.7	1.21095	1.97389	3.1946	3.8965	4.90358	6.79567	7.7112	14.3335	22.1765	26.2964	31.4844	34.5056	42.3792	50.2832		32.05	0.65152	2.45816	5.1315	6.25454	8.69595	13.0661	18.4982	26.213	32.5729	40.5685	47.0626	57.0846	55.0705	68.0832		32.4	-0.25848
31.05	1.59229	2.90454	5.74268	7.45166	9.09961	11.3884	14.7454	26.1895	34.7344	45.9954	77.0012	86.1565	92.9924	118.871		31.75	1.14992	2.30959	3.25563	3.74391	5.02565	6.79567	7.77223	14.7302	22.3596	26.2354	30.874	34.353	42.0435	50.1917		32.1	0.90777	2.58013	5.39995	6.21782	8.00005	13.2491	19.2916	26.0054	33.0123	41.8013	45.9761	57.17	54.6431	69.7188		32.45	-0.22791
31.1	2.20253	3.63686	5.6205	7.75673	9.52675	11.602	15.3861	26.0062	34.7953	46.3615	76.6959	86.0648	93.6637	118.536		31.8	0.78371	2.27907	3.13356	3.46925	4.87306	6.70412	7.49757	14.8828	21.8408	25.9302	30.2332	34.0479	41.7383	49.5508		32.15	0.60249	2.6899	4.97261	6.38863	7.51167	12.6386	19.5112	26.164	32.8779	42.6557	44.3647	57.0722	54.3989	72.4409		32.5	-0.38045
31.15	2.20243	3.97245	5.65092	7.51249	9.40458	11.4187	16.3321	25.6704	33.7881	46.7886	76.6043	85.2408	94.335	116.277		31.85	0.72267	2.18752	3.22511	3.74391	5.02565	6.45998	7.61964	15.3101	21.5357	25.5335	29.989	34.0479	41.5857	49.1846		32.2	-0.33755	3.66636	4.81382	6.26646	6.96226	12.0282	19.6576	26.2005	32.4383	43.5223	42.9852	56.5716	54.2767	75.8832		32.55	-0.71609
31.2	2.04974	4.21649	5.46771	8.0617	9.89275	11.3881	17.0644	25.7009	33.4523	47.0021	75.8107	83.8674	95.3725	114.171		31.9	0.75319	2.27907	2.95045	3.68288	5.20876	6.1548	7.55861	15.4321	21.1389	24.5874	29.6228	34.0784	41.7993	48.5742		32.25	-0.50854	3.9104	5.17993	6.52271	6.91333	11.7717	19.7795	25.8464	32.7556	44.1448	42.2527	56.364	54.3621	78.4587		32.6	-0.8381
31.25	2.5074	4.85725	5.52864	8.18366	9.86213	11.6321	17.4915	25.7313	33.2691	46.2391	75.5665	82.2803	95.1893	112.065		31.95	0.84474	2.43166	2.79787	4.11012	5.4529	5.97169	7.80275	15.7068	21.4441	24.0686	29.5008	34.0479	42.5012	48.4522		32.3	-0.80161	3.82486	5.14322	6.63247	7.34048	11.442	19.633	25.3825	33.549	44.5353	41.984	56.1808	54.362	80.4118		32.65	-0.83805
31.3	2.72091	5.34542	5.43698	7.96994	9.6484	12.0593	16.7895	26.4941	33.4826	46.0864	75.2001	82.2802	95.2807	110.234		32	1.1194	2.61476	2.64528	4.04909	5.57497	5.66652	7.83327	16.012	21.5357	23.6108	29.104	33.9563	43.2336	48.4522		32.35	-0.6186	3.70269	5.33843	6.669	7.57232	11.7105	19.5352	25.1138	33.8907	45.0845	41.8863	55.961	54.1055	81.4371		32.7	-0.56334
31.35	2.90391	5.43687	5.19273	7.81724	10.1671	12.7611	16.1485	26.6771	33.8182	46.2694	75.3221	82.5548	95.7384	109.166		32.05	1.02785	2.52321	2.95045	3.92702	5.72755	5.75807	7.80275	16.2561	21.7188	23.6108	28.7378	33.5901	44.0881	48.6353		32.4	-0.43559	3.44624	5.00874	7.09615	7.75533	12.1743	19.2055	24.833	34.6108	45.8657	41.2636	55.2285	53.9834	81.0341		32.75	-0.68535
31.4	3.02588	5.07056	5.13159	7.26782	10.0754	12.2422	16.301	26.4329	32.9331	47.1848	74.9863	82.8293	96.3791	108.769		32.1	1.30251	2.58424	3.16408	3.71339	5.91066	5.78859	7.7112	16.6223	21.7493	23.5498	28.158	33.5291	44.668	48.7573		32.45	-0.39907	3.44615	5.15513	7.05943	8.36558	12.0399	18.6805	25.2845	35.3797	46.3539	40.3236	54.7889	54.1053	79.1664		32.8	-0.77685
31.45	2.47646	4.58217	5.19252	7.11513	10.1364	12.0895	16.423	26.4938	32.994	48.5275	75.1693	82.3715	96.9589	108.464		32.15	1.36354	2.40114	3.10304	3.71339	5.94118	6.27687	7.55861	16.5308	21.9019	23.794	27.8833	33.6206	45.3394	49.0015		32.5	-0.22827	3.55591	5.24048	6.49781	8.3899	11.8079	18.9734	26.0901	35.4041	46.6956	39.7742	54.8376	54.4226	77.6038		32.85	-1.23456
31.5	2.44583	3.81913	5.40604	7.35916	10.0752	12.1809	16.7281	25.8833	33.2991	48.802	74.864	81.6084	96.1958	107.243		32.2	1.79079	2.43166	3.01149	3.86598	6.09376	6.61256	7.7112	16.6834	21.9324	23.9771	27.8223	33.8037	45.7056	49.1236		32.55	-0.14292	3.26285	5.00845	6.40005	8.09683	11.7345	19.5714	26.5783	35.1232	46.4879	39.5788	56.1803	54.9718	76.2731		32.9	-1.32606
31.55	2.07952	4.06316	5.95525	7.42009	9.95305	11.6926	17.0026	25.3034	33.6957	49.8395	74.2231	81.3642	94.8224	106.663		32.25	1.66872	2.40114	3.07252	3.80495	5.91066	7.13136	7.74171	16.5003	21.9324	24.1907	28.1274	33.8342	46.0718	49.2151		32.6	-0.24067	2.98199	4.95953	6.42437	8.0357	11.3926	19.8399	27.2129	34.7325	45.3404	39.6031	58.1212	55.4722	75.4429		32.95	-1.44808
31.6	1.95734	4.58185	6.38239	6.93171	9.40363	11.2957	17.1551	24.2962	34.8248	50.2972	73.6126	80.5706	93.327	105.778		32.3	1.76027	2.52321	3.53029	3.86598	5.75807	7.25343	8.16896	16.3477	22.0545	24.2822	28.2495	33.9868	45.7971	49.2151		32.65	-0.02104	3.25044	4.95943	6.44869	8.10884	11.4536	19.9008	27.3105	34.7568	44.1684	40.4575	59.8422	55.6308	75.5039		33	-1.14285
31.65	1.68258	5.03951	6.47384	7.41988	9.25094	11.1125	17.8264	23.1975	35.5571	50.5717	73.5209	80.2043	92.4419	104.679		32.35	1.57716	2.43166	3.80495	3.56081	5.39186	7.43654	8.32155	16.134	22.207	24.2517	28.4326	33.9563	45.5225	49.3372		32.7	0.35728	3.23814	5.21568	6.41197	8.51158	11.7953	20.1815	27.2616	34.8177	43.2894	41.8856	61.368	56.0091	75.5282		33.05	-1.11228
31.7	1.40782	5.22251	6.07701	7.38926	8.54893	11.204	17.7958	22.9837	35.557	50.6022	74.65	79.5938	92.6248	103.794		32.4	1.6382	2.61476	3.71339	3.56081	5.60548	7.1924	8.87086	16.2256	22.5122	24.0686	28.3106	34.0479	45.0952	49.3677		32.75	0.25953	3.6897	5.26441	6.26539	8.41382	11.5754	20.2546	26.9563	34.9641	42.801	42.9597	61.4778	56.5339	75.0886		33.1	-0.80705
31.75	2.10962	5.16137	5.83276	7.38916	7.93847	11.6616	16.9412	22.77	35.5874	49.6255	75.0161	79.4411	92.5027	102.421		32.45	1.45509	2.6758	3.13356	3.1946	5.72755	7.22292	8.99293	16.7444	22.6038	23.794	28.4326	34.0479	45.2783	49.6729		32.8	0.06412	3.60415	4.70279	6.17984	8.03531	11.612	20.0226	27.0417	34.7565	42.4958	43.7043	60.7575	55.9357	74.4904		33.15	-0.74596
31.8	1.71278	4.88661	5.10023	7.84682	7.93837	11.8751	16.9105	22.8004	35.099	48.3742	75.0465	80.4481	92.5331	101.139		32.5	1.54665	2.8589	2.82838	3.04201	6.03273	7.03981	9.29811	16.958	22.6343	23.5803	28.3411	34.292	45.2478	49.5203		32.85	-0.20454	3.51861	4.18999	6.53374	7.97417	12.21	19.3145	26.8218	34.7076	43.0938	43.9239	59.9273	54.6905	74.3804		33.2	-0.53228
31.85	1.74319	4.64236	5.10013	7.6636	8.06033	11.814	17.002	23.0139	34.5496	47.5196	74.3445	80.9973	92.1057	99.1858		32.55	1.33302	2.70631	2.6758	2.64528	5.97169	6.8567	9.20656	17.0191	22.3291	23.1531	28.4631	34.5972	45.5225	49.4898		32.9	-0.26567	3.70162	4.10445	6.39937	8.42574	12.3442	18.4721	26.5532	34.4389	43.7163	43.5942	59.5	53.8725	74.5512		33.25	-0.74585
31.9	0.73601	4.15398	5.31365	7.1447	8.27385	11.7223	17.2765	23.0749	34.1222	46.0851	73.5204	81.7297	92.777	97.6598		32.6	1.36354	2.43166	3.01149	2.73683	5.84962	6.27687	9.35915	16.4697	21.8408	22.9395	28.1274	35.116	45.7666	49.0015		32.95	0.10044	3.87242	4.3729	6.36265	8.42564	12.161	18.2889	26.5409	33.6454	43.7406	43.0448	58.328	53.1156	74.8563		33.3	-0.83735
31.95	0.98004	4.06232	5.34406	7.02252	8.48737	11.5696	17.6732	22.1592	33.5118	45.2916	73.1541	81.7601	94.1197	97.2325		32.65	1.27199	1.91286	3.10304	2.79787	5.33083	6.06325	9.38966	16.1035	21.2305	23.0615	28.0664	35.7263	46.1939	48.8489		33	0.27124	3.93335	5.36158	6.80201	8.48658	11.8923	18.4597	26.4187	32.9495	43.6795	42.6052	56.9241	52.4685	75.9548		33.35	-1.23403
32	0.67476	4.79464	5.19137	7.60225	8.76192	11.2033	17.3679	22.0981	34.2746	44.8947	72.1469	81.6989	94.6384	97.4765		32.7	1.39406	1.66872	3.43874	3.22511	5.1172	5.81911	9.81691	15.4932	20.6812	23.3057	27.8223	36.001	46.4075	48.4522		33.05	0.3566	3.93326	5.32486	6.87515	8.43765	11.5504	18.6549	26.0524	32.4733	43.5451	42.4953	55.6789	51.8825	77.3341		33.4	-1.20346
32.05	1.4376	4.88608	4.85557	7.5106	8.54819	11.5694	16.9405	21.8844	35.2511	44.5589	72.3299	82.1566	95.5538	98.8802		32.75	1.33302	1.48561	3.46925	3.40822	4.78151	5.97169	9.93898	15.6152	20.5286	23.6108	27.7307	35.6958	46.3464	48.6048		33.1	0.91802	3.92095	4.94634	6.44781	7.76617	11.3306	18.8013	25.6006	32.6563	43.252	42.5806	54.8609	52.0411	78.1641		33.45	-1.2034
32.1	1.07128	4.79443	4.94701	7.81567	9.06689	11.5693	16.9404	22.1284	35.2815	45.4133	71.6584	81.7292	95.8894	99.4905		32.8	1.57716	1.51613	3.56081	3.59132	5.14772	5.88014	10.0305	15.5847	20.4981	23.5498	27.4256	35.0549	46.2244	48.7573		33.15	0.77144	3.49361	5.0439	6.35005	7.42427	11.4282	19.2773	25.5517	32.7661	43.0078	43.2519	53.8232	52.2851	77.8833		33.5	-0.80662
32.15	2.04774	4.12293	5.40467	7.93763	9.28041	11.4777	16.7267	22.8912	35.2814	46.5119	70.8344	80.8441	96.4081	101.321		32.85	1.27199	1.69923	3.40822	3.22511	5.30031	5.91066	9.93898	16.134	20.5286	23.5498	27.4256	34.6582	45.6445	49.093		33.2	0.23423	3.71324	4.84849	6.10582	7.14341	11.4891	19.2406	25.869	33.1688	42.9588	43.7401	52.6512	52.639	76.992		33.55	-0.77605
32.2	1.80349	4.64163	5.92337	7.90701	9.09719	11.1724	15.8721	23.5015	34.9761	47.3662	69.9187	79.5318	97.0489	104.343		32.9	1.08888	2.00441	3.46925	2.98097	5.57497	5.75807	10.3662	16.4087	20.2539	22.97	27.273	34.5667	45.2783	48.9404		33.25	0.47828	3.56666	4.6775	5.51978	6.98462	11.7088	19.0696	26.1985	33.4983	42.1165	44.1795	52.2483	52.6511	75.7835		33.6	-0.68444
32.25	2.04753	4.73308	5.49602	7.7238	8.9445	10.4399	15.933	23.4403	34.6098	48.5868	69.0336	78.6161	96.8656	107.913		32.95	0.72267	1.94337	3.25563	2.6758	5.33083	5.97169	10.4578	16.6223	20.1929	22.4512	27.395	34.9939	44.5459	48.8184		33.3	0.50259	3.2858	4.32339	5.60513	7.1188	12.1237	19.1916	25.8566	33.9987	41.4084	44.1427	52.2116	52.4801	75.9543		33.65	-1.11164
32.3	2.13898	4.88556	6.10626	7.388	9.1275	9.85992	15.994	23.2877	34.1519	48.4036	69.6744	78.4634	97.0486	111.972		33	0.96681	2.03493	3.13356	2.61476	5.05617	5.84962	10.5493	16.134	20.0708	21.6577	27.5476	34.8108	44.2713	48.7878		33.35	0.80767	3.4688	3.99371	5.45855	7.92437	11.9161	19.8262	24.9654	34.3038	41.1519	43.5567	52.4312	52.6754	77.6753		33.7	-1.29469
32.35	2.26094	4.42769	6.16719	7.3879	9.21895	10.104	16.299	22.9213	33.9687	48.0678	69.8574	78.2802	96.1025	114.199		33.05	0.93629	2.12648	2.88942	2.49269	4.56789	5.91066	10.3357	15.8594	20.1929	21.6272	27.7612	34.4751	43.6609	48.7878		33.4	1.13716	3.70064	4.26216	5.373	8.25386	11.6108	20.1435	24.5747	34.2548	41.4082	41.9575	52.4067	53.1635	79.018		33.75	-1.53877
32.4	2.96274	4.42759	6.13657	7.17417	8.76108	10.6837	17.367	22.3719	34.0907	47.5184	70.8338	77.1815	94.9427	116.091		33.1	1.27199	2.52321	2.76735	2.98097	4.32375	5.81911	10.0916	15.8289	20.0098	21.5967	27.7307	33.7122	43.4168	48.6963		33.45	0.83189	3.7982	4.56724	5.78794	8.75425	11.5008	20.1922	24.6478	34.0106	42.1649	40.6268	52.3089	53.2977	79.9457		33.8	-1.47769
32.45	1.95556	4.00023	6.01439	7.05199	9.03563	11.3245	17.8247	22.2497	35.1892	47.03	71.1084	76.6016	94.1797	117.434		33.15	1.30251	2.58424	2.76735	3.49977	4.11012	6.18532	9.9695	15.8899	19.7962	21.9019	27.9138	33.5291	42.8674	48.4216		33.5	0.25806	4.24976	4.16431	6.19068	9.08375	11.7693	19.887	24.8674	33.925	42.9827	40.1384	52.5286	52.6384	80.4705		33.85	-1.78281
32.5	1.65028	4.27479	5.43445	6.47205	8.60828	11.9347	17.8551	21.8834	35.83	47.7318	70.8641	76.3268	93.3251	118.411		33.2	1.6382	2.76735	2.61476	3.86598	3.92702	6.30739	9.90846	16.012	19.3079	21.8103	28.0969	33.5596	42.5623	48.2691		33.55	-0.13266	4.46939	4.23746	6.31265	8.63199	11.757	19.13	24.8673	34.1447	43.7028	39.7599	52.6872	52.6505	79.213		33.9	-1.81327
32.55	0.67361	4.24416	5.0071	6.86868	8.27248	11.9041	18.1602	21.8833	36.2571	49.105	70.5589	77.1812	92.9588	119.112		33.25	1.66872	2.3401	2.46217	3.62184	3.86598	6.45998	10.061	16.2866	19.0637	21.7188	28.0359	33.7732	42.1655	47.7197		33.6	-0.31586	4.10308	4.35943	6.27593	7.78961	11.4151	18.8736	24.8428	34.3033	43.7271	39.6622	52.4063	52.8946	77.0767		33.95	-1.96581
32.6	1.25334	4.61027	4.51872	7.14323	8.08927	11.6904	18.3127	22.8598	36.5316	49.9594	70.3146	78.4628	92.684	118.807		33.3	1.79079	2.18752	2.18752	3.1946	4.01857	6.27687	9.87794	16.5003	18.667	21.5357	27.8833	33.9258	41.8299	47.262		33.65	-0.02299	3.93209	4.24947	6.5688	6.93502	11.2441	19.2275	24.7695	33.9126	43.9712	40.1992	51.9301	53.2729	75.5385		34	-1.99627
32.65	1.64996	4.97638	5.22052	6.99054	8.27227	11.7208	17.9463	23.7142	36.1043	50.356	70.4976	79.4393	92.3787	118.075		33.35	1.60768	1.88234	2.3401	2.88942	4.4153	6.42946	9.9695	16.5918	18.6365	21.4136	27.5171	33.8037	41.4636	46.9263		33.7	0.41636	3.50474	4.37144	6.44664	6.34898	11.1585	19.7523	24.7816	33.119	44.5814	41.1878	51.7713	53.5414	75.7215		34.05	-1.87415
32.7	1.77193	5.18989	5.00679	7.26509	8.57734	11.8732	17.6411	24.2634	35.3107	50.0202	70.0092	81.2397	92.9584	116.61		33.4	1.39406	2.18752	2.43166	2.58424	4.53737	6.55153	9.72536	16.5003	18.5449	21.3526	27.1509	33.9258	40.7923	46.9873		33.75	0.34302	2.83326	4.115	6.76392	6.10474	11.7566	20.4236	25.2209	32.7405	45.2039	41.9812	51.1487	52.8088	76.5637		34.1	-1.66047
32.75	1.77182	5.52548	4.76254	6.65463	9.15707	11.9952	16.817	24.0191	34.8224	49.1351	69.7955	82.3992	94.3316	114.9		33.45	1.24147	2.21803	2.6758	2.55373	4.65944	6.8567	9.87794	16.2866	18.3924	20.8948	26.6626	33.8342	40.304	47.1094		33.8	0.36734	2.65005	4.09048	6.94693	6.73941	12.0006	21.2292	25.3795	32.8625	45.6798	43.5558	51.112	52.3571	76.3439		34.15	-1.26369
32.8	1.34447	5.06761	4.48778	6.71556	10.0725	11.5068	16.3591	22.9814	34.395	48.4636	69.5512	82.6738	96.6814	113.954		33.5	1.18044	2.24855	2.79787	2.3401	4.35426	7.00929	9.72536	16.2256	18.2092	20.7117	26.6016	34.1089	39.3579	47.384		33.85	0.01324	3.01617	4.41998	6.67828	6.99566	12.1592	21.0704	25.0987	33.3018	45.9727	44.3004	50.1719	51.7466	76.0508		34.2	-1.05001
32.85	2.19886	5.06751	4.57923	6.53235	9.88928	11.5983	16.7557	22.1879	33.9371	47.5175	68.7577	82.5821	99.1227	112.672		33.55	1.21095	1.97389	3.10304	2.70631	4.29323	7.03981	9.84743	16.5308	17.9346	20.3455	26.4795	33.8648	38.6255	47.6587		33.9	-0.30424	3.15035	4.13912	6.04341	6.99556	12.7451	20.4111	25.5014	33.5947	46.1557	44.7763	49.1709	51.9297	75.1596		34.25	-0.65323
32.9	1.95461	4.30446	5.03689	6.89846	10.0418	11.4456	16.8472	21.9741	34.0286	46.5103	67.9946	81.9412	100.404	110.811		33.6	1.27199	1.76027	3.04201	2.88942	4.17116	7.16188	9.78639	16.8054	17.7515	20.437	26.7847	34.0479	37.71	47.7808		33.95	-0.57289	3.13804	3.74839	5.99449	6.87339	13.807	20.3133	25.9896	33.204	46.8758	44.41	48.5848	51.8929	74.9154		34.3	-0.80576
32.95	2.65641	3.90763	4.97574	7.23405	9.79752	11.6286	16.6335	22.4623	34.4557	46.0829	66.8349	81.5749	102.388	108.583		33.65	1.45509	1.69923	3.01149	3.34718	4.26271	6.79567	9.81691	16.897	17.3547	20.3455	26.9678	33.8648	37.2217	48.147		34	-0.51196	3.17457	3.61402	6.15308	6.95875	13.5261	20.0325	26.2703	33.1062	47.1687	44.0803	49.2683	51.8806	73.3406		34.35	-0.71416
33	2.13751	3.54131	6.19634	7.5086	9.46172	12.3609	15.8399	22.7674	34.9134	45.8387	65.431	81.6053	102.968	106.08		33.7	1.30251	1.66872	2.58424	3.3777	3.98805	6.61256	9.90846	16.836	17.2632	20.437	26.8152	33.6206	37.1301	48.4522		34.05	-0.35336	3.35757	3.66275	6.06754	7.12955	13.4162	19.9469	26.7218	31.9464	47.4128	45.0446	51.2336	51.1603	72.2785		34.4	-0.95824
33.05	2.19844	3.6938	6.28779	7.29487	9.27851	12.666	15.2905	23.164	35.6762	45.1977	65.3088	81.5747	101.96	104.554		33.75	1.33302	1.57716	2.46217	3.59132	4.0796	6.18532	9.90846	16.6529	17.0801	20.4675	26.4795	33.2239	37.2217	48.9099		34.1	-0.0727	3.43072	4.55377	6.28716	7.64215	13.0987	20.1788	26.795	31.2139	47.1929	46.2774	53.565	50.501	70.5328		34.45	-0.86664
33.1	2.10678	4.3956	7.29477	6.56234	8.69857	12.5743	14.6495	23.286	35.8897	44.6178	65.4308	81.8492	100.648	103.883		33.8	1.24147	1.21095	2.18752	3.31667	4.04909	6.33791	10.1221	16.3477	16.9885	20.5896	25.8997	32.7661	37.5879	48.8794		34.15	0.56197	3.45504	5.10298	5.62789	7.93502	12.4638	19.9589	26.624	30.4326	47.1074	48.1328	56.3115	49.9882	69.5439		34.5	-1.08021
33.15	2.07615	4.70067	6.22655	5.9824	8.33226	12.6657	14.7715	23.4385	35.8286	44.6176	66.3767	83.0393	98.9695	103.395		33.85	1.36354	1.02785	2.12648	3.07252	4.47633	6.18532	9.72536	16.2256	16.6834	20.7422	25.5945	32.7661	37.2522	48.3606		34.2	0.41539	3.25963	5.15172	5.77427	7.59312	12.0243	19.8856	26.7215	30.0174	46.8509	48.7796	57.6786	50.2445	68.1278		34.55	-1.20222
33.2	1.95398	5.31091	6.04333	5.73816	8.30164	13.1234	15.5343	23.3163	35.5844	44.3124	67.4752	84.0463	97.8707	105.012		33.9	1.24147	0.96681	1.97389	2.79787	4.65944	6.18532	9.69484	16.012	16.4392	20.6812	25.0147	32.522	37.0996	47.6282		34.25	-0.01196	3.5525	5.04175	6.20142	7.70289	11.4138	20.3005	25.9646	29.7732	46.448	48.804	58.0325	50.5618	67.1511		34.6	-1.41579
33.25	1.31301	5.00563	5.61598	5.52443	8.20998	12.6655	15.8394	23.8655	35.4622	44.709	67.3836	85.5415	97.1992	106.904		33.95	1.33302	1.33302	1.94337	2.73683	4.5984	5.91066	9.38966	15.5542	16.3782	20.7727	24.6179	32.4915	37.2522	46.8347		34.3	-0.46371	3.83316	4.29703	6.1647	7.38541	11.4748	19.9831	26.0744	29.7853	45.63	47.0338	56.7751	51.05	65.2101		34.65	-1.41574
33.3	1.22135	5.3107	5.3107	6.19571	8.63712	13.4284	15.6867	24.3842	34.9128	45.0751	67.0172	86.8231	96.6498	109.62		34	1.33302	1.54665	2.24855	2.91994	4.32375	5.54445	9.23707	15.2796	16.2256	20.4065	24.0991	32.1253	38.3814	46.5601		34.35	-0.81782	3.61334	4.26031	6.17681	7.59283	12.0118	20.1172	25.6226	30.542	45.2149	45.4102	55.0049	50.7447	64.0626		34.7	-1.11051
33.35	0.88555	5.3106	5.40215	5.98198	8.88115	14.2217	15.534	24.7198	35.1873	45.1666	65.9185	87.6775	97.2601	111.634		34.05	1.69923	1.85182	2.49269	2.79787	4.14064	5.4529	8.71828	15.3406	16.2866	20.5591	24.1297	31.7896	39.9072	46.3464		34.4	-0.78129	3.73531	4.16256	6.14009	7.73922	12.5854	19.8242	25.7202	30.2734	45.0927	43.3471	53.1127	50.5859	62.3413		34.75	-0.92735
33.4	1.37372	5.64619	4.57807	6.28705	9.00312	14.5878	15.3203	24.8112	36.4689	45.0444	65.6437	88.6235	99.6708	112.61		34.1	2.06544	1.85182	2.91994	2.79787	4.32375	5.36134	8.65724	15.249	16.3172	20.6201	24.4348	31.5759	41.0974	46.5906		34.45	-0.85463	3.30797	4.26011	6.20103	7.7025	12.4755	19.8485	25.1341	30.6273	45.1903	41.8089	51.8309	50.1952	60.8153		34.8	-0.62212
33.45	1.61776	5.61556	5.1578	5.64608	8.78939	14.0079	14.5267	24.8111	36.8961	45.2274	66.193	89.2032	101.441	112.915		34.15	2.3401	1.85182	2.8589	2.37062	4.29323	5.636	9.08449	15.188	16.5003	20.5896	24.5874	31.3318	41.7993	46.8347		34.5	-0.13451	3.61304	4.15015	6.24976	7.62916	11.5476	19.6287	25.2317	30.7249	44.7996	42.0164	51.721	50.8054	59.5701		34.85	-0.56103
33.5	2.44163	5.8596	5.12718	6.46995	8.8198	12.5735	15.0454	24.8415	37.6284	45.7461	66.1318	89.9965	101.837	112.488		34.2	2.43166	1.76027	2.88942	2.18752	4.47633	5.4529	9.08449	14.9133	16.5003	20.376	24.8316	31.3318	41.5857	46.8347		34.55	0.35367	3.68619	4.3942	5.74918	6.76236	11.5719	19.8483	24.9142	32.0187	44.5431	43.1515	51.4645	50.6466	59.0329		34.9	-0.2558
33.55	2.0448	5.46276	6.0426	6.65295	8.14831	11.9935	15.4115	24.0785	38.2692	46.1427	66.1927	90.5152	101.013	112.152		34.25	2.21803	1.60768	2.49269	1.85182	4.29323	5.57497	9.05397	14.6997	16.2256	19.9182	24.801	31.2097	41.4636	46.7432		34.6	0.70758	4.08892	4.40631	5.52935	6.71344	11.4986	19.5552	24.7188	32.6168	43.1514	44.9337	51.6719	50.7442	59.4112		34.95	-0.40834
33.6	2.2278	5.188	5.55421	6.9275	8.36183	11.1694	15.4114	23.5291	38.6353	47.3633	65.979	90.0574	98.9685	113.068		34.3	2.06544	1.69923	2.40114	2.157	4.35426	5.39186	8.59621	14.1809	15.9509	19.8267	25.0147	31.5149	41.2195	46.3159		34.65	0.60982	4.08883	4.72359	5.21187	6.62789	12.4506	20.0434	23.9375	32.9218	42.4311	46.081	51.269	50.268	58.8496		35	-0.59139
33.65	2.01407	5.09634	5.52359	7.14102	8.39224	11.1083	15.4723	23.4984	37.8112	47.882	66.2536	88.623	97.9613	114.96		34.35	1.76027	1.85182	2.40114	2.46217	4.11012	5.48341	8.87086	13.9673	15.4321	19.3994	25.1367	31.7896	41.1585	46.3159		34.7	0.51207	4.33287	4.47935	5.40709	7.62877	12.4627	19.6527	24.1693	31.8964	41.4789	47.5824	51.6351	50.2801	58.9838		35.05	-0.80496
33.7	2.31914	5.18779	5.95073	6.56108	8.6668	10.9861	15.0755	23.5594	36.6819	48.4922	67.8404	88.4092	97.2898	116.516		34.4	1.60768	2.40114	2.64528	2.61476	3.83546	5.51393	9.14552	13.5095	15.3101	19.4299	25.5335	32.2778	40.8838	46.5601		34.75	0.02369	3.71021	4.7234	5.46802	7.53101	12.9265	19.3962	23.9006	30.9685	41.3689	47.7532	51.4275	50.7927	57.7507		35.1	-0.89646
33.75	2.258	5.24872	6.16425	6.62201	8.75824	11.3522	14.0683	23.4982	35.0339	49.2551	69.4272	88.287	96.954	118.438		34.45	1.30251	2.64528	2.82838	2.8589	3.59132	5.75807	9.60329	13.5095	15.3101	19.2468	25.8997	32.8272	40.1819	47.0789		34.8	0.15787	3.45377	3.89322	5.59	7.76285	12.8166	18.4684	24.279	30.2848	40.1847	48.8395	52.3307	51.8302	57.0304		35.15	-0.74382
33.8	2.01375	4.60775	6.74398	5.95052	9.06331	11.5657	13.5799	23.4371	33.0806	50.201	69.8238	88.0733	96.9844	119.354		34.5	1.14992	2.91994	2.70631	2.76735	3.3777	6.27687	9.69484	13.1738	15.7373	19.2468	26.0523	33.1934	39.48	47.4451		34.85	0.68267	3.07525	3.69781	5.45562	7.25006	12.8897	17.8824	24.5718	29.6378	39.2081	48.8516	52.6358	53.7344	56.7862		35.2	-0.43859
33.85	1.89158	4.14988	6.19456	6.37766	9.70408	11.9929	13.1831	23.4065	31.8598	50.9944	70.4035	88.4699	97.2895	119.415		34.55	1.08888	2.79787	2.64528	2.6758	3.74391	6.24635	9.48122	13.0823	16.2866	19.3384	26.2964	33.4375	38.3814	47.4756		34.9	1.40279	3.39254	3.52681	5.62642	7.1401	12.914	17.5039	24.8647	29.8818	38.1948	48.8515	52.4648	54.7475	58.6782		35.25	0.1413
33.9	2.07458	4.27184	6.31652	6.56066	9.49035	11.8097	13.305	22.9791	31.1273	52.3675	70.7391	88.1036	98.1134	120.056		34.6	0.99733	2.70631	2.157	2.12648	3.92702	6.24635	9.42018	12.8076	16.5613	19.3384	26.1133	33.1628	37.71	47.7808		34.95	1.08531	3.17271	4.11265	5.44322	7.33531	12.9994	18.0043	25.0477	29.8695	37.4623	48.2167	52.0741	55.6996	60.2162		35.3	0.17187
33.95	1.49464	4.69898	5.7671	7.01832	9.94801	11.9927	13.8237	23.3147	31.1272	53.1304	72.3564	87.0964	99.2729	120.452		34.65	1.18044	2.55373	2.03493	1.88234	4.38478	5.72755	9.08449	12.9602	16.6529	19.5215	25.8081	32.7356	37.1301	47.7808		35	1.01197	3.5022	4.27125	5.11353	7.64039	13.0847	18.6145	24.8523	30.5774	36.6443	47.9602	52.0618	55.7117	61.571		35.35	0.01934
34	1.03677	4.45474	6.34683	7.65908	8.84927	11.5043	13.9457	23.4672	31.5238	52.3673	74.8588	86.2724	100.219	120.391		34.7	1.18044	2.12648	1.72975	1.54665	4.32375	5.66652	8.90138	13.1433	16.3477	19.3079	25.6861	32.4915	36.7029	48.1165		35.05	0.37711	3.18472	3.81949	5.35758	7.89664	12.5475	18.3947	24.5226	30.028	35.4479	48.4728	52.0495	56.1999	61.4123		35.4	-0.56044
34.05	0.73149	4.36308	6.04155	7.81157	8.36088	11.3516	14.5559	23.3145	32.3782	51.7264	76.7202	85.6314	100.921	119.384		34.75	1.33302	1.94337	1.76027	1.51613	4.29323	5.75807	8.53517	13.479	16.1951	19.2468	25.8081	32.1253	36.6419	48.3606		35.1	0.58453	3.18463	4.36871	5.30865	7.16412	12.8648	18.0528	23.4239	29.8814	35.4112	48.6924	52.0982	56.1754	60.4966		35.45	-0.98764
34.1	1.06708	4.17987	6.62128	7.81146	7.99457	11.1989	14.3727	23.2534	32.6528	51.3295	77.6662	85.2345	101.043	117.675		34.8	1.18044	1.66872	1.88234	1.69923	4.35426	5.88014	8.56569	13.6316	16.134	18.9417	26.2354	31.7285	36.4282	48.4522		35.15	0.32808	3.31881	3.74605	5.99215	6.79781	12.4985	17.5644	23.3872	29.6616	35.7163	49.144	52.5131	56.8955	58.8364		35.5	-1.10965
34.15	1.9825	4.36287	6.37703	7.29256	8.11653	11.8092	14.4642	22.9176	32.9884	51.1768	77.6966	85.5701	99.3946	115.233		34.85	0.93629	1.69923	1.88234	1.76027	4.35426	5.94118	8.71828	13.418	16.2561	18.728	26.2354	31.1182	36.7029	48.6048		35.2	0.14488	3.02574	3.86803	5.99205	6.29722	12.1566	17.6986	23.2528	30.1376	36.6317	48.8265	52.4398	56.7367	58.1527		35.55	-1.14012
34.2	3.35569	4.05759	6.92624	7.26194	8.54367	11.9922	13.9758	23.1311	33.7817	50.6274	77.8186	85.8447	98.2653	113.341		34.9	0.72267	1.54665	1.91286	2.09596	4.35426	5.75807	8.59621	13.2044	16.3172	18.8196	25.9912	30.6604	37.0386	48.4216		35.25	0.54762	3.05006	3.92896	6.51685	6.85865	11.5706	17.5886	23.5945	29.8811	36.4851	48.094	53.0867	57.5667	57.7498		35.6	-0.77385
34.25	3.96593	3.72179	6.40734	6.22423	8.66564	12.2972	14.1283	22.9479	34.7887	49.9254	78.6119	85.8446	98.0821	111.205		34.95	0.87526	1.57716	1.72975	2.157	3.98805	5.88014	8.84035	12.8076	15.7983	18.606	25.7471	30.5689	37.3743	48.6353		35.3	0.65738	2.73258	4.24625	6.46793	6.79752	11.7292	18.6383	23.1427	29.3927	36.9001	46.8732	53.819	58.3234	57.3468		35.65	-0.7738
34.3	3.35548	3.69117	6.10206	6.89551	9.42847	11.7783	14.3723	22.7341	35.0022	48.3994	79.6494	86.2412	99.8521	109.19		35	1.30251	1.66872	1.94337	2.37062	3.83546	5.88014	8.84035	12.8687	15.5847	18.667	25.4724	30.4163	37.5574	48.4827		35.35	1.07232	2.89117	4.6856	6.419	6.78521	12.2051	19.2486	22.9717	29.2339	36.5582	46.2872	54.6612	59.5074	56.3091		35.7	-0.46857
34.35	2.92812	4.02676	5.21694	6.65127	8.87905	11.5646	14.83	22.5509	34.6664	46.9955	80.7479	86.3021	102.141	108.305		35.05	1.45509	1.51613	1.91286	2.30959	3.53029	6.12428	9.17604	12.8382	15.2185	18.606	25.4724	30.5994	37.3743	47.9028		35.4	0.36422	2.52486	4.34371	6.16256	6.67525	11.9121	19.7124	22.6665	29.5756	37.144	45.4204	54.7832	59.1899	56.1626		35.75	-0.31593
34.4	1.92094	4.4539	5.30839	7.7498	9.4893	11.6866	15.2571	21.6963	34.117	46.3545	82.0296	86.5767	104.307	107.634		35.1	1.79079	1.27199	1.97389	2.40114	3.59132	6.42946	9.4507	13.0213	15.127	18.5755	25.1367	30.5078	37.3132	47.4146		35.45	0.63267	2.96422	4.46568	5.80846	6.38219	12.1073	18.9798	23.1913	30.1126	37.0951	44.6756	55.0394	58.3841	56.0648		35.8	-0.34639
34.45	2.19549	4.33172	4.94207	7.32244	9.27557	11.4118	15.2875	21.0554	32.9877	45.8661	82.7314	85.9968	106.566	107.603		35.15	1.79079	0.6006	2.03493	2.76735	3.71339	6.61256	9.6338	13.1128	15.1575	18.728	25.0147	30.5383	36.9776	46.8958		35.5	0.76685	3.0984	4.68531	6.10133	6.87037	11.6555	18.5525	23.5574	30.0393	37.5833	44.2239	55.5886	56.6873	57.0901		35.85	-0.43789
34.5	1.70711	4.72835	5.36921	7.56648	9.30598	11.3507	15.2874	20.567	32.8961	45.5303	82.4566	85.3253	108.976	107.298		35.2	1.72975	0.29543	1.97389	2.98097	3.86598	6.79567	9.6338	13.2959	15.0354	18.728	24.9231	30.752	36.3977	46.6516		35.55	1.04752	3.34244	4.64859	5.55191	6.80924	11.9606	18.1618	24.0578	30.027	36.9606	44.6632	56.6872	55.7961	57.7126		35.9	-0.83457
34.55	2.80563	4.11789	5.24704	6.65085	8.66501	10.9233	15.0737	21.3908	32.3466	44.7978	82.7006	83.4941	111.326	106.504		35.25	1.54665	0.35646	2.12648	3.10304	4.23219	6.39894	9.38966	13.2654	15.188	18.9417	24.6485	30.6909	35.8179	46.3464		35.6	1.30377	4.28228	4.91705	5.67389	7.38287	11.6187	18.1129	23.6915	29.7828	37.0337	45.1148	57.3829	55.8448	58.9332		35.95	-0.83451
34.6	2.98863	4.27037	5.94884	6.98644	8.63439	11.5641	15.9586	21.6654	32.194	44.5841	82.67	82.1817	112.913	105.924		35.3	1.14992	0.6006	2.09596	2.55373	4.35426	5.94118	9.26759	12.9602	15.127	19.0027	24.7705	30.8435	35.0855	46.0413		35.65	1.20601	4.33101	4.50191	5.41744	7.34615	12.0581	17.8076	23.7768	29.9169	36.6064	45.6274	58.1884	56.8823	59.4336		36	-0.8955
34.65	3.38526	3.93457	6.19287	6.62012	8.35962	11.3503	15.8669	22.7944	32.2854	44.3398	82.2121	82.4868	113.798	107.755		35.35	1.14992	0.99733	2.21803	2.21803	4.47633	5.48341	9.20656	12.7161	15.3101	19.0637	24.74	30.9351	34.6582	45.7666		35.7	1.92613	4.63609	4.51402	5.93004	7.4193	11.8993	17.2215	23.8011	29.868	37.534	46.4208	58.8841	58.2372	60.288		36.05	-0.62078
34.7	2.74428	4.36171	6.95571	7.74917	7.99331	11.2282	16.3246	23.0995	31.6749	44.5534	82.151	83.4022	114.164	110.441		35.4	1.08888	1.02785	2.12648	1.88234	4.35426	5.30031	9.08449	12.4414	15.7373	18.9722	24.8621	30.9656	34.4446	45.4309		35.75	1.65748	3.79371	4.44068	6.01539	6.74781	12.0823	17.1726	24.5579	29.9046	38.1931	47.0798	59.4334	59.3967	60.9226		36.1	-0.25452
34.75	2.2559	3.96488	6.31473	7.68802	7.96268	10.7398	16.2024	24.198	32.1936	45.4383	81.7847	84.1956	114.042	112.058		35.45	1.24147	1.14992	1.97389	1.57716	4.17116	5.42238	9.20656	12.594	15.8594	18.5755	25.0452	31.1487	33.9258	45.2783		35.8	1.59635	3.87906	4.18424	6.14957	6.67447	11.9723	17.6608	24.8752	29.758	39.0964	47.9953	59.9338	59.3356	61.4963		36.15	-0.13239
34.8	2.16424	4.1784	6.07049	7.87103	8.38982	10.6176	16.1413	24.0759	32.3156	45.8654	81.4794	85.0195	112.882	113.096		35.5	1.08888	0.90578	2.03493	1.60768	4.35426	5.51393	9.08449	12.6856	16.012	18.3618	24.8926	30.874	33.7122	45.553		35.85	0.82721	3.50055	4.89215	5.61236	6.08844	12.2774	18.2588	25.4244	29.6236	39.7676	47.9586	59.8482	57.5655	61.4473		36.2	-0.04079
34.85	2.68293	4.30036	5.30744	7.44367	8.96955	10.3734	15.775	25.0828	33.5972	45.8653	81.1741	85.9044	110.746	114.133		35.55	0.72267	0.75319	1.91286	1.54665	4.38478	5.57497	9.02345	12.8382	15.7983	18.1787	24.8621	30.7825	33.5596	45.8276		35.9	1.37642	3.74459	4.84322	5.60006	6.49117	12.021	18.3198	25.4609	29.2451	40.6831	47.8974	59.5429	55.2827	61.374		36.25	-0.43746
34.9	3.47628	4.94113	4.81906	7.10788	8.81686	10.7089	15.6223	24.4724	33.5056	46.0788	81.1435	86.2094	109.128	115.567		35.6	0.63112	0.87526	1.91286	1.85182	4.50685	5.60548	8.87086	12.7771	15.7373	17.6904	24.679	30.7215	33.7122	46.3159		35.95	1.09557	3.36607	5.08727	5.58775	6.58873	12.1673	18.2098	25.2411	28.5858	41.0126	46.9452	58.3221	53.3783	62.68		36.3	-0.59
34.95	3.04893	5.06309	4.81895	6.00914	8.87779	11.3497	15.5306	24.6859	33.9632	46.3229	80.35	86.5755	108.396	117.581		35.65	0.44801	0.96681	1.88234	2.03493	4.50685	5.54445	8.59621	12.594	15.5542	17.5684	24.4043	30.5383	34.2004	46.6516		36	1.07105	3.65894	4.4524	5.59986	6.75953	12.0696	17.929	24.5574	28.4026	40.6096	46.2493	58.1633	52.8777	64.511		36.35	-0.52891
35	2.8352	4.57471	5.00195	5.24609	8.3894	11.5938	14.7371	23.9534	33.6885	47.0247	80.1973	86.7585	108.212	120.053		35.7	0.66164	1.30251	2.03493	2.03493	4.26271	5.4529	8.53517	12.4719	15.0659	17.2327	24.0076	30.6909	34.5972	46.8042		36.05	0.58268	3.64664	4.48892	5.58756	6.7106	12.2282	17.3673	24.1056	28.964	40.1945	45.2604	57.8092	53.0851	66.9157		36.4	-0.52886
35.05	1.85854	4.11684	5.45961	4.54408	7.71791	11.6852	15.0726	23.7091	34.2987	47.6349	79.5563	87.1857	107.877	122.006		35.75	0.72267	1.1194	2.37062	2.06544	4.35426	5.1172	8.29103	12.1057	14.8523	17.1716	23.6108	30.9046	35.4517	46.9568		36.1	0.60699	3.79303	4.59869	5.91705	7.25982	11.8131	17.0377	23.4097	30.2823	39.23	45.6754	57.3697	53.8297	67.9044		36.45	-0.25414
35.1	1.82791	3.84207	5.18485	5.21537	7.26004	11.502	15.0115	23.4344	34.146	47.4212	78.7322	87.6433	108.609	123.288		35.8	0.6006	1.02785	2.43166	1.79079	4.32375	4.99513	8.22999	11.8616	14.7608	17.3547	23.7634	31.2097	36.3062	46.6211		36.15	0.05758	3.62203	5.17232	6.27096	7.00338	12.2768	16.2197	23.5195	30.6972	38.9248	45.8584	55.8193	54.0981	68.539		36.5	-0.16254
35.15	0.82073	4.2387	5.88665	5.55095	7.38201	11.1357	15.5912	23.2817	34.3595	47.7873	78.0912	88.8029	109.097	123.807		35.85	0.6006	0.84474	2.43166	1.8213	4.35426	4.87306	8.35207	11.5259	14.7608	17.3242	24.1297	31.9422	36.9776	46.5906		36.2	0.38707	3.81725	5.09898	6.72252	7.3817	12.4842	16.5004	23.6903	30.807	38.119	46.9325	54.2445	54.7938	68.0262		36.55	-0.04041
35.2	1.06476	4.26911	5.4593	7.01569	7.99226	10.7388	14.8892	23.6478	33.9322	47.1463	76.5653	90.7559	109.066	122.83		35.9	0.50905	0.53957	2.18752	1.88234	4.14064	4.5984	8.29103	11.0071	14.8828	17.5073	24.0686	32.522	37.4048	46.6821		36.25	0.48463	3.89039	4.7815	7.22291	6.90553	12.7283	16.659	24.2639	29.8669	38.4607	48.2629	53.28	55.5383	67.2083		36.6	-0.22347
35.25	1.15621	4.54366	5.6423	7.22921	7.99215	10.6167	14.7976	23.312	34.4814	47.2072	76.26	92.5869	108.822	121.457		35.95	0.6006	0.63112	1.8213	2.12648	3.74391	4.68996	8.4131	10.9461	14.5166	17.5989	24.1297	33.1934	37.2217	46.5296		36.3	1.16812	4.51285	4.64713	7.49137	6.92984	12.2887	17.0739	23.7877	29.4884	38.131	49.7643	53.0114	56.6613	66.1095		36.65	-0.62014
35.3	1.88853	4.20787	5.09288	7.046	8.17515	10.5555	13.7904	23.556	34.4813	46.9019	75.8326	94.2042	108.517	120.632		36	0.4175	0.44801	1.85182	2.27907	3.74391	4.75099	8.22999	10.9155	14.1199	17.782	24.0991	33.9868	37.0386	46.377		36.35	1.35113	4.2442	4.61041	6.88092	6.25836	12.606	17.0006	23.3848	28.6705	38.2286	50.3868	53.8536	57.7598	65.316		36.7	-0.62009
35.35	2.37671	4.32983	5.12329	6.06933	7.47314	10.6165	14.6143	22.9456	34.9695	47.5122	75.4968	95.1196	108.303	120.052		36.05	0.29543	0.50905	1.8213	2.00441	3.56081	5.05617	8.16896	10.8545	14.1504	18.2092	23.9465	34.353	37.1301	46.377		36.4	1.35104	4.23189	4.59811	6.3315	6.4902	12.1298	17.1958	22.7255	28.8046	37.9477	49.3613	55.1718	57.5522	65.914		36.75	-0.58952
35.4	2.22401	3.933	4.29921	6.00819	7.53407	10.3112	15.1329	23.5253	34.9083	46.8712	75.2526	95.2416	108.822	119.778		36.1	0.29543	0.69215	2.27907	1.66872	3.68288	5.4529	8.19948	10.8545	14.1809	18.2092	23.9465	34.5972	37.4963	46.499		36.45	0.61852	3.26744	4.02428	5.56236	6.41686	11.91	16.8417	23.1161	29.2074	37.911	48.9339	57.1859	56.9173	66.1947		36.8	-0.61998
35.45	1.94925	4.23807	4.54324	5.61136	7.0762	9.6702	16.1094	23.3421	34.9082	46.4134	75.222	95.211	109.463	120.418		36.15	0.02077	0.57008	2.52321	1.60768	3.86598	5.69704	7.83327	10.7935	14.4861	18.0261	23.7329	34.5056	38.0762	47.0483		36.5	0.77711	3.58473	3.81666	5.67213	6.79518	11.1531	16.7805	23.7141	29.1096	38.2405	48.7019	58.1013	56.2947	66.634		36.85	-0.37579
35.5	1.64397	4.23796	4.45159	5.82488	8.11369	8.84612	15.6821	23.7997	34.3283	44.8263	76.29	94.3564	109.432	121.395		36.2	-0.16234	0.57008	2.52321	1.54665	3.95753	6.1548	7.55861	10.6409	14.3335	17.5379	23.6108	34.0174	38.7476	47.5366		36.55	0.5817	3.49918	3.69449	5.35465	6.75846	10.8966	16.6339	24.2145	28.963	37.984	49.3488	59.2487	56.5876	66.1823		36.9	-0.37573
35.55	2.28473	4.26837	4.75666	6.28254	8.02204	8.44928	15.7735	23.1282	34.2672	44.7957	76.2593	91.5181	110.042	123.073		36.25	-0.34544	0.69215	2.79787	1.60768	4.17116	6.24635	7.16188	10.7935	14.1199	16.9275	23.4888	33.5596	38.9307	47.9944		36.6	0.80133	4.06061	4.43902	5.70855	7.12457	10.5548	16.5972	24.5928	28.4747	38.3379	49.0924	60.6646	57.0147	65.6085		36.95	-0.13154
35.6	2.31514	4.51241	5.27535	6.61812	8.35762	8.63228	14.8884	23.2502	34.2976	44.0022	76.0151	88.1	110.653	124.477		36.3	-0.40648	0.84474	2.95045	1.39406	3.95753	6.1548	6.70412	11.0376	14.1809	16.5918	23.1836	33.2239	39.2358	48.6658		36.65	0.37398	3.64547	4.51217	5.18355	7.45406	10.8842	16.7558	23.9946	28.4868	38.0571	48.3476	61.3847	57.9668	65.0957		37	-0.10097
35.65	2.95591	4.45127	5.42783	7.38096	7.83872	7.99131	15.0714	22.5482	34.2364	43.5138	75.191	85.2923	110.927	124.294		36.35	-0.22337	0.96681	3.04201	1.24147	3.68288	5.88014	6.6736	11.1597	14.0283	16.5003	23.0005	32.7661	39.5715	48.8489		36.7	0.10533	3.97496	4.48766	5.51305	7.79576	11.2626	16.4628	23.5428	28.2181	37.8861	46.4066	60.9696	59.0653	64.2655		37.05	-0.43661
35.7	2.46752	4.60375	5.76342	6.95361	7.93017	8.11327	14.4304	22.7617	34.0532	42.8728	75.9844	83.0034	111.202	123.103		36.4	-0.13182	0.75319	2.88942	1.39406	3.3777	5.51393	6.82619	11.4343	13.9063	16.1646	22.7564	32.3084	39.6631	48.5742		36.75	-0.22435	3.76734	4.31666	5.09791	7.6858	11.6775	16.719	22.3587	28.5232	36.7629	44.2092	60.115	60.2004	63.9602		37.1	-0.61966
35.75	1.735	4.20692	5.61073	6.89247	7.68592	8.05213	14.7965	21.9987	33.6869	43.2084	76.4725	82.3014	111.781	122.432		36.45	0.14284	0.6006	2.61476	1.24147	2.91994	5.54445	7.03981	11.5259	13.7842	16.2256	22.2681	32.0337	39.5715	48.2691		36.8	0.44693	4.19449	4.84147	5.4152	7.22184	12.0314	16.6335	21.9435	27.8395	36.1647	42.8786	60.4323	61.7995	63.3254		37.15	-1.01633
35.8	1.15506	4.08474	5.51907	5.79373	7.92996	9.27273	14.5218	22.1206	33.6868	43.3914	76.7776	81.1416	112.453	123.256		36.5	0.69215	0.6006	2.52321	1.21095	2.6758	5.54445	7.61964	11.3733	13.7232	16.3477	21.9324	31.7896	39.2358	47.9334		36.85	0.43463	4.3775	4.84137	5.47613	7.38043	12.0069	16.9507	21.5406	27.4122	35.6519	41.7554	60.9083	63.484	63.252		37.2	-1.19939
35.85	0.33098	3.59636	4.90861	5.97673	7.62468	9.15056	15.071	21.3271	32.6491	43.5133	76.3503	80.7448	112.788	125.423		36.55	0.90578	0.4175	2.43166	1.27199	2.61476	5.51393	7.95534	11.0071	14.1504	16.7139	21.6577	31.4233	38.8391	48.0249		36.9	0.73971	4.48727	4.91451	5.89107	7.07516	12.3974	16.8042	21.8579	26.6919	35.8593	41.6088	62.1777	65.1928	62.2265		37.25	-0.89416
35.9	0.60553	3.87091	4.87799	5.70196	7.56354	9.91339	14.8267	21.6321	32.2522	44.1236	75.7398	81.1414	112.88	127.772		36.6	0.96681	0.47853	2.18752	1.30251	2.58424	5.54445	8.10792	10.7324	14.5471	17.3242	21.4746	30.7825	38.656	48.147		36.95	0.49547	3.96227	4.3651	5.4149	7.4901	11.8114	16.8529	22.0043	26.0448	36.1766	40.974	63.5448	66.5111	61.3353		37.3	-0.49737
35.95	0.78853	4.14546	4.26753	6.40376	7.53291	9.91329	15.2233	21.632	31.6723	44.154	75.8618	82.1179	112.544	129.542		36.65	0.93629	0.44801	2.09596	1.6382	2.64528	5.60548	7.8943	10.3967	14.364	17.5073	21.8713	30.5078	38.4424	48.1165		37	1.19117	3.77906	4.30397	5.0608	7.61207	11.7747	16.3035	21.9309	25.8006	35.4197	40.9739	63.9353	67.3655	61.3963		37.35	-0.10059
36	1.88706	4.23691	4.32846	6.58676	8.02109	10.6761	14.9181	22.6695	32.2826	44.0929	75.2818	83.3385	111.659	129.634		36.7	0.6006	0.50905	1.94337	1.76027	2.6758	5.69704	7.31447	10.3357	14.2725	17.721	22.5427	30.5689	38.1067	47.9028		37.05	1.25211	3.85221	3.97428	4.91422	8.19791	11.1886	15.7296	22.0529	25.2511	35.4196	41.694	63.8254	67.9513	61.3351		37.4	0.08257
36.05	2.4973	4.02318	4.20629	7.22753	8.87548	10.7676	15.5893	22.6694	32.5266	42.2617	75.7395	83.9182	111.14	128.504		36.75	0.50905	0.81422	1.88234	1.97389	2.88942	6.09376	7.25343	10.2136	14.3335	17.9041	23.0921	30.7215	38.1067	47.5671		37.1	1.37408	3.64459	4.38922	4.98736	8.23444	11.1885	15.815	21.6011	25.2999	35.3096	42.9268	63.1539	67.524	61.8721		37.45	-0.03945
36.1	2.80237	3.35169	4.0536	7.34949	8.90589	11.1337	15.7723	22.7304	33.7472	41.8954	75.4952	85.1083	110.285	127.009		36.8	0.50905	0.99733	2.06544	2.157	3.46925	6.03273	7.40602	9.9695	14.1809	18.0872	23.4888	31.2097	38.0457	47.0483		37.15	0.75143	3.87643	4.58443	5.28024	8.42965	10.8711	15.8149	21.7353	24.9458	36.1274	44.2695	62.6411	67.2919	62.3481		37.5	-0.25302
36.15	3.07693	3.53469	4.02297	7.37991	8.78371	10.8589	16.4741	21.7537	34.1743	41.4375	74.6712	85.5049	110.682	127.131		36.85	0.72267	1.39406	1.85182	2.157	3.59132	5.88014	7.52809	10.2747	14.2114	18.4229	23.2446	31.5149	37.771	46.8042		37.2	0.21422	3.44908	5.23131	4.90172	8.18541	11.3959	16.2665	21.2225	24.9945	36.8597	44.7455	61.7621	66.5716	62.7264		37.55	-0.43607
36.2	2.52751	3.68717	4.23649	7.53239	8.50895	10.3095	16.7487	20.838	35.4865	42.3529	73.5419	85.2606	111.536	127.07		36.9	1.05836	1.6382	1.76027	2.21803	3.62184	5.66652	7.68068	10.5799	13.9673	18.8501	22.8479	31.6065	37.8015	46.9263		37.25	0.25074	3.55885	4.97486	5.24342	7.96559	12.0061	15.9124	20.9172	25.4216	37.2869	45.4534	61.1638	66.4617	62.8118		37.6	-0.80223
36.25	2.3443	3.83966	4.93829	7.16607	8.38678	9.76007	16.9927	20.1055	35.7916	41.8646	71.8939	83.9178	112.513	126.795		36.95	1.1194	1.69923	1.60768	2.24855	3.59132	5.33083	7.74171	10.4883	13.7537	18.8196	22.5733	31.6065	37.8015	46.8347		37.3	0.73893	3.40006	4.8649	4.87711	8.08756	12.1037	16.1442	20.2824	25.922	37.4943	45.9171	60.9074	66.901	62.2502		37.65	-0.58855
36.3	1.52022	3.90059	4.93818	7.16597	7.62373	8.99702	16.6264	20.1359	36.7375	41.6508	71.1003	83.1852	112.757	126.673		37	1.1194	1.8213	1.39406	2.00441	3.3777	5.33083	7.7112	10.2747	13.7232	18.8806	22.2681	31.8201	37.7405	47.0483		37.35	1.43463	4.10797	4.80377	5.10895	8.08746	11.8716	15.9732	20.087	26.4346	37.2623	46.21	60.5167	66.7056	61.3101		37.7	-0.43591
36.35	1.73373	3.53427	5.18222	6.58603	7.31845	9.36313	16.077	20.1664	36.9815	41.1624	69.9405	83.1241	111.872	125.147		37.05	0.99733	1.85182	1.57716	1.94337	3.43874	5.36134	8.07741	9.93898	13.6621	19.1553	21.9629	31.7896	37.6184	47.4756		37.4	0.93404	4.08346	4.55953	5.07223	7.67233	11.2368	16.2661	20.3066	25.9829	37.4575	46.3564	61.1391	66.1806	59.6377		37.75	-0.46637
36.4	1.70311	3.77831	4.8159	6.83006	7.28783	9.48509	15.5276	19.5864	37.6833	41.5286	69.3606	83.185	112.207	123.712		37.1	0.63112	1.45509	1.60768	1.85182	3.43874	5.26979	8.56569	9.57277	13.7232	19.1553	22.1155	31.8506	37.5269	48.0249		37.45	0.72643	4.27867	4.11998	5.24303	6.67125	11.078	16.6566	20.1966	25.8363	37.2499	46.8202	60.8338	64.9964	58.4901		37.8	-0.2527
36.45	1.91663	3.62561	4.69373	6.76892	7.80652	9.69861	14.8561	19.4947	38.0494	41.4369	68.5975	83.9784	112.909	121.729		37.15	0.35646	1.27199	1.48561	1.57716	3.49977	5.14772	8.74879	9.51173	13.9673	19.2468	22.3901	31.9116	37.2522	48.6963		37.5	0.00611	4.01002	4.26637	5.21852	6.70777	10.1135	16.4978	20.4285	25.4456	37.0423	47.699	60.2966	64.8621	57.5012		37.85	-0.28316
36.5	1.94704	4.41897	4.69362	6.92141	7.65383	8.9966	14.8865	19.0369	39.209	42.1997	68.2312	84.6192	115.472	120.782		37.2	0.38698	1.33302	1.54665	1.79079	3.59132	4.90358	8.99293	9.51173	14.1199	19.0942	22.3901	31.698	37.0386	49.3982		37.55	0.11588	3.65592	4.55924	5.02311	6.73209	10.1379	16.4245	19.6105	25.3478	36.6759	47.5768	59.1857	64.7765	57.0373		37.9	-0.49673
36.55	1.00089	4.63248	4.29679	6.86027	7.25699	8.9965	14.1845	19.7082	40.0023	43.6339	68.2006	86.3585	117.09	121.24		37.25	0.20387	1.24147	1.72975	1.97389	3.53029	4.5984	8.62672	9.26759	13.9063	18.667	22.6343	31.5454	36.7944	49.4592		37.6	-0.36029	3.19195	4.73004	5.27936	7.48883	9.97906	15.4966	19.2076	25.2745	35.6993	46.7344	57.2691	64.8375	56.8663		37.95	-0.64927
36.6	1.0313	4.90704	4.78497	6.09722	7.50103	9.05743	14.4285	19.7386	40.3074	45.4344	67.8953	86.5721	117.731	122.583		37.3	0.02077	1.27199	1.94337	2.00441	3.40822	4.81203	8.13844	8.9319	13.6926	18.4534	22.7869	31.2708	36.3977	49.032		37.65	-0.18949	2.99654	5.07174	4.85201	7.81832	10.2475	15.4721	18.6582	25.1767	35.1621	45.3794	55.6699	65.5698	55.4868		38	-0.71025
36.65	0.45137	4.75434	4.66279	6.00556	7.89765	9.85078	14.0317	20.0436	40.0632	46.4719	67.9562	86.9382	116.449	124.414		37.35	-0.25389	1.08888	2.21803	2.06544	3.56081	4.99513	7.92482	8.62672	13.3875	18.1482	22.7564	30.6604	36.1841	48.3606		37.7	-0.31166	3.64342	5.14489	5.08385	8.03795	10.6136	15.3988	18.5848	25.4208	34.8934	43.6459	53.7167	65.6673	54.0951		38.05	-0.71019
36.7	0.05453	4.23544	5.0289	5.97494	8.38583	10.6746	14.5809	19.9215	39.0865	47.4788	67.6205	85.9615	116.265	124.536		37.4	-0.34544	1.05836	2.157	1.97389	3.53029	4.87306	7.86378	8.47414	13.3264	17.6599	22.8479	30.0806	35.7569	47.4146		37.75	-0.32396	3.53346	5.07155	4.70533	7.80592	10.8699	15.8992	19.4758	25.0789	34.7713	43.3284	52.7034	65.6062	53.4602		38.1	-0.49652
36.75	0.11546	4.50999	4.96776	6.79881	8.01951	10.7356	14.7944	19.8603	38.6592	48.2112	68.5969	86.2666	115.411	125.482		37.45	0.02077	1.08888	2.00441	1.91286	3.53029	4.90358	8.04689	8.71828	13.6926	17.5379	22.9395	30.1111	35.4211	46.5906		37.8	0.00553	3.47233	4.24137	5.02262	7.25651	11.4313	16.3385	19.6344	25.1764	33.9045	43.5968	51.9831	65.1789	53.3503		38.15	-0.58802
36.8	0.0238	4.23523	4.93713	6.52405	7.74475	10.9491	15.5267	19.5856	37.8961	49.8285	69.2987	86.358	114.678	126.153		37.5	0.14284	0.93629	1.88234	2.00441	3.77443	4.68996	8.29103	8.9319	13.9978	17.9041	23.0005	30.3247	35.3601	45.7361		37.85	0.44489	3.13043	4.04596	5.03473	7.19537	11.419	16.2652	19.9883	25.1641	33.0132	44.085	51.1651	64.898	53.7408		38.2	-0.67952
36.85	0.96974	4.11305	5.15065	6.37135	7.22585	10.6133	15.1604	19.2192	37.4077	50.3777	70.4583	86.7546	114.77	128.014		37.55	0.02077	0.93629	1.6382	2.06544	3.71339	4.56789	8.44362	8.90138	13.9063	18.2092	23.0615	30.7215	35.4211	44.6069		37.9	1.34811	3.70406	3.71627	5.12008	6.69479	12.0048	16.9731	19.9516	25.4082	32.3662	43.9629	50.3105	64.727	53.9116		38.25	-0.70998
36.9	0.78653	3.59415	4.78434	6.49332	7.40885	10.7048	14.4279	19.3412	36.5836	51.4457	71.1601	86.5714	115.319	127.953		37.6	0.05128	1.24147	1.6382	2.157	3.68288	4.62892	8.32155	8.99293	13.6926	18.6365	22.8479	31.3013	35.5127	43.3557		37.95	1.23815	4.07018	4.11901	4.93688	7.07311	11.7606	16.4725	20.1346	25.8597	31.5482	43.0228	48.4916	63.8968	54.6683		38.3	-0.832
36.95	0.78643	2.98369	4.9063	6.70684	7.31719	9.7586	13.6038	19.4327	37.1023	51.0184	72.4417	87.3038	116.692	128.838		37.65	0.11232	1.21095	1.6382	2.40114	3.65236	4.56789	8.29103	9.17604	13.6316	18.667	22.2681	31.5454	35.6958	42.6538		38	1.23805	3.85035	3.9236	4.48512	7.03639	11.3821	15.8499	20.22	25.7864	31.3406	43.1692	46.8924	63.0545	55.4495		38.35	-0.5878
37	1.06098	3.47187	4.47895	7.28657	7.74433	9.63642	13.0849	19.7072	37.621	51.5981	73.4181	88.5243	116.906	129.662		37.7	-0.1013	1.1194	1.54665	2.27907	3.59132	4.38478	8.01637	9.17604	13.3875	18.3924	22.0545	31.6675	35.6348	42.074		38.05	0.7985	3.42301	4.7902	4.74137	6.86539	10.5031	15.0929	20.0856	25.9206	30.8278	42.7541	45.3053	62.4318	56.3161		38.4	-0.28257
37.05	1.39657	3.07504	4.7535	6.95077	7.98837	9.20907	13.7867	18.9442	38.5365	50.7435	74.4556	89.7144	117.699	132.622		37.75	0.0818	1.42458	1.48561	2.12648	3.59132	4.35426	7.83327	9.29811	13.3569	18.1482	22.0239	31.7896	35.3601	41.5247		38.1	0.71295	2.93463	4.82672	4.19196	6.8653	9.58746	14.5679	20.525	25.9205	30.3882	42.0215	44.1944	62.0777	57.5123		38.45	-0.34355
37.1	1.48802	3.7158	4.96702	7.59153	7.37791	9.23948	14.2444	18.3947	39.0857	50.7739	74.6386	90.1721	116.356	135.033		37.8	0.17336	1.54665	1.72975	2.30959	3.59132	4.23219	7.77223	9.20656	12.9907	18.1482	22.085	31.8506	35.5737	41.3721		38.15	0.56637	3.15426	5.21725	4.30172	6.25485	9.57516	14.873	20.7934	25.5664	30.4003	41.6308	44.3286	62.0044	57.8418		38.5	-0.74023
37.15	1.24377	3.8988	4.84484	7.10315	7.46936	9.48352	15.3734	18.2726	39.3297	49.9498	74.7606	88.9818	115.959	137.23		37.85	0.26491	1.69923	1.76027	2.3401	3.53029	4.11012	7.92482	8.99293	12.4109	18.2703	22.1765	31.637	36.1841	41.3416		38.2	0.35875	2.94664	5.15612	4.61901	6.43785	9.34313	15.0438	20.8299	25.493	29.9974	40.9838	45.0731	61.8456	57.8417		38.55	-0.98432
37.2	0.96901	4.23439	5.33302	6.98097	7.49977	9.39186	15.4343	18.7608	39.3296	49.3394	74.5164	87.0896	115.013	137.261		37.9	0.53957	1.91286	1.8213	2.27907	3.59132	4.50685	7.95534	9.05397	12.0447	18.3008	22.2376	31.9116	36.5808	41.4026		38.25	0.56617	3.17848	5.1194	4.80201	6.57203	10.2219	15.2024	20.7078	25.2366	30.0584	41.2888	46.3792	62.9319	58.3176		38.6	-1.13685
37.25	1.67081	4.53946	5.24136	6.95035	8.11001	9.69693	15.9225	18.6691	38.7802	48.4543	74.4247	85.4721	115.929	135.277		37.95	0.81422	1.8213	1.79079	2.157	3.83546	4.65944	7.95534	9.115	11.9226	18.3008	22.2681	32.1558	36.7029	41.5857		38.3	0.44401	3.11735	4.61881	5.13151	7.30436	10.8444	15.4465	19.9508	25.4318	30.3146	41.4596	47.5998	65.2633	58.3908		38.65	-0.95369
37.3	1.82329	4.11211	5.60747	6.43144	8.38457	9.02544	16.2581	18.3333	38.719	47.4776	74.0584	84.3733	116.508	132.744		38	0.72267	1.6382	1.33302	1.94337	3.86598	4.65944	7.83327	9.08449	11.648	18.0261	22.207	32.0947	36.886	41.9824		38.35	0.73688	2.8609	4.38678	5.27789	7.07233	11.2593	15.6783	19.8897	26.1641	30.2901	41.7769	47.7584	66.5816	58.4273		38.7	-0.55691
37.35	2.1894	4.20356	4.93598	6.12616	8.07929	9.45258	16.3801	18.7299	38.8105	46.8671	73.8447	84.5868	117.21	130.882		38.05	0.6006	1.72975	1.02785	1.72975	4.01857	4.72047	7.46706	9.14552	11.4954	17.6599	22.4817	31.8506	36.947	42.3181		38.4	0.28512	2.93405	4.81393	5.81491	7.07223	11.2714	16.3008	19.9751	26.518	30.7783	42.2773	47.1479	66.6425	58.5127		38.75	-0.40427
37.4	2.18929	4.41707	4.20345	5.27156	8.26229	9.42196	16.8988	18.7603	39.4207	46.2872	74.9737	84.6783	117.973	131.767		38.1	0.4175	1.91286	0.87526	1.79079	3.92702	4.75099	7.34499	9.26759	11.7395	17.6599	22.5427	31.8506	36.886	42.5928		38.45	0.0653	2.82409	4.87487	5.65612	7.47496	10.6854	16.4471	20.0238	27.055	31.7548	41.9598	46.1346	65.3851	58.7689		38.8	-0.43473
37.45	1.39573	4.56956	4.20334	5.97336	8.17063	9.45237	16.8376	19.5842	39.9089	46.8974	75.1872	85.1665	120.14	132.774		38.15	-0.04027	1.72975	0.93629	1.69923	3.40822	4.56789	7.49757	9.05397	11.77	17.8736	22.5122	31.9727	36.825	42.7454		38.5	0.22389	2.73854	5.38746	5.7903	7.26735	10.7341	16.5447	20.7195	26.7742	33.134	41.5813	46.1223	64.0911	59.6111		38.85	-0.40416
37.5	1.63976	4.72204	4.08117	6.36999	8.04845	9.29967	17.0511	19.5536	40.6412	46.0733	75.2176	84.1593	122.428	134.574		38.2	-0.16234	1.69923	1.1194	1.57716	2.8589	4.65944	7.77223	8.80983	11.709	18.1482	22.6343	31.8506	36.4588	42.8064		38.55	0.68766	2.46989	4.77702	5.74137	7.57243	10.5143	16.7155	20.8903	26.3712	34.3424	41.5324	48.3927	63.1999	60.4045		38.9	-0.43462
37.55	1.54811	4.53883	4.6609	6.64454	6.94972	8.96388	16.5933	19.4924	41.343	45.5239	75.0649	83.1826	123.588	136.1		38.25	-0.22337	1.6382	1.54665	1.72975	2.64528	4.81203	7.92482	8.68776	11.648	18.3313	22.8479	31.6675	36.2756	42.5623		38.6	1.09039	2.23785	4.88678	5.607	7.42584	10.5875	16.5201	21.171	25.7364	34.5254	41.4468	50.4556	62.0645	61.442		38.95	-0.77026
37.6	1.67007	4.47769	4.44717	6.82754	6.55288	9.20791	17.0204	19.0956	41.3734	44.4252	76.0414	81.382	124.351	138.45		38.3	-0.19286	1.6382	1.66872	1.88234	2.58424	4.75099	7.95534	8.71828	11.5564	18.4839	23.0005	31.4233	36.4893	42.074		38.65	1.16354	2.32321	4.08102	5.48483	7.3525	10.978	16.5444	20.7558	25.0527	34.8794	41.52	51.9326	61.2343	62.7114		39	-0.9228
37.65	1.82255	4.01982	4.69121	6.15605	6.55278	8.8416	16.7762	18.3326	41.2207	44.9439	76.4075	80.3748	125.297	139.579		38.35	0.11232	1.6382	1.66872	2.03493	2.49269	4.87306	7.74171	8.96242	11.3733	18.4839	22.97	31.2708	36.825	41.5857		38.7	1.79821	2.37194	3.94664	4.97203	7.21813	10.7216	16.642	20.2308	24.8695	34.867	41.8251	53.0677	61.0023	62.9798		39.05	-1.13637
37.7	0.6933	3.25677	5.42352	5.82025	6.21698	8.99408	16.3793	18.2104	41.068	45.249	76.8346	79.276	126.426	140.83		38.4	0.53957	1.51613	1.72975	2.24855	2.6758	4.9341	7.43654	9.20656	11.4954	18.3618	22.8174	31.1487	37.1301	41.1279		38.75	1.63942	3.14088	4.01979	5.30153	6.76637	10.7581	16.9592	20.4138	24.6131	34.5984	42.2522	53.4094	60.7092	63.7488		39.1	-1.19735
37.75	-0.06975	3.53133	5.54549	5.14876	6.85774	8.32259	15.891	17.783	41.7088	45.6151	76.3768	78.8792	127.524	140.067		38.45	0.75319	1.05836	1.76027	2.3401	2.73683	4.9341	7.25343	9.20656	11.77	18.2703	22.5733	31.0266	37.3132	40.7312		38.8	1.29752	3.29948	3.94645	5.41129	6.4611	10.5138	17.2277	19.9865	24.967	34.9645	42.9723	53.446	60.2575	65.1525		39.15	-0.92264
37.8	-0.31399	3.59226	5.75901	5.08762	7.43747	7.89524	15.3415	18.2712	42.5327	46.1032	76.5293	77.811	127.921	140.158		38.5	0.6006	0.81422	1.57716	2.21803	2.95045	4.87306	6.91774	8.9319	11.8311	17.9651	22.4817	30.6909	37.5574	40.4871		38.85	1.28522	3.81207	4.32477	5.54547	5.71637	10.5992	16.6172	19.9742	25.5406	35.0254	43.1187	52.2984	59.1343	66.7882		39.2	-0.49534
37.85	0.35729	3.40905	5.45372	5.27062	8.29186	7.8341	15.4024	17.9049	43.6923	46.1642	76.6207	77.5973	128.226	140.982		38.55	0.47853	0.84474	1.57716	2.157	3.3777	4.65944	6.6736	8.87086	12.0447	17.5684	22.146	30.2637	37.5574	40.426		38.9	1.06539	4.0317	4.49557	5.86276	5.55758	10.9287	16.434	19.8764	25.4795	35.4648	43.0332	50.8945	58.3286	68.4238		39.25	-0.28166
37.9	1.51685	3.89722	4.62965	5.81983	8.26124	7.55933	15.677	17.9048	44.6077	46.927	76.9563	78.238	127.371	142.386		38.6	0.17336	0.90578	1.69923	2.06544	3.68288	4.47633	6.6736	8.84035	12.3194	17.4463	21.9629	30.2942	37.4048	40.6091		38.95	1.30944	3.38463	4.82506	5.45983	5.97252	10.892	16.5438	19.7543	25.3939	36.1483	43.3627	50.5526	58.0966	70.2181		39.3	-0.31213
37.95	2.37124	3.6835	4.41592	5.85024	7.62026	8.04751	16.0736	18.0268	44.8822	46.7438	76.8341	79.7943	126.73	143.21		38.65	-0.00975	1.30251	1.39406	1.8213	3.71339	4.56789	7.03981	8.47414	12.4414	17.5684	21.8408	30.1721	37.1912	41.0669		39	0.94313	2.85963	4.34889	5.21559	6.32643	10.9041	16.8001	20.1204	25.7722	35.9041	43.8753	50.1985	57.9011	72.2688		39.35	-0.40363
38	2.06596	3.77494	4.50736	5.0872	7.95585	7.40653	15.9515	17.752	45.2483	48.1475	76.2847	80.9539	125.723	144.614		38.7	-0.00975	1.57716	1.14992	1.60768	3.62184	4.9341	7.16188	8.10792	12.3194	17.3242	21.7188	29.6838	37.1607	41.5552		39.05	0.882	2.35905	4.64176	5.09342	6.75358	11.1481	17.0197	20.6086	26.1994	35.5378	45.1325	49.5148	57.4738	73.8312		39.4	-0.70875
38.05	1.7912	3.86639	4.62933	4.53778	7.86419	7.40643	15.6157	18.3622	44.7905	48.7577	75.2775	81.3505	126.73	144.461		38.75	0.14284	1.48561	1.08888	1.54665	3.25563	5.23927	7.03981	7.86378	12.4109	16.9275	21.6272	29.3482	36.947	41.6162		39.1	1.0528	2.28571	4.32428	4.98346	6.7901	11.3922	16.6656	20.9747	26.9317	35.2081	45.7672	50.1983	57.2662	74.4659		39.45	-0.61714
38.1	1.42488	3.86629	5.02595	4.84285	8.38289	7.43684	16.0428	18.6368	45.126	49.2764	74.4229	81.7471	127.554	143.972		38.8	0.44801	1.36354	1.21095	1.36354	2.76735	5.48341	7.07033	7.8943	12.3194	16.6529	21.8713	29.5008	36.7944	41.7078		39.15	0.74752	2.24899	4.38522	5.12985	6.72897	11.7583	16.5556	21.2187	27.3955	35.0371	45.7793	51.8462	56.143	74.1728		39.5	-0.43398
38.15	1.1196	4.26291	4.96481	5.14792	8.4133	7.71139	15.9511	19.4301	45.0344	49.0627	73.9956	81.3808	128.622	140.86		38.85	0.53957	1.21095	1.57716	1.33302	2.58424	5.81911	7.13136	8.01637	11.9837	16.5613	22.4512	29.6838	37.0081	41.7688		39.2	0.64977	1.88268	4.8612	4.97106	7.09508	10.9403	16.4579	20.6205	27.0536	34.9149	45.9012	53.8602	55.3617	74.4657		39.55	-0.58652
38.2	1.42467	4.20177	5.48351	5.97179	8.26061	8.93199	15.6459	19.8268	45.5836	48.3912	73.5072	81.5943	128.042	137.258		38.9	0.23439	0.87526	1.69923	1.39406	2.64528	6.03273	7.25343	8.32155	11.709	16.5613	22.909	29.6533	37.1301	41.7383		39.25	0.19801	2.00465	4.83668	5.14186	7.40016	10.3421	15.6643	20.2175	26.907	34.6096	45.3884	55.8621	55.2639	75.2835		39.6	-0.46439
38.25	1.33301	3.56079	5.51392	6.521	8.53516	9.72534	15.188	19.7656	46.0718	48.0859	73.1714	81.5027	128.561	133.566		38.95	-0.00975	0.84474	1.39406	1.42458	2.70631	5.78859	7.58913	8.32155	11.6174	16.5003	23.0615	29.5008	37.0386	41.5247		39.3	-0.14388	2.01676	4.6779	5.215	7.8029	10.0002	15.1515	20.6203	26.3087	34.8537	44.5827	56.7287	55.63	76.3942		39.65	-0.61693
38.3	2.12636	3.01137	4.6288	6.36831	8.19936	10.0915	14.5165	19.674	45.4918	47.506	72.4389	82.8453	130.026	132.864		39	-0.19286	0.75319	1.24147	1.76027	3.01149	5.48341	7.8943	8.22999	11.6785	16.3477	22.8174	29.0735	36.6724	41.2805		39.35	-0.02191	2.12653	3.88434	4.92194	7.88825	9.7193	15.2857	20.8521	25.8204	36.0132	44.2896	57.1436	56.8873	76.9678		39.7	-0.58636
38.35	2.0347	2.8892	4.50663	6.30717	8.13822	9.69462	14.669	18.8499	44.9729	48.8182	71.1265	84.3101	131.582	132.741		39.05	-0.28441	0.72267	0.99733	2.06544	3.07252	4.96461	7.8943	8.4131	11.77	16.012	22.909	28.8599	36.0925	40.8533		39.4	-0.19291	2.40719	4.12838	4.98288	7.31442	10.0488	15.5175	20.7666	25.8569	36.5991	44.1064	57.2046	57.7539	76.9433		39.75	-0.61682
38.4	1.85149	2.49236	4.32342	5.72723	7.43621	9.17571	14.2721	19.1244	44.2709	50.2524	69.6921	85.7138	132.955	132.619		39.1	-0.13182	1.02785	0.87526	2.09596	3.04201	4.68996	7.83327	8.4131	12.0447	15.9204	22.8479	29.0735	35.6653	40.5481		39.45	-0.07093	2.44372	3.83532	4.45788	7.02135	9.65807	16.079	20.4735	25.6004	37.2948	43.8133	56.1302	57.6561	76.7479		39.8	-0.58625
38.45	1.39363	2.85847	4.78108	5.97126	7.46662	8.9925	13.9669	19.1243	44.6065	51.473	68.807	86.4766	132.863	131.246		39.15	-0.19286	1.21095	1.02785	2.3401	3.1946	4.47633	7.40602	8.13844	12.1362	15.8289	22.6648	29.5618	35.7263	40.0598		39.5	-0.04662	2.69997	3.50563	4.10377	6.74049	9.73122	16.3352	20.5466	25.7224	38.2102	44.3259	55.4954	57.2288	77.114		39.85	-0.61671
38.5	1.08834	2.94992	5.1777	5.94064	7.37497	8.6567	13.2954	19.3073	44.5454	52.1748	68.4101	86.9953	133.077	129.628		39.2	0.32594	1.57716	1.18044	2.09596	3.07252	3.98805	7.13136	7.65016	12.3194	15.7373	22.5733	30.3858	35.6958	39.8157		39.55	0.05094	2.7487	3.4445	4.33561	6.88688	9.77995	16.6403	21.0592	26.2106	38.8327	44.3014	55.9591	57.3019	77.4191		39.9	-0.67769
38.55	0.72203	3.19395	5.1776	5.54381	7.1002	8.32091	12.868	19.4903	44.7894	52.6629	69.6917	87.7276	132.924	128.194		39.25	0.57008	1.51613	1.48561	1.8213	3.22511	4.20167	6.94826	7.16188	12.6856	15.8594	22.3291	30.9961	35.6958	39.7852		39.6	0.60016	2.94391	3.4444	4.4942	7.19196	9.71881	16.8966	21.5108	25.71	38.9302	44.2647	56.9234	57.2408	77.4922		39.95	-0.49454
38.6	1.08813	3.71265	5.08594	5.90991	7.00854	7.98511	13.2952	19.124	45.2776	53.6394	70.8513	88.3074	133.534	126.729		39.3	0.69215	1.72975	1.69923	1.42458	3.34718	4.4153	6.70412	7.03981	12.8992	15.7983	22.3901	31.1487	35.2686	39.8767		39.65	0.12399	3.23678	3.98141	4.68942	7.06979	10.1704	16.1884	21.8159	24.709	38.8813	44.4355	57.436	57.6069	78.3344		40	-0.34189
38.65	1.51528	4.04823	5.2079	6.2455	6.73378	7.8019	13.0509	19.3375	44.8502	54.036	71.9498	89.4059	133.443	127.217		39.35	0.26491	1.60768	2.00441	1.42458	3.49977	5.1172	7.00929	7.10084	13.2044	16.2256	21.9019	31.3318	35.0549	40.426		39.7	-0.14466	2.32116	3.94469	4.55504	7.50915	10.036	15.932	21.6693	24.0863	38.4662	44.4476	58.0829	58.4003	78.5663		40.05	-0.18925
38.7	1.30155	4.23123	5.17728	5.87918	6.36747	8.25955	13.0813	19.8257	44.8196	54.8294	71.2478	89.5279	133.534	127.492		39.4	0.20387	1.60768	1.8213	1.69923	3.40822	5.51393	7.16188	7.31447	13.0213	16.7444	21.4746	31.4844	34.8718	40.7007		39.75	-0.19359	1.96706	4.44508	4.55495	7.7654	9.69411	16.2737	20.6804	23.8176	37.9534	44.7527	58.4978	59.2302	78.4441		40.1	-0.12816
38.75	1.45403	4.07854	5.45183	5.60442	6.70305	8.71721	13.3559	20.436	44.2092	54.4936	70.912	89.8329	131.856	127.431		39.45	0.17336	1.24147	1.88234	2.00441	3.04201	5.81911	7.49757	7.74171	13.0213	17.6599	21.1084	31.9422	34.6277	40.9448		39.8	-0.08382	1.91813	4.67692	5.17741	7.65544	10.0358	16.3102	20.2043	24.2692	38.1486	44.9479	59.4377	60.9147	77.8581		40.15	-0.06708
38.8	1.08771	3.86481	5.32966	5.97053	7.34382	9.0528	13.4779	21.1683	43.6597	53.7916	70.1795	90.3211	129.719	126.545		39.5	0.4175	1.36354	1.54665	2.09596	2.52321	5.81911	7.34499	8.13844	12.9297	18.1787	21.0779	32.0947	34.5972	40.9753		39.85	0.52643	2.0401	4.61579	5.20172	7.56989	10.0357	15.9439	20.8634	24.9161	38.356	44.7159	59.8404	62.2696	76.3931		40.2	-0.21961
38.85	0.59933	3.52902	4.93282	5.90939	7.86251	9.41891	13.7829	20.1306	42.9577	53.1201	70.6982	91.3891	128.163	126.484		39.55	0.32594	1.18044	1.57716	2.18752	2.06544	5.84962	7.31447	8.74879	12.7161	18.2703	21.0169	32.0642	34.4141	41.5552		39.9	0.72165	2.84567	5.12838	4.76217	7.27682	9.86471	15.5166	21.6567	25.2334	38.4292	44.3984	59.3642	63.0996	74.7817		40.25	-0.49421
38.9	0.69078	3.19322	5.57359	5.84825	8.22862	8.86949	13.2945	18.9403	41.7064	52.5401	70.6981	91.9688	127.919	126.423		39.6	0.44801	0.96681	1.24147	2.06544	1.97389	5.636	7.13136	9.08449	12.4719	18.0567	21.0474	31.5759	34.0784	42.1655		39.95	0.83141	3.01647	5.01842	5.12829	7.057	10.0721	15.3089	22.1815	25.8192	38.0628	44.4227	58.5951	63.8075	73.9149		40.3	-0.49416
38.95	1.05688	3.19311	5.66503	5.81762	7.46557	8.77783	13.1418	18.4214	41.6453	53.0588	70.759	90.9006	130.177	127.339		39.65	0.69215	0.47853	1.24147	1.97389	2.12648	5.36134	7.16188	9.38966	12.1362	17.5073	21.261	31.3928	33.7427	42.7149		40	0.8069	3.16286	4.70094	5.1404	6.97145	10.2796	15.4675	22.9749	25.8801	37.1472	44.1541	57.7649	65.0403	73.28		40.35	-0.76877
39	1.54506	3.58973	5.20717	6.18373	7.3434	8.01478	12.745	17.9635	41.1874	52.662	70.9115	89.3746	130.909	128.285		39.7	0.90578	0.0818	1.36354	1.45509	2.09596	4.96461	6.70412	9.42018	11.9226	17.0191	21.5662	31.1487	33.5291	43.02		40.05	0.33073	3.11393	4.22477	5.26237	6.77604	10.7555	15.7848	22.9626	25.7214	36.549	44.7521	56.7516	66.0168	71.5588		40.4	-0.67716
39.05	1.75858	3.83377	4.9324	6.21414	6.94656	7.37381	12.0125	19.1841	41.4314	52.5093	71.4302	86.3228	130.817	128.437		39.75	1.08888	0.11232	1.72975	1.21095	2.3401	4.9341	6.52101	9.48122	11.709	16.7139	21.9019	31.3623	33.5901	43.4473		40.1	0.23297	2.43024	3.38239	5.22565	6.7027	11.3292	15.8214	22.6085	26.0631	35.9507	46.0338	55.8604	66.9932	69.691		40.45	-0.64659
39.1	1.6364	3.68108	4.56609	5.75627	6.30559	7.43474	11.341	21.0151	42.0112	52.4787	72.1015	84.0339	128.925	128.406		39.8	0.78371	0.35646	2.03493	0.78371	2.55373	4.62892	6.52101	9.42018	11.5259	16.7139	21.9934	31.1182	33.4375	43.7525		40.15	0.48922	1.95407	3.3945	4.85934	7.11764	11.1948	16.0166	22.0224	25.9409	35.1572	47.0957	55.3232	68.1894	67.5425		40.5	-0.15825
39.15	0.90387	4.04718	4.10822	6.12238	6.21393	7.5567	11.0052	22.1441	41.8279	52.9974	71.5216	82.4774	126.911	128.376		39.85	0.63112	0.84474	1.79079	0.93629	2.73683	4.56789	7.07033	9.69484	11.3428	16.7749	21.6577	30.8435	33.6206	43.8745		40.2	0.19616	2.29577	3.44323	4.90807	6.65368	11.3656	15.8089	21.4852	25.3426	34.7176	47.3641	54.9203	68.7508	66.4193		40.55	-0.09716
39.2	1.11739	3.7419	3.95553	5.96969	5.8171	8.74679	11.2492	22.6933	41.5227	54.4011	72.2539	82.5383	125.202	129.627		39.9	0.35646	0.96681	1.6382	0.96681	2.73683	4.20167	7.1924	10.0305	11.2818	16.8054	21.322	30.1111	33.5901	43.9661		40.25	0.14723	2.55202	3.84596	4.45631	6.3362	11.0847	15.0032	21.2166	25.367	35.3157	48.1697	54.7737	69.2146	66.3093		40.6	-0.18866
39.25	1.02573	3.49766	3.9249	5.75596	5.84751	9.78428	12.1036	21.7777	41.4615	55.6217	72.9862	84.1556	123.523	130.786		39.95	0.6006	1.24147	0.96681	1.39406	2.8589	4.26271	7.25343	10.0916	11.4038	17.0191	20.8643	29.8364	33.8037	44.1492		40.3	0.14714	2.96696	3.83366	4.4318	5.79899	10.9748	14.3561	21.4728	25.1838	35.401	48.9997	54.5783	69.6295	66.5045		40.65	-0.12757
39.3	0.93407	3.31445	3.80273	5.99999	6.1831	9.9978	12.012	21.8081	40.9121	56.293	74.8171	85.6814	122.333	132.404		40	0.81422	1.14992	0.90578	1.39406	2.55373	4.29323	7.10084	9.93898	11.4038	17.2327	20.8643	29.5008	33.6816	44.6985		40.35	0.46442	3.0279	3.49176	4.85895	5.05426	10.9381	13.9288	21.3507	25.1715	35.7061	49.2315	54.4195	69.5928	66.7486		40.7	-0.12752
39.35	1.39173	3.37538	3.92469	6.30506	6.8849	9.90614	11.9813	21.9301	40.6068	56.6591	75.6715	87.6954	121.509	133.106		40.05	0.96681	1.24147	0.90578	1.24147	2.24855	4.44582	7.10084	9.57277	11.7395	17.5073	20.6812	29.5313	34.1394	44.8511		40.4	1.06247	2.30758	3.50387	5.05417	4.91989	10.8525	13.7334	20.9355	25.3545	36.7558	49.8662	54.0166	68.5918	67.4443		40.75	0.08616
39.4	1.87991	3.00906	3.68045	6.70169	7.67825	9.47879	12.3169	21.3806	39.9658	56.5674	77.594	88.794	122.577	133.044		40.1	1.1194	1.39406	1.30251	1.18044	2.12648	4.50685	7.1924	9.4507	11.5564	17.3242	20.8643	29.5618	34.353	45.0037		40.45	0.62292	2.23424	3.41833	5.42028	5.16393	10.7547	13.3549	21.1185	25.2689	38.2816	49.8783	52.9911	67.493	68.7504		40.8	-0.18845
39.45	1.84929	3.16154	4.4738	7.00676	8.22746	9.05144	12.622	21.0448	39.3554	56.6894	78.6925	89.5873	123.523	133.258		40.15	0.90578	1.39406	1.48561	1.02785	2.12648	4.62892	7.28395	9.14552	11.709	17.1411	20.9253	29.2566	34.6277	44.8511		40.5	0.65944	2.46608	3.8943	5.61549	5.73756	10.6814	13.4646	21.448	25.0125	39.6365	50.2078	51.5994	66.1746	69.8001		40.85	-0.06633
39.5	1.26935	3.58868	4.96197	6.30475	8.04425	9.08185	13.3543	20.4344	38.6839	57.0555	78.9671	89.6483	123.919	132.068		40.2	0.66164	1.36354	1.33302	1.24147	2.30959	5.23927	7.52809	9.23707	11.4649	16.6223	21.3526	28.982	34.7803	45.0342		40.55	0.64714	2.6735	4.59001	5.38346	6.59196	10.5104	13.4279	21.8263	25.1222	40.6862	50.7936	50.6227	64.612	70.0807		40.9	-0.15782
39.55	0.68941	3.49703	4.68721	5.66377	7.64742	8.74605	13.0185	20.2512	37.6157	58.0014	78.6618	89.7397	123.37	131.762		40.25	0.11232	1.14992	1.36354	1.30251	2.18752	5.36134	7.43654	9.115	11.4343	16.5613	21.261	28.5852	34.9634	44.9426		40.6	0.26862	2.79548	4.66315	5.1026	7.27546	10.0831	13.9527	22.4244	25.9156	41.6382	51.4771	51.5382	63.0494	69.9219		40.95	0.23896
39.6	0.41465	3.68003	4.04624	5.96884	6.91489	8.28818	12.8658	19.9459	37.7682	59.3441	77.7157	91.2349	121.875	131.457		40.3	-0.04027	1.14992	1.30251	1.51613	2.21803	5.54445	7.52809	9.20656	11.0681	16.3477	21.1389	28.6157	35.0855	45.1257		40.65	-0.18314	2.52682	4.96823	5.32223	7.31198	10.144	14.5141	22.6196	26.7334	42.7978	51.4526	53.1372	61.792	70.0683		41	0.23901
39.65	0.71972	3.40526	3.92406	6.15184	5.96874	8.65429	13.6897	19.5796	38.47	59.7407	77.7156	92.2419	121.691	131.335		40.35	-0.31493	0.99733	1.79079	1.30251	2.157	5.05617	7.25343	8.96242	11.0681	16.3477	20.7727	28.3411	34.9329	44.9121		40.7	-0.42738	2.81969	4.71178	5.37096	7.18981	9.72887	14.7582	22.8026	26.6967	44.3114	51.0375	54.9926	60.7421	70.349		41.05	0.17803
39.7	1.48255	3.49671	3.86292	6.06019	6.30433	8.47108	13.9032	19.1827	39.538	60.6256	77.2577	93.6151	121.63	129.351		40.4	-0.31493	1.30251	1.79079	1.08888	2.21803	4.68996	7.40602	8.74879	11.0376	16.0425	20.6506	28.4021	34.7193	44.668		40.75	-0.74486	3.02712	4.45534	5.56618	6.77467	9.69215	15.344	22.8147	26.3059	44.9338	50.8176	56.0545	60.1804	70.9348		41.1	0.2086
39.75	1.574	3.40505	3.80178	5.81594	6.15163	8.74563	14.3303	19.4878	41.1553	61.0222	77.8374	93.9812	122.607	126.147		40.45	-0.31493	1.45509	1.76027	0.96681	2.30959	4.23219	7.40602	8.50465	11.0376	15.7068	20.437	28.2495	34.3225	44.1492		40.8	-0.23226	2.48991	4.06462	5.40739	6.55485	10.1681	15.8688	22.5949	26.0983	44.6042	50.0729	56.1398	60.5099	70.8737		41.15	0.26969
39.8	1.69596	3.83219	4.22892	5.5717	6.48722	8.71501	14.2997	19.3046	41.7045	61.0221	78.6308	94.2558	122.729	124.377		40.5	-0.22337	1.57716	1.51613	0.93629	2.43166	4.26271	7.92482	8.22999	10.885	15.5237	20.2539	28.5852	34.0784	43.8745		40.85	0.58551	2.18464	3.39313	5.0777	6.84772	10.3023	16.2105	22.4117	26.2569	44.3355	49.3526	55.7369	60.4732	70.8126		41.2	0.20871
39.85	1.66534	3.77105	3.6795	5.48004	6.91436	8.013	14.2996	19.3045	41.5213	61.2356	79.6072	94.6524	123.522	122.851		40.55	-0.13182	1.33302	1.48561	1.05836	2.58424	4.47633	8.19948	8.35207	10.5188	15.4932	20.3455	28.4937	33.7122	43.5083		40.9	1.03708	2.40426	3.55173	5.17526	6.96969	10.1069	16.0639	23.0952	26.6596	44.0302	48.9619	55.749	60.8149	71.1176		41.25	0.05617
39.9	1.54316	3.52681	3.49629	5.4189	7.12788	7.64668	15.0319	18.8466	41.1245	60.2895	81.133	93.9809	124.956	123.034		40.6	-0.25389	1.08888	1.54665	1.08888	2.64528	4.56789	8.35207	8.4131	10.5188	15.6152	20.4981	28.6768	33.468	43.3252		40.95	1.36657	2.36755	3.35632	5.45593	7.1405	9.9237	16.1493	23.5345	26.4032	43.786	48.5956	56.3715	61.7181	71.264		41.3	0.02571
39.95	1.93979	3.49618	3.80136	5.66293	7.28036	7.64658	15.6727	18.1446	40.3919	59.8927	82.0179	93.2484	124.987	123.43		40.65	-0.437	0.69215	1.42458	1.45509	2.98097	4.68996	8.04689	8.65724	10.3967	15.4932	20.7727	28.6768	33.1934	43.1421		41	0.42653	2.29421	3.00221	5.04079	7.42116	9.7527	16.1126	23.6077	26.1223	43.8225	47.802	56.9207	63.1096	71.0442		41.35	-0.27941
40	1.20726	3.37401	4.56419	5.87645	7.55492	7.92113	15.6421	18.5412	39.4458	59.74	82.1704	92.6074	124.132	125.475		40.7	-0.65062	0.35646	1.14992	1.51613	3.13356	4.50685	7.68068	8.38258	10.5493	15.6458	20.8948	29.104	33.2544	42.9895		41.05	-0.3182	2.18425	3.28288	4.61344	7.38444	9.43522	16.6374	23.8517	26.2199	44.2375	46.9963	57.3356	64.1471	70.6047		41.4	-0.21832
40.05	0.87146	3.12976	4.80823	5.93738	7.12757	8.25672	16.2828	18.6327	38.8048	59.5873	82.567	92.9125	122.789	127.214		40.75	-0.52855	0.14284	0.75319	1.8213	3.34718	4.5984	7.34499	8.26051	10.6714	15.5542	20.9863	29.5313	33.2849	42.5928		41.1	-0.08636	2.14753	3.64899	4.83307	6.73737	9.50837	16.9302	23.8394	26.5128	44.8233	46.2759	57.1402	65.1724	70.0919		41.45	-0.06568
40.1	0.47463	2.855	5.02175	5.29641	6.79177	8.56179	16.8626	18.0527	38.1333	59.8924	82.689	93.4922	122.148	127.611		40.8	-0.52855	0.02077	0.90578	1.85182	3.16408	4.44582	6.97877	7.98585	11.0376	15.7373	21.0779	30.0195	33.4375	42.4097		41.15	0.32858	3.02634	3.84421	4.74753	6.81051	9.44723	16.8691	23.1924	26.5371	45.7632	44.9331	55.7241	66.4785	69.1396		41.5	0.39213
40.15	1.02384	2.73283	4.99113	5.08268	7.21891	8.01237	16.5573	17.778	37.8586	60.6552	82.1396	93.1564	121.843	127.733		40.85	-0.22337	-0.00975	0.93629	2.18752	3.25563	4.78151	6.82619	8.26051	11.0681	15.7983	21.4441	30.1111	33.3154	42.1655		41.2	0.47497	3.24596	3.86852	4.72302	6.89587	9.53259	16.6981	22.5575	26.3295	46.5809	43.6756	53.6488	67.1009	67.9066		41.55	0.51426
40.2	1.35943	2.88531	4.53326	5.78448	7.15777	8.19537	16.2825	17.7169	36.7598	61.4485	81.7732	91.9661	121.843	127.428		40.9	-0.25389	-0.25389	1.30251	2.00441	3.07252	4.9341	6.55153	8.13844	11.1292	15.9509	21.9934	30.2332	33.1934	42.2876		41.25	0.73122	2.79421	3.6487	4.6985	6.39528	9.53249	16.5881	22.6917	26.0608	46.7761	43.2727	52.135	67.1008	67.1863		41.6	0.48379
40.25	1.90864	3.61762	4.71626	6.21162	7.09663	7.82905	15.4584	17.8693	35.2338	62.5776	81.0712	90.9894	123.247	127.916		40.95	0.0818	-0.22337	1.42458	2.00441	3.1946	5.33083	6.6736	8.32155	10.9766	15.8289	22.3901	29.928	33.0408	42.2266		41.3	0.27946	2.69645	3.72184	4.42985	5.88249	9.44694	16.4294	22.6427	25.7799	46.7394	43.2848	51.1095	66.1852	67.1008		41.65	0.3923
40.3	1.93905	3.31234	4.68563	6.51669	7.37118	7.76791	15.0311	18.4796	35.0506	62.9132	80.4913	90.3485	124.955	127.275		41	-0.00975	-0.37596	1.72975	1.76027	2.88942	5.20876	6.70412	8.19948	10.8545	15.6763	22.6953	29.8975	32.8882	42.4402		41.35	-0.26995	2.69636	3.95368	4.30768	5.56501	9.33698	16.0264	22.4595	26.0606	46.6905	43.004	50.377	65.1842	67.0396		41.7	0.42287
40.35	2.45775	3.46483	4.13621	6.18089	7.61522	8.13402	14.8479	18.6931	34.196	62.5163	80.7048	90.623	126.084	124.772		41.05	0.32594	-0.22337	1.72975	1.85182	2.8589	5.17824	6.76515	8.26051	10.7324	15.5237	22.5427	29.6533	32.8882	42.2266		41.4	-0.03812	2.22018	3.75827	4.55173	5.60153	9.65427	16.2705	22.1054	26.7075	46.9101	43.8218	50.792	64.0366	66.7465		41.75	0.42292
40.4	1.75574	2.7323	4.19714	6.15027	7.37097	8.13391	14.2985	18.9676	33.2194	63.0961	80.9794	91.2333	127.03	121.751		41.1	0.4175	-0.22337	2.03493	1.69923	2.64528	4.9341	6.79567	8.22999	10.5799	15.5847	22.3291	29.5313	32.7661	42.2571		41.45	-0.13587	1.85388	3.90466	4.57604	5.50378	10.0326	16.7098	21.7635	26.8295	47.1298	45.1766	52.2933	62.3031	66.4291		41.8	0.27039
40.45	1.75563	2.76271	4.77687	6.02809	7.37087	7.92018	13.6575	20.1577	32.8225	63.4011	80.1858	92.5149	127.335	118.363		41.15	0.57008	0.0818	1.97389	1.8213	2.76735	4.96461	7.10084	8.38258	10.3967	16.012	21.9324	29.2566	32.6441	41.6773		41.5	-0.16038	1.81716	4.05104	4.25856	5.85768	10.1301	16.7341	21.031	26.6463	47.3738	45.8845	53.1844	60.1424	66.5388		41.85	0.27044
40.5	1.14517	2.76261	4.8378	6.69937	7.03507	7.79801	13.8405	20.0356	32.4562	63.8893	78.965	94.6205	128.403	117.02		41.2	0.29543	0.11232	1.66872	1.6382	2.58424	4.96461	7.3755	8.16896	10.1221	16.4087	21.9019	29.0735	32.1253	41.4636		41.55	0.19352	2.08561	4.28288	4.55143	5.89421	10.3864	16.2336	20.7502	27.0734	47.6789	45.9943	52.3786	57.4933	66.551		41.9	0.14842
40.55	1.60283	2.97612	4.89873	6.79082	6.48565	8.22515	14.115	19.7303	31.2659	63.9502	77.1643	96.3904	129.349	117.661		41.25	0.20387	0.23439	1.21095	1.6382	2.70631	5.08668	7.28395	8.13844	10.0305	16.8665	21.8713	28.7378	32.0337	41.2805		41.6	0.55964	2.79352	4.63679	4.61237	6.11384	10.5084	15.6597	20.6402	27.2442	47.8253	45.7867	51.4996	54.8321	66.8194		41.95	0.08744
40.6	1.08393	2.79291	4.47138	6.63813	6.97382	8.80488	14.0234	19.2419	30.5944	63.6755	75.2416	97.8857	129.197	119.278		41.3	-0.13182	0.17336	1.27199	1.42458	2.49269	5.02565	7.10084	8.35207	10.1831	16.836	22.0239	28.219	31.9422	41.5247		41.65	0.69382	3.02536	4.478	4.50241	5.8818	10.4472	14.9516	20.4448	27.122	48.0083	45.0786	51.2675	53.3794	67.7226		42	0.02646
40.65	1.389	2.82333	4.47128	6.72958	7.09579	9.2015	13.9928	18.6009	30.1366	63.9195	75.0584	97.6414	128.464	120.347		41.35	-0.40648	0.17336	1.48561	1.51613	2.61476	4.96461	6.76515	8.80983	10.5799	16.8665	21.9629	27.9138	32.3084	41.5552		41.7	0.95007	2.75671	4.31921	4.38024	5.41784	10.5936	14.4144	20.2494	27.0243	47.8373	44.0287	51.5238	53.0619	68.0643		42.05	0.14858
40.7	1.54148	2.85374	4.41014	6.24119	7.27879	8.6826	12.9245	17.6853	30.3196	64.5603	74.5395	96.7258	126.419	120.743		41.4	-0.52855	0.26491	1.72975	1.42458	2.55373	4.9341	6.91774	8.87086	10.7935	16.5613	21.9324	27.6697	32.3694	41.4331		41.75	0.657	2.79323	3.98952	4.33132	5.1736	11.1062	14.6463	20.6033	27.7688	47.8128	43.3206	52.2439	53.6966	67.9544		42.1	0.14864
40.75	1.66345	3.46399	4.16589	5.69177	7.55334	8.19421	11.8868	17.5326	31.235	65.2316	73.9596	96.8173	124.924	121.689		41.45	-0.28441	0.35646	1.69923	1.6382	2.6758	5.02565	6.91774	8.77931	10.9155	16.5613	21.8103	28.1885	33.0408	41.3721		41.8	-0.12435	3.13493	3.69645	4.2946	5.66179	10.801	14.7804	21.0182	27.903	47.6662	42.9421	53.5988	55.3566	67.2585		42.15	0.20973
40.8	1.938	3.40285	4.34889	5.41701	7.76686	8.37721	11.7341	17.1052	31.7537	65.4146	73.6543	96.512	123.49	124.008		41.5	-0.04027	0.57008	1.51613	1.60768	2.49269	4.90358	7.03981	8.65724	10.6714	16.3477	22.0239	28.4021	33.5596	41.1585		41.85	-0.35638	3.086	3.5987	4.16022	6.05231	10.337	14.817	20.8716	27.6466	47.9102	42.1485	54.795	56.6382	66.1597		42.2	-0.06488
40.85	1.11392	3.40274	3.89102	5.53897	7.64468	8.13296	12.1613	16.8	32.1808	64.56	73.1354	95.5048	122.482	125.809		41.55	0.29543	0.93629	1.21095	1.76027	2.37062	4.87306	6.73463	8.62672	10.5799	16.4087	22.2376	28.8599	34.0174	41.3111		41.9	-0.33206	2.76852	3.80612	4.26999	6.12546	10.4101	14.3042	20.9204	27.5854	48.4594	41.6357	55.5395	57.4804	64.9267		42.25	-0.1869
40.9	1.63262	2.60918	4.16557	5.47783	7.64458	7.70561	12.5274	17.6238	31.845	63.6748	72.6775	94.2229	123.001	127.731		41.6	0.63112	1.51613	1.02785	1.66872	2.18752	4.9341	6.6736	8.56569	10.3662	16.2256	22.6953	29.043	34.1089	41.3111		41.95	-0.2223	2.43884	3.40319	4.36755	5.95446	10.3856	14.2797	21.3964	26.621	48.6302	41.3793	57.1385	57.9808	64.2552		42.3	-0.40047
40.95	1.29682	3.40253	3.73822	5.69135	7.12567	7.46137	13.1071	17.9899	30.9294	64.3461	72.4638	92.697	122.848	129.257		41.65	0.87526	1.66872	1.02785	1.72975	2.37062	5.20876	6.1548	8.35207	10.4578	16.1646	23.0921	29.2566	34.0784	41.9519		42	-0.49095	1.77956	3.40309	4.73366	5.17311	10.1414	14.3284	21.8113	25.9251	48.6668	40.9763	58.7254	57.8953	64.011		42.35	-0.24782
41	1.72396	3.46346	4.19588	5.38607	6.08797	7.49178	13.5953	18.6307	30.2274	65.2921	71.6092	91.5677	122.604	130.752		41.7	0.96681	1.72975	1.1194	1.66872	2.79787	5.42238	6.00221	8.19948	10.4883	16.012	23.2141	29.104	34.4446	42.4402		42.05	-0.84505	1.81608	3.29313	4.64811	4.36735	10.1535	14.2062	22.2873	26.2301	48.9108	41.2204	60.0192	57.8097	64.487		42.4	-0.21725
41.05	1.75437	3.8906	3.98215	5.38596	5.90476	7.30857	13.8698	19.5156	30.4714	65.5666	70.9072	91.4455	121.536	132.4		41.75	0.93629	1.27199	1.45509	1.60768	3.22511	5.4529	5.88014	8.01637	10.8545	15.9509	23.2752	28.7988	34.8108	43.2031		42.1	-1.1015	2.26765	3.20759	4.50153	4.12311	10.483	14.1939	22.7877	27.0723	48.9473	41.3302	61.0323	58.5177	63.9376		42.45	0.05746
41.1	1.23547	3.24963	4.50085	5.56896	6.05724	8.0714	14.6632	20.3089	31.0817	65.475	71.3954	92.2084	120.803	132.705		41.8	0.96681	0.93629	1.6382	1.54665	3.34718	5.48341	6.18532	8.35207	10.9766	15.6763	23.2752	28.5547	35.3296	43.6914		42.15	-0.83304	2.5361	3.69577	3.89108	4.94089	10.4218	14.1084	22.9951	26.8647	48.4345	41.2446	61.6303	59.3843	63.4614		42.5	0.02699
41.15	1.02174	2.73072	4.65333	5.72145	6.17921	8.31544	14.7852	20.7361	31.814	65.0171	71.6699	93.9783	121.505	132.827		41.85	0.87526	0.47853	1.69923	1.54665	3.22511	5.36134	6.45998	8.47414	10.885	15.188	23.5498	28.28	35.2075	43.7525		42.2	-0.17396	2.40173	3.76892	3.58581	5.22155	10.0311	13.9984	22.7508	26.4618	48.3368	41.4886	62.0087	61.7889	62.9608		42.55	0.27119
41.2	0.47232	2.66958	5.26358	5.90445	6.48428	8.10171	14.7851	21.1938	33.2482	64.9254	71.8529	94.7411	123.214	132.858		41.9	0.87526	0.29543	1.45509	1.66872	3.1946	5.36134	6.58205	8.56569	10.6104	14.7913	23.3667	28.5852	35.1465	43.6609		42.25	-0.19847	2.3406	3.3904	3.0486	4.98952	9.94557	14.4133	22.4578	26.1199	47.3113	41.0979	61.1052	64.4256	62.6555		42.6	0.3628
41.25	1.54033	2.48637	5.04985	5.38554	6.6978	7.85746	14.6934	21.4683	33.9195	65.0474	72.158	94.5579	124.19	133.987		41.95	0.66164	0.0818	1.48561	1.54665	3.13356	5.20876	6.39894	8.16896	10.4883	14.5777	23.1226	28.7073	34.4751	43.2947		42.3	-0.35726	2.21843	3.40251	2.53581	4.87956	9.9821	14.8893	21.6154	25.3263	46.8229	41.2809	59.7013	67.1843	62.9484		42.65	0.4544
41.3	1.29608	3.34076	4.77508	5.56854	6.48407	7.97943	15.029	20.8578	34.6213	65.2914	71.5781	94.0085	124.434	136.519		42	0.69215	0.20387	1.27199	1.66872	3.22511	5.30031	6.06325	8.35207	10.763	14.7608	22.5733	29.104	33.9258	43.3252		42.35	-0.34515	1.74226	3.75642	3.19489	4.84284	9.99421	14.6573	21.2369	25.2164	46.4566	41.4883	57.8214	69.4302	63.5098		42.7	0.3629
41.35	1.78426	3.15755	4.77498	4.9886	6.75862	7.73518	14.7237	20.6136	35.14	64.4979	70.8761	92.7571	124.251	140.334		42.05	0.50905	0.23439	1.33302	1.51613	3.07252	5.08668	5.69704	8.53517	11.0071	14.5471	22.207	29.2261	33.5291	43.1421		42.4	-0.17435	1.75436	3.43894	3.87839	4.52536	10.1284	14.2666	21.4321	25.2651	46.1147	41.2319	56.2588	70.7485	65.2798		42.75	0.0883
41.4	1.57053	3.18796	4.19504	5.32419	6.60593	7.55197	14.2048	20.0642	35.4145	63.9179	70.6623	92.7265	124.038	145.278		42.1	0.6006	0.53957	1.21095	1.48561	3.1946	5.20876	5.17824	8.90138	11.709	14.5166	21.7493	29.2566	33.2544	43.3557		42.45	-0.22327	1.77868	3.87829	3.73181	4.61071	10.0795	13.5219	20.8583	25.3138	46.5541	40.829	55.5262	71.6151	66.6957		42.8	-0.09475
41.45	2.05871	2.79113	4.40856	5.41564	6.81945	7.67394	13.6249	19.8504	35.2008	63.0633	70.6622	92.879	124.8	149.52		42.15	0.38698	0.57008	1.42458	1.1194	3.04201	4.78151	5.08668	8.90138	12.1973	14.364	21.2915	29.2261	33.4375	43.4168		42.5	-0.15013	1.76638	3.69509	3.64626	5.14772	10.1648	12.887	20.3699	25.0818	46.6882	40.7068	54.9768	72.4573	68.3923		42.85	-0.30832
41.5	2.08912	2.42481	3.95069	5.62916	7.15504	6.78882	12.8008	19.6978	35.2922	62.4834	71.0588	93.5198	125.441	151.228		42.2	0.6006	0.69215	1.36354	1.18044	3.16408	4.47633	5.26979	8.59621	12.655	14.5471	20.9558	28.9209	33.5291	43.5083		42.55	-0.78499	2.07146	3.7194	3.8903	5.59929	10.4821	12.8625	19.8815	24.8986	47.3717	40.8532	54.757	73.7634	69.5397		42.9	0.02742
41.55	2.45522	2.82143	4.37783	5.04922	7.09389	5.96475	12.7091	20.1859	34.8954	62.2697	72.1879	93.5807	126.326	151.045		42.25	0.53957	0.53957	1.66872	1.24147	2.88942	4.11012	5.94118	8.38258	12.3194	14.9439	20.7117	28.8904	34.0784	43.5083		42.6	-1.13909	2.30329	3.80476	3.78034	5.94099	10.2501	12.6671	19.857	25.1304	46.9932	40.2672	54.2198	75.7652	70.5894		42.95	0.08851
41.6	2.60771	2.97392	4.19462	4.65238	7.24638	5.65946	12.8006	21.1014	34.4375	61.5982	73.0728	93.3059	127.364	150.526		42.3	0.44801	0.44801	1.97389	1.48561	3.04201	4.26271	6.30739	7.98585	12.0447	15.4016	20.7422	28.7683	34.2004	43.1726		42.65	-1.09036	2.42526	2.98679	4.09763	5.70895	10.4453	12.9477	20.4306	25.3134	47.1518	39.5346	53.7803	77.8281	71.2851		43	0.21064
41.65	2.02777	3.91986	4.40814	5.26263	6.88006	5.68988	12.6174	21.6506	34.4374	60.5605	73.5915	92.726	128.676	151.137		42.35	0.17336	0.44801	2.18752	1.57716	3.07252	4.68996	6.64308	8.16896	11.77	16.0425	20.7727	29.0735	34.4141	43.1421		42.7	-1.07825	2.87683	3.13317	4.20739	5.59899	10.6283	13.0453	20.931	25.9359	46.6146	38.8754	53.5604	79.4759	71.7001		43.05	-0.09449
41.7	1.47835	3.52302	4.46907	4.95735	6.97151	6.42219	12.1595	22.1998	34.3763	59.3397	73.0726	93.5194	130.751	153.731		42.4	0.20387	0.44801	2.21803	1.42458	3.28615	5.1172	6.55153	8.10792	11.4649	16.4392	21.0169	28.982	34.3836	42.9285		42.75	-0.79759	2.97439	2.98659	4.36599	5.26931	11.0921	13.3748	21.4558	26.241	47.1394	38.2405	52.9622	80.8186	72.054		43.1	-0.2165
41.75	0.98996	3.70602	4.04172	5.59811	6.81882	6.94089	12.0984	22.1386	34.9255	58.1189	71.8823	94.5263	132.795	155.653		42.45	0.29543	0.75319	1.91286	1.39406	3.28615	5.33083	6.49049	8.26051	11.3428	16.8665	21.0169	29.0735	34.3836	43.1726		42.8	-0.73665	2.80339	3.60905	4.57341	4.79314	10.9577	13.5212	21.4191	27.0465	46.6999	38.1549	52.4982	81.4777	71.7365		43.15	-0.27748
41.8	0.98985	3.30919	4.01109	4.98766	7.64269	7.4901	11.7015	22.047	35.078	57.5694	71.2108	94.3431	133.741	155.897		42.5	0.4175	0.87526	1.88234	1.39406	3.13356	5.08668	6.45998	7.98585	11.0986	16.7749	20.8948	29.4702	34.7803	43.1116		42.85	-0.56585	2.51032	3.57233	4.12165	4.86628	10.5426	13.1548	22.0172	26.7535	46.5777	38.3257	51.7779	80.3546	71.6509		43.2	-0.30795
41.85	1.38648	3.88892	3.37012	5.4148	7.76465	7.73413	11.3657	22.4131	35.3525	58.1187	71.0886	94.0683	133.131	156.05		42.55	0.69215	1.24147	1.72975	1.76027	3.28615	5.14772	6.39894	7.95534	11.3123	16.5918	20.7117	30.1721	35.0549	43.0506		42.9	-0.76126	2.55905	3.81638	4.58542	5.00046	9.9321	13.167	22.2368	27.0464	45.7719	39.0947	51.143	79.0483	70.0273		43.25	-0.18582
41.9	1.75258	3.76674	4.07192	4.95693	7.45937	7.55092	11.6708	23.4811	35.3524	58.1185	70.8749	92.9696	131.757	155.348		42.6	0.6006	1.21095	1.91286	1.72975	3.13356	4.84254	6.39894	7.98585	11.2512	16.3172	20.5286	31.1487	35.7569	42.959		42.95	-0.43177	2.8031	3.30358	4.49987	5.80603	9.46814	13.3866	23.4208	26.4359	45.8329	39.2777	50.2518	77.4857	69.6122		43.3	-0.27732
41.95	1.56937	4.01078	4.52958	5.10941	7.21512	8.16117	11.8538	24.4881	35.3218	57.1114	70.8748	92.4507	129.407	155.134		42.65	0.6006	1.51613	1.6382	1.91286	3.3777	4.90358	6.1548	8.01637	11.3123	16.073	20.6506	31.4844	35.8789	42.5928		43	-0.16331	2.69314	3.92605	4.80495	5.94021	9.19948	13.8626	23.7136	26.3381	45.7351	40.0589	50.9964	77.0828	68.9529		43.35	-0.00261
42	1.69134	3.67498	4.89568	5.01775	7.15398	8.25262	11.7927	25.0678	35.9015	55.6464	71.5461	92.7253	128.034	154.371		42.7	0.26491	1.45509	1.6382	1.85182	3.13356	4.87306	6.21584	8.29103	11.2512	15.9509	20.6201	31.637	36.0315	42.5318		43.05	0.53239	2.65642	3.6696	4.41423	6.4406	9.24821	13.4718	23.86	25.5202	45.0026	39.8757	51.6554	76.3381	68.7819		43.4	-0.12463
42.05	2.3321	3.46125	4.46833	4.34626	7.27595	8.71028	11.9757	25.1898	35.932	54.4561	72.3394	92.9083	126.935	153.791		42.75	0.32594	1.45509	1.48561	1.85182	3.10304	5.1172	5.97169	8.29103	11.0376	15.5237	20.6812	31.2708	36.1231	42.3486		43.1	0.78864	2.38776	3.36433	4.41413	6.23298	9.15046	12.5806	23.4693	25.3248	43.794	40.5836	53.1324	77.1436	67.6343		43.45	0.02801
42.1	2.17941	3.52218	3.70529	4.68185	7.18429	8.16085	11.884	24.976	35.4741	53.6626	73.0717	92.3588	125.531	153.272		42.8	0.23439	1.33302	1.54665	1.54665	2.95045	5.26979	5.94118	8.47414	10.885	15.0354	20.8337	30.6909	36.0315	42.6233		43.15	1.32566	2.53415	2.91257	3.8403	6.02536	9.60202	12.0678	22.9687	24.7876	43.0371	40.8642	53.4985	77.3632	66.9629		43.5	-0.03297
42.15	1.50792	3.49156	3.61363	4.71226	7.67247	8.83214	12.4027	24.8234	35.0162	52.5943	73.4073	91.9315	124.738	153.089		42.85	0.29543	1.24147	1.66872	1.30251	3.16408	5.33083	6.03273	8.44362	10.5188	14.6387	20.8337	30.1721	36.001	43.0506		43.2	0.54431	2.87585	3.52282	4.13317	5.18298	9.96814	11.8602	22.5292	24.3602	42.9515	41.621	53.9257	76.9725	65.7665		43.55	0.05864
42.2	0.56177	3.46094	3.36938	5.90234	7.58081	8.58789	13.074	25.0064	35.1382	51.8008	73.4072	91.5957	124.372	152.844		42.9	0.32594	1.30251	1.8213	1.14992	3.43874	5.4529	6.1548	8.47414	10.5799	14.6082	20.8337	29.5313	35.8179	43.1726		43.25	0.49538	2.74148	3.77907	4.20632	4.81667	10.7371	12.1897	22.5047	24.4822	42.4265	42.2312	53.8523	75.6907	64.7898		43.6	0.11973
42.25	-0.04869	3.09462	3.46083	5.47499	8.03847	9.04555	13.5011	25.3419	35.2602	50.5189	74.5057	91.1683	124.921	153.394		42.95	0.11232	1.1194	2.09596	0.96681	3.53029	5.1172	6.12428	8.44362	10.5493	14.9133	20.4981	29.3482	35.7874	43.3557		43.3	-0.35921	2.88786	3.32732	4.73112	4.73112	10.4196	12.2018	23.4079	24.238	42.1335	42.4631	53.4006	74.4699	63.8742		43.65	-0.06333
42.3	-0.04879	2.81986	3.21659	5.07816	7.73319	8.6182	14.2639	25.5249	35.6262	49.4202	76.001	91.626	126.355	153.485		43	0.23439	1.24147	1.66872	1.24147	3.62184	4.75099	5.81911	8.74879	10.6409	14.8523	20.4675	29.104	35.5432	43.5083		43.35	-0.38372	2.00886	3.55915	4.75544	5.10945	10.566	12.6168	23.2003	24.4332	40.754	42.1822	52.7291	73.2003	62.9097		43.7	-0.18534
42.35	0.4699	2.60613	3.70476	4.86443	7.82463	8.43499	14.6911	25.6774	36.4196	49.6337	76.3061	91.9921	127.728	152.447		43.05	0.20387	1.18044	1.36354	1.27199	3.31667	4.20167	5.72755	9.23707	10.6104	14.8218	20.1013	28.8599	35.2075	44.2407		43.4	-0.85989	2.14304	3.13181	4.21823	6.04929	10.2973	12.4092	22.7119	23.7983	40.8027	41.4008	51.9966	71.9306	62.6655		43.75	-0.61254
42.4	0.53083	2.78913	4.19294	4.74225	7.39728	7.85505	15.2403	25.6163	36.5416	49.6031	75.5125	92.4498	127.698	151.043		43.1	0.47853	1.42458	1.1194	1.54665	3.1946	4.23219	5.60548	9.20656	10.5799	14.7302	19.7656	28.7988	35.116	44.7901		43.45	-0.62806	1.71569	3.4613	3.83972	5.92712	10.5414	13.0804	21.076	23.9081	40.9369	40.9247	52.1918	71.5521	62.9095		43.8	-0.70403
42.45	0.3171	2.88058	4.98629	5.62716	6.5732	7.79391	15.1486	24.6396	36.1752	49.0537	74.9021	93.6093	127.026	149.304		43.15	0.26491	1.57716	1.36354	1.60768	2.79787	4.4153	5.69704	9.26759	10.9461	14.9439	19.552	28.3716	34.7803	44.9732		43.5	-0.40843	2.60671	3.32693	3.52224	5.91482	10.5901	12.9827	20.6121	23.2	42.1087	40.3997	52.4236	71.8694	63.9592		43.85	-0.76502
42.5	0.04234	3.18565	4.46739	5.5355	6.5731	7.97691	15.4842	24.4869	35.6869	48.5958	73.8338	96.3863	126.049	148.175		43.2	0.11232	1.79079	1.51613	1.72975	2.70631	4.62892	5.91066	8.84035	11.1292	15.1575	19.1553	28.0054	34.7803	45.0037		43.55	-0.21321	2.37468	3.05827	4.05925	5.46306	10.5534	13.068	20.2824	23.7858	42.7311	40.3752	52.924	73.505	64.484		43.9	-0.42927
42.55	0.34741	3.33813	5.26074	6.08471	6.48144	7.30542	14.416	23.8154	35.6868	49.4807	72.552	99.438	126.08	148.602		43.25	-0.16234	1.94337	1.69923	2.00441	2.52321	4.56789	5.94118	8.50465	11.2512	15.127	19.2774	27.5171	34.9634	44.9121		43.6	0.39704	2.00837	3.43659	3.68073	5.49958	10.9195	13.2022	20.7706	23.7491	43.1217	40.7657	52.8629	74.4083	64.7403		43.95	0.05907
42.6	0.83558	3.33803	5.10805	5.53529	7.4579	7.73256	14.2023	23.5712	35.7477	50.7623	71.7889	101.36	127.056	148.693		43.3	-0.25389	1.66872	2.00441	1.97389	2.64528	4.20167	6.21584	8.35207	11.1902	15.3101	19.7046	27.1204	35.1465	45.2173		43.65	0.16501	1.54441	3.21677	3.98581	5.30417	10.895	13.1899	20.4775	24.0786	42.9385	41.6079	53.6684	74.2129	65.1064		44	-0.00192
42.65	1.84256	3.70413	5.77933	5.87088	7.54935	7.27469	13.4698	23.3575	36.5716	52.0745	71.3616	103.13	128.033	149.12		43.35	0.02077	1.42458	1.97389	1.97389	3.07252	4.26271	6.30739	8.26051	11.0071	15.2796	20.4065	27.0899	35.5432	45.7056		43.7	0.60437	1.42224	3.48523	3.80261	5.03552	11.6029	13.0555	19.7694	23.6879	43.4511	42.3524	54.7792	72.8456	66.0951		44.05	-0.03238
42.7	1.38469	3.64299	4.77214	5.29094	7.61028	8.19011	13.8359	22.5334	37.5785	52.7152	71.8803	104.015	128.948	149.761		43.4	0.11232	0.78371	2.24855	1.48561	3.01149	4.29323	6.45998	8.65724	10.9155	15.3711	21.0474	26.8762	35.7874	45.9802		43.75	0.04275	2.09353	3.27761	4.08327	5.30398	11.3953	13.0188	19.2078	23.5413	43.5608	42.9016	55.9998	71.7468	67.0349		44.1	-0.49009
42.75	1.53717	3.64289	4.55841	5.53498	7.15241	8.34259	13.439	22.8079	38.1888	52.1048	73.1924	104.595	130.108	149.944		43.45	0.38698	0.53957	2.157	1.27199	3.1946	4.62892	6.79567	8.84035	10.5799	15.3406	21.261	26.9373	36.1536	46.2244		43.8	-0.31136	1.73943	2.88689	4.41277	5.3405	11.9567	13.9465	18.8781	23.236	43.756	43.048	56.5856	70.5016	67.1691		44.15	-0.67314
42.8	1.14034	3.24605	3.55123	5.47384	6.60299	8.43404	13.6831	22.1059	38.2802	50.7619	75.3286	104.32	131.511	148.51		43.5	0.35646	0.47853	2.21803	1.05836	3.10304	4.47633	6.94826	9.08449	10.3967	15.3101	21.8713	26.8762	36.1841	46.1939		43.85	-0.54339	2.34968	3.04548	4.37605	5.48689	11.8834	14.3614	18.8414	23.4556	43.2188	42.8526	56.439	69.7447	67.3765		44.2	-0.76464
42.85	1.53696	3.49009	3.94785	6.45029	6.51133	8.67808	13.5609	21.9837	37.273	49.6632	75.9083	103.222	133.068	147.289		43.55	0.44801	0.69215	2.00441	1.05836	3.10304	4.14064	7.1924	8.99293	10.2136	15.4932	22.2681	26.8457	35.6958	46.3464		43.9	-0.36038	2.09323	2.65476	4.38816	5.03513	12.3105	15.289	18.6704	23.895	42.8891	42.6328	55.9873	69.3174	66.7661		44.25	-0.85614
42.9	0.95702	2.87963	4.16137	6.45019	6.48071	7.854	13.0725	20.946	35.7776	48.9001	75.3894	101.726	134.624	146.678		43.6	0.57008	0.93629	1.79079	1.14992	2.91994	4.0796	7.03981	8.59621	10.0916	15.249	22.5733	27.1204	35.2686	46.4685		43.95	0.23767	2.09314	3.35046	3.71667	5.21814	12.0175	15.057	18.6703	24.8348	41.473	41.7782	55.4867	68.9633	66.827		44.3	-0.82557
42.95	0.80433	3.06263	5.2599	6.87733	6.90785	7.73182	13.3165	21.6173	35.4113	47.8929	74.7789	101.482	135.692	145.854		43.65	0.53957	0.93629	1.72975	1.33302	2.82838	3.95753	6.94826	8.29103	10.3662	15.2796	22.6648	27.0288	34.7498	46.3464		44	0.22536	1.8489	3.33816	3.91189	5.10818	11.6023	14.825	18.7678	25.5916	39.7517	41.0457	55.2058	68.8045	66.4607		44.35	-0.94759
43	0.04129	2.63528	5.32083	5.83963	6.93826	6.35842	12.6756	21.5257	35.3501	47.9234	74.5347	101.177	135.173	145.152		43.7	0.66164	0.99733	1.42458	2.12648	2.88942	4.14064	6.6736	7.77223	10.2136	15.127	22.5122	27.0593	34.7498	46.377		44.05	0.84782	1.507	3.63103	4.20476	5.52312	11.6022	13.946	19.1584	26.6657	37.6642	40.1545	53.631	67.4616	67.4006		44.4	-0.94753
43.05	0.10222	3.00139	5.22917	5.77849	7.42643	6.81608	12.9806	22.4411	35.5636	48.7472	74.6872	100.383	134.532	144.694		43.75	0.47853	0.87526	1.6382	2.40114	2.70631	4.14064	6.45998	7.55861	10.0916	15.1575	22.8479	27.0593	35.177	45.9802		44.1	0.628	1.42146	3.42341	5.04695	5.37654	11.358	13.9947	19.8053	27.4713	36.4923	39.4952	52.8863	65.8624	68.1451		44.45	-0.978
43.1	0.43781	2.81818	5.04596	5.10699	7.27374	6.54132	12.4923	22.5325	35.0752	48.8997	74.5345	99.7115	134.44	143.657		43.8	0.53957	0.87526	1.69923	2.49269	2.73683	4.17116	6.79567	7.65016	10	15.4932	22.8784	27.1814	35.5127	45.492		44.15	0.81101	1.01853	3.3989	4.80271	5.73044	11.1382	13.6406	19.3413	27.8862	35.1616	38.5918	52.105	63.7016	70.0249		44.5	-1.00846
43.15	0.80391	2.84859	5.22896	5.77828	7.39571	7.39571	13.3161	23.3564	35.7465	48.1977	74.9311	99.925	134.349	141.856		43.85	0.6006	1.02785	1.76027	2.27907	2.73683	4.14064	6.82619	7.61964	9.93898	15.3711	22.8174	27.7612	35.9094	45.0647		44.2	0.24939	1.29919	4.11902	4.68054	5.85241	10.6986	13.5795	19.036	27.2513	34.8197	38.1766	52.41	63.3597	72.161		44.55	-0.73375
43.2	1.59726	2.60434	5.80869	5.32041	6.81577	7.30405	12.8277	23.3258	36.0821	47.221	74.9615	100.871	134.044	141.032		43.9	0.66164	0.96681	1.79079	1.94337	2.76735	3.98805	6.94826	7.46706	10.1221	15.0659	22.6648	28.1885	35.8179	44.6985		44.25	0.38357	1.09157	3.63064	4.0823	6.45046	10.5642	13.4207	18.5598	27.2024	34.3802	37.7615	51.9216	63.3963	74.2849		44.6	-0.61162
43.25	1.74975	2.63475	5.77806	6.14428	6.81566	7.24291	12.7361	23.7224	36.2346	46.3664	75.4192	101.542	134.806	140.696		43.95	0.53957	0.99733	1.54665	1.97389	2.95045	4.17116	6.91774	7.00929	10.0305	14.7302	22.3596	28.6768	35.8179	44.8816		44.3	0.35906	1.64079	3.71599	4.28972	6.18181	10.5641	13.3595	18.5353	26.8605	33.8796	37.5661	51.9826	64.2262	75.5788		44.65	-0.58105
43.3	1.84119	2.39051	5.74744	6.05262	6.5409	7.67005	12.797	23.8138	35.441	45.9086	75.4801	101.939	135.417	141.429		44	-0.04027	0.93629	1.54665	1.76027	3.01149	4.32375	6.79567	6.8567	10.1526	14.5166	22.1765	29.1345	35.8179	44.9732		44.35	0.63972	1.4698	3.22761	3.85017	6.31599	10.6373	13.213	18.0714	26.9947	33.4278	37.5172	52.0435	64.1651	75.5787		44.7	-0.76411
43.35	1.29177	2.17678	5.32009	7.05959	7.12063	8.00564	13.2547	23.9968	34.8001	45.939	74.9612	101.908	135.966	141.673		44.05	-0.19286	1.08888	1.66872	1.66872	3.13356	4.65944	6.91774	6.97877	10.3052	14.6692	22.0545	29.043	35.6348	45.2173		44.4	0.09031	2.32419	3.33738	4.00876	5.27829	10.6616	13.0053	18.1933	27.1777	33.6108	38.8476	53.0078	64.0796	75.2978		44.75	-1.09975
43.4	1.41374	2.20719	5.13688	6.81535	7.18156	8.37174	14.048	23.9052	34.0981	45.2065	73.2216	101.664	137.217	142.161		44.1	-0.00975	1.39406	2.03493	1.48561	2.76735	4.75099	6.70412	7.00929	10.2441	14.7302	21.7493	29.0735	35.8484	45.614		44.45	-0.08069	2.1532	3.00769	3.7279	5.13171	9.99011	13.1273	18.6815	27.5926	34.1844	40.1415	54.2528	64.2992	74.1869		44.8	-0.9471
43.45	1.20001	2.5733	4.74005	7.48663	8.1275	7.63922	13.0714	22.9285	33.4876	45.6336	71.7261	101.328	138.529	142.649		44.15	0.38698	1.45509	2.3401	1.57716	2.37062	4.65944	6.61256	7.22292	10.3357	15.0659	21.5662	29.3176	36.2756	45.8276		44.5	-0.41038	2.11648	3.23952	4.2405	4.63113	9.58718	13.7376	19.2674	27.4705	34.2576	41.0813	54.9363	64.7874	73.4544		44.85	-0.76394
43.5	1.44404	3.12251	5.07563	7.33394	8.00532	7.73066	13.3459	22.7758	32.4804	45.8471	70.9021	100.809	140.299	142.801		44.2	0.81422	1.8213	2.49269	2.00441	2.3401	4.90358	6.45998	7.13136	10.2747	15.7678	21.322	29.2261	36.5503	45.7971		44.55	-0.25178	1.56706	3.66667	4.25261	5.20476	9.07439	14.0304	19.4137	27.922	34.4406	41.4963	55.2902	65.3732	71.9406		44.9	-0.67234
43.55	1.53549	3.21396	5.13657	7.05917	8.00522	7.30331	12.9491	22.4095	32.2667	46.7015	70.5662	100.138	142.252	142.832		44.25	0.90578	1.79079	2.6758	2.18752	2.46217	5.30031	6.1548	7.28395	10.4273	15.9509	20.8948	29.3176	36.886	45.5225		44.6	-0.32512	2.04304	3.59333	4.80183	5.19245	9.55036	13.8839	20.1949	28.0074	33.9034	41.252	54.3868	64.8726	70.6832		44.95	-0.61125
43.6	1.74901	3.24437	5.04491	6.14354	7.15062	7.85252	14.0476	23.2944	31.0154	45.7859	70.9934	99.1001	145.151	142.405		44.3	1.14992	1.79079	2.43166	2.3401	2.82838	5.72755	6.00221	7.7112	10.7935	15.9509	20.6812	29.1956	36.9165	45.1563		44.65	0.00437	2.06736	3.98386	4.41111	5.66843	9.4404	14.0303	20.8052	27.6533	34.062	40.8735	53.9472	64.3232	69.7065		45	-0.91637
43.65	1.80994	2.72547	4.19031	5.59412	7.48621	7.12	13.8034	23.2943	30.4659	45.0839	70.2304	98.4896	147.44	142.801		44.35	1.39406	2.06544	2.30959	2.18752	2.88942	6.03273	5.69704	7.92482	10.8545	15.5847	20.3455	29.0735	36.947	45.1868		44.7	0.35827	2.50671	3.75183	4.93591	5.39978	9.55017	13.725	21.7694	26.994	34.5746	40.0799	53.3002	63.3588	70.1825		45.05	-1.06891
43.7	1.16896	2.29812	4.40383	5.47194	6.9673	7.60817	14.5357	23.8435	29.8555	43.7105	69.8335	97.5435	149.088	143.533		44.4	1.27199	1.91286	2.37062	2.03493	2.6758	5.94118	5.54445	8.29103	10.824	15.188	20.3149	29.1651	37.1912	45.2478		44.75	0.79763	2.18923	3.98367	4.65505	5.50954	9.56228	13.5174	21.9402	26.8474	35.6243	40.1897	53.8128	63.4685	71.2078		45.1	-1.37403
43.75	1.19938	2.20646	4.61735	5.7465	6.50944	7.54703	14.1693	23.4772	30.3131	42.6117	69.5282	96.1701	150.278	143.137		44.45	1.05836	1.8213	2.12648	2.00441	2.43166	6.21584	5.66652	8.16896	10.763	15.5237	20.376	29.1956	37.1607	45.0647		44.8	0.99285	2.51872	3.49529	4.45964	5.27751	9.86736	13.1144	21.6105	27.3356	36.381	39.8478	54.8869	63.4928	71.342		45.15	-1.37398
43.8	1.32134	2.90826	5.19707	6.02105	5.44122	7.94366	15.0542	23.6907	30.0384	41.0552	69.3755	94.8272	150.369	141.519		44.5	0.44801	1.42458	1.97389	1.8213	1.85182	6.42946	5.88014	7.95534	10.4273	15.8594	20.3455	29.4702	37.1301	45.2173		44.85	1.29792	2.48201	3.5196	3.87361	5.66804	9.46443	13.4195	20.5606	27.3721	36.3809	40.2139	56.5958	63.8223	72.0621		45.2	-1.06875
43.85	1.96211	2.87763	4.73921	5.86836	5.47163	7.88252	14.9016	23.8127	29.8246	40.5974	70.2299	93.6979	149.545	139.993		44.55	0.35646	1.1194	1.91286	1.57716	1.85182	6.42946	6.12428	7.92482	10.4883	16.1035	20.6506	29.867	37.2522	45.1563		44.9	1.12693	2.54294	2.88474	4.31296	5.46042	9.37888	13.3584	19.8403	27.4575	36.2954	41.0805	57.9018	63.8711	72.5259		45.25	-0.85507
43.9	1.4432	2.93856	5.19686	6.08187	5.7767	7.85189	15.2066	25.1554	29.4889	40.1395	70.5045	93.2095	148.507	138.376		44.6	0.47853	1.33302	1.94337	1.36354	2.30959	6.49049	6.24635	7.86378	10.6714	16.4087	20.6812	30.1721	37.3438	45.0037		44.95	1.078	1.96911	3.40954	4.39831	5.66785	8.78064	13.7245	19.9745	27.6161	35.868	42.6551	58.4511	63.1996	72.6112		45.3	-0.54984
43.95	1.56517	2.63328	5.34935	5.56297	6.35643	7.24144	14.6572	26.6811	30.0991	41.0549	71.664	93.362	148.538	137.399		44.65	0.66164	1.42458	2.27907	1.05836	2.64528	6.12428	5.97169	7.83327	10.7324	16.4697	20.6812	30.5078	37.8015	45.2478		45	0.91921	2.21316	3.38503	4.33718	5.85085	8.73171	13.7	20.2429	28.2996	36.991	44.2664	59.2078	62.5037	70.8655		45.35	-0.45823
44	1.56506	2.90784	5.95959	5.6239	6.96667	6.87512	14.3214	28.2985	31.045	42.0924	71.9081	93.1483	148.294	137.796		44.7	0.99733	1.48561	2.24855	1.36354	2.98097	6.12428	5.88014	7.46706	11.0986	16.5308	20.8643	30.7215	38.0151	45.553		45.05	0.95574	2.1032	3.43376	3.54363	5.7531	8.58513	14.0051	20.6701	28.3361	38.4313	45.3161	59.0612	61.0998	68.7414		45.4	-0.70232
44.05	2.08376	3.36549	5.95949	5.41017	6.78346	6.35622	13.8635	28.2373	31.3806	43.4961	72.3962	92.9956	148.232	138.284		44.75	0.84474	1.36354	2.49269	1.57716	2.95045	6.03273	5.636	7.03981	11.3123	16.4697	20.9558	30.4163	37.9846	45.7056		45.1	0.7115	2.22517	2.94538	3.16511	5.88728	9.15876	14.1026	20.3892	28.9219	39.5177	45.6822	59.3419	60.9044	67.1422		45.45	-0.79382
44.1	2.1752	3.57901	5.89835	5.89835	6.63077	7.08853	14.4128	28.2067	31.5636	43.9232	71.4196	93.5448	148.232	138.253		44.8	0.66164	1.21095	2.30959	1.66872	3.13356	5.94118	5.39186	7.13136	11.5869	16.3172	20.9863	29.867	37.9541	45.553		45.15	1.2363	2.23728	3.11619	2.95749	5.83835	9.46384	14.2734	20.3647	29.5322	39.5053	44.7422	58.8901	60.9287	66.8247		45.5	-0.79377
44.15	1.83941	3.79253	5.56255	6.32549	6.1729	7.48516	14.7789	27.9625	31.7466	44.2588	71.511	93.4837	147.561	137.795		44.85	0.47853	1.21095	1.69923	1.88234	3.3777	6.06325	5.36134	7.49757	11.8311	16.2866	21.322	29.104	37.9236	44.9426		45.2	0.95544	2.28601	2.9574	3.49451	5.92371	9.70788	14.6761	19.8275	30.2157	39.3099	44.1317	58.7313	61.4413	68.3383		45.55	-0.91578
44.2	1.90034	3.27363	4.89106	6.90522	6.99677	7.9123	15.9384	28.1455	33.3334	44.5639	70.5649	94.277	146.859	138.466		44.9	0.23439	0.96681	1.42458	1.60768	3.22511	6.21584	5.39186	7.61964	11.8921	16.3172	21.3526	28.0969	37.9846	44.3628		45.25	1.48025	2.71316	2.9573	3.84841	5.67947	9.62234	14.6638	19.9007	30.5086	39.5052	43.3137	58.658	61.5144	69.5589		45.6	-0.91573
44.25	1.28988	3.243	5.5013	6.69149	6.93563	7.69857	15.9993	27.4434	33.9132	45.1741	70.4732	94.6737	147.866	138.985		44.95	0.29543	0.66164	1.21095	1.30251	2.91994	6.52101	5.75807	8.07741	11.77	16.2256	21.1389	27.6087	38.3814	44.1187		45.3	0.96746	2.7863	2.57878	4.06804	5.92351	9.53679	14.6393	19.9372	29.9958	39.2243	43.3381	58.6091	61.0138	70.7795		45.65	-1.06826
44.3	1.32029	2.35789	5.01292	6.75242	7.33225	8.00364	16.0298	27.4433	33.8215	45.3877	69.466	95.7112	148.964	139.87		45	0.4175	0.72267	1.27199	1.02785	2.61476	6.52101	6.18532	8.22999	11.4343	16.4087	20.8337	27.3035	38.5034	43.783		45.35	0.91853	2.41999	2.54206	3.84822	5.66707	9.70759	13.7481	20.0591	29.4219	39.4561	42.9473	59.4146	60.44	71.9146		45.7	-0.97666
44.35	0.98449	2.32727	5.01281	6.41662	6.78283	8.52233	15.2972	26.5887	32.2345	44.9908	69.7101	96.5655	150.154	140.419		45.05	0.29543	0.81422	1.60768	0.87526	2.49269	5.97169	6.18532	8.19948	10.9461	16.4697	20.4675	27.0593	38.3508	43.5694		45.4	0.24705	1.80955	2.26121	3.35984	5.66697	9.82957	13.1743	20.2544	28.4575	39.3584	42.6054	60.2934	59.207	73.6479		45.75	-0.94609
44.4	0.89284	2.29664	4.76857	6.5691	6.78273	9.28517	16.0601	27.1074	31.7766	45.1433	69.5879	97.2673	151.65	139.076		45.1	0.35646	0.90578	1.8213	1.27199	2.64528	5.69704	6.21584	8.26051	10.6714	16.4392	20.7117	26.9067	38.4119	43.6304		45.45	0.17371	1.95593	2.68835	3.56726	5.48376	10.2079	11.9169	20.1444	27.847	40.1029	43.6185	61.9291	58.6698	74.8319		45.8	-1.00707
44.45	1.22842	2.47964	5.28726	6.35538	6.26382	9.25455	16.2126	27.1073	30.6474	45.2043	71.1442	97.4198	150.887	136.055		45.15	0.35646	1.21095	1.94337	1.69923	2.49269	5.636	6.24635	8.29103	10.4273	16.4087	21.1389	26.7847	38.2288	43.6304		45.5	0.25906	1.78494	2.82253	3.90896	5.97195	10.0857	11.3308	20.4129	27.4929	41.0672	44.5217	63.406	58.3889	74.9661		45.85	-0.76287
44.5	1.10625	2.99834	4.79887	6.35527	6.20268	9.43755	16.7007	27.565	30.8609	46.2112	72.3953	97.969	150.49	133.675		45.2	0.38698	1.36354	2.03493	2.03493	2.43166	5.48341	6.12428	8.68776	10.1831	16.073	21.4746	26.7542	37.71	43.905		45.55	0.86931	2.21208	3.43279	4.64128	5.95964	10.049	11.7092	20.0588	27.1144	42.007	45.5959	65.2126	58.6452	75.9303		45.9	-0.70178
44.55	1.44184	3.24237	4.21894	6.11103	6.11103	9.74262	15.7241	26.924	30.5251	46.3637	73.2192	97.9079	149.269	133.247		45.25	0.6006	1.6382	1.88234	2.37062	2.55373	5.54445	6.03273	9.08449	10.3967	15.6763	21.7798	27.334	37.1912	44.2102		45.6	1.12556	1.78474	3.49373	4.50691	5.82527	9.38972	12.1241	19.7657	27.1876	42.9346	45.9254	66.6529	58.3399	77.0289		45.95	-0.79328
44.6	1.13656	3.48641	4.09676	5.86678	6.72127	9.40682	15.3577	26.6798	32.1119	47.096	72.273	97.6942	149.574	133.034		45.3	0.50905	1.48561	1.85182	2.37062	2.30959	5.42238	5.69704	9.14552	10.6409	15.4932	21.9629	28.0054	36.6724	44.3323		45.65	1.3574	1.84568	3.72556	4.60447	5.27585	9.57273	12.417	19.0698	27.041	43.435	46.0962	67.2021	56.5576	78.1518		46	-0.85427
44.65	1.38059	3.3032	3.76096	5.89719	6.93479	9.68137	14.6557	26.0083	32.8747	47.1875	70.9912	96.5344	150.154	133.461		45.35	0.57008	1.24147	1.79079	2.18752	2.09596	5.08668	5.30031	8.87086	10.763	15.4016	21.7798	28.6157	36.1841	44.3323		45.7	0.95447	1.46716	3.33484	4.17712	4.86072	9.76794	12.3803	19.619	26.9066	44.0331	45.9984	67.2631	54.7631	77.871		46.05	-1.03732
44.7	1.19738	3.21154	4.46276	5.34777	6.81261	9.46764	14.7472	25.6114	34.4005	48.4996	70.0145	96.5953	150.123	134.468		45.4	0.69215	1.39406	1.76027	2.12648	2.09596	4.68996	5.39186	8.26051	11.0071	15.5847	21.7798	29.1651	35.8484	44.4238		45.75	0.18533	1.99197	3.98171	4.20144	4.62869	10.4881	13.0271	20.4856	26.4182	43.6912	45.1927	66.616	53.1028	77.1507		46.1	-1.22037
44.75	1.50245	2.78419	4.24903	5.37818	6.50733	9.80323	14.7166	24.8484	34.0037	49.5371	69.4651	96.0459	149.757	135.749		45.45	0.44801	1.48561	1.91286	1.72975	1.97389	4.26271	5.57497	7.22292	11.0071	15.7983	21.8103	29.1651	35.8179	44.2407		45.8	0.42937	2.33367	4.1281	3.81072	3.98162	10.7809	12.8317	20.4123	26.4548	43.447	44.4479	66.1642	53.7863	77.6755		46.15	-1.1898
44.8	2.47891	2.32632	4.73721	5.13394	6.1105	9.10122	14.5639	24.36	33.9731	51.3986	69.7702	96.6867	149.299	138.13		45.5	0.29543	1.54665	1.72975	1.57716	2.157	4.29323	5.636	6.64308	10.7935	15.6763	21.6577	28.7683	35.6653	44.3018		45.85	0.75886	2.93171	4.66511	3.65193	4.31111	10.378	13.0758	20.2169	26.3082	42.9952	43.691	65.0045	55.4586	78.1514		46.2	-1.15923
44.85	2.26518	2.63139	4.52348	5.5916	6.23246	9.86406	15.1131	24.0547	33.6678	51.3985	69.2818	96.1067	149.177	139.686		45.55	0.26491	1.6382	1.60768	1.85182	2.21803	4.53737	5.75807	6.45998	10.5799	15.4321	21.9629	28.3411	35.9094	44.5459		45.9	1.3325	3.31003	4.43308	3.84714	4.51853	10.3291	13.3076	19.5576	26.4546	42.8486	43.581	63.7471	57.8999	79.1767		46.25	-1.09814
44.9	2.32611	2.90594	4.82855	5.7746	5.7746	9.98602	14.7468	23.9631	34.0339	51.5204	69.6174	96.6559	148.353	141.364		45.6	0.44801	1.57716	1.69923	1.91286	2.21803	4.62892	5.69704	6.36842	10.4273	15.5542	22.1765	28.0664	36.2451	44.4849		45.95	0.79529	2.99255	4.34753	3.85925	5.16541	9.88953	13.3441	19.4354	26.9061	41.9452	43.5321	62.6483	60.9393	79.7259		46.3	-0.85394
44.95	1.71565	3.1805	5.1031	6.11018	6.20174	10.3521	15.0518	24.4513	33.7286	50.6964	70.5938	96.2591	147.346	141.761		45.65	0.84474	1.60768	1.69923	1.85182	2.49269	4.65944	5.54445	6.73463	10.2136	15.5542	22.085	27.9138	36.7944	44.3628		46	0.62429	2.74832	3.68826	3.89578	5.05544	9.90164	13.5149	18.6663	27.3211	40.0774	43.5442	61.2566	62.4529	80.3484		46.35	-0.85389
45	2.29538	2.78366	5.04196	5.89646	6.07956	10.0468	14.2278	24.4206	33.5454	50.4216	73.2182	96.9304	145.209	142.218		45.7	0.93629	1.48561	1.72975	1.30251	2.73683	4.84254	5.4529	7.3755	10.1221	15.5237	22.1155	28.0969	37.2827	44.2102		46.05	0.38005	2.10125	3.5783	3.63933	4.75017	9.59636	13.1364	18.5929	27.9557	38.5514	43.6418	60.6706	63.5881	81.5934		46.4	-0.70125
45.05	2.41735	2.69201	5.34703	5.34703	6.75084	9.13121	14.2582	24.6341	32.8128	49.4449	75.0492	96.7472	143.531	143.378		45.75	0.66164	1.08888	1.69923	0.90578	2.79787	4.87306	5.33083	7.86378	9.90846	15.5237	22.2986	28.4021	37.4963	43.844		46.1	0.42878	2.28425	3.28523	4.21296	4.48152	9.71834	13.4171	18.251	27.6383	36.8179	42.8116	60.1578	64.8087	83.0948		46.45	-0.64016
45.1	2.20362	2.99708	4.58399	5.56055	6.41504	8.33765	13.5256	24.3594	32.3855	49.1702	76.8801	96.4724	142.523	144.873		45.8	0.44801	0.93629	1.79079	0.99733	2.8589	4.99513	5.08668	8.07741	9.75587	15.7373	22.4207	28.3411	37.3743	43.3252		46.15	0.40427	2.24753	3.45603	4.32273	4.42039	9.68162	13.3071	17.5674	27.3696	36.0488	41.8227	60.3652	66.6762	85.8169		46.5	-0.82321
45.15	2.3561	2.93594	4.30923	5.40786	6.50649	7.84927	13.6171	24.7865	32.0192	48.6208	76.9716	96.1061	141.089	145.484		45.85	0.14284	0.93629	2.06544	1.42458	2.73683	5.1172	5.20876	8.13844	10	15.8289	22.4512	28.4631	37.4658	43.1116		46.2	0.51404	2.74793	3.08972	4.90857	4.83533	9.59607	13.246	17.4696	27.2108	35.2675	40.8949	61.3173	68.2631	89.0272		46.55	-1.0673
45.2	1.68461	3.0579	4.18705	5.77397	6.53691	8.55107	13.2813	24.6033	31.7444	48.7122	77.6428	95.1599	141.119	144.751		45.9	0.05128	0.81422	2.43166	1.72975	2.61476	5.08668	5.23927	8.07741	10.1831	15.9509	22.4817	28.7073	37.8015	42.9895		46.25	0.53836	2.83328	3.28494	4.9573	5.06716	10.3528	13.0872	17.677	27.5281	34.6692	39.8938	62.5012	69.2151	90.4676		46.6	-1.28087
45.25	1.92865	2.23382	4.52264	5.56024	7.17767	8.82562	13.3117	24.6337	31.8359	47.5829	77.7648	95.7702	140.723	143.774		45.95	0.35646	1.08888	2.27907	2.03493	2.91994	5.20876	5.30031	8.26051	10.3052	15.8594	22.2376	28.8904	38.1372	42.9895		46.3	0.80681	3.01628	2.79656	4.6032	5.54314	10.548	12.55	18.2995	28.5168	35.0475	39.7717	64.0636	70.216	90.2721		46.65	-1.49444
45.3	2.17268	1.98958	4.64461	5.25496	7.78792	9.4969	14.1966	24.6336	31.8663	47.003	79.6263	96.0753	141.607	143.927		46	0.69215	1.45509	2.157	2.157	3.13356	5.14772	5.4529	8.19948	10.3967	15.2796	21.7493	29.0735	38.7171	43.5388		46.35	1.18513	3.10164	2.97957	4.61531	5.18904	10.2183	12.5499	18.5801	28.9439	35.7432	39.9181	65.7237	71.6563	88.441		46.7	-1.49439
45.35	1.89792	2.87448	4.58347	5.10226	7.54367	8.79489	14.8069	24.7251	32.446	45.7822	80.6333	97.4179	141.272	145.117		46.05	0.99733	1.48561	1.97389	2.157	3.43874	4.72047	5.39186	7.77223	10.3662	14.9744	21.2915	29.2566	38.8086	44.3018		46.4	1.06296	2.74754	2.64988	4.11472	5.04246	9.11961	12.7207	18.7509	29.6396	36.8051	40.7602	66.7856	72.9502	87.1103		46.75	-1.21967
45.4	1.74522	3.54576	4.88854	5.22423	7.39098	7.90978	15.4781	24.6944	32.1407	45.3548	82.4947	97.2957	142.797	146.307		46.1	1.42458	1.45509	1.60768	2.43166	3.62184	4.32375	5.33083	7.74171	9.93898	14.9439	21.2	29.4092	38.2898	44.6375		46.45	1.07507	2.55212	2.8573	4.2367	4.7616	9.42468	12.9403	19.1903	29.6639	37.0492	40.8578	67.1273	74.1708	85.2792		46.8	-1.09755
45.45	1.04322	4.09497	4.82739	5.77344	6.99414	6.68897	15.417	24.1755	32.0185	45.019	82.9524	97.4788	143.286	145.147		46.15	1.45509	1.42458	1.72975	2.43166	3.59132	4.0796	5.4529	7.98585	9.6338	15.1575	21.3526	29.4092	37.4048	44.668		46.5	0.96511	1.81961	3.16238	3.80935	5.1033	9.42459	12.867	19.2268	28.8582	36.1946	40.2595	67.5911	74.7078	82.74		46.85	-1.00594
45.5	0.95156	3.20986	4.76625	5.37661	6.68886	6.32265	16.0578	23.504	30.9503	45.3241	83.2575	95.9833	143.408	143.591		46.2	1.21095	1.1194	1.88234	2.24855	3.43874	3.86598	5.39186	8.07741	9.51173	15.4016	21.7188	29.5923	36.825	44.5154		46.55	1.08709	2.30779	3.60173	3.99236	5.93328	9.22918	12.1711	19.2878	27.6008	34.6442	40.1618	67.6642	74.1584	80.5915		46.9	-0.91434
45.55	1.53129	2.84354	4.70511	5.46805	5.98685	6.47513	16.1187	22.2527	31.0418	44.6221	82.5249	94.3658	142.248	140.997		46.25	1.1194	0.99733	1.8213	2.27907	3.07252	3.65236	5.08668	8.07741	9.35915	15.5542	21.8408	29.7144	36.7029	44.1492		46.6	1.00154	2.82039	3.77254	4.01668	6.27498	9.37556	11.8292	19.2144	25.8306	33.0816	39.6734	66.9928	72.5469	78.1744		46.95	-0.88377
45.6	2.17205	3.3012	4.46087	5.49847	6.23089	6.32244	16.5458	22.4662	31.0417	44.2863	83.4098	91.1003	142.126	140.691		46.3	1.08888	1.21095	1.76027	2.37062	2.49269	3.65236	4.87306	7.86378	9.4507	15.4627	21.4746	29.7449	36.7029	43.905		46.65	1.03806	3.29636	3.68699	4.12644	6.60447	9.61961	11.8901	18.8115	25.0249	32.813	39.7954	66.4922	71.2773	75.855		47	-0.70061
45.65	2.75178	3.33161	4.7049	5.43733	7.02424	6.9632	17.1561	22.8018	31.4383	44.1946	84.8746	87.9569	143.194	141.149		46.35	1.1194	1.33302	1.8213	2.46217	2.157	3.65236	4.65944	7.74171	9.81691	15.5847	21.3831	29.7144	37.0081	43.9356		46.7	1.2699	2.88123	3.50379	4.17517	6.42127	10.3641	12.6102	18.5673	24.5609	32.9716	39.3192	66.3212	71.6434	74.2924		47.05	-0.45641
45.7	2.38546	3.60617	4.7048	5.37619	7.08517	6.62741	18.163	23.5341	32.1401	43.6757	85.5764	85.5153	144.475	143.804		46.4	1.14992	1.57716	1.76027	2.64528	2.43166	3.92702	4.53737	8.01637	10.2136	15.9509	21.5357	29.7144	37.2827	43.905		46.75	0.76931	2.29519	2.97879	3.94314	6.51882	10.718	13.3303	17.7127	24.9392	33.0813	38.3548	65.0027	72.7298	73.7063		47.1	-0.42584
45.75	1.4088	3.02623	4.79625	4.82676	7.42076	6.90196	19.6583	23.9613	32.8114	43.2789	85.7594	85.2711	145.971	144.75		46.45	0.99733	1.54665	1.97389	2.73683	2.52321	4.29323	4.78151	8.35207	10.4883	16.2866	21.4441	29.5923	37.4658	43.844		46.8	0.94011	2.23406	3.18621	3.91863	6.36004	11.0231	13.0739	17.2975	25.7814	32.9836	37.8542	64.0993	74.8537	73.9015		47.15	-0.57838
45.8	1.56128	2.8125	4.46045	4.97925	7.26807	6.59668	19.4751	24.2053	33.6352	42.1191	85.1184	85.3625	147.496	144.994		46.5	0.78371	1.33302	2.12648	2.46217	2.46217	4.4153	5.14772	8.4131	11.0071	16.5003	21.261	29.5618	37.4353	43.8135		46.85	0.85457	2.01424	2.90535	3.71101	5.81062	11.2672	12.9639	16.6138	26.2574	32.8492	37.2681	63.7208	76.5992	73.8404		47.2	-0.51729
45.85	1.31703	2.65981	3.45326	4.94862	7.20692	7.02382	19.2003	24.1442	33.2995	41.4476	84.8131	86.1864	148.961	144.994		46.55	0.69215	1.30251	1.91286	2.3401	2.43166	4.53737	5.33083	8.16896	11.3733	16.5918	21.0474	29.5008	37.4658	43.8135		46.9	0.92771	2.60008	3.11277	4.26023	5.33445	11.3647	12.5	16.2842	27.2949	33.2275	36.8774	62.9883	76.6113	74.0234		47.25	-0.70034
45.9	1.46952	2.69022	3.48368	4.7349	7.11527	7.87821	18.01	23.4727	32.75	39.7386	84.2332	86.6136	149.114	145.573		46.6	0.44801	1.42458	1.85182	2.3401	2.55373	4.62892	5.4529	7.77223	11.3428	16.3782	20.8337	29.1956	37.4963	43.6914		46.95	0.9032	2.52674	2.6366	4.61414	4.82166	11.4623	12.4755	16.6625	27.722	33.4838	37.3412	62.8173	75.7201	75.0731		47.3	-1.09701
45.95	1.53045	3.14788	3.91082	4.70427	6.96257	8.45794	17.6742	23.1064	31.3156	39.1891	84.6298	87.2543	147.862	146.703		46.65	0.05128	1.45509	1.79079	2.24855	2.82838	4.44582	5.57497	7.25343	11.2512	15.7373	20.5286	28.7378	37.4353	43.6304		47	0.86648	2.94168	3.05154	4.49197	5.17556	10.742	12.7073	16.638	27.6365	33.3494	38.3299	62.2801	74.365	76.1228		47.35	-1.03593
46	1.62189	3.08674	4.39899	4.00226	6.90143	9.34284	17.369	22.9537	30.4915	38.6702	84.233	86.7659	144.932	146.489		46.7	-0.04027	1.39406	1.76027	2.18752	3.1946	4.14064	5.4529	6.88722	11.1292	15.3711	20.5896	28.4631	37.6489	43.4778		47.05	0.91521	2.92937	3.1491	4.45525	5.38299	10.4611	12.2189	16.8454	27.2702	33.801	39.0012	62.4387	74.2062	75.8298		47.4	-0.97484
46.05	2.01852	2.90353	4.82613	4.33785	6.10787	8.7629	17.2773	22.3127	30.0642	39.2805	84.1718	86.2165	142.399	146.58		46.75	-0.1013	1.57716	1.6382	2.24855	3.40822	4.17116	5.60548	6.88722	11.0681	15.1575	20.7117	28.158	37.9541	43.1421		47.1	0.86629	2.86824	3.22224	4.51619	4.95564	10.3389	11.9747	16.5767	26.4522	33.9351	39.0133	63.232	74.9141	74.2916		47.45	-0.97478
46.1	1.80479	2.84239	4.33775	4.33775	5.80259	8.85435	17.3077	22.099	29.7284	39.7687	83.0731	85.0567	140.995	145.634		46.8	-0.22337	1.8213	1.94337	2.21803	3.31667	4.20167	5.81911	7.16188	11.0071	14.9133	20.7727	27.9444	37.9541	42.8369		47.15	1.36668	2.84373	3.52732	4.84568	5.0532	10.0215	11.4253	16.1494	25.9883	34.4355	39.2207	63.7202	75.4267	72.2041		47.5	-1.00525
46.15	1.59106	2.62866	4.55127	4.76489	5.46679	8.51855	17.0329	21.2749	30.0029	40.9892	82.1575	84.1716	140.232	145.451		46.85	-0.04027	2.00441	2.21803	1.88234	3.34718	3.98805	5.88014	7.28395	11.2207	15.0354	21.0779	28.0664	37.5574	42.5928		47.2	1.12244	2.73377	3.53943	4.78455	5.21179	10.3754	10.8881	16.369	24.9017	35.1679	40.2704	64.3304	75.3168	70.6781		47.55	-1.00519
46.2	1.86561	2.78114	4.21547	5.34462	5.74135	8.73207	17.8263	21.2138	29.2704	42.4845	81.4554	83.5306	140.965	144.047		46.9	0.17336	2.21803	2.27907	1.66872	3.13356	4.11012	5.88014	7.3755	11.0681	15.1575	21.4746	28.3716	37.1301	42.3792		47.25	1.0491	3.05105	3.84451	4.68679	5.55349	9.93582	10.7171	16.5276	24.0227	35.6438	40.2825	64.4158	74.3157	69.0545		47.6	-1.31032
46.25	1.71292	3.51346	4.42898	5.28348	6.44314	9.00662	17.9788	21.3662	29.2093	43.3999	81.4248	83.5611	141.056	143.955		46.95	0.23439	2.30959	2.40114	1.42458	3.01149	4.11012	5.84962	7.1924	10.9766	15.249	21.5662	28.4631	36.825	42.1045		47.3	1.06121	2.86785	3.56365	4.41814	5.50457	9.7282	10.5461	17.0646	24.0715	35.717	40.1603	64.196	72.57	67.8093		47.65	-1.27974
46.3	1.62126	3.57439	5.06975	5.80217	6.50408	8.36565	18.3754	22.2817	29.2702	44.1322	81.2416	83.4084	140.018	143.436		47	0.63112	2.09596	2.27907	1.36354	2.95045	3.98805	5.88014	6.82619	11.1597	15.1575	21.5357	28.4631	36.8555	42.3486		47.35	0.65828	3.17293	3.45369	3.66121	5.3824	9.81355	11.2662	17.0401	24.1812	34.8258	39.9161	64.4522	71.0196	67.3697		47.7	-1.03555
46.35	1.77375	3.78791	5.10016	5.31378	7.0838	8.94538	18.0396	23.5938	29.7278	43.3692	79.8377	82.6148	136.661	144.016		47.05	1.08888	1.94337	2.03493	1.42458	2.79787	4.17116	5.81911	6.76515	11.6174	15.0965	21.9934	28.5547	37.0691	42.7759		47.4	0.79246	3.11179	3.77097	3.34373	5.56541	9.66697	12.0107	16.7715	24.6938	33.666	39.5254	64.5742	69.8721	66.8325		47.75	-0.94394
46.4	1.62105	3.63521	5.10006	4.97799	7.20577	8.36544	16.9714	24.2651	30.3381	43.5217	79.2272	82.9199	134.464	144.504		47.1	1.21095	1.79079	1.6382	1.6382	2.46217	4.47633	5.91066	7.07033	12.0142	14.9744	22.9395	28.7073	36.886	43.02		47.45	0.41394	2.37928	3.53894	3.83191	5.44324	9.94763	12.3158	17.8456	25.4261	32.8846	39.5497	64.1469	69.4081	67.2596		47.8	-0.85234
46.45	1.49888	3.84873	4.52012	4.88633	7.75498	8.27378	16.4525	25.3026	30.7042	43.0028	78.159	83.0724	133.121	145.115		47.15	1.30251	1.36354	1.48561	1.91286	2.18752	4.4153	5.75807	7.25343	11.9226	15.0354	23.794	28.3716	36.5198	43.0811		47.5	0.54812	2.19607	3.25808	4.66189	6.15115	9.72781	12.5843	18.9075	25.6092	32.1765	39.6106	63.8904	70.7019	68.6512		47.85	-0.94384
46.5	1.34618	4.36742	4.00121	4.6726	7.6328	8.24316	15.9031	25.6992	31.5891	42.8501	78.22	83.53	133.945	145.206		47.2	1.18044	1.36354	1.14992	2.52321	2.06544	4.4153	5.4529	7.16188	11.5564	15.3406	24.4043	28.0969	36.3672	43.2336		47.55	0.31609	1.93963	3.34344	5.08904	6.10222	9.93523	12.7306	18.6266	25.8044	31.7248	39.7448	63.7438	71.9592	69.884		47.9	-1.18792
46.55	1.01039	3.84852	3.87904	5.25233	6.74769	8.1515	16.3912	25.8517	31.9552	42.1176	77.1822	82.767	134.922	145.603		47.25	0.87526	1.24147	1.21095	2.6758	1.94337	4.53737	5.33083	7.22292	10.9766	15.6763	24.679	28.4021	36.4588	43.2642		47.6	0.21834	2.30574	3.39217	4.74715	5.6993	9.84969	13.2432	18.1993	25.2061	31.4317	40.1109	63.6827	73.2042	70.8116		47.95	-1.18787
46.6	1.68167	3.69583	3.90945	4.94705	6.71707	8.70071	16.1165	25.8516	31.3753	42.0564	76.053	82.0344	136.264	146.793		47.3	0.87526	1.30251	1.08888	2.43166	2.157	4.35426	5.51393	7.22292	10.6714	15.8594	24.5874	28.8904	36.5198	43.4168		47.65	0.30369	2.43992	3.7949	4.58836	5.83347	9.55662	13.2553	17.186	24.3515	31.2607	39.5859	63.9023	74.5713	71.666		48	-1.12678
46.65	1.9257	2.84123	4.12297	4.76384	6.07609	8.67009	15.7196	25.6073	30.1239	43.1855	74.8322	81.1188	136.966	148.654		47.35	0.57008	1.39406	0.96681	2.21803	2.49269	4.20167	5.66652	7.13136	10.5799	15.9815	24.4959	29.1956	36.947	43.5999		47.7	-0.08703	2.46424	4.17322	3.85584	6.0409	9.8617	12.6571	17.0516	24.2904	31.1874	38.6947	64.4759	75.3646	71.5194		48.05	-0.82155
46.7	2.1087	2.41388	4.39752	4.82477	5.95392	8.48688	15.1092	25.8209	29.0557	43.5516	75.2899	81.607	137.271	150.394		47.4	0.6006	1.24147	1.14992	1.85182	2.8589	4.01857	5.69704	7.22292	10.7324	16.4087	24.4959	29.1345	37.1912	43.3862		47.75	0.15701	2.69607	4.28299	3.48953	6.61453	9.88601	12.5349	16.9661	24.4734	31.2727	38.6946	65.2571	75.9749	71.1287		48.1	-0.60788
46.75	2.32222	2.71895	4.12276	5.22139	5.46553	8.3647	14.4072	25.0578	29.3608	44.3144	77.2429	83.1633	136.416	150.973		47.45	0.4175	1.18044	1.21095	1.88234	3.43874	3.86598	5.636	7.31447	10.9461	16.836	23.9771	28.7683	37.0386	43.7525		47.8	-0.2093	2.42742	4.46599	3.97771	6.34588	10.0446	12.3151	16.5754	24.7785	30.882	39.0119	65.318	76.0969	70.5671		48.15	-0.63834
46.8	1.58969	3.11557	4.33628	5.40439	5.37387	8.60874	14.7733	24.9967	29.2996	44.2838	79.0433	84.3534	134.402	151.248		47.5	0.32594	0.90578	1.51613	1.76027	3.3777	4.0796	5.4529	7.16188	11.1292	17.2937	23.5193	28.7073	36.9776	44.3018		47.85	-0.27043	2.25642	3.85555	3.9532	5.54012	9.88582	12.3883	17.149	24.3267	30.6378	39.6221	65.2325	74.4244	70.1153		48.2	-0.85191
46.85	0.97924	2.9934	4.64135	5.28222	5.7705	8.91381	15.0173	25.2407	29.7268	44.9551	81.2099	86.1233	131.686	151.37		47.55	0.35646	1.30251	1.39406	1.66872	3.07252	4.35426	5.69704	7.22292	10.9766	17.5073	22.909	28.6768	36.7029	45.0647		47.9	0.08348	1.96336	3.57469	4.18504	5.18601	10.0688	12.9497	17.8691	23.7651	30.1128	40.3789	65.501	71.3725	70.3471		48.25	-1.03496
46.9	1.00965	3.51209	4.54969	4.97693	5.73987	8.9137	15.6276	25.4847	29.9708	45.1991	81.9117	87.3133	128.665	151.614		47.6	0.44801	1.60768	1.42458	1.66872	2.58424	4.65944	5.60548	7.25343	10.7935	17.2937	22.6038	28.5547	36.7639	45.7361		47.95	0.16883	1.90223	3.61121	3.5868	5.6742	10.2396	13.4012	18.3573	24.0336	29.5511	40.7206	65.7084	68.1864	71.1405		48.3	-0.97387
46.95	1.19265	3.42043	4.70217	5.12942	5.67873	9.00515	16.3294	26.2781	30.52	45.5957	82.7051	88.8086	127.657	150.698		47.65	0.69215	1.97389	1.27199	1.48561	2.43166	4.81203	5.66652	6.97877	10.6409	17.4158	22.5122	28.6768	36.5808	46.3464		48	0.66922	2.50027	3.37918	3.20828	6.41873	10.1663	14.0237	18.1863	24.5096	29.4534	41.2454	65.3909	66.0623	71.2747		48.35	-0.69916
47	1.31462	2.59635	4.21378	4.91569	5.77018	8.97453	16.6955	26.3085	31.3744	46.0534	83.2238	88.9	127.718	150.485		47.7	0.78371	1.88234	1.60768	1.66872	2.58424	4.81203	5.636	6.6736	10.3052	17.3242	22.2986	28.4631	36.2146	47.0178		48.05	0.68133	2.47576	3.35467	3.54998	6.5407	9.38494	13.9015	17.9299	24.4484	29.4411	41.0988	64.9635	66.172	70.176		48.4	-0.48548
47.05	2.10797	2.5047	3.93902	4.33575	6.19732	8.97442	17.2447	26.5831	31.4354	45.9007	83.4983	89.2662	129.732	149.966		47.75	0.99733	1.85182	1.85182	1.57716	2.64528	4.9341	5.91066	6.55153	10.4273	17.3853	22.2681	28.4326	35.8789	46.9263		48.1	0.60799	2.25594	3.59871	4.25789	5.89363	8.66463	13.6085	18.0763	24.0821	29.2945	40.6471	64.0235	67.1119	68.9674		48.45	-0.39388
47.1	2.04683	2.41304	4.18306	4.36616	7.02119	9.21846	17.2751	26.1252	32.1982	46.4194	83.1625	89.6323	131.594	150.698		47.8	1.14992	1.57716	2.18752	1.85182	2.88942	4.9341	6.33791	7.07033	10.5188	17.2327	21.8408	27.9444	35.6348	46.6211		48.15	0.74217	2.37791	3.61082	4.59959	5.64939	8.00535	13.5473	18.2104	23.6548	29.3555	40.9277	63.1567	67.8686	68.3813		48.5	-0.60745
47.15	2.07724	2.96225	4.21347	4.0914	7.20419	8.69955	16.8783	25.4842	32.8084	47.3348	82.2164	90.7308	132.57	151.98		47.85	1.14992	1.57716	2.12648	1.72975	2.73683	4.99513	6.39894	7.13136	10.9155	17.2022	21.7798	27.6392	35.6653	45.7666		48.2	0.59558	2.30457	3.61072	4.2699	5.34412	8.15174	13.3397	17.5023	22.9222	29.2333	41.1351	63.7304	68.0394	68.8939		48.55	-0.60739
47.2	2.07713	3.32835	4.51854	4.85423	7.14305	8.15013	16.9392	25.2705	33.907	48.1587	82.2773	93.2942	133.944	153.475		47.9	1.18044	1.39406	2.06544	1.88234	2.70631	5.02565	6.55153	7.16188	10.9766	17.2022	21.4746	27.3035	35.5737	45.1563		48.25	0.4368	2.26785	3.68387	3.46414	5.20974	8.96951	12.9734	16.7576	22.8855	29.5628	41.0618	65.0486	66.8186	69.2112		48.6	-0.66838
47.25	1.89392	3.11463	5.34241	5.55603	7.44812	8.39417	16.817	24.7516	34.6698	47.8839	80.7513	95.8575	135.103	153.81		47.95	1.08888	1.51613	1.72975	1.6382	2.3401	5.17824	6.42946	6.79567	11.2207	17.2632	21.7188	27.273	35.8484	44.729		48.3	0.21697	2.02361	3.63494	3.26873	5.69793	9.299	13.1442	16.3547	22.7023	30.173	41.0861	65.7199	64.487	69.2477		48.65	-0.51573
47.3	2.07692	2.74831	5.83059	5.8611	6.92922	8.30251	17.1221	24.5989	35.0664	46.5716	80.324	98.5735	136.263	153.169		48	1.21095	1.60768	1.72975	1.54665	2.00441	5.36134	6.6736	6.88722	11.0986	17.6904	21.5662	27.2119	36.3977	44.9732		48.35	0.15584	2.3409	3.94002	3.42732	5.55135	9.66512	13.0831	15.9884	22.9952	30.5391	41.0128	65.5489	62.1309	70.0045		48.7	-0.57672
47.35	2.38199	2.74821	5.76945	6.25773	6.8986	8.91276	16.8168	24.6598	36.3481	46.0526	79.8966	99.4889	136.385	151.857		48.05	0.93629	1.91286	1.69923	1.45509	1.6382	5.48341	6.79567	7.00929	11.0681	18.1482	21.8713	27.4256	37.3438	45.3699		48.4	0.61961	3.23191	4.22068	3.61033	5.89305	9.27439	13.3027	16.208	23.4834	30.7221	40.5976	64.7187	60.1289	70.7856		48.75	-0.45459
47.4	2.80914	2.71758	5.31158	6.34917	7.20367	9.0042	15.7486	24.1104	36.7142	45.961	79.6829	100.16	136.201	149.416		48.1	0.99733	2.00441	1.94337	1.27199	1.42458	5.57497	6.8567	7.3755	10.6104	18.3924	21.9629	27.395	38.1372	45.7361		48.45	0.6073	3.67127	3.86658	4.14734	6.12488	8.88367	13.2782	16.4276	23.1903	31.1371	40.4755	63.559	59.0057	71.8842		48.8	-0.69868
47.45	2.748	3.02265	4.51801	6.4101	7.17304	8.88203	15.3517	23.9882	37.7211	45.7778	79.5913	100.191	134.523	146.608		48.15	0.81422	1.88234	2.03493	1.36354	1.36354	5.36134	6.61256	7.40602	10.2747	18.3313	22.2681	27.5171	38.4119	45.9497		48.5	0.55838	3.78103	3.90311	3.76883	6.05154	8.98123	12.4602	16.2322	22.5066	31.198	40.3777	62.6189	59.2498	73.117		48.85	-0.88173
47.5	2.5953	3.69394	4.30429	6.71517	7.38656	9.00399	14.4666	24.3849	39.0943	45.9303	79.3165	100.099	133.119	142.824		48.2	1.05836	1.72975	1.97389	1.33302	1.33302	5.42238	6.18532	7.31447	9.75587	17.9651	22.0239	27.3645	38.3203	45.7666		48.55	0.54607	3.13396	3.46355	3.51238	6.44207	8.9201	12.2892	16.3786	22.5309	31.7473	40.2311	61.801	59.8112	74.0324		48.9	-1.00375
47.55	1.7407	3.48021	4.18211	6.47093	6.56248	8.17991	14.2529	24.7815	40.1013	45.2283	79.9267	100.16	132.203	140.138		48.25	1.27199	1.48561	1.69923	1.54665	1.79079	5.23927	6.00221	6.94826	9.6338	17.782	21.9629	27.4561	38.1067	45.7056		48.6	0.38728	2.63338	3.13387	3.85408	6.57625	9.12752	12.3502	16.1954	22.5797	32.6016	41.0733	61.5811	60.2384	74.2032		48.95	-1.24783
47.6	1.2218	3.02234	4.15149	5.49426	6.37927	7.66101	14.7411	24.8729	40.62	45.3502	78.7364	99.4274	131.868	138.002		48.3	1.39406	1.6382	1.51613	1.48561	2.06544	5.1172	5.91066	6.79567	9.54225	17.6294	21.7188	27.2119	38.5034	45.3394		48.65	0.88768	3.04832	3.26805	3.65867	6.12449	9.56687	12.5454	15.7436	22.6894	33.2851	42.477	63.0825	61.105	73.9834		49	-1.09519
47.65	1.4048	2.38136	4.94484	5.15846	6.86745	7.32521	15.1988	24.4761	39.7349	45.228	76.6306	98.2676	132.203	136.994		48.35	1.39406	1.6382	1.79079	1.76027	2.6758	4.87306	6.30739	6.82619	9.75587	17.721	21.9324	27.273	38.656	45.4004		48.7	0.76551	3.23133	3.3534	3.92713	5.9657	9.51795	12.9481	15.6703	23.2386	33.5292	43.6854	64.7426	62.5575	73.4828		49.05	-1.15617
47.7	1.4047	2.25919	5.00577	5.00577	6.98941	7.38614	16.0836	24.8422	38.6361	45.9604	74.3112	96.1312	131.837	137.055		48.4	1.02785	2.03493	1.8213	1.85182	2.70631	4.87306	6.42946	7.10084	9.87794	17.2632	22.2681	27.1814	39.2053	45.2783		48.75	0.48465	3.47537	3.36551	4.20779	5.66043	9.51785	13.3509	15.7068	23.5437	33.7	44.4544	65.1087	64.5716	73.3972		49.1	-0.88146
47.75	1.67925	2.44219	4.5479	5.40239	6.25689	7.99639	16.053	26.1849	37.3848	47.2115	72.3274	94.5747	132.172	138.215		48.45	0.96681	2.27907	2.18752	2.06544	2.76735	5.08668	6.61256	7.7112	10.2441	16.9275	22.5427	27.4561	39.1443	45.5225		48.8	0.43572	3.78045	3.59734	4.42742	5.47723	9.51775	12.7282	15.8776	24.5202	33.6388	44.6496	64.1442	66.9518	74.4714		49.15	-0.85089
47.8	2.32001	2.9914	4.09003	6.10419	6.07368	8.39301	15.7172	26.8561	35.7368	47.486	72.3884	93.1403	131.867	140.961		48.5	0.78371	2.37062	2.40114	2.21803	2.76735	5.33083	6.39894	8.16896	10.4273	16.3782	22.5427	27.5781	39.1443	45.6751		48.85	0.33797	3.3409	3.56062	4.62264	5.67244	9.13924	12.5938	16.4513	25.5821	33.5777	44.8082	62.0933	69.2833	76.5587		49.2	-0.7898
47.85	2.50301	3.08285	3.51009	5.92098	5.55477	8.11825	15.6256	27.3748	35.1873	47.8826	73.1817	91.0955	130.951	143.586		48.55	0.87526	2.157	2.6758	2.12648	2.70631	5.48341	6.42946	8.56569	10.5188	16.3477	22.2986	27.6697	38.595	45.8582		48.9	0.35008	3.14549	3.70701	4.62254	5.92869	9.60301	13.1186	16.3657	25.8017	34.3833	44.8447	59.7251	71.1631	77.6084		49.25	-0.94234
47.9	1.92307	2.86912	3.14378	5.98191	5.76829	8.14866	15.656	26.8254	35.1872	47.6689	74.5549	89.1423	129.853	146.79		48.6	0.69215	1.97389	2.70631	2.3401	2.91994	5.23927	6.49049	8.4131	10.5493	16.134	22.0545	27.4256	38.1983	45.6445		48.95	0.09363	3.49939	3.98768	4.14637	6.44129	10.0302	13.6434	16.2313	25.9603	34.8715	44.8324	57.6376	72.6278	76.5463		49.3	-1.06435
47.95	1.95349	3.38781	3.90661	5.67663	5.76818	7.99597	15.9305	26.5201	34.4242	47.8214	75.6229	86.5177	128.235	149.079		48.65	0.69215	1.94337	2.61476	2.27907	2.73683	5.08668	6.45998	8.4131	10.5493	16.1646	21.6272	27.0288	37.6184	45.553		49	-0.04074	3.45047	3.75564	4.07303	6.8074	10.2254	14.3269	16.5852	26.6072	34.9934	44.5027	55.6599	73.6409	75.0569		49.35	-1.03378
48	1.40407	3.47926	4.51686	5.61549	5.40187	7.93483	16.4797	26.6116	33.9663	48.1265	75.3176	84.1677	127.381	151.245		48.7	0.84474	1.66872	2.61476	2.40114	2.88942	4.90358	6.61256	8.10792	10.8545	16.1951	21.322	27.1204	37.3743	45.553		49.05	0.49627	3.08416	3.80438	3.97527	6.7951	10.2497	14.0339	16.402	27.1686	34.7126	43.9899	54.5856	74.007	73.9704		49.4	-1.09476
48.05	1.22085	3.7233	4.30313	5.15762	6.43936	8.02627	16.144	26.1537	32.715	47.6381	74.5851	82.9469	125.519	152.924		48.75	0.90578	1.51613	2.43166	2.24855	2.88942	5.08668	6.61256	8.01637	10.885	16.1035	20.9863	27.2424	37.0691	45.8582		49.1	0.94783	2.4615	3.40145	3.96297	6.63631	10.0665	13.1671	16.1212	27.5592	34.212	43.0743	54.9151	73.6895	73.8848		49.45	-1.00316
48.1	1.58696	3.60112	4.54717	4.85234	7.56841	7.65996	16.0523	25.2991	32.1045	47.8821	73.3338	81.8177	125.366	154.724		48.8	0.96681	1.1194	2.61476	2.30959	3.40822	5.20876	6.70412	7.74171	11.1292	15.7678	20.9863	27.7612	36.3672	46.1633		49.15	0.8867	2.22947	3.20604	4.24363	6.34324	9.88328	12.6177	16.414	27.7788	34.0532	41.9267	56.563	73.1645	75.2275		49.5	-1.06414
48.15	1.25116	3.2348	4.39447	4.69965	7.90399	7.72089	16.0827	24.7192	32.5622	47.76	72.4181	80.9326	126.282	157.44		48.85	0.90578	1.24147	2.55373	2.03493	3.56081	5.42238	6.33791	7.74171	11.0071	15.0965	20.5896	27.9138	35.5432	46.2244		49.2	0.92322	2.33924	3.29139	4.07264	5.89149	10.1395	12.9349	16.7191	27.6444	35.1395	40.4862	58.2352	72.0292	76.4359		49.55	-0.88098
48.2	1.22054	2.50228	4.42489	5.27938	7.81234	7.96492	16.1742	24.3224	32.6231	47.8514	72.0824	80.1695	128.509	158.844		48.9	1.21095	1.24147	2.70631	1.85182	3.56081	5.39186	6.1548	7.55861	11.2512	14.7608	20.376	28.2495	35.116	45.8276		49.25	0.78885	2.03397	3.25467	3.8284	5.80594	10.1028	12.9226	16.8045	27.3514	36.5066	39.7659	59.1507	70.0637	76.6189		49.6	-1.03351
48.25	1.00681	2.56321	4.66892	5.30979	7.04929	7.56809	16.9675	24.5664	32.9892	48.6448	71.2583	81.1765	130.981	160.339		48.95	1.18044	1.6382	2.43166	1.57716	3.3777	5.26979	5.94118	7.49757	11.1902	14.2725	19.8572	27.9749	35.2381	45.6445		49.3	0.61785	2.30242	3.41326	3.66961	6.15984	10.1027	12.7516	17.0485	27.0827	36.9826	39.2775	59.6022	68.3913	76.3381		49.65	-1.06398
48.3	0.60998	2.95983	4.51623	4.33312	6.40832	7.62902	17.12	26.0006	32.7755	49.4991	71.1361	83.8619	131.439	162.994		49	1.36354	1.6382	2.21803	1.39406	3.25563	5.26979	6.45998	7.46706	11.5869	14.0894	19.7351	27.8833	35.6958	45.5225		49.35	1.05721	2.82723	3.73055	3.62068	6.18416	10.6153	12.8248	17.378	27.046	37.0191	39.607	59.5777	67.7564	75.9595		49.7	-1.21651
48.35	1.12867	2.50196	4.3025	4.21095	6.86598	7.93409	17.1504	26.3362	32.5923	50.4451	70.7698	86.4863	131.347	167.114		49.05	0.99733	1.85182	1.72975	1.36354	3.22511	5.20876	6.73463	7.52809	11.6174	13.8147	19.6436	27.6392	35.9094	45.7361		49.4	1.15477	2.80272	3.85252	3.63279	6.20848	10.3955	13.3618	17.268	27.3755	36.3721	40.9863	59.1504	68.0493	76.582		49.75	-0.97232
48.4	1.09805	2.56289	4.27188	4.36343	7.20156	7.93399	17.6691	26.3666	33.6908	51.0858	70.4645	90.1178	130.584	170.318		49.1	1.14992	1.60768	1.91286	1.39406	2.98097	5.02565	7.07033	7.61964	11.8921	14.0588	20.0403	27.7918	36.062	45.8276		49.45	1.02039	2.81483	3.60828	3.96229	5.92762	9.95594	14.0697	17.5365	27.4608	35.3954	41.621	59.1259	68.7938	78.1688		49.8	-1.12485
48.45	1.43364	2.37968	4.63798	4.79057	7.38456	7.75078	18.1268	25.7562	35.064	50.6585	71.2884	92.9558	130.859	171.508		49.15	0.90578	1.45509	1.91286	1.51613	2.88942	4.72047	6.8567	7.86378	11.6785	14.2114	19.9793	27.8833	35.9705	45.9192		49.5	1.21561	2.86356	3.85233	3.96219	5.29275	9.95584	14.8753	17.4632	27.1922	34.8948	42.1824	58.6497	69.0867	79.8655		49.85	-1.09428
48.5	1.15887	2.98993	4.36322	5.12616	7.72015	7.90326	18.0656	24.5353	36.8034	51.1467	72.0817	95.9465	131.591	172.24		49.2	0.96681	0.84474	1.97389	1.48561	2.79787	4.38478	6.76515	8.22999	11.7395	14.4251	20.2234	28.3106	36.3062	45.4004		49.55	0.89813	2.43621	3.70574	3.93768	5.47576	9.91912	15.2658	17.2311	26.655	35.6027	42.2677	57.5143	69.6847	80.3049		49.9	-1.24682
48.55	1.7386	3.8138	4.57674	5.37019	7.2928	7.68953	18.096	23.8944	38.7869	52.5504	73.699	97.5333	132.262	172.759		49.25	0.78371	0.81422	1.54665	1.30251	2.98097	4.04909	6.30739	8.22999	11.4954	14.5166	20.0098	28.5852	36.5808	45.1563		49.6	0.80037	2.54598	3.51033	4.34041	5.81746	9.96785	15.339	17.5606	26.0567	36.5792	42.5484	56.1349	70.3194	79.609		49.95	-0.91107
48.6	0.94504	3.63059	4.48508	5.15647	6.71286	8.08615	17.6992	24.0163	40.1906	54.1677	75.0417	96.8007	135.161	174.132		49.3	0.96681	0.90578	1.51613	0.96681	2.8589	3.98805	6.24635	8.26051	11.5564	14.6387	20.2844	28.8904	37.0081	44.9426		49.65	1.10545	3.16844	3.49803	4.57225	5.81736	10.2729	15.2046	18.2563	25.5317	37.3969	41.999	55.2192	70.417	78.3393		50	-0.94153
48.65	1.09752	3.26427	4.21032	5.33947	6.68224	8.23864	16.9361	24.1993	40.6788	55.9071	75.713	95.0917	139.312	175.383		49.35	0.99733	1.27199	1.54665	0.87526	2.91994	4.11012	6.03273	8.26051	11.3123	14.8523	20.5286	29.0735	36.8555	45.1868		49.7	1.16639	3.32703	3.32703	4.42567	5.71961	10.2484	14.5453	18.8666	25.0189	37.934	41.6571	54.6454	69.6967	76.7889		50.05	-0.84993
48.7	1.09742	2.50123	4.05762	5.36988	6.68214	8.08594	16.6309	24.0771	40.9839	56.3953	76.5979	92.0398	144.255	174.59		49.4	1.14992	1.21095	1.91286	1.05836	2.82838	4.4153	6.1548	8.19948	11.2818	15.188	20.9558	29.2261	36.8555	45.1868		49.75	0.97098	3.70535	3.37576	4.44998	5.78055	10.2849	13.9348	19.4036	24.9456	38.3489	42.3528	54.3767	69.7454	76.325		50.1	-1.0635
48.75	2.16543	2.50112	4.27114	4.88149	6.59048	8.14687	15.9594	24.016	40.1598	56.6698	76.7504	89.3236	148.406	173.613		49.45	0.99733	1.45509	1.97389	1.1194	2.8589	4.50685	5.88014	8.10792	10.8545	15.7068	21.0474	29.2566	36.7639	45.2173		49.8	1.06854	3.47332	3.50994	4.26678	5.82928	10.1994	14.1179	19.5988	24.9211	38.5441	42.6579	54.7184	70.5632	77.2282		50.15	-0.97189
48.8	1.55497	3.11137	4.05741	4.66776	6.9871	8.05522	15.3794	23.8938	39.5493	56.273	76.6282	87.3704	150.481	172.057		49.5	1.05836	1.45509	2.12648	0.99733	2.61476	4.84254	5.88014	7.83327	10.824	16.1646	21.2	28.8904	37.0996	44.9732		49.85	0.86092	3.21688	3.50985	4.21785	5.6949	9.80867	13.9591	19.1226	24.6524	38.2877	43.085	54.4986	70.5264	78.7174		50.2	-1.03287
48.85	1.67694	3.23333	4.08783	4.88128	7.38372	8.45184	15.654	24.5041	39.5798	54.5334	76.2314	86.7905	151.762	170.927		49.55	0.66164	1.54665	1.94337	0.87526	2.37062	5.05617	5.57497	7.7112	10.6714	16.4392	21.2305	28.5242	36.947	45.0647		49.9	0.78758	3.19236	3.61961	4.4619	5.27977	9.38133	13.7148	19.0249	24.8232	37.7993	44.2446	53.5708	70.1235	79.9136		50.25	-0.91075
48.9	1.24959	3.17219	4.36238	4.94221	7.26155	8.51277	15.5929	25.4805	39.9154	53.3736	75.2242	87.6448	151.671	169.92		49.6	0.47853	1.45509	2.09596	0.99733	2.27907	4.96461	5.75807	7.22292	10.9155	16.1951	21.1389	27.9138	36.5808	44.9426		49.95	0.93397	2.91151	3.71717	4.31531	4.65711	9.43006	13.788	19.1957	25.2015	37.2499	45.6239	52.3256	70.392	81.4027		50.3	-0.78862
48.95	1.58517	2.98898	3.93503	4.66745	7.32248	8.20749	15.3486	26.1518	40.9223	52.9768	73.9423	89.3842	150.511	168.242		49.65	0.44801	1.51613	2.21803	1.18044	2.21803	4.53737	6.03273	7.03981	10.885	15.9204	21.2305	27.4866	35.7263	44.9426		50	1.04373	2.28885	3.92459	4.44949	4.52274	9.53983	14.1053	19.5374	25.5188	37.0789	46.0877	51.4466	71.8323	82.6111		50.35	-0.54443
49	1.73766	3.47716	4.45372	5.18614	6.92564	7.78014	14.8297	26.6705	41.6852	52.7936	72.5995	90.2997	149.778	168.119		49.7	0.93629	1.45509	2.37062	1.45509	2.12648	3.95753	6.45998	6.73463	11.0376	15.5237	21.261	27.1509	34.9329	44.8511		50.05	1.14129	2.58172	4.35174	4.49822	4.98651	9.74725	14.0563	19.8303	26.0436	37.2619	46.2219	51.0925	73.0773	82.7087		50.4	-0.39179
49.05	1.61548	3.11084	3.75171	5.6438	6.19312	7.74951	14.4329	27.0366	41.8682	52.8545	71.3176	90.7268	149.321	168.333		49.75	1.21095	1.69923	2.00441	1.76027	2.157	3.62184	6.36842	6.8567	10.7019	15.4627	21.4441	27.334	34.6582	45.1257		50.1	0.88485	3.14315	4.73006	4.19295	5.45028	10.3941	14.1539	19.6593	26.837	38.5802	45.6846	51.6295	73.6143	82.794		50.45	-0.30018
49.1	2.3478	2.80556	3.87368	5.43007	5.97939	7.62734	13.975	27.5858	41.7765	53.0375	70.8292	90.2079	149.259	169.004		49.8	1.39406	1.57716	1.94337	1.76027	2.40114	3.49977	6.33791	6.64308	10.3357	15.127	21.2	27.4256	34.6582	45.4309		50.15	0.72606	2.87449	4.59569	4.07078	5.63328	10.7602	14.1782	19.2075	27.374	39.935	44.8545	52.6181	73.5776	83.7827		50.5	-0.39168
49.15	1.95096	2.25614	3.50736	5.61307	6.10135	7.2305	13.8528	27.7078	41.6238	52.6712	70.1577	90.0857	149.107	169.218		49.85	1.14992	1.60768	1.69923	1.45509	2.58424	3.92702	6.49049	6.64308	10.1831	15.4321	21.2305	27.7612	34.8718	45.553		50.2	0.46961	2.69129	4.266	4.10731	5.54774	10.516	13.934	18.8778	27.911	41.2899	43.8778	53.1307	73.4677	83.9413		50.55	-0.63577
49.2	2.46966	2.13396	3.84295	4.88055	6.13177	7.26092	13.3949	28.3486	40.5556	52.8237	69.12	91.6115	148.435	168.638		49.9	1.1194	1.33302	1.85182	1.21095	2.73683	4.17116	6.42946	6.52101	10.1831	15.8289	21.0169	27.8528	35.0244	45.7056		50.25	0.65262	2.48367	4.16824	4.07059	5.8284	10.052	13.4456	19.0242	28.5335	41.6316	43.7801	53.8875	73.4187	83.6116		50.6	-0.84934
49.25	1.88972	2.56111	3.9344	4.36164	6.25373	7.07771	13.1812	27.9823	39.9451	52.793	69.242	93.1983	148.16	168.973		49.95	0.90578	1.60768	1.69923	0.84474	2.82838	4.47633	6.24635	6.8567	10.6104	16.4087	21.1389	27.6697	35.4517	45.7361		50.3	0.92108	2.23944	3.89959	3.92401	6.09686	10.174	13.1403	19.0363	29.0217	41.1677	43.6579	53.7653	72.5641	83.9533		50.65	-0.81877
49.3	1.49289	2.68307	4.23947	4.14791	6.58932	7.4133	13.4863	28.1653	39.2736	52.3047	69.3335	94.9987	147.214	168.668		50	1.05836	1.60768	1.88234	0.69215	3.10304	4.38478	5.75807	7.00929	10.7935	16.6529	21.1389	27.2119	35.6653	46.1328		50.35	1.01864	2.11727	3.80184	4.19246	6.59725	10.1739	12.359	19.024	28.8018	40.8136	43.5601	52.8131	70.5499	83.9532		50.7	-0.48302
49.35	1.15709	3.23228	4.36143	4.08677	6.25352	7.96251	13.6693	28.4398	38.5411	51.6942	69.4859	95.5174	146.879	168.088		50.05	1.18044	1.85182	1.69923	0.53957	3.31667	4.4153	5.69704	7.31447	11.2512	16.8054	21.2	26.51	36.3062	46.438		50.4	1.01854	2.3491	3.86278	4.48533	6.53612	10.1494	12.1636	19.1216	28.6797	40.2397	44.2803	51.4458	68.9141	84.8198		50.75	-0.26934
49.4	1.00439	2.80493	4.33081	4.94116	5.97876	8.66431	13.4556	28.5618	38.5105	51.2058	70.2793	94.3577	146.878	166.837		50.1	1.30251	1.57716	1.79079	0.93629	3.43874	3.95753	5.39186	7.3755	11.0681	17.0496	20.9863	26.1133	36.7944	46.8958		50.45	0.74989	2.34901	3.86268	4.61951	6.26746	10.4301	12.2245	19.8173	28.7772	40.1054	44.5365	49.6757	67.3148	85.0516		50.8	-0.23877
49.45	2.0724	3.41518	4.36122	5.15468	6.37538	8.60317	13.0892	28.9279	38.785	51.4804	70.6759	92.4349	146.237	165.494		50.15	1.42458	1.36354	1.94337	1.05836	3.04201	3.98805	5.636	7.31447	11.2207	17.4158	20.3455	25.9302	36.9776	47.2315		50.5	0.9451	2.27567	3.81375	5.14432	6.13309	10.3079	12.4685	20.1834	28.2156	40.3982	45.4763	48.7234	66.326	85.8084		50.85	-0.54389
49.5	2.22489	2.7742	4.42215	5.21561	6.37528	8.38944	12.6619	29.4771	39.3953	53.3418	69.8824	90.8174	144.711	165.158		50.2	1.21095	0.90578	2.43166	1.51613	2.8589	3.8965	5.72755	7.49757	10.9155	17.843	19.8267	26.5711	36.886	47.5977		50.55	1.16473	2.44647	4.35076	5.29071	5.73016	10.381	13.1887	20.3542	28.2766	40.3493	45.6594	48.8088	67.0827	85.8083		50.9	-0.63539
49.55	3.10979	2.71306	4.02532	5.18499	6.86345	7.96209	11.9294	29.4465	39.975	54.8371	68.8447	90.3595	142.911	165.189		50.25	1.24147	0.66164	2.70631	1.57716	2.46217	3.8965	5.97169	7.61964	10.763	17.8125	19.3079	27.0288	36.8555	47.9028		50.6	1.29891	1.9825	4.25301	4.79012	5.41268	10.3932	14.5802	20.9644	28.5084	41.0206	45.4273	48.7599	68.4376	85.7838		50.95	-1.03207
49.6	2.68244	2.10261	4.33039	5.30695	6.92438	7.41266	11.9598	28.9581	39.9444	55.2947	68.3563	90.9393	141.69	165.189		50.3	0.96681	0.78371	2.61476	1.69923	2.49269	3.71339	5.84962	7.98585	10.5799	17.9041	19.3994	27.3035	37.0386	47.6282		50.65	0.96922	2.12889	3.83787	4.38719	5.65672	10.2466	15.1782	20.6958	28.4106	41.5698	44.7558	48.2959	69.8657	85.1123		51	-1.12357
49.65	2.86544	1.98043	3.99459	4.84908	6.83273	7.6567	12.0817	29.2326	39.3339	55.5998	68.7529	91.8242	142.026	166.012		50.35	0.96681	1.05836	2.61476	1.18044	2.49269	4.0796	6.00221	7.8943	10.5799	17.8736	19.3689	27.0899	36.8555	47.5061		50.7	0.73719	2.42176	3.82557	4.09412	6.08387	9.46522	14.9218	20.4271	28.7035	41.704	43.9012	46.6845	70.1708	84.3676		51.05	-1.33714
49.7	2.56016	2.77378	4.72691	4.29966	6.89366	7.38194	12.0511	29.6292	38.6624	54.6537	70.1566	92.6786	143.246	166.775		50.4	0.57008	1.33302	2.37062	0.84474	2.88942	4.47633	6.09376	7.80275	10.6409	18.1787	19.4605	26.9678	36.825	47.1704		50.75	0.51737	2.58035	3.84989	4.32596	5.63211	9.09891	14.7752	19.8899	28.7034	41.3743	43.889	44.9265	70.1829	83.7083		51.1	-1.1845
49.75	1.61401	2.77368	4.39111	4.51318	6.802	6.95459	12.1121	29.8122	38.3572	53.2192	70.5532	93.9602	144.68	167.447		50.45	0.63112	1.05836	2.40114	0.53957	3.04201	4.9341	6.21584	7.49757	10.5493	18.2703	19.491	27.1509	36.825	46.9873		50.8	0.54168	2.32391	3.862	4.78973	5.63201	8.45184	14.238	19.133	28.2516	40.4953	43.5593	43.0222	69.78	83.7082		51.15	-1.15392
49.8	1.09511	3.44496	4.81825	5.06239	7.04603	6.28309	12.173	29.8427	37.9909	52.5477	70.4921	94.0821	146.633	168.728		50.5	0.50905	1.08888	2.06544	0.23439	3.34718	4.90358	6.33791	7.68068	10.885	18.606	19.6436	27.0899	37.0996	46.7737		50.85	0.83455	2.53133	4.17928	4.67977	5.32674	8.67147	13.7252	19.4869	27.7388	40.8126	43.8155	42.3629	69.4503	83.5372		51.2	-1.00128
49.85	0.85086	3.04813	4.20779	5.06229	7.74783	6.58816	12.3255	29.5679	38.2044	52.4561	70.2478	93.6243	147.061	169.857		50.55	0.78371	0.84474	2.00441	0.02077	3.40822	4.75099	6.39894	7.83327	10.9461	18.6975	20.0098	27.1204	37.3132	46.7737		50.9	0.88328	2.48241	4.31346	4.24022	4.92381	8.97655	13.8227	19.9385	27.2505	40.8369	43.2783	43.083	69.7187	83.1709		51.25	-0.87916
49.9	2.34612	3.44475	4.39079	5.03166	7.74773	6.58806	11.8676	29.0795	38.2653	52.6391	70.1257	93.0749	146.511	171.627		50.6	0.90578	0.93629	1.60768	-0.16234	3.34718	4.78151	6.55153	7.98585	11.3123	18.3313	20.2234	26.9067	37.2217	46.8042		50.95	0.71229	2.43348	4.02039	4.41102	5.2533	9.28162	14.2133	20.1459	27.4945	40.9955	43.1195	45.1459	69.6454	81.474		51.3	-0.78755
49.95	2.46808	3.32257	4.94	4.94	7.96125	6.80158	12.2337	27.6756	38.2347	52.5169	70.095	92.5865	145.84	172.787		50.65	1.27199	0.75319	1.57716	0.05128	3.13356	4.72047	6.18532	7.77223	11.4954	17.9346	20.4675	26.7847	37.2827	46.8347		51	0.61453	2.60428	3.8616	4.44754	5.02127	9.86746	14.8479	20.4265	27.6409	41.0686	42.5091	46.6961	69.3523	79.8992		51.35	-0.51284
50	2.98677	3.29195	5.27559	5.24508	7.53389	6.40474	12.6914	26.6074	37.197	51.8149	70.1865	92.0066	145.321	172.634		50.7	1.45509	0.96681	1.39406	0.17336	2.6758	4.65944	6.09376	7.28395	11.7395	17.2937	20.3149	26.8152	37.2827	46.9263		51.05	0.30926	2.51873	3.91034	4.716	5.20428	9.17157	14.3596	21.1955	28.2023	42.1305	42.5822	48.4172	68.0583	78.1169		51.4	-0.57382
50.05	2.46787	3.13926	5.67222	5.00083	7.74741	5.6417	13.6068	25.295	36.7391	50.4415	70.6136	90.5721	145.504	171.81		50.75	1.48561	0.87526	1.24147	0.75319	2.58424	4.50685	6.00221	7.00929	11.8005	17.0496	20.4675	26.9678	37.4658	46.7127		51.1	0.40682	3.11678	4.42293	4.81356	4.94784	9.35457	14.3839	22.0499	28.3975	42.6676	43.1803	48.9298	67.6187	77.8604		51.45	-0.66532
50.1	2.86449	3.13915	5.06176	5.45849	7.47265	6.09936	14.3696	24.4099	36.3728	49.77	71.0713	88.0391	145.076	169.857		50.8	1.60768	0.66164	1.08888	0.96681	2.55373	4.68996	6.27687	6.79567	11.6174	16.6834	20.7422	27.4256	37.3438	46.6516		51.15	0.57762	3.20213	4.04442	4.45946	5.09422	9.53758	14.103	22.6601	28.9712	43.5708	44.7427	49.3203	67.5576	77.7016		51.5	-1.15355
50.15	2.7118	3.26112	5.27528	5.36683	7.53358	6.37391	14.2475	24.1351	36.037	49.953	71.712	85.7806	144.374	168.392		50.85	1.45509	0.11232	1.05836	1.39406	2.91994	4.65944	6.42946	7.03981	11.709	16.6223	21.1695	27.7002	37.2217	46.438		51.2	1.39539	3.67811	3.67811	4.5326	5.25282	10.1723	14.4813	22.7333	28.9711	44.0468	46.5004	49.3446	68.9613	78.3851		51.55	-0.90936
50.2	3.16946	2.95584	4.66482	5.33621	7.28933	7.13674	13.4844	24.135	36.1895	50.9905	71.0711	84.2241	143.52	168.453		50.9	1.30251	-0.34544	1.30251	1.42458	2.6758	4.81203	6.45998	7.16188	11.3123	16.3477	21.4746	27.8528	37.0386	45.9497		51.25	1.34647	3.20194	3.34842	4.36161	5.58231	9.48856	14.3714	22.4402	29.5081	44.0711	47.9163	49.1004	69.8889	78.8123		51.6	-0.7262
50.25	2.92521	3.35246	5.21403	5.00041	7.10612	7.16716	13.1181	24.0129	36.3725	52.1806	70.3691	83.2475	142.604	169.032		50.95	0.93629	-0.25389	1.42458	1.54665	2.55373	4.84254	6.58205	7.31447	11.1292	15.9815	21.3831	27.6392	36.6113	45.5225		51.3	0.8825	3.45819	3.45819	4.82538	5.82635	9.72039	15.3722	22.2814	29.3859	43.4973	48.9416	48.4289	70.072	79.801		51.65	-0.51252
50.3	2.77252	3.47443	4.90875	4.72565	6.80084	7.22809	13.179	23.7076	36.5555	52.4551	70.43	82.9422	141.353	169.673		51	0.93629	-0.22337	1.6382	1.45509	2.27907	4.99513	6.55153	7.16188	10.763	15.8289	21.4746	27.4866	36.5503	45.0952		51.35	0.16219	3.09188	3.87313	4.64217	5.69198	9.0245	15.128	22.3057	29.5567	42.8868	48.9415	46.9395	67.2764	81.0094		51.7	-0.72609
50.35	1.79585	4.45088	4.72554	5.1833	6.70918	7.28902	12.8127	23.799	36.4028	52.333	70.674	83.4304	140.285	170.924		51.05	0.90578	-0.00975	1.60768	1.27199	2.18752	5.02565	6.76515	6.97877	10.885	15.5542	21.322	27.4256	36.5198	45.0037		51.4	0.12547	3.27489	4.01952	5.32567	5.77733	9.18309	15.311	22.0859	29.459	43.2651	49.4785	46.0483	64.0293	81.7661		51.75	-1.00069
50.4	1.58213	4.02353	4.96958	5.21372	7.16684	7.04477	13.8197	23.4937	36.6163	52.3023	70.8265	84.0711	139.003	171.382		51.1	0.81422	-0.25389	1.76027	1.24147	2.21803	5.17824	6.79567	6.8567	11.2207	15.6152	21.5051	27.273	36.7944	44.7901		51.45	-0.11877	3.17713	3.94618	4.89832	5.66737	8.8412	14.4808	22.4154	29.3612	43.6068	48.9779	45.5966	61.7343	82.0712		51.8	-1.12271
50.45	1.33788	4.29808	4.78637	5.73241	7.83812	7.34984	14.6435	22.9443	36.0974	53.3398	71.2842	85.0171	137.538	170.802		51.15	0.57008	-0.28441	1.66872	0.84474	2.157	5.42238	7.07033	6.36842	11.4649	15.6458	21.8103	27.3035	36.9165	44.5154		51.5	0.86991	3.56766	3.6287	5.13016	5.30106	9.7078	14.6272	22.0735	28.9095	43.5823	48.6848	46.7439	60.721	81.18		51.85	-1.12266
50.5	1.52088	3.01624	4.90833	5.61023	8.93665	7.1056	15.4674	22.5475	35.0902	54.0111	72.047	85.3832	137.324	170.192		51.2	0.4175	-0.37596	1.72975	0.78371	2.24855	5.54445	7.03981	6.1548	11.8921	16.0425	21.9629	26.9678	36.7639	44.3018		51.55	0.82098	2.7619	3.2868	5.17889	4.93475	10.0251	14.1877	22.1955	27.9938	42.3371	47.9401	47.3054	60.6843	80.9601		51.9	-0.72588
50.55	1.24612	3.04665	4.57253	5.85427	8.47878	7.41067	15.8335	22.2117	33.8694	54.4382	72.2605	85.2305	137.721	168.604		51.25	0.53957	-0.28441	1.69923	0.47853	2.03493	5.636	6.94826	5.97169	11.9837	16.4087	22.0239	26.8762	36.7944	43.783		51.6	1.06502	2.70077	3.66512	5.30086	4.97127	10.3912	14.4928	21.6217	27.7618	43.3258	47.9034	48.5016	61.5509	81.2164		51.95	-0.78686
50.6	1.76481	2.31413	5.51847	5.76261	8.11247	7.53263	15.2841	21.9369	32.0382	54.6213	72.7487	85.7492	138.575	167.628		51.3	0.32594	0.02077	1.66872	0.66164	2.03493	5.23927	6.91774	6.1548	12.2888	16.2561	21.7798	27.1814	36.6419	43.783		51.65	0.36913	2.24901	3.55516	5.28856	5.39842	9.91502	14.81	21.6826	27.3955	45.0591	47.4883	49.1728	62.979	82.9253		52	-0.84784
50.65	2.13092	2.95489	4.81646	5.45733	7.25787	7.99029	15.4671	22.5472	30.1155	53.9192	72.535	87.1224	140.467	167.262		51.35	0.32594	0.23439	1.91286	0.69215	1.8213	5.05617	6.45998	6.21584	12.1668	16.012	21.9324	27.4256	37.0996	44.0271		51.7	0.57655	1.98036	3.87245	4.93446	5.11756	9.53651	15.3226	21.6581	27.9325	47.4882	46.8168	50.5643	63.0399	83.3402		52.05	-1.214
50.7	2.8022	2.64961	4.78584	5.91499	6.92207	8.23433	14.9482	23.371	29.0778	53.0036	72.3823	87.8242	142.42	167.2		51.4	0.23439	0.63112	1.79079	0.99733	2.09596	5.02565	6.36842	6.30739	12.0142	15.5237	21.7493	27.7918	37.5574	44.7595		51.75	0.63749	2.02909	3.17655	5.16629	5.0076	9.48758	16.177	22.0364	27.8836	49.075	45.7303	51.7361	62.2342	82.4734		52.1	-1.27498
50.75	2.22226	3.53451	4.2059	5.91489	7.16611	7.77646	15.4974	23.7677	29.2608	52.4237	72.1685	87.8851	143.915	167.78		51.45	0.63112	0.6006	2.03493	1.21095	2.24855	5.02565	6.1548	6.73463	11.8311	15.3406	21.6577	27.7002	38.2288	45.614		51.8	0.68622	2.27313	3.27411	4.70233	4.38495	9.14569	15.9572	21.9631	27.8835	49.9538	44.8879	52.1144	60.7082	79.6291		52.15	-1.24441
50.8	2.31371	3.65648	4.93822	6.28099	7.04393	7.6848	15.009	24.8662	30.2373	52.0268	72.1989	87.8239	144.77	169.55		51.5	0.96681	0.84474	1.85182	1.1194	2.3401	5.02565	6.36842	6.94826	11.4343	15.3101	21.6883	27.9444	39.0222	46.0108		51.85	0.99129	3.04207	3.0787	4.89754	4.88534	9.63387	16.1524	21.4137	27.4439	50.5396	44.9854	51.5528	59.9635	77.7003		52.2	-1.39694
50.85	2.3136	4.11414	4.63294	5.48743	7.47107	7.16589	15.6193	24.9882	32.0377	51.2028	71.9547	87.0914	143.946	171.381		51.55	1.1194	0.87526	1.6382	1.24147	2.55373	4.9341	6.42946	7.1924	11.3123	15.0965	21.6272	28.0054	39.3884	46.3464		51.9	0.6494	2.72459	3.51805	4.26268	5.47118	9.25536	15.2612	21.0962	27.7734	50.3442	45.7422	51.8213	59.5361	75.9424		52.25	-1.12223
50.9	2.4966	3.83937	5.02956	5.15163	7.56252	7.74562	15.8023	24.927	33.3194	50.4702	72.4734	86.4505	142.023	173.059		51.6	1.33302	0.84474	1.33302	1.14992	2.55373	4.87306	6.45998	6.91774	10.9766	15.2185	21.7493	28.0054	39.4495	46.2549		51.95	0.77137	2.82215	3.92079	4.71424	6.11805	9.81678	15.139	20.6078	28.2494	49.8436	46.4623	52.1508	59.3041	75.8446		52.3	-1.00011
50.95	2.55753	3.56461	4.90738	4.87687	8.50846	7.59293	17.267	25.2931	33.4108	50.1039	73.9687	86.5419	141.748	175.226		51.65	1.21095	0.78371	1.14992	1.33302	2.95045	4.50685	6.58205	6.76515	10.763	15.0049	21.4136	28.4326	39.0528	46.1328		52	-0.15646	2.41922	4.01834	5.06815	6.72831	10.0364	14.8704	21.0105	29.2015	48.4519	46.743	52.1018	58.5472	75.93		52.35	-0.63384
51	2.28277	3.47295	5.42608	5.51763	8.29473	7.95904	17.6026	24.9268	32.7088	49.8597	75.1282	86.6639	142.023	177.271		51.7	1.30251	0.57008	1.54665	1.27199	2.8589	4.44582	6.30739	6.61256	10.6714	14.9744	21.2915	28.5242	38.7171	46.0718		52.05	0.09979	2.87079	4.31122	5.37323	6.26434	10.2805	15.4807	21.0593	30.1169	47.634	46.9992	51.4059	57.9123	76.8576		52.4	-0.4812
51.05	2.55732	3.86958	4.93769	5.54804	8.26411	8.14204	18.2128	25.3234	31.9458	49.4018	75.9521	86.4501	142.694	178.979		51.75	0.99733	0.6006	1.76027	1.24147	2.73683	4.4153	6.12428	6.52101	10.4273	14.9439	21.3831	28.5242	38.5034	45.9192		52.1	0.47811	3.16366	3.77401	5.50741	6.09335	10.4635	15.1998	21.4132	30.4464	46.8404	47.2677	50.3927	57.0821	77.8585		52.45	-0.48115
51.1	2.25204	3.86947	5.12069	5.88363	8.38607	8.35556	17.5719	24.5604	31.3658	48.7608	76.4403	86.7857	143.609	179.681		51.8	0.87526	0.35646	2.06544	1.33302	2.49269	4.38478	5.636	7.00929	10.3357	14.9439	21.2305	28.1274	37.9541	46.3159		52.15	0.96629	3.13915	3.62743	5.09227	5.4951	10.1216	15.4316	20.6806	30.4707	45.7539	47.1455	49.2573	56.2886	79.5552		52.5	-0.38954
51.15	2.67918	3.53367	4.99852	5.05955	8.56907	8.9658	17.938	24.6823	31.091	48.303	76.959	86.4805	144.159	178.735		51.85	0.75319	0.35646	1.85182	1.24147	2.27907	4.44582	5.51393	7.34499	10.2136	15.127	21.3831	27.7002	37.4353	46.5601		52.2	1.41786	3.29774	3.37098	5.37294	5.93446	10.4877	15.0043	20.827	30.5682	43.8007	46.2421	48.1952	56.3129	81.4838		52.55	-0.45052
51.2	2.09924	3.04529	5.151	5.21203	8.4469	8.4469	17.7853	24.5602	32.5253	47.9061	76.7758	85.9921	144.159	177.301		51.9	0.57008	0.35646	1.60768	1.51613	2.46217	4.4153	5.72755	7.49757	10.2747	14.8218	21.4136	27.6087	37.0386	46.8958		52.25	0.99051	2.84598	3.7371	5.00663	6.01981	10.4632	14.406	20.5462	30.3728	41.8963	45.2166	46.4495	57.1184	83.4734		52.6	-0.35891
51.25	2.58742	3.22829	4.35744	4.75417	7.77541	8.47731	17.419	25.4756	32.8303	48.1502	76.4399	85.7783	144.219	175.653		51.95	0.6006	0.44801	1.51613	1.69923	2.24855	4.9341	5.84962	7.22292	10.6104	14.6997	21.4746	27.6087	36.7944	47.0178		52.3	1.10028	3.19989	3.95672	5.61688	6.25165	10.988	13.8322	20.6682	29.5304	40.5046	44.5939	45.485	58.8395	84.1081		52.65	-0.603
51.3	1.97696	3.35025	4.57096	5.54752	7.74478	8.08048	16.8695	25.0482	33.1049	47.7838	75.5243	85.8087	144.586	174.706		52	0.32594	0.50905	1.45509	1.97389	2.46217	5.26979	6.27687	6.8567	10.5799	14.5471	21.4136	27.6087	36.7639	46.7737		52.35	0.79501	3.0411	4.29842	5.14071	5.53133	10.7804	13.649	19.9112	29.4083	38.9176	44.6427	44.8136	60.3775	82.6065		52.7	-0.6945
51.35	2.37358	3.31963	3.92998	4.90654	7.34795	8.44658	16.3506	25.1397	32.8606	47.5701	74.4866	86.2359	144.769	173.791		52.05	0.38698	0.32594	1.72975	1.91286	2.43166	5.4529	6.33791	6.82619	10.6104	14.303	21.0169	27.6697	36.6419	46.6821		52.4	0.86815	3.46825	4.50585	5.39696	5.1162	11.2075	13.2705	19.8135	29.6279	38.1118	44.6792	44.8379	62.0376	81.581		52.75	-0.45031
51.4	1.79365	3.16694	4.29609	5.51679	7.71406	8.78217	16.5947	24.0104	33.1047	47.5395	73.693	86.8766	144.707	173.608		52.1	0.23439	0.6006	1.6382	1.60768	2.6758	5.57497	6.52101	6.55153	10.4883	14.5777	20.6506	27.395	36.8555	46.6516		52.45	0.40419	3.26063	4.26161	5.18934	4.7743	11.122	13.0873	19.496	29.7377	38.1117	43.8612	44.0687	63.7099	81.349		52.8	-0.20611
51.45	1.67147	3.1058	3.89925	5.11996	7.89706	8.8431	16.1978	23.7662	33.4098	48.1497	73.3878	88.0057	143.853	173.455		52.15	0.11232	0.87526	1.72975	1.39406	3.01149	5.30031	6.42946	6.64308	10.3967	14.7302	20.3455	27.395	37.3438	46.5906		52.5	0.52616	3.29715	4.15165	5.29911	4.90848	11.8299	12.5989	19.9109	29.6033	38.9539	42.7991	43.7757	66.554	82.6307		52.85	0.19067
51.5	1.33567	3.04466	4.38743	5.63865	8.20213	8.81248	17.1743	22.8506	33.1655	47.7529	73.8454	88.6159	142.907	173.882		52.2	0.0818	1.39406	1.85182	0.99733	3.1946	5.08668	6.12428	6.58205	10.3967	14.9133	20.1624	27.334	37.4658	46.377		52.55	0.56268	3.11395	3.69989	5.07928	4.89618	11.7687	12.3669	19.923	29.5666	39.1369	41.6516	42.5183	69.447	82.4597		52.9	0.37383
51.55	1.76281	1.94592	4.32629	5.02819	7.86633	8.56823	16.9911	22.4842	33.8368	46.8373	74.6693	88.8905	141.9	173.729		52.25	-0.1013	1.69923	1.91286	1.1194	3.53029	4.75099	6.06325	6.61256	9.90846	14.8828	20.3149	27.2119	37.4658	46.0108		52.6	0.81893	2.93075	3.95614	5.04256	5.12801	12.2447	12.4522	20.2403	29.9693	39.7471	41.3829	42.0299	71.6441	81.6051		52.95	0.46543
51.6	2.12892	1.88478	4.3567	5.18068	7.80519	9.11744	17.2046	21.5076	34.3555	46.1658	76.2561	90.0195	141.838	172.02		52.3	0.11232	1.79079	2.00441	1.1194	3.34718	4.81203	5.84962	7.00929	9.48122	14.9133	20.4065	27.1509	37.2217	45.8582		52.65	1.12401	2.8452	3.78514	5.38426	5.57958	11.8174	12.8794	20.0449	30.018	38.8681	40.7236	42.0176	71.168	81.4341		53	0.40445
51.65	2.22037	1.82364	3.89883	4.81436	7.16421	9.08682	17.0214	21.4464	35.2709	45.4027	77.4157	91.0265	141.228	169.914		52.35	0.0818	2.21803	1.66872	1.02785	3.10304	5.02565	5.72755	7.25343	9.08449	15.0354	20.5286	26.8152	37.0081	45.9497		52.7	1.41688	2.56434	4.3954	6.00672	5.99452	12.0126	12.9281	20.0082	30.5184	37.8793	40.7846	42.6889	69.349	83.1307		53.05	-0.17533
51.7	2.67803	2.49492	3.53252	5.45512	7.25566	9.51396	16.9297	21.5379	34.813	46.2571	77.7818	92.6133	139.671	167.748		52.4	0.11232	2.21803	1.48561	1.08888	2.98097	5.26979	5.69704	7.3755	9.23707	15.0965	20.8643	26.5405	37.1301	45.614		52.75	1.74637	2.21024	4.13895	6.06766	5.97001	11.4876	13.4285	19.9349	30.6648	36.7683	40.052	43.6775	67.2249	85.0594		53.1	-0.54148
51.75	2.89154	2.00653	4.17328	4.99726	7.10297	8.87299	16.777	21.965	34.874	46.5012	77.7206	94.0475	137.352	165.733		52.45	0.0818	2.12648	1.1194	1.1194	2.88942	5.51393	5.66652	7.1924	9.69484	15.249	21.0779	26.6931	36.9165	45.3088		52.8	1.59979	2.24676	4.28534	5.93329	5.99432	11.402	13.4894	19.8859	31.2507	36.756	39.6613	44.361	66.59	86.2678		53.15	-0.84661
51.8	3.1661	2.28109	4.50887	5.18026	7.49959	9.14754	16.5938	21.9954	34.0804	47.6302	77.8426	95.1461	134.514	164.787		52.5	-0.13182	1.69923	0.90578	1.21095	2.88942	5.36134	6.03273	6.88722	9.9695	15.5847	21.4136	26.9678	36.5198	44.9732		52.85	1.47762	2.97909	3.98006	5.4327	6.34823	10.7794	13.8067	19.4708	30.9576	37.6226	39.0142	44.8126	67.3712	86.3897		53.2	-0.78552
51.85	2.06736	2.21995	4.93601	4.99705	7.13328	8.44553	16.3496	22.1479	33.9887	48.9118	77.812	94.7492	133.049	166.374		52.55	-0.04027	1.42458	1.02785	1.24147	2.6758	5.33083	6.39894	6.76515	10.5799	15.8594	21.4136	27.5171	36.0315	44.668		52.9	1.19676	3.40624	4.63915	5.4326	6.61669	10.8281	13.1596	18.9946	30.8721	39.7832	38.4404	44.7392	67.8594	85.2666		53.25	-0.41925
51.9	1.94518	2.89123	4.02038	5.66833	7.25524	8.59801	16.1359	22.7277	33.9276	50.6818	77.6593	94.2609	132.957	169.029		52.6	0.0818	1.6382	1.27199	1.30251	2.70631	5.30031	6.58205	6.45998	11.3123	16.2866	21.5051	27.7612	35.6348	44.8206		52.95	1.14784	3.62587	4.18739	5.26161	6.34803	10.5717	12.9276	19.0311	30.2616	42.4564	38.3915	45.8012	69.0555	84.412		53.3	-0.54127
51.95	1.76197	3.13526	4.29493	6.12599	6.85841	7.77393	17.0818	23.0938	34.7515	52.94	77.9338	93.9556	134.513	172.416		52.65	0.14284	1.6382	1.69923	1.48561	2.88942	5.33083	6.88722	6.33791	11.8616	16.897	21.8713	27.7002	35.8484	44.729		53	1.18436	3.22294	4.34598	5.31034	6.03055	10.9256	12.427	18.7625	29.9319	44.6536	38.3792	46.6189	69.5926	83.4109		53.35	-0.60225
52	2.12808	3.34878	4.17276	6.58364	6.94985	8.47573	17.0817	23.9176	35.3922	54.1911	76.6215	94.047	136.1	176.383		52.7	0.29543	1.76027	1.88234	1.30251	2.98097	5.78859	6.82619	6.70412	12.2583	17.2632	22.2681	27.7002	36.1536	44.5459		53.05	1.02557	3.27167	4.15057	4.94403	5.38348	10.8278	13.0739	18.6769	28.6989	46.4723	38.3791	47.7419	71.1794	82.1657		53.4	-0.84634
52.05	2.43315	3.47075	5.14921	5.94267	6.76664	8.26201	17.3257	24.0701	35.7278	54.8013	75.5533	94.6573	137.565	180.29		52.75	0.29543	1.76027	1.85182	1.1194	3.01149	6.21584	6.76515	6.94826	12.2583	17.5073	22.7869	27.4256	36.2146	44.4238		53.1	0.8912	3.10067	4.69979	5.15145	5.24911	11.0963	12.9518	18.567	27.6368	46.7652	37.6466	47.8883	72.2535	80.5909		53.45	-0.96836
52.1	2.82977	2.76874	5.05756	5.57635	7.01068	8.7807	16.0134	24.4362	35.7888	53.9467	74.1188	95.5117	139.457	182.273		52.8	0.47853	1.48561	2.00441	1.14992	2.73683	6.61256	6.79567	7.3755	12.1973	17.0496	23.0615	27.0288	36.3062	44.4238		53.15	0.84227	3.3203	4.65087	4.73632	4.95604	11.2915	12.9883	18.518	26.6235	46.8506	37.854	47.0825	72.6074	79.9072		53.5	-0.84623
52.15	3.16536	2.92122	5.27107	4.9659	7.4073	8.29231	15.3114	24.0394	35.453	53.4278	72.898	96.305	141.105	182.059		52.85	0.4175	1.39406	1.76027	1.30251	2.58424	6.61256	6.70412	7.65016	12.2278	16.5613	22.6953	26.8152	36.2756	44.8511		53.2	1.12294	3.1371	4.45546	5.02919	5.2245	11.3524	12.7562	18.1395	26.0741	46.1913	37.7074	45.7396	71.4843	78.7841		53.55	-0.99877
52.2	2.67697	1.94455	4.53855	4.78269	7.19358	8.56687	14.1516	24.4665	35.9716	52.2985	71.7688	97.2509	142.478	181.846		52.9	0.11232	1.24147	1.36354	1.72975	2.46217	6.45998	7.00929	7.65016	12.1362	16.3782	22.2986	26.4185	36.1841	45.2783		53.25	1.11063	3.08817	3.82059	4.40653	4.83378	11.5965	12.7195	18.5911	26.0984	46.0569	37.9026	44.47	69.0061	76.6477		53.6	-0.93768
52.25	2.82946	2.28014	4.08068	4.87413	7.22399	8.23107	14.3346	23.795	35.7579	52.4205	70.7921	98.8683	143.088	180.442		52.95	0.23439	1.18044	1.08888	2.03493	2.09596	6.30739	6.97877	7.74171	12.1668	16.012	22.0545	26.388	36.3062	45.3699		53.3	1.13495	3.19794	3.89374	4.57733	5.45624	11.5475	12.9147	18.9328	25.8542	46.1056	37.9636	44.6408	66.7966	75.2072		53.65	-0.81555
52.3	2.43262	1.91382	3.86695	5.05713	7.01026	8.32252	14.0598	24.1001	36.2156	52.6951	71.1887	99.7227	143.363	177.359		53	0.23439	1.27199	0.78371	2.18752	2.12648	6.00221	6.97877	7.55861	12.2583	15.8899	21.7493	26.7847	36.0925	45.4309		53.35	0.91512	3.1246	3.51522	4.65048	5.62704	11.7305	12.939	18.8717	26.2447	46.2276	37.7926	44.836	64.5626	73.8277		53.7	-0.84602
52.35	2.18838	2.06631	4.04995	5.6979	7.13222	7.68154	14.6701	23.3981	36.2155	53.58	71.0665	100.18	142.63	173.056		53.05	0.29543	0.90578	1.05836	2.21803	2.06544	5.69704	6.8567	7.52809	12.0752	15.7373	21.5662	26.9983	35.6348	45.4614		53.4	0.96385	3.63719	3.38085	5.40721	5.9077	11.1201	13.5249	18.8594	25.9883	46.2519	37.8535	45.6172	63.7812	73.9131		53.75	-0.66286
52.4	1.73051	2.18827	4.29398	5.60624	6.36918	7.58988	14.1206	24.2525	37.4056	54.4038	71.4327	100.485	141.501	169.943		53.1	0.32594	0.66164	1.14992	1.76027	2.06544	5.48341	6.55153	7.58913	12.1057	15.2796	21.2915	27.3645	35.2991	45.2173		53.45	0.82948	3.9911	3.69813	5.1996	5.60243	11.0223	13.7934	18.9325	25.683	46.0321	37.9144	46.3007	63.5248	75.4389		53.8	-0.66281
52.45	1.57782	2.61541	4.29388	5.75872	6.61322	7.19305	14.4868	24.3439	38.2599	54.4648	70.7001	100.058	140.402	168.356		53.15	0.0818	0.38698	0.81422	1.66872	2.09596	5.26979	6.33791	7.28395	11.9837	14.8828	20.7422	27.7002	34.8413	45.2478		53.5	1.18339	4.69901	4.01542	5.11405	5.33378	10.8025	14.5745	19.9578	25.3533	46.1175	38.7566	47.7654	63.9031	78.0511		53.85	-0.84586
52.5	1.60823	3.4698	4.59895	5.17878	6.36897	7.89485	14.1204	25.3814	39.7247	54.7393	70.7916	99.295	139.761	168.112		53.2	0.11232	0.11232	0.63112	1.60768	1.69923	5.30031	6.18532	7.1924	11.709	14.4556	20.5896	27.8223	34.6582	44.8816		53.55	1.29315	4.35712	4.1618	5.65106	4.86981	11.2541	14.7697	20.8122	25.634	45.4216	39.3791	48.9128	63.7687	79.9675		53.9	-0.93736
52.55	1.66916	3.95798	3.89694	5.75851	6.79611	8.23044	14.4865	25.1067	39.8161	54.0984	70.1811	96.8535	138.937	169.15		53.25	-0.00975	0.53957	0.4175	1.69923	1.51613	5.54445	6.12428	7.10084	11.77	13.9368	20.5591	28.0359	34.7803	44.3018		53.6	1.51278	4.5035	3.73446	6.11483	4.71102	10.7901	15.2213	21.5811	25.8902	45.0919	40.5875	49.3521	63.5245	80.2359		53.95	-1.15093
52.6	2.0963	4.47667	4.07994	5.75841	6.46031	8.77965	14.5169	26.0221	39.9991	54.5865	69.8758	94.6256	139.334	170.065		53.3	0.02077	0.81422	0.53957	2.06544	1.51613	5.57497	6.33791	7.03981	11.5564	13.5095	20.9253	28.1885	35.0244	43.844		53.65	0.90233	3.61229	3.91747	6.16356	4.6743	10.4726	15.0015	21.874	25.5483	44.3227	41.979	49.3887	64.2324	80.5288		54	-1.15087
52.65	2.12671	3.59156	4.04932	6.2771	7.16211	8.65747	15.3713	26.5713	38.9919	54.1287	69.1128	93.8931	140.127	171.103		53.35	0.20387	0.96681	0.6006	2.27907	1.48561	5.81911	6.8567	7.46706	11.3123	13.0518	21.4441	28.1885	35.3906	43.6609		53.7	0.71913	3.2704	3.73427	5.22352	4.3202	9.8744	14.6351	22.0082	25.3895	44.2128	43.1264	48.5219	64.684	79.9794		54.05	-0.84564
52.7	2.24868	3.56093	4.44594	5.91079	7.4977	8.7184	16.0426	28.036	38.4425	55.0441	69.1432	95.0221	139.944	172.201		53.4	0.11232	0.87526	0.57008	2.30959	1.66872	5.69704	7.22292	7.98585	11.3428	12.9602	21.8103	28.3411	35.7569	43.5999		53.75	0.05985	2.55009	4.06376	4.75956	4.491	10.033	14.4642	21.532	25.1941	44.6155	43.993	48.0579	65.2698	79.0149		54.1	-0.81507
52.75	1.36356	3.1641	4.65946	5.63602	7.74173	8.99296	16.5613	28.5852	37.9236	54.5862	69.4483	97.0667	138.845	173.849		53.45	-0.00975	0.69215	0.84474	2.24855	1.6382	5.60548	7.58913	8.04689	11.4038	13.6621	21.9934	28.4326	35.7874	43.905		53.8	0.34052	3.0871	3.57538	4.34442	4.19794	10.6799	14.7692	21.1047	25.9875	45.1159	43.8586	46.8249	65.5261	77.7453		54.15	-0.63191
52.8	1.11932	3.40813	4.96453	5.36126	7.61956	9.4201	17.3547	29.4701	38.4118	55.2575	69.9975	98.8366	135.641	175.131		53.5	0.02077	0.90578	1.18044	2.03493	1.54665	5.57497	7.31447	7.92482	11.2207	14.242	22.207	28.3716	35.9094	44.2407		53.85	0.1329	2.86727	3.69735	4.69833	4.61288	10.5455	15.8067	20.8726	26.3414	46.129	43.6144	45.8604	66.8932	76.8297		54.2	-0.78445
52.85	0.93611	3.07234	5.17805	4.65925	7.5279	9.54206	17.3851	29.6226	37.8013	55.8983	70.15	100.912	133.688	176.9		53.55	0.05128	1.14992	1.42458	1.85182	1.51613	5.20876	6.88722	7.3755	11.0376	14.6082	22.207	28.4021	36.3367	44.1187		53.9	0.37694	3.00145	3.63622	4.9912	4.39305	10.2524	15.9409	20.4941	27.0005	47.728	43.1382	44.896	68.6265	76.8784		54.25	-1.05905
52.9	0.81393	2.43136	5.14743	4.90329	7.43624	9.41989	17.9038	29.9887	37.5876	57.2409	69.8142	102.407	132.497	180.044		53.6	0.23439	1.08888	1.60768	1.88234	1.48561	5.08668	6.42946	6.94826	10.7019	14.7608	22.1765	28.5547	36.4588	44.2102		53.95	0.23036	2.94032	3.9413	5.6869	4.71034	9.97157	15.8554	20.9823	27.8915	51.5243	42.6742	44.4076	71.0189	76.4266		54.3	-0.84538
52.95	1.30211	2.6754	5.23887	4.90318	7.10045	9.41978	17.5375	29.9276	37.1603	58.2784	70.3024	103.231	133.199	182.79		53.65	0.11232	1.02785	1.48561	2.00441	1.54665	5.17824	5.78859	7.03981	10.6104	14.7608	22.2376	28.6157	36.4282	44.2407		54	0.31571	3.14774	4.1121	5.17411	4.60038	10.5086	15.4768	21.1287	27.9524	54.4295	42.8328	45.1643	74.4978	76.1336		54.35	-0.60118
53	1.48511	2.58374	4.47583	5.6355	6.73413	8.47363	17.6594	29.6528	37.9231	58.4919	70.699	103.261	133.962	185.323		53.7	-0.19286	0.90578	1.33302	2.52321	1.85182	5.30031	5.57497	7.25343	10.7019	14.8523	21.8713	28.7683	36.062	44.3933		54.05	0.02264	3.84345	3.90448	4.74677	4.82001	10.5573	15.1105	21.5558	28.1232	55.7477	43.2477	45.6037	77.6472	75.6818		54.4	-0.44854
53.05	2.03432	3.34657	4.44521	5.20815	6.58144	8.71767	16.7133	29.4696	38.1671	57.6373	71.4618	103.871	134.053	187.245		53.75	-0.28441	0.6006	1.54665	2.6758	2.09596	5.4529	5.69704	7.58913	10.6714	14.9439	21.6883	28.6462	35.5737	44.5459		54.1	0.03475	3.69686	4.38046	4.29501	4.85653	10.3009	15.2325	21.5435	27.8546	55.8331	44.6759	46.568	79.8443	75.6573		54.45	-0.41797
53.1	1.85111	3.77371	4.32303	5.54373	6.97806	7.98514	16.4995	29.439	38.991	56.2945	70.6072	103.444	134.053	187.52		53.8	-0.28441	0.75319	1.48561	2.37062	2.49269	5.69704	5.84962	7.92482	10.763	14.9439	21.4746	28.4937	35.2381	44.4238		54.15	0.71825	3.89208	4.13622	4.05077	4.84423	9.38524	15.1226	21.8242	27.6226	54.9907	45.6279	47.8984	80.3203	76.1699		54.5	-0.66206
53.15	1.60686	4.29241	4.53655	5.33001	7.00847	8.19866	15.4924	30.0187	38.9299	54.738	70.4545	102.345	133.565	188.13		53.85	-0.13182	0.72267	1.45509	2.00441	2.70631	5.636	6.03273	8.26051	10.763	14.9439	20.9253	28.4937	35.116	44.3933		54.2	1.07216	3.35487	4.42909	4.24599	5.27138	9.10438	15.1102	22.9716	26.8534	54.6122	46.0307	49.3632	78.7089	76.4384		54.55	-0.87562
53.2	1.78986	3.98713	4.56696	5.02472	7.46613	7.86286	15.0955	30.1712	38.8382	53.9444	70.6375	100.972	133.565	189.534		53.9	-0.00975	0.69215	1.27199	1.48561	2.46217	5.75807	6.24635	8.47414	10.4883	15.0354	20.4981	28.5547	34.9634	44.729		54.25	1.56034	3.25712	4.19706	4.24589	5.10038	9.72684	14.4266	23.8748	26.5603	53.6844	46.3968	51.0232	77.2073	76.7679		54.6	-0.78402
53.25	1.24044	3.10201	4.59737	4.84151	7.5881	8.07638	14.1189	30.4763	38.2888	54.1884	72.1023	98.9577	133.565	191.06		53.95	-0.31493	0.75319	0.93629	1.36354	2.3401	5.78859	6.09376	8.68776	10	15.1575	20.3455	28.3411	34.7193	45.1868		54.3	1.38934	2.81757	4.35565	4.80731	5.42987	9.94647	14.3776	24.6193	27.0607	53.0129	47.0314	51.6213	76.072	76.6091		54.65	-0.78396
53.3	1.8812	2.55259	4.74986	4.44468	7.67954	7.52696	12.776	29.9574	38.1666	55.5311	72.682	97.92	134.938	191.731		54	-0.46751	0.72267	1.05836	1.57716	2.06544	5.57497	6.09376	8.59621	9.54225	15.4016	20.3455	28.2495	34.5972	45.0647		54.35	1.62118	3.23251	3.86727	5.06356	4.90487	10.337	14.3531	24.1065	27.6832	52.1583	48.2764	51.9752	75.669	77.3536		54.7	-0.66184
53.35	1.69799	1.48437	4.29199	5.32959	7.52685	7.19116	11.5246	29.9573	37.0068	56.0498	73.4143	97.6147	135.914	190.175		54.05	-0.37596	0.84474	1.39406	1.6382	1.91286	5.57497	6.30739	8.44362	9.26759	15.5542	20.1929	28.1885	34.3836	44.9121		54.4	1.21825	3.47655	3.96483	5.35643	4.80712	10.2759	14.0478	23.728	29.0015	51.6089	48.7646	52.6221	75.7056	80.7837		54.75	-0.44816
53.4	1.91151	1.69789	4.35292	5.29896	7.06898	6.85536	10.1818	29.652	35.4503	55.714	73.872	99.7203	136.525	187.55		54.1	-0.46751	1.18044	1.69923	1.51613	1.94337	5.36134	6.33791	8.62672	9.48122	15.0965	20.2539	28.0664	34.353	44.3933		54.45	1.48671	3.391	4.37977	5.23427	4.39198	10.3856	14.0111	23.5082	29.3065	51.8529	49.558	52.9638	75.2172	85.642		54.8	-0.47863
53.45	2.33865	2.18606	4.07815	5.84817	6.88577	5.97024	9.5408	29.9571	33.4666	54.8594	75.2757	100.941	136.402	184.681		54.15	-0.6201	1.39406	1.97389	1.48561	1.85182	5.26979	6.6736	8.62672	10	14.6692	20.2539	28.1274	34.5056	43.7219		54.5	1.32792	3.3787	4.31864	5.55155	4.29423	9.84843	13.6326	23.2518	29.3919	51.2791	50.3758	52.805	75.9861	90.5247		54.85	-0.38702
53.5	2.33855	2.67424	4.23064	5.66496	6.51945	6.00066	8.38103	30.1706	32.1847	54.8898	75.9775	102.619	135.639	183.094		54.2	-0.92528	1.39406	2.00441	1.18044	1.66872	5.17824	7.13136	8.68776	10.2441	14.6082	20.5286	28.2495	34.6582	43.3862		54.55	1.16913	3.15888	5.00214	5.85663	4.68475	9.48212	13.7668	23.1174	29.1476	50.5954	50.1071	51.6818	76.8649	92.6608		54.9	-0.29542
53.55	2.43	3.22345	4.50519	5.87848	6.51935	5.45124	7.95368	30.0789	31.7269	54.3099	77.4117	103.321	135.395	183.704		54.25	-1.16942	1.30251	1.76027	1.05836	1.57716	4.99513	7.49757	8.53517	10.5493	14.6997	20.9863	28.158	34.9024	43.4168		54.6	1.21786	3.46395	4.79452	5.63681	4.83114	9.6163	13.8277	22.8243	28.4151	50.0094	49.753	51.4864	77.109	91.9527		54.95	-0.32588
53.6	1.85006	3.22335	3.95577	5.66475	6.21407	5.66475	7.19063	29.6516	31.6047	54.5539	78.1135	104.877	134.296	186.268		54.3	-1.07787	1.05836	1.76027	1.30251	1.42458	4.75099	7.74171	8.10792	10.7019	14.7608	21.3526	27.9444	35.6043	43.6304		54.65	0.54638	3.10985	4.89208	5.74657	5.53905	9.4453	13.8887	22.9097	28.0366	50.4487	48.9961	52.5239	76.6206	92.1479		55	-0.41738
53.65	1.78892	3.07065	4.1998	5.35947	6.4581	5.42051	7.28208	28.6749	31.6351	54.2181	78.7237	105.64	134.022	188.16		54.35	-0.68114	0.93629	1.88234	1.36354	1.36354	4.81203	7.86378	7.40602	10.6104	15.0049	21.261	27.9444	36.5503	43.783		54.7	0.30214	3.58583	4.24501	4.98964	5.70985	9.68935	14.2792	22.7997	26.9623	52.3651	48.4467	53.8666	75.3876	92.5019		55.05	-0.41733
53.7	1.88036	2.94848	4.04711	5.51195	6.36645	6.58007	7.00732	27.6982	31.3603	54.4927	77.8386	106.342	134.174	190.296		54.4	-0.37596	0.72267	1.8213	1.54665	1.66872	4.99513	7.77223	7.07033	10.3662	15.3101	20.8337	27.8223	37.1912	43.9661		54.75	0.08231	3.50028	4.14726	4.59892	6.01493	9.16434	14.0472	22.8728	26.2664	53.6956	48.2757	55.6609	74.8016	92.4773		55.1	-0.75297
53.75	2.00233	2.42957	4.5658	5.20667	6.85462	6.85462	7.03773	26.5995	31.6959	53.577	78.3573	106.098	137.683	191.883		54.45	-0.04027	0.35646	1.88234	1.66872	1.88234	5.08668	7.8943	6.97877	10.1526	15.6458	20.5286	27.4866	37.6184	43.9356		54.8	0.76581	3.67108	3.97626	4.58661	5.68524	9.12763	13.8762	23.4587	25.5827	53.9885	48.3854	56.3444	74.4597	92.9533		55.15	-0.96653
53.8	2.3074	3.16189	4.99295	5.29812	7.67849	7.3428	7.00711	26.6909	30.7193	52.9055	78.3877	105.731	141.254	192.829		54.5	0.20387	0.50905	1.94337	1.66872	2.157	5.36134	7.98585	6.97877	10.061	15.8899	20.3455	27.334	37.4353	44.0881		54.85	0.70468	3.41464	3.51229	4.68417	5.5997	8.83456	13.0582	23.1168	25.3019	53.2193	49.606	56.5274	74.4962	93.1974		55.2	-1.1801
53.85	2.09367	3.03972	4.35197	4.80974	7.92253	7.58683	6.79338	26.111	29.8342	51.349	79.3337	105.121	144.611	193.469		54.55	0.32594	0.78371	1.76027	1.8213	2.40114	5.36134	7.52809	7.25343	9.84743	15.7068	20.4065	27.273	36.8555	44.6375		54.9	0.68017	3.06054	3.56102	4.87938	5.66063	8.83446	13.2168	22.4331	25.3017	52.377	50.6313	56.2588	74.3862	93.0019		55.25	-1.54626
53.9	1.91046	2.97858	4.50445	4.53497	8.44122	7.22052	7.09845	26.1719	28.3692	50.7691	79.8829	105.029	145.862	194.354		54.6	0.20387	0.93629	1.48561	1.97389	2.3401	5.33083	7.07033	7.61964	9.69484	15.3406	20.437	27.0288	36.3062	45.1257		54.95	0.92421	3.1703	3.31679	3.95155	5.4164	9.39589	13.8392	21.5541	24.7523	52.0106	51.2172	55.7094	73.3363	91.8422		55.3	-1.66828
53.95	1.69673	2.70381	3.894	4.47383	8.01387	7.67818	7.25093	25.8056	27.9113	50.1586	81.5307	105.395	146.625	195.85		54.65	0.17336	1.14992	1.33302	1.72975	2.21803	5.39186	6.64308	7.83327	9.42018	15.2185	20.4675	26.6016	36.001	45.0037		55	0.8997	2.75517	3.71952	3.80497	5.90458	9.48124	14.3152	21.1878	24.8133	51.4734	51.1194	55.8558	71.8836	90.4139		55.35	-1.33253
[truncated: 11,925 more rows]
[truncated: 43 more columns]

## Sheet: Panel_A_IV
wild type													slo-2(lf)											scyl-1(zw99)														slo-2(lf);scyl-1(zw99)											scyl-1(zw99) rescue
[truncated: 16 more rows]
[truncated: 19 more columns]
