# Supplementary material for: Slo2 potassium channel function depends on RNA editing-regulated expression of a SCYL1 protein
Source: eLife. 2020 Apr 21;9:e53986. doi: 10.7554/eLife.53986 (PMC7195191; doi:10.7554/eLife.53986)
Supplement: Figure 8—source data 1. [file elife-53986-fig8-data1.xlsx]

## Sheet: Panel_A_trace
time(ms)	wild type	scyl-1(zw99)	rescue
0.5	-3.68554	-0.35825	-3.9993
1	-3.86864	-0.32675	-4.56081
1.5	-3.92967	-0.26377	-4.37769
2	-3.90525	-0.1168	-4.29222
2.5	-3.92966	-0.05381	-4.57297
3	-3.90525	-0.12729	-4.35322
3.5	-3.78317	-0.15879	-4.46307
4	-3.60006	-0.13779	-3.57194
4.5	-3.20943	-0.02232	-0.70327
5	-2.53804	0.08266	-0.45911
5.5	-1.81782	0.15615	-0.36144
6	-1.39057	0.11416	-3.43759
6.5	-1.35395	0.15615	-4.09675
7	-1.78119	0.13515	-4.45074
7.5	-2.36712	0.00917	-4.16996
8	-2.91644	-0.09581	-4.6216
8.5	-3.23381	-0.1273	-4.53614
9	-3.50237	-0.05382	-4.80468
9.5	-3.79533	0.05116	-5.17087
10	-4.06388	0.17714	-4.91451
10.5	-4.16153	0.22963	-4.47503
11	-4.07608	0.17714	-4.29191
11.5	-4.01504	0.01967	-4.67031
12	-3.89297	-0.05382	-4.79237
12.5	-3.77089	0.01967	-4.21862
13	-3.64882	0.16664	-4.45054
13.5	-3.53895	0.25062	-4.79232
14	-3.42908	0.22963	-4.30402
14.5	-3.50232	0.15614	-4.27959
15	-3.77087	0.00917	-4.25515
15.5	-4.05163	-0.13781	-0.84937
16	-4.10045	-0.22179	-0.38549
16.5	-3.95396	-0.1903	-0.20237
17	-3.79527	-0.10632	-0.25118
17.5	-3.63657	-0.00134	-0.42206
18	-3.56333	0.07215	-0.10466
18.5	-3.62436	-0.02233	-0.36099
19	-3.75863	-0.13781	-0.42201
19.5	-3.81966	-0.14831	-0.10461
20	-3.83187	-0.03283	-0.2999
20.5	-3.75862	0.07215	0.0175
21	-3.70979	0.06165	-0.36091
21.5	-3.66095	-0.05383	-0.28765
22	-3.62433	-0.14831	-0.44632
22.5	-3.80743	-0.15881	-0.28761
23	-4.08819	-0.08533	-0.38525
23.5	-4.32012	0.05115	-0.61717
24	-4.38115	0.13513	-0.47067
24.5	-4.2957	0.18762	-0.49506
25	-4.10038	0.21911	-0.20208
25.5	-3.95389	0.13513	-0.16544
26	-3.8074	0.03015	-0.37294
26.5	-3.64871	-0.10633	-0.06775
27	-3.52663	-0.16932	-0.23863
27.5	-3.57546	-0.16932	-0.45834
28	-3.77077	-0.15882	-0.05549
28.5	-3.92945	-0.11683	-0.70245
29	-3.97828	-0.11683	-3.93729
29.5	-3.844	-0.08533	-3.9739
30	-3.69751	0.04064	-3.69312
30.5	-3.67309	0.15612	-2.78978
31	-3.68529	0.16662	-3.79074
31.5	-3.77074	0.07213	-4.43769
32	-3.96605	-0.10633	-3.9494
32.5	-4.14915	-0.25331	-4.43766
33	-4.19797	-0.2848	-3.58315
33.5	-4.17355	-0.17982	-4.08362
34	-4.14913	0.00914	-4.48644
34.5	-4.12472	0.13512	-4.4498
35	-3.94161	0.17711	-4.35213
35.5	-3.66084	0.26109	-4.07135
36	-3.52656	0.42906	-4.21781
36.5	-3.612	0.51305	-3.50979
37	-3.73407	0.38707	-4.22999
37.5	-3.88055	0.12462	-3.5952
38	-4.02703	-0.13783	-1.5444
38.5	-4.03923	-0.25331	-0.48238
39	-3.9904	-0.23232	-2.14252
39.5	-3.96598	-0.25331	-3.91252
40	-3.79508	-0.64174	-4.54727
40.5	-3.51432	-1.30312	-4.41297
41	-3.33121	-2.02749	-3.99792
41.5	-3.30679	-2.60488	-4.60825
42	-3.47768	-2.93032	-4.38851
42.5	-3.6852	-3.20327	-4.4007
43	-3.91713	-3.42373	-4.42509
43.5	-4.12464	-3.63369	-4.25418
44	-4.16126	-3.73867	-2.88697
44.5	-4.03919	-3.66519	-3.1433
45	-3.66076	-3.5812	-4.0344
45.5	-3.0382	-3.66519	-4.19307
46	-2.31798	-3.82266	-4.14423
46.5	-1.87852	-3.87515	-4.27849
47	-2.04942	-3.87515	-4.55923
47.5	-2.52549	-3.83316	-4.42494
48	-3.03818	-3.81216	-4.0343
48.5	-3.36777	-3.70718	-2.03233
49	-3.57528	-3.48672	-0.00594
49.5	-3.73397	-3.0773	-0.46979
50	-3.95369	-2.43692	-0.14019
50.5	-4.08797	-1.64957	-0.7139
51	-3.92927	-0.88321	-0.15236
51.5	-3.6363	-0.4213	-0.0791
52	-3.39215	-0.16935	-1.09227
52.5	-3.34332	-0.12735	-2.17867
53	-3.30669	-0.19034	-0.45747
53.5	-3.29448	-0.28483	-0.24993
54	-3.34331	-0.29532	-0.15226
54.5	-3.48979	-0.21134	-0.53066
55	-3.6973	-0.01188	-0.33533
55.5	-3.75833	0.13509	-0.33531
56	-3.72171	0.20858	-0.28646
56.5	-3.68508	0.18758	-0.10334
57	-3.59963	0.03011	-0.21319
57.5	-3.3799	-0.08537	-3.43583
58	-3.2212	-0.20085	-3.83864
58.5	-3.29444	-0.21135	-4.16822
59	-3.51417	-0.13786	-4.71751
59.5	-3.66065	-0.05388	-4.7175
60	-3.74609	-0.03288	-4.7541
60.5	-3.90478	-0.05388	-5.08367
61	-4.06347	0.01961	-4.59538
61.5	-4.14891	0.0511	-4.81509
62	-4.05125	0.0616	-4.75403
62.5	-3.9658	0.0826	-4.81505
63	-3.978	0.11409	-4.29013
63.5	-4.05124	0.01961	-4.10701
64	-4.02682	-0.07488	-4.25348
64.5	-3.95357	-0.13787	-1.98295
65	-3.79488	-0.19036	-0.56692
65.5	-3.69722	-0.27434	-4.31446
66	-3.66059	-0.37932	-4.42431
66.5	-3.62397	-0.36883	-3.33786
67	-3.61176	-0.32683	-2.08052
67.5	-3.64837	-0.23235	-4.08246
68	-3.80706	-0.20086	-4.58293
68.5	-3.90471	-0.15887	-3.91153
69	-3.86809	-0.11688	-4.14344
69.5	-3.44084	-0.03289	-4.24108
70	-2.72062	0.07209	-4.25327
70.5	-1.93936	0.06159	-4.20443
71	-1.29239	0.03009	-4.26544
71.5	-0.90176	-0.05389	-4.27763
72	-0.59658	-0.12738	-4.35086
72.5	-0.38906	-0.17987	-4.50953
73	-0.26698	-0.14837	-4.11889
73.5	-0.25477	-0.17987	-4.05784
74	-0.29139	-0.24286	-4.13106
74.5	-0.30359	-0.24286	-4.52167
75	-0.30359	-0.10638	-4.33855
75.5	-0.31579	0.05109	-4.36295
76	-0.40123	0.12457	-4.41176
76.5	-0.45006	0.17706	-4.24084
77	-0.43785	0.18756	-4.27745
77.5	-0.25474	0.17706	-4.19198
78	-0.15708	0.25055	-4.44831
78.5	-0.13266	0.35553	-3.77691
79	-0.12045	0.34503	-4.19193
79.5	0.01383	0.28204	-4.38722
80	0.06267	0.21905	-2.9834
80.5	-0.10823	0.19805	-0.48094
81	-0.37678	0.22955	-0.41989
81.5	-0.53547	0.19805	-0.32221
82	-0.62091	0.14556	-0.24895
82.5	-0.70636	0.11407	-0.37101
83	-0.70635	0.11406	0.05626
83.5	-0.63311	0.06157	-0.09021
84	-0.52324	0.01958	-0.54185
84.5	-0.43779	-0.12739	-0.02914
85	-0.26688	-0.22188	-0.28547
85.5	-0.14481	-0.26387	-0.24883
86	-0.1448	-0.23237	-0.30985
86.5	-0.41336	-0.12739	-0.11452
87	-1.07253	-0.04341	-0.13892
87.5	-1.92702	-0.01192	-0.19994
88	-2.7693	0.00908	-0.52951
88.5	-3.36744	-0.00142	-0.32197
89	-3.69703	-0.05391	-0.27313
89.5	-3.70923	-0.08541	-0.38297
90	-3.62378	-0.14839	-0.43178
90.5	-3.51391	-0.22188	-0.55384
91	-3.58715	-0.25338	-0.56603
91.5	-3.75804	-0.17989	-0.01669
92	-3.89231	-0.03292	-0.2242
92.5	-4.03879	0.04057	-0.12652
93	-4.09983	-0.06441	-0.41947
93.5	-4.0632	-0.26388	-0.45608
94	-4.01437	-0.31637	-0.24854
94.5	-4.06319	-0.23238	-0.06542
95	-4.06319	-0.03292	-0.49265
95.5	-3.92891	0.11405	-0.18746
96	-3.81904	0.20853	-0.41937
96.5	-3.94111	0.22953	-0.52922
97	-4.23407	0.17704	-0.67569
97.5	-4.47821	0.06156	-0.28504
98	-4.4782	-0.02243	-0.2362
98.5	-4.16082	-0.03293	0.05679
99	-3.7946	-0.08542	0.0568
99.5	-3.61149	-0.14841	-0.39484
100	-3.68473	-0.26389	-0.30937
100.5	-3.75797	-0.28488	-0.2117
101	-3.75796	-0.22189	-2.34791
101.5	-3.6603	-0.14841	-4.2644
102	-3.62368	-0.16941	-4.06907
102.5	-3.74575	-0.24289	-4.25216
103	-3.94105	-0.23239	-4.58173
103.5	-4.06312	-0.11692	-4.30095
104	-3.97767	-0.06443	-4.16666
104.5	-3.81897	-0.16941	-4.39857
105	-3.62365	-0.2429	-3.76379
105.5	-3.5382	-0.28489	-4.28868
106	-3.61144	-0.2429	-3.76376
106.5	-3.75792	-0.13792	-4.37409
107	-3.91661	-0.05393	-4.5938
107.5	-4.07529	0.05105	-4.08109
108	-4.22177	0.09304	-4.3008
108.5	-4.31943	0.08254	-4.45947
109	-4.31942	-0.01194	-4.23973
109.5	-4.25838	-0.10643	-3.99557
110	-4.17293	-0.16941	-4.60591
110.5	-4.08748	-0.11693	-3.78802
111	-4.02644	-0.09593	-4.39835
111.5	-4.05085	-0.06444	-4.38613
112	-4.20954	-0.05394	-4.3739
112.5	-4.3316	-0.05394	-4.52037
113	-4.35601	-0.03294	-4.49594
113.5	-4.36821	0.01955	-3.95881
114	-4.31938	0.10353	-4.1419
114.5	-4.29496	0.12453	-4.23954
115	-4.20951	0.08253	-4.34939
115.5	-4.09964	-0.04344	-4.28833
116	-4.0264	-0.11693	-4.22728
116.5	-4.00198	-0.13793	-4.03195
117	-4.07522	-0.06444	-1.85908
117.5	-4.11183	0.00904	-3.1286
118	-4.063	-0.00146	-4.23942
118.5	-3.97755	-0.01195	-4.32485
119	-3.87989	-0.00146	-4.49573
119.5	-3.77002	0.11402	-4.54454
120	-3.66015	0.18751	-4.3248
120.5	-3.67236	0.198	-4.01961
121	-3.74559	0.10352	-4.33697
121.5	-3.7578	-0.01196	-4.62993
122	-3.77	-0.08544	-4.16604
122.5	-3.64793	-0.09594	-3.61671
123	-3.45261	-0.08545	-4.58105
123.5	-3.40378	-0.05395	-4.41013
124	-3.50143	0.03003	-4.22701
124.5	-3.68453	0.04053	-4.44672
125	-3.83101	-0.03296	-3.95842
125.5	-3.90425	-0.16943	-3.86074
126	-3.85542	-0.24292	-3.8119
126.5	-3.79438	-0.22192	-4.22692
127	-3.8432	-0.19043	-3.29917
127.5	-3.8432	-0.17993	-3.93392
128	-3.61126	-0.21143	-4.25128
128.5	-3.37932	-0.17994	-3.38457
129	-3.30608	-0.11695	-4.06814
129.5	-3.3549	-0.01197	-1.00416
130	-3.45255	0.05102	-0.38159
130.5	-3.62345	0.04052	-1.2971
131	-3.7211	-0.01197	-4.1169
131.5	-3.81875	-0.02247	-3.53095
132	-4.01406	-0.03297	-4.36101
132.5	-4.24599	-0.04347	-4.29996
133	-4.39247	-0.02247	-3.66518
133.5	-4.4535	0.03002	-4.15344
134	-4.36805	0.08251	-4.33653
134.5	-4.20935	0.05101	-4.19003
135	-4.02624	-0.00148	-4.40974
135.5	-3.91638	-0.04347	-4.48296
136	-3.87975	-0.11696	-3.28665
136.5	-3.98961	-0.13795	-3.2134
137	-4.11168	-0.08546	-4.18994
137.5	-4.13609	-0.11696	-4.33641
138	-3.9896	-0.16945	-4.36081
138.5	-3.73325	-0.10646	-4.08003
139	-3.61117	-0.05397	-4.2387
139.5	-3.63558	-0.04347	-4.15323
140	-3.75765	-0.11696	-4.25087
140.5	-3.89192	-0.10646	-4.48279
141	-3.97737	-0.05397	-4.5316
141.5	-3.98957	-0.01198	-4.36069
142	-4.00177	-0.10646	-4.4095
142.5	-3.98956	-0.21145	-4.22637
143	-3.98956	-0.15896	-4.17753
143.5	-3.97735	-0.07497	-4.45827
144	-3.72099	-0.03298	-4.48267
144.5	-3.19609	-0.07497	-4.27513
145	-2.59794	0.00901	-3.8967
145.5	-2.39041	0.0615	-4.29951
146	-2.65897	0.13499	-4.61688
146.5	-3.08621	0.17698	-4.37272
147	-3.33034	0.17698	-4.39712
147.5	-3.40358	0.12449	-4.44593
148	-3.48903	0.0195	-4.38488
148.5	-3.56227	-0.12747	-3.98203
149	-3.64771	-0.26394	-4.6534
149.5	-3.64771	-0.26394	-4.36041
150	-3.62329	-0.21145	-3.66459
150.5	-3.63549	-0.09598	-3.31057
151	-3.75756	0.09299	-4.4214
151.5	-3.85521	0.25046	-4.25048
152	-3.95286	0.16647	-4.3115
152.5	-4.01389	-0.05399	-3.72554
153	-4.0261	-0.16947	-4.31146
153.5	-4.02609	-0.17996	-4.32365
154	-4.08712	-0.16947	-4.04287
154.5	-4.2214	-0.12748	-4.54335
155	-4.18477	-0.05399	-4.42126
155.5	-4.02608	-0.06449	-4.04282
156	-3.94062	-0.06449	-4.44564
156.5	-3.92841	-0.0015	-4.2381
157	-3.98944	0.06149	-4.34795
157.5	-4.07489	-0.012	-4.18924
158	-4.08709	-0.11698	-4.07936
158.5	-3.98943	-0.14848	-4.61645
159	-3.95281	-0.054	-4.12815
159.5	-3.91618	0.09298	-4.50655
160	-3.97721	0.11397	-2.63886
160.5	-3.965	0.10347	-3.98162
161	-3.98941	0.04049	-2.34586
161.5	-3.95278	-0.00151	-4.23793
162	-3.90395	-0.0435	-3.12707
162.5	-3.87953	-0.01201	-3.50547
163	-3.87953	-0.0435	-4.12802
163.5	-3.87953	-0.12749	-1.23493
164	-3.79407	-0.27446	-0.60015
164.5	-3.72083	-0.30595	-0.33158
165	-3.59875	-0.13799	-0.53908
165.5	-3.61096	0.09297	-2.23584
166	-3.72081	0.18745	-3.88377
166.5	-3.89171	0.05098	-4.37204
167	-3.83067	-0.096	-4.24995
167.5	-3.56211	-0.17998	-4.53069
168	-3.26914	-0.21148	-4.48185
168.5	-3.18368	-0.17998	-4.33535
169	-3.44003	-0.1065	-3.96912
169.5	-3.73299	-0.03301	-4.24986
170	-3.94051	-0.04351	-4.38412
170.5	-4.06257	-0.03301	-4.43293
171	-4.13581	0.02997	-2.01592
171.5	-4.1236	0.10346	-0.62431
172	-4.16022	0.06147	-1.73513
172.5	-4.11139	-0.04351	-3.87134
173	-4.02593	-0.16949	-4.05443
173.5	-3.98931	-0.1275	-4.33518
174	-3.94048	-0.04351	-4.20088
174.5	-3.90385	-0.01202	-4.6037
175	-3.78178	0.05097	-4.10319
175.5	-3.70853	0.13495	-4.3229
176	-3.74515	0.17694	-4.38392
176.5	-3.87942	0.10345	-4.42052
177	-3.92824	-0.00153	-4.28623
177.5	-3.94045	-0.159	-4.59139
178	-3.96486	-0.23248	-4.56696
178.5	-4.01368	-0.27448	-4.43266
179	-4.03809	-0.28498	-4.54251
179.5	-3.95264	-0.23249	-4.48145
180	-3.87939	-0.138	-4.73778
180.5	-3.79394	-0.11701	-4.46921
181	-3.72069	-0.12751	-4.22506
181.5	-3.7451	-0.09601	-4.09076
182	-3.83055	0.00897	-4.21281
182.5	-3.86716	0.04046	-4.43252
183	-3.80613	-0.10651	-4.0663
183.5	-3.64743	-0.27448	-4.21276
184	-3.46432	-0.25349	-4.44468
184.5	-3.14693	-0.15901	-4.31038
185	-2.63423	-0.08552	-4.12726
185.5	-2.21919	-0.12751	-4.27373
186	-2.14594	-0.14851	-4.38358
186.5	-2.40229	-0.12751	-4.26149
187	-2.75629	-0.09602	-4.40796
187.5	-3.17132	-0.11702	-4.60325
188	-3.46429	-0.14851	-4.34689
188.5	-3.56194	-0.2325	-4.33466
189	-3.54973	-0.27449	-3.01629
189.5	-3.58635	-0.2325	-4.15152
190	-3.59855	-0.06453	-4.22475
190.5	-3.56192	0.07194	-4.07825
191	-3.54971	0.08244	-4.17588
191.5	-3.51309	0.04045	-4.45663
192	-3.52529	-0.00154	-4.40778
192.5	-3.53749	-0.00154	-3.99273
193	-3.48866	-0.07503	-4.39554
193.5	-3.43983	-0.15902	-4.02931
194	-3.43983	-0.12752	-3.62647
194.5	-3.51306	-0.02254	-4.45653
195	-3.63513	0.05094	-4.2612
195.5	-3.73278	0.00895	-3.7729
196	-3.67174	-0.07504	-4.11468
196.5	-3.56188	-0.08553	-4.37101
197	-3.54966	-0.10653	-4.40761
197.5	-3.67173	-0.2535	-3.95594
198	-3.74497	-0.36898	-4.1024
198.5	-3.67172	-0.33749	-4.26108
199	-3.53744	-0.23251	-4.1634
199.5	-3.51302	-0.14853	-4.3587
200	-3.59847	-0.14853	-4.29765
200.5	-3.81819	-0.21152	-4.5906
201	-3.98908	-0.19052	-4.2732
201.5	-4.06232	-0.13803	-4.62719
202	-4.05011	-0.10654	-4.56613
202.5	-4.0379	-0.01205	-4.3708
203	-4.0379	0.06143	-4.54169
203.5	-3.91582	0.05093	-4.39518
204	-3.69609	-0.03305	-4.38296
204.5	-3.45195	-0.04355	-4.15101
205	-3.30546	-0.03305	-4.23644
205.5	-3.32987	0.01944	-4.07773
206	-3.50076	0.07193	-4.45613
206.5	-3.68386	0.08242	-4.0899
207	-3.80593	0.10342	-4.2852
207.5	-3.928	0.08242	-4.56595
208	-3.97682	0.00893	-4.39503
208.5	-3.92799	-0.11704	-4.26074
209	-3.85474	-0.15904	-4.08982
209.5	-3.7815	-0.16953	-4.21187
210	-3.81811	-0.12754	-4.19965
210.5	-3.9768	-0.16954	-3.22307
211	-4.07445	-0.25352	-2.90567
211.5	-4.03783	-0.28501	-4.45594
212	-3.97679	-0.25352	-4.72448
212.5	-3.85471	-0.19053	-4.46812
213	-3.81809	-0.15904	-3.84554
213.5	-3.81808	-0.05406	-3.88215
214	-3.84249	0.09291	-3.85771
214.5	-3.78146	0.28188	-4.12625
215	-3.67159	0.34486	-4.08961
215.5	-3.59834	0.29237	-4.07739
216	-3.5373	0.1664	-4.23606
216.5	-3.69599	0.07191	-4.76095
217	-3.95233	-0.00157	-4.44355
217.5	-4.15985	-0.11705	-4.16277
218	-4.06219	-0.14855	-4.28482
218.5	-3.80584	-0.11705	-4.28481
219	-3.56169	-0.00158	-4.28479
219.5	-3.51286	0.06141	-4.02842
220	-3.5861	-0.04357	-4.32138
220.5	-3.63492	-0.13805	-4.44343
221	-3.7692	-0.10656	-4.27251
221.5	-3.7814	-0.06457	-4.35795
222	-3.76919	-0.14855	-4.10158
222.5	-3.78139	-0.19055	-2.50244
223	-3.89125	-0.12756	-4.26024
223.5	-3.86683	-0.04357	-2.17282
224	-3.50062	-0.15905	-3.17378
224.5	-2.87805	-0.20105	-3.73528
225	-2.17004	-0.03308	-4.16251
225.5	-1.49865	0.12439	-3.36904
226	-0.88829	0.1034	-3.97937
226.5	-0.46104	-0.00159	-4.02818
227	-0.19249	-0.04358	-3.94272
227.5	-0.25352	-0.01208	-4.22346
228	-0.36338	0.0719	-3.86944
228.5	-0.49765	0.12439	-3.66191
229	-0.63192	0.10339	-3.36892
229.5	-0.70516	0.01941	-4.26002
230	-0.69295	-0.04358	-4.26
230.5	-0.47322	-0.18006	-4.44309
231	-0.22907	-0.29554	-4.27217
231.5	-0.11921	-0.33753	-3.75946
232	-0.20465	-0.39002	-3.38102
232.5	-0.21686	-0.39002	-4.51626
233	-0.1314	-0.44251	-4.43079
233.5	-0.1436	-0.43201	-1.20812
234	-0.59526	-0.37952	-0.12168
234.5	-1.40092	-0.27454	-0.25594
235	-2.21879	-0.27455	-0.06061
235.5	-2.92679	-0.29554	-2.25786
236	-3.48831	-0.24305	-4.12552
236.5	-3.8179	-0.21156	-4.24757
237	-3.87893	-0.14857	-4.39404
237.5	-3.86672	-0.14857	-4.07664
238	-3.78126	-0.13807	-4.04
238.5	-3.73243	-0.12758	-4.43061
239	-3.72022	-0.11708	-4.14983
239.5	-3.79346	-0.21156	-4.14981
240	-3.8667	-0.24306	-4.14979
240.5	-3.84228	-0.20107	-4.13757
241	-3.85448	-0.10658	-4.25962
241.5	-3.83006	-0.06459	-4.35726
242	-3.89109	-0.06459	-4.02765
242.5	-3.87888	-0.0541	-4.44268
243	-3.90329	-0.07509	-4.69901
243.5	-3.9155	-0.09609	-4.17409
244	-3.91549	-0.14858	-4.406
244.5	-3.97652	-0.21157	-4.19847
245	-4.01314	-0.22207	-3.97872
245.5	-4.02534	-0.13808	-4.25947
246	-4.01313	-0.0331	-2.89226
246.5	-3.98871	0.05088	-0.51187
247	-3.86664	0.12437	-0.30434
247.5	-3.81781	0.18735	-0.31653
248	-3.8056	0.37632	-0.3043
248.5	-3.80559	0.50229	-0.18222
249	-3.80559	0.40781	-0.15778
249.5	-3.83	0.16636	-0.41412
250	-3.87882	-0.0646	-0.18216
250.5	-3.89103	-0.27456	-0.2676
251	-3.81778	-0.32705	-0.31641
251.5	-3.78115	-0.24307	-0.29198
252	-3.79336	-0.0646	-0.25534
252.5	-3.7079	0.11386	-0.26753
253	-3.7079	0.17685	-0.38958
253.5	-3.84217	0.14535	-0.26749
254	-3.97645	0.07187	-0.18203
254.5	-3.76892	0.01938	-0.57264
255	-3.2074	-0.07511	-0.31627
255.5	-2.49938	-0.07511	-0.05991
256	-2.08434	-0.1276	-0.37727
256.5	-2.15758	-0.18009	-0.19415
257	-2.46275	-0.23258	0.06222
257.5	-2.87779	-0.22208	-0.40163
258	-3.30503	-0.15909	-0.32838
258.5	-3.72006	-0.09611	-0.15746
259	-4.03744	0.04037	-0.35276
259.5	-4.25716	0.17684	-3.34346
260	-4.29378	0.29232	-4.75946
260.5	-4.29378	0.19784	-3.35563
261	-4.22053	-0.00163	-3.28237
261.5	-4.09846	-0.1486	-4.13685
262	-3.97638	-0.25358	-4.63732
262.5	-3.85431	-0.34806	-4.06357
263	-3.8421	-0.34806	-4.08797
263.5	-3.90313	-0.27458	-4.40534
264	-3.97637	-0.20109	-4.33208
264.5	-3.92753	-0.1486	-4.35647
265	-3.8787	-0.1486	-4.14894
265.5	-3.81766	-0.1696	-4.06347
266	-3.80545	-0.14861	-4.51511
266.5	-3.75662	-0.07512	-3.97799
267	-3.58572	0.00886	-3.8559
267.5	-3.41481	0.06135	-3.80705
268	-3.4026	-0.00164	-4.51505
268.5	-3.43922	-0.10662	-3.86806
269	-3.37818	-0.12761	-4.09997
269.5	-3.32935	-0.10662	-3.92906
270	-3.39038	-0.01214	-4.2098
270.5	-3.58569	0.02986	-4.01447
271	-3.68334	0.05085	-4.17315
271.5	-3.59789	-0.00164	-4.50272
272	-3.53685	-0.08562	-4.25856
272.5	-3.54905	-0.09612	-4.51489
273	-3.62229	-0.01214	-4.05101
273.5	-3.78098	0.09284	-4.40499
274	-3.96408	0.09284	-4.66132
274.5	-3.95187	0.15583	-4.53924
275	-3.87862	0.18732	-4.36832
275.5	-3.84199	0.19782	-4.40492
276	-3.8664	0.20832	-4.52698
276.5	-3.84199	0.2923	-4.00206
277	-3.78095	0.32379	-3.72128
277.5	-3.76874	0.31329	-4.00202
278	-3.75652	0.2923	-4.49029
278.5	-3.79314	0.20831	-4.79545
279	-3.81755	0.16632	-4.19729
279.5	-3.85417	0.10333	-4.6001
280	-3.90299	-0.00165	-4.0996
280.5	-3.98844	-0.08563	-4.17282
281	-4.07388	-0.11713	-4.41694
281.5	-4.08609	-0.08564	-4.42913
282	-4.03725	-0.01215	-4.38029
282.5	-3.92739	-0.04364	-4.24599
283	-3.80531	-0.12763	-4.39246
283.5	-3.70765	-0.16962	-4.40465
284	-3.65882	-0.12763	-4.22153
284.5	-3.6344	0.02984	-3.95296
285	-3.76867	0.16631	-4.25812
285.5	-3.86633	0.12432	-1.93876
286	-3.8297	-0.05415	-0.43728
286.5	-3.81749	-0.21162	-0.05884
287	-3.80528	-0.3061	-0.22973
287.5	-3.87852	-0.3376	-0.15647
288	-3.98838	-0.3061	-0.26631
288.5	-4.04941	-0.22212	0.02667
289	-3.97616	-0.14863	-0.35173
289.5	-3.8785	-0.08565	-0.52261
290	-3.74422	-0.02266	-0.3639
290.5	-3.65877	0.00884	-0.31506
291	-3.7198	-0.03316	-0.00986
291.5	-3.9029	-0.11714	-0.31502
292	-4.086	-0.15913	-0.41266
292.5	-4.18365	-0.16963	-0.24174
293	-4.15923	-0.18013	-0.09524
293.5	-4.02495	-0.22212	-0.47364
294	-3.96391	-0.23262	-0.27831
294.5	-4.03715	-0.18013	-0.02195
295	-4.07377	-0.13814	-0.20504
295.5	-4.03714	-0.12764	0.01471
296	-3.91507	-0.14864	-2.81731
296.5	-3.82962	-0.08565	-4.00137
297	-3.76858	-0.05416	-4.4164
297.5	-3.76857	-0.02267	-4.02575
298	-3.80519	0.04032	-3.84263
298.5	-3.92726	0.00883	-4.6849
299	-3.98829	-0.04366	-4.66047
299.5	-3.96387	-0.08566	-4.34307
300	-3.93945	-0.12765	-4.30643
300.5	-3.87841	-0.18014	-2.49977
301	-3.78075	-0.18014	-3.76929
301.5	-3.74413	-0.23263	-3.92796
302	-3.81736	-0.24313	-4.18429
302.5	-3.8906	-0.19064	-4.35517
303	-3.93943	-0.05417	-4.13543
303.5	-3.93942	0.08231	-4.37955
304	-3.93942	0.0928	-4.23305
304.5	-3.95162	-0.04367	-4.526
305	-3.90279	-0.16965	-4.36729
305.5	-3.87837	-0.13815	-4.15976
306	-3.87837	-0.04367	-4.36726
306.5	-3.97602	0.04031	-3.94
307	-4.04926	0.02981	-2.87797
307.5	-4.09808	-0.01218	-3.93996
308	-4.06146	-0.05417	-3.98877
308.5	-4.02483	-0.06467	-4.69676
309	-3.92717	-0.06467	-4.36716
309.5	-3.79289	-0.12766	-4.28169
310	-3.59757	-0.23264	-4.46478
310.5	-3.54874	-0.30613	-4.36711
311	-3.62198	-0.23264	-4.28164
311.5	-3.70742	-0.22215	-4.68445
312	-3.79287	-0.10667	-4.36705
312.5	-3.82949	-0.00169	-3.76889
313	-3.82948	0.0613	-4.07405
313.5	-3.70741	0.0403	-4.59894
314	-3.68299	0.0718	-3.26835
314.5	-3.71961	0.15578	-4.56228
315	-3.76843	0.19777	-4.0984
315.5	-3.85388	0.11379	-4.52563
316	-3.89049	-0.09618	-4.1594
316.5	-3.80504	-0.28514	-4.24483
317	-3.73179	-0.42162	-4.28143
317.5	-3.73179	-0.39012	-4.4279
318	-3.74399	-0.32713	-4.31802
318.5	-3.68295	-0.13817	-4.1349
319	-3.56088	0.0088	-4.13488
319.5	-3.41439	0.0088	-4.18369
320	-3.32894	0.0193	-4.48885
320.5	-3.34114	0.04029	-4.07379
321	-3.41438	0.0088	-2.40141
321.5	-3.51203	-0.11718	-4.26907
322	-3.71955	-0.21166	-4.39113
322.5	-3.9881	-0.27465	-4.50097
323	-4.19561	-0.26415	-4.28123
323.5	-4.23223	-0.22216	-4.15914
324	-4.22002	-0.16967	-4.01264
324.5	-4.14677	-0.15917	-4.36663
325	-4.09794	-0.19067	-4.37882
325.5	-4.00028	-0.16967	-4.14686
326	-3.90262	-0.09619	-4.34216
326.5	-3.84158	0.08228	-4.42759
327	-3.79275	0.10327	-4.51302
327.5	-3.74391	0.09278	-4.30549
328	-3.7317	-0.01221	-4.06133
328.5	-3.76832	-0.08569	-4.28104
329	-3.81714	-0.10669	-3.96364
329.5	-3.93921	-0.12769	-4.14673
330	-3.97583	-0.16968	-4.26878
330.5	-3.98803	-0.29566	-4.29318
331	-4.01244	-0.42163	-3.92695
331.5	-4.08568	-0.44263	-4.26873
332	-4.17112	-0.30616	-4.26871
332.5	-4.14671	-0.19068	-4.39077
333	-3.98801	-0.0962	-4.23206
333.5	-3.89035	-0.0542	-3.85362
334	-3.93917	-0.0647	-3.59726
334.5	-3.95138	-0.1067	-3.79255
335	-4.02462	-0.1067	-4.26861
335.5	-3.89033	-0.0962	-4.04887
336	-3.64619	-0.26417	-4.19533
336.5	-3.42646	-0.39015	-4.76905
337	-3.31659	-0.36915	-4.45165
337.5	-3.341	-0.13819	-4.47604
338	-3.58514	0.08227	-4.50044
338.5	-3.91472	0.16625	-3.85345
339	-4.049	0.10326	-3.32853
339.5	-4.01237	-0.02272	-3.87783
340	-3.84147	-0.07521	-4.09754
340.5	-3.80484	-0.01222	-2.8402
341	-3.89029	0.07176	-4.37827
341.5	-4.0856	0.06126	-4.47591
342	-4.21987	0.02977	-3.85333
342.5	-4.36635	-0.06471	-2.59599
343	-4.53725	-0.20119	-2.65701
343.5	-4.54945	-0.26418	-3.82887
344	-4.43958	-0.24318	-4.01195
344.5	-4.35413	-0.29567	-0.88694
345	-4.37854	-0.32717	-0.1667
345.5	-4.25646	-0.30617	-0.61835
346	-4.08556	-0.28518	-0.36198
346.5	-3.91466	-0.27468	-0.33755
347	-3.75596	-0.21169	-2.47376
347.5	-3.57285	-0.11721	-4.2926
348	-3.45078	-0.02273	-4.57334
348.5	-3.56064	0.11375	-4.3536
349	-3.79257	0.19773	-4.36579
349.5	-3.92684	0.21873	-4.17046
350	-3.70711	0.21873	-3.99954
350.5	-3.10896	0.21872	-4.34132
351	-2.32771	0.19773	-4.1582
351.5	-1.69294	0.14524	-4.17039
352	-1.15582	0.15573	-4.13375
352.5	-0.66754	0.16623	-4.31684
353	-0.54546	0.20822	-4.36565
353.5	-0.97271	0.17673	-4.12149
354	-1.74175	0.10324	-4.42665
354.5	-2.29106	0.05075	-4.23132
355	-2.46195	0.06125	-4.744
355.5	-2.44974	0.09274	-4.43881
356	-2.54739	0.06125	-4.26789
356.5	-2.79153	0.01925	-4.49981
357	-2.99905	0.02975	-4.53641
357.5	-3.13332	0.04025	-4.29225
358	-3.15773	0.07174	-4.32886
358.5	-3.1089	0.06124	-3.88939
359	-3.13331	-0.00174	-4.60958
359.5	-3.35303	-0.13822	-4.8415
360	-3.70703	-0.2642	-4.42645
360.5	-4.04882	-0.21171	-3.74283
361	-4.21972	-0.01224	-3.66958
361.5	-4.1953	0.14523	-4.30432
362	-4.12205	0.09273	-4.37755
362.5	-4.09763	-0.00175	-3.76718
363	-4.0488	-0.00175	-2.92488
363.5	-3.91452	0.07174	-1.70416
364	-3.78024	0.11373	-0.31254
364.5	-3.64596	0.11373	-2.82717
365	-3.58492	0.10323	-4.31641
365.5	-3.54829	0.04024	-4.37743
366	-3.5727	0.00875	-4.24313
366.5	-3.64594	-0.05424	-4.26753
367	-3.68256	-0.09624	-4.34076
367.5	-3.68255	-0.07524	-4.36515
368	-3.68255	-0.03325	-4.07217
368.5	-3.70696	0.05073	-4.30408
369	-3.74358	0.04024	-4.15758
369.5	-3.76799	-0.07524	-3.81577
370	-3.84123	-0.20122	-4.35286
370.5	-4.04874	-0.22222	-4.15753
371	-4.09757	-0.16973	-3.7913
371.5	-3.91446	-0.01226	-4.47488
372	-3.70693	0.09272	-4.30396
372.5	-3.69472	0.11372	-3.47387
373	-3.76796	0.15571	-4.05979
373.5	-3.89003	0.2082	-4.4504
374	-3.98768	0.22919	-4.36493
374.5	-3.97547	0.05073	-3.8278
375	-3.89001	-0.13824	-4.29165
375.5	-3.80456	-0.15923	-3.81556
376	-3.79235	0.01923	-4.19396
376.5	-3.84117	0.1662	-3.90098
377	-3.93882	0.1767	-4.32821
377.5	-4.0731	0.14521	-4.64557
378	-4.20737	0.14521	-4.41362
378.5	-4.2684	0.29218	-4.20609
379	-4.25619	0.28168	-4.24269
379.5	-4.18295	0.1662	-3.51025
380	-4.02425	0.04022	-3.8032
380.5	-3.7801	0.00873	-3.44918
381	-3.35285	0.02972	-3.42475
381.5	-2.75471	0.06122	-4.03508
382	-2.18097	0.06122	-4.07169
382.5	-1.92462	0.05072	-4.31581
383	-2.0711	0.00872	-3.41247
383.5	-2.48614	-0.07526	-3.42466
384	-2.98662	-0.07526	-4.30355
384.5	-3.35283	-0.10676	-3.63215
385	-3.57255	-0.15925	-4.2669
385.5	-3.69462	-0.18024	-3.9617
386	-3.82889	-0.18024	-4.57204
386.5	-3.80447	-0.21174	-4.43774
387	-3.76784	-0.19074	-4.3889
387.5	-3.78005	-0.08576	-4.66964
388	-3.78004	0.07171	-4.24238
388.5	-3.68238	0.17669	-3.99822
389	-3.5481	0.0927	-4.1569
389.5	-3.53589	-0.05427	-4.40102
390	-3.53589	-0.12776	-4.16907
390.5	-3.47485	-0.08577	-4.38878
391	-3.16967	-0.07527	-4.35214
391.5	-2.79125	-0.19075	-4.58406
392	-2.58372	-0.27473	-4.52301
392.5	-2.74241	-0.25374	-4.21781
393	-3.01096	-0.22224	-4.60842
393.5	-3.23068	-0.20125	-4.27881
394	-3.40158	-0.14876	-4.32762
394.5	-3.58468	-0.10677	-3.77829
395	-3.74337	-0.07527	-3.91255
395.5	-3.76778	-0.06478	-4.15667
396	-3.85322	-0.08577	-4.2299
396.5	-3.95087	-0.08577	-4.4252
397	-4.04853	-0.06478	-3.98572
397.5	-4.07294	-0.03328	-4.60827
398	-4.15838	-0.03329	-4.40073
398.5	-4.21941	-0.05428	-4.18099
399	-4.09734	-0.04378	-4.21759
399.5	-3.90202	0.0612	-4.49833
400	-3.67008	0.06119	-4.19314
400.5	-3.45035	-0.03329	-3.92457
401	-3.0231	-0.18026	-4.27856
401.5	-2.47378	-0.22225	-4.0344
402	-2.03432	-0.15927	-2.97237
402.5	-2.07094	-0.08578	-3.98554
403	-2.42494	-0.10678	-4.51042
403.5	-2.80336	-0.15927	-4.00992
404	-3.13294	-0.11728	-2.56947
404.5	-3.34046	-0.04379	-0.45764
405	-3.51135	0.04019	-0.16465
405.5	-3.56017	0.06119	-0.12801
406	-3.64562	0.11368	-2.36188
406.5	-3.65782	0.13467	-3.94878
407	-3.71885	0.02969	-4.26614
407.5	-3.77989	-0.24326	-4.20509
408	-3.90195	-0.71567	-3.80224
408.5	-4.07285	-1.34555	-2.74021
409	-4.23153	-2.02793	-4.37594
409.5	-4.31698	-2.54233	-4.10737
410	-4.07283	-2.81528	-0.59172
410.5	-3.74324	-2.94126	-0.32315
411	-3.47468	-3.14072	-0.34755
411.5	-3.43806	-3.31919	-0.31091
412	-3.51129	-3.38218	-0.33531
412.5	-3.65777	-3.30869	-0.31088
413	-3.69439	-3.20371	-0.61604
413.5	-3.70659	-3.00425	-0.18877
414	-3.77983	-2.7523	0.17746
414.5	-3.81645	-2.7523	-0.22536
415	-3.85307	-2.96226	-0.37183
415.5	-3.84086	-3.3087	-0.38402
416	-3.85306	-3.64464	-0.29855
416.5	-3.81643	-3.87559	-0.26191
417	-3.82864	-3.63414	-0.23748
417.5	-3.96291	-2.87828	-0.17643
418	-4.24367	-1.93346	-0.27407
418.5	-4.4878	-1.45055	-0.24964
419	-4.47559	-1.39806	-0.213
419.5	-4.30469	-1.37706	-0.29843
420	-3.99951	-1.35607	-0.05427
420.5	-3.65771	-1.40856	-0.18853
421	-3.46239	-1.74449	-0.26176
421.5	-3.59667	-2.2694	-0.57912
422	-3.77977	-2.76281	-0.2251
422.5	-3.87742	-3.03576	-0.22509
423	-3.84079	-3.20373	-0.103
423.5	-3.853	-3.27721	-0.00532
424	-3.90182	-3.17223	-0.29828
424.5	-3.7065	-2.78381	-0.04191
425	-3.14498	-2.24841	-0.38369
425.5	-2.3271	-1.85998	-0.33485
426	-1.50923	-1.50305	-0.29821
426.5	-0.81342	-1.15661	-0.35923
427	-0.38617	-0.82067	-0.04183
427.5	-0.19085	-0.54773	0.10468
428	-0.16644	-0.29577	0.12911
428.5	-0.19085	-0.11731	-0.00515
429	-0.27629	-0.05432	-0.2859
429.5	-0.33732	-0.09631	-0.11498
430	-0.32511	-0.25378	-0.29807
430.5	-0.3129	-0.40076	-0.0295
431	-0.30069	-0.48474	-0.4079
431.5	-0.23965	-0.44275	-3.71599
432	-0.1542	-0.31677	-4.43619
432.5	-0.19081	-0.1698	-4.36293
433	-0.33729	-0.12781	-4.80236
433.5	-0.41053	-0.1593	-4.44834
434	-0.32508	-0.1698	-4.30184
434.5	-0.26404	-0.06482	-4.37507
435	-0.30066	-0.03333	-4.24077
435.5	-0.34948	-0.14881	-4.05765
436	-0.37389	-0.16981	-4.04542
436.5	-0.41051	-0.03333	-4.04541
437	-0.37388	0.16613	-4.02098
437.5	-0.2396	0.3551	-4.25289
438	-0.15415	0.18713	-4.42377
438.5	-0.20297	-0.49525	-4.21624
439	-0.31283	-1.44007	-4.30167
439.5	-0.31283	-2.26942	-4.19179
440	-0.25179	-2.87831	-3.45935
440.5	-0.16634	-3.15126	-3.95982
441	-0.1053	-3.26674	-4.21615
441.5	-0.06867	-3.40321	-4.17951
442	-0.05646	-3.50819	-4.30157
442.5	-0.10528	-3.59218	-4.15507
443	-0.1419	-3.62367	-4.36257
443.5	-0.10528	-3.60268	-4.26489
444	-0.10527	-3.38222	-4.14281
444.5	-0.1663	-2.81532	-4.3259
445	-0.28837	-2.03847	-4.38691
445.5	-0.47147	-1.3141	-4.14276
446	-0.56912	-0.7997	-4.52116
446.5	-0.50808	-0.53725	-4.15493
447	-0.27615	-0.46376	-4.64319
447.5	-0.05641	-0.41127	-2.39708
448	0.00462	-0.36928	-1.11533
448.5	-0.0442	-0.31679	-3.91072
449	-0.11744	-0.32729	-3.60553
449.5	-0.19068	-0.37978	-4.09379
450	-0.22729	-0.47427	-4.10598
450.5	-0.2395	-0.52676	-3.9961
451	-0.20287	-0.41128	-4.41112
451.5	-0.38597	-0.21182	-4.33786
452	-0.93528	-0.00186	-4.28902
452.5	-1.78977	0.11362	-1.76214
453	-2.63205	-0.01235	-0.3339
453.5	-3.34006	-0.48477	-0.27285
454	-3.74289	-1.19864	-0.2118
454.5	-3.93819	-1.9545	-0.12633
455	-4.08467	-2.59488	-0.30942
455.5	-4.14571	-3.06729	-1.28597
456	-4.07246	-3.34024	-3.9837
456.5	-3.98701	-3.35074	-4.24004
457	-3.69403	-3.10928	-4.25222
457.5	-3.18133	-2.90982	-4.43531
458	-2.7907	-2.83634	-4.33764
458.5	-2.68084	-2.85733	-4.56956
459	-2.88835	-2.96231	-4.10567
459.5	-3.18132	-3.16178	-4.67939
460	-3.37663	-3.32975	-4.59392
460.5	-3.53531	-3.43473	-4.44742
461	-3.70621	-3.46622	-4.33754
461.5	-3.76724	-3.52921	-3.91027
462	-3.71841	-3.67618	-4.42295
462.5	-3.63295	-3.87565	-4.32528
463	-3.5475	-4.04362	-1.89606
463.5	-3.60853	-3.99113	-4.00786
464	-3.69398	-3.76017	-4.05667
464.5	-3.82825	-3.51872	-4.53273
465	-3.97473	-3.44523	-4.22754
465.5	-4.08459	-3.50822	-4.32518
466	-4.09679	-3.45573	-4.38619
466.5	-3.98692	-3.29826	-4.09321
467	-3.86485	-3.26677	-4.15423
467.5	-3.7794	-3.42424	-4.32511
468	-3.77939	-3.60271	-3.88564
468.5	-3.7916	-3.73918	-3.93445
469	-3.87704	-3.79167	-4.43492
469.5	-3.96249	-3.79167	-4.14193
470	-3.93807	-3.6237	-4.19074
470.5	-3.85262	-3.1303	-4.39825
471	-3.77937	-2.38494	-4.15409
471.5	-3.79157	-1.58708	-4.27614
472	-3.73053	-1.06218	-4.12964
472.5	-3.74274	-0.77874	-3.94652
473	-3.74273	-0.68425	-3.54367
473.5	-3.85259	-0.60027	-2.16426
474	-4.0479	-0.47429	-3.33612
474.5	-4.15776	-0.30633	-4.19059
475	-4.14555	-0.30633	-3.72671
475.5	-4.0723	-0.74725	-4.28821
476	-4.09671	-1.50311	-4.23937
476.5	-4.10891	-2.27996	-4.50791
477	-4.13332	-2.87835	-4.39802
477.5	-4.10891	-3.37176	-4.23932
478	-4.07228	-3.63421	-4.4102
478.5	-4.03566	-3.76019	-4.16604
479	-4.10889	-3.74969	-4.42237
479.5	-4.18213	-3.7287	-2.0786
480	-4.25537	-3.7287	-1.87107
480.5	-4.30419	-3.7287	-4.05611
481	-4.40185	-3.7287	-4.2514
481.5	-4.58495	-3.66571	-3.20158
482	-4.74363	-3.62372	-3.01846
482.5	-4.8657	-3.61322	-3.01844
483	-4.8779	-3.7287	-3.34801
483.5	-4.85349	-3.85468	-4.30015
484	-4.73141	-3.98065	-2.65218
484.5	-4.52389	-3.99115	-3.54328
485	-4.27974	-3.91767	-4.03154
485.5	-4.01118	-3.78119	-3.49441
486	-3.92573	-3.65522	-4.09254
486.5	-3.90131	-3.65522	-3.885
487	-3.82807	-3.66572	-2.44456
487.5	-3.75482	-3.66572	-3.37227
488	-3.82806	-3.61323	-4.09247
488.5	-3.96233	-3.64472	-1.2238
489	-4.16985	-3.67622	-0.46695
489.5	-4.34074	-3.72871	-0.34486
490	-4.4506	-3.7602	-0.13732
490.5	-4.51163	-3.80219	-0.28379
491	-4.48721	-3.86518	0.14347
491.5	-4.49942	-3.81269	-0.07624
492	-4.53603	-3.83369	-0.17388
492.5	-4.45058	-3.7917	-0.02738
493	-4.24306	-3.7707	-0.08839
493.5	-3.95008	-3.7707	-0.21045
494	-3.60828	-3.83369	-0.08836
494.5	-3.55945	-3.91768	-0.41793
495	-3.76697	-3.95967	-1.46772
495.5	-4.03552	-3.86519	-3.82366
496	-4.1942	-3.67622	-4.12882
496.5	-4.24303	-3.50826	-4.31191
497	-4.18199	-3.46627	-4.16541
497.5	-3.90122	-3.60274	-4.21422
498	-3.68149	-3.70772	-3.95785
498.5	-3.59604	-3.73922	-4.18977
499	-3.66928	-3.71822	-1.52862
499.5	-3.73031	-3.71822	-0.21024
500	-3.81575	-3.71822	0.11937
500.5	-3.92561	-3.73922	-1.4187
501	-4.04768	-3.73922	-3.92113
501.5	-4.23078	-3.69723	-3.99435
502	-4.24298	-3.64474	-4.34834
502.5	-4.03546	-3.59225	-4.09198
503	-3.80352	-3.64474	-4.21403
503.5	-3.73028	-3.69723	-4.07973
504	-3.73027	-3.74972	-4.0553
504.5	-3.7791	-3.76022	-3.82335
505	-3.75468	-3.79171	-4.17734
505.5	-3.68143	-3.81271	-3.11531
506	-3.70584	-3.67624	-3.68902
506.5	-3.80349	-3.39279	-2.93217
507	-3.87673	-3.25632	-3.55471
507.5	-3.81569	-3.3508	-4.61671
508	-3.73024	-3.52927	-4.07958
508.5	-3.60817	-3.64475	-3.94529
509	-3.57154	-3.64475	-4.6899
509.5	-3.6814	-3.60275	-4.06732
510	-3.93774	-3.53977	-4.36027
510.5	-4.14526	-3.58176	-4.28701
511	-4.19408	-3.69724	-4.68983
511.5	-4.08422	-3.84421	-4.76305
512	-3.8889	-3.86521	-4.67759
512.5	-3.75462	-3.72874	-4.17708
513	-3.47385	-3.61326	-4.32355
513.5	-3.05881	-3.67625	-4.54326
514	-2.7048	-3.76023	-4.36014
514.5	-2.72921	-3.71824	-3.85963
515	-3.03438	-3.59226	-4.15258
515.5	-3.425	-3.43479	-2.73655
516	-3.71797	-3.35081	-0.46602
516.5	-3.91328	-3.31932	-0.58808
517	-4.01093	-3.4033	-0.34392
517.5	-4.03534	-3.35081	-0.18521
518	-4.01092	-2.93089	-0.18519
518.5	-3.90105	-2.20653	-0.29504
519	-3.74236	-1.38768	-0.16075
519.5	-3.57145	-0.7368	-0.4537
520	-3.41276	-0.32738	-0.20954
520.5	-2.92447	-0.2224	-0.35601
521	-2.16763	-0.2119	-0.05081
521.5	-1.423	-0.16991	-0.0508
522	-0.87368	-0.12792	-0.28271
522.5	-0.5685	-0.19091	-0.31932
523	-0.45863	-0.30638	-0.1484
523.5	-0.36097	-0.53734	-0.46577
524	-0.17786	-1.09374	-0.35589
524.5	-0.05579	-1.8496	-0.18497
525	-0.14123	-2.52147	-0.11171
525.5	-0.6173	-2.98339	0.047
526	-1.32531	-3.37182	-0.28258
526.5	-2.14318	-3.60278	-0.14828
527	-2.85118	-3.66576	-0.09944
527.5	-3.27842	-3.64477	-0.02618
528	-3.53476	-3.67626	-0.23368
528.5	-3.66904	-3.70776	-0.06276
529	-3.68124	-3.74975	-0.11158
529.5	-3.63241	-3.90722	0.07155
530	-3.59578	-4.0437	-0.09933
530.5	-3.62019	-4.06469	-0.22139
531	-3.71785	-3.99121	-0.06268
531.5	-3.75446	-3.77075	-0.23356
532	-3.70563	-3.42432	-0.25796
532.5	-3.70563	-3.21435	-0.05042
533	-3.77886	-3.19336	-0.23351
533.5	-3.8399	-3.20386	-0.31894
534	-3.88872	-3.19336	-0.22127
534.5	-4.05961	-3.11987	-0.40436
535	-4.19389	-2.83643	-0.05033
535.5	-4.19388	-2.25904	-0.09915
536	-4.08402	-1.74463	-0.0503
536.5	-4.02298	-1.74463	-0.01366
537	-3.98635	-2.26954	-0.36765
537.5	-3.87648	-2.90992	-0.34322
538	-3.77882	-3.44532	0.0108
538.5	-3.83985	-3.82325	-0.1967
539	-4.10841	-4.00172	-0.37979
539.5	-4.36475	-4.06471	0.01085
540	-4.45019	-4.00172	-0.40417
540.5	-4.35253	-3.60279	-0.28208
541	-4.20605	-2.83644	-0.19661
541.5	-4.07176	-1.92311	0.12079
542	-3.77879	-1.12525	0.07198
542.5	-3.19285	-0.55836	-0.35525
543	-2.37497	-0.29591	-0.07447
543.5	-1.59372	-0.25392	-0.35522
544	-1.00778	-0.3589	-0.14768
544.5	-0.61715	-0.76832	-0.42843
545	-0.31197	-1.38771	-0.2331
545.5	-0.21431	-1.80763	-1.74675
546	-0.2021	-1.80763	-3.04068
546.5	-0.28754	-1.48219	-4.09047
547	-0.49506	-1.31423	-4.11487
547.5	-0.5683	-1.60817	-4.07823
548	-0.50726	-2.21706	-4.31014
548.5	-0.31194	-2.86794	-4.27351
549	-0.08	-3.27736	-4.16363
549.5	0.0909	-3.50832	-4.35892
550	0.04208	-3.49782	-4.15138
550.5	-0.0922	-3.40334	-4.23682
551	-0.22647	-3.41384	-4.50535
551.5	-0.38516	-3.58181	-4.16354
552	-0.54385	-3.67629	-4.38325
552.5	-0.60488	-3.46633	-4.39544
553	-0.53163	-2.90994	-4.1757
553.5	-0.43397	-2.19607	-4.3832
554	-0.39735	-1.58718	-4.02918
554.5	-0.39734	-1.34573	-3.95592
555	-0.37292	-1.67117	-3.89487
555.5	-0.37292	-2.25906	-4.1512
556	-0.33629	-2.73147	-4.10235
556.5	-0.29967	-2.75247	-4.23661
557	-0.29966	-2.28006	-4.2488
557.5	-0.29966	-1.77615	-4.15113
558	-0.36069	-1.59769	-4.04125
558.5	-0.51938	-1.81815	-4.02902
559	-0.72689	-2.21707	-4.1877
559.5	-0.72689	-2.52152	-4.0412
560	-0.61702	-2.50052	-4.2487
560.5	-0.43391	-2.30106	-3.65054
561	-0.26301	-2.26956	-3.74818
561.5	-0.05549	-2.34305	-3.98009
562	0.06659	-2.44803	-4.40732
562.5	0.06659	-2.71048	-4.44392
563	0.01777	-3.03592	-2.78375
563.5	-0.06768	-3.27738	-0.37895
564	-0.14092	-3.49784	-0.06155
564.5	-0.22636	-3.64481	-0.45216
565	-0.27519	-3.7393	-0.25683
565.5	-0.36063	-3.53983	-0.37888
566	-0.55594	-2.99394	-1.68502
566.5	-1.04422	-2.47953	-4.1264
567	-1.74001	-2.41654	-4.17522
567.5	-2.50905	-2.72099	-4.23623
568	-3.21706	-3.16191	-2.58827
568.5	-3.6443	-3.50834	-0.52526
569	-3.8274	-3.7183	-0.58628
569.5	-3.87622	-3.81279	0.15837
570	-4.03491	-3.78129	-0.03693
570.5	-4.21801	-3.7498	-0.5374
571	-4.29125	-3.7288	0.01193
571.5	-4.14476	-3.7813	-0.30543
572	-3.97386	-3.88628	-0.47631
572.5	-3.92503	-4.01225	-0.28098
573	-3.98606	-4.05425	0.02421
573.5	-4.08371	-4.03325	-0.23212
574	-4.10812	-3.91777	-0.29314
574.5	-4.12032	-3.7918	-0.20767
575	-4.04708	-3.74981	-0.37855
575.5	-4.02266	-3.7918	-0.35412
576	-4.1081	-3.83379	0.0121
576.5	-4.30341	-3.7708	-3.23495
577	-4.37665	-3.8023	-4.19929
577.5	-4.21796	-3.93877	-4.39458
578	-3.99822	-4.06475	-4.2725
578.5	-3.85174	-3.93878	-4.05275
579	-3.8029	-3.58184	-3.58887
579.5	-3.81511	-3.22491	-4.43114
580	-3.86393	-3.05694	-4.07711
580.5	-3.77848	-3.06744	-3.95503
581	-3.68082	-3.08844	-4.24798
581.5	-3.63199	-3.17242	-3.24698
582	-3.60757	-3.2879	-0.41494
582.5	-3.46108	-3.41388	-0.46375
583	-3.1559	-3.50836	-2.24596
583.5	-2.91175	-3.62384	-4.32114
584	-2.86292	-3.65533	-4.16243
584.5	-3.03382	-3.60284	-4.41876
585	-3.22913	-3.52936	-4.1746
585.5	-3.48547	-3.55036	-3.91823
586	-3.70519	-3.63434	-4.33326
586.5	-3.9005	-3.70783	-4.17455
587	-3.94932	-3.73932	-4.41867
587.5	-4.04698	-3.67633	-4.19893
588	-4.07139	-3.72883	-4.3454
588.5	-4.04697	-3.8653	-4.36979
589	-4.04696	-3.95978	-4.28433
589.5	-4.04696	-3.95978	-4.6139
590	-3.99813	-3.91779	-4.06457
590.5	-3.88826	-3.94929	-4.55283
591	-3.90046	-4.00178	-4.54061
591.5	-3.94929	-4.06477	-4.41852
592	-4.09577	-4.02278	-4.72368
592.5	-4.24225	-3.95979	-4.49173
593	-4.3399	-3.85481	-4.27198
593.5	-4.23003	-3.72883	-4.49169
594	-3.99809	-3.58186	-3.82029
594.5	-3.82719	-3.44539	-4.76021
595	-3.70512	-3.25642	-3.8935
595.5	-3.75394	-2.86799	-4.23528
596	-3.79056	-2.43758	-4.62588
596.5	-3.76614	-2.28011	-4.55262
597	-3.61965	-2.49007	-4.21081
597.5	-3.57082	-2.89949	-4.44273
598	-3.55861	-3.30892	-4.12533
598.5	-3.60743	-3.50838	-4.12531
599	-3.57081	-3.49788	-4.4915
599.5	-3.26563	-3.29842	-4.29617
600	-3.00928	-3.10946	-4.29616
600.5	-2.92382	-3.07796	-4.2351
601	-2.94823	-3.22493	-4.00315
601.5	-2.98485	-3.4139	-4.10079
602	-3.0703	-3.51888	-4.43037
602.5	-3.11912	-3.51888	-4.72332
603	-3.19236	-3.48739	-4.24723
603.5	-3.18015	-3.56088	-3.56361
604	-2.99704	-3.63436	-4.18616
604.5	-2.5942	-3.60287	-4.8209
605	-2.14254	-3.50839	-3.86874
605.5	-1.97163	-3.4139	-4.3448
606	-2.16694	-3.29843	-4.57671
606.5	-2.66743	-2.8995	-4.55228
607	-3.16791	-2.19613	-4.62551
607.5	-3.52191	-1.51376	-4.27149
608	-3.69281	-1.04135	-4.22264
608.5	-3.72942	-0.71591	-4.11276
609	-3.79045	-0.45346	-4.11274
609.5	-3.75383	-0.29599	-4.19817
610	-3.74162	-0.2435	-4.38126
610.5	-3.80265	-0.233	-4.19814
611	-3.9003	-0.2435	-4.90613
611.5	-3.88809	-0.2435	-4.29576
612	-3.83926	-0.22251	-4.35678
612.5	-3.81484	-0.18051	-4.33235
613	-3.80263	-0.20151	-0.82891
613.5	-3.766	-0.15952	-0.29179
614	-3.75379	-0.02305	-0.30398
614.5	-3.79041	0.12393	-0.16968
615	-3.7904	0.20791	-0.13304
615.5	-3.82702	0.12392	-0.15744
616	-3.81481	-0.10703	-0.20625
616.5	-3.76598	-0.296	-0.16961
617	-3.8148	-0.22251	-0.19401
617.5	-3.9979	-0.05454	-0.15737
618	-4.15659	0.07143	-0.25501
618.5	-4.13217	0.16591	-0.24279
619	-4.04672	0.17641	-0.26718
619.5	-3.91244	-0.06504	0.0258
620	-3.61947	-0.73692	-0.23053
620.5	-3.22884	-1.60826	-1.57329
621	-2.83821	-2.36412	-4.28323
621.5	-2.78938	-2.95201	-4.19776
622	-3.0091	-3.36143	-4.03906
622.5	-3.31427	-3.5504	-4.52732
623	-3.57061	-3.64488	-4.1733
623.5	-3.7293	-3.70787	-4.08783
624	-3.77812	-3.76036	-4.22209
624.5	-3.65605	-3.86534	-4.33194
625	-3.38749	-3.95983	-4.18544
625.5	-2.98465	-4.04381	-3.94128
626	-2.39871	-3.94933	-3.92905
626.5	-1.73953	-3.74987	-4.05111
627	-1.20242	-3.5609	-4.33185
627.5	-0.87282	-3.41393	-2.57402
628	-0.64088	-3.50841	-3.15994
628.5	-0.5066	-3.76037	-3.90456
629	-0.40894	-4.01232	-4.20971
629.5	-0.31128	-4.06481	-4.58811
630	-0.14038	-3.93884	-4.33175
630.5	-0.03051	-3.63439	-4.0998
631	0.01832	-3.09899	-3.73357
631.5	0.01832	-2.49011	-4.45377
632	-0.00609	-1.92321	-4.20961
632.5	-0.20139	-1.72375	-3.42834
633	-0.64084	-1.96521	-4.03868
633.5	-1.12912	-2.51111	-4.31942
634	-1.34884	-3.0885	-4.27058
634.5	-1.26339	-3.52942	-4.45367
635	-1.04366	-3.80237	-4.46586
635.5	-0.93379	-3.91785	-3.92873
636	-1.20234	-3.78137	-3.87988
636.5	-1.80048	-3.58191	-4.58787
637	-2.39862	-3.49793	-3.07419
637.5	-2.8869	-3.55042	-3.67231
638	-3.20428	-3.68689	-4.27044
638.5	-3.424	-3.76038	-4.51456
639	-3.50945	-3.87586	-4.57558
639.5	-3.49724	-3.86536	-4.38025
640	-3.33854	-3.72889	-4.33141
640.5	-2.80143	-3.56092	-4.57553
641	-2.08121	-3.45594	-4.49006
641.5	-1.69058	-3.51893	-4.67315
642	-1.93472	-3.62391	-4.22148
642.5	-2.4352	-3.70789	-4.68533
643	-2.86244	-3.71839	-4.20923
643.5	-3.17982	-3.63441	-4.38012
644	-3.36292	-3.48744	-4.3801
644.5	-3.37513	-3.44545	-4.63643
645	-3.28967	-3.24598	-4.30682
645.5	-3.30188	-2.85756	-3.23259
646	-3.31408	-2.49013	-4.08706
646.5	-3.192	-2.05971	-3.94056
647	-2.70372	-1.74477	-4.25793
647.5	-2.06895	-1.66078	-4.11142
648	-1.48301	-1.92323	-3.64754
648.5	-1.32431	-2.33266	-3.70856
649	-1.39755	-2.70009	-3.83061
649.5	-1.38534	-2.91005	-0.91311
650	-1.16561	-3.09902	0.07567
650.5	-0.78719	-3.23549	-0.37597
651	-0.50642	-3.13051	-0.14402
651.5	-0.28669	-2.98354	-0.07076
652	-0.4942	-2.86806	-0.40033
652.5	-1.11676	-2.94155	-1.14494
653	-1.83697	-3.10952	-3.79385
653.5	-2.2398	-3.36147	-4.40419
654	-2.27642	-3.59243	-3.7572
654.5	-1.98344	-3.65542	-4.37974
655	-1.80033	-3.58193	-4.41634
655.5	-2.03226	-3.40347	-4.25763
656	-2.4595	-2.93106	-4.35527
656.5	-2.9844	-2.28018	-4.24539
657	-3.31399	-1.70279	-4.50172
657.5	-3.42385	-1.24087	-4.44067
658	-3.30177	-0.92593	-4.29417
658.5	-3.11866	-0.67398	-4.42843
659	-3.08204	-0.71597	-2.74384
659.5	-3.16748	-1.18838	-3.09783
660	-3.35059	-1.95474	-4.08658
660.5	-3.44824	-2.7001	-3.37856
661	-3.59472	-3.2355	-0.92493
661.5	-3.68016	-3.60294	-0.31456
662	-3.79002	-3.92838	-0.33895
662.5	-3.7656	-4.22232	-2.30427
663	-3.68015	-4.3588	-4.14751
663.5	-3.52146	-4.32731	-4.55033
664	-3.41159	-4.21183	-4.31838
664.5	-3.37496	-4.10685	-4.46485
665	-3.43599	-3.93888	-3.48827
665.5	-3.55806	-3.74991	-4.02536
666	-3.65571	-3.48746	-4.22065
666.5	-3.72895	-3.288	-3.9887
667	-3.66791	-3.21452	-4.34269
667.5	-3.70453	-3.2985	-4.40371
668	-3.85101	-3.43498	-4.11072
668.5	-3.76556	-3.43498	-4.83092
669	-3.26506	-3.44548	-4.29379
669.5	-2.52043	-3.52946	-3.70784
670	-1.80021	-3.60295	-3.89093
670.5	-1.20206	-3.38249	-4.19609
671	-0.86026	-3.09904	-4.08621
671.5	-0.5795	-3.03605	-4.4524
672	-0.4208	-3.23552	-4.08617
672.5	-0.46962	-3.59245	-4.36692
673	-0.57948	-3.98088	-4.50118
673.5	-0.62831	-4.02287	-4.18378
674	-0.49403	-3.73943	-4.56218
674.5	-0.29871	-3.49797	-4.02505
675	-0.16443	-3.45598	-4.47669
675.5	-0.1278	-3.56096	-4.29357
676	-0.06676	-3.60295	-4.25693
676.5	-0.09117	-3.60296	-4.53768
677	-0.07896	-3.46648	-4.6109
677.5	-0.07896	-3.3615	-4.30571
678	-0.1522	-3.372	-4.41556
678.5	-0.27426	-3.351	-4.54982
679	-0.35971	-3.19353	-4.08593
679.5	-0.38412	-2.8681	-3.92722
680	-0.42073	-2.62664	-4.42769
680.5	-0.49397	-2.60565	-4.50092
681	-0.53059	-2.8576	-4.69621
681.5	-0.46955	-3.18304	-4.39102
682	-0.3841	-3.48748	-4.68397
682.5	-0.35968	-3.67645	-4.19567
683	-0.33526	-3.79193	-4.31773
683.5	-0.32305	-3.89691	-4.42757
684	-0.31084	-3.9704	-4.3299
684.5	-0.28642	-3.9494	-2.76738
685	-0.29862	-3.84442	-0.15506
685.5	-0.32303	-3.52948	-0.85084
686	-0.40848	-2.94159	-4.50073
686.5	-0.39627	-2.3327	-4.07347
687	-0.48171	-1.94428	-4.23214
687.5	-0.90895	-1.98627	-4.39082
688	-1.53151	-2.3537	-4.29314
688.5	-2.11744	-2.82611	-4.48844
689	-2.5691	-3.12006	-3.74379
689.5	-2.94751	-3.15155	-4.10999
690	-3.14282	-3.06757	-4.26866
690.5	-3.2771	-2.84711	-4.58603
691	-3.37475	-2.3852	-4.75691
691.5	-3.46019	-1.79731	-4.31744
692	-3.53343	-1.24091	-4.23197
692.5	-3.6555	-0.82099	-4.07326
693	-3.75315	-0.53755	-1.36328
693.5	-3.80197	-0.31709	-0.21581
694	-3.8508	-0.2226	-0.26462
694.5	-3.863	-0.64253	0.00396
695	-3.93624	-1.49287	-1.18011
695.5	-4.03389	-2.33271	-4.13419
696	-4.14375	-2.91011	-4.25625
696.5	-4.16816	-3.23555	-4.13416
697	-3.97284	-3.37202	-3.67028
697.5	-3.78973	-3.498	-4.2562
698	-3.77752	-3.59248	-3.96321
698.5	-3.86297	-3.60298	-3.95099
699	-3.924	-3.5295	-4.19511
699.5	-4.03386	-3.43501	-4.13406
700	-4.04606	-3.45601	-4.57349
700.5	-4.00944	-3.58199	-4.14623
701	-4.00943	-3.72896	-4.19504
701.5	-4.10708	-3.74996	-4.24385
702	-4.07046	-3.70797	-3.8288
702.5	-3.89956	-3.56099	-4.35368
703	-3.74086	-3.05709	-4.40249
703.5	-3.61879	-2.28023	-3.76771
704	-3.54554	-1.42989	-4.29259
704.5	-3.60657	-0.81051	-4.39023
705	-3.75305	-0.42208	-4.23153
705.5	-3.80188	-0.28561	-4.43903
706	-3.76525	-0.28561	-4.15825
706.5	-3.70421	-0.3486	-4.37796
707	-3.63096	-0.3486	-2.99855
707.5	-3.47227	-0.24362	-4.07275
708	-3.24033	-0.07565	-4.1948
708.5	-3.13046	0.03983	-4.31685
709	-3.27694	0.03983	-4.03608
709.5	-3.65536	-0.03366	-4.51213
710	-4.04598	-0.04416	-4.17032
710.5	-4.21687	-0.01266	-4.10927
711	-4.15583	0.01883	-4.20691
711.5	-4.13142	0.00833	-3.92613
712	-4.24128	-0.14914	-2.90072
712.5	-4.39996	-0.29611	-3.16926
713	-4.52203	-0.31711	-4.37774
713.5	-4.53423	-0.20163	-4.09696
714	-4.49761	-0.03366	-4.30446
714.5	-4.43657	-0.07566	-4.29224
715	-4.48539	-0.21213	-4.2678
715.5	-4.43656	-0.27512	-3.03488
716	-4.41214	-0.20163	-3.53535
716.5	-4.48538	-0.09665	-3.66961
717	-4.55862	-0.02317	-4.35318
717.5	-4.54641	0.01882	-4.68276
718	-4.3755	-0.01267	-4.27991
718.5	-4.26564	-0.07566	-4.30431
719	-4.25343	-0.12815	-4.38974
719.5	-4.37549	-0.08616	-4.15779
720	-4.42432	-0.06517	-4.53619
720.5	-4.42431	-0.02317	-4.09672
721	-4.42431	-0.04417	-3.36428
721.5	-4.4243	-0.08616	-4.24317
722	-4.35106	-0.07567	-4.20653
722.5	-4.22898	-0.02318	-4.38962
723	-4.2656	-0.02318	-4.30415
723.5	-4.24118	-0.07567	-4.21868
724	-4.26559	-0.11766	-4.48722
724.5	-4.25338	-0.13866	-4.63369
725	-4.16793	-0.14916	-4.1576
725.5	-4.04585	-0.17015	-4.05993
726	-4.04585	-0.15965	-3.81577
726.5	-4.18012	-0.14916	-4.05989
727	-4.37543	-0.07567	-4.16974
727.5	-4.54633	-0.06517	-3.07109
728	-4.5097	-0.10717	-3.82791
728.5	-4.38763	-0.15966	-4.56031
729	-4.21672	-0.13866	-4.08422
729.5	-4.15568	-0.09667	-4.426
730	-4.0092	-0.10717	-3.87667
730.5	-3.91154	-0.08617	-4.51141
731	-3.87491	-0.02319	-4.3405
731.5	-3.75284	0.0608	-4.48697
732	-3.39883	-0.02319	-4.42591
732.5	-2.82509	-0.13867	-4.20617
733	-2.20253	-0.22265	-3.90098
733.5	-1.57997	-0.22265	-4.27938
734	-1.1283	-0.15966	-4.20612
734.5	-0.84754	-0.11767	-4.18169
735	-0.64001	-0.05468	-3.82767
735.5	-0.43249	0.0083	-4.438
736	-0.23717	0.0398	-3.99853
736.5	-0.15172	0.0083	-3.88865
737	-0.09068	0.0188	-4.07174
737.5	-0.13951	-0.03369	-3.42475
738	-0.17612	-0.07568	-4.12053
738.5	-0.3226	-0.14917	-4.31583
739	-0.46908	-0.14917	-4.40126
739.5	-0.61556	-0.09668	-3.87634
740	-0.61556	0.02929	-4.31578
740.5	-0.50569	0.12378	-4.2059
741	-0.5301	0.07128	-4.2425
741.5	-0.85969	-0.0022	-4.21807
742	-1.50666	-0.11768	-4.27909
742.5	-2.26349	-0.15967	-4.14479
743	-2.94708	-0.12818	-4.07153
743.5	-3.3377	-0.0442	-4.30345
744	-3.53301	-0.0232	-4.2546
744.5	-3.66728	-0.0232	-4.4499
745	-3.86259	-0.10719	-4.08367
745.5	-4.00907	-0.24366	-4.10807
746	-4.0701	-0.38014	-4.27895
746.5	-4.0701	-0.42213	-4.25452
747	-4.03347	-0.33815	-4.20567
747.5	-4.02126	-0.25416	-4.35214
748	-4.02126	-0.12819	-4.12019
748.5	-4.03346	0.02928	-4.35211
749	-4.04566	0.13426	-4.63285
749.5	-4.20435	0.11327	-4.31545
750	-4.32642	0.08177	-1.87403
750.5	-4.302	0.06077	-3.64403
751	-4.25317	0.00828	-4.76706
751.5	-4.3142	0.07127	-4.01021
752	-4.30199	0.14476	-4.38861
752.5	-4.21653	0.16575	-4.26652
753	-4.09446	0.12376	-2.6918
753.5	-4.009	0.07127	-4.05897
754	-3.98459	-0.01272	-2.82604
754.5	-3.93575	-0.12819	-0.23813
755	-3.83809	-0.20168	-0.11604
755.5	-3.6794	-0.18069	0.00604
756	-3.60615	-0.02322	-0.6287
756.5	-3.55732	0.06077	-0.25027
757	-3.61835	0.06077	-0.1526
757.5	-3.77704	-0.03372	-0.11596
758	-3.93573	-0.1387	-0.40891
758.5	-3.98455	-0.21218	-0.10372
759	-3.9113	-0.18069	-0.2868
759.5	-3.77702	-0.20169	-0.26237
760	-3.53288	-0.45364	0.10385
760.5	-3.3986	-0.89456	-0.2013
761	-3.39859	-1.42996	-0.32336
761.5	-3.61831	-1.94437	-0.10361
762	-3.82583	-2.40628	-0.01815
762.5	-3.93569	-2.74222	0.01849
763	-3.9601	-2.97318	-0.35991
763.5	-3.96009	-3.20413	-0.18899
764	-3.99671	-3.3616	0.04296
764.5	-3.96009	-3.4036	-0.10351
765	-3.86243	-3.3826	-0.26219
765.5	-3.72815	-3.36161	-0.79928
766	-3.81359	-3.3826	-0.18891
766.5	-3.98448	-3.44559	-0.11565
767	-4.16759	-3.43509	-0.09122
767.5	-4.24082	-3.18314	-0.14003
768	-4.2042	-2.63724	-0.00573
768.5	-3.92343	-1.84989	-0.21324
769	-3.61825	-1.12553	-0.16439
769.5	-3.56942	-0.60062	-0.22541
770	-3.61825	-0.25419	0.00654
770.5	-3.53279	-0.05473	-0.18875
771	-3.32527	0.07125	-0.00563
771.5	-3.14216	0.05025	-0.21313
772	-2.98346	-0.02324	0.18971
772.5	-2.94684	-0.14921	-0.31076
773	-3.00787	-0.2332	0.17754
773.5	-3.09331	-0.2122	-0.26189
774	-3.00786	-0.17021	-0.24967
774.5	-2.53178	-0.15971	0.05552
775	-1.86039	-0.13872	-0.12757
775.5	-1.31107	-0.08623	-0.29845
776	-0.99368	0.03975	-0.13974
776.5	-0.88382	0.15523	-0.26179
777	-0.88381	0.17622	-0.50591
777.5	-0.89602	0.17622	-0.35941
778	-1.10353	0.13423	-0.22512
778.5	-1.55519	0.14473	-0.46924
779	-2.11671	0.13423	-0.31053
779.5	-2.51954	0.03974	-0.2739
780	-2.40967	-0.04424	-0.56685
780.5	-2.01904	-0.07574	-3.69183
781	-1.49413	-0.21221	-4.44865
781.5	-0.9204	-0.69512	-3.91152
782	-0.52977	-1.23052	-4.37537
782.5	-0.44431	-1.50347	-4.14342
783	-0.4321	-1.40899	-4.08237
783.5	-0.31003	-1.13604	-4.52181
784	-0.23678	-0.91558	-4.75372
784.5	-0.22457	-0.75811	-3.60624
785	-0.39547	-0.94708	-5.07107
785.5	-0.93257	-1.46148	-4.43629
786	-1.65278	-2.09137	-4.30199
786.5	-2.39741	-2.64776	-3.88694
787	-3.00776	-3.03619	-4.63155
787.5	-3.34955	-3.22516	-3.38642
788	-3.54486	-3.12018	-4.06999
788.5	-3.74016	-2.75275	-3.9479
789	-3.8134	-2.21735	-4.3263
789.5	-3.83781	-1.69245	-4.0089
790	-3.8134	-1.13605	-4.11875
790.5	-3.75236	-0.61115	-3.43514
791	-3.6669	-0.20172	-4.36286
791.5	-3.76455	0.03973	-2.93462
792	-4.05752	0.09222	-4.09427
792.5	-4.31386	0.03973	-4.15529
793	-4.33827	0.01873	-3.65478
793.5	-4.2162	0.1657	-4.83885
794	-4.0575	0.32317	-4.68014
794.5	-3.80115	0.36517	-3.27631
795	-3.60583	0.20769	-1.70159
795.5	-3.53259	0.01873	-2.73917
796	-3.61803	-0.04426	-3.67909
796.5	-3.75231	0.08172	-4.36267
797	-3.80113	0.1867	-4.28941
797.5	-3.72788	0.1657	-4.10629
798	-3.67905	0.11321	-4.02082
798.5	-3.72788	0.03972	-3.92315
799	-3.86215	-0.01277	-3.94754
799.5	-4.03304	-0.05476	-3.61794
800	-3.98421	-0.01277	-4.13062
800.5	-3.88655	0.02922	-4.25267
801	-3.75227	0.02922	-4.04513
801.5	-3.58137	-0.10725	-3.82539
802	-3.4715	-0.30672	-2.77557
802.5	-3.53253	-0.4012	-3.84977
803	-3.67901	-0.32772	-4.22817
803.5	-3.78887	-0.19124	-4.42346
804	-3.78887	-0.08626	-4.11827
804.5	-3.74003	0.05021	-4.46005
805	-3.75224	0.1132	-4.53328
805.5	-3.77665	0.06071	-4.19146
806	-3.81326	-0.04427	-4.25248
806.5	-3.76443	-0.17025	-4.11819
807	-3.7156	-0.25423	-4.3501
807.5	-3.7278	-0.27523	-4.48436
808	-3.78883	-0.14925	-4.08151
808.5	-3.81324	-0.09677	-4.35005
809	-3.75221	-0.08627	-2.78753
809.5	-3.69117	-0.19125	-0.1508
810	-3.63013	-0.33822	-0.02871
810.5	-3.61792	-0.38021	-0.3827
811	-3.69115	-0.29623	-0.45592
811.5	-3.91088	-0.15976	-0.30942
812	-4.05736	0.02921	0.0446
812.5	-4.02073	0.14469	-0.02863
813	-3.88645	0.12369	-0.56572
813.5	-3.78879	0.0712	-4.41092
814	-3.8132	-0.05478	-3.99586
814.5	-3.83761	-0.09677	-4.15453
815	-3.89864	-0.11777	-4.33762
815.5	-3.91084	-0.15976	-4.30098
816	-3.8498	-0.18076	-3.45868
816.5	-3.82539	-0.13877	-3.32439
817	-3.92304	-0.04429	-4.36197
817.5	-4.08173	0.0397	-3.71498
818	-4.17938	0.15518	-4.09338
818.5	-4.03289	0.28115	-4.31309
819	-3.78875	0.39663	-4.30086
819.5	-3.60564	0.33364	-4.06891
820	-3.52018	0.18667	-4.22759
820.5	-3.58121	-0.03379	-4.15433
821	-3.71549	-0.15977	-2.9214
821.5	-3.91079	-0.14927	-2.17675
822	-4.03286	-0.05479	-2.90916
822.5	-4.09389	0.05019	-4.64254
823	-4.1061	0.08168	-4.63032
823.5	-4.08168	0.0187	-4.53264
824	-4.00843	-0.06529	-4.52042
824.5	-3.92298	-0.11778	-4.20302
825	-3.92297	-0.12828	-4.14197
825.5	-3.89856	-0.07579	-3.89781
826	-3.93517	-0.07579	-4.45932
826.5	-3.95958	-0.12828	-3.97102
827	-3.97179	-0.21227	-4.06866
827.5	-3.97178	-0.30675	-4.31278
828	-3.95957	-0.35924	-3.28737
828.5	-3.86191	-0.30675	-4.08081
829	-3.76425	-0.17028	-4.48363
829.5	-3.70321	-0.11779	-4.04416
830	-3.70321	-0.10729	-4.30049
830.5	-3.77644	-0.18078	-4.25164
831	-3.84968	-0.22277	-3.81217
831.5	-3.83747	-0.32775	-4.32485
832	-3.41022	-0.43273	-4.28821
832.5	-2.75104	-0.42223	-4.37364
833	-2.37262	-0.33825	-3.99521
833.5	-2.50689	-0.21227	-4.3492
834	-2.90972	-0.13879	-4.43463
834.5	-3.27592	-0.18078	-3.09184
835	-3.56889	-0.28576	-2.51809
835.5	-3.72758	-0.24377	-4.32471
836	-3.76419	-0.15979	-4.39794
836.5	-3.6055	-0.0758	-4.32468
837	-3.53225	-0.0968	-4.12935
837.5	-3.52004	-0.04431	-4.45892
838	-3.53224	-0.03381	-4.65422
838.5	-3.55665	-0.03381	-4.1293
839	-3.54444	-0.06531	-3.83631
839.5	-3.45899	-0.1073	-4.73961
840	-3.36133	-0.00232	-5.06919
840.5	-3.43457	0.10266	-4.45882
841	-3.62987	0.10266	-3.97052
841.5	-3.87401	-0.01282	-3.72636
842	-3.92284	-0.06531	-4.20242
842.5	-3.93504	-0.08631	-3.79957
843	-3.94724	-0.03382	-4.19018
843.5	-3.94724	0.00817	-4.06809
844	-3.93503	0.00817	-3.73848
844.5	-3.94723	-0.03382	-4.27558
845	-3.94723	-0.09681	-4.33659
845.5	-3.99605	-0.11781	-3.49429
846	-3.99605	-0.09681	-4.14125
846.5	-3.83735	0.07116	-4.21447
847	-3.80072	0.18664	-4.1168
847.5	-3.7641	0.13415	-4.12899
848	-3.78851	0.06066	-4.28766
848.5	-3.87395	-0.00233	-4.11675
849	-4.00823	-0.08632	-4.09232
849.5	-3.99602	-0.10731	-4.45851
850	-3.92277	-0.06532	-4.1289
850.5	-3.83732	-0.03383	-4.14109
851	-3.60538	-0.01283	-4.3486
851.5	-3.37344	0.00816	-4.37299
852	-3.16592	0.03966	-4.34856
852.5	-3.20254	0.03966	-4.14103
853	-3.36122	0.03966	-3.59169
853.5	-3.56874	0.09215	-4.07996
854	-3.6908	0.11314	-4.06773
854.5	-3.6908	0.20762	-4.26303
855	-3.66638	0.3126	-4.0677
855.5	-3.76403	0.3441	-4.39727
856	-3.81286	0.3126	-4.45829
856.5	-3.7152	0.22862	-3.90895
857	-3.64195	0.10264	-4.34839
857.5	-3.64195	-0.02334	-4.01878
858	-3.72739	-0.01284	-4.01877
858.5	-3.78842	-0.00234	-4.04316
859	-3.80063	0.00815	-3.98211
859.5	-3.83724	0.05015	-4.18961
860	-3.87386	0.03965	-3.99428
860.5	-3.89827	0.00815	-3.81116
861	-3.91047	0.00815	-3.88439
861.5	-3.93488	-0.04434	-3.90878
862	-3.95929	-0.08633	-4.32381
862.5	-4.00812	-0.09683	-3.60357
863	-4.04473	-0.06534	-3.83549
863.5	-4.04473	-0.02334	-4.38479
864	-4.00811	0.06064	-4.28712
864.5	-4.02031	0.12363	-4.65331
865	-4.0203	0.10263	-4.56784
865.5	-3.98368	0.10263	-4.38472
866	-3.97147	0.12362	-3.98187
866.5	-4.02029	0.08163	-4.10392
867	-4.06912	-0.03385	-4.2626
867.5	-4.03249	-0.12833	-3.74989
868	-3.99587	-0.13883	-4.10387
868.5	-3.94703	-0.12833	-4.38462
869	-3.83717	-0.15983	-3.77425
869.5	-3.73951	-0.2858	-4.21369
870	-3.75171	-0.47477	-4.54326
870.5	-3.9104	-0.62174	-3.90847
871	-4.06908	-0.62174	-0.40504
871.5	-4.03246	-0.48527	-2.52905
872	-3.95921	-0.3278	-4.48215
872.5	-3.83714	-0.20182	-4.0671
873	-3.7761	-0.05485	-4.49433
873.5	-3.83713	0.01864	-4.61638
874	-3.86154	-0.00236	-4.1525
874.5	-3.88595	-0.06535	-4.1891
875	-3.95919	-0.11784	-4.29895
875.5	-3.99581	-0.05485	-4.28672
876	-4.05684	0.03963	-4.07919
876.5	-4.06904	0.10262	-4.05475
877	-3.97138	0.06062	-1.01519
877.5	-3.78827	0.03963	-0.29495
878	-3.65399	-0.07585	-0.19728
878.5	-3.60516	-0.22283	-0.07519
879	-3.64177	-0.31731	-0.61229
879.5	-3.75163	-0.32781	-0.30709
880	-3.83708	-0.23333	-0.185
880.5	-3.80045	-0.13884	-0.40471
881	-3.80045	-0.11785	-0.19718
881.5	-3.86148	-0.21233	-0.46571
882	-3.84927	-0.22283	-0.18494
882.5	-3.94692	-0.11785	-0.03843
883	-4.03237	0.01862	-0.08725
883.5	-3.98353	0.09211	-0.40461
884	-3.55628	0.09211	-3.05352
884.5	-2.71399	0.10261	-4.01786
885	-1.78626	0.10261	-3.93239
885.5	-1.26135	0.09211	-3.57837
886	-1.32238	0.00812	-3.00462
886.5	-1.78624	-0.11785	-4.28635
887	-2.44542	-0.23333	-4.12764
887.5	-3.10459	-0.18084	-3.79803
888	-3.55625	-0.05487	-3.90788
888.5	-3.66611	0.02912	-4.12759
889	-3.69052	0.1131	-4.28626
889.5	-3.77596	0.16559	-3.93224
890	-3.87362	0.23907	-4.15195
890.5	-3.94685	0.26007	-3.95662
891	-4.0323	0.20758	-4.51812
891.5	-4.00788	0.02911	-2.99223
892	-3.50739	-0.14936	-3.37063
892.5	-2.68951	-0.29633	-3.93214
893	-2.03033	-0.27533	-4.28612
893.5	-1.74956	-0.24384	-4.17624
894	-1.56646	-0.17035	-4.24947
894.5	-1.37114	-0.06537	-1.63715
895	-1.09037	-0.01288	-4.13957
895.5	-0.77299	0.01861	-4.02969
896	-0.49222	-0.01289	-4.20057
896.5	-0.27249	-0.07587	-4.22497
897	-0.19924	-0.14936	-4.27378
897.5	-0.19924	-0.11787	-4.29818
898	-0.26027	-0.06538	-3.70001
898.5	-0.33351	0.0606	-2.65019
899	-0.69972	0.14458	-2.77224
899.5	-1.26123	0.15508	-4.07838
900	-1.79834	0.09209	-3.67553
900.5	-2.34765	-0.04439	-3.90745
901	-2.84814	-0.14937	-3.98067
901.5	-3.34862	-0.28584	-4.32245
902	-3.64159	-0.33833	-4.65203
902.5	-3.76365	-0.38033	-4.65201
903	-3.72703	-0.32784	-3.9684
903.5	-3.78806	-0.23335	-4.42004
904	-3.83688	-0.12837	-4.5543
904.5	-3.86129	-0.10738	-4.21249
905	-3.87349	-0.12837	-4.59089
905.5	-3.87349	-0.13887	-4.45659
906	-3.91011	-0.08638	-4.1514
906.5	-3.88569	-0.0024	-4.32228
907	-3.81244	-0.0024	-4.29785
907.5	-3.60492	-0.0024	-4.39549
908	-3.43402	0.02909	-4.04147
908.5	-3.4096	0.14457	-4.2978
909	-3.51946	0.13407	-4.34661
909.5	-3.6049	-0.0234	-4.38321
910	-3.67814	-0.11788	-4.2123
910.5	-3.80021	-0.08639	-4.17566
911	-3.84903	-0.0549	-3.94371
911.5	-3.88565	0.03959	-4.39535
912	-3.82461	0.18656	-4.41975
912.5	-3.54384	0.23905	-4.13897
913	-2.92128	0.23905	-4.34647
913.5	-2.22548	0.20755	-3.93142
914	-1.55409	0.27054	-4.01685
914.5	-1.10242	0.23905	-4.27318
915	-0.83386	0.10257	-4.26095
915.5	-0.67517	0.02908	-3.78486
916	-0.5653	0.09207	-4.10223
916.5	-0.4066	0.17605	-3.23551
917	-0.30894	0.24954	-4.00454
917.5	-0.19908	0.36502	-4.3097
918	-0.12583	0.35452	-4.43175
918.5	-0.04038	0.19705	-3.91904
919	0.04508	-0.04441	-4.3951
919.5	0.14274	-0.21238	-3.94342
920	0.14274	-0.25437	-4.17533
920.5	0.0573	-0.21238	-4.04104
921	-0.13801	-0.0864	-3.94337
921.5	-0.33332	0.02908	-4.22411
922	-0.43097	0.03957	-4.32175
922.5	-0.39435	0.00808	-4.37056
923	-0.22345	0.05007	-4.50482
923.5	-0.11358	0.08156	-4.40715
924	-0.10137	0.01857	-3.89444
924.5	-0.21123	-0.1389	-3.95545
925	-0.26005	-0.29637	-4.2362
925.5	-0.29667	-0.34886	-3.16196
926	-0.38211	-0.19139	-4.2972
926.5	-0.49197	-0.00242	-4.40705
927	-0.49197	0.07106	-4.1873
927.5	-0.41872	0.02907	-3.8699
928	-0.3821	-0.09691	-3.60133
928.5	-0.33326	-0.1284	-4.2727
929	-0.35767	-0.24388	-2.85667
929.5	-0.27222	-0.6953	-3.14962
930	-0.21118	-1.44066	-4.24823
930.5	-0.17456	-2.23851	-4.07732
931	-0.15014	-2.88939	-4.57779
931.5	-0.07689	-3.28832	-4.11391
932	-0.06468	-3.51928	-4.11389
932.5	-0.12571	-3.58227	-4.5045
933	-0.12571	-3.65575	-4.3702
933.5	-0.1135	-3.72924	-4.21149
934	-0.17453	-3.67675	-4.32134
934.5	-0.28439	-3.49828	-4.19925
935	-0.24776	-3.21484	-4.12599
935.5	-0.17452	-3.06786	-4.04053
936	-0.13789	-3.13085	-4.29686
936.5	-0.12568	-3.29882	-4.55319
937	-0.08905	-3.4353	-4.32124
937.5	-0.02802	-3.49829	-3.89397
938	0.03302	-3.57177	-3.82071
938.5	-0.05242	-3.60327	-4.13808
939	-0.27214	-3.65576	-4.22351
939.5	-0.47966	-3.63476	-3.46666
940	-0.61393	-3.57178	-4.28451
940.5	-0.63834	-3.55078	-4.06477
941	-0.60172	-3.57178	-3.91827
941.5	-0.46744	-3.54028	-4.32108
942	-0.34536	-3.52979	-4.05251
942.5	-0.18667	-3.55078	-3.99146
943	-0.06459	-3.4458	-4.04027
943.5	-0.05238	-3.01538	-4.21115
944	-0.1012	-2.27002	-4.47969
944.5	-0.15003	-1.47217	-4.44305
945	-0.16223	-0.82129	-4.35758
945.5	-0.18664	-0.43287	-4.29653
946	-0.17443	-0.2334	-4.25989
946.5	-0.21105	-0.10743	-3.82042
947	-0.36973	0.02905	-2.01376
947.5	-0.52842	0.17602	-3.97908
948	-0.61387	0.17602	-4.46734
948.5	-0.63828	0.02904	-4.40629
949	-0.63827	-0.15992	-3.82034
949.5	-0.56503	-0.20191	-3.7837
950	-0.44295	-0.11793	-4.06444
950.5	-0.30867	0.01854	-4.02781
951	-0.1866	0.10253	-4.21089
951.5	-0.05232	0.10253	-4.22308
952	-0.0401	0.10253	-3.83244
952.5	-0.12555	0.12352	-4.27188
953	-0.29644	0.00804	-4.02772
953.5	-0.3941	-0.12843	-4.16198
954	-0.45513	-0.11794	-4.24741
954.5	-0.54057	-0.02345	-4.12533
955	-0.6016	0.11302	-4.14972
955.5	-0.6016	0.25999	-4.88213
956	-0.4429	0.28099	-4.345
956.5	-0.24759	0.17601	-3.82008
957	-0.07668	0.03953	-1.14672
957.5	-0.00344	-0.03396	-0.20676
958	-0.04006	-0.01296	-0.19454
958.5	-0.11329	-0.03396	-0.58515
959	-0.18653	-0.15993	-0.02361
959.5	-0.24756	-0.24392	-0.30435
960	-0.27197	-0.17043	-0.09682
960.5	-0.21093	-0.00246	-0.32873
961	-0.07665	0.08152	-0.26768
961.5	0.04542	0.03953	0.000891685
962	0.03322	-0.01296	-0.20661
962.5	-0.08885	-0.06546	-0.23101
963	-0.27195	-0.05496	-0.54837
963.5	-0.44284	-0.05496	-0.30422
964	-0.41842	-0.08645	0.04981
964.5	-0.3818	-0.12845	0.08644
965	-0.45504	-0.06546	-0.0234
965.5	-0.94331	0.00803	-0.32856
966	-1.66353	0.155	-0.2553
966.5	-2.48139	0.19699	-0.19425
967	-3.16498	0.1445	-0.05996
967.5	-3.48236	0.05002	-0.3407
968	-3.58001	-0.11795	-0.23082
968.5	-3.62884	-0.23343	-0.19418
969	-3.72649	-0.24393	-0.96321
969.5	-3.86076	-0.26493	-3.72198
970	-4.08049	-0.30692	-4.3079
970.5	-4.27579	-0.35941	-4.32009
971	-4.31241	-0.35941	-4.10035
971.5	-4.16592	-0.21244	-4.19799
972	-3.98281	-0.01298	-4.53976
972.5	-3.67763	0.092	-4.07588
973	-3.25038	0.01852	-4.29559
973.5	-3.01845	-0.07597	-4.36881
974	-3.03065	-0.10746	-4.44204
974.5	-3.21375	-0.09696	-4.31995
975	-3.33582	0.06051	-2.87951
975.5	-3.4945	0.17598	-1.6832
976	-3.70202	0.21798	-3.78279
976.5	-3.94616	0.14449	-4.28326
977	-4.06822	0.00801	-4.63725
977.5	-3.98277	-0.12846	-4.17337
978	-3.88511	-0.27544	-4.19776
978.5	-3.77524	-0.41191	-4.27099
979	-3.66537	-0.40141	-3.978
979.5	-3.53109	-0.26494	-4.40523
980	-3.43343	-0.15996	-4.24652
980.5	-3.37239	-0.18096	-4.36858
981	-3.45784	-0.57988	-4.35635
981.5	-3.55549	-1.26226	-4.23426
982	-3.70197	-1.99712	-4.30749
982.5	-3.86066	-2.55352	-4.09995
983	-3.9461	-2.96294	-4.16097
983.5	-3.98272	-3.24639	-4.60041
984	-3.94609	-3.39336	-4.07549
984.5	-3.87285	-3.39336	-3.83133
985	-3.77519	-3.39336	-4.28297
985.5	-3.84843	-3.55083	-4.25854
986	-4.05594	-3.64532	-2.91575
986.5	-4.25125	-3.70831	-4.00216
987	-4.31228	-3.66632	-3.56269
987.5	-4.12917	-3.58233	-3.7824
988	-3.97048	-3.50885	-4.19742
988.5	-3.86061	-3.38287	-4.33168
989	-3.81178	-3.14142	-4.27063
989.5	-3.79957	-2.93145	-3.69688
990	-3.77515	-2.91046	-3.9288
990.5	-3.68969	-2.93146	-3.97761
991	-3.60424	-3.03644	-4.31939
991.5	-3.55541	-3.2149	-3.8555
992	-3.60423	-3.45636	-4.19728
992.5	-3.81175	-3.49835	-4.63672
993	-3.98264	-3.41437	-4.31932
993.5	-4.03147	-3.2359	-3.97751
994	-4.05588	-3.12043	-3.91645
994.5	-4.04367	-3.08893	-4.06292
995	-3.95821	-3.04694	-4.36808
995.5	-3.87276	-3.09943	-4.05068
996	-3.75068	-3.17292	-4.36804
996.5	-3.6164	-3.40388	-4.42906
997	-3.51874	-3.67683	-3.73324
997.5	-3.54315	-3.88679	-3.97737
998	-3.68963	-3.96027	-4.49005
998.5	-3.88494	-3.88679	-4.4412
999	-4.08025	-3.75031	-4.11159
999.5	-4.12907	-3.75031	-4.06275
[truncated: 18,156 more rows]

## Sheet: Panel_B and C_trace
wild type (wt VA5 2019_05_17_0005)													scyl-1(zw99) VA5 p1887 2019_05_16_0032													scyl-1(zw99) rescue p1887 res VA5 2019_05_17_0011
open time	histgram	Total	tau1	tau2		closed time	histgram	tau1	tau2	tau3	total		open time	histgram	Total	tau1	tau2		closed time	histgram	tau1	tau2	tau3	total		open time	histgram	Total	tau1	tau2		closed time	histgram	tau1	tau2	tau3	total
log10 (Duration [ms])	Count / Total					log10 (Duration [ms])	Count / Total						log10 (Duration [ms])	Count / Total					log10 (Duration [ms])	Count / Total						log10 (Duration [ms])	Count / Total					log10 (Duration [ms])	Count / Total
-1.30103	2.89881e-09	0.00341	0.00681	0.01603		-0.69897	0.04909	0.03825	0.000236317	6.15146e-05	0.03855		-1.30103	0.00167	0.00942	0.00638	0.01866		-1.30103	0.01331	0.00209	3.15854e-05	7.53567e-07	0.00212		-1.30103	2.29627e-09	0.01535	0.000447896	0.0158		-1.30103	0.04043	0.01061	5.46278e-05	4.04751e-29	0.01067
-1.23138	0.00693	0.00476	0.00849	0.01905		-0.6416	0.10914	0.05689	0.000460096	8.16665e-05	0.05743		-1.2317	0.00439	0.01113	0.00813	0.02212		-1.2317	0.00282	0.00495	7.74192e-05	1.39892e-06	0.00502		-1.23847	0.00489	0.01703	0.000669397	0.0177		-1.23117	0.02115	0.01877	0.000111248	6.63409e-28	0.01888
-1.16174	0.01338	0.0063	0.01036	0.02246		-0.58423	0.14119	0.08026	0.000865692	0.000107761	0.08123		-1.16237	0.01642	0.01308	0.01018	0.02613		-1.16237	0.01094	0.01064	0.000180749	2.5553e-06	0.01082		-1.17592	0.00933	0.01888	0.000999444	0.01988		-1.16131	0.04678	0.03127	0.000219503	1.01966e-26	0.03149
-1.09209	0.01947	0.00806	0.01244	0.0263		-0.52685	0.15605	0.10739	0.00157	0.000141337	0.1091		-1.09304	0.01861	0.0153	0.0126	0.03076		-1.09304	0.01352	0.0208	0.000401946	4.5927e-06	0.02121		-1.11336	0.01342	0.02093	0.00149	0.02242		-1.09145	0.06455	0.04905	0.000419626	1.46963e-25	0.04947
-1.02245	0.02603	0.01007	0.01472	0.03059		-0.46948	0.16261	0.13627	0.00277	0.000184239	0.13922		-1.0237	0.02099	0.0178	0.01543	0.0361		-1.0237	0.02578	0.03698	0.000851383	8.12213e-06	0.03784		-1.05081	0.01771	0.0232	0.00222	0.02541		-1.02159	0.08505	0.07246	0.000777241	1.98627e-24	0.07323
-0.9528	0.03341	0.01236	0.01722	0.03539		-0.41211	0.19377	0.16401	0.0047	0.000238704	0.16895		-0.95437	0.02293	0.02064	0.01873	0.04223		-0.95437	0.06508	0.05976	0.00172	1.41335e-05	0.06149		-0.98825	0.02257	0.02569	0.00329	0.02898		-0.95174	0.1032	0.1008	0.00139	2.51737e-23	0.1022
-0.88316	0.04186	0.01497	0.01994	0.04072		-0.35474	0.20064	0.18722	0.00771	0.000307392	0.19524		-0.88504	0.03237	0.02384	0.02257	0.04927		-0.88504	0.09704	0.0878	0.0033	2.41994e-05	0.09113		-0.9257	0.03227	0.02845	0.00485	0.03329		-0.88188	0.12601	0.13207	0.00243	2.99181e-22	0.13449
-0.81351	0.05148	0.01794	0.02287	0.04662		-0.29736	0.20437	0.20269	0.01223	0.000393457	0.21532		-0.81571	0.05051	0.02745	0.02699	0.0573		-0.81571	0.13213	0.11729	0.00604	4.07696e-05	0.12337		-0.86314	0.04423	0.03148	0.0071	0.03857		-0.81202	0.16534	0.16294	0.00409	3.33426e-21	0.16703
-0.74387	0.05307	0.02133	0.02598	0.05311		-0.23999	0.22301	0.20813	0.01875	0.000500538	0.22738		-0.74638	0.05701	0.03152	0.03205	0.06643		-0.74638	0.15457	0.14243	0.01053	6.75842e-05	0.15303		-0.80059	0.05617	0.03481	0.01028	0.04509		-0.74216	0.20681	0.18933	0.00667	3.48451e-20	0.196
-0.67422	0.04866	0.02516	0.02925	0.06022		-0.18262	0.22444	0.20269	0.02777	0.000632892	0.23109		-0.67705	0.09117	0.03608	0.03779	0.07673		-0.67705	0.16836	0.15725	0.01749	0.000110238	0.17485		-0.73803	0.05922	0.03847	0.01463	0.0531		-0.6723	0.22311	0.20717	0.01055	3.41479e-19	0.21771
-0.60458	0.06673	0.02951	0.03263	0.06794		-0.12525	0.21548	0.18722	0.03975	0.000795382	0.22777		-0.60771	0.09548	0.04119	0.04422	0.08827		-0.60771	0.1755	0.15783	0.02767	0.000176926	0.18568		-0.67548	0.06001	0.04249	0.02031	0.0628		-0.60244	0.23055	0.21348	0.01616	3.13808e-18	0.22964
-0.53493	0.08927	0.03443	0.03604	0.07627		-0.06788	0.20287	0.16401	0.055	0.000993518	0.22		-0.53838	0.09671	0.04689	0.05132	0.10108		-0.53838	0.18622	0.14402	0.04169	0.000279403	0.18599		-0.61292	0.07308	0.04688	0.02717	0.07405		-0.53258	0.22612	0.20717	0.02399	2.70422e-17	0.23116
-0.46528	0.09753	0.03997	0.03939	0.08517		-0.0105	0.19668	0.13627	0.07353	0.00123	0.21104		-0.46905	0.12127	0.05323	0.05903	0.11512		-0.46905	0.18777	0.11948	0.05983	0.000434157	0.17974		-0.55037	0.08424	0.05169	0.03436	0.08605		-0.46272	0.21793	0.18933	0.03451	2.18524e-16	0.22383
-0.39564	0.10101	0.04621	0.04257	0.09458		0.04687	0.18572	0.10739	0.09501	0.00152	0.20392		-0.39972	0.15247	0.06024	0.0672	0.13031		-0.39972	0.17506	0.09011	0.08178	0.000663802	0.17256		-0.48781	0.09001	0.05693	0.03998	0.0969		-0.39287	0.20848	0.16294	0.04809	1.6559e-15	0.21103
-0.32599	0.12467	0.0532	0.04543	0.10444		0.10424	0.1779	0.08026	0.11864	0.00187	0.20077		-0.33039	0.14802	0.06797	0.07559	0.14643		-0.33039	0.17678	0.06178	0.10648	0.000998635	0.16927		-0.42526	0.11025	0.06262	0.04109	0.10372		-0.32301	0.20531	0.13207	0.06493	1.17665e-14	0.197
-0.25635	0.12444	0.06102	0.04782	0.11464		0.16161	0.15758	0.0569	0.14316	0.00228	0.20234		-0.26106	0.16206	0.07644	0.08385	0.16316		-0.26106	0.17005	0.03851	0.13205	0.00148	0.17205		-0.3627	0.1013	0.06881	0.03515	0.10396		-0.25315	0.17699	0.1008	0.08495	7.8404e-14	0.18575
-0.1867	0.13033	0.0697	0.04956	0.12507		0.21899	0.14397	0.03825	0.16696	0.00276	0.20797		-0.19173	0.19943	0.08565	0.09152	0.18003		-0.19173	0.16432	0.02183	0.15599	0.00215	0.17997		-0.30015	0.08956	0.0755	0.02294	0.09843		-0.18329	0.16542	0.07246	0.10767	4.899e-13	0.18013
-0.11706	0.13087	0.07931	0.05046	0.13558		0.27636	0.18179	0.02439	0.18817	0.00332	0.21588		-0.12239	0.18451	0.09558	0.09797	0.19642		-0.12239	0.18326	0.01125	0.17551	0.00309	0.18984		-0.23759	0.08582	0.08271	0.01007	0.09278		-0.11343	0.17039	0.04905	0.13223	2.87048e-12	0.18128
-0.04741	0.14449	0.08988	0.05034	0.14603		0.33373	0.2002	0.01475	0.20495	0.00397	0.22367		-0.05306	0.20191	0.10619	0.10251	0.21157		-0.05306	0.19983	0.00527	0.18809	0.00435	0.19771		-0.17504	0.09482	0.09045	0.00249	0.09294		-0.04357	0.18365	0.03127	0.15734	1.57718e-11	0.18861
0.02223	0.15458	0.10143	0.04908	0.15631		0.3911	0.2341	0.00846	0.21573	0.00473	0.22892		0.01627	0.22837	0.1174	0.10439	0.22465		0.01627	0.21632	0.00224	0.192	0.00604	0.20028		-0.11248	0.09963	0.09873	0.000268803	0.099		0.02629	0.19171	0.01877	0.18139	8.12617e-11	0.20016
0.09188	0.14792	0.11392	0.04657	0.1663		0.44847	0.22297	0.0046	0.21944	0.00559	0.22964		0.0856	0.22549	0.12907	0.10289	0.23483		0.0856	0.20321	0.000868287	0.18668	0.00824	0.19579		-0.04993	0.07694	0.10753	8.83331e-06	0.10754		0.09615	0.20085	0.01061	0.20261	3.92616e-10	0.21322
0.16153	0.15727	0.12732	0.04283	0.17595		0.50585	0.21842	0.00237	0.21572	0.00657	0.22467		0.15493	0.25826	0.14101	0.09756	0.24143		0.15493	0.18606	0.000305596	0.17289	0.01107	0.18427		0.01263	0.10942	0.11685	5.12575e-08	0.11685		0.166	0.20838	0.00565	0.21927	1.77881e-09	0.22492
0.23117	0.19377	0.1415	0.03796	0.18526		0.56322	0.23406	0.00116	0.20495	0.00768	0.21378		0.22426	0.27176	0.15297	0.08829	0.24412		0.22426	0.15431	9.77817e-05	0.15251	0.01464	0.16724		0.07518	0.12035	0.12664	2.27741e-11	0.12664		0.23586	0.23002	0.00283	0.22992	7.55733e-09	0.23275
0.30082	0.20223	0.15629	0.03218	0.19428		0.62059	0.21209	0.00053944	0.18817	0.00891	0.19762		0.2936	0.25463	0.16461	0.07553	0.243		0.2936	0.13855	2.84441e-05	0.12814	0.01904	0.14721		0.13774	0.13748	0.13684	2.17254e-16	0.13684		0.30572	0.24178	0.00134	0.23358	3.01083e-08	0.23492
0.37046	0.20647	0.17144	0.02583	0.20308		0.67796	0.19193	0.00023747	0.16696	0.01028	0.17748		0.36293	0.25331	0.17553	0.06035	0.23875		0.36293	0.11149	7.52234e-06	0.10255	0.02437	0.12693		0.2003	0.15427	0.14739	6.58642e-24	0.14739		0.37558	0.23061	0.000594839	0.22992	1.12482e-07	0.23051
0.44011	0.21871	0.1866	0.01932	0.21173		0.73534	0.18043	9.91331e-05	0.14316	0.0118	0.15505		0.43226	0.24644	0.18524	0.04435	0.23245		0.43226	0.10824	1.80858e-06	0.07817	0.03068	0.10886		0.26285	0.1688	0.15818	3.62848e-35	0.15818		0.44544	0.22778	0.000249098	0.21927	3.94054e-07	0.21952
0.50975	0.21854	0.20132	0.01309	0.22022		0.79271	0.16046	3.92558e-05	0.11863	0.01345	0.13212		0.50159	0.20977	0.19318	0.02931	0.22534		0.50159	0.09732	3.9532e-07	0.05676	0.03802	0.09478		0.32541	0.16931	0.16907	5.00205e-52	0.16907		0.5153	0.21561	9.82359e-05	0.20261	1.29452e-06	0.20271
0.5794	0.22458	0.21503	0.00755	0.22839		0.85008	0.12503	1.47435e-05	0.09501	0.01524	0.11026		0.57092	0.21261	0.19875	0.01679	0.2184		0.57092	0.09793	7.85569e-08	0.03926	0.04635	0.08561		0.38796	0.18343	0.1799	2.81783e-77	0.1799		0.58516	0.19113	3.64837e-05	0.18139	3.98784e-06	0.18143
0.64904	0.22207	0.22707	0.00298	0.23585		0.90745	0.10043	5.2518e-06	0.07353	0.01716	0.09069		0.64025	0.22746	0.20135	0.00767	0.21189		0.64025	0.08026	1.4192e-08	0.02586	0.05561	0.08147		0.45052	0.19947	0.19047	4.3492e-115	0.19047		0.65502	0.16263	1.27602e-05	0.15734	1.15198e-05	0.15736
0.71869	0.23446	0.23667	-0.000481803	0.242		0.96482	0.08087	1.7743e-06	0.055	0.01921	0.0742		0.70958	0.18811	0.20043	0.00197	0.20526		0.70958	0.08264	2.33094e-09	0.01623	0.06563	0.08186		0.51307	0.21005	0.20054	1.03391e-171	0.20054		0.72487	0.14955	4.20285e-06	0.13223	3.12057e-05	0.13227
0.78833	0.2449	0.24303	-0.00287	0.24596		1.0222	0.05013	5.68421e-07	0.03975	0.02137	0.06112		0.77892	0.20912	0.19552	-0.00102	0.19737		0.77892	0.09292	3.4805e-10	0.0097	0.07623	0.08593		0.57563	0.21717	0.20985	1.65362e-256	0.20985		0.79473	0.12586	1.30365e-06	0.10767	7.92682e-05	0.10775
0.85798	0.25235	0.24532	-0.00435	0.24677		1.07957	0.02084	1.72746e-07	0.02777	0.02363	0.0514		0.84825	0.20357	0.18639	-0.0023	0.18695		0.84825	0.09347	4.72473e-11	0.00552	0.08712	0.09264		0.63818	0.22127	0.21809	0	0.21809		0.86459	0.07708	3.80807e-07	0.08495	0.000188818	0.08514
0.92763	0.24038	0.24282	-0.00517	0.24346		1.13694	0.02235	4.97919e-08	0.01875	0.02597	0.04472		0.91758	0.17374	0.17305	-0.00273	0.17318		0.91758	0.10006	5.83094e-12	0.00299	0.09796	0.10095		0.70074	0.22039	0.22492	0	0.22492		0.93445	0.07708	1.04756e-07	0.06493	0.000421759	0.06535
0.99727	0.22753	0.23499	-0.00556	0.23524		1.19431	0.0203	1.36119e-08	0.01223	0.02837	0.0406		0.98691	0.14987	0.15587	-0.00284	0.15589		0.98691	0.12538	6.54222e-13	0.00155	0.10839	0.10993		0.76329	0.22793	0.23	0	0.23		1.00431	0.0445	2.71382e-08	0.04809	0.000883413	0.04897
1.06692	0.2204	0.2216	-0.00573	0.22168		1.25169	0.02423	3.52849e-09	0.00771	0.0308	0.03851		1.05624	0.16054	0.1356	-0.00286	0.1356		1.05624	0.10932	6.67325e-14	0.000760524	0.118	0.11876		0.82585	0.23438	0.23299	0	0.23299		1.07417	0.0445	6.62084e-09	0.03451	0.00174	0.03624
1.13656	0.2109	0.20281	-0.00578	0.20283		1.30906	0.02695	8.67698e-10	0.0047	0.03324	0.03794		1.12557	0.11724	0.11332	-0.00286	0.11332		1.12557	0.10736	6.18834e-15	0.000356359	0.1264	0.12676		0.8884	0.24461	0.23354	0	0.23354		1.14403	0	1.52116e-09	0.02399	0.0032	0.02719
1.20621	0.19017	0.17931	-0.0058	0.17932		1.36643	0.02778	2.02377e-10	0.00277	0.03565	0.03842		1.19491	0.0718	0.09041	-0.00286	0.09041		1.19491	0.1204	5.21719e-16	0.000159048	0.13323	0.13339		0.95096	0.23253	0.23137	0	0.23137		1.21389	0.0445	3.29127e-10	0.01616	0.00552	0.02168
1.27585	0.1426	0.15231	-0.0058	0.15231		1.4238	0.03825	4.47676e-11	0.00157	0.03801	0.03958		1.26424	0.0718	0.06833	-0.00286	0.06833		1.26424	0.13327	3.99874e-17	6.76135e-05	0.13818	0.13825		1.01351	0.22142	0.22626	0	0.22626		1.28375	0	6.7063e-11	0.01055	0.00894	0.01949
1.3455	0.12599	0.12346	-0.0058	0.12346		1.48117	0.04097	9.39245e-12	0.000865692	0.04027	0.04114		1.33357	0.04145	0.04842	-0.00286	0.04842		1.33357	0.14219	2.78634e-18	2.73781e-05	0.14101	0.14104		1.07607	0.21656	0.21809	0	0.21809		1.3536	0.02542	1.28686e-11	0.00667	0.01358	0.02025
1.41514	0.07968	0.09469	-0.0058	0.09469		1.53855	0.04487	1.86845e-12	0.000460044	0.04242	0.04288		1.4029	0.04145	0.03173	-0.00286	0.03173		1.4029	0.15092	1.76511e-19	1.05594e-05	0.14159	0.1416		1.13862	0.20101	0.20685	0	0.20685		1.42346	0.02563	2.32546e-12	0.00409	0.01934	0.02342
1.48479	0.05634	0.06795	-0.0058	0.06795		1.59592	0.04597	3.52626e-13	0.000236289	0.0444	0.04464		1.47223	0.04145	0.01878	-0.00286	0.01878		1.47223	0.13825	1.01656e-20	3.87918e-06	0.13989	0.1399		1.20118	0.18204	0.19272	0	0.19272		1.49332	0.0445	3.95744e-13	0.00243	0.02583	0.02825
1.55443	0.05901	0.04486	-0.0058	0.04486		1.65329	0.04568	6.3119e-14	0.000117287	0.04619	0.04631		1.54156	0	0.00956	-0.00286	0.00956		1.54156	0.13714	5.32258e-22	1.35739e-06	0.136	0.136		1.26373	0.1796	0.17601	0	0.17601		1.56318	0.03546	6.34234e-14	0.00139	0.03234	0.03374
1.62408	0.01536	0.02646	-0.0058	0.02646		1.71066	0.04686	1.07156e-14	5.62623e-05	0.04777	0.04782		1.61089	0	0.0036	-0.00286	0.0036		1.61089	0.13145	2.53358e-23	4.52414e-07	0.13009	0.13009		1.32629	0.14803	0.15724	0	0.15724		1.63304	0.03986	9.57221e-15	0.000777241	0.03798	0.03876
1.69373	0.00984	0.01303	-0.0058	0.01303		1.76804	0.04836	1.72482e-15	2.60788e-05	0.0491	0.04912		1.68023	0	0.000145072	-0.00286	0.000145072		1.68023	0.12857	1.09641e-24	1.43626e-07	0.12244	0.12244		1.38884	0.14114	0.13705	0	0.13705		1.7029	0.04021	1.36052e-15	0.000419625	0.04183	0.04225
1.76337	0	0.00415	-0.0058	0.00415		1.82541	0.05131	2.63403e-16	1.16836e-05	0.05015	0.05017		1.74956	0	-0.00163	-0.00286	-0.00163		1.74956	0.11057	4.31355e-26	4.34302e-08	0.1134	0.1134		1.4514	0.12624	0.11623	0	0.11623		1.77276	0.04562	1.82108e-16	0.000219503	0.04319	0.04341
1.83302	0	-0.00111	-0.0058	-0.00111		1.88278	0.05252	3.81511e-17	5.05857e-06	0.05092	0.05093		1.81889	0	-0.00243	-0.00286	-0.00243		1.81889	0.11283	1.54285e-27	1.25089e-08	0.10334	0.10334		1.51395	0.11809	0.09562	0	0.09562		1.84262	0.04025	2.29551e-17	0.000111248	0.04183	0.04194
1.90266	0	-0.00386	-0.0058	-0.00386		1.94015	0.05356	5.2409e-18	2.11661e-06	0.05139	0.05139		1.88822	0	-0.00273	-0.00286	-0.00273		1.88822	0.10857	5.01691e-29	3.4317e-09	0.09266	0.09266		1.57651	0.06463	0.07605	0	0.07605		1.91247	0.03865	2.72496e-18	5.46278e-05	0.03798	0.03804
1.97231	0	-0.00511	-0.0058	-0.00511		1.99752	0.05625	6.82836e-19	8.55886e-07	0.05155	0.05155		1.95755	0	-0.00283	-0.00286	-0.00283		1.95755	0.08571	1.48312e-30	8.96737e-10	0.08175	0.08175		1.63907	0.04463	0.05825	0	0.05825		1.98233	0.03124	3.04626e-19	2.59901e-05	0.03234	0.03237
2.04195	0	-0.0056	-0.0058	-0.0056		2.0549	0.05497	8.43486e-20	3.34411e-07	0.05139	0.05139		2.02688	0	-0.00286	-0.00286	-0.00286		2.02688	0.08283	3.98599e-32	2.23196e-10	0.07096	0.07096		1.70162	0.04312	0.04279	0	0.04279		2.05219	0	3.20706e-20	1.19805e-05	0.02583	0.02584
2.1116	0	-0.00575	-0.0058	-0.00575		2.11227	0.05245	9.88569e-21	1.26292e-07	0.05092	0.05092		2.09622	0	-0.00286	-0.00286	-0.00286		2.09622	0.02948	9.73931e-34	5.29143e-11	0.06062	0.06062		1.76418	0.0315	0.03001	0	0.03001		2.12205	0.03125	3.17962e-21	5.35074e-06	0.01934	0.01934
						2.16964	0.05056	1.09887e-21	4.60929e-08	0.05015	0.05015
						2.22701	0.02825	1.15851e-22	1.62575e-08	0.0434	0.0434
						2.28438	0.04097	1.15841e-23	5.54161e-09	0.04232	0.04232
						2.34175	0.03845	1.0986e-24	1.82549e-09	0.04104	0.04104

## Sheet: Panel_ABC_bar graph
wild type																	scyl-1(zw99)																	scyl-1(zw99) rescue
				open						Closed												open					closed											open						closed
Filename	P(open)	Amplitude	Conductance	tau1	amp1	area1	tau2	amp2	area2	tau1	area1	tau2	area2	tau3	area3		Filename	P(open)	Amplitude	Conductance	tau1	amp1	area1	tau2	amp2	area2	tau1	area1	tau2	area2	tau3	area3		Filename	P(open)	Amplitude	Conductance	tau1	amp1	area1	tau2	amp2	area2	tau1	area1	tau2	area2	tau3	area3
2019_05_15_0004	61.0945	4.12549	137.516	0.8632	2.24432	15.362	5.623	17.4313	84.638	0.123	32.56	4.325	36.35	89.62	31.09		2019_05_14_0003	27.643	3.09919	103.306	1.023	6.138	20.52	3.756	30.048	79.48	0.125	15.26	1.234	35.62	12.52	49.12		2019_05_15_0007	82.0715	4.39361	146.454	0.2468	0.81444	6.3522	6.352	19.056	93.6478	0.3523	25.362	1.5252	64.562	50.8522	10.076
2019_05_15_0006	88.9455	3.84501	128.167	0.7856	2.04256	16.23	4.365	13.5315	83.77	0.252	30.85	3.35	33.396	128.36	35.754		2019_05_15_0005	38.3873	3.89333	129.778	1.2321	7.3926	24.55	3.689	29.512	75.45	0.243	14.85	1.1265	34.25	13.24	50.9		2019_05_16_0023	85.2317	3.33253	111.084	0.5462	1.80246	8.5621	4.6652	13.9956	91.4379	0.4523	30.52	1.6255	58.95	48.855	10.53
2019_05_16_0010	89.892	3.55924	118.641	0.9562	2.48612	10.26	7.326	22.7106	89.74	0.3456	34.56	3.352	39.56	123.56	25.88		2019_05_15_0008	39.6223	3.61859	120.62	0.93232	5.59392	23.256	3.521	28.168	76.744	0.252	13.885	1.258	36.52	14.25	49.595		2019_05_16_0024	79.951	3.43868	114.623	0.6451	2.12883	4.325	7.6223	22.8669	95.675	0.152	25.562	1.4825	68.92	45.855	5.518
2019_05_16_0022	82.291	3.18456	106.152	1.0232	2.66032	12.34	5.23596	16.2315	87.66	0.532	37.62	3.456	40.52	86.625	21.86		2019_05_16_0010	16.6877	3.76963	125.654	1.235	7.41	26.2	3.4592	27.6736	73.8	0.239	15.93	0.895	37.55	10.25	46.52		2019_05_16_0029	80.1927	3.22573	107.524	0.2315	0.76395	3.562	8.5221	25.5663	96.438	0.0195	26.8962	1.7822	67.552	52.522	5.55175
2019_05_16_0028	84.2792	3.08647	102.882	0.9923	2.57998	13.562	4.2345	13.127	86.438	0.285	36.27	3.865	35.62	79.358	28.11		2019_05_16_0025	41.1956	3.28464	109.488	1.0865	6.519	27.52	3.623	28.984	72.48	0.351	18.55	0.956	39.5562	18.52	41.8938		2019_05_17_0026	50.9499	4.17465	139.155	0.0123	0.04059	5.325	5.16823	15.5047	94.675	0.25758	27.81	1.70322	63.26	49.27	8.93
2019_05_17_0000	83.4979	3.83058	127.686	0.9532	2.47832	15.23	4.5324	14.0504	84.77	0.563	29.86	2.896	39.685	75.16	30.455		2019_05_16_0026	59.8226	3.64484	121.495	1.235	7.41	28.54	3.586	28.688	71.46	0.55	17.52	1.025	34.25	14.25	48.23		2019_05_17_0016	42.0795	3.48483	116.161	0.3142	1.03686	3.356	4.3215	12.9645	96.644	0.53225	25.5625	1.89523	63.5654	51.522	10.8721
2019_05_17_0001	86.0564	3.9588	131.96	0.6785	1.7641	12.652	5.458	16.9198	87.348	0.4235	30.56	3.562	38.65	66.289	30.79		2019_05_16_0030	56.4355	3.50487	116.829	1.3855	8.313	25.565	3.8652	30.9216	74.435	0.1852	16.85	1.125	32.56	22.15	50.59		2019_05_17_0024	37.2116	3.31538	110.513	0.0256	0.08448	8.6223	3.54621	10.6386	91.3777	0.2585	26.5622	1.92352	62.5822	48.8522	10.8556
2019_05_17_0002	85.6375	3.34803	111.601	1.1112	2.88912	14.32	6.234	19.3254	85.68	0.256	35.78	2.765	37.52	129.36	26.7		2019_05_16_0032	34.2042	3.6816	122.72	1.16001	6.96006	26.86	3.82212	30.577	73.14	0.2563	16.29	1.10794	36.26	10.695	47.45		2019_05_17_0025	57.3706	3.38241	112.747	0.4352	1.43616	2.54512	4.325	12.975	97.4549	0.38923	28.6933	1.68522	56.632	49.5562	14.6747
2019_05_13_0012	38.3932	2.97816	99.272	0.9654	2.51004	12.36	5.368	16.6408	87.64	0.458	37.65	2.856	35.298	156.352	27.052		2019_05_17_0010	24.24	2.94703	98.2343	0.8662	5.1972	26.81	3.9455	31.564	73.19	0.128	18.652	1.355	35.258	9.565	46.09		2019_05_17_0037	85.4985	3.95427	131.809	0.551	1.8183	4.352	4.1852	12.5556	95.648	0.18552	29.5626	2.052	55.582	53.532	14.8554
2019_05_17_0004	79.2487	3.35403	111.801	0.8632	2.24432	14.36	6.2685	19.4323	85.64	0.345	35.68	2.963	41.25	128.44	23.07		2019_05_17_0011	28.3324	3.72791	124.264	1.0751	6.4506	27.5621	4.052	32.416	72.4379	0.1789	14.28	0.862	34.25	10.558	51.47		2019_05_17_0038	72.0675	3.78689	126.23	0.3426	1.13058	3.8562	3.562	10.686	96.1438	0.18522	30.522	1.5526	60.5652	51.8522	8.9128
2019_05_17_0005	76.2983	3.39008	113.003	0.9812	2.55112	13.7086	3.0124	9.33844	86.2914	0.38259	33.74	3.28281	37.88	111.235	28.38		2019_05_17_0017	52.5387	3.28498	109.499	1.18965	7.1379	23.55	3.862	30.896	76.45	0.235	15.62	0.963	36.27	11.25	48.11		2019_05_17_0039	40.618	3.51367	117.122	0.142	0.4686	4.23525	6.6223	19.8669	95.7648	0.14235	31.852	1.6852	60.8952	48.5856	7.2528
2019_05_17_0021	80.7845	4.06986	135.662	0.7624	1.98224	15.68	5.62	17.422	84.32	0.523	33.58	3.058	40.52	89.65	25.9		2019_05_17_0018	18.3508	3.29562	109.854	1.285	7.71	29.552	4.152	33.216	70.448	0.388	16.385	1.1852	35.185	10.85	48.43
2019_05_17_0022	69.093	3.60612	120.204	0.8652	2.24952	14.362	5.892	18.2652	85.638	0.423	36.21	3.62	35.85	85.62	27.94		2019_05_17_0026	43.8304	3.28719	109.573	0.96322	5.77932	25.62	4.325	34.6	74.38	0.482	17.695	1.2785	38.256	14.256	44.049
2019_05_17_0023	44.6956	3.5309	117.697	0.8634	2.24484	14.38	6.522	20.2182	85.62	0.285	34.85	3.127	37.19	72.636	27.96		2019_05_17_0027	35.0189	3.37046	112.349	1.08655	6.51931	26.55	3.862	30.896	73.45	0.1552	16.85	1.1889	39.544	10.582	43.606
																	2019_05_17_0028	34.9516	3.11962	103.987	1.352	8.112	0.555	3.762	30.096	99.445	0.1082	17.52	1.086	37.251	9.36	45.229
