# Supplementary material for: Slo2 potassium channel function depends on RNA editing-regulated expression of a SCYL1 protein
Source: eLife. 2020 Apr 21;9:e53986. doi: 10.7554/eLife.53986 (PMC7195191; doi:10.7554/eLife.53986)
Supplement: Figure 10—source data 1. [file elife-53986-fig10-data1.xlsx]

## Sheet: Panel_A
		wild type							adr-1(zw96)
Genomic coordinates		edited	non-edited	total	edited%	average	SE		edited	non-edited	total	edited%	average	SE
V: 13037089	RNA_Seq1	22	46	68	0.323529	0.343676	0.0965116		7	7	14	0.5	0.34963	0.100093
	RNA_Seq2	13	12	25	0.52				4	21	25	0.16
	RNA_Seq3	6	26	32	0.1875				7	11	18	0.388889
V: 13037104	RNA_Seq1	45	11	56	0.803571	0.87619	0.0422745		11	2	13	0.846154	0.885226	0.0583531
	RNA_Seq2	19	1	20	0.95				17	4	21	0.809524
	RNA_Seq3	21	3	24	0.875				14	0	14	1
V: 13037113	RNA_Seq1	3	10	13	0.230769	0.480963	0.129899		0	4	4	0	0.25	0.144338
	RNA_Seq2	2	1	3	0.666667				3	3	6	0.5
	RNA_Seq3	6	5	11	0.545455				1	3	4	0.25
V: 13038599	RNA_Seq1	2	13	15	0.133333	0.302222	0.0898833		3	4	7	0.428571	0.328616	0.0507707
	RNA_Seq2	2	4	6	0.333333				5	12	17	0.294118
	RNA_Seq3	11	14	25	0.44				5	14	19	0.263158
V: 13038607	RNA_Seq1	17	29	46	0.369565	0.319176	0.02523		6	9	15	0.4	0.292857	0.0539274
	RNA_Seq2	7	17	24	0.291667				9	27	36	0.25
	RNA_Seq3	16	38	54	0.296296				8	27	35	0.228571
V: 13038608	RNA_Seq1	11	36	47	0.234043	0.160236	0.0445843		3	12	15	0.2	0.174854	0.0128256
	RNA_Seq2	2	23	25	0.08				6	30	36	0.166667
	RNA_Seq3	9	45	54	0.166667				6	32	38	0.157895
V: 13038628	RNA_Seq1	21	89	110	0.190909	0.195851	0.0310363		11	24	35	0.314286	0.289897	0.0397786
	RNA_Seq2	11	65	76	0.144737				14	52	66	0.212121
	RNA_Seq3	33	98	131	0.251908				23	44	67	0.343284
V: 13038636	RNA_Seq1	56	84	140	0.4	0.418351	0.0143346		5	43	48	0.104167	0.1033	0.00250626
	RNA_Seq2	46	57	103	0.446602				7	64	71	0.0985915
	RNA_Seq3	58	84	142	0.408451				9	75	84	0.107143

## Sheet: Panel G
GFP intensity
	wild type			adr-1(zw96)
1	75.7619		1	40.671
2	83.3201		2	48.3197
3	119.673		3	46.6211
4	93.9846		4	43.7542
5	104.168		5	53.1444
6	102.845		6	55.4359
7	102.523		7	28.0928
8	110.285		8	53.722
9	109.042		9	44.5926
10	98.7088		10	50.2659
11	100.442		11	48.7992
12	91.3014		12	72.9243
13	104.968		13	58.8429
14	94.5726		14	51.9794
15	109.338		15	52.6231
16	99.0667		16	57.2895
			17	54.9881
			18	48.0092
			19	46.864
average	100			50.3652
n	16			19
SE	2.68329			2.02907
