# Supplementary material for: Slo2 potassium channel function depends on RNA editing-regulated expression of a SCYL1 protein
Source: eLife. 2020 Apr 21;9:e53986. doi: 10.7554/eLife.53986 (PMC7195191; doi:10.7554/eLife.53986)
Supplement: Figure 11—source data 1. [file elife-53986-fig11-data1.xlsx]

## Sheet: Panel_A_trace
time(ms)	Slack	Slack+SCYL1
1	-0.38391	0.67461
2	-0.64635	0.23212
3	-0.33505	0.7723
4	0.10441	0.60142
5	0.08306	0.65332
6	0.16547	0.50685
7	-0.12138	0.50687
8	-0.34414	0.32683
9	0.20824	0.43366
10	-0.72254	0.51607
11	-0.38073	0.28416
12	-0.17014	-0.08814
13	0.0618	0.68092
14	-0.4051	0.58938
15	-0.34405	0.64738
16	-0.83843	0.56195
17	0.02829	0.56807
18	-0.13344	0.53147
19	-0.21278	0.33312
20	-0.40503	0.7024
21	-0.5515	0.1531
22	-0.63388	0.56815
23	-0.5942	0.38201
24	-0.49958	0.9405
25	0.01313	0.69333
26	0.09554	0.23558
27	-0.56058	0.71472
28	-0.78944	0.62013
29	-0.07227	0.65677
30	-0.29503	0.6751
31	-0.9481	0.81855
32	-0.29196	0.48898
33	-0.20039	0.38523
34	-0.13019	0.42187
35	-0.22173	0.42189
36	-0.27054	0.73929
37	-0.24306	0.4677
38	-0.59095	0.5318
39	-0.56652	0.57454
40	-0.61229	0.62034
41	-0.301	0.88891
42	-0.28572	0.5868
43	0.0042	0.39761
44	0.11103	0.68449
45	-0.28874	0.53802
46	-0.34671	0.62654
47	-0.50844	-0.01431
48	0.01342	0.77001
49	-0.30089	0.52588
50	-0.51145	0.5198
51	-0.22457	0.91349
52	-0.19404	0.79144
53	-0.46259	0.68769
54	-0.12993	0.29098
55	-0.0994	0.66636
56	0.00132	-0.3346
57	-0.74635	0.58705
58	-0.39233	0.94412
59	-0.18175	0.44671
60	-0.41367	0.36432
61	-0.57845	0.78548
62	-0.44721	0.37351
63	-3.89874	0.4895
64	-7.51201	0.54139
65	-7.4418	0.74893
66	-7.19155	0.59941
67	-5.20484	0.89545
68	-2.74206	0.42244
69	-0.26707	0.44687
70	-0.17245	0.54149
71	-0.39216	0.74903
72	-0.48981	0.59341
73	-0.53557	0.74906
74	-0.2548	0.19671
75	-0.26699	1.08479
76	-0.29139	0.51108
77	-0.30359	0.40428
78	-0.55382	0.73694
79	-0.3646	0.36464
80	-0.03805	0.38602
81	-0.22419	0.60882
82	-2.64117	0.53559
83	-0.41948	0.20297
84	-2.28714	0.74925
85	-8.04885	0.28235
86	-7.40796	0.89577
87	-7.56969	0.60892
88	-7.45066	0.39531
89	-7.59713	0.56623
90	-7.55135	0.73409
91	-6.68769	0.58152
92	-7.57879	0.62121
93	-7.87784	0.78297
94	-7.83206	0.62429
95	-7.85951	0.60295
96	-7.15759	0.28864
97	-6.92565	0.74031
98	-8.0914	0.74338
99	-5.061	0.49926
100	-5.71711	0.1178
101	-4.97857	0.52981
102	-5.09453	0.46269
103	-7.61221	0.15142
104	-6.8218	0.60005
105	-2.17396	0.23996
106	-7.24902	0.38036
107	-6.68443	0.14234
108	-5.99167	0.44142
109	-6.73933	0.6337
110	-2.74457	-0.39778
111	-1.75884	-0.28484
112	-7.26115	0.53304
113	-7.17263	0.13938
114	-7.40455	0.3042
115	-6.79724	0.25233
116	-5.74132	0.36221
117	-5.95798	-0.16572
118	-7.37704	0.39276
119	-7.80122	-6.02507
120	-6.82769	-6.59573
121	-5.50932	-7.53565
122	-6.61405	-6.58044
123	-6.98635	-7.28538
124	-6.87037	-6.68721
125	-6.94665	-6.85504
126	-5.35972	-6.68413
127	-7.48678	-5.86014
128	-3.33943	-6.39723
129	-7.06867	-6.22631
130	-7.13579	-6.0493
131	-6.53153	-6.46737
132	-7.50198	-6.1225
133	-6.07985	-5.20391
134	-6.74207	0.12448
135	-6.62303	0.17027
136	-5.98215	-1.49292
137	-6.93429	0.38698
138	-5.08796	0.41751
139	-5.10321	0.18865
140	-7.00139	0.48774
141	-7.7338	0.22225
142	-7.43776	0.45725
143	-7.46216	0.32299
144	-7.8009	0.46034
145	-7.0471	0.40237
146	-7.22104	0.03008
147	-6.90364	0.87848
148	-8.85065	-2.09697
149	-7.61468	0.11863
150	-7.45902	0.08202
151	-6.18338	-0.25671
152	-7.27589	0.84805
153	-6.22913	0.25602
154	-7.39794	-0.13153
155	-4.79478	-0.33293
156	-5.19149	0.17062
157	-7.38264	-0.29933
158	-7.0805	-0.04907
159	-7.42839	0.62539
160	-2.81717	0.46366
161	-8.02346	0.86041
162	-7.57484	0.42402
163	-6.81188	0.41488
164	-7.12925	0.38133
165	-7.52292	0.5614
166	-7.15669	-0.56468
167	-4.935	0.17691
168	-6.94915	0.78423
169	-7.70902	0.53705
170	-7.46182	-0.46696
171	-7.50453	0.43943
172	-7.65711	0.37231
173	-6.88195	0.47914
174	-7.09556	0.63174
175	-6.75375	0.42119
176	-7.95307	-0.08539
177	-7.85541	0.46089
178	-5.98772	0.64402
179	-7.52884	0.2473
180	-7.22976	0.66541
181	-7.40675	0.22903
182	-7.41894	-0.69259
183	-7.31212	0.16803
184	-7.33041	0.86079
185	-7.22054	0.20773
186	-8.25812	0.27489
187	-0.41204	0.3573
188	-6.16764	0.58315
189	-8.03836	0.51908
190	-7.68129	-0.07905
191	-6.6742	0.60456
192	-6.00585	-0.01493
193	-7.71787	0.19871
194	-7.40658	0.46728
195	-5.49311	0.61684
196	-7.48895	0.1713
197	-6.97014	-3.60982
198	-5.80436	-6.27704
199	-7.40346	-2.81632
200	-8.03516	-5.55984
201	-7.14099	-6.43262
202	-7.27525	-6.73168
203	-6.3353	-1.7695
204	-3.82369	-4.06136
205	-7.11652	-3.52728
206	-5.32513	-1.87932
207	-7.31791	-2.7399
208	-7.11953	-5.08973
209	-6.86623	0.39734
210	-4.99549	-0.09702
211	-5.09008	-0.97591
212	-2.0322	0.42791
213	-3.97311	-0.53032
214	-7.22017	-0.3533
215	-6.58234	-5.67555
216	-7.32085	-5.61145
217	-1.58048	-5.86778
218	-7.46426	-4.55856
219	-6.49378	-5.79756
220	-7.39709	-5.86468
221	-7.79076	-5.39774
222	-7.06137	-5.76699
223	-5.89254	-2.57178
224	-6.982	-5.44042
225	-5.58428	-5.54111
226	-6.56083	-5.67537
227	-4.55582	-5.30914
228	-7.8517	-5.43425
229	-6.85681	-6.14224
230	-6.51501	-4.10975
231	-7.94321	-5.96215
232	-6.24642	-6.41379
233	-7.47627	-6.39241
234	-0.28632	-5.38532
235	-0.08489	-5.9865
236	0.03414	-5.67215
237	-0.50295	-4.12489
238	0.000600815	-5.75146
239	-0.14587	-5.76976
240	-0.16722	-5.35775
241	-0.21909	-0.28876
242	-0.38387	0.09883
243	-0.71955	0.56881
244	-0.57	0.22703
245	-0.16716	0.52307
246	0.20822	0.81606
247	-0.03285	0.75504
248	-0.30445	0.60552
249	-0.40209	0.42853
250	-0.57298	0.42245
251	-0.71029	-0.12685
252	-0.16401	0.34008
253	-0.2403	0.13563
254	-0.23723	0.06546
255	-0.2067	0.21196
256	-0.51797	0.21503
257	-0.52711	0.34017
258	-0.18835	-0.1542
259	-0.39891	0.47753
260	-1.77219	0.37379
261	-0.37447	0.12966
262	-0.48127	0.37687
263	-0.16998	0.16021
264	-0.70707	0.16633
265	-0.4324	-0.01065
266	-0.0967	0.06566
267	-0.1211	0.32508
268	-0.69176	0.60585
269	-0.54221	0.54178
270	0.0712	0.05352
271	-0.43233	0.20307
272	-0.34992	0.84396
273	-1.44854	0.72496
274	-0.22477	0.35876
275	-0.07827	0.76161
276	-0.30104	0.30081
277	-0.43835	0.09941
278	-0.56651	0.61213
279	-0.34677	0.18184
280	-0.36202	0.8624
281	-0.74653	0.59692
282	-0.67327	0.64271
283	-0.95402	-0.71836
284	-0.44131	0.18498
285	-0.93874	-0.12323
286	0.0653	0.17586
287	-0.20934	-0.06521
288	-0.44126	0.8839
289	-0.51144	0.19727
290	0.09892	0.64895
291	-0.24286	0.26444
292	-0.13604	-0.12616
293	-0.55411	0.35603
294	0.0532	0.34689
295	0.13256	0.35606
296	-0.14209	0.68567
297	-0.17564	0.37441
298	-0.35569	0.83829
299	-0.29464	0.26763
300	-0.46552	0.55146
301	-0.48687	0.3287
302	-0.24272	0.79563
303	-0.54788	0.44775
304	-0.25185	0.48134
305	-0.4441	0.48441
306	0.19984	0.26164
307	-0.39829	0.97272
308	0.09	0.53634
309	-0.12971	0.42039
310	-0.51422	0.23425
311	-0.09917	0.24647
312	-0.11442	0.00235
313	-0.77969	0.21599
314	-0.10218	0.36859
315	-0.51721	0.32283
316	-0.52025	0.41135
317	-0.25779	-0.32106
318	-0.13875	0.24354
319	-0.34626	-0.01585
320	-0.32794	0.23136
321	-0.40727	0.34735
322	-0.3035	0.30464
323	-0.39504	0.19174
324	-0.1753	0.23143
325	-0.1997	0.10327
326	-0.49266	0.02699
327	-0.41025	-0.10727
328	-0.37056	-0.30561
329	-0.08063	0.21931
330	-0.20879	0.07284
331	-0.14774	0.27427
332	-0.33389	-0.08582
333	-0.24232	-0.21092
334	-0.34302	-0.1987
335	-0.5078	-0.94942
336	-0.24534	0.29877
337	-0.42843	-0.20781
338	-0.31245	0.25303
339	-0.06219	-0.45496
340	-0.32158	0.27442
341	0.17892	0.44534
342	-0.06215	-1.00728
343	-0.20862	-7.00702
344	-0.19335	-6.0396
345	-0.15977	-6.83609
346	-0.03158	-6.39357
347	-0.11092	-7.2572
348	-0.64496	-4.70286
349	-0.33977	-1.98373
350	-0.43436	-4.55939
351	-0.08035	-4.39458
352	-0.41298	-6.63761
353	-0.28174	-6.48806
354	-0.28173	-6.52466
355	-0.38852	-7.61412
356	-0.36105	-6.97934
357	-0.46784	-6.02412
358	-0.39459	-6.76568
359	-0.29082	-6.53373
360	-0.07108	-5.42287
361	-0.19008	-6.70154
362	0.17309	-1.40062
363	-0.0863	0.39688
364	-0.62034	-0.05476
365	-0.24191	-0.29584
366	-0.39449	-5.42888
367	-0.49518	-0.7322
368	-0.12896	-1.26319
369	-0.11369	-0.38122
370	-0.18692	-0.56431
371	-0.0038	-6.71053
372	-0.10144	-6.63727
373	-0.23265	-7.87322
374	-0.11362	-6.40531
375	-0.15939	-6.32594
376	-0.0251	-7.43677
377	-0.26617	-0.11253
378	-0.49809	-4.39718
379	-0.1929	-5.77961
380	-0.6415	-1.01885
381	0.1123	-7.48856
382	-0.01892	-6.35024
383	-0.55906	0.58337
384	-0.34238	0.38197
385	-0.09517	-0.01779
386	-0.22028	0.03716
387	-0.20196	-0.09405
388	-0.27213	0.54989
389	-0.55899	0.49497
390	-0.16225	0.32104
391	-0.31787	0.38514
392	-0.25377	0.5408
393	-0.13779	0.54997
394	-0.45822	0.20819
395	-0.48262	-0.13054
396	-0.33002	-0.18545
397	-0.10112	0.4768
398	-0.57108	0.33948
399	-0.27505	0.49209
400	-0.78162	0.69047
401	0.04541	0.19
402	0.16445	0.24495
403	-0.37875	-0.03275
404	-0.29024	0.40672
405	-0.3238	0.91028
406	-0.22308	0.47389
407	-0.10404	0.40067
408	-0.57095	0.19622
409	-0.00636	0.73334
410	-0.73267	0.75778
411	-0.46105	0.21458
412	-0.3054	0.01623
413	-0.27487	0.13832
414	-0.23823	0.04678
415	0.19818	0.54118
416	-0.27483	0.25739
417	-0.29923	-0.82597
418	-0.07949	-0.05996
419	-0.25343	0.30932
420	-0.08252	0.42835
421	-0.27171	0.72134
422	-0.22592	0.40092
423	-0.27779	-0.32843
424	-0.02753	0.55049
425	-1.08648	0.52915
426	-0.51884	0.20568
427	-0.26553	0.224
428	-0.30519	0.6238
429	-0.36621	0.32474
430	-0.28991	0.36138
431	-0.48215	-0.05974
432	-0.10067	0.60861
433	-0.11592	0.43162
434	-0.13727	0.13867
435	-0.27764	0.62087
436	-0.56144	0.21805
437	-0.56448	-0.12983
438	-0.31727	0.31879
439	-0.70483	0.51412
440	-0.47288	-0.01687
441	-0.42099	0.66369
442	-0.64071	0.23951
443	-0.25312	0.21817
444	-0.42401	0.46843
445	-0.64372	0.3891
446	-0.59793	0.68819
447	-6.33827	0.19077
448	-0.43616	-2.29029
449	0.14674	0.45325
450	-0.17063	0.51736
451	-0.15841	0.51738
452	-0.54902	0.54181
453	-0.2652	0.35872
454	-0.21025	0.16647
455	-0.50321	0.56017
456	-0.76565	0.57239
457	0.03393	0.77382
458	-0.86023	0.72806
459	-0.37193	0.02618
460	-0.26511	0.18488
461	-0.25594	0.25509
462	-0.34748	-0.21486
463	-0.19183	-0.1355
464	-0.22233	0.34975
465	-0.33523	0.46878
466	-0.18874	0.6519
467	-0.25891	-0.17816
468	-0.5183	0.43832
469	-0.36265	0.26438
470	-0.22531	-0.08655
471	-0.24361	0.14234
472	-0.36566	0.38955
473	-0.0971	0.4384
474	-0.57926	0.52692
475	-0.20388	0.06612
476	-0.07569	-0.16275
477	-0.71655	0.4995
478	-0.32286	0.34083
479	0.02505	0.23098
480	-0.14889	0.46293
481	-0.05732	0.2127
482	0.01288	0.69795
483	-0.42045	0.28903
484	-0.80496	0.47826
485	-0.88735	0.42334
486	-0.17933	0.16701
487	-0.31664	0.45084
488	-0.56687	0.54851
489	-0.41427	0.51801
490	-0.10298	0.27084
491	-0.28607	0.56077
492	-0.58513	0.24646
493	-0.56986	0.25868
494	-0.31655	0.14578
495	-0.18226	0.46623
496	-0.76208	0.44489
497	0.31825	0.79281
498	-0.35923	0.52732
499	-0.49959	-0.25391
500	-0.19441	0.4297
501	-0.14251	0.27102
502	-0.61552	0.25578
503	-0.62161	0.61285
504	-0.67958	0.16731
505	-0.69178	0.13071
506	-0.31945	0.28331
507	-0.46592	0.32911
508	-0.40487	-0.14085
509	-0.18819	0.24674
510	-0.46283	0.29254
511	-0.21868	0.49092
512	-0.32853	0.30783
513	-0.26138	0.44823
514	-0.05995	-0.07971
515	0.01025	0.29567
516	-0.1881	0.64969
517	-0.39865	0.44829
518	-0.3254	0.37202
519	-0.40473	0.63754
520	-0.1148	0.39952
521	-0.37419	0.26525
522	-0.03238	0.15541
523	-0.31008	0.68338
524	-0.65491	0.25615
525	-0.20934	0.68036
526	-0.35276	-0.03984
527	-0.3497	0.41184
528	-0.21541	-0.20155
529	-0.51752	0.1128
530	-0.51446	0.26541
531	-0.49308	0.64384
532	-0.38626	0.27765
533	-0.48695	0.05489
534	-0.60901	-0.24112
535	-0.19396	0.39672
536	-0.61814	0.18616
537	-0.1329	0.6531
538	-0.4228	0.83012
539	-0.19696	0.76299
540	-0.57536	0.27168
541	0.01669	-0.37223
542	-0.23354	0.17405
543	-0.28541	0.24426
544	-0.31286	0.12221
545	-0.64549	-0.0914
546	0.04117	0.000171661
547	-0.15413	-0.19207
548	-0.46234	0.12228
549	-0.43487	0.50987
550	-0.04728	-0.12488
551	-0.48367	-0.13097
552	-0.60878	0.22915
553	0.41052	-0.13094
554	-0.26085	0.25055
555	-0.19065	0.56795
556	-0.16622	0.1102
557	-0.25776	0.47643
558	-0.13263	0.49171
559	-0.06242	0.26284
560	-0.35843	0.37577
561	-0.44387	0.33307
562	-0.32789	0.93428
563	-0.46215	0.61386
564	0.14516	0.44908
565	0.13602	0.59253
566	-0.56587	0.5895
567	-0.11725	0.24467
568	-0.10198	0.83367
569	-0.60551	0.3393
570	-0.39492	0.58041
571	-0.36134	0.10435
572	-0.3949	0.69946
573	-0.31249	0.54689
574	-0.21787	0.18375
575	-0.12631	0.32109
576	-0.44673	0.43097
577	-0.10187	0.49813
578	-0.04387	0.36997
579	-0.27884	0.71789
580	-0.01333	0.36695
581	-0.51685	0.30288
582	-0.1903	0.58977
583	-0.19334	0.26019
584	-0.1445	0.47078
585	-0.43135	0.44028
586	-0.1048	0.43114
587	-0.3001	0.60206
588	-0.38249	0.25417
589	-0.49539	0.55021
590	-0.34889	0.51971
591	-0.42212	0.34883
592	-0.41906	0.46481
593	-0.2512	0.36412
594	-0.69369	0.0315
595	-0.23591	0.46181
596	-0.37628	0.34281
597	-0.37932	0.58391
598	-0.34879	0.36726
599	-1.05984	0.02548
600	-0.22974	-6.98134
601	-0.29992	-6.81348
602	-0.38536	-6.5266
603	-0.06186	-6.52658
604	-0.28463	-6.05354
605	-0.54401	-6.23968
606	-0.26934	-6.49601
607	-0.57145	-6.54177
608	-0.89798	-4.28956
609	-0.55922	-4.40246
610	-0.32117	-3.78904
611	-0.27538	-4.25899
612	-0.17466	-4.35663
613	-0.38522	-4.38713
614	-0.6446	-5.95572
615	-0.58661	-6.19679
616	-0.26616	-6.3341
617	-0.25089	-6.27305
618	-0.26308	-7.25265
619	-0.36988	-6.09296
620	-0.06469	-6.36455
621	-0.43394	-5.95865
622	-0.20505	-6.87721
623	-0.56819	-6.25464
624	-0.57429	-5.58324
625	-0.37591	-6.29733
626	-6.27494	-0.27925
627	-6.63809	-2.03399
628	-7.21181	-5.61063
629	-6.9585	-3.54153
630	-7.04699	-6.25147
631	-7.73057	-6.48949
632	-7.3735	-7.00522
633	-7.48945	-6.57185
634	-7.49554	-7.112
635	-6.85466	-6.96855
636	-7.52298	-6.33377
637	-7.20254	-5.83326
638	-6.89125	-6.48632
639	-7.32458	-6.43442
640	-7.58092	-6.69686
641	-6.71726	-6.13837
642	-7.31539	-7.00505
643	-5.45075	-6.26041
644	-7.33367	-6.83107
645	-7.97453	-5.48828
646	-8.00503	-6.89817
647	-1.41933	-3.95016
648	-7.12915	-5.21662
649	-8.03246	-6.39764
650	-7.29698	-6.56546
651	-7.49838	-6.66311
652	-7.87984	-6.52576
653	-2.67658	-6.48912
654	-0.53728	-6.58066
655	-0.31449	-4.73738
656	-0.2626	0.32856
657	-0.48536	0.49947
658	-0.3999	0.54527
659	-0.44566	0.7467
660	-0.30222	0.58802
661	-0.85152	0.42019
662	-0.44868	0.37749
663	-0.39068	0.4538
664	0.04268	0.83528
665	-0.57681	0.57895
666	-0.42421	-0.09547
667	-0.70191	0.28907
668	-0.51574	0.63088
669	-0.17698	0.74076
670	-0.71103	0.31353
671	-0.51875	0.04194
672	-0.14948	0.42953
673	-0.47295	0.60045
674	-0.40885	0.56995
675	0.03672	0.40822
676	-0.1891	0.59134
677	-0.4729	0.89043
678	-0.61021	0.47236
679	-0.64072	0.42355
680	-0.20431	0.57005
681	-0.53693	0.17029
682	-0.60406	0.26491
683	-0.41789	0.68912
684	-0.26224	0.4633
685	-0.41176	0.29853
686	-0.32935	0.33516
687	-0.41784	0.09714
688	-0.65281	0.58849
689	-0.54599	0.11549
690	0.01555	0.61905
691	-0.15534	0.68315
692	-0.81145	0.16437
693	-0.84196	0.03011
694	-0.28347	0.44516
695	-0.37501	0.17968
696	0.00952	0.77784
697	-0.86632	-0.2689
698	-0.47873	0.03935
699	-0.6191	0.94268
700	-0.67707	0.11262
701	-0.18878	0.3995
702	-0.08806	0.4453
703	-0.56412	0.65283
704	0.09507	0.22255
705	-0.47559	0.26224
706	-0.55187	0.48504
707	-0.51524	0.5583
708	-0.18564	0.33859
709	0.04326	0.19212
710	-0.38397	0.16772
711	-0.21306	-0.34191
712	-0.57621	0.42105
713	-0.28933	-0.00618
714	-0.73182	0.57062
715	-0.93933	0.63167
716	-0.25572	0.50657
717	-0.35337	0.6134
718	0.04337	0.54933
719	-3.15791	0.28689
720	-0.38385	0.25334
721	-0.23125	0.40289
722	0.15939	0.26253
723	0.17161	0.64401
724	-0.19764	0.53417
725	0.016	0.23816
726	-0.42955	0.36025
727	-0.46005	0.44877
728	-0.54854	0.50372
729	-1.31147	0.51289
730	-1.25957	0.69296
731	-0.16398	0.85472
732	-0.24026	0.53125
733	-1.19545	0.88222
734	-0.24939	0.58316
735	-0.04491	0.31463
736	-0.12424	0.48859
737	-0.15475	0.61068
738	-0.56367	0.06748
739	-0.08758	0.42761
740	-0.47819	0.00953
741	-0.21268	0.37271
742	-0.22792	0.86406
743	-0.115	0.8183
744	-0.2279	0.47347
745	-0.46898	0.28428
746	-0.14548	0.36669
747	-0.07222	0.23853
748	-0.24311	0.501
749	-0.54217	0.57426
750	-0.37431	0.54071
751	-0.93887	0.01887
752	-1.36	0.65976
753	-7.63135	0.38512
754	-7.87853	0.2417
755	-7.08201	0.16237
756	-7.05453	0.6171
757	-6.95991	0.5927
758	-7.42071	0.47065
759	-7.30779	0.36691
760	-6.55704	0.70262
761	-4.11562	0.52868
762	-7.7533	0.58058
763	-6.76757	0.38834
764	-7.5244	0.75762
765	-7.31686	0.71796
766	-7.68001	0.45247
767	-7.23139	0.23582
768	-4.31084	0.24499
769	-0.43205	0.33656
770	-0.27334	0.41287
771	-0.14821	0.47087
772	0.09289	0.60211
773	-0.63951	0.53499
774	-0.31296	0.19931
775	-0.43197	0.11693
776	-0.51741	0.09864
777	-0.41363	0.37331
778	-0.40446	0.29093
779	-2.36368	0.60833
780	-0.35561	0.40083
781	0.00756	0.28488
782	-0.23657	0.14452
783	-0.34642	-0.05688
784	-0.32199	0.43447
785	-0.3647	0.05607
786	-1.64032	0.24224
787	0.15412	0.70918
788	-0.12663	0.21786
789	-0.15408	0.80381
790	-0.42262	0.03174
791	-0.8468	0.08668
792	-0.20592	0.09586
793	-0.22422	0.61772
794	-0.37374	0.41632
795	-0.2425	0.79171
796	-0.24859	0.06846
797	-0.05327	0.54455
798	-0.48661	0.71546
799	-0.08681	0.36148
800	-0.53846	0.78569
801	-0.16918	0.55987
802	-0.46519	0.35542
803	-0.27902	0.44394
804	-0.28817	0.31884
805	-0.09284	0.42566
806	-0.3095	0.55996
807	-0.26676	0.52641
808	-0.31253	0.70037
809	-0.40712	-0.47759
810	-0.76721	0.3464
811	-0.47118	0.54173
812	-0.43455	0.48377
813	-0.16903	0.7798
814	-0.26057	0.87748
815	-0.18121	0.05352
816	-0.47112	0.21833
817	-0.34293	0.72799
818	-0.26967	0.68528
819	-0.02247	0.8562
820	-0.23608	0.59071
821	-0.26964	0.42898
822	-0.48935	0.18486
823	-0.73348	0.40155
824	-0.48627	0.61824
825	-0.27264	0.04148
826	-0.16581	0.62743
827	-0.14444	0.24903
828	-0.32753	0.45352
829	-0.14746	0.20634
830	0.00514	0.16058
831	-0.09251	0.56038
832	-0.25118	0.39255
833	-0.73335	0.55126
834	-0.34576	0.91443
835	-0.37322	0.42922
836	-0.06192	0.47196
837	-0.68447	0.63372
838	-0.47694	0.83821
839	0.07544	0.33163
840	-0.09544	0.37132
841	-0.13205	0.40796
842	-0.24495	0.16689
843	-0.51349	0.35306
844	-0.83697	0.5606
845	-0.26628	0.48127
846	-0.77286	0.45992
847	-0.3456	0.93601
848	-0.63855	0.74377
849	-0.09228	0.71632
850	-0.38523	0.13345
851	-0.4371	0.55156
852	-0.24788	0.52411
853	-0.06171	0.15792
854	-0.36077	0.60654
855	-0.0983	0.82628
856	-0.31802	0.3838
857	-0.58961	0.28921
858	-0.61401	0.35331
859	-0.59264	0.35638
860	-0.22031	-0.11968
861	-0.08907	0.27096
862	-0.20502	0.17333
863	-0.08599	0.52124
864	0.09407	0.43581
865	-0.4827	0.7288
866	-0.31178	0.64336
867	-0.22632	0.47248
868	-0.33922	0.24667
869	-0.05845	0.7899
870	-0.49789	0.50305
871	-0.34529	0.37184
872	-0.46124	0.42069
873	-0.12249	0.5031
874	-0.27506	0.49701
875	-0.12856	0.66183
876	-0.53138	-0.02786
877	-0.18347	0.59777
878	-0.20177	0.27735
879	-0.18344	0.34451
880	-0.25973	-0.07967
881	0.01495	0.7901
882	-0.71746	-0.06132
883	-0.61064	0.09128
884	-0.25967	0.65282
885	-0.29628	0.12488
886	0.03332	0.52773
887	-0.21996	0.39347
888	-0.16197	0.04254
889	-0.07956	0.54609
890	-0.50069	0.47897
891	-0.67767	0.28368
892	-0.29619	0.44544
893	-0.35111	0.62856
894	-0.73257	0.75065
895	-0.0337	-0.03669
896	-0.43652	0.25629
897	-0.05199	0.74459
898	-0.05503	0.47911
899	-0.53719	0.67138
900	-0.21369	0.30519
901	-0.40289	-0.16476
902	-0.56462	0.46697
903	0.01523	-0.09149
904	-0.30825	0.42733
905	-0.6012	0.46702
906	-0.83007	0.33886
907	0.00612	0.4701
908	0.06412	0.53726
909	-0.47298	0.45182
910	-0.25629	0.5556
911	-0.98565	0.32063
912	-0.27152	-0.39651
913	-0.15554	0.61058
914	-0.46376	0.33899
915	-0.36304	0.11623
916	-0.29588	0.61979
917	-0.17075	0.09795
918	0.04899	0.73884
919	-0.04255	0.30551
920	-0.21954	0.27196
921	-0.43925	0.38794
922	-0.26224	0.45815
923	-0.01503	0.16519
924	-0.44227	-0.10334
925	-0.01806	0.30866
926	0.1498	0.22933
927	-0.00583	-0.00564
928	0.03691	-0.1521
929	0.13763	-0.39318
930	-0.13701	0.18667
931	-0.77177	0.50713
932	-0.15835	0.25385
933	-0.33229	0.33931
934	-0.17969	0.69639
935	0.00648	0.33019
936	-0.49094	-1.4215
937	-0.35665	0.59268
938	-0.10945	-0.06649
939	-0.45733	-0.41742
940	-0.34746	-0.1519
941	-0.0087	0.49204
942	-0.44509	0.01598
943	-0.53663	-0.29834
944	-0.42065	0.25405
945	-0.15818	-0.26779
946	-0.18564	0.23577
947	-0.27107	0.45551
948	-0.63727	0.45858
949	-0.65252	-0.02663
950	0.00973	0.07715
951	-0.24661	0.39149
952	-0.37477	0.60208
953	-0.448	0.39153
954	0.18983	-0.18219
955	-0.31675	-0.10587
956	-0.28927	0.54722
957	-0.22212	0.44653
958	0.27228	0.40992
959	-0.09392	0.18716
960	-0.07559	-0.36824
961	-0.05422	0.4588
962	0.08617	0.69686
963	0.02515	0.06516
964	0.02517	0.17504
965	-0.47226	0.44361
966	-0.35933	-0.10874
967	-0.38678	0.08048
968	-0.31658	-0.85334
969	0.12594	0.22395
970	0.19309	-0.23685
971	-0.62172	0.55663
972	-0.38672	-0.30395
973	-0.09374	0.26369
974	-0.20969	0.40714
975	0.05277	0.575
976	-0.16389	0.00739
977	-0.53619	0.79171
978	-0.16386	-0.03835
979	0.12912	-0.2489
980	-0.51784	0.48048
981	-0.22181	-0.42587
982	-0.4873	0.32183
983	0.04067	0.14179
984	-0.06003	0.63009
985	-0.67647	-0.13589
986	-0.01423	0.47448
987	-0.20953	-0.09618
988	-0.02641	-0.01682
989	-0.38345	0.41655
990	-0.4048	-0.43488
991	-0.0874	-2.82133
992	-0.39562	-4.22207
993	-0.38645	-6.32472
994	-0.34066	-1.93322
995	-0.35286	-6.10801
996	-0.12091	-5.90963
997	-0.23991	-5.37556
998	-0.19413	-4.97576
999	-0.00796	-3.84049
1000	-0.17579	-5.98891
1001	-0.58776	-5.90649
1002	-0.17271	-6.03465
1003	-0.02927	-5.78744
1004	-0.15132	-5.05805
1005	-0.41071	-4.99395
1006	-0.66705	-5.86979
1007	-0.48698	-5.36013
1008	-0.40152	-5.03052
1009	-0.14516	-5.18614
1010	-0.49915	-4.63986
1011	0.01051	0.23076
1012	-0.38621	-0.46197
1013	-0.20614	0.09957
1014	-0.14509	0.00193
1015	-0.71576	0.10876
1016	-0.45329	0.45057
1017	-0.50821	0.62454
1018	-0.23049	0.42619
1019	-0.45631	0.591
1020	-0.40441	-0.53203
1021	-0.37694	0.11801
1022	-0.14499	0.64293
1023	-0.03511	0.50562
1024	-0.40131	0.62771
1025	-0.47149	0.13334
1026	-0.15104	-0.10773
1027	-0.49588	0.39887
1028	-0.39516	0.08151
1029	-0.54163	0.60948
1030	-0.12353	0.45081
1031	-0.30051	0.56374
1032	-0.48666	0.37454
1033	-0.16011	0.41729
1034	-0.38898	0.72248
1035	-0.47746	0.37765
1036	-0.49271	0.91782
1037	0.04746	0.63098
1038	-0.30042	0.69203
1039	-0.13562	0.69815
1040	-0.49571	0.63408
1041	-0.19663	0.33807
1042	-0.30648	0.36556
1043	-0.1905	0.68601
1044	-0.42852	0.26793
1045	-0.08061	0.52735
1046	-0.60245	0.45413
1047	-0.25758	0.52738
1048	-0.46204	0.60675
1049	-0.37658	0.68001
1050	-0.08054	0.73495
1051	-0.08969	0.53356
1052	-0.19038	0.53357
1053	-0.33075	0.02395
1054	-0.12932	-0.14999
1055	-0.42533	0.42071
1056	-0.19643	-0.21709
1057	-0.02857	0.01791
1058	-0.06518	0.40855
1059	-0.39476	0.51538
1060	-0.19943	0.27736
1061	-0.36422	0.43912
1062	-0.3581	-0.25972
1063	-1.4262	0.74128
1064	-0.26957	0.47884
1065	-0.0834	0.25913
1066	-0.15663	0.17065
1067	-1.58484	0.60707
1068	0.0265	0.94888
1069	-0.0803	0.60405
1070	-0.33053	0.77801
1071	-0.07417	0.31111
1072	-0.05585	0.66819
1073	-0.33355	0.24401
1074	-0.34879	0.18604
1075	-0.51052	0.36001
1076	-0.63868	0.39359
1077	-0.50134	-0.37543
1078	-0.11986	0.13423
1079	-0.46469	0.24106
1080	-0.3243	0.30821
1081	0.12432	0.27771
1082	-0.32427	0.55544
1083	-0.19304	0.46695
1084	-0.20828	0.40594
1085	-0.23573	0.84541
1086	-0.26014	0.33578
1087	-0.50732	0.2534
1088	-0.12889	0.37548
1089	-0.19906	0.44569
1090	-0.44319	0.5098
1091	-0.23871	-0.60103
1092	0.05427	0.12836
1093	-0.6995	0.39083
1094	-0.47976	0.51597
1095	-0.07386	0.31457
1096	-0.06164	0.67164
1097	-0.18981	0.37869
1098	-0.97409	0.46721
1099	-0.82454	-0.11872
1100	0.18255	0.40926
1101	-0.37896	0.46115
1102	-0.54985	0.18956
1103	-0.18668	0.43067
1104	-0.5956	0.76943
1105	-0.23853	0.19572
1106	-0.40942	0.06756
1107	-0.58335	-0.39324
1108	-0.6047	0.45822
1109	-0.69929	-0.16432
1110	-0.20185	0.09204
1111	-0.21709	0.1592
1112	-0.41544	0.32401
1113	-0.08279	0.64446
1114	0.15831	0.14094
1115	-0.52832	0.2264
1116	0.0088	-0.28322
1117	-0.10105	-0.06348
1118	-0.1285	0.21119
1119	-0.41535	-0.03598
1120	-0.31768	0.10136
1121	-0.01555	0.15936
1122	-0.27799	0.13192
1123	-0.13454	0.45542
1124	-0.18946	0.63854
1125	-0.75097	-0.03283
1126	-0.68992	-0.01145
1127	-0.37863	0.11674
1128	-0.3542	0.38226
1129	-0.0246	0.11067
1130	-0.29314	0.25107
1131	-0.48234	0.541
1132	-0.73257	0.55323
1133	-0.74782	0.55019
1134	-0.50671	0.27555
1135	-0.43651	0.36407
1136	-0.48227	0.02534
1137	-0.09469	0.63876
1138	-0.23506	0.5045
1139	-0.24115	0.86462
1140	-0.83317	0.24818
1141	-0.0336	0.66019
1142	-0.4944	-0.06001
1143	-0.30213	-0.4201
1144	-0.49133	0.28487
1145	-0.20445	-0.03249
1146	-0.16171	0.43444
1147	-0.34786	0.40699
1148	-0.13117	0.25137
1149	-0.2929	0.1812
1150	-0.30204	-0.2735
1151	0.21372	0.35518
1152	-0.51564	-0.35281
1153	-0.16467	-0.4596
1154	-0.2257	0.15992
1155	-0.03037	-0.08726
1156	-0.39352	-1.07296
1157	0.12224	-0.63349
1158	-0.19513	-0.35271
1159	-0.18596	-0.17569
1160	-0.34159	-0.16347
1161	-0.19204	0.15393
1162	-0.46668	-0.1024
1163	-0.60095	0.34928
1164	-0.27745	0.64226
1165	-0.16757	0.22724
1166	-0.2408	-0.23966
1167	-0.40253	0.0991
1168	-0.25298	0.90783
1169	-0.49101	-0.05345
1170	-0.42385	0.67593
1171	-0.34755	0.20293
1172	0.03393	0.43183
1173	-0.24987	0.29757
1174	-0.53672	0.48069
1175	0.2476	0.30676
1176	-0.60993	0.20912
1177	-0.76251	0.33425
1178	-0.68315	0.33732
1179	-0.5275	-0.08685
1180	-0.33217	-7.54533
1181	-0.35658	-6.57486
1182	-0.3352	-6.96547
1183	-0.68004	-4.46606
1184	-0.33823	-6.10789
1185	-0.48775	-7.02645
1186	-0.28327	-7.85346
1187	-0.0971	-5.69585
1188	-0.16728	1.13095
1189	-0.19778	-1.96657
1190	-0.15504	0.19714
1191	-0.35034	-2.00316
1192	-0.16417	-2.38766
1193	-0.36252	-7.39558
1194	-0.53951	-2.9522
1195	-0.42353	-1.63077
1196	-0.42963	-5.04568
1197	-0.63713	-7.22767
1198	-0.28922	-6.58678
1199	0.06785	-6.76376
1200	-0.52113	-7.12996
1201	-0.08471	-7.00482
1202	-0.2678	-5.87565
1203	-0.12131	-5.5552
1204	-0.49971	-6.85523
1205	-0.39594	-5.6925
1206	-1.22906	-7.01084
1207	-0.21281	-6.19295
1208	-0.36538	-6.58051
1209	-0.48744	-5.78398
1210	-0.06629	-5.09732
1211	-0.36229	-6.6537
1212	-0.28599	-6.7666
1213	-0.80172	-2.47581
1214	-0.06929	-6.7452
1215	-0.47516	-6.43085
1216	-0.36223	-6.45525
1217	-0.44461	-6.76041
1218	0.09556	-6.28737
1219	-0.31336	-6.89771
1220	-0.25842	-3.67198
1221	-0.17296	-6.43686
1222	-0.39877	-7.30049
1223	-0.18514	-6.42462
1224	-0.55439	-7.06547
1225	-0.15154	-6.60159
1226	-0.37431	-7.06544
1227	-0.02334	-6.61681
1228	-0.52992	-6.43979
1229	-0.40479	-4.51412
1230	-0.26745	-4.45611
1231	-0.3895	-4.97795
1232	0.18424	-2.81729
1233	-0.15449	-2.75929
1234	-0.00189	-0.04626
1235	-0.27959	-2.00547
1236	-0.21549	-2.11532
1237	-0.33755	-2.10004
1238	-0.17274	-2.08171
1239	-0.2124	-6.75394
1240	-0.65794	-4.4651
1241	-0.2612	-6.16797
1242	0.18132	-7.33067
1243	-0.39545	-6.51889
1244	-0.34966	-6.72944
1245	-0.16044	-2.82622
1246	-0.67312	-6.13737
1247	-0.28554	-6.6592
1248	-0.27027	-1.99915
1249	-0.90807	-5.81383
1250	-0.79514	-2.24325
1251	-0.27023	-6.83003
1252	-0.36787	-2.22186
1253	-0.39838	-6.28373
1254	-0.23357	-2.09975
1255	-0.45328	-1.78541
1256	-0.46243	-6.49425
1257	-0.22743	-5.89609
1258	-0.07483	-3.98262
1259	-0.09312	-4.39154
1260	-0.28232	-3.73845
1261	-0.22432	-6.6315
1262	-0.15717	-6.78102
1263	-0.22735	-7.20825
1264	-0.22734	-4.68748
1265	-0.59964	-6.39339
1266	-0.5508	-6.84199
1267	-0.45923	-6.726
1268	-0.45312	-4.81558
1269	-0.34629	-6.52455
1270	-0.23031	-7.26916
1271	-0.20894	-6.45128
1272	0.14508	-6.04843
1273	-0.15093	-6.8144
1274	-0.3035	-6.66485
1275	-0.13564	-6.31083
1276	0.06884	-5.90493
1277	-0.18139	-1.07093
1278	0.06581	-0.48802
1279	-0.23935	-0.39951
1280	-0.43465	-0.77791
1281	-0.05927	-0.48797
1282	-0.08673	-0.4849
1283	-0.33391	-0.01187
1284	-0.66043	0.38183
1285	-0.35829	0.77857
1286	-0.19349	-0.3353
1287	-0.32775	-0.03926
1288	-0.15684	0.59857
1289	-0.17819	-4.76945
1290	-0.26973	-6.60355
1291	-0.26056	-6.77748
1292	-0.70916	-7.0216
1293	-0.54435	-7.10093
1294	-0.37954	-6.60653
1295	0.12706	-6.51496
1296	-0.01941	-6.81096
1297	-0.01329	-5.35526
1298	-0.42832	-6.68581
1299	-0.51986	-6.96655
1300	0.19122	-6.32872
1301	-0.44964	-6.44772
1302	-0.01323	-7.01533
1303	0.02341	-6.66131
1304	-0.02236	-6.408
1305	-0.09864	-7.00613
1306	-0.40075	-7.46387
1307	-0.19627	-6.81993
1308	-0.15963	-6.47507
1309	-0.08028	-6.63985
1310	-0.4892	-7.21966
1311	-0.18706	-7.58891
1312	-0.06193	-6.94192
1313	0.08762	-7.03041
1314	-0.16261	-0.5332
1315	-0.20227	-0.03879
1316	-0.61424	0.2603
1317	-0.49826	-0.32563
1318	-0.55623	0.2115
1319	-0.3365	-0.01431
1320	-0.11981	0.12609
1321	-0.40056	-0.87487
1322	-0.03433	-0.00511
1323	-0.27236	0.12003
1324	-0.03126	0.24517
1325	-0.35778	0.19331
1326	-0.47068	-0.38956
1327	-0.49508	0.70299
1328	-0.05257	0.25745
1329	-0.3089	0.24831
1330	-0.14715	0.41617
1331	0.19161	0.55046
1332	0.18857	0.3216
1333	-6.25367	0.31246
1334	-7.26074	0.44065
1335	-7.12645	0.78857
1336	-7.01352	0.21485
1337	-6.40621	0.69095
1338	-7.56282	0.20879
1339	-7.46515	0.82221
1340	-7.69402	0.38887
1341	-7.8588	0.45298
1342	-4.18447	0.66662
1343	-7.28199	0.35535
1344	-7.45287	0.75515
1345	-7.83433	0.10819
1346	-7.44675	-0.2641
1347	-4.61165	-0.22441
1348	-5.74079	0.84982
1349	-5.18841	0.64232
1350	-7.40092	0.8346
1351	-7.0469	0.72475
1352	-7.27272	0.42264
1353	-6.34192	0.21514
1354	-6.80883	0.91706
1355	-6.91868	0.68209
1356	-7.22079	0.67295
1357	-8.08137	0.64856
1358	-7.37945	0.61195
1359	-8.60625	0.3953
1360	-7.59915	0.69133
1361	-7.35195	0.62726
1362	-7.0376	0.87447
1363	-7.28478	0.43809
1364	-7.5045	0.62731
1365	-0.5068	0.47779
1366	-7.89815	0.61209
1367	-7.15351	0.42595
1368	-6.70794	0.24591
1369	-7.33964	0.52974
1370	-6.42105	0.14218
1371	-7.51356	0.45958
1372	-3.03662	-0.15991
1373	-3.87279	-0.14158
1374	-3.07627	-3.70907
1375	-7.26937	-1.3653
1376	-7.22969	-5.13115
1377	-7.43109	-6.1077
1378	-7.2968	-6.22365
1379	-5.1514	-7.05066
1380	-7.02517	-6.27244
1381	-7.39137	-6.19918
1382	-7.47375	-6.13813
1383	-7.53172	-6.83697
1384	-7.45847	-5.88786
1385	-7.07393	-6.42495
1386	-7.10444	-6.5531
1387	-7.97723	-6.32726
1388	-6.95487	-5.89999
1389	-7.74527	-6.58052
1390	-7.36684	-6.98334
1391	-7.50415	-6.91923
1392	-7.67199	-6.48587
1393	-6.86936	-6.30579
1394	-7.44308	-5.81445
1395	-7.52241	-6.09214
1396	-7.01275	-6.30269
1397	-6.18877	-6.46747
1398	-8.05643	-2.50627
1399	-7.21413	-5.83267
1400	-8.11134	-6.43385
1401	-8.08386	-6.71154
1402	-7.19578	-6.91294
1403	-7.61691	-0.6965
1404	-7.68709	0.1397
1405	-7.29035	-2.85405
1406	-7.43682	-5.741
1407	-7.32084	-5.81118
1408	-8.08682	-5.83557
1409	-7.41542	-6.7816
1410	-7.74195	-6.39401
1411	-7.7694	-6.42146
1412	-7.98301	-6.15289
1413	-8.37972	-6.79984
1414	-0.26204	-6.61672
1415	-0.49701	-6.72352
1416	-0.13384	-0.39415
1417	-0.28031	-7.19651
1418	-0.59768	-5.78047
1419	-0.6587	-6.58307
1420	-0.44201	-6.39995
1421	-0.21312	-6.28396
1422	-0.07272	-6.25038
1423	-0.36568	-6.40295
1424	-0.26496	-4.30942
1425	-0.54571	-4.40401
1426	0.0494	-7.27265
1427	-0.30154	-5.68267
1428	-0.32289	-7.23294
1429	0.17456	-6.60731
1430	0.07691	-6.76294
1431	-0.17637	-5.49644
1432	-0.58529	-7.1108
1433	-0.39607	-6.02131
1434	-0.58527	-6.35393
1435	-0.24346	-6.18607
1436	-0.36246	-4.34584
1437	-0.21291	-6.23792
1438	0.000722885	-5.96324
1439	-0.12744	-6.06393
1440	-0.06334	-6.6346
1441	0.1503	-6.78717
1442	-0.24947	-7.14726
1443	-0.45087	-6.90615
1444	-0.38372	-6.09742
1445	-0.07243	-3.45458
1446	-0.55765	-5.99973
1447	-0.48439	-6.86031
1448	-0.28296	-2.2674
1449	0.00392	-3.75358
1450	-0.36533	-0.21963
1451	-0.49349	-0.14637
1452	-1.77827	0.36024
1453	-0.41107	0.12527
1454	-1.00615	0.2443
1455	-0.34391	0.90045
1456	-0.09365	0.51594
1457	-0.11195	-0.2897
1458	-0.34082	0.66856
1459	0.14442	0.51599
1460	-0.38657	0.50075
1461	-0.53609	-3.46347
1462	0.10174	-2.38923
1463	-0.28887	-4.49493
1464	0.00411	-4.96183
1465	-0.3804	-6.60061
1466	-0.00197	-6.02076
1467	-0.31324	-5.82848
1468	-0.30102	-6.29538
1469	-0.2064	-6.6158
1470	-0.09042	-7.09796
1471	-0.62141	-1.54374
1472	-0.36505	-6.68289
1473	-0.28569	-5.99928
1474	-0.30399	-6.25866
1475	-0.12087	0.47354
1476	-0.47792	-6.50277
1477	-0.74951	-6.59125
1478	-0.5847	-6.49358
1479	-0.3436	-6.44778
1480	-0.38326	-5.89235
1481	-0.27033	-6.9696
1482	-0.0567	-6.5576
1483	-0.31303	-6.72543
1484	-0.44424	-6.24323
1485	-0.30385	-6.64299
1486	-0.28553	-7.04276
1487	-0.63341	-5.04079
1488	-0.33433	-6.48425
1489	-0.38009	-6.53612
1490	0.02886	-7.02133
1491	-0.26715	-6.86262
1492	-0.29155	-8.69366
1493	-0.47159	-6.65507
1494	-0.5845	-6.62758
1495	-0.19081	-6.6764
1496	-0.026	-6.30712
1497	-0.27623	-7.86655
1498	0.06253	-6.53291
1499	-0.78585	-7.01507
1500	-0.5417	-6.80449
1501	0.2121	-5.58987
1502	-0.55388	-5.99574
1503	0.30063	-6.42907
1504	-0.17543	-6.2551
1505	-0.13575	-6.32833
1506	-0.45617	-7.19196
1507	-1.97593	-6.22148
1508	-1.05734	-6.60904
1509	-0.81929	-6.45033
1510	-0.0838	-5.98034
1511	-0.11126	-6.49302
1512	-0.38895	-6.62423
1513	-0.2272	-6.02912
1514	-0.31263	-6.4533
1515	-0.44385	-6.11454
1516	0.05665	-5.32411
1517	-0.62998	-2.82776
1518	0.07194	-6.48985
1519	-0.03791	-3.23056
1520	-0.08062	-3.4167
1521	-0.39494	0.54755
1522	-7.27054	-4.80216
1523	-0.75197	-5.23244
1524	-0.53834	-6.3158
1525	0.00184	-4.45726
1526	-0.18736	-6.0167
1527	-0.1141	-6.30049
1528	-0.33382	-5.91595
1529	-0.11103	-6.69414
1530	-0.75188	-6.42556
1531	0.01717	-6.42555
1532	-0.36428	-6.07153
1533	-0.06825	-6.41026
1534	-0.53821	-6.17525
1535	-0.36424	-6.58722
1536	-0.50766	-6.6635
1537	-0.47408	-6.53226
1538	0.03863	-6.69704
1539	-0.35809	-6.44983
1540	-0.41301	-6.63597
1541	-1.2797	-6.01034
1542	-0.41909	-1.8935
1543	-0.38245	-6.66949
1544	-0.37634	-6.70914
1545	-0.11998	-5.53115
1546	-0.34274	-5.96143
1547	-0.30611	-1.73473
1548	-0.20233	-5.54025
1549	-0.49224	-6.35811
1550	-0.24198	-5.72943
1551	-0.19924	-3.9838
1552	-0.29078	-4.28591
1553	-0.45557	-5.06409
1554	-0.05577	-4.54528
1555	-0.06186	-4.03562
1556	-0.52572	-6.68148
1557	-0.51045	-7.13007
1558	-0.08014	-6.72111
1559	-0.12285	-6.58377
1560	-0.30289	-6.30909
1561	-0.18996	-7.00183
1562	-0.05872	-7.21848
1563	0.09998	-6.91939
1564	-0.54393	-7.81049
1565	-0.3425	-5.96111
1566	-0.09529	-6.65079
1567	-0.54389	-6.88881
1568	-0.05559	-5.66504
1569	-0.22343	-7.31297
1570	-0.15322	-6.59884
1571	-0.45228	-6.44624
1572	0.08789	-6.07391
1573	-0.02501	-5.97623
1574	-0.29966	-5.61916
1575	-0.29659	-6.14405
1576	0.15813	-6.72386
1577	-0.36065	-6.23251
1578	-0.32707	-6.27217
1579	-0.39115	-3.69455
1580	-0.43386	-3.55416
1581	-0.07679	-4.56886
1582	0.28333	-5.29212
1583	-0.50401	-6.22137
1584	-0.73898	-6.31444
1585	-0.44295	-5.80937
1586	-0.41547	-5.99399
1587	-0.1408	-5.93905
1588	-0.22929	-6.23964
1589	-0.12857	-6.00617
1590	0.08812	-6.23505
1591	-0.5741	-6.07787
1592	-0.46117	-5.90391
1593	-0.16209	-5.91154
1594	-0.00338	-6.3815
1595	-0.22004	-6.06411
1596	-0.0766	-6.46235
1597	-0.32988	-6.22583
1598	-0.07962	-3.65014
1599	-0.48244	-5.20981
1600	-0.33595	-4.87104
1601	-1.1538	-5.09075
1602	-0.45189	-4.67265
1603	-0.29013	-4.11416
1604	-0.4244	-5.87501
1605	-0.21991	-5.92076
1606	-0.06121	-5.49961
1607	-0.03068	-4.91975
1608	-0.12832	-2.27386
1609	-0.000136852	-0.60759
1610	-0.68067	-0.43057
1611	0.12196	-0.41834
1612	-0.61961	-0.0216
1613	-0.56161	0.13101
1614	-0.52803	0.53996
1615	-0.15875	-1.37348
1616	-0.66533	-5.42314
1617	-0.2808	-7.1138
1618	-1.22072	-6.42409
1619	-2.20643	-5.1759
1620	-3.50647	-7.10765
1621	-0.14036	-6.65902
1622	-0.33566	-4.52583
1623	-0.10372	-6.14324
1624	0.43646	-6.01505
1625	-0.19219	-6.66506
1626	0.00924	-7.44324
1627	-0.21353	-6.20726
1628	-0.39662	-4.80649
1629	0.052	-4.00081
1630	0.06117	-3.37518
1631	-0.02427	-5.97831
1632	-0.10971	-6.69851
1633	-0.26533	-6.30176
1634	-0.26227	-2.20018
1635	-1.07402	-6.22849
1636	-0.366	-6.22542
1637	0.01853	-7.41254
1638	-0.22254	-6.86626
1639	-0.44226	-6.54886
1640	-0.01195	-2.50831
1641	-0.33542	-2.22143
1642	-0.35372	-1.04343
1643	-0.82673	-6.63424
1644	-0.16143	-6.28022
1645	-0.59477	-4.94048
1646	-0.37198	-6.6586
1647	-0.6039	-6.08791
1648	-0.15223	-3.19177
1649	-0.59777	-6.55479
1650	-0.4055	-5.59957
1651	-0.25289	-5.85591
1652	-0.23762	-7.22918
1653	-0.20709	-6.71647
1654	-0.34746	-6.0176
1655	-0.22233	-4.33301
1656	-0.49697	-6.38378
1657	-0.46034	-6.39597
1658	-0.48779	-7.29622
1659	-0.31078	-6.71637
1660	-0.22531	-6.79264
1661	-0.3901	-6.20974
1662	0.02496	-6.29823
1663	-0.89971	-6.11205
1664	-0.31987	-6.18833
1665	-0.41141	-6.24324
1666	-0.2466	-6.27069
1667	-0.09095	-6.56975
1668	-0.20995	-6.72537
1669	-0.31675	-6.74672
1670	-0.4327	-1.76318
1671	0.01287	0.35476
1672	-0.28619	0.3914
1673	-0.27397	-6.18818
1674	-0.42045	-6.7741
1675	-0.21597	-6.77408
1676	-0.49061	-6.17287
1677	-0.13965	-6.20337
1678	-0.27391	-7.31419
1679	-0.3624	-6.44748
1680	-0.21285	-6.06904
1681	-0.31965	-6.73126
1682	-0.1762	-3.47807
1683	-0.28605	-6.1636
1684	-0.03885	-6.93262
1685	-0.01442	-6.13915
1686	-0.49048	-6.61521
1687	-0.16698	-6.26424
1688	0.01919	-6.09027
1689	0.1962	-6.96611
1690	-0.55757	-6.48086
1691	-0.23407	-5.92542
1692	-0.35003	-6.63342
1693	-0.03873	-6.374
1694	-1.00308	-6.45333
1695	-0.36219	-5.96198
1696	-0.5697	-6.56621
1697	-0.31334	-6.37698
1698	-0.06003	-7.86012
1699	-1.03963	-6.63635
1700	-0.45979	-6.77366
1701	-0.13934	-6.49899
1702	-1.80253	-6.24567
1703	-0.57877	-6.19073
1704	-2.76076	-6.6027
1705	-1.51258	-6.34938
1706	-0.11486	-1.68628
1707	-0.82591	-6.24559
1708	-0.91745	-6.24252
1709	-3.2032	-6.24556
1710	-2.12592	-6.04107
1711	-6.05657	-5.684
1712	-5.54996	-5.82436
1713	-2.04043	-6.31873
1714	-3.71278	-6.84057
1715	-0.75561	-4.23129
1716	-0.85936	-5.98909
1717	-0.31003	-6.60858
1718	-0.16964	-6.68486
1719	0.20574	-6.78555
1720	-0.09942	-6.32472
1721	-0.7708	-5.83032
1722	0.02573	-6.89231
1723	-0.20314	-6.2087
1724	0.08984	-4.50275
1725	-2.92834	-4.66142
1726	-3.2335	-4.40506
1727	-2.8215	-7.05092
1728	-2.321	-7.11194
1729	0.06549	-6.38865
1730	-0.59063	-6.37948
1731	-0.5662	-6.67243
1732	-0.41665	-6.27569
1733	-0.36476	-6.96232
1734	-0.62415	-5.80568
1735	-2.89769	-6.651
1736	-0.24265	-6.45262
1737	-1.62203	-6.47397
1738	-2.13166	-6.99275
1739	-2.34527	-6.60516
1740	-2.38798	-6.02531
1741	-1.96073	-6.69363
1742	-2.3788	-5.8971
1743	-0.54774	-6.01916
1744	-0.21813	-5.80246
1745	-0.59043	-6.54708
1746	-2.79989	-6.41278
1747	-2.76936	-6.27238
1748	-2.14679	-6.31509
1749	0.13288	-6.51954
1750	-0.5507	-6.34252
1751	-0.50491	-7.58457
1752	-1.23732	-6.72091
1753	-3.00732	-6.36689
1754	-3.88011	-6.69646
1755	-3.0073	-5.70157
1756	-2.19247	-6.5591
1757	-3.36128	-5.91516
1758	-3.99908	-6.87034
1759	-0.63298	-6.58957
1760	-0.23013	-6.42475
1761	-0.38881	-5.67706
1762	-0.25452	-6.60783
1763	-0.41625	-2.01491
1764	-0.38572	-5.54883
1765	0.02628	-6.72069
1766	-0.22701	-6.18662
1767	0.14227	-6.46126
1768	-0.63897	-6.33001
1769	-0.39787	-7.48967
1770	0.18198	-6.81216
1771	0.00194	-6.57716
1772	-0.42224	-6.69311
1773	-0.3795	-6.67173
1774	-0.29099	-6.52523
1775	-0.33675	-6.11017
1776	-0.46797	-2.70744
1777	-0.51068	-7.14163
1778	-0.3947	-5.83851
1779	-0.10172	-4.8894
1780	0.32554	-6.29319
1781	-0.26038	-6.48544
1782	-0.04675	-6.28095
1783	-0.43126	-6.32976
1784	-0.12607	-7.85257
1785	-0.12605	-5.42641
1786	-0.11078	-6.50977
1787	0.15168	-4.23009
1788	-0.31217	0.13394
1789	-0.0314	0.62224
1790	-0.38844	-0.10406
1791	-0.29077	0.44527
1792	0.18837	1.00071
1793	-0.44028	0.25305
1794	-0.32125	-0.30236
1795	-0.21748	0.11575
1796	0.44477	-0.03987
1797	-0.66301	-0.00934
1798	-0.48905	-1.98686
1799	-0.38527	-2.73452
1800	-0.50733	-6.74452
1801	-0.30285	-0.61657
1802	-0.61412	-0.7783
1803	-0.58969	0.37834
1804	-0.54695	0.56146
1805	-0.48896	-0.4334
1806	-0.23565	0.49741
1807	-0.36686	0.26549
1808	-0.32412	0.42115
1809	0.12145	0.00918
1810	-0.73609	0.24418
1811	-0.60485	0.58294
1812	-0.64451	0.1374
1813	-0.51937	0.14352
1814	-0.15315	0.32969
1815	-0.37897	0.000120878
1816	-0.40947	0.40297
1817	-0.05545	0.04898
1818	-0.29958	0.30535
1819	-0.78175	0.40607
1820	0.03309	0.5129
1821	-1.37987	0.70518
1822	-1.15402	0.1925
1823	-1.11129	0.37257
1824	-1.12348	-0.04245
1825	-0.5711	0.34209
1826	-1.1143	0.18341
1827	-0.0065	-0.2194
1828	-0.43373	0.51303
1829	-0.46729	-0.15528
1830	-0.38793	0.22315
1831	-0.12852	0.77554
1832	-0.48251	0.20487
1833	-0.60762	0.388
1834	-0.28412	0.39412
1835	0.05769	0.14084
1836	-0.31461	-0.1338
1837	-0.0552	0.43384
1838	-0.46107	-0.54271
1839	-0.14367	0.24161
1840	-0.34508	0.10735
1841	-0.35422	0.26606
1842	-0.58919	0.01888
1843	-0.58308	0.52244
1844	-0.18328	0.26916
1845	-0.4152	0.75746
1846	-0.21683	0.20206
1847	-0.27785	0.3394
1848	-0.62879	0.59272
1849	0.09449	0.56222
1850	0.06399	-0.24954
1851	-0.54025	0.47985
1852	-0.58296	0.13197
1853	-0.31744	0.36087
1854	-0.34185	0.40971
1855	-0.49137	0.43719
1856	-0.3113	0.00691
1857	-0.28077	0.26633
1858	-0.45776	0.47997
1859	-0.5493	-0.17614
1860	-0.63169	0.59597
1861	-0.28682	-0.25851
1862	-0.25935	0.4251
1863	-0.22576	0.20539
1864	-0.17082	0.49533
1865	-0.44546	0.55028
1866	-0.22572	-0.18823
1867	-0.33252	0.15358
1868	-0.18297	-0.17599
1869	-0.60716	0.3001
1870	-0.04867	-0.01116
1871	-0.25313	0.42526
1872	-0.35687	0.17808
1873	-0.45452	-0.31324
1874	-0.45145	-0.51769
1875	-0.21951	-0.50241
1876	-0.43922	-0.39863
1877	-0.49109	0.26056
1878	-0.02415	0.04696
1879	-0.1279	0.34299
1880	-0.61007	0.37658
1881	-0.253	0.25758
1882	-0.39947	0.40408
1883	-0.58867	0.47734
1884	-0.30179	0.55365
1885	0.04307	0.09895
1886	-0.19495	0.56894
1887	-0.27428	0.3889
1888	-0.17356	0.55677
1889	-0.2651	-0.34959
1890	-0.12776	-0.26412
1891	-0.2132	0.73687
1892	-0.24981	0.56294
1893	-0.39017	0.21505
1894	-0.34133	0.41344
1895	0.14086	0.59656
1896	-0.54577	0.19069
1897	-0.62816	0.14493
1898	-0.2009	0.42266
1899	-0.15206	-0.19683
1900	-0.30158	0.68514
1901	-0.20697	0.45323
1902	-0.25273	0.22436
1903	-0.10928	0.47767
1904	-0.31984	0.08096
1905	-0.23133	-0.09602
1906	0.04029	0.37091
1907	-0.18858	0.28243
1908	-0.08481	-0.63003
1909	-0.71345	-1.01148
1910	-1.57099	-0.35229
1911	-0.28008	-0.89854
1912	-0.22208	-0.09285
1913	-0.5364	0.47174
1914	-0.33192	0.21846
1915	-1.23218	0.41684
1916	-0.42955	-0.06837
1917	-0.34409	-0.16906
1918	-0.20064	-0.01341
1919	-0.50886	0.06901
1920	-0.37152	-0.42536
1921	-0.00834	0.63667
1922	-0.52408	-0.52604
1923	-0.47829	-0.30019
1924	-0.26771	0.21557
1925	-0.03271	0.29799
1926	0.02224	0.34378
1927	-0.61862	0.3499
1928	-0.07234	0.47809
1929	-0.02655	0.1943
1930	-0.58196	0.38047
1931	-0.16691	0.44152
1932	-0.42019	0.31642
1933	-0.2859	0.16995
1934	-0.2981	0.71013
1935	-0.03563	0.41107
1936	-0.52085	0.31343
1937	-0.2828	0.32566
1938	-0.22785	0.05101
1939	-0.12408	0.57288
1940	-0.2736	0.37148
1941	-0.6276	0.46305
1942	-0.18813	0.18536
1943	-0.22474	0.49971
1944	-0.05688	0.05417
1945	-0.1179	0.1732
1946	-0.21249	0.14575
1947	-0.39253	0.25869
1948	-0.30402	0.22513
1949	-0.127	0.51812
1950	-3.32829	0.58222
1951	-8.58645	-0.10135
1952	-7.23146	0.11534
1953	-2.73315	0.32898
1954	-0.50536	0.19472
1955	-0.05979	-0.00668
1956	-0.15743	-0.0677
1957	-0.23982	0.1673
1958	-0.46563	0.44503
1959	-0.38322	0.20396
1960	-0.54495	0.51525
1961	-0.27333	0.60682
1962	-0.26722	0.51529
1963	-0.18176	0.57023
1964	-0.74022	0.71673
1965	-0.4686	0.66792
1966	-1.40547	0.56723
1967	-0.38312	0.52452
1968	0.11128	0.32007
1969	-0.45634	0.60696
1970	-0.2427	0.40556
1971	-0.33424	0.39947
1972	-0.36475	0.4178
1973	-0.26097	0.33542
1974	-0.21519	0.18895
1975	-0.60275	0.1676
1976	-0.46235	0.70778
1977	-0.4013	0.63761
1978	0.01985	0.76885
1979	-0.19681	0.84211
1980	-0.07168	0.1982
1981	-0.21815	0.37522
1982	-0.39819	0.79028
1983	-0.43174	0.68348
1984	-0.26083	0.09146
1985	-0.3951	0.57976
1986	-0.48359	0.2746
1987	-0.50494	0.61946
1988	-0.23332	0.61033
1989	-0.24246	0.73547
1990	-0.03187	0.40284
1991	0.01086	0.61343
1992	-0.05016	0.73246
1993	-0.61777	0.66229
1994	-0.23019	0.6501
1995	0.12383	0.1893
1996	-0.16913	0.40599
1997	-0.44682	0.44568
1998	-0.33695	0.33889
1999	-0.31862	0.44572
[truncated: 20,456 more rows]

## Sheet: Panel_BCD_trace
oocyte slack 2019_09_27_0031b															Slack+SCYL (scyl 2019_09_25_0067b)
open time						closed time=<30ms						closed time>30ms			open time						closed time=<30ms						closed time>30ms
log10 (duration[ms])	histgram	t1	t2	total		log10 (duration[ms])	histgram	t1	t2	total	log10 (duration[ms])	histogram	fitting curve		log10 (duration[ms])	histgram	t1	t2	total		log10 (duration[ms])	histgram	t1	t2	total	log10 (duration[ms])	histogram	fitting curve
-1.30103	0.02931	0.01649	0.01107	0.02756		-1.30103	0.05193	0.01871	0.03406	0.05277	1.6	0.01555	0.01509		-1.30103	0	0.00102	0.00555	0.00657		-1.30103	0.06069	0.05268	0.0025	0.05519	1.6	0.01633	0.0143
-1.22791	0.03319	0.01893	0.01274	0.03166		-1.22791	0.05955	0.02278	0.03814	0.06092	1.8	0.01826	0.01876		-1.23573	0	0.00137	0.00626	0.00763		-1.23573	0.0692	0.06062	0.00306	0.06368	1.8	0.0183	0.0168
-1.15479	0.03611	0.02166	0.01465	0.03631		-1.15479	0.06648	0.02766	0.04265	0.07031	2	0.02255	0.02194		-1.17044	0	0.00184	0.00706	0.0089		-1.17044	0.07769	0.06953	0.00373	0.07326	2	0.01862	0.01783
-1.08166	0.03928	0.02471	0.01684	0.04155		-1.08166	0.07446	0.03346	0.04762	0.08108	2.2	0.02381	0.02408		-1.10514	0	0.00247	0.00796	0.01043		-1.10514	0.08745	0.07942	0.00456	0.08398	2.2	0.01477	0.01707
-1.00854	0.04273	0.02808	0.01935	0.04743		-1.00854	0.08366	0.04028	0.05308	0.09336	2.4	0.02381	0.02479		-1.03985	0	0.00331	0.00897	0.01228		-1.03985	0.09872	0.09031	0.00556	0.09587	2.4	0.01246	0.01475
-0.93542	0.04601	0.03178	0.02222	0.054		-0.93542	0.09663	0.0482	0.05906	0.10726	2.6	0.02467	0.02394		-0.97455	0	0.00443	0.01011	0.01454		-0.97455	0.1108	0.10212	0.00678	0.10891	2.6	0.01246	0.01158
-0.8623	0.0586	0.03578	0.0255	0.06128		-0.8623	0.11547	0.05726	0.06558	0.12284	2.8	0.0231	0.02169		-0.90926	0	0.00592	0.01139	0.01731		-0.90926	0.11494	0.11475	0.00827	0.12302	2.8	0.00895	0.00835
-0.78918	0.06325	0.04005	0.02924	0.06929		-0.78918	0.13799	0.06741	0.07265	0.14006	3	0.01684	0.01845		-0.84396	0	0.0079	0.01283	0.02073		-0.84396	0.11509	0.12798	0.01007	0.13806	3	0.00714	0.00567
-0.71606	0.07287	0.04452	0.0335	0.07802		-0.71606	0.16591	0.07848	0.08026	0.15875	3.2	0.01354	0.01476		-0.77867	0	0.01051	0.01445	0.02496		-0.77867	0.12652	0.14149	0.01226	0.15375	3.2	0.00467	0.00378
-0.64293	0.0951	0.0491	0.03833	0.08742		-0.64293	0.19249	0.09013	0.08841	0.17854	3.4	0.01118	0.01115		-0.71337	0	0.01393	0.01626	0.03019		-0.71337	0.1772	0.15482	0.01491	0.16972	3.4	0.00311	0.00263
-0.56981	0.11124	0.05364	0.0438	0.09744		-0.56981	0.20579	0.10177	0.09704	0.19881	3.6	0.01118	0.00805		-0.64807	0	0.01836	0.0183	0.03666		-0.64807	0.21224	0.16736	0.0181	0.18546	3.6	0.0022	0.00202
-0.49669	0.12089	0.05797	0.04998	0.10795		-0.49669	0.20797	0.11254	0.10611	0.21865	3.8	0.005	0.0057		-0.58278	0.01347	0.02404	0.02058	0.04462		-0.58278	0.20043	0.17838	0.02195	0.20032	3.8	--	0.00156
-0.42357	0.12655	0.06186	0.05693	0.1188		-0.42357	0.24012	0.12128	0.11552	0.2368	4	0.00289	0.00417		-0.51748	0.06203	0.03117	0.02314	0.05431		-0.51748	0.22332	0.18698	0.02655	0.21353	4	--	0.000741348
-0.35045	0.14095	0.06505	0.06473	0.12978		-0.35045	0.2652	0.12662	0.12514	0.25176	4.2	0.00408	0.00336		-0.45219	0.05536	0.0399	0.02599	0.0659		-0.45219	0.24273	0.19221	0.03205	0.22427	4.2	--	0.000393317
-0.27732	0.1513	0.06722	0.07344	0.14066		-0.27732	0.27281	0.12712	0.13481	0.26193	4.4	0.00289	0.00303		-0.38689	0.07978	0.05021	0.02918	0.0794		-0.38689	0.22396	0.19312	0.03858	0.2317	4.4	0.00156	0.000196395
-0.2042	0.15034	0.06809	0.08309	0.15118		-0.2042	0.26433	0.1216	0.14431	0.26591					-0.3216	0.09891	0.06175	0.03274	0.09449		-0.3216	0.22884	0.1889	0.04627	0.23518
-0.13108	0.15289	0.06736	0.09374	0.1611		-0.13108	0.23973	0.10961	0.15338	0.26299					-0.2563	0.10782	0.07361	0.03671	0.11032		-0.2563	0.23153	0.17906	0.05526	0.23432
-0.05796	0.17241	0.06485	0.10539	0.17024		-0.05796	0.23474	0.09182	0.16171	0.25353					-0.19101	0.07547	0.08417	0.04111	0.12529		-0.19101	0.21336	0.16358	0.06565	0.22923
0.01516	0.17548	0.06047	0.11801	0.17849		0.01516	0.24459	0.07029	0.16894	0.23923					-0.12571	0.13015	0.09102	0.046	0.13702		-0.12571	0.20008	0.14312	0.07748	0.2206
0.08829	0.18663	0.05434	0.13155	0.18588		0.08829	0.23919	0.04816	0.17468	0.22284					-0.06042	0.1518	0.09132	0.05141	0.14272		-0.06042	0.21597	0.11904	0.09073	0.20977
0.16141	0.20176	0.04675	0.14586	0.19262		0.16141	0.21354	0.02879	0.17852	0.20731					0.00488	0.14153	0.08286	0.05737	0.14023		0.00488	0.20937	0.09331	0.10522	0.19853
0.23453	0.2095	0.03825	0.16075	0.199		0.23453	0.2056	0.01456	0.18006	0.19461					0.07018	0.14023	0.06574	0.06393	0.12967		0.07018	0.1731	0.06823	0.1206	0.18883
0.30765	0.20166	0.02951	0.17592	0.20543		0.30765	0.18745	0.006	0.17891	0.18491					0.13547	0.13253	0.04359	0.07113	0.11472		0.13547	0.16398	0.04599	0.13624	0.18223
0.38077	0.21398	0.02126	0.19096	0.21223		0.38077	0.156	0.00192	0.17481	0.17673					0.20077	0.12019	0.02277	0.07898	0.10175		0.20077	0.1578	0.02819	0.15122	0.17941
0.45389	0.21315	0.01415	0.20537	0.21951		0.45389	0.1685	0.000451858	0.16758	0.16803					0.26606	0.10167	0.00866	0.08751	0.09617		0.26606	0.17846	0.01545	0.16428	0.17973
0.52702	0.20945	0.00858	0.21849	0.22707		0.52702	0.15368	7.30038e-05	0.15722	0.15729					0.33136	0.08329	0.00217	0.09672	0.09889		0.33136	0.16871	0.00744	0.17382	0.18125
0.60014	0.23117	0.00467	0.22957	0.23424		0.60014	0.15031	7.44948e-06	0.14396	0.14396					0.39665	0.10534	0.000311915	0.10662	0.10693		0.39665	0.17628	0.00307	0.17809	0.18116
0.67326	0.2284	0.00224	0.23778	0.24002		0.67326	0.09727	4.33706e-07	0.12824	0.12824					0.46195	0.10077	2.16961e-05	0.11716	0.11718		0.46195	0.16596	0.00106	0.17544	0.1765
0.74638	0.23662	0.000931303	0.24224	0.24318		0.74638	0.11703	1.27166e-08	0.11074	0.11074					0.52724	0.10422	5.78362e-07	0.1283	0.1283		0.52724	0.15004	0.000298435	0.16473	0.16503
0.8195	0.23768	0.000326355	0.24213	0.24245		0.8195	0.08786	1.60959e-10	0.09233	0.09233					0.59254	0.12535	4.32164e-09	0.13994	0.13994		0.59254	0.14889	6.57593e-05	0.14587	0.14594
0.89263	0.23121	9.39356e-05	0.23674	0.23684		0.89263	0.07184	7.263e-13	0.07399	0.07399					0.65784	0.11866	5.90674e-12	0.15195	0.15195		0.65784	0.1191	1.09165e-05	0.12027	0.12028
0.96575	0.20841	2.15157e-05	0.22568	0.2257		0.96575	0.05844	9.20814e-16	0.05669	0.05669					0.72313	0.17679	8.2559e-16	0.16418	0.16418		0.72313	0	1.3025e-06	0.09088	0.09088
1.03887	0.20574	3.78054e-06	0.20893	0.20894		1.03887	0.02929	2.44039e-19	0.04129	0.04129					0.78843	0.18629	5.37452e-21	0.17638	0.17638		0.78843	0.08422	1.05735e-07	0.06175	0.06175
1.11199	0.18619	4.88432e-07	0.18701	0.18701		1.11199	0.02072	9.37376e-24	0.02841	0.02841					0.85372	0.20535	5.64926e-28	0.18827	0.18827		0.85372	0.01232	5.47783e-09	0.03687	0.03687
1.18511	0.14839	4.41735e-08	0.16101	0.16101		1.18511	0.02142	3.31822e-29	0.01832	0.01832					0.91902	0.21433	2.30468e-37	0.19952	0.19952		0.91902	0.0191	1.68039e-10	0.0188	0.0188
1.25824	0.12271	2.64161e-09	0.13256	0.13256		1.25824	0.01234	6.18928e-36	0.01098	0.01098					0.98431	0.22047	5.3602e-50	0.20972	0.20972		0.98431	0	2.7954e-12	0.00792	0.00792
1.33136	0.12428	9.77557e-11	0.10364	0.10364		1.33136	0.01929	3.05062e-44	0.00607	0.00607					1.04961	0.22204	5.38118e-67	0.21842	0.21842		1.04961	0	2.27406e-14	0.00264	0.00264
1.40448	0.06556	2.07217e-12	0.07635	0.07635		1.40448	0	1.69465e-54	0.00305	0.00305					1.1149	0.2251	7.23855e-90	0.22512	0.22512		1.1149	0.0013	8.00887e-17	0.000665203	0.000665203
1.4776	0.06551	2.29892e-14	0.05252	0.05252		1.4776	0	3.70632e-67	0.00138	0.00138					1.1802	0.22203	1.21988e-120	0.22932	0.22932		1.1802	0.00177	1.05776e-19	0.000118915	0.000118915
1.55072	0.04143	1.20103e-16	0.03339	0.03339											1.2455	0.23774	4.79528e-162	0.23051	0.23051		1.2455	0.00145	4.42426e-23	1.40473e-05	1.40473e-05
1.62384	0	2.61082e-19	0.01938	0.01938											1.31079	0.23004	9.32239e-218	0.22827	0.22827		1.31079	0.00169	4.80354e-27	1.0048e-06	1.0048e-06
1.69697	0	2.04306e-22	0.01014	0.01014											1.37609	0.22784	1.02335e-292	0.22226	0.22226		1.37609	0.00367	1.07184e-31	3.91423e-08	3.91423e-08
1.77009	0	4.85824e-26	0.0047	0.0047											1.44138	0.21736	0	0.21232	0.21232		1.44138	0.00578	3.73635e-37	7.29567e-10	7.29567e-10
1.84321	0	2.87986e-30	0.0019	0.0019											1.50668	0.20758	0	0.1985	0.1985
1.91633	0	3.37751e-35	0.000653082	0.000653082											1.57197	0.20561	0	0.18113	0.18113
1.98945	0	5.9844e-41	0.000187263	0.000187263											1.63727	0.18392	0	0.16081	0.16081
2.06258	0	1.16955e-47	4.35169e-05	4.35169e-05											1.70256	0.16784	0	0.13841	0.13841
2.1357	0	1.74677e-55	7.9437e-06	7.9437e-06											1.76786	0.08392	0	0.11505	0.11505
2.20882	0	1.29933e-64	1.09901e-06	1.09901e-06											1.83315	0.08392	0	0.09194	0.09194
2.28194	0	2.922e-75	1.10605e-07	1.10605e-07											1.89845	0.1027	0	0.07028	0.07028

## Sheet: Bar graph
Slack															Slack+SCYL1
			open time				Closed time=<30ms				Frequency	Closed time>30ms						open time				Closed time=<30ms				Frequency	Closed time>30ms
Filename	P(open)	Conductance	tau1	area1	tau2	area2	tau1	area1	tau2	area2					Filename	P(open)	Conductance	tau1	area1	tau2	area2	tau1	area1	tau2	area2
2019_09_25_0070	16.28	72.3333	0.5231	18.52	5.2362	81.48	0.4238	25.62	1.8521	74.38	13	1823.77			2019_09_25_0017	22.321	77.3	0.8652	15.68	12.3621	84.32	0.3562	50.56	4.5234	49.44	159	128.41
2019_09_27_0009	12.49	71.1667	0.6328	17.25	4.7865	82.75	0.3561	23.58	1.7652	76.42	7	2943.04			2019_09_25_0068	24.38	77.1667	0.5635	12.56	11.28	87.44	0.5324	53.62	3.5876	46.38	25	384.024
2019_09_27_0010	7.69	69.5	0.7256	21.52	6.325	78.48	0.5231	31.25	1.5421	68.75	8	2949.53			2019_09_25_0067	24.55	73.8333	0.77398	14.57	10.5964	85.43	0.40055	55.09	3.87559	44.91	17	574.582
2019_09_27_0017	13.89	80.8333	0.8215	22.92	5.2314	77.08	0.5021	32.52	1.2685	67.48	41	507.826			2019_09_25_0048	24.6	77.6667	0.6685	17.56	10.8524	82.44	0.4235	59.62	4.3581	40.38	41	119.396
2019_09_27_0031	18.67	72.3333	0.71092	19.35	4.95553	80.65	0.46002	29.63	1.59598	70.37					2019_09_25_0047	34	75.3333	0.4526	16.85	9.8652	83.15	0.2862	60.86	4.9651	39.14	34	513.323
2019_09_27_0047	14.29	83.4667	0.9328	18.35	4.8652	81.65	0.6721	28.63	1.4562	71.37	64	282.03			2019_09_25_0034	28.12	80.8333	0.3586	18.62	8.6552	81.38	0.5421	61.28	3.6542	38.72	22	202.134
2019_09_27_0050	5.35	83.6667	0.8526	22.52	4.5685	77.48	0.5328	29.68	1.3582	70.32	95	232.537			2019_09_25_0006	32.6	74.6667	0.8952	12.53	7.5624	87.47	0.6328	42.92	3.7651	57.08	60	125.328
2019_09_27_0064	6.34	85.1667	0.7521	18.52	4.8952	81.48	0.3541	31.85	1.5456	68.15	42	592.879			2019_09_25_0016	20.1	74.76	1.0562	13.56	11.8562	86.44	0.3571	55.26	2.6581	44.74	35	289.53
2019_09_27_0069	19.921	89.6667	0.5923	16.25	4.9527	83.75	0.4328	33.52	1.8621	66.48	104	156.045			2019_09_25_0020	23.9	80.3333	0.9625	14.52	12.5642	85.48	0.3985	50.25	2.9635	49.75	71	157.278
2019_09_27_0085	7.36	83.1667	0.9321	22.25	4.6352	77.75	0.3864	31.52	1.9522	68.48	26	959.633			2019_09_25_0021	25.33	80.3167	0.8695	12.65	13.5622	87.35	0.2854	54.62	3.8657	45.38	106	83.6939
2019_09_27_0089	7.46	84	1.052	21.25	5.1285	78.75	0.5632	30.52	1.4265	69.48	35	668.641			2019_09_25_0036	22.2	75.6667	1.1852	17.62	8.698	82.38	0.3954	58.62	3.1528	41.38	45	250.011
2019_09_27_0098	6.5	83	0.53289	19.52	5.2634	80.48	0.66541	28.62	1.3657	71.38	92	214.612			2019_09_25_0066	28.26	86	0.9852	12.54	9.652	87.46	0.4826	54.52	4.8651	45.48	13	281.658
2019_09_27_0117	5.23	85.6667	0.5462	18.32	5.048	81.68	0.5214	27.81	1.6854	72.19	42	624.979			2019_09_25_0060	24.91	76.1667	0.8654	11.86	8.7146	88.14	0.35128	60.42	4.2183	39.58	47	91.0499
